# Supplementary material for: Integration of Transcriptomics and Metabolomics to Reveal the Molecular Mechanisms Underlying Rhodium Nanoparticles-Based Photodynamic Cancer Therapy
Source: MDPI journal article supplement (doi:10.3390/pharmaceutics13101629), 2021-10-06
Supplement: s1 [file s1]

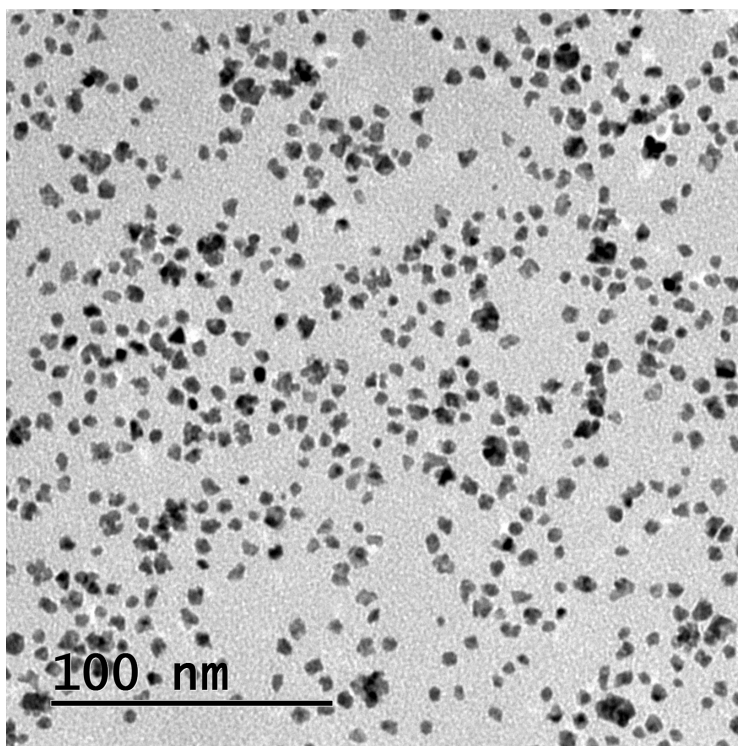

**Supplemental Figure 1.** TEM micrograph of RhNPs on aqueous suspension. Image was obtained using a JEOL JEM 1400 PLUS microscope.

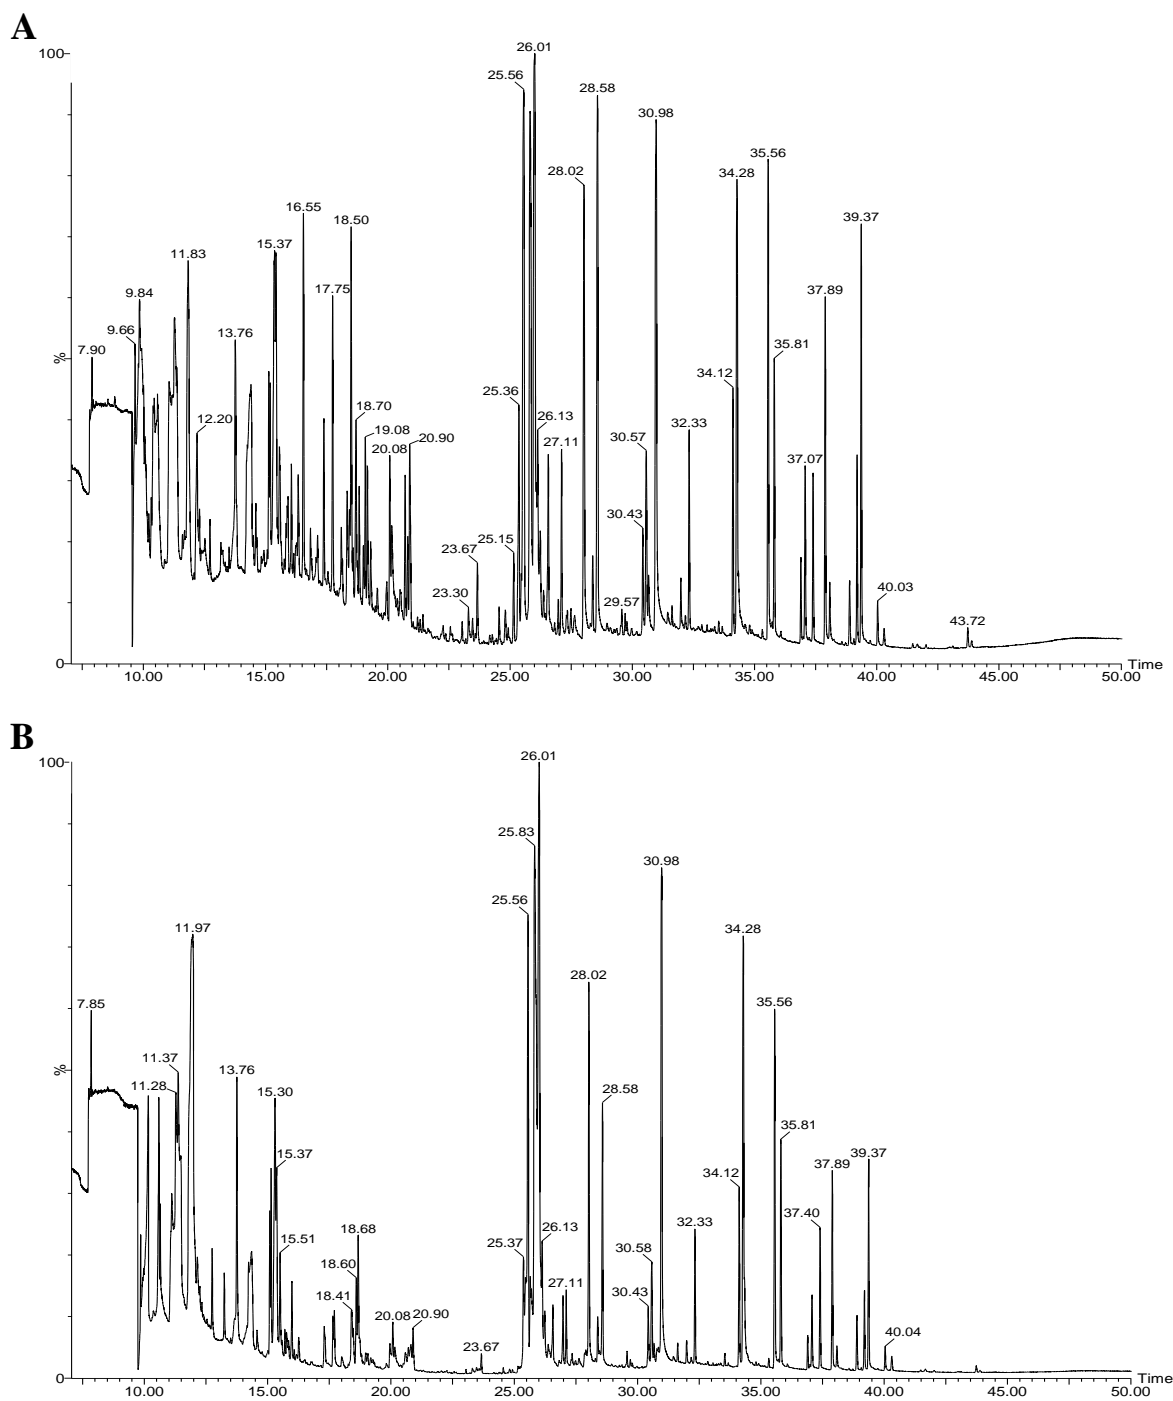

**Supplemental Figure 2.** Representative chromatograms obtained in TIC mode for metabolite extracts from control (A) and treated (B) samples.

**A**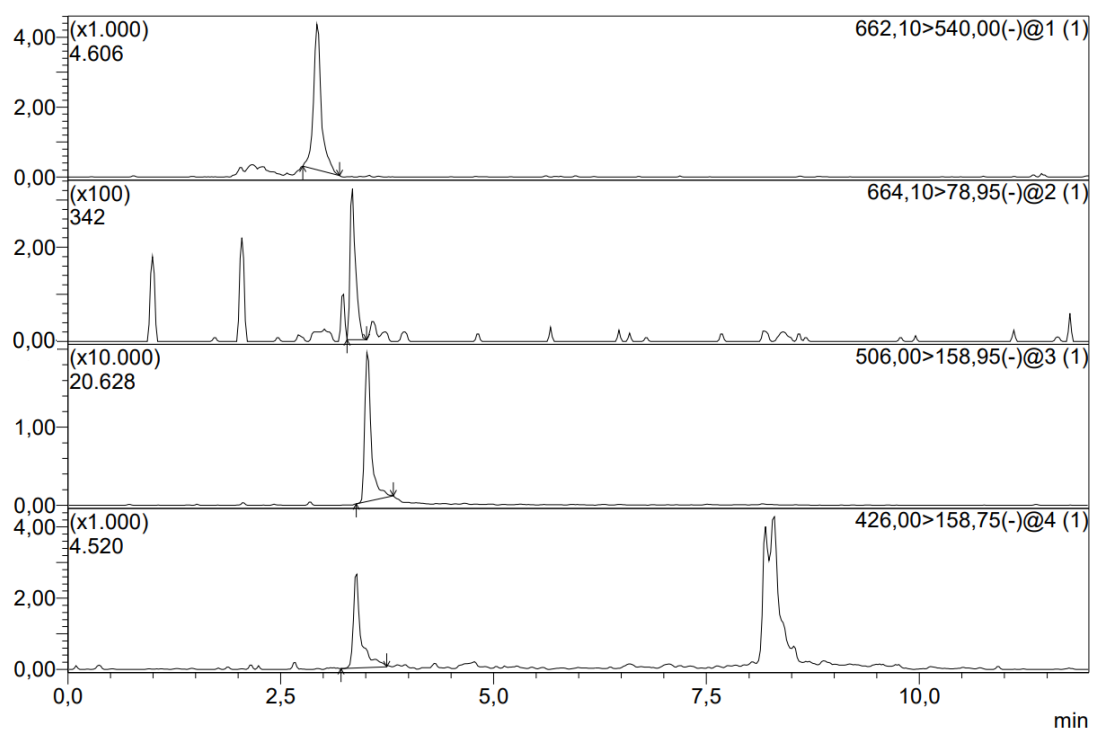**B**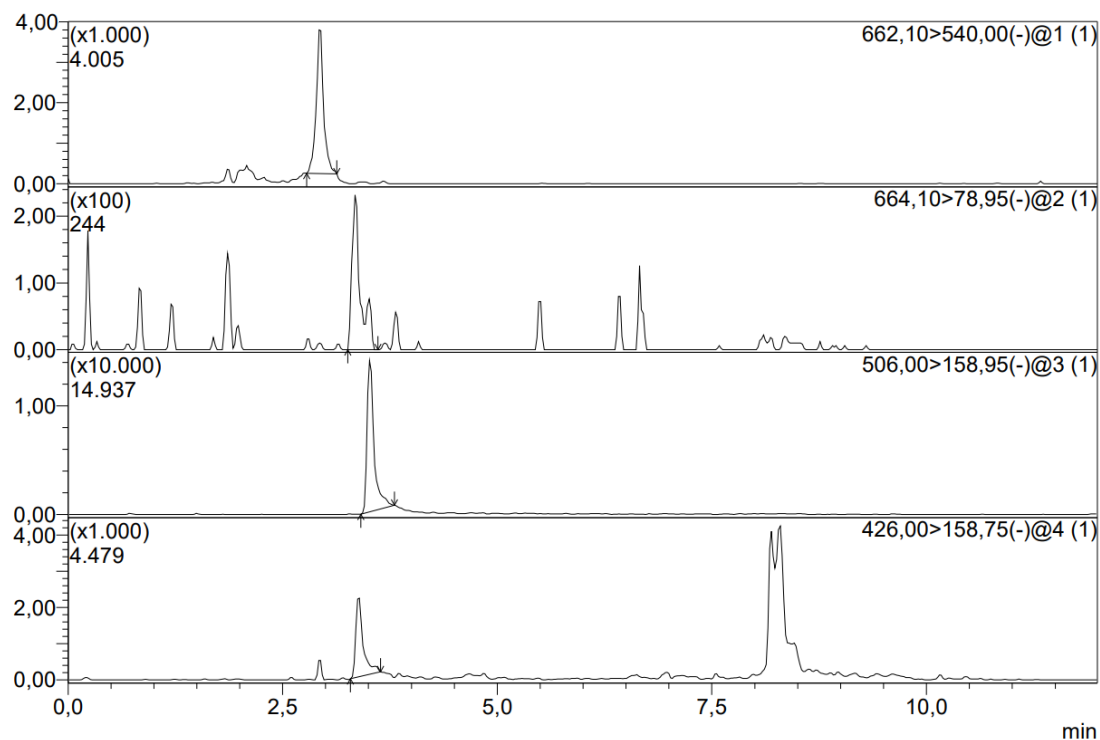

**Supplemental Figure 3.** Representative chromatograms from control (A) and treated (B) samples obtained by LC-QqQ-MS operating in MRM mode for NAD<sup>+</sup>, NADH, ATP and ADP, respectively.

**Supplemental table S1.** Transitions and collision energies used for the quantification of ATP, ADP, NADH and NAD<sup>+</sup> by LC-QqQ-MS working in MRM mode.

| Metabolite       | Precursor ion<br>[M-H] <sup>+</sup> (m/z) | Product ion (m/z) | Collision energy<br>(eV) |
|------------------|-------------------------------------------|-------------------|--------------------------|
| ATP              | 506.00                                    | 426.00            | 30                       |
| ADP              | 426.00                                    | 158.75            | 26                       |
| NADH             | 664.10                                    | 78.95             | 54                       |
| NAD <sup>+</sup> | 662.10                                    | 540.00            | 16                       |

**Supplemental table S3.** Common metabolites identified in control and treated samples by GC-TOF-MS with a minimum NIST Rmatch value of 700.

| Number | Metabolite            | Retention time (min) | NIST Rmatch |
|--------|-----------------------|----------------------|-------------|
| 1      | Acetate               | 12.293               | 709         |
| 2      | L-valine              | 12.371               | 902         |
| 3      | Serine                | 13.446               | 769         |
| 4      | L-isoleucine          | 14.144               | 907         |
| 5      | Pyruvate              | 14.484               | 778         |
| 6      | Propanedionate        | 14.743               | 813         |
| 7      | Propionate            | 14.872               | 835         |
| 8      | Butanoate             | 15.047               | 739         |
| 9      | Nonanoate             | 15.425               | 778         |
| 10     | L-threonine           | 15.978               | 833         |
| 11     | Pentanedionate        | 16.319               | 801         |
| 12     | Cyclohexanamine       | 16.587               | 921         |
| 13     | B-alanine             | 16.795               | 811         |
| 14     | Decanoate             | 17.451               | 805         |
| 15     | Malate                | 18.056               | 865         |
| 16     | L-proline             | 18.468               | 888         |
| 17     | L-aspartate           | 18.665               | 890         |
| 18     | Creatinine            | 19.198               | 735         |
| 19     | Cytein                | 19.394               | 750         |
| 20     | Dodecanoate           | 21.197               | 852         |
| 21     | D-xylofuranose        | 21.684               | 851         |
| 22     | Pyrimidine            | 21.766               | 733         |
| 23     | Phosphate             | 23.296               | 905         |
| 24     | Azelate               | 23.807               | 826         |
| 25     | Propanetricarboxylate | 24.278               | 823         |
| 26     | Tetradecanoate        | 24.696               | 865         |
| 27     | Fructose              | 25.022               | 837         |
| 28     | Galactose             | 25.430               | 857         |
| 29     | Glucose               | 25.575               | 709         |
| 30     | Hexadecanenitrile     | 25.580               | 900         |
| 31     | D-mannitol            | 25.864               | 713         |
| 32     | N-pentadecanoate      | 26.324               | 823         |
| 33     | Gluconate             | 26.562               | 778         |
| 34     | Hexadecanoate         | 27.885               | 826         |
| 35     | Oleanitrile           | 28.417               | 930         |
| 36     | Myo-inositol          | 28.438               | 814         |
| 37     | Octadecanenitrile     | 28.830               | 880         |

|    |                        |        |     |
|----|------------------------|--------|-----|
| 38 | Heptadecanoate         | 28.975 | 863 |
| 39 | 11-trans-octadecenoate | 30.546 | 864 |
| 40 | Oleate                 | 30.671 | 791 |
| 41 | Dehydroabietate        | 32.711 | 748 |
| 42 | Mystirate              | 32.938 | 889 |
| 42 | Eicosanoate            | 33.553 | 845 |
| 44 | Monopalmitoglycerol    | 35.026 | 826 |
| 45 | 2- monostearin         | 37.367 | 831 |
| 46 | Octadecanoate          | 37.574 | 879 |
| 47 | Decanedionate          | 38.081 | 844 |
| 48 | Cholesterol            | 41.615 | 895 |

Supplemental Table S4. Pearson’s correlation matrix data for the 48 identified metabolites.

|    | 1       | 2       | 3       | 4       | 5       | 6       | 7       | 8       | 9       | 10      | 11      | 12      | 13      | 14      | 15      | 16      | 17      | 18     | 19      | 20       | 21      | 22      | 23      | 24      | 25      | 26      | 27      | 28      | 29      | 30     | 31      | 32     | 33     | 34     | 35 | 36 | 37 | 38 | 39 | 40 | 41 | 42 | 43 | 44 | 45 | 46 | 47 | 48 |  |  |  |  |  |
|----|---------|---------|---------|---------|---------|---------|---------|---------|---------|---------|---------|---------|---------|---------|---------|---------|---------|--------|---------|----------|---------|---------|---------|---------|---------|---------|---------|---------|---------|--------|---------|--------|--------|--------|----|----|----|----|----|----|----|----|----|----|----|----|----|----|--|--|--|--|--|
| 1  | 1       |         |         |         |         |         |         |         |         |         |         |         |         |         |         |         |         |        |         |          |         |         |         |         |         |         |         |         |         |        |         |        |        |        |    |    |    |    |    |    |    |    |    |    |    |    |    |    |  |  |  |  |  |
| 2  | 0.7885  | 1       |         |         |         |         |         |         |         |         |         |         |         |         |         |         |         |        |         |          |         |         |         |         |         |         |         |         |         |        |         |        |        |        |    |    |    |    |    |    |    |    |    |    |    |    |    |    |  |  |  |  |  |
| 3  | -0.1752 | -0.0524 | 1       |         |         |         |         |         |         |         |         |         |         |         |         |         |         |        |         |          |         |         |         |         |         |         |         |         |         |        |         |        |        |        |    |    |    |    |    |    |    |    |    |    |    |    |    |    |  |  |  |  |  |
| 4  | 0.5042  | 0.6641  | 0.2869  | 1       |         |         |         |         |         |         |         |         |         |         |         |         |         |        |         |          |         |         |         |         |         |         |         |         |         |        |         |        |        |        |    |    |    |    |    |    |    |    |    |    |    |    |    |    |  |  |  |  |  |
| 5  | 0.1986  | 0.3224  | 0.3033  | 0.3247  | 1       |         |         |         |         |         |         |         |         |         |         |         |         |        |         |          |         |         |         |         |         |         |         |         |         |        |         |        |        |        |    |    |    |    |    |    |    |    |    |    |    |    |    |    |  |  |  |  |  |
| 6  | -0.0647 | -0.0720 | -0.0784 | -0.3252 | 0.1201  | 1       |         |         |         |         |         |         |         |         |         |         |         |        |         |          |         |         |         |         |         |         |         |         |         |        |         |        |        |        |    |    |    |    |    |    |    |    |    |    |    |    |    |    |  |  |  |  |  |
| 7  | 0.1918  | 0.2615  | -0.4781 | -0.1908 | 0.2586  | 0.6497  | 1       |         |         |         |         |         |         |         |         |         |         |        |         |          |         |         |         |         |         |         |         |         |         |        |         |        |        |        |    |    |    |    |    |    |    |    |    |    |    |    |    |    |  |  |  |  |  |
| 8  | -0.0649 | 0.1360  | -0.0796 | 0.1246  | 0.0462  | 0.4306  | 0.6288  | 1       |         |         |         |         |         |         |         |         |         |        |         |          |         |         |         |         |         |         |         |         |         |        |         |        |        |        |    |    |    |    |    |    |    |    |    |    |    |    |    |    |  |  |  |  |  |
| 9  | -0.4384 | -0.1702 | 0.6791  | 0.0812  | -0.0723 | -0.1230 | -0.3929 | 0.2223  | 1       |         |         |         |         |         |         |         |         |        |         |          |         |         |         |         |         |         |         |         |         |        |         |        |        |        |    |    |    |    |    |    |    |    |    |    |    |    |    |    |  |  |  |  |  |
| 10 | -0.1079 | 0.0532  | 0.7602  | 0.3227  | 0.4298  | 0.4470  | 0.0422  | 0.2424  | 0.3341  | 1       |         |         |         |         |         |         |         |        |         |          |         |         |         |         |         |         |         |         |         |        |         |        |        |        |    |    |    |    |    |    |    |    |    |    |    |    |    |    |  |  |  |  |  |
| 11 | 0.1707  | -0.0369 | 0.0239  | 0.1522  | 0.0902  | 0.4299  | 0.1892  | 0.1984  | -0.0221 | 0.3173  | 1       |         |         |         |         |         |         |        |         |          |         |         |         |         |         |         |         |         |         |        |         |        |        |        |    |    |    |    |    |    |    |    |    |    |    |    |    |    |  |  |  |  |  |
| 12 | 0.0818  | 0.0533  | -0.0380 | 0.0220  | -0.0492 | -0.1189 | -0.2114 | -0.5502 | -0.1471 | -0.1139 | -0.2582 | 1       |         |         |         |         |         |        |         |          |         |         |         |         |         |         |         |         |         |        |         |        |        |        |    |    |    |    |    |    |    |    |    |    |    |    |    |    |  |  |  |  |  |
| 13 | 0.0443  | 0.0692  | 0.1746  | 0.1653  | 0.5902  | 0.3683  | 0.1449  | -0.0562 | 0.0059  | 0.4081  | 0.6404  | 0.2094  | 1       |         |         |         |         |        |         |          |         |         |         |         |         |         |         |         |         |        |         |        |        |        |    |    |    |    |    |    |    |    |    |    |    |    |    |    |  |  |  |  |  |
| 14 | 0.2380  | 0.4135  | 0.3323  | 0.3869  | 0.6377  | 0.5478  | 0.2812  | 0.1853  | 0.0107  | 0.6922  | 0.4258  | 0.1717  | 0.5644  | 1       |         |         |         |        |         |          |         |         |         |         |         |         |         |         |         |        |         |        |        |        |    |    |    |    |    |    |    |    |    |    |    |    |    |    |  |  |  |  |  |
| 15 | -0.2261 | -0.0924 | -0.0966 | -0.2470 | 0.2084  | 0.3999  | -0.5523 | 0.3609  | -0.0353 | 0.2043  | 0.1983  | -0.2564 | 0.1988  | 0.1419  | 1       |         |         |        |         |          |         |         |         |         |         |         |         |         |         |        |         |        |        |        |    |    |    |    |    |    |    |    |    |    |    |    |    |    |  |  |  |  |  |
| 16 | 0.0642  | 0.4941  | 0.4764  | 0.5515  | 0.4112  | -0.0249 | 0.2086  | 0.5496  | 0.4251  | 0.5222  | -0.2332 | -0.2933 | -0.0962 | 0.3671  | 0.2262  | 1       |         |        |         |          |         |         |         |         |         |         |         |         |         |        |         |        |        |        |    |    |    |    |    |    |    |    |    |    |    |    |    |    |  |  |  |  |  |
| 17 | 0.2462  | 0.4233  | 0.4703  | 0.3189  | 0.6051  | 0.2801  | 0.5387  | 0.4801  | 0.1457  | 0.6601  | 0.0960  | -0.3011 | 0.1892  | 0.4902  | 0.4152  | 0.7628  | 1       |        |         |          |         |         |         |         |         |         |         |         |         |        |         |        |        |        |    |    |    |    |    |    |    |    |    |    |    |    |    |    |  |  |  |  |  |
| 18 | 0.2148  | 0.5711  | -0.0532 | 0.1769  | 0.2925  | 0.4191  | 0.5938  | 0.4966  | 0.0160  | 0.2735  | 0.0075  | -0.1743 | 0.0948  | 0.5027  | 0.6282  | 0.5765  | 0.5491  | 1      |         |          |         |         |         |         |         |         |         |         |         |        |         |        |        |        |    |    |    |    |    |    |    |    |    |    |    |    |    |    |  |  |  |  |  |
| 19 | 0.0051  | 0.1328  | 0.2783  | 0.1682  | 0.6456  | 0.4835  | 0.2332  | 0.2401  | -0.0406 | 0.6246  | 0.4267  | -0.3678 | 0.6309  | 0.7176  | 0.4251  | 0.2959  | 0.4963  | 0.3828 | 1       |          |         |         |         |         |         |         |         |         |         |        |         |        |        |        |    |    |    |    |    |    |    |    |    |    |    |    |    |    |  |  |  |  |  |
| 20 | 0.2304  | 0.1229  | -0.1414 | -0.2732 | 0.1539  | 0.4350  | 0.4429  | -0.0761 | -0.1608 | 0.0376  | 0.5493  | -0.0537 | 0.4136  | 0.3515  | 0.4192  | -0.2717 | 0.1754  | 0.3397 | 0.1525  | 1        |         |         |         |         |         |         |         |         |         |        |         |        |        |        |    |    |    |    |    |    |    |    |    |    |    |    |    |    |  |  |  |  |  |
| 21 | 0.1581  | 0.3725  | 0.0693  | 0.3083  | 0.5900  | 0.4960  | 0.4265  | 0.4674  | 0.0445  | 0.4066  | 0.3903  | -0.4524 | 0.4642  | 0.8143  | 0.0846  | 0.3941  | 0.4091  | 0.4019 | 0.6781  | 0.1902   | 1       |         |         |         |         |         |         |         |         |        |         |        |        |        |    |    |    |    |    |    |    |    |    |    |    |    |    |    |  |  |  |  |  |
| 22 | -0.2106 | -0.0609 | -0.4518 | -0.4467 | 0.0449  | 0.0546  | 0.5011  | 0.1271  | -0.3837 | -0.3260 | -0.4088 | -0.0944 | -0.2619 | -0.2164 | 0.1027  | -0.0386 | 0.0633  | 0.0658 | -0.1766 | 0.0830   | -0.0076 | 1       |         |         |         |         |         |         |         |        |         |        |        |        |    |    |    |    |    |    |    |    |    |    |    |    |    |    |  |  |  |  |  |
| 23 | 0.2342  | 0.4949  | -0.0480 | 0.2538  | 0.6338  | 0.3264  | 0.5532  | 0.4871  | -0.0064 | 0.2032  | 0.1280  | -0.5262 | 0.2286  | 0.6550  | 0.3364  | 0.5460  | 0.5220  | 0.6288 | 0.5806  | 0.2266   | 0.8647  | 0.1240  | 1       |         |         |         |         |         |         |        |         |        |        |        |    |    |    |    |    |    |    |    |    |    |    |    |    |    |  |  |  |  |  |
| 24 | -0.0399 | 0.1472  | 0.0852  | 0.2906  | 0.3030  | 0.5511  | 0.4176  | 0.4275  | -0.0164 | 0.5938  | 0.7289  | -0.2971 | 0.6121  | 0.6727  | 0.4881  | 0.2394  | 0.3948  | 0.4478 | 0.6758  | 0.3981   | 0.6017  | -0.1306 | 0.4201  | 1       |         |         |         |         |         |        |         |        |        |        |    |    |    |    |    |    |    |    |    |    |    |    |    |    |  |  |  |  |  |
| 25 | 0.3279  | 0.3887  | 0.3155  | 0.2155  | 0.3451  | 0.1293  | -0.1099 | -0.0169 | 0.3123  | 0.1874  | 0.1178  | -0.2917 | 0.1551  | 0.5301  | -0.1430 | 0.2771  | 0.2126  | 0.2002 | 0.3437  | 0.1715   | 0.6040  | -0.3917 | 0.6157  | 0.0227  | 1       |         |         |         |         |        |         |        |        |        |    |    |    |    |    |    |    |    |    |    |    |    |    |    |  |  |  |  |  |
| 26 | 0.1976  | 0.2322  | -0.1495 | 0.1695  | 0.5096  | 0.7071  | 0.6523  | 0.3939  | -0.3527 | 0.4235  | 0.5610  | -0.2188 | 0.5928  | 0.7252  | 0.2265  | 0.1165  | 0.3822  | 0.3025 | 0.6721  | 0.3198   | 0.8105  | 0.1036  | 0.6075  | 0.7409  | 0.2129  | 1       |         |         |         |        |         |        |        |        |    |    |    |    |    |    |    |    |    |    |    |    |    |    |  |  |  |  |  |
| 27 | 0.0130  | -0.0784 | 0.1600  | -0.1160 | 0.3936  | 0.3924  | 0.1224  | -0.0582 | 0.1392  | 0.2589  | 0.7371  | -0.0263 | 0.8726  | 0.4214  | 0.2542  | -0.2545 | 0.1201  | 0.0319 | 0.5404  | 0.6288   | 0.3909  | -0.2824 | 0.2075  | 0.4980  | 0.3072  | 0.4412  | 1       |         |         |        |         |        |        |        |    |    |    |    |    |    |    |    |    |    |    |    |    |    |  |  |  |  |  |
| 28 | 0.0843  | 0.2090  | -0.4090 | -0.1318 | -0.3486 | -0.0725 | 0.1547  | -0.0366 | -0.4106 | -0.2660 | -0.2324 | -0.1206 | -0.3574 | -0.2701 | 0.3670  | 0.0011  | -0.0368 | 0.3213 | 0.0316  | 0.0014   | -0.2736 | 0.2898  | -0.0426 | 0.0390  | -0.2597 | -0.1311 | -0.3290 | 1       |         |        |         |        |        |        |    |    |    |    |    |    |    |    |    |    |    |    |    |    |  |  |  |  |  |
| 29 | 0.1783  | 0.3789  | 0.3725  | 0.4206  | 0.6845  | 0.3439  | 0.1013  | 0.1723  | 0.0096  | 0.6542  | 0.3283  | -0.2039 | 0.6325  | 0.7814  | 0.1974  | 0.4144  | 0.5111  | 0.4056 | 0.9329  | 0.0338   | 0.6900  | -0.2680 | 0.5617  | 0.6041  | 0.4151  | 0.6101  | 0.4525  | -0.0212 | 1       |        |         |        |        |        |    |    |    |    |    |    |    |    |    |    |    |    |    |    |  |  |  |  |  |
| 30 | -0.2938 | -0.3214 | 0.1186  | -0.3356 | -0.1466 | 0.4214  | 0.3151  | 0.1538  | 0.2222  | 0.2724  | 0.5432  | -0.0400 | 0.3707  | -0.0204 | 0.4979  | -0.1229 | 0.2105  | 0.0219 | 0.1325  | 0.5328   | -0.0462 | -0.0247 | -0.1411 | 0.4720  | -0.1475 | 0.2123  | 0.5480  | 0.0434  | -0.0584 | 1      |         |        |        |        |    |    |    |    |    |    |    |    |    |    |    |    |    |    |  |  |  |  |  |
| 31 | 0.2309  | 0.4402  | 0.2187  | 0.5046  | 0.1167  | 0.4527  | 0.2619  | 0.2273  | -0.0093 | 0.6238  | 0.2501  | 0.0992  | 0.1605  | 0.6863  | 0.0919  | 0.4220  | 0.3602  | 0.4945 | 0.2427  | 0.1463   | 0.4084  | -0.2539 | 0.2682  | 0.5887  | 0.1737  | 0.4843  | -0.0690 | -0.0190 | 0.3585  | 0.0748 | 1       |        |        |        |    |    |    |    |    |    |    |    |    |    |    |    |    |    |  |  |  |  |  |
| 32 | -0.3329 | -0.1538 | -0.3613 | -0.4695 | -0.0421 | 0.2515  | 0.5172  | 0.2048  | -0.2540 | -0.1601 | -0.3107 | 0.0495  | -0.1534 | -0.1353 | 0.0360  | -0.0655 | 0.0292  | 0.0479 | -0.2001 | 0.0815   | 0.0167  | 0.9257  | 0.0049  | -0.0250 | -0.4622 | 0.1786  | -0.2172 | 0.1194  | -0.2704 | 0.0990 | -0.0821 | 1      |        |        |    |    |    |    |    |    |    |    |    |    |    |    |    |    |  |  |  |  |  |
| 33 | -0.0568 | 0.1015  | -0.3728 | -0.0886 | 0.3501  | 0.4397  | 0.5671  | 0.2480  | -0.3752 | 0.0785  | 0.1465  | -0.1515 | 0.2935  | 0.3504  | 0.8112  | 0.1250  | 0.2026  | 0.6476 | 0.5541  | 0.2957   | 0.3382  | 0.1349  | 0.5317  | 0.5213  | -0.0248 | 0.4834  | 0.1889  | 0.4021  | 0.3928  | 0.1216 | 0.2220  | 0.0439 | 1      |        |    |    |    |    |    |    |    |    |    |    |    |    |    |    |  |  |  |  |  |
| 34 | -0.0089 | 0.0435  | 0.2065  | 0.0005  | 0.2513  | 0.2593  | 0.3691  | 0.0209  | -0.1498 | 0.4517  | 0.3446  | -0.2313 | 0.1918  | 0.3896  | 0.3034  | 0.1329  | 0.4967  | 0.1613 | 0.2323  | 0.5640   | 0.2028  | 0.3388  | 0.1598  | 0.5387  | -0.1041 | 0.3927  | 0.2028  | 0.0825  | 0.1383  | 0.4871 | 0.3787  | 0.3388 | 0.1285 | 1      |    |    |    |    |    |    |    |    |    |    |    |    |    |    |  |  |  |  |  |
| 35 | -0.2548 | -0.0125 | 0.0005  | 0.0813  | 0.2220  | 0.4503  | 0.6016  | 0.6435  | 0.1615  | 0.3992  | 0.5465  | -0.2795 | 0.4649  | 0.3299  | 0.6251  | 0.3097  | 0.4479  | 0.4515 | 0.3882  | 0.3774   | 0.3946  | 0.1402  | 0.3326  | 0.8195  | -0.2394 | 0.5235  | 0.4059  | -0.0367 | 0.2655  | 0.6152 | 0.3148  | 0.2560 | 0.4474 | 0.4916 | 1  |    |    |    |    |    |    |    |    |    |    |    |    |    |  |  |  |  |  |
| 36 | 0.2815  | 0.2755  | -0.3815 | -0.2350 | 0.4151  | 0.3894  | 0.8608  | 0.4020  | -0.3643 | -0.1210 | -0.0458 | -0.0460 | 0.1130  | 0.1216  | 0.3757  | 0.1348  | 0.4735  | 0.4539 | 0.0795  | 0.4170</ |         |         |         |         |         |         |         |         |         |        |         |        |        |        |    |    |    |    |    |    |    |    |    |    |    |    |    |    |  |  |  |  |  |

**Supplemental Table S5.** PCA score values for controls and treated samples on the PC3.

| <b>Samples</b> | <b>PC3 (11%)</b> |
|----------------|------------------|
| Control 1 (C1) | -0.415           |
| Control 2 (C2) | -1.820           |
| Control 3 (C3) | -1.175           |
| Control 4 (C4) | -2.041           |
| Control 5 (C5) | -4.537           |
| Control 6 (C6) | -2.156           |
| Control 7 (C7) | -0.643           |
| Treated 1 (R1) | 1.915            |
| Treated 2 (R2) | 2.129            |
| Treated 3 (R3) | 1.576            |
| Treated 4 (R4) | 0.803            |
| Treated 5 (R5) | 0.429            |
| Treated 6 (R6) | 5.753            |
| Treated 7 (R7) | 0.182            |
