# Supplementary material for: Integration of Transcriptomics and Metabolomics to Reveal the Molecular Mechanisms Underlying Rhodium Nanoparticles-Based Photodynamic Cancer Therapy
Source: MDPI journal article supplement (doi:10.3390/pharmaceutics13101629), 2021-10-06
Supplement: s1 [file s1]

Supplemental table S2. Whole transcriptomanalysis of HeLa cells exposed to RhNPs+NIR.

| <b>RhNPs vs. Control</b> | <b>Gene code</b>                              | <b>Gene name</b>                                                                                                                                                               |
|--------------------------|-----------------------------------------------|--------------------------------------------------------------------------------------------------------------------------------------------------------------------------------|
| 1,61                     | BRD9                                          | Transcript Identified by AceView, Entrez Gene ID(s) 65980                                                                                                                      |
| 1,58                     | AP3B1                                         | Memczak2013 ALT_ACCEPTOR, ALT_DONOR, coding, INTERNAL, intronic best transcript NM_003664                                                                                      |
| 1,56                     | NLRP11                                        | NLR family, pyrin domain containing 11                                                                                                                                         |
| 1,56                     | IL7R                                          | interleukin 7 receptor                                                                                                                                                         |
| 1,56                     | CCDC190                                       | coiled-coil domain containing 190                                                                                                                                              |
| 1,52                     | KIDINS220                                     | Transcript Identified by AceView, Entrez Gene ID(s) 57498; 100216337                                                                                                           |
| 1,52                     | TMLHE-AS1; LOC101927830; CLIC2; RP13-228J13.1 | Homo sapiens TMLHE antisense RNA 1 (TMLHE-AS1), long non-coding RNA.; uncharacterized LOC101927830; Transcript Identified by AceView, Entrez Gene ID(s) 1193; novel transcript |
| 1,51                     | DOCK2                                         | Memczak2013 ANTISENSE, CDS, coding, INTERNAL best transcript NM_004946                                                                                                         |
| 1,51                     | SRF                                           | Jeck2013 ANTISENSE, CDS, coding, INTERNAL, intronic, OVCODE, OVEXON best transcript NM_003131                                                                                  |
| 1,50                     | USHBP1                                        | Usher syndrome 1C binding protein 1                                                                                                                                            |
| 1,49                     | CPA4                                          | carboxypeptidase A4                                                                                                                                                            |
| 1,49                     | SLA                                           | Src-like-adaptor                                                                                                                                                               |
| 1,49                     | MFAP4                                         | microfibrillar associated protein 4                                                                                                                                            |
| 1,48                     | FSIP1                                         | fibrous sheath interacting protein 1                                                                                                                                           |
| 1,48                     | RPS6KA1                                       | ribosomal protein S6 kinase, 90kDa, polypeptide 1                                                                                                                              |
| 1,48                     | MTFR1                                         | mitochondrial fission regulator 1                                                                                                                                              |
| 1,48                     | ARR3                                          | arrestin 3, retinal (X-arrestin)                                                                                                                                               |
| 1,46                     | LVRN                                          | laeverin                                                                                                                                                                       |
| 1,45                     | ZNF780A                                       | zinc finger protein 780A                                                                                                                                                       |
| 1,45                     | USP17L12                                      | ubiquitin specific peptidase 17-like family member 12                                                                                                                          |
| 1,45                     | UNC13C                                        | unc-13 homolog C (C. elegans)                                                                                                                                                  |
| 1,45                     | IGFL3                                         | IGF like family member 3                                                                                                                                                       |
| 1,44                     | TMC5                                          | transmembrane channel like 5                                                                                                                                                   |
| 1,44                     | SOCS1                                         | suppressor of cytokine signaling 1                                                                                                                                             |
| 1,44                     | TTC31                                         | Memczak2013 ALT_ACCEPTOR, ALT_DONOR, coding, INTERNAL, intronic best transcript NM_022492                                                                                      |
| 1,44                     | PSMG4                                         | proteasome (prosome, macropain) assembly chaperone 4                                                                                                                           |
| 1,44                     | SPSB2                                         | splA/ryanodine receptor domain and SOCS box containing 2                                                                                                                       |
| 1,43                     | TOX2                                          | Memczak2013 ALT_ACCEPTOR, ALT_DONOR, coding, INTERNAL, intronic best transcript NM_001098797                                                                                   |

|      |              |                                                                                                 |
|------|--------------|-------------------------------------------------------------------------------------------------|
| 1,43 | FRMD3        | FERM domain containing 3                                                                        |
| 1,43 | USP18        | ubiquitin specific peptidase 18                                                                 |
| 1,43 | SAG          | S-antigen; retina and pineal gland (arrestin)                                                   |
| 1,43 | TAL1         | T-cell acute lymphocytic leukemia 1                                                             |
| 1,43 | FAM234B      | family with sequence similarity 234, member B                                                   |
| 1,43 | OR5K2        | olfactory receptor, family 5, subfamily K, member 2                                             |
| 1,42 | MAL2         | mal, T-cell differentiation protein 2 (gene/pseudogene)                                         |
| 1,42 | SNTG1        | syntrophin, gamma 1                                                                             |
| 1,42 | RUFY3        | RUN and FYVE domain containing 3                                                                |
| 1,42 | EMCN         | endomucin                                                                                       |
| 1,42 | HAND2        | heart and neural crest derivatives expressed 2                                                  |
| 1,42 | AKAP6        | A kinase (PRKA) anchor protein 6                                                                |
| 1,41 | ANKAR        | ankyrin and armadillo repeat containing                                                         |
| 1,41 | EFCAB5       | EF-hand calcium binding domain 5                                                                |
| 1,41 | ZNF829       | zinc finger protein 829                                                                         |
| 1,41 | FMO1         | Transcript Identified by AceView, Entrez Gene ID(s)<br>2326                                     |
| 1,41 | PITPNA       | Memczak2013 ALT_ACCEPTOR, ALT_DONOR,<br>coding, INTERNAL, intronic best transcript<br>NM_006224 |
| 1,41 | FARP1        | Jeck2013 ALT_ACCEPTOR, ALT_DONOR, coding,<br>INTERNAL, intronic best transcript NM_005766       |
| 1,41 | OCLM         | oculomedin                                                                                      |
| 1,41 | INTU         | inturned planar cell polarity protein                                                           |
| 1,41 | PILRB        | Jeck2013 ANTISENSE, INTERNAL, intronic, ncRNA,<br>OVEXON best transcript NR_036569              |
| 1,41 | LRIG1        |                                                                                                 |
| 1,41 | MCF2L2       | MCF.2 cell line derived transforming sequence-like 2                                            |
| 1,40 | NEK8         | NIMA-related kinase 8                                                                           |
| 1,40 | VCY; VCY1B   | variable charge, Y-linked; variable charge, Y-linked 1B                                         |
| 1,40 | TMEM105      | transmembrane protein 105                                                                       |
| 1,40 | MYO9A        | Memczak2013 ANTISENSE, CDS, coding,<br>INTERNAL best transcript NM_006901                       |
| 1,40 | OR51E2       | olfactory receptor, family 51, subfamily E, member 2                                            |
| 1,40 | ST8SIA1      | ST8 alpha-N-acetyl-neuraminide alpha-2,8-<br>sialyltransferase 1                                |
| 1,40 | SLITRK6      | SLIT and NTRK-like family, member 6                                                             |
| 1,40 | SFTA3        | surfactant associated 3                                                                         |
| 1,40 | DEFB109P1B   | defensin, beta 109, pseudogene 1B                                                               |
| 1,39 | SELL         | Memczak2013 ALT_ACCEPTOR, ALT_DONOR,<br>coding, INTERNAL, intronic best transcript<br>NM_000655 |
| 1,39 | SYCE2        | synaptonemal complex central element protein 2                                                  |
| 1,39 | ZNF497; A1BG | zinc finger protein 497; alpha-1-B glycoprotein                                                 |
| 1,39 | LCNL1        | lipocalin-like 1                                                                                |
| 1,39 | AFF3         | AF4/FMR2 family, member 3                                                                       |
| 1,39 | TMEM167A     | Transcript Identified by AceView, Entrez Gene ID(s)<br>153339                                   |

|      |                    |                                                                                                                   |
|------|--------------------|-------------------------------------------------------------------------------------------------------------------|
| 1,39 | NADSYN1            | NAD synthetase 1                                                                                                  |
| 1,39 | SLAMF6             | Memczak2013 ANTISENSE, coding, INTERNAL, intronic best transcript NM_052931                                       |
| 1,39 | LONRF1             | Transcript Identified by AceView, Entrez Gene ID(s) 91694                                                         |
| 1,39 | MAS1               | MAS1 proto-oncogene, G protein-coupled receptor                                                                   |
| 1,39 | OR1M1              | olfactory receptor, family 1, subfamily M, member 1                                                               |
| 1,38 | MRLN               | myoregulin                                                                                                        |
| 1,38 | CUZD1              | CUB and zona pellucida-like domains 1                                                                             |
| 1,38 | DHRS2              | dehydrogenase/reductase (SDR family) member 2                                                                     |
| 1,38 | GZMH               | granzyme H                                                                                                        |
| 1,38 | NXPE2              | neurexophilin and PC-esterase domain family, member 2                                                             |
| 1,38 | TSC1               | Transcript Identified by AceView, Entrez Gene ID(s) 7248                                                          |
| 1,38 | DGKA               | diacylglycerol kinase alpha                                                                                       |
| 1,38 | PAIP2; CTB-43P18.1 | poly(A) binding protein interacting protein 2 [Source:EntrezGene;Acc:51247]; novel transcript, antisense to PAIP2 |
| 1,38 | RSPH1              | radial spoke head 1 homolog (Chlamydomonas)                                                                       |
| 1,38 | JAK2               | Memczak2013 ALT_ACCEPTOR, ALT_DONOR, coding, INTERNAL, intronic best transcript NM_004972                         |
| 1,38 | FAM53C             | family with sequence similarity 53, member C                                                                      |
| 1,38 | OR2B2              | olfactory receptor, family 2, subfamily B, member 2                                                               |
| 1,38 | KRTAP5-9           | keratin associated protein 5-9                                                                                    |
| 1,38 | CHRNE              | cholinergic receptor, nicotinic epsilon                                                                           |
| 1,38 | OR3A2              | olfactory receptor, family 3, subfamily A, member 2                                                               |
| 1,37 | ACSS2              | Memczak2013 ANTISENSE, CDS, coding, INTERNAL best transcript NM_001076552                                         |
| 1,37 | CCR2               | chemokine (C-C motif) receptor 2                                                                                  |
| 1,37 | LINC01496          | long intergenic non-protein coding RNA 1496                                                                       |
| 1,37 | IGDCC3             | immunoglobulin superfamily, DCC subclass, member 3                                                                |
| 1,37 | GHDC               | GH3 domain containing                                                                                             |
| 1,37 | OR2S2              | olfactory receptor, family 2, subfamily S, member 2 (gene/pseudogene)                                             |
| 1,37 | BIN3-IT1           | BIN3 intronic transcript 1                                                                                        |
| 1,37 | HRASLS             | HRAS-like suppressor                                                                                              |
| 1,36 | GRIN1              | glutamate receptor, ionotropic, N-methyl D-aspartate 1                                                            |
| 1,36 | SEC14L4            | SEC14-like lipid binding 4                                                                                        |
| 1,36 | GBP4               | guanylate binding protein 4                                                                                       |
| 1,36 | GBP5               | guanylate binding protein 5                                                                                       |
| 1,36 | PTPRO              | protein tyrosine phosphatase, receptor type, O                                                                    |
| 1,36 | ERBB2              | Salzman2013 ANNOTATED, coding, OVEXON, UTR5 best transcript NM_001005862                                          |
| 1,36 | ANK3               | ankyrin 3, node of Ranvier (ankyrin G)                                                                            |
| 1,36 | DYNC1I1            | dynein, cytoplasmic 1, intermediate chain 1                                                                       |

|      |         |                                                                                            |
|------|---------|--------------------------------------------------------------------------------------------|
| 1,35 | GTF3C5  | Zhang2013 ALT_ACCEPTOR, ALT_DONOR, coding, INTERNAL, intronic best transcript NM_001122823 |
| 1,35 | CYP2B6  | cytochrome P450, family 2, subfamily B, polypeptide 6                                      |
| 1,35 | EPS15L1 | epidermal growth factor receptor pathway substrate 15-like 1                               |
| 1,35 | AKR1C4  | aldo-keto reductase family 1, member C4                                                    |
| 1,35 | ASIC2   | acid sensing ion channel 2                                                                 |
| 1,35 | LAMB4   | laminin, beta 4                                                                            |
| 1,35 | BIRC6   | Transcript Identified by AceView, Entrez Gene ID(s) 57448                                  |
| 1,35 | TXNDC2  | thioredoxin domain containing 2 (spermatozoa)                                              |
| 1,35 | TLN2    | talin 2                                                                                    |
| 1,35 | PLGLB1; | plasminogen-like B1; plasminogen-like B2                                                   |
| 1,35 | PLGLB2  |                                                                                            |
| 1,35 | CTNNA2  | catenin (cadherin-associated protein), alpha 2                                             |
| 1,35 | PDGFRA  | platelet-derived growth factor receptor, alpha polypeptide                                 |
| 1,35 | MRVI1   | murine retrovirus integration site 1 homolog                                               |
| 1,35 | NTSR2   | neurotensin receptor 2                                                                     |
| 1,35 | HLTF    | Transcript Identified by AceView, Entrez Gene ID(s) 6596                                   |
| 1,35 | TAS2R4  | taste receptor, type 2, member 4                                                           |
| 1,34 | MCOLN2  | mucolipin 2                                                                                |
| 1,34 | BACH2   | Transcript Identified by AceView, Entrez Gene ID(s) 60468                                  |
| 1,34 | XAF1    | XIAP associated factor 1                                                                   |
| 1,34 | SPRN    | shadow of prion protein homolog (zebrafish)                                                |
| 1,34 | FCGR2C  | Fc fragment of IgG, low affinity IIc, receptor for (CD32) (gene/pseudogene)                |
| 1,34 | OIT3    | oncoprotein induced transcript 3                                                           |
| 1,34 | RPS15   | Memczak2013 ANTISENSE, coding, INTERNAL, intronic best transcript NM_001018                |
| 1,34 | CDCA5   | Memczak2013 ANTISENSE, CDS, coding, INTERNAL, UTR3 best transcript NM_080668               |
| 1,34 | BTG4    | B-cell translocation gene 4                                                                |
| 1,34 | CA3     | carbonic anhydrase III                                                                     |
| 1,34 | VIL1    | villin 1                                                                                   |
| 1,34 | GIPC2   | GIPC PDZ domain containing family, member 2                                                |
| 1,34 | SLC26A7 | solute carrier family 26 (anion exchanger), member 7                                       |
| 1,34 | FA2H    | fatty acid 2-hydroxylase                                                                   |
| 1,34 | SULT1C2 | sulfotransferase family 1C member 2                                                        |
| 1,34 | PIP5K1B | phosphatidylinositol-4-phosphate 5-kinase, type I, beta                                    |
| 1,34 | SPATS2L | Transcript Identified by AceView, Entrez Gene ID(s) 26010                                  |
| 1,34 | DNAH10  | dynein, axonemal, heavy chain 10                                                           |
| 1,33 | FAM153A | Transcript Identified by AceView, Entrez Gene ID(s) 285596                                 |
| 1,33 | SP140L  | SP140 nuclear body protein-like                                                            |

|      |         |                                                                                         |
|------|---------|-----------------------------------------------------------------------------------------|
| 1,33 | CHAC1   | ChaC glutathione-specific gamma-glutamylcyclotransferase 1                              |
| 1,33 | GARNL3  | GTPase activating Rap/RanGAP domain-like 3                                              |
| 1,33 | ITPR3   | Zhang2013 ALT_ACCEPTOR, ALT_DONOR, coding, INTERNAL, intronic best transcript NM_002224 |
| 1,33 | MBD3L5  | methyl-CpG binding domain protein 3-like 5                                              |
| 1,33 | ARMC4   | armadillo repeat containing 4                                                           |
| 1,33 | HMBS    | hydroxymethylbilane synthase                                                            |
| 1,33 | CCDC64  | coiled-coil domain containing 64                                                        |
| 1,33 | HDGFL1  | hepatoma derived growth factor-like 1                                                   |
| 1,33 | TSPAN16 | tetraspanin 16                                                                          |
| 1,33 | EPO     | erythropoietin                                                                          |
| 1,33 | SORL1   | Memczak2013 ANTISENSE, CDS, coding, INTERNAL best transcript NM_003105                  |
| 1,33 | DCDC2C  | doublecortin domain containing 2C                                                       |
| 1,33 | GPCPD1  | Transcript Identified by AceView, Entrez Gene ID(s) 56261                               |
| 1,33 | ADGRA1  | adhesion G protein-coupled receptor A1                                                  |
| 1,33 | GKN1    | gastrokine 1                                                                            |
| 1,33 | OTOL1   | otolin 1                                                                                |
| 1,33 | IL1RL1  | interleukin 1 receptor-like 1                                                           |
| 1,33 | XYLT1   | xylosyltransferase I                                                                    |
| 1,33 | APOBR   | apolipoprotein B receptor                                                               |
| 1,33 | TBC1D26 | TBC1 domain family, member 26                                                           |
| 1,33 | AZGP1   | alpha-2-glycoprotein 1, zinc-binding                                                    |
| 1,33 | ZNF750  | zinc finger protein 750                                                                 |
| 1,33 | CLDN34  | claudin 34                                                                              |
| 1,33 | CCZ1B   | CCZ1 homolog B, vacuolar protein trafficking and biogenesis associated                  |
| 1,33 | PADI6   | peptidyl arginine deiminase, type VI                                                    |
| 1,33 | RGS4    | regulator of G-protein signaling 4                                                      |
| 1,33 | ROS1    | ROS proto-oncogene 1 , receptor tyrosine kinase                                         |
| 1,33 | C7orf77 | chromosome 7 open reading frame 77                                                      |
| 1,33 | SLCO2B1 | solute carrier organic anion transporter family, member 2B1                             |
| 1,32 | DENND6B | DENN/MADD domain containing 6B                                                          |
| 1,32 | POLR3G  | polymerase (RNA) III (DNA directed) polypeptide G (32kD)                                |
| 1,32 | FAM186B | family with sequence similarity 186, member B                                           |
| 1,32 | SCNN1D  | sodium channel, non voltage gated 1 delta subunit                                       |
| 1,32 | PRNT    | prion protein (testis specific)                                                         |
| 1,32 | ANKRD55 | ankyrin repeat domain 55                                                                |
| 1,32 | FGF16   | fibroblast growth factor 16                                                             |
| 1,32 | FAM169A | family with sequence similarity 169, member A                                           |
| 1,32 | ASXL3   | additional sex combs like transcriptional regulator 3                                   |
| 1,32 | PHGDH   | Memczak2013 ANTISENSE, CDS, coding, INTERNAL best transcript NM_006623                  |
| 1,32 | RALYL   | RALY RNA binding protein-like                                                           |

|      |               |                                                                                              |
|------|---------------|----------------------------------------------------------------------------------------------|
| 1,32 | SLC10A1       | Memczak2013 ANTISENSE, CDS, coding, INTERNAL, intronic best transcript NM_003049             |
| 1,32 | MED12         | Memczak2013 ANTISENSE, CDS, coding, INTERNAL best transcript NM_005120                       |
| 1,32 | FILIP1L       | filamin A interacting protein 1-like                                                         |
| 1,32 | LOXHD1        | lipoxygenase homology domains 1                                                              |
| 1,32 | COLCA2        | colorectal cancer associated 2                                                               |
| 1,32 | LINGO4        | leucine rich repeat and Ig domain containing 4                                               |
| 1,32 | PRY2; PRY     | PTPN13-like, Y-linked 2; PTPN13-like, Y-linked                                               |
| 1,32 | CYB561D1      | cytochrome b561 family, member D1                                                            |
| 1,32 | CAPN8         | calpain 8                                                                                    |
| 1,32 | ARPP21        | Transcript Identified by AceView, Entrez Gene ID(s) 10777                                    |
| 1,32 | PRAMEF13      | PRAME family member 13                                                                       |
| 1,32 | CDH18         | cadherin 18, type 2                                                                          |
| 1,32 | CNGA4         | cyclic nucleotide gated channel alpha 4                                                      |
| 1,32 | SYN1          | synapsin I                                                                                   |
| 1,32 | CDH12         | cadherin 12, type 2 (N-cadherin 2)                                                           |
| 1,32 | CHN2          | chimerin 2                                                                                   |
| 1,32 | SGOL2         | shugoshin-like 2 (S. pombe)                                                                  |
| 1,32 | CYP3A5        | cytochrome P450, family 3, subfamily A, polypeptide 5                                        |
| 1,31 | DNASE1L3      | deoxyribonuclease I-like 3                                                                   |
| 1,31 | STKLD1        | serine/threonine kinase-like domain containing 1 [Source:HGNC Symbol;Acc:HGNC:28669]         |
| 1,31 | FAM110D       | family with sequence similarity 110, member D                                                |
| 1,31 | LCE1D         | late cornified envelope 1D                                                                   |
| 1,31 | ART5          | ADP-ribosyltransferase 5                                                                     |
| 1,31 | SOD3          | superoxide dismutase 3, extracellular                                                        |
| 1,31 | GALNT14       | Memczak2013 ALT_ACCEPTOR, ALT_DONOR, INTERNAL, intronic, ncRNA best transcript NR_045602     |
| 1,31 | CD300LF       | CD300 molecule-like family member f                                                          |
| 1,31 | TPSB2; TPSAB1 | tryptase beta 2 (gene/pseudogene); tryptase alpha/beta 1                                     |
| 1,31 | SVEP1         | sushi, von Willebrand factor type A, EGF and pentraxin domain containing 1                   |
| 1,31 | RUFY1         | Transcript Identified by AceView, Entrez Gene ID(s) 80230                                    |
| 1,31 | COL5A3        | collagen, type V, alpha 3                                                                    |
| 1,31 | KRTAP20-1     | keratin associated protein 20-1                                                              |
| 1,31 | MYRF          | myelin regulatory factor                                                                     |
| 1,31 | NPY1R         | neuropeptide Y receptor Y1                                                                   |
| 1,31 | CDC14B        | cell division cycle 14B                                                                      |
| 1,31 | OR4C15        | olfactory receptor, family 4, subfamily C, member 15                                         |
| 1,31 | RBFOX1        | Memczak2013 ALT_ACCEPTOR, ALT_DONOR, coding, INTERNAL, intronic best transcript NM_001142333 |
| 1,31 | ERVMER34-1    | endogenous retrovirus group MER34, member 1                                                  |
| 1,31 | CA1           | carbonic anhydrase I                                                                         |

|      |                     |                                                                                       |
|------|---------------------|---------------------------------------------------------------------------------------|
| 1,31 | CCL26               | chemokine (C-C motif) ligand 26                                                       |
| 1,31 | LINC00452           | long intergenic non-protein coding RNA 452                                            |
| 1,31 | TF                  | transferrin                                                                           |
| 1,31 | BCL6B               | B-cell CLL/lymphoma 6, member B                                                       |
| 1,31 | OTOR                | otoraplin                                                                             |
| 1,31 | ZNF385A             | Memczak2013 ANTISENSE, CDS, coding, INTERNAL best transcript NM_001130967             |
| 1,31 | PTPN6               | protein tyrosine phosphatase, non-receptor type 6                                     |
| 1,31 | MMP1                | matrix metalloproteinase 1                                                            |
| 1,31 | BBOX1               | butyrobetaine (gamma), 2-oxoglutarate dioxygenase (gamma-butyrobetaine hydroxylase) 1 |
| 1,31 | NOVA1               | neuro-oncological ventral antigen 1                                                   |
| 1,31 | RPS25               | ribosomal protein S25                                                                 |
| 1,31 | FAM124A             | family with sequence similarity 124 member A                                          |
| 1,31 | FAM131C             | family with sequence similarity 131, member C                                         |
| 1,31 | CHST11              | Transcript Identified by AceView, Entrez Gene ID(s) 50515                             |
| 1,30 | RFPL1               | ret finger protein-like 1                                                             |
| 1,30 | GCGR                | glucagon receptor                                                                     |
| 1,30 | SPDYA               | speedy/RINGO cell cycle regulator family member A                                     |
| 1,30 | PKHD1L1             | polycystic kidney and hepatic disease 1 (autosomal recessive)-like 1                  |
| 1,30 | GPR45               | G protein-coupled receptor 45                                                         |
| 1,30 | GRM3                | glutamate receptor, metabotropic 3                                                    |
| 1,30 | ABCD3               | Transcript Identified by AceView, Entrez Gene ID(s) 5825                              |
| 1,30 | CD3E                | CD3e molecule, epsilon (CD3-TCR complex)                                              |
| 1,30 | MAGEB3              | MAGE family member B3                                                                 |
| 1,30 | GMFG                | glia maturation factor, gamma                                                         |
| 1,30 | KDM4C               | Transcript Identified by AceView, Entrez Gene ID(s) 23081                             |
| 1,30 | NALCN               | sodium leak channel, non selective                                                    |
| 1,30 | NXF1                | nuclear RNA export factor 1                                                           |
| 1,30 | EGF                 | epidermal growth factor                                                               |
| 1,30 | TRMT2A              | Memczak2013 ANTISENSE, CDS, coding, INTERNAL, UTR3 best transcript NM_022727          |
| 1,30 | ENTHD1              | ENTH domain containing 1                                                              |
| 1,30 | RIMBP3C;<br>RIMBP3B | RIMS binding protein 3C; RIMS binding protein 3B                                      |
| 1,30 | FRMD4A              | FERM domain containing 4A                                                             |
| 1,30 | MUC12               | mucin 12, cell surface associated                                                     |
| 1,30 | ZFPM1               | zinc finger protein, FOG family member 1                                              |
| 1,30 | BMP4                | bone morphogenetic protein 4                                                          |
| 1,30 | NUTM2F              | NUT family member 2F                                                                  |
| 1,30 | GRM7                | glutamate receptor, metabotropic 7                                                    |
| 1,30 | OR5D14              | olfactory receptor, family 5, subfamily D, member 14                                  |
| 1,30 | LAP3                | Transcript Identified by AceView, Entrez Gene ID(s) 51056                             |
| 1,29 | IL17A               | interleukin 17A                                                                       |

|      |                  |                                                                                                                                |
|------|------------------|--------------------------------------------------------------------------------------------------------------------------------|
| 1,29 | MYO9B            | Memczak2013 ANTISENSE, CDS, coding, INTERNAL best transcript NM_004145                                                         |
| 1,29 | DNAJC28          | DnaJ (Hsp40) homolog, subfamily C, member 28                                                                                   |
| 1,29 | PADI1            | peptidyl arginine deiminase, type I                                                                                            |
| 1,29 | C1QTNF3          | C1q and tumor necrosis factor related protein 3                                                                                |
| 1,29 | LRRN4CL          | LRRN4 C-terminal like                                                                                                          |
| 1,29 | TAF1C            | TATA box binding protein (TBP)-associated factor, RNA polymerase I, C, 110kDa                                                  |
| 1,29 | SERHL2           | serine hydrolase-like 2                                                                                                        |
| 1,29 | TMEM140          | transmembrane protein 140                                                                                                      |
| 1,29 | CYP26C1          | cytochrome P450, family 26, subfamily C, polypeptide 1                                                                         |
| 1,29 | FNDC7            | fibronectin type III domain containing 7                                                                                       |
| 1,29 | INHBA            | inhibin beta A                                                                                                                 |
| 1,29 | PTGES            | prostaglandin E synthase                                                                                                       |
| 1,29 | TMEM236          | transmembrane protein 236                                                                                                      |
| 1,29 | IQSEC3           | IQ motif and Sec7 domain 3                                                                                                     |
| 1,29 | CCDC85A          | coiled-coil domain containing 85A                                                                                              |
| 1,29 | PCYT1B           | phosphate cytidyltransferase 1, choline, beta                                                                                  |
| 1,29 | CEP85L           | centrosomal protein 85kDa-like                                                                                                 |
| 1,29 | LRCH4            | leucine-rich repeats and calponin homology (CH) domain containing 4                                                            |
| 1,29 | FMN1             | formin 1                                                                                                                       |
| 1,29 | OLFML3           | olfactomedin like 3                                                                                                            |
| 1,29 | C3orf33          | chromosome 3 open reading frame 33                                                                                             |
| 1,29 | ZDHHC3           | zinc finger, DHHC-type containing 3                                                                                            |
| 1,29 | MSH6             | mutS homolog 6                                                                                                                 |
| 1,29 | DEFB136          | defensin, beta 136                                                                                                             |
| 1,29 | RAB25            | RAB25, member RAS oncogene family                                                                                              |
| 1,29 | USP45            | ubiquitin specific peptidase 45                                                                                                |
| 1,29 | CABLES2          | Cdk5 and Abl enzyme substrate 2                                                                                                |
| 1,29 | HOXA1            | homeobox A1                                                                                                                    |
| 1,29 | TRPS1            | Transcript Identified by AceView, Entrez Gene ID(s) 7227                                                                       |
| 1,29 | KCNMA1;<br>swamu | Jeck2013 ALT_ACCEPTOR, ALT_DONOR, coding, INTERNAL, intronic best transcript NM_001014797;<br>Transcript Identified by AceView |
| 1,28 | SPINT4           | serine peptidase inhibitor, Kunitz type 4                                                                                      |
| 1,28 | HLA-DQB1         | major histocompatibility complex, class II, DQ beta 1                                                                          |
| 1,28 | NID2             | nidogen 2 (osteonidogen)                                                                                                       |
| 1,28 | AVPR2            | arginine vasopressin receptor 2                                                                                                |
| 1,28 | GALC             | galactosylceramidase                                                                                                           |
| 1,28 | UGT3A2           | UDP glycosyltransferase 3 family, polypeptide A2                                                                               |
| 1,28 | RIBC1            | RIB43A domain with coiled-coils 1                                                                                              |
| 1,28 | FAM196B          | family with sequence similarity 196, member B                                                                                  |
| 1,28 | VSNL1            | visinin like 1                                                                                                                 |
| 1,28 | PLGLB1           | Transcript Identified by AceView, Entrez Gene ID(s) 285074; 5343                                                               |
| 1,28 | HPGDS            | hematopoietic prostaglandin D synthase                                                                                         |
| 1,28 | SGK2             | serum/glucocorticoid regulated kinase 2                                                                                        |

|      |                                         |                                                                                                                                             |
|------|-----------------------------------------|---------------------------------------------------------------------------------------------------------------------------------------------|
| 1,28 | ACSM5                                   | acyl-CoA synthetase medium-chain family member 5                                                                                            |
| 1,28 | CDH9                                    | cadherin 9, type 2 (T1-cadherin)                                                                                                            |
| 1,28 | MORN4                                   | MORN repeat containing 4                                                                                                                    |
| 1,28 | LRRC37A5P                               | leucine rich repeat containing 37, member A5, pseudogene                                                                                    |
| 1,28 | RNF39                                   | ring finger protein 39                                                                                                                      |
| 1,28 | CBL                                     | Memczak2013 ANTISENSE, coding, INTERNAL, UTR3 best transcript NM_005188                                                                     |
| 1,28 | SPATA31A5;<br>SPATA31A7                 | SPATA31 subfamily A, member 5; SPATA31 subfamily A, member 7                                                                                |
| 1,28 | NRXN3                                   | neurexin 3                                                                                                                                  |
| 1,28 | S100A7A                                 | S100 calcium binding protein A7A                                                                                                            |
| 1,28 | LOC100506142;<br>RP11-417F21.1;<br>RHOQ | uncharacterized LOC100506142; Memczak2013 ANTISENSE, coding, INTERNAL, intronic best transcript NM_012249; novel transcript                 |
| 1,28 | VPS16                                   | vacuolar protein sorting 16 homolog ( <i>S. cerevisiae</i> )                                                                                |
| 1,28 | DKK1                                    | dickkopf WNT signaling pathway inhibitor 1                                                                                                  |
| 1,28 | C7orf69                                 | chromosome 7 open reading frame 69                                                                                                          |
| 1,28 | PKMYT1                                  | Transcript Identified by AceView, Entrez Gene ID(s) 9088                                                                                    |
| 1,28 | CLASP2                                  | Transcript Identified by AceView, Entrez Gene ID(s) 23122                                                                                   |
| 1,28 | SEMA5A                                  | sema domain, seven thrombospondin repeats (type 1 and type 1-like), transmembrane domain (TM) and short cytoplasmic domain, (semaphorin) 5A |
| 1,28 | SLC25A26                                | solute carrier family 25 (S-adenosylmethionine carrier), member 26                                                                          |
| 1,28 | SPICE1                                  | spindle and centriole associated protein 1                                                                                                  |
| 1,28 | IGSF9                                   | immunoglobulin superfamily, member 9                                                                                                        |
| 1,28 | CDH22                                   | Transcript Identified by AceView, Entrez Gene ID(s) 64405                                                                                   |
| 1,28 | LINC00311                               | long intergenic non-protein coding RNA 311                                                                                                  |
| 1,27 | VCY1B                                   | variable charge, Y-linked 1B                                                                                                                |
| 1,27 | FAM162B                                 | family with sequence similarity 162, member B                                                                                               |
| 1,27 | ATP13A5-AS1                             | ATP13A5 antisense RNA 1                                                                                                                     |
| 1,27 | SPDEF                                   | SAM pointed domain containing ETS transcription factor                                                                                      |
| 1,27 | ALAD                                    | aminolevulinate dehydratase                                                                                                                 |
| 1,27 | LYRM5                                   | Memczak2013 ANTISENSE, coding, INTERNAL, intronic best transcript NM_001001660                                                              |
| 1,27 | DUX5                                    | double homeobox 5                                                                                                                           |
| 1,27 | POU4F2                                  | POU class 4 homeobox 2                                                                                                                      |
| 1,27 | NFASC                                   | neurofascin                                                                                                                                 |
| 1,27 | XPA                                     | xeroderma pigmentosum, complementation group A                                                                                              |
| 1,27 | ALKBH6                                  | alkB homolog 6                                                                                                                              |
| 1,27 | MSL3                                    | male-specific lethal 3 homolog ( <i>Drosophila</i> )                                                                                        |
| 1,27 | CUL2; RP11-297A16.2                     | Transcript Identified by AceView, Entrez Gene ID(s) 8453; novel transcript                                                                  |
| 1,27 | ARMC3                                   | armadillo repeat containing 3                                                                                                               |
| 1,27 | PRSS45                                  | protease, serine 45                                                                                                                         |

|      |                |                                                                                               |
|------|----------------|-----------------------------------------------------------------------------------------------|
| 1,27 | CYP46A1        | cytochrome P450, family 46, subfamily A, polypeptide 1                                        |
| 1,27 | B3GAT1         | beta-1,3-glucuronyltransferase 1                                                              |
| 1,27 | FETUB          | fetuin B                                                                                      |
| 1,27 | GSX1           | GS homeobox 1                                                                                 |
| 1,27 | INPP5D         | inositol polyphosphate-5-phosphatase D                                                        |
| 1,27 | CDO1           | cysteine dioxygenase type 1                                                                   |
| 1,27 | THSD4          | Transcript Identified by AceView, Entrez Gene ID(s) 79875                                     |
| 1,27 | GPSM1          | G-protein signaling modulator 1                                                               |
| 1,27 | GATM           | glycine amidinotransferase (L-arginine:glycine amidinotransferase)                            |
| 1,27 | OR2A4          | olfactory receptor, family 2, subfamily A, member 4                                           |
| 1,27 | C1orf189       | chromosome 1 open reading frame 189                                                           |
| 1,27 | ASPDH          | aspartate dehydrogenase domain containing                                                     |
| 1,27 | OVCH2          | ovochymase 2 (gene/pseudogene)                                                                |
| 1,27 | UBA7           | Memczak2013 ANTISENSE, coding, INTERNAL, intronic best transcript NM_003335                   |
| 1,27 | SNX32          | sorting nexin 32                                                                              |
| 1,27 | LINC00550      | long intergenic non-protein coding RNA 550                                                    |
| 1,27 | CARHSP1        | Jeck2013 ANTISENSE, CDS, coding, INTERNAL, OVCODE, OVEXON best transcript NM_001042476        |
| 1,27 | CEACAM1        | carcinoembryonic antigen-related cell adhesion molecule 1 (biliary glycoprotein)              |
| 1,27 | PCDHB5         | protocadherin beta 5                                                                          |
| 1,27 | BCL7A          | B-cell CLL/lymphoma 7A                                                                        |
| 1,27 | IL6R           | interleukin 6 receptor                                                                        |
| 1,27 | TJP2           | tight junction protein 2                                                                      |
| 1,27 | KAT8           | K(lysine) acetyltransferase 8                                                                 |
| 1,27 | NXF2B; TCP11X2 | nuclear RNA export factor 2B; t-complex 11 family, X-linked 2                                 |
| 1,27 | SIX3           | SIX homeobox 3                                                                                |
| 1,27 | CXCL1          | chemokine (C-X-C motif) ligand 1 (melanoma growth stimulating activity, alpha)                |
| 1,27 | BRSK1          | BR serine/threonine kinase 1                                                                  |
| 1,27 | OR2G3          | olfactory receptor, family 2, subfamily G, member 3                                           |
| 1,27 | IQCD           | IQ motif containing D                                                                         |
| 1,27 | EVA1A          | eva-1 homolog A (C. elegans)                                                                  |
| 1,27 | ARHGAP10       | Transcript Identified by AceView, Entrez Gene ID(s) 79658                                     |
| 1,26 | PRB4           | proline-rich protein BstNI subfamily 4                                                        |
| 1,26 | TGFA           | transforming growth factor alpha                                                              |
| 1,26 | BCL2L15        | BCL2-like 15                                                                                  |
| 1,26 | AGBL3          | ATP/GTP binding protein-like 3                                                                |
| 1,26 | ACY3           | aminoacylase 3                                                                                |
| 1,26 | CCBE1          | collagen and calcium binding EGF domains 1                                                    |
| 1,26 | NRIP2          | nuclear receptor interacting protein 2                                                        |
| 1,26 | PDZD9          | PDZ domain containing 9                                                                       |
| 1,26 | PAK6; BUB1B    | p21 protein (Cdc42/Rac)-activated kinase 6; BUB1 mitotic checkpoint serine/threonine kinase B |

|      |                             |                                                                                                                              |
|------|-----------------------------|------------------------------------------------------------------------------------------------------------------------------|
| 1,26 | INMT                        | indolethylamine N-methyltransferase                                                                                          |
| 1,26 | NCF1                        | neutrophil cytosolic factor 1                                                                                                |
| 1,26 | ARHGEF35                    | Rho guanine nucleotide exchange factor 35                                                                                    |
| 1,26 | LANCL3                      | LanC lantibiotic synthetase component C-like 3 (bacterial)                                                                   |
| 1,26 | KCNJ15                      | potassium channel, inwardly rectifying subfamily J, member 15                                                                |
| 1,26 | HIST1H4C                    | Jeck2013 ANTISENSE, CDS, coding, INTERNAL, OVCODE, OVEXON, UTR3 best transcript NM_003542                                    |
| 1,26 | UROCI                       | urocanate hydratase 1                                                                                                        |
| 1,26 | NXPH1                       | neurexophilin 1                                                                                                              |
| 1,26 | CLIP3                       | CAP-GLY domain containing linker protein 3                                                                                   |
| 1,26 | PYDC1                       | PYD (pyrin domain) containing 1                                                                                              |
| 1,26 | ARHGAP20                    | Rho GTPase activating protein 20                                                                                             |
| 1,26 | TAS2R39                     | taste receptor, type 2, member 39                                                                                            |
| 1,26 | MAF                         | v-maf avian musculoaponeurotic fibrosarcoma oncogene homolog                                                                 |
| 1,26 | FAM72D                      | Transcript Identified by AceView, Entrez Gene ID(s) 728833                                                                   |
| 1,26 | PRYP3                       | PTPN13-like, Y-linked pseudogene 3                                                                                           |
| 1,26 | C15orf56                    | chromosome 15 open reading frame 56                                                                                          |
| 1,26 | ESRRG                       | estrogen-related receptor gamma                                                                                              |
| 1,26 | DDX60L                      | DEAD (Asp-Glu-Ala-Asp) box polypeptide 60-like                                                                               |
| 1,26 | TUBA1C                      | tubulin, alpha 1c                                                                                                            |
| 1,26 | CXorf66                     | chromosome X open reading frame 66                                                                                           |
| 1,26 | MRGPRE                      | MAS-related GPR, member E                                                                                                    |
| 1,26 | XKR5                        | X-linked Kx blood group related 5                                                                                            |
| 1,26 | C7orf62                     | chromosome 7 open reading frame 62                                                                                           |
| 1,26 | ANKRD61                     | ankyrin repeat domain 61                                                                                                     |
| 1,26 | VPS8                        | Transcript Identified by AceView, Entrez Gene ID(s) 23355                                                                    |
| 1,26 | SCG3                        | secretogranin III                                                                                                            |
| 1,26 | SHANK2-AS3                  | SHANK2 antisense RNA 3                                                                                                       |
| 1,26 | CCDC160                     | coiled-coil domain containing 160                                                                                            |
| 1,26 | TAS1R3                      | taste receptor, type 1, member 3                                                                                             |
| 1,26 | PRSS54                      | protease, serine, 54                                                                                                         |
| 1,26 | FBLL1                       | fibrillarin-like 1                                                                                                           |
| 1,26 | BLNK                        | B-cell linker                                                                                                                |
| 1,26 | F2                          | coagulation factor II (thrombin)                                                                                             |
| 1,26 | L3MBTL4                     | l(3)mbt-like 4 (Drosophila)                                                                                                  |
| 1,26 | INMT; FAM188B; INMT-FAM188B | indolethylamine N-methyltransferase; family with sequence similarity 188, member B; INMT-FAM188B readthrough (NMD candidate) |
| 1,26 | BSPRY                       | B-box and SPRY domain containing                                                                                             |
| 1,26 | GAGE12I; GAGE12F            | G antigen 12I; G antigen 12F                                                                                                 |
| 1,26 | FOXO1                       | Memczak2013 ALT_ACCEPTOR, ALT_DONOR, coding, INTERNAL, intronic best transcript NM_002015                                    |

|      |                        |                                                                                                       |
|------|------------------------|-------------------------------------------------------------------------------------------------------|
| 1,26 | NT5M                   | 5,3-nucleotidase, mitochondrial                                                                       |
| 1,26 | OR6N1                  | olfactory receptor, family 6, subfamily N, member 1                                                   |
| 1,26 | PSMC6                  | Memczak2013 ALT_ACCEPTOR, ALT_DONOR, coding, INTERNAL, intronic best transcript NM_002806             |
| 1,26 | PASK                   | PAS domain containing serine/threonine kinase                                                         |
| 1,26 | BCAS3                  | breast carcinoma amplified sequence 3                                                                 |
| 1,26 | ACTR5                  | ARP5 actin-related protein 5 homolog (yeast)                                                          |
| 1,26 | SECTM1                 | secreted and transmembrane 1                                                                          |
| 1,26 | SPEF1                  | sperm flagellar 1                                                                                     |
| 1,26 | ALG13                  | Transcript Identified by AceView, Entrez Gene ID(s) 79868                                             |
| 1,26 | CCDC85C                | coiled-coil domain containing 85C                                                                     |
| 1,26 | ABCA4                  | ATP binding cassette subfamily A member 4                                                             |
| 1,25 | OR2D3                  | olfactory receptor, family 2, subfamily D, member 3                                                   |
| 1,25 | FLJ22763; RP11-59E19.1 | uncharacterized LOC401081; uncharacterized LOC401081 [Source:EntrezGene;Acc:401081]; novel transcript |
| 1,25 | TLR5                   | toll-like receptor 5                                                                                  |
| 1,25 | RGS18                  | regulator of G-protein signaling 18                                                                   |
| 1,25 | SPRY1                  | sprouty RTK signaling antagonist 1                                                                    |
| 1,25 | ATAT1                  | alpha tubulin acetyltransferase 1                                                                     |
| 1,25 | OR2A25                 | olfactory receptor, family 2, subfamily A, member 25                                                  |
| 1,25 | GPR15                  | G protein-coupled receptor 15                                                                         |
| 1,25 | VPS11                  | VPS11, CORVET/HOPS core subunit [Source:HGNC Symbol;Acc:HGNC:14583]                                   |
| 1,25 | VWCE                   | von Willebrand factor C and EGF domains                                                               |
| 1,25 | LYPD6B                 | LY6/PLAUR domain containing 6B                                                                        |
| 1,25 | GPBAR1                 | G protein-coupled bile acid receptor 1                                                                |
| 1,25 | LINC00649              | long intergenic non-protein coding RNA 649                                                            |
| 1,25 | AIM2                   | absent in melanoma 2                                                                                  |
| 1,25 | OR2AG2                 | olfactory receptor, family 2, subfamily AG, member 2                                                  |
| 1,25 | EBI3                   | Epstein-Barr virus induced 3                                                                          |
| 1,25 | STIM2                  | stromal interaction molecule 2                                                                        |
| 1,25 | ACTN2                  | actinin, alpha 2                                                                                      |
| 1,25 | ARL4A                  | ADP-ribosylation factor like GTPase 4A                                                                |
| 1,25 | LAD1                   | ladinin 1                                                                                             |
| 1,25 | LTC4S                  | leukotriene C4 synthase                                                                               |
| 1,25 | MPZ                    | myelin protein zero                                                                                   |
| 1,25 | ARL4D                  | ADP-ribosylation factor like GTPase 4D                                                                |
| 1,25 | NPM2                   | nucleophosmin/nucleoplasmin 2                                                                         |
| 1,25 | A1CF                   | APOBEC1 complementation factor                                                                        |
| 1,25 | CCER1                  | coiled-coil glutamate rich protein 1                                                                  |
| 1,25 | ZNF335                 | zinc finger protein 335                                                                               |
| 1,25 | TMEM177                | transmembrane protein 177                                                                             |
| 1,25 | PRRG4                  | proline rich Gla (G-carboxyglutamic acid) 4 (transmembrane)                                           |
| 1,25 | COLEC11                | collectin subfamily member 11                                                                         |
| 1,25 | ANKRD42                | ankyrin repeat domain 42                                                                              |

|      |          |                                                                                           |
|------|----------|-------------------------------------------------------------------------------------------|
| 1,25 | ELF5     | E74-like factor 5 (ets domain transcription factor)                                       |
| 1,25 | PDE11A   | phosphodiesterase 11A                                                                     |
| 1,25 | WIPF2    | WAS/WASL interacting protein family, member 2                                             |
| 1,25 | ELMO1    | engulfment and cell motility 1                                                            |
| 1,25 | CP       | ceruloplasmin (ferroxidase)                                                               |
| 1,25 | SCN8A    | sodium channel, voltage gated, type VIII alpha subunit                                    |
| 1,25 | ADGRB1   | adhesion G protein-coupled receptor B1                                                    |
| 1,25 | ILDR1    | immunoglobulin-like domain containing receptor 1                                          |
| 1,25 | MRGPRX4  | MAS-related GPR, member X4                                                                |
| 1,25 | IRS1     | insulin receptor substrate 1                                                              |
| 1,25 | GALNTL5  | polypeptide N-acetylgalactosaminyltransferase-like 5                                      |
| 1,25 | SLC9B2   | solute carrier family 9, subfamily B (NHA2, cation proton antiporter 2), member 2         |
| 1,25 | HCRP1    | Transcript Identified by AceView, Entrez Gene ID(s) 387535                                |
| 1,25 | SPTSSB   | serine palmitoyltransferase, small subunit B                                              |
| 1,25 | RBMS1    | Memczak2013 ALT_ACCEPTOR, ALT_DONOR, coding, INTERNAL, intronic best transcript NM_016836 |
| 1,25 | C2orf61  | chromosome 2 open reading frame 61                                                        |
| 1,25 | TLR10    | toll-like receptor 10                                                                     |
| 1,25 | TNS1     | tensin 1                                                                                  |
| 1,24 | RASSF9   | Ras association (RalGDS/AF-6) domain family (N-terminal) member 9                         |
| 1,24 | ATG16L1  | autophagy related 16-like 1                                                               |
| 1,24 | SYTL4    | synaptotagmin-like 4                                                                      |
| 1,24 | ATXN1    | Memczak2013 ALT_ACCEPTOR, ALT_DONOR, coding, INTERNAL, intronic best transcript NM_000332 |
| 1,24 | CFAP99   | cilia and flagella associated protein 99                                                  |
| 1,24 | CA8      | carbonic anhydrase VIII                                                                   |
| 1,24 | ATP11AUN | ATP11A upstream neighbor                                                                  |
| 1,24 | NHSL2    | NHS-like 2                                                                                |
| 1,24 | BEX1     | brain expressed X-linked 1                                                                |
| 1,24 | GALNT18  | polypeptide N-acetylgalactosaminyltransferase 18                                          |
| 1,24 | SLC1A2   | solute carrier family 1 (glial high affinity glutamate transporter), member 2             |
| 1,24 | POGZ     | Transcript Identified by AceView, Entrez Gene ID(s) 23126                                 |
| 1,24 | DACH1    | dachshund family transcription factor 1                                                   |
| 1,24 | MYLK4    | myosin light chain kinase family member 4                                                 |
| 1,24 | LILRA4   | leukocyte immunoglobulin-like receptor, subfamily A (with TM domain), member 4            |
| 1,24 | KCNIP4   | Kv channel interacting protein 4                                                          |
| 1,24 | PIGL     | phosphatidylinositol glycan anchor biosynthesis class L                                   |
| 1,24 | KCNE1    | potassium channel, voltage gated subfamily E regulatory beta subunit 1                    |
| 1,24 | NELL1    | neural EGFL like 1                                                                        |
| 1,24 | DSG3     | desmoglein 3                                                                              |

|      |                                          |                                                                                                                                                                                            |
|------|------------------------------------------|--------------------------------------------------------------------------------------------------------------------------------------------------------------------------------------------|
| 1,24 | TMEM143                                  | transmembrane protein 143                                                                                                                                                                  |
| 1,24 | CDNF                                     | cerebral dopamine neurotrophic factor                                                                                                                                                      |
| 1,24 | CDY2B; CDY2A                             | chromodomain protein, Y-linked, 2B; chromodomain protein, Y-linked, 2A                                                                                                                     |
| 1,24 | FAM65A                                   | Memczak2013 ALT_ACCEPTOR, ALT_DONOR, coding, INTERNAL, intronic best transcript NM_001193522                                                                                               |
| 1,24 | PPP1R12C                                 | Memczak2013 ANTISENSE, CDS, coding, INTERNAL best transcript NM_017607                                                                                                                     |
| 1,24 | CATSPER2                                 | cation channel, sperm associated 2                                                                                                                                                         |
| 1,24 | CACNA1A                                  | calcium channel, voltage-dependent, P/Q type, alpha 1A subunit                                                                                                                             |
| 1,24 | IRS2                                     | Transcript Identified by AceView, Entrez Gene ID(s) 8660                                                                                                                                   |
| 1,24 | TRPM6                                    | transient receptor potential cation channel, subfamily M, member 6                                                                                                                         |
| 1,24 | LMNB2                                    | Zhang2013 ALT_ACCEPTOR, ALT_DONOR, coding, INTERNAL, intronic best transcript NM_032737                                                                                                    |
| 1,24 | GPSM3                                    | G-protein signaling modulator 3                                                                                                                                                            |
| 1,24 | PPP3CC                                   | protein phosphatase 3, catalytic subunit, gamma isozyme                                                                                                                                    |
| 1,24 | PIK3C2B                                  | Transcript Identified by AceView, Entrez Gene ID(s) 5287                                                                                                                                   |
| 1,24 | FAT3                                     | FAT atypical cadherin 3                                                                                                                                                                    |
| 1,24 | SOX1                                     | SRY box 1                                                                                                                                                                                  |
| 1,24 | PLK3                                     | polo-like kinase 3                                                                                                                                                                         |
| 1,24 | MMP13                                    | matrix metalloproteinase 13                                                                                                                                                                |
| 1,24 | PLAC8                                    | placenta specific 8                                                                                                                                                                        |
| 1,24 | FCGR2B                                   | Fc fragment of IgG, low affinity IIb, receptor (CD32)                                                                                                                                      |
| 1,24 | GIMAP1-GIMAP5; GIMAP5; GIMAP1            | GIMAP1-GIMAP5 readthrough; GTPase, IMAP family member 5; GTPase, IMAP family member 1                                                                                                      |
| 1,24 | JAK2                                     | Janus kinase 2                                                                                                                                                                             |
| 1,24 | BHLHA9                                   | basic helix-loop-helix family, member a9                                                                                                                                                   |
| 1,24 | TTLL9                                    | tubulin tyrosine ligase-like family member 9                                                                                                                                               |
| 1,24 | LINC00173                                | long intergenic non-protein coding RNA 173                                                                                                                                                 |
| 1,24 | ARMC2                                    | Memczak2013 ANTISENSE, coding, INTERNAL, intronic best transcript NM_032131                                                                                                                |
| 1,24 | ERP27                                    | endoplasmic reticulum protein 27                                                                                                                                                           |
| 1,24 | TXNDC8                                   | thioredoxin domain containing 8 (spermatzoa)                                                                                                                                               |
| 1,24 | RTL1                                     | retrotransposon-like 1                                                                                                                                                                     |
| 1,24 | ARID1B                                   | Memczak2013 ANTISENSE, CDS, coding, INTERNAL best transcript NM_017519                                                                                                                     |
| 1,24 | LOC105377348; RP11-10L12.4; UBE2D3; pugo | uncharacterized LOC105377348; Salzman2013 ANTISENSE, coding, INTERNAL, intronic, OVERLAPTX best transcript NM_181890; novel transcript, antisense UBE2D3; Transcript Identified by AceView |
| 1,24 | RBBP8NL                                  | RBBP8 N-terminal like                                                                                                                                                                      |

|      |           |                                                                                           |
|------|-----------|-------------------------------------------------------------------------------------------|
| 1,24 | RALY      | Jeck2013 ALT_DONOR, coding, INTERNAL, intronic best transcript NM_016732                  |
| 1,24 | ZBTB45    | Memczak2013 ALT_ACCEPTOR, ALT_DONOR, coding, INTERNAL, intronic best transcript NM_032792 |
| 1,24 | PSG1      | pregnancy specific beta-1-glycoprotein 1                                                  |
| 1,24 | RPS6KA1   | ribosomal protein S6 kinase, 90kDa, polypeptide 1                                         |
| 1,24 | RHBDD1    | rhomboid domain containing 1                                                              |
| 1,24 | TTC9B     | tetratricopeptide repeat domain 9B                                                        |
| 1,24 | SRP72     | Memczak2013 ANTISENSE, coding, INTERNAL, intronic best transcript NM_006947               |
| 1,24 | HKR1      | HKR1, GLI-Kruppel zinc finger family member                                               |
| 1,24 | TRIM59    | tripartite motif containing 59                                                            |
| 1,24 | GPRASP2   | G protein-coupled receptor associated sorting protein 2                                   |
| 1,24 | SOX14     | SRY box 14                                                                                |
| 1,24 | SESN3     | Transcript Identified by AceView, Entrez Gene ID(s) 143686                                |
| 1,24 | ACE       | angiotensin I converting enzyme                                                           |
| 1,24 | HKR1      | HKR1, GLI-Kruppel zinc finger family member                                               |
| 1,23 | USP17L7   | ubiquitin specific peptidase 17-like family member 7                                      |
| 1,23 | XAGE5     | X antigen family, member 5                                                                |
| 1,23 | SRM       | spermidine synthase                                                                       |
| 1,23 | WDR31     | WD repeat domain 31                                                                       |
| 1,23 | FMN1      | Transcript Identified by AceView, Entrez Gene ID(s) 342184                                |
| 1,23 | C1QL2     | complement component 1, q subcomponent-like 2                                             |
| 1,23 | P4HA2     | prolyl 4-hydroxylase, alpha polypeptide II                                                |
| 1,23 | HERC6     | Memczak2013 ANTISENSE, coding, INTERNAL, intronic best transcript NM_001165136            |
| 1,23 | OPRK1     | opioid receptor, kappa 1                                                                  |
| 1,23 | HCG22     | HLA complex group 22                                                                      |
| 1,23 | CLEC1A    | C-type lectin domain family 1, member A                                                   |
| 1,23 | RFPL3S    | RFPL3 antisense                                                                           |
| 1,23 | SIRPG     | signal-regulatory protein gamma                                                           |
| 1,23 | MT4       | metallothionein 4                                                                         |
| 1,23 | ZNF780A   | zinc finger protein 780A                                                                  |
| 1,23 | GOLGA8N   | golgin A8 family, member N                                                                |
| 1,23 | SMCO3     | single-pass membrane protein with coiled-coil domains 3                                   |
| 1,23 | MYOC      | myocilin, trabecular meshwork inducible glucocorticoid response                           |
| 1,23 | KRTAP27-1 | keratin associated protein 27-1                                                           |
| 1,23 | KBTBD8    | kelch repeat and BTB (POZ) domain containing 8                                            |
| 1,23 | LMLN      | leishmanolysin-like (metallopeptidase M8 family)                                          |
| 1,23 | POU5F1B   | POU class 5 homeobox 1B                                                                   |
| 1,23 | LEKR1     | leucine, glutamate and lysine rich 1                                                      |
| 1,23 | BPGM      | Transcript Identified by AceView, Entrez Gene ID(s) 669                                   |
| 1,23 | CFHR2     | complement factor H-related 2                                                             |

|      |                               |                                                                                                                                                                                                     |
|------|-------------------------------|-----------------------------------------------------------------------------------------------------------------------------------------------------------------------------------------------------|
| 1,23 | SELP                          | selectin P (granule membrane protein 140kDa, antigen CD62)                                                                                                                                          |
| 1,23 | TMPRSS11E                     | transmembrane protease, serine 11E                                                                                                                                                                  |
| 1,23 | IAPP                          | islet amyloid polypeptide                                                                                                                                                                           |
| 1,23 | SHOX                          | short stature homeobox                                                                                                                                                                              |
| 1,23 | OR10S1                        | olfactory receptor, family 10, subfamily S, member 1                                                                                                                                                |
| 1,23 | ABCA6                         | ATP binding cassette subfamily A member 6                                                                                                                                                           |
| 1,23 | ZNF506                        | zinc finger protein 506                                                                                                                                                                             |
| 1,23 | TNFSF11                       | tumor necrosis factor (ligand) superfamily, member 11                                                                                                                                               |
| 1,23 | C6orf163                      | chromosome 6 open reading frame 163                                                                                                                                                                 |
| 1,23 | OPN4                          | opsin 4                                                                                                                                                                                             |
| 1,23 | FIGF                          | c-fos induced growth factor (vascular endothelial growth factor D)                                                                                                                                  |
| 1,23 | KANK3                         | KN motif and ankyrin repeat domains 3                                                                                                                                                               |
| 1,23 | KRAS                          | Memczak2013 ANTISENSE, coding, INTERNAL, intronic best transcript NM_033360                                                                                                                         |
| 1,23 | BAHCC1                        | BAH domain and coiled-coil containing 1                                                                                                                                                             |
| 1,23 | PAPL                          | iron/zinc purple acid phosphatase-like protein; Iron/zinc purple acid phosphatase-like protein [Source:UniProtKB/Swiss-Prot;Acc:Q6ZNF0]; Transcript Identified by AceView, Entrez Gene ID(s) 390928 |
| 1,23 | TTC5                          | tetratricopeptide repeat domain 5                                                                                                                                                                   |
| 1,23 | SPATA12                       | spermatogenesis associated 12                                                                                                                                                                       |
| 1,23 | ESRP2; MIR6773                | epithelial splicing regulatory protein 2; microRNA 6773                                                                                                                                             |
| 1,23 | CRISP3                        | cysteine-rich secretory protein 3                                                                                                                                                                   |
| 1,23 | NUTM1                         | NUT midline carcinoma, family member 1                                                                                                                                                              |
| 1,23 | SLC9A2                        | solute carrier family 9, subfamily A (NHE2, cation proton antiporter 2), member 2                                                                                                                   |
| 1,23 | OR12D1                        | olfactory receptor, family 12, subfamily D, member 1 (gene/pseudogene) [Source:HGNC Symbol;Acc:HGNC:8177]                                                                                           |
| 1,23 | TMBIM1; MIR6513               | transmembrane BAX inhibitor motif containing 1; microRNA 6513                                                                                                                                       |
| 1,23 | MYBPC1                        | myosin binding protein C, slow type                                                                                                                                                                 |
| 1,23 | GPOR1                         | G protein-coupled estrogen receptor 1                                                                                                                                                               |
| 1,23 | ZNF225                        | zinc finger protein 225                                                                                                                                                                             |
| 1,23 | FOXG1                         | forkhead box G1                                                                                                                                                                                     |
| 1,23 | RAB4B; MIA-RAB4B; RAB4B-EGLN2 | RAB4B, member RAS oncogene family; MIA-RAB4B readthrough (NMD candidate); RAB4B-EGLN2 readthrough (NMD candidate)                                                                                   |
| 1,23 | TEX36                         | testis expressed 36                                                                                                                                                                                 |
| 1,23 | CST8                          | cystatin 8 (cystatin-related epididymal specific)                                                                                                                                                   |
| 1,23 | KIAA1033                      | Memczak2013 ALT_ACCEPTOR, ALT_DONOR, coding, INTERNAL, intronic best transcript NM_015275                                                                                                           |
| 1,23 | ZNF780A                       | zinc finger protein 780A                                                                                                                                                                            |
| 1,23 | ALS2CR11                      | amyotrophic lateral sclerosis 2 chromosome region candidate 11                                                                                                                                      |

|      |                                          |                                                                                                                           |
|------|------------------------------------------|---------------------------------------------------------------------------------------------------------------------------|
| 1,23 | ZNF215                                   | zinc finger protein 215                                                                                                   |
| 1,23 | GK                                       | glycerol kinase                                                                                                           |
| 1,23 | ZNF71                                    | zinc finger protein 71                                                                                                    |
| 1,23 | ZPLD1                                    | zona pellucida-like domain containing 1                                                                                   |
| 1,23 | GPR160                                   | G protein-coupled receptor 160                                                                                            |
| 1,23 | USP24                                    | Transcript Identified by AceView, Entrez Gene ID(s)<br>23358                                                              |
| 1,23 | LOC79999;<br>LOC388436;<br>RP11-744A16.4 | uncharacterized LOC79999; Homo sapiens<br>uncharacterized protein ENSP00000382042<br>(LOC388436), mRNA.; novel transcript |
| 1,23 | DGKK                                     | diacylglycerol kinase, kappa                                                                                              |
| 1,23 | C7orf31                                  | chromosome 7 open reading frame 31                                                                                        |
| 1,23 | PLEKHA8P1                                | pleckstrin homology domain containing, family A<br>member 8 pseudogene 1                                                  |
| 1,23 | CLEC4M                                   | C-type lectin domain family 4, member M                                                                                   |
| 1,23 | NFE4                                     | nuclear factor, erythroid 4                                                                                               |
| 1,23 | C1QTNF9B                                 | C1q and tumor necrosis factor related protein 9B                                                                          |
| 1,23 | FAM45A                                   | Transcript Identified by AceView, Entrez Gene ID(s)<br>404636                                                             |
| 1,23 | NLRP12                                   | NLR family, pyrin domain containing 12                                                                                    |
| 1,23 | VN1R3                                    | vomeroneasal 1 receptor 3 (gene/pseudogene)                                                                               |
| 1,23 | PLN                                      | phospholamban                                                                                                             |
| 1,23 | FCRL4                                    | Fc receptor-like 4                                                                                                        |
| 1,23 | AGR2                                     | anterior gradient 2, protein disulphide isomerase family<br>member                                                        |
| 1,23 | CCDC105                                  | coiled-coil domain containing 105                                                                                         |
| 1,23 | IZUMO1R                                  | IZUMO1 receptor, JUNO                                                                                                     |
| 1,23 | PPP2R4                                   | protein phosphatase 2A activator, regulatory subunit 4                                                                    |
| 1,23 | C17orf77                                 | chromosome 17 open reading frame 77                                                                                       |
| 1,23 | ATOH1                                    | atonal bHLH transcription factor 1                                                                                        |
| 1,23 | ZNF28                                    | zinc finger protein 28                                                                                                    |
| 1,23 | FPGT                                     | fucose-1-phosphate guanylyltransferase                                                                                    |
| 1,23 | FGF18                                    | fibroblast growth factor 18                                                                                               |
| 1,23 | RIIAD1                                   | regulatory subunit of type II PKA R-subunit (RIIa)<br>domain containing 1                                                 |
| 1,23 | RRP12                                    | Zhang2013 ALT_ACCEPTOR, ALT_DONOR, coding,<br>INTERNAL, intronic best transcript NM_015179                                |
| 1,23 | ZNF546                                   | zinc finger protein 546                                                                                                   |
| 1,23 | B4GALNT2                                 | beta-1,4-N-acetyl-galactosaminyl transferase 2                                                                            |
| 1,23 | PRKG1                                    | Memczak2013 ALT_ACCEPTOR, ALT_DONOR,<br>coding, INTERNAL, intronic best transcript<br>NM_001098512                        |
| 1,23 | ZNF676                                   | zinc finger protein 676                                                                                                   |
| 1,23 | IL1RL2                                   | interleukin 1 receptor-like 2                                                                                             |
| 1,23 | MEIG1                                    | meiosis/spermiogenesis associated 1                                                                                       |
| 1,22 | BDH1                                     | 3-hydroxybutyrate dehydrogenase, type 1                                                                                   |
| 1,22 | C11orf94                                 | chromosome 11 open reading frame 94                                                                                       |

|      |                            |                                                                                           |
|------|----------------------------|-------------------------------------------------------------------------------------------|
| 1,22 | GOLGA6L22;<br>GOLGA6L1     | golgin A6 family-like 22; golgin A6 family-like 1                                         |
| 1,22 | ASPHD2                     | aspartate beta-hydroxylase domain containing 2                                            |
| 1,22 | UNC93A                     | unc-93 homolog A (C. elegans)                                                             |
| 1,22 | WNT5A                      | wingless-type MMTV integration site family, member 5A                                     |
| 1,22 | MIR1-1HG;<br>MIR133A2      | MIR1-1 host gene; microRNA 133a-2                                                         |
| 1,22 | GRM8                       | glutamate receptor, metabotropic 8                                                        |
| 1,22 | IDO1                       | indoleamine 2,3-dioxygenase 1                                                             |
| 1,22 | PROCA1                     | protein interacting with cyclin A1                                                        |
| 1,22 | NAF1                       | nuclear assembly factor 1 ribonucleoprotein                                               |
| 1,22 | C3orf52                    | chromosome 3 open reading frame 52                                                        |
| 1,22 | KBTBD13                    | kelch repeat and BTB (POZ) domain containing 13                                           |
| 1,22 | EGR4                       | early growth response 4                                                                   |
| 1,22 | LOC79160; RP5-<br>907D15.4 | uncharacterized LOC79160; novel transcript                                                |
| 1,22 | XIRP1                      | xin actin binding repeat containing 1                                                     |
| 1,22 | B4GALT3                    | UDP-Gal:betaGlcNAc beta 1,4- galactosyltransferase, polypeptide 3                         |
| 1,22 | ANGEL1                     | angel homolog 1 (Drosophila)                                                              |
| 1,22 | SOHLH2                     | spermatogenesis and oogenesis specific basic helix-loop-helix 2                           |
| 1,22 | EFEMP1                     | EGF containing fibulin-like extracellular matrix protein 1                                |
| 1,22 | COL22A1                    | collagen, type XXII, alpha 1                                                              |
| 1,22 | ANXA9                      | annexin A9                                                                                |
| 1,22 | GPX3                       | glutathione peroxidase 3                                                                  |
| 1,22 | TNN                        | tenascin N                                                                                |
| 1,22 | ARMC7                      | armadillo repeat containing 7                                                             |
| 1,22 | C22orf34                   | chromosome 22 open reading frame 34                                                       |
| 1,22 | C11orf91                   | chromosome 11 open reading frame 91                                                       |
| 1,22 | ALG3                       | ALG3, alpha-1,3- mannosyltransferase                                                      |
| 1,22 | TMSB15B                    | thymosin beta 15B                                                                         |
| 1,22 | OR52J3                     | olfactory receptor, family 52, subfamily J, member 3                                      |
| 1,22 | IFNGR2                     | Memczak2013 ALT_ACCEPTOR, ALT_DONOR, coding, INTERNAL, intronic best transcript NM_005534 |
| 1,22 | TRIM72                     | tripartite motif containing 72, E3 ubiquitin protein ligase                               |
| 1,22 | CASS4                      | Cas scaffolding protein family member 4                                                   |
| 1,22 | APOC4-APOC2;<br>APOC2      | APOC4-APOC2 readthrough (NMD candidate); apolipoprotein C-II                              |
| 1,22 | GRIN3B                     | glutamate receptor, ionotropic, N-methyl-D-aspartate 3B                                   |
| 1,22 | KRTAP9-3                   | keratin associated protein 9-3                                                            |
| 1,22 | SMAD6                      | SMAD family member 6                                                                      |
| 1,22 | NDUFA8                     | Transcript Identified by AceView, Entrez Gene ID(s) 4702                                  |
| 1,22 | BLK                        | BLK proto-oncogene, Src family tyrosine kinase                                            |
| 1,22 | LECT1                      | leukocyte cell derived chemotaxin 1                                                       |

|      |                                                                                                                                 |                                                                                                                                                                                                                                                                                                                                                                                                                                                                                                                                                                                                                                                                                                                                                                                                                                                                                                                                                                   |
|------|---------------------------------------------------------------------------------------------------------------------------------|-------------------------------------------------------------------------------------------------------------------------------------------------------------------------------------------------------------------------------------------------------------------------------------------------------------------------------------------------------------------------------------------------------------------------------------------------------------------------------------------------------------------------------------------------------------------------------------------------------------------------------------------------------------------------------------------------------------------------------------------------------------------------------------------------------------------------------------------------------------------------------------------------------------------------------------------------------------------|
| 1,22 | CDH17                                                                                                                           | cadherin 17, LI cadherin (liver-intestine)                                                                                                                                                                                                                                                                                                                                                                                                                                                                                                                                                                                                                                                                                                                                                                                                                                                                                                                        |
| 1,22 | CCDC148                                                                                                                         | coiled-coil domain containing 148                                                                                                                                                                                                                                                                                                                                                                                                                                                                                                                                                                                                                                                                                                                                                                                                                                                                                                                                 |
| 1,22 | MCF2                                                                                                                            | MCF.2 cell line derived transforming sequence                                                                                                                                                                                                                                                                                                                                                                                                                                                                                                                                                                                                                                                                                                                                                                                                                                                                                                                     |
| 1,22 | ITGBL1                                                                                                                          | integrin beta like 1                                                                                                                                                                                                                                                                                                                                                                                                                                                                                                                                                                                                                                                                                                                                                                                                                                                                                                                                              |
| 1,22 | ANK1                                                                                                                            | ankyrin 1, erythrocytic                                                                                                                                                                                                                                                                                                                                                                                                                                                                                                                                                                                                                                                                                                                                                                                                                                                                                                                                           |
| 1,22 | MAGEA10                                                                                                                         | MAGE family member A10                                                                                                                                                                                                                                                                                                                                                                                                                                                                                                                                                                                                                                                                                                                                                                                                                                                                                                                                            |
| 1,22 | FAM90A1                                                                                                                         | family with sequence similarity 90, member A1                                                                                                                                                                                                                                                                                                                                                                                                                                                                                                                                                                                                                                                                                                                                                                                                                                                                                                                     |
| 1,22 | FHL3                                                                                                                            | four and a half LIM domains 3                                                                                                                                                                                                                                                                                                                                                                                                                                                                                                                                                                                                                                                                                                                                                                                                                                                                                                                                     |
| 1,22 | COQ3                                                                                                                            | coenzyme Q3 methyltransferase                                                                                                                                                                                                                                                                                                                                                                                                                                                                                                                                                                                                                                                                                                                                                                                                                                                                                                                                     |
| 1,22 | VCAM1                                                                                                                           | vascular cell adhesion molecule 1                                                                                                                                                                                                                                                                                                                                                                                                                                                                                                                                                                                                                                                                                                                                                                                                                                                                                                                                 |
| 1,22 | ADD3                                                                                                                            | adducin 3 (gamma)                                                                                                                                                                                                                                                                                                                                                                                                                                                                                                                                                                                                                                                                                                                                                                                                                                                                                                                                                 |
| 1,22 | PRYP4                                                                                                                           | PTPN13-like, Y-linked pseudogene 4                                                                                                                                                                                                                                                                                                                                                                                                                                                                                                                                                                                                                                                                                                                                                                                                                                                                                                                                |
| 1,22 | WSCD1                                                                                                                           | WSC domain containing 1                                                                                                                                                                                                                                                                                                                                                                                                                                                                                                                                                                                                                                                                                                                                                                                                                                                                                                                                           |
| 1,22 | TAF1                                                                                                                            | Transcript Identified by AceView, Entrez Gene ID(s)<br>6872                                                                                                                                                                                                                                                                                                                                                                                                                                                                                                                                                                                                                                                                                                                                                                                                                                                                                                       |
| 1,22 | NCOA7                                                                                                                           | Transcript Identified by AceView, Entrez Gene ID(s)<br>135112                                                                                                                                                                                                                                                                                                                                                                                                                                                                                                                                                                                                                                                                                                                                                                                                                                                                                                     |
| 1,22 | ADRB1                                                                                                                           | adrenoceptor beta 1                                                                                                                                                                                                                                                                                                                                                                                                                                                                                                                                                                                                                                                                                                                                                                                                                                                                                                                                               |
| 1,22 | PLBD1                                                                                                                           | Memczak2013 ANTISENSE, coding, INTERNAL,<br>intronic best transcript NM_024829                                                                                                                                                                                                                                                                                                                                                                                                                                                                                                                                                                                                                                                                                                                                                                                                                                                                                    |
| 1,22 | ALDH1L1                                                                                                                         | aldehyde dehydrogenase 1 family, member L1                                                                                                                                                                                                                                                                                                                                                                                                                                                                                                                                                                                                                                                                                                                                                                                                                                                                                                                        |
| 1,22 | RAB9B                                                                                                                           | RAB9B, member RAS oncogene family                                                                                                                                                                                                                                                                                                                                                                                                                                                                                                                                                                                                                                                                                                                                                                                                                                                                                                                                 |
| 1,22 | C4BPA                                                                                                                           | complement component 4 binding protein, alpha                                                                                                                                                                                                                                                                                                                                                                                                                                                                                                                                                                                                                                                                                                                                                                                                                                                                                                                     |
| 1,22 | ZNF75A                                                                                                                          | zinc finger protein 75a                                                                                                                                                                                                                                                                                                                                                                                                                                                                                                                                                                                                                                                                                                                                                                                                                                                                                                                                           |
| 1,22 | ST5                                                                                                                             | Transcript Identified by AceView, Entrez Gene ID(s)<br>6764                                                                                                                                                                                                                                                                                                                                                                                                                                                                                                                                                                                                                                                                                                                                                                                                                                                                                                       |
| 1,22 | KIR2DS5;<br>KIR3DL2;<br>KIR2DL1;<br>KIR3DL3;<br>KIR3DL1;<br>KIR2DS4;<br>KIR2DL3;<br>KIR3DS1;<br>KIR2DS2;<br>KIR2DP1;<br>KIR3DP1 | killer cell immunoglobulin-like receptor, two domains,<br>short cytoplasmic tail, 5; killer cell immunoglobulin-<br>like receptor, three domains, long cytoplasmic tail, 2;<br>killer cell immunoglobulin-like receptor, two domains,<br>long cytoplasmic tail, 1; killer cell immunoglobulin-<br>like receptor, three domains, long cytoplasmic tail, 3;<br>killer cell immunoglobulin-like receptor, three<br>domains, long cytoplasmic tail, 1; killer cell<br>immunoglobulin-like receptor, two domains, short<br>cytoplasmic tail, 4; killer cell immunoglobulin-like<br>receptor, two domains, long cytoplasmic tail, 3; killer<br>cell immunoglobulin-like receptor, three domains, short<br>cytoplasmic tail, 1; killer cell immunoglobulin-like<br>receptor, two domains, short cytoplasmic tail, 2; killer<br>cell immunoglobulin-like receptor, two domains,<br>pseudogene 1; killer cell immunoglobulin-like receptor,<br>three domains, pseudogene 1 |
| 1,22 | ZNF280D                                                                                                                         | zinc finger protein 280D                                                                                                                                                                                                                                                                                                                                                                                                                                                                                                                                                                                                                                                                                                                                                                                                                                                                                                                                          |
| 1,22 | SLC30A4                                                                                                                         | solute carrier family 30 (zinc transporter), member 4                                                                                                                                                                                                                                                                                                                                                                                                                                                                                                                                                                                                                                                                                                                                                                                                                                                                                                             |
| 1,22 | NRK                                                                                                                             | Nik related kinase                                                                                                                                                                                                                                                                                                                                                                                                                                                                                                                                                                                                                                                                                                                                                                                                                                                                                                                                                |
| 1,22 | PRSS2                                                                                                                           | protease, serine, 2 (trypsin 2)                                                                                                                                                                                                                                                                                                                                                                                                                                                                                                                                                                                                                                                                                                                                                                                                                                                                                                                                   |
| 1,22 | FAM71C                                                                                                                          | family with sequence similarity 71, member C                                                                                                                                                                                                                                                                                                                                                                                                                                                                                                                                                                                                                                                                                                                                                                                                                                                                                                                      |
| 1,22 | SH3GL2                                                                                                                          | SH3-domain GRB2-like 2                                                                                                                                                                                                                                                                                                                                                                                                                                                                                                                                                                                                                                                                                                                                                                                                                                                                                                                                            |

|      |                    |                                                                                 |
|------|--------------------|---------------------------------------------------------------------------------|
| 1,22 | SH3BGR12           | Transcript Identified by AceView, Entrez Gene ID(s)<br>83699                    |
| 1,22 | OR8J1              | olfactory receptor, family 8, subfamily J, member 1                             |
| 1,22 | C15orf39           | chromosome 15 open reading frame 39                                             |
| 1,22 | ITIH2              | inter-alpha-trypsin inhibitor heavy chain 2                                     |
| 1,22 | NECAB1             | N-terminal EF-hand calcium binding protein 1                                    |
| 1,22 | GRIA1              | glutamate receptor, ionotropic, AMPA 1                                          |
| 1,22 | PEX14              | peroxisomal biogenesis factor 14                                                |
| 1,22 | DIS3L2             | DIS3 like 3-5 exoribonuclease 2                                                 |
| 1,22 | TRMT10B            | tRNA methyltransferase 10B                                                      |
| 1,22 | CFAP73             | cilia and flagella associated protein 73                                        |
| 1,22 | ND3                | NADH dehydrogenase, subunit 3 (complex I)                                       |
| 1,22 | ANO4               | anoctamin 4                                                                     |
| 1,22 | ADAMTS14           | ADAM metalloproteinase with thrombospondin type 1<br>motif 14                   |
| 1,22 | PDCD1              | programmed cell death 1                                                         |
| 1,22 | RIN1               | Ras and Rab interactor 1                                                        |
| 1,22 | ago-04             | argonaute RISC catalytic component 4                                            |
| 1,22 | MMEL1              | membrane metallo-endopeptidase-like 1                                           |
| 1,22 | NDUFA10            | NADH dehydrogenase (ubiquinone) 1 alpha<br>subcomplex, 10, 42kDa                |
| 1,22 | SNCAIP             | synuclein alpha interacting protein                                             |
| 1,22 | HAVCR2             | hepatitis A virus cellular receptor 2                                           |
| 1,22 | CIART              | circadian associated repressor of transcription                                 |
| 1,22 | ACP5               | acid phosphatase 5, tartrate resistant                                          |
| 1,22 | OR9A2              | olfactory receptor, family 9, subfamily A, member 2                             |
| 1,22 | SLC25A53           | solute carrier family 25, member 53                                             |
| 1,22 | C19orf35           | chromosome 19 open reading frame 35                                             |
| 1,22 | CMTM7              | CKLF-like MARVEL transmembrane domain<br>containing 7                           |
| 1,22 | CAMKV              | CaM kinase-like vesicle-associated                                              |
| 1,22 | OR11H1             | olfactory receptor, family 11, subfamily H, member 1                            |
| 1,22 | EGLN3              | egl-9 family hypoxia-inducible factor 3                                         |
| 1,22 | STK40              | serine/threonine kinase 40                                                      |
| 1,22 | RASEF              | RAS and EF-hand domain containing                                               |
| 1,22 | GPR6               | G protein-coupled receptor 6                                                    |
| 1,22 | KLHL12             | kelch-like family member 12                                                     |
| 1,22 | WBSCR28            | Williams-Beuren syndrome chromosome region 28                                   |
| 1,22 | TNK2               | tyrosine kinase, non-receptor, 2                                                |
| 1,22 | ADHFE1;<br>C8orf46 | alcohol dehydrogenase, iron containing 1; chromosome<br>8 open reading frame 46 |
| 1,22 | ZNF671             | zinc finger protein 671                                                         |
| 1,22 | FOXB1              | forkhead box B1                                                                 |
| 1,21 | CNKSR3             | CNKSR family member 3                                                           |
| 1,21 | ATP6AP1L           | ATPase, H <sup>+</sup> transporting, lysosomal accessory protein<br>1-like      |
| 1,21 | CECR5              | cat eye syndrome chromosome region, candidate 5                                 |
| 1,21 | FUT10              | fucosyltransferase 10 (alpha (1,3) fucosyltransferase)                          |
| 1,21 | DEFB128            | defensin, beta 128                                                              |

|      |                                        |                                                                                                                                                                                                                      |
|------|----------------------------------------|----------------------------------------------------------------------------------------------------------------------------------------------------------------------------------------------------------------------|
| 1,21 | CNTNAP3B                               | Salzman2013 ANNOTATED, CDS, coding, INTERNAL, OVCODE, OVEXON best transcript NM_001201380                                                                                                                            |
| 1,21 | CCDC30                                 | coiled-coil domain containing 30                                                                                                                                                                                     |
| 1,21 | THAP6                                  | THAP domain containing 6                                                                                                                                                                                             |
| 1,21 | OVOL3                                  | ovo-like zinc finger 3                                                                                                                                                                                               |
| 1,21 | ZNF384                                 | zinc finger protein 384                                                                                                                                                                                              |
| 1,21 | ZKSCAN7                                | zinc finger with KRAB and SCAN domains 7                                                                                                                                                                             |
| 1,21 | LIPG                                   | lipase, endothelial                                                                                                                                                                                                  |
| 1,21 | C5AR1                                  | complement component 5a receptor 1                                                                                                                                                                                   |
| 1,21 | ZNF626                                 | zinc finger protein 626                                                                                                                                                                                              |
| 1,21 | OR2T2                                  | olfactory receptor, family 2, subfamily T, member 2                                                                                                                                                                  |
| 1,21 | RHOU                                   | ras homolog family member U                                                                                                                                                                                          |
| 1,21 | CHRM5                                  | cholinergic receptor, muscarinic 5                                                                                                                                                                                   |
| 1,21 | HRCT1                                  | histidine rich carboxyl terminus 1                                                                                                                                                                                   |
| 1,21 | ZNF780A                                | zinc finger protein 780A                                                                                                                                                                                             |
| 1,21 | GDPD4                                  | glycerophosphodiester phosphodiesterase domain containing 4                                                                                                                                                          |
| 1,21 | SKAP2                                  | src kinase associated phosphoprotein 2                                                                                                                                                                               |
| 1,21 | DUSP18                                 | dual specificity phosphatase 18                                                                                                                                                                                      |
| 1,21 | FBXL5                                  | F-box and leucine-rich repeat protein 5                                                                                                                                                                              |
| 1,21 | DLEU7                                  | deleted in lymphocytic leukemia, 7                                                                                                                                                                                   |
| 1,21 | NR2E3                                  | nuclear receptor subfamily 2, group E, member 3                                                                                                                                                                      |
| 1,21 | NT5E                                   | 5-nucleotidase, ecto (CD73)                                                                                                                                                                                          |
| 1,21 | NARS2                                  | asparaginyl-tRNA synthetase 2, mitochondrial (putative)                                                                                                                                                              |
| 1,21 | IL6                                    | interleukin 6                                                                                                                                                                                                        |
| 1,21 | FAM231A;<br>FAM231C; RP5-1182A14.6     | Homo sapiens family with sequence similarity 231, member A (FAM231A), mRNA.; Homo sapiens family with sequence similarity 231, member C (FAM231C), mRNA.; Protein FAM231A/C [Source:UniProtKB/Swiss-Prot;Acc:A6NEA5] |
| 1,21 | UFSP2                                  | UFM1-specific peptidase 2                                                                                                                                                                                            |
| 1,21 | THRAP3                                 | Jeck2013 ALT_ACCEPTOR, ALT_DONOR, coding, INTERNAL, intronic best transcript NM_005119                                                                                                                               |
| 1,21 | AGBL1                                  | ATP/GTP binding protein-like 1                                                                                                                                                                                       |
| 1,21 | GAS8                                   | Memczak2013 ALT_ACCEPTOR, ALT_DONOR, INTERNAL, intronic, ncRNA best transcript NR_023348                                                                                                                             |
| 1,21 | LOC285692;<br>CTD-2143L24.1;<br>TAS2R1 | uncharacterized LOC285692; novel transcript; Transcript Identified by AceView, Entrez Gene ID(s) 285692; 50834                                                                                                       |
| 1,21 | LOC79999;<br>LOC388436;<br>AC007952.5  | Homo sapiens uncharacterized LOC79999 (LOC79999), mRNA.; uncharacterized protein ENSP00000382042; novel transcript                                                                                                   |
| 1,21 | NEUROD6                                | neuronal differentiation 6                                                                                                                                                                                           |
| 1,21 | C2orf42                                | chromosome 2 open reading frame 42                                                                                                                                                                                   |
| 1,21 | TNP1                                   | transition protein 1 (during histone to protamine replacement)                                                                                                                                                       |
| 1,21 | HSD11B2                                | hydroxysteroid (11-beta) dehydrogenase 2                                                                                                                                                                             |
| 1,21 | STOX1                                  | storkhead box 1                                                                                                                                                                                                      |

|      |          |                                                                                               |
|------|----------|-----------------------------------------------------------------------------------------------|
| 1,21 | CUX2     | cut-like homeobox 2                                                                           |
| 1,21 | VOPP1    | Jeck2013 ALT_ACCEPTOR, ALT_DONOR, coding, INTERNAL, intronic best transcript NM_030796        |
| 1,21 | KLHL14   | kelch-like family member 14                                                                   |
| 1,21 | HIGD1B   | HIG1 hypoxia inducible domain family, member 1B                                               |
| 1,21 | GRID2    | glutamate receptor, ionotropic, delta 2                                                       |
| 1,21 | SHC3     | SHC (Src homology 2 domain containing) transforming protein 3                                 |
| 1,21 | ARHGEF38 | Rho guanine nucleotide exchange factor 38                                                     |
| 1,21 | IL16     | interleukin 16                                                                                |
| 1,21 | TMEM217  | transmembrane protein 217                                                                     |
| 1,21 | EIF3F    | Eukaryotic translation initiation factor 3 subunit F [Source:UniProtKB/Swiss-Prot;Acc:O00303] |
| 1,21 | TTC6     | tetratricopeptide repeat domain 6                                                             |
| 1,21 | PLIN2    | perilipin 2                                                                                   |
| 1,21 | C4B      | complement component 4B (Chido blood group)                                                   |
| 1,21 | C4A      | complement component 4A (Rodgers blood group)                                                 |
| 1,21 | TMEM206  | transmembrane protein 206                                                                     |
| 1,21 | SLC2A8   | solute carrier family 2 (facilitated glucose transporter), member 8                           |
| 1,21 | PPP1R3E  | protein phosphatase 1, regulatory subunit 3E                                                  |
| 1,21 | RAB19    | RAB19, member RAS oncogene family                                                             |
| 1,21 | KIF5A    | kinesin family member 5A                                                                      |
| 1,21 | LRRC25   | leucine rich repeat containing 25                                                             |
| 1,21 | FOXEO3   | forkhead box E3                                                                               |
| 1,21 | NOX3     | NADPH oxidase 3                                                                               |
| 1,21 | HIGD2B   | HIG1 hypoxia inducible domain family, member 2B                                               |
| 1,21 | ZNF660   | zinc finger protein 660                                                                       |
| 1,21 | INPP5D   | inositol polyphosphate-5-phosphatase D                                                        |
| 1,21 | SLC2A6   | solute carrier family 2 (facilitated glucose transporter), member 6                           |
| 1,21 | LDLRAD1  | low density lipoprotein receptor class A domain containing 1                                  |
| 1,21 | AGPAT4   | 1-acylglycerol-3-phosphate O-acyltransferase 4                                                |
| 1,21 | SERPINE2 | serpin peptidase inhibitor, clade E (nexin, plasminogen activator inhibitor type 1), member 2 |
| 1,21 | CSF1R    | colony stimulating factor 1 receptor                                                          |
| 1,21 | PCDH11X  | protocadherin 11 X-linked                                                                     |
| 1,21 | APOL6    | apolipoprotein L, 6                                                                           |
| 1,21 | UBE2L6   | ubiquitin-conjugating enzyme E2L 6                                                            |
| 1,21 | C1orf127 | chromosome 1 open reading frame 127                                                           |
| 1,21 | IRX2     | Transcript Identified by AceView, Entrez Gene ID(s) 153572                                    |
| 1,21 | NDUFV3   | Transcript Identified by AceView, Entrez Gene ID(s) 4731                                      |
| 1,21 | JAKMIP1  | janus kinase and microtubule interacting protein 1                                            |
| 1,21 | SCNN1B   | sodium channel, non voltage gated 1 beta subunit                                              |
| 1,21 | ENKUR    | enkurin, TRPC channel interacting protein                                                     |
| 1,21 | RAPGEF5  | Rap guanine nucleotide exchange factor 5                                                      |
| 1,21 | MYEOV    | myeloma overexpressed                                                                         |

|      |                              |                                                                                                                             |
|------|------------------------------|-----------------------------------------------------------------------------------------------------------------------------|
| 1,21 | CPA5                         | carboxypeptidase A5                                                                                                         |
| 1,21 | BST1                         | bone marrow stromal cell antigen 1                                                                                          |
| 1,21 | CARD17                       | caspase recruitment domain family, member 17                                                                                |
| 1,21 | LINC01590;<br>SMIM8          | long intergenic non-protein coding RNA 1590; small<br>integral membrane protein 8                                           |
| 1,21 | GSTA3                        | glutathione S-transferase alpha 3                                                                                           |
| 1,21 | PXYLP1                       | 2-phosphoxylose phosphatase 1                                                                                               |
| 1,21 | TAGLN3                       | transgelin 3                                                                                                                |
| 1,21 | ISLR2                        | immunoglobulin superfamily containing leucine-rich<br>repeat 2                                                              |
| 1,21 | ZNF720                       | zinc finger protein 720                                                                                                     |
| 1,21 | ZNF253                       | zinc finger protein 253                                                                                                     |
| 1,21 | RNF144B                      | ring finger protein 144B                                                                                                    |
| 1,21 | GPRIN2                       | G protein regulated inducer of neurite outgrowth 2                                                                          |
| 1,21 | KRTDAP                       | keratinocyte differentiation-associated protein                                                                             |
| 1,21 | UTY                          | ubiquitously transcribed tetratricopeptide repeat<br>containing, Y-linked                                                   |
| 1,21 | PCM1                         | Transcript Identified by AceView, Entrez Gene ID(s)<br>5108                                                                 |
| 1,21 | LINC01205                    | long intergenic non-protein coding RNA 1205                                                                                 |
| 1,21 | IL25                         | interleukin 25                                                                                                              |
| 1,21 | SERPINB12                    | serpin peptidase inhibitor, clade B (ovalbumin),<br>member 12                                                               |
| 1,21 | ERCC2                        | excision repair cross-complementation group 2                                                                               |
| 1,21 | KRTAP19-7                    | keratin associated protein 19-7                                                                                             |
| 1,21 | F2R                          | coagulation factor II (thrombin) receptor                                                                                   |
| 1,21 | CBX8                         | chromobox homolog 8                                                                                                         |
| 1,21 | ABHD12B                      | abhydrolase domain containing 12B                                                                                           |
| 1,21 | CASP14                       | caspase 14                                                                                                                  |
| 1,21 | LOC100128554;<br>RP5-944M2.3 | uncharacterized LOC100128554; Transcript Identified<br>by AceView, Entrez Gene ID(s) 144678; 100128554;<br>novel transcript |
| 1,21 | CLDN12                       | claudin 12                                                                                                                  |
| 1,21 | MYOM2                        | myomesin 2                                                                                                                  |
| 1,21 | RTBDN                        | retbindin                                                                                                                   |
| 1,21 | C6orf10                      | chromosome 6 open reading frame 10                                                                                          |
| 1,21 | OR56A1                       | olfactory receptor, family 56, subfamily A, member 1                                                                        |
| 1,21 | COG7                         | component of oligomeric golgi complex 7                                                                                     |
| 1,21 | PAPPA2                       | pappalysin 2                                                                                                                |
| 1,21 | C16orf95                     | chromosome 16 open reading frame 95                                                                                         |
| 1,21 | DACT1                        | Transcript Identified by AceView, Entrez Gene ID(s)<br>51339                                                                |
| 1,20 | BCL2L14                      | BCL2-like 14 (apoptosis facilitator)                                                                                        |
| 1,20 | AMPH                         | amphiphysin                                                                                                                 |
| 1,20 | SLC12A3                      | solute carrier family 12 (sodium/chloride transporter),<br>member 3                                                         |
| 1,20 | IL27                         | interleukin 27                                                                                                              |
| 1,20 | SERTAD4                      | SERTA domain containing 4                                                                                                   |
| 1,20 | LGR5                         | leucine-rich repeat containing G protein-coupled<br>receptor 5                                                              |

|      |             |                                                                                                           |
|------|-------------|-----------------------------------------------------------------------------------------------------------|
| 1,20 | OR4D5       | olfactory receptor, family 4, subfamily D, member 5                                                       |
| 1,20 | ZNF732      | zinc finger protein 732                                                                                   |
| 1,20 | ZNF573      | zinc finger protein 573                                                                                   |
| 1,20 | DYSF; kydor | Memczak2013 ANTISENSE, coding, INTERNAL, UTR5 best transcript NM_003494; Transcript Identified by AceView |
| 1,20 | BEND5       | BEN domain containing 5                                                                                   |
| 1,20 | TNFRSF8     | tumor necrosis factor receptor superfamily, member 8                                                      |
| 1,20 | CEACAM5     | carcinoembryonic antigen-related cell adhesion molecule 5                                                 |
| 1,20 | NPHP1       | nephronophthisis 1 (juvenile)                                                                             |
| 1,20 | FAM155A     | Jeck2013 ALT_ACCEPTOR, ALT_DONOR, coding, INTERNAL, intronic best transcript NM_001080396                 |
| 1,20 | SPINK1      | serine peptidase inhibitor, Kazal type 1                                                                  |
| 1,20 | USP17L10    | ubiquitin specific peptidase 17-like family member 10                                                     |
| 1,20 | FLRT3       | fibronectin leucine rich transmembrane protein 3                                                          |
| 1,20 | DGKD        | diacylglycerol kinase, delta 130kDa                                                                       |
| 1,20 | LIN37       | lin-37 DREAM MuvB core complex component                                                                  |
| 1,20 | NCKAP1L     | NCK-associated protein 1-like                                                                             |
| 1,20 | MARS2       | methionyl-tRNA synthetase 2, mitochondrial                                                                |
| 1,20 | ABCA13      | Memczak2013 ALT_ACCEPTOR, ALT_DONOR, coding, INTERNAL, intronic best transcript NM_152701                 |
| 1,20 | TGM4        | transglutaminase 4                                                                                        |
| 1,20 | ZNF140      | zinc finger protein 140                                                                                   |
| 1,20 | SAG         | S-antigen; retina and pineal gland (arrestin)                                                             |
| 1,20 | KCNAB1      | potassium channel, voltage gated subfamily A regulatory beta subunit 1                                    |
| 1,20 | FUBP3       | Zhang2013 ALT_ACCEPTOR, ALT_DONOR, coding, INTERNAL, intronic best transcript NM_003934                   |
| 1,20 | GPR26       | G protein-coupled receptor 26                                                                             |
| 1,20 | BPIFA1      | BPI fold containing family A, member 1                                                                    |
| 1,20 | DPP6        | dipeptidyl-peptidase 6                                                                                    |
| 1,20 | VSTM5       | V-set and transmembrane domain containing 5                                                               |
| 1,20 | TMEM147-AS1 | TMEM147 antisense RNA 1                                                                                   |
| 1,20 | USP41       | ubiquitin specific peptidase 41                                                                           |
| 1,20 | ADGRF4      | adhesion G protein-coupled receptor F4                                                                    |
| 1,20 | STRA13      | stimulated by retinoic acid 13                                                                            |
| 1,20 | RFX3        | Memczak2013 ALT_ACCEPTOR, ALT_DONOR, coding, INTERNAL, intronic best transcript NM_002919                 |
| 1,20 | IRX2        | iroquois homeobox 2                                                                                       |

|      |                                                                                   |                                                                                                                                                                          |
|------|-----------------------------------------------------------------------------------|--------------------------------------------------------------------------------------------------------------------------------------------------------------------------|
| 1,20 | GAGE12F;<br>GAGE12J;<br>GAGE12D;<br>GAGE5; GAGE6;<br>GAGE12B;<br>GAGE4;<br>GAGE2E | G antigen 12F; G antigen 12J; G antigen 12D; G antigen 5; G antigen 6; G antigen 12B; G antigen 4; G antigen 2E                                                          |
| 1,20 | DZANK1                                                                            | double zinc ribbon and ankyrin repeat domains 1                                                                                                                          |
| 1,20 | ESM1                                                                              | endothelial cell-specific molecule 1                                                                                                                                     |
| 1,20 | C12orf80                                                                          | chromosome 12 open reading frame 80                                                                                                                                      |
| 1,20 | ZNF408                                                                            | zinc finger protein 408                                                                                                                                                  |
| 1,20 | AGXT2                                                                             | alanine--glyoxylate aminotransferase 2                                                                                                                                   |
| 1,20 | BEST1                                                                             | bestrophin 1                                                                                                                                                             |
| 1,20 | OR2A1                                                                             | olfactory receptor, family 2, subfamily A, member 1                                                                                                                      |
| 1,20 | ROGDI                                                                             | rogdi homolog                                                                                                                                                            |
| 1,20 | STOML3                                                                            | stomatin (EPB72)-like 3                                                                                                                                                  |
| 1,20 | TIMM50                                                                            | translocase of inner mitochondrial membrane 50 homolog (S. cerevisiae)                                                                                                   |
| 1,20 | SLC6A1                                                                            | solute carrier family 6 (neurotransmitter transporter), member 1                                                                                                         |
| 1,20 | RASSF1-AS1                                                                        | RASSF1 antisense RNA 1                                                                                                                                                   |
| 1,20 | NCAM1                                                                             | neural cell adhesion molecule 1                                                                                                                                          |
| 1,20 | OTX1                                                                              | orthodenticle homeobox 1                                                                                                                                                 |
| 1,20 | MBD3L2; CTB-25J19.1                                                               | Synthetic construct Homo sapiens clone IMAGE:100069019, MGC:199030 methyl-CpG binding domain protein 3-like 2 (MBD3L2) mRNA, encodes complete protein.; novel transcript |
| 1,20 | TRPC5                                                                             | transient receptor potential cation channel, subfamily C, member 5                                                                                                       |
| 1,20 | MT1HL1                                                                            | metallothionein 1H-like 1                                                                                                                                                |
| 1,20 | POU3F2                                                                            | POU class 3 homeobox 2                                                                                                                                                   |
| 1,20 | FMN1                                                                              | formin 1                                                                                                                                                                 |
| 1,20 | GRN                                                                               | Memczak2013 ANTISENSE, CDS, coding, INTERNAL best transcript NM_002087                                                                                                   |
| 1,20 | VAX2                                                                              | ventral anterior homeobox 2                                                                                                                                              |
| 1,20 | MVB12A; BISPR                                                                     | multivesicular body subunit 12A; BST2 interferon stimulated positive regulator (non-protein coding)                                                                      |
| 1,20 | RRP12                                                                             | Memczak2013 ALT_ACCEPTOR, ALT_DONOR, coding, INTERNAL, intronic best transcript NM_001145114                                                                             |
| 1,20 | MS4A10                                                                            | membrane-spanning 4-domains, subfamily A, member 10                                                                                                                      |
| 1,20 | ADAM9                                                                             | ADAM metalloproteinase domain 9                                                                                                                                          |
| 1,20 | ELSPBP1                                                                           | epididymal sperm binding protein 1                                                                                                                                       |
| 1,20 | VSIG10                                                                            | V-set and immunoglobulin domain containing 10                                                                                                                            |
| 1,20 | OR9Q1                                                                             | olfactory receptor, family 9, subfamily Q, member 1                                                                                                                      |
| 1,20 | PMM1                                                                              | phosphomannomutase 1                                                                                                                                                     |
| 1,20 | PDZD4                                                                             | PDZ domain containing 4                                                                                                                                                  |
| 1,20 | MBD3L2                                                                            | methyl-CpG binding domain protein 3-like 2                                                                                                                               |

|      |                      |                                                                                                                                                                                                                                                                                                                                                                                                                                                        |
|------|----------------------|--------------------------------------------------------------------------------------------------------------------------------------------------------------------------------------------------------------------------------------------------------------------------------------------------------------------------------------------------------------------------------------------------------------------------------------------------------|
| 1,20 | WNT10B               | wingless-type MMTV integration site family, member 10B                                                                                                                                                                                                                                                                                                                                                                                                 |
| 1,20 | OR4A8                | olfactory receptor, family 4, subfamily A, member 8 (gene/pseudogene) [Source:HGNC Symbol;Acc:HGNC:15165]                                                                                                                                                                                                                                                                                                                                              |
| 1,20 | CRISP1               | cysteine-rich secretory protein 1                                                                                                                                                                                                                                                                                                                                                                                                                      |
| 1,20 | LCORL                | Transcript Identified by AceView, Entrez Gene ID(s) 254251                                                                                                                                                                                                                                                                                                                                                                                             |
| 1,20 | SMTNL2               | smoothelin-like 2                                                                                                                                                                                                                                                                                                                                                                                                                                      |
| 1,20 | C19orf81             | chromosome 19 open reading frame 81                                                                                                                                                                                                                                                                                                                                                                                                                    |
| 1,20 | CSMD1                | Transcript Identified by AceView, Entrez Gene ID(s) 64478                                                                                                                                                                                                                                                                                                                                                                                              |
| 1,20 | TRIM9                | tripartite motif containing 9                                                                                                                                                                                                                                                                                                                                                                                                                          |
| 1,20 | TMEM45B              | transmembrane protein 45B                                                                                                                                                                                                                                                                                                                                                                                                                              |
| 1,20 | ZDHHC1               | zinc finger, DHHC-type containing 1                                                                                                                                                                                                                                                                                                                                                                                                                    |
| 1,20 | OR1A2                | olfactory receptor, family 1, subfamily A, member 2                                                                                                                                                                                                                                                                                                                                                                                                    |
| 1,20 | TNNC2                | troponin C type 2 (fast)                                                                                                                                                                                                                                                                                                                                                                                                                               |
| 1,20 | ECHDC3               | enoyl-CoA hydratase domain containing 3                                                                                                                                                                                                                                                                                                                                                                                                                |
| 1,20 | CD1C                 | CD1c molecule                                                                                                                                                                                                                                                                                                                                                                                                                                          |
| 1,20 | CSRP1; markobu       | Memczak2013 ALT_ACCEPTOR, ALT_DONOR, coding, INTERNAL, intronic best transcript NM_001193571; Transcript Identified by AceView                                                                                                                                                                                                                                                                                                                         |
| 1,20 | SERTAD4              | SERTA domain containing 4                                                                                                                                                                                                                                                                                                                                                                                                                              |
| 1,20 | CYP19A1              | cytochrome P450, family 19, subfamily A, polypeptide 1                                                                                                                                                                                                                                                                                                                                                                                                 |
| 1,20 | FAM181A              | family with sequence similarity 181, member A                                                                                                                                                                                                                                                                                                                                                                                                          |
| 1,20 | ARID3C               | AT rich interactive domain 3C (BRIGHT-like)                                                                                                                                                                                                                                                                                                                                                                                                            |
| 1,20 | ASMT; AKAP17A        | acetylserotonin O-methyltransferase; A kinase (PRKA) anchor protein 17A                                                                                                                                                                                                                                                                                                                                                                                |
| 1,20 | ASMT; SFRS17AandASMT | Homo sapiens acetylserotonin O-methyltransferase (ASMT), transcript variant 1, mRNA.; Homo sapiens acetylserotonin O-methyltransferase (ASMT), transcript variant 3, mRNA.; acetylserotonin O-methyltransferase [Source:HGNC Symbol;Acc:HGNC:750]; Homo sapiens acetylserotonin O-methyltransferase, mRNA (cDNA clone MGC:2145 IMAGE:3356470), complete cds.; Transcript Identified by AceView, Entrez Gene ID(s) 438; 8227, RefSeq ID(s) NM_001171038 |
| 1,20 | SLC17A8              | solute carrier family 17 (vesicular glutamate transporter), member 8                                                                                                                                                                                                                                                                                                                                                                                   |
| 1,20 | TAS2R60              | taste receptor, type 2, member 60                                                                                                                                                                                                                                                                                                                                                                                                                      |
| 1,20 | HAMP                 | hepcidin antimicrobial peptide                                                                                                                                                                                                                                                                                                                                                                                                                         |
| 1,20 | SLC4A10              | solute carrier family 4, sodium bicarbonate transporter, member 10                                                                                                                                                                                                                                                                                                                                                                                     |
| 1,20 | PCDHB12              | protocadherin beta 12                                                                                                                                                                                                                                                                                                                                                                                                                                  |
| 1,20 | NAA11                | N(alpha)-acetyltransferase 11, NatA catalytic subunit                                                                                                                                                                                                                                                                                                                                                                                                  |
| 1,20 | GPRASP1              | G protein-coupled receptor associated sorting protein 1                                                                                                                                                                                                                                                                                                                                                                                                |
| 1,20 | RCE1; C11orf80       | Ras converting CAAX endopeptidase 1; chromosome 11 open reading frame 80                                                                                                                                                                                                                                                                                                                                                                               |

|      |                      |                                                                                           |
|------|----------------------|-------------------------------------------------------------------------------------------|
| 1,20 | N4BP3                | NEDD4 binding protein 3                                                                   |
| 1,20 | ENPP7                | ectonucleotide pyrophosphatase/phosphodiesterase 7                                        |
| 1,20 | PRAMEF15;<br>PRAMEF9 | PRAME family member 15; PRAME family member 9                                             |
| 1,20 | CCL27                | chemokine (C-C motif) ligand 27                                                           |
| 1,20 | TRIM47               | tripartite motif containing 47                                                            |
| 1,20 | C1QTNF5; MFRP        | C1q and tumor necrosis factor related protein 5;<br>membrane frizzled-related protein     |
| 1,20 | CDCA7                | cell division cycle associated 7                                                          |
| 1,20 | GTPBP3               | GTP binding protein 3 (mitochondrial)                                                     |
| 1,20 | TARM1                | T cell-interacting, activating receptor on myeloid cells<br>1                             |
| 1,20 | OR5L1                | olfactory receptor, family 5, subfamily L, member 1<br>(gene/pseudogene)                  |
| 1,20 | RXRG                 | retinoid X receptor gamma                                                                 |
| 1,20 | ELMOD3               | Transcript Identified by AceView, Entrez Gene ID(s)<br>84173                              |
| 1,20 | BRINP3               | bone morphogenetic protein/retinoic acid inducible<br>neural-specific 3                   |
| 1,20 | MECR                 | mitochondrial trans-2-enoyl-CoA reductase                                                 |
| 1,20 | PLAGL2               | pleiomorphic adenoma gene-like 2                                                          |
| 1,20 | TMEM198              | transmembrane protein 198                                                                 |
| 1,20 | CDYL2                | chromodomain protein, Y-like 2                                                            |
| 1,20 | PARS2                | prolyl-tRNA synthetase 2, mitochondrial (putative)                                        |
| 1,20 | SPATA31A3            | SPATA31 subfamily A, member 3                                                             |
| 1,20 | SSX2B                | synovial sarcoma, X breakpoint 2B                                                         |
| 1,20 | LYSMD1               | LysM, putative peptidoglycan-binding, domain<br>containing 1                              |
| 1,20 | MAP4K2               | Memczak2013 ANTISENSE, CDS, coding,<br>INTERNAL, intronic best transcript NM_004579       |
| 1,20 | USP29                | ubiquitin specific peptidase 29                                                           |
| 1,20 | ACTBL2               | actin, beta-like 2                                                                        |
| 1,20 | RAB31                | Transcript Identified by AceView, Entrez Gene ID(s)<br>11031                              |
| 1,20 | ZSWIM1               | zinc finger, SWIM-type containing 1                                                       |
| 1,20 | LIAS                 | lipoic acid synthetase                                                                    |
| 1,20 | ICA1                 | islet cell autoantigen 1                                                                  |
| 1,20 | TMEM241              | transmembrane protein 241                                                                 |
| 1,20 | ADGRL4               | adhesion G protein-coupled receptor L4                                                    |
| 1,20 | RASGRF2              | Jeck2013 ALT_ACCEPTOR, ALT_DONOR, coding,<br>INTERNAL, intronic best transcript NM_006909 |
| 1,20 | KCNAB3               | potassium channel, voltage gated subfamily A<br>regulatory beta subunit 3                 |
| 1,20 | REC8                 | REC8 meiotic recombination protein                                                        |
| 1,20 | CC2D2A               | Transcript Identified by AceView, Entrez Gene ID(s)<br>57545                              |
| 1,20 | FAM26E               | family with sequence similarity 26, member E                                              |
| 1,20 | OR56A3               | olfactory receptor, family 56, subfamily A, member 3                                      |
| 1,19 | PORCN                | porcupine homolog (Drosophila)                                                            |
| 1,19 | USP17L21             | ubiquitin specific peptidase 17-like family member 21                                     |

|      |                                   |                                                                                                                                                                    |
|------|-----------------------------------|--------------------------------------------------------------------------------------------------------------------------------------------------------------------|
| 1,19 | NEDD1                             | neural precursor cell expressed, developmentally down-regulated 1                                                                                                  |
| 1,19 | TNNT1                             | troponin T type 1 (skeletal, slow)                                                                                                                                 |
| 1,19 | ZNF98                             | zinc finger protein 98                                                                                                                                             |
| 1,19 | DQX1                              | DEAQ box RNA-dependent ATPase 1                                                                                                                                    |
| 1,19 | BRDT                              | bromodomain, testis-specific                                                                                                                                       |
| 1,19 | ODF4                              | outer dense fiber of sperm tails 4                                                                                                                                 |
| 1,19 | PFN3                              | profilin 3                                                                                                                                                         |
| 1,19 | SFTA2                             | surfactant associated 2                                                                                                                                            |
| 1,19 | CLASP2                            | Transcript Identified by AceView, Entrez Gene ID(s) 23122                                                                                                          |
| 1,19 | PXDN                              | Transcript Identified by AceView, Entrez Gene ID(s) 7837                                                                                                           |
| 1,19 | PUS10                             | pseudouridylate synthase 10                                                                                                                                        |
| 1,19 | KLHL33                            | kelch-like family member 33                                                                                                                                        |
| 1,19 | GPRC5A;<br>MIR614                 | G protein-coupled receptor, class C, group 5, member A; microRNA 614                                                                                               |
| 1,19 | PYCARD-AS1                        | PYCARD antisense RNA 1                                                                                                                                             |
| 1,19 | RBM46                             | RNA binding motif protein 46                                                                                                                                       |
| 1,19 | LY75-CD302;<br>CD302; LY75        | LY75-CD302 readthrough; CD302 molecule; lymphocyte antigen 75                                                                                                      |
| 1,19 | DMKN                              | dermokine                                                                                                                                                          |
| 1,19 | AJUBA                             | ajuba LIM protein                                                                                                                                                  |
| 1,19 | KCNJ3                             | potassium channel, inwardly rectifying subfamily J, member 3                                                                                                       |
| 1,19 | ABCB11                            | ATP binding cassette subfamily B member 11                                                                                                                         |
| 1,19 | USP17L28;<br>USP17L5;<br>USP17L24 | ubiquitin specific peptidase 17-like family member 28; ubiquitin specific peptidase 17-like family member 5; ubiquitin specific peptidase 17-like family member 24 |
| 1,19 | LIPK                              | lipase, family member K                                                                                                                                            |
| 1,19 | KCNJ18                            | potassium channel, inwardly rectifying subfamily J, member 18                                                                                                      |
| 1,19 | C6orf201                          | chromosome 6 open reading frame 201                                                                                                                                |
| 1,19 | PGPEP1L                           | pyroglutamyl-peptidase I-like                                                                                                                                      |
| 1,19 | EZH1                              | enhancer of zeste 1 polycomb repressive complex 2 subunit                                                                                                          |
| 1,19 | ANKRD20A4                         | ankyrin repeat domain 20 family, member A4                                                                                                                         |
| 1,19 | JAKMIP2-AS1                       | JAKMIP2 antisense RNA 1                                                                                                                                            |
| 1,19 | OR10G4                            | olfactory receptor, family 10, subfamily G, member 4                                                                                                               |
| 1,19 | KCNJ4                             | potassium channel, inwardly rectifying subfamily J, member 4                                                                                                       |
| 1,19 | FBXO8                             | Transcript Identified by AceView, Entrez Gene ID(s) 26269                                                                                                          |
| 1,19 | ANKRD20A3;<br>ANKRD20A2           | ankyrin repeat domain 20 family, member A3; ankyrin repeat domain 20 family, member A2                                                                             |
| 1,19 | DGAT2                             | diacylglycerol O-acyltransferase 2                                                                                                                                 |
| 1,19 | DAPK1                             | death-associated protein kinase 1                                                                                                                                  |
| 1,19 | ZNF808;<br>RPL39P34               | zinc finger protein 808; ribosomal protein L39 pseudogene 34                                                                                                       |
| 1,19 | FAM47B                            | family with sequence similarity 47, member B                                                                                                                       |

|      |                              |                                                                                            |
|------|------------------------------|--------------------------------------------------------------------------------------------|
| 1,19 | LYPD3                        | LY6/PLAUR domain containing 3                                                              |
| 1,19 | RP11-295G24.4;<br>GFI1B      | Transcript Identified by AceView, Entrez Gene ID(s)<br>8328; novel transcript              |
| 1,19 | PLIN5                        | perilipin 5                                                                                |
| 1,19 | C8B                          | complement component 8, beta polypeptide                                                   |
| 1,19 | PRPS1L1                      | phosphoribosyl pyrophosphate synthetase 1-like 1                                           |
| 1,19 | CLVS2                        | clavesin 2                                                                                 |
| 1,19 | LOC100130357;<br>RP1-257A7.4 | uncharacterized LOC100130357; novel transcript,<br>antisense to PHACTR1                    |
| 1,19 | DEFB134                      | defensin, beta 134                                                                         |
| 1,19 | FCN3                         | ficolin (collagen/fibrinogen domain containing) 3                                          |
| 1,19 | ANO2                         | anoctamin 2, calcium activated chloride channel                                            |
| 1,19 | SNX15                        | sorting nexin 15                                                                           |
| 1,19 | OR51B4                       | olfactory receptor, family 51, subfamily B, member 4                                       |
| 1,19 | SLFN11                       | schlafen family member 11                                                                  |
| 1,19 | KRTCAP3                      | keratinocyte associated protein 3                                                          |
| 1,19 | GAPT                         | GRB2-binding adaptor protein, transmembrane                                                |
| 1,19 | IL18RAP                      | interleukin 18 receptor accessory protein                                                  |
| 1,19 | HNRNPCL2                     | heterogeneous nuclear ribonucleoprotein C-like 2<br>[Source:HGNC Symbol;Acc:HGNC:48813]    |
| 1,19 | GOLGA7B                      | golgin A7 family, member B                                                                 |
| 1,19 | CLDN1                        | claudin 1                                                                                  |
| 1,19 | RUNX1                        | runt-related transcription factor 1                                                        |
| 1,19 | ZNF736                       | zinc finger protein 736                                                                    |
| 1,19 | HDAC6                        | Memczak2013 ANTISENSE, CDS, coding,<br>INTERNAL best transcript NM_006044                  |
| 1,19 | ZNF546                       | zinc finger protein 546                                                                    |
| 1,19 | CDH3                         | cadherin 3, type 1, P-cadherin (placental)                                                 |
| 1,19 | MS4A4E                       | membrane-spanning 4-domains, subfamily A, member<br>4E                                     |
| 1,19 | SPDYE16                      | speedy/RINGO cell cycle regulator family member E16<br>[Source:HGNC Symbol;Acc:HGNC:51512] |
| 1,19 | DPCR1                        | diffuse panbronchiolitis critical region 1                                                 |
| 1,19 | OR2AG1                       | olfactory receptor, family 2, subfamily AG, member 1<br>(gene/pseudogene)                  |
| 1,19 | HSFY2                        | heat shock transcription factor, Y-linked 2                                                |
| 1,19 | MALL                         | mal, T-cell differentiation protein-like                                                   |
| 1,19 | FAM180B                      | family with sequence similarity 180, member B                                              |
| 1,19 | SCT                          | secretin                                                                                   |
| 1,19 | MPP5                         | membrane protein, palmitoylated 5                                                          |
| 1,19 | DAW1                         | dynein assembly factor with WDR repeat domains 1                                           |
| 1,19 | CDH11                        | cadherin 11, type 2, OB-cadherin (osteoblast)                                              |
| 1,19 | JAZF1                        | Memczak2013 ANTISENSE, coding, INTERNAL,<br>intronic best transcript NM_175061             |
| 1,19 | CRYBA2                       | crystallin beta A2                                                                         |
| 1,19 | LIMK1                        | Memczak2013 ANTISENSE, CDS, coding,<br>INTERNAL best transcript NM_001204426               |
| 1,19 | ILDR2                        | immunoglobulin-like domain containing receptor 2                                           |
| 1,19 | GSTA1                        | glutathione S-transferase alpha 1                                                          |

|      |                            |                                                                                                                     |
|------|----------------------------|---------------------------------------------------------------------------------------------------------------------|
| 1,19 | FAM231C;<br>FAM231A        | family with sequence similarity 231, member C; family with sequence similarity 231, member A                        |
| 1,19 | RASD2                      | Memczak2013 ANTISENSE, coding, INTERNAL, UTR3 best transcript NM_014310                                             |
| 1,19 | GHRHR                      | growth hormone releasing hormone receptor                                                                           |
| 1,19 | WRB                        | tryptophan rich basic protein                                                                                       |
| 1,19 | DGKB                       | diacylglycerol kinase, beta 90kDa                                                                                   |
| 1,19 | SYT15                      | synaptotagmin XV                                                                                                    |
| 1,19 | TM9SF3                     | transmembrane 9 superfamily member 3                                                                                |
| 1,19 | DPY19L2                    | dpy-19-like 2 (C. elegans)                                                                                          |
| 1,19 | C3orf49                    | chromosome 3 open reading frame 49                                                                                  |
| 1,19 | CSRP3                      | cysteine and glycine-rich protein 3 (cardiac LIM protein)                                                           |
| 1,19 | PRAMEF6                    | PRAME family member 6 [Source:HGNC Symbol;Acc:HGNC:30583]                                                           |
| 1,19 | PRAMEF6                    | PRAME family member 6 [Source:HGNC Symbol;Acc:HGNC:30583]                                                           |
| 1,19 | PDE1A                      | Transcript Identified by AceView, Entrez Gene ID(s) 5136                                                            |
| 1,19 | SLC35A4                    | solute carrier family 35, member A4                                                                                 |
| 1,19 | OR1L4                      | olfactory receptor, family 1, subfamily L, member 4                                                                 |
| 1,19 | APOC3                      | apolipoprotein C-III                                                                                                |
| 1,19 | TCP10L2                    | t-complex 10-like 2                                                                                                 |
| 1,19 | ZPBP                       | zona pellucida binding protein                                                                                      |
| 1,19 | ADM                        | adrenomedullin                                                                                                      |
| 1,19 | FAM20A                     | family with sequence similarity 20, member A                                                                        |
| 1,19 | DYX1C1                     | dyslexia susceptibility 1 candidate 1                                                                               |
| 1,19 | ADGRG5                     | adhesion G protein-coupled receptor G5                                                                              |
| 1,19 | TOX3                       | TOX high mobility group box family member 3                                                                         |
| 1,19 | IL17B                      | interleukin 17B                                                                                                     |
| 1,19 | WFS1                       | Wolfram syndrome 1 (wolframin)                                                                                      |
| 1,19 | UBE2D3                     | Memczak2013 ANTISENSE, coding, INTERNAL, intronic best transcript NM_181893                                         |
| 1,19 | LOC388780;<br>RP11-128M1.1 | uncharacterized LOC388780; putative novel transcript                                                                |
| 1,19 | MUC15                      | mucin 15, cell surface associated                                                                                   |
| 1,19 | FSD1L                      | fibronectin type III and SPRY domain containing 1-like                                                              |
| 1,19 | NTN4                       | netrin 4                                                                                                            |
| 1,19 | CACNG7                     | calcium channel, voltage-dependent, gamma subunit 7                                                                 |
| 1,19 | DNAH6                      | Transcript Identified by AceView, Entrez Gene ID(s) 1768                                                            |
| 1,19 | MROH7; TTC4;<br>MROH7-TTC4 | maestro heat-like repeat family member 7; tetratricopeptide repeat domain 4; MROH7-TTC4 readthrough (NMD candidate) |
| 1,19 | EARS2                      | glutamyl-tRNA synthetase 2, mitochondrial                                                                           |
| 1,19 | SPTA1                      | spectrin, alpha, erythrocytic 1                                                                                     |
| 1,19 | OR5M9                      | olfactory receptor, family 5, subfamily M, member 9                                                                 |
| 1,19 | FGFBP3                     | fibroblast growth factor binding protein 3                                                                          |
| 1,19 | KCNE3                      | potassium channel, voltage gated subfamily E regulatory beta subunit 3                                              |

|      |                         |                                                                                                                     |
|------|-------------------------|---------------------------------------------------------------------------------------------------------------------|
| 1,19 | TSSK3                   | testis-specific serine kinase 3                                                                                     |
| 1,19 | AP1S1                   | Transcript Identified by AceView, Entrez Gene ID(s)<br>1174                                                         |
| 1,19 | HAO2                    | hydroxyacid oxidase 2 (long chain)                                                                                  |
| 1,19 | SHISA2                  | shisa family member 2                                                                                               |
| 1,19 | TTN                     | titin                                                                                                               |
| 1,19 | KHK                     | ketoheokinase                                                                                                       |
| 1,19 | OR6T1                   | olfactory receptor, family 6, subfamily T, member 1                                                                 |
| 1,19 | SLC8A2                  | solute carrier family 8 (sodium/calcium exchanger),<br>member 2                                                     |
| 1,19 | HOXD11                  | homeobox D11                                                                                                        |
| 1,19 | FBL                     | fibrillarlin                                                                                                        |
| 1,19 | PTPN2                   | Transcript Identified by AceView, Entrez Gene ID(s)<br>5771                                                         |
| 1,19 | GABRA4                  | gamma-aminobutyric acid (GABA) A receptor, alpha 4                                                                  |
| 1,19 | MAP3K15                 | mitogen-activated protein kinase kinase kinase 15                                                                   |
| 1,19 | POSTN                   | periostin, osteoblast specific factor                                                                               |
| 1,19 | GUCY2D                  | guanylate cyclase 2D, membrane (retina-specific)                                                                    |
| 1,19 | TP53TG3C                | TP53 target 3C                                                                                                      |
| 1,19 | MARCH1                  | Memczak2013 ANTISENSE, coding, INTERNAL,<br>intronic best transcript NM_001166373                                   |
| 1,19 | CDK12                   | Transcript Identified by AceView, Entrez Gene ID(s)<br>51755                                                        |
| 1,19 | ORMDL3                  | ORMDL sphingolipid biosynthesis regulator 3                                                                         |
| 1,19 | HOXD12                  | homeobox D12                                                                                                        |
| 1,19 | IQCA1                   | Transcript Identified by AceView, Entrez Gene ID(s)<br>79781                                                        |
| 1,19 | SPATA31A7;<br>SPATA31A5 | SPATA31 subfamily A, member 7; SPATA31<br>subfamily A, member 5                                                     |
| 1,19 | CD34                    | CD34 molecule                                                                                                       |
| 1,19 | AP4S1                   | adaptor-related protein complex 4, sigma 1 subunit                                                                  |
| 1,19 | KAT6B                   | K(lysine) acetyltransferase 6B                                                                                      |
| 1,19 | HSPB6                   | heat shock protein, alpha-crystallin-related, B6                                                                    |
| 1,19 | TARSL2                  | threonyl-tRNA synthetase-like 2                                                                                     |
| 1,19 | F8A2; F8A3;<br>F8A1     | coagulation factor VIII-associated 2; coagulation factor<br>VIII-associated 3; coagulation factor VIII-associated 1 |
| 1,19 | SMIM8                   | small integral membrane protein 8                                                                                   |
| 1,19 | LRFN2                   | leucine rich repeat and fibronectin type III domain<br>containing 2                                                 |
| 1,19 | CCDC162P                | coiled-coil domain containing 162, pseudogene                                                                       |
| 1,19 | PRR35                   | proline rich 35                                                                                                     |
| 1,18 | OAF                     | out at first homolog                                                                                                |
| 1,18 | MSMO1                   | methylsterol monooxygenase 1                                                                                        |
| 1,18 | KIAA1468                | KIAA1468                                                                                                            |
| 1,18 | CSN1S1                  | casein alpha s1                                                                                                     |
| 1,18 | CCND1                   | cyclin D1                                                                                                           |
| 1,18 | C1orf141                | chromosome 1 open reading frame 141                                                                                 |
| 1,18 | KRBA1                   | KRAB-A domain containing 1                                                                                          |

|      |                                  |                                                                                                                                                                                                   |
|------|----------------------------------|---------------------------------------------------------------------------------------------------------------------------------------------------------------------------------------------------|
| 1,18 | MIXL1                            | Mix paired-like homeobox                                                                                                                                                                          |
| 1,18 | REM1                             | RAS (RAD and GEM)-like GTP-binding 1                                                                                                                                                              |
| 1,18 | PII5                             | peptidase inhibitor 15                                                                                                                                                                            |
| 1,18 | GABRG1                           | gamma-aminobutyric acid (GABA) A receptor, gamma 1                                                                                                                                                |
| 1,18 | VAMP1                            | vesicle associated membrane protein 1                                                                                                                                                             |
| 1,18 | TAF1L                            | TAF1 RNA polymerase II, TATA box binding protein (TBP)-associated factor, 210kDa-like                                                                                                             |
| 1,18 | C3orf35                          | chromosome 3 open reading frame 35                                                                                                                                                                |
| 1,18 | GALM                             | galactose mutarotase (aldose 1-epimerase)                                                                                                                                                         |
| 1,18 | GLB1L3                           | galactosidase beta 1 like 3                                                                                                                                                                       |
| 1,18 | GCLC                             | glutamate-cysteine ligase, catalytic subunit                                                                                                                                                      |
| 1,18 | MAGEA12;<br>CSAG4                | MAGE family member A12; CSAG family, member 4 (pseudogene)                                                                                                                                        |
| 1,18 | LEUTX                            | leucine twenty homeobox                                                                                                                                                                           |
| 1,18 | NUAK2                            | NUAK family, SNF1-like kinase, 2                                                                                                                                                                  |
| 1,18 | UBE2J2                           | Transcript Identified by AceView, Entrez Gene ID(s) 118424                                                                                                                                        |
| 1,18 | RBM1Y1D;<br>RBM1Y1B;<br>RBM1Y1A1 | RNA binding motif protein, Y-linked, family 1, member D; RNA binding motif protein, Y-linked, family 1, member B; RNA binding motif protein, Y-linked, family 1, member A1                        |
| 1,18 | FAM19A1                          | family with sequence similarity 19 (chemokine (C-C motif)-like), member A1                                                                                                                        |
| 1,18 | SERTAD4                          | SERTA domain containing 4                                                                                                                                                                         |
| 1,18 | FIBCD1                           | fibrinogen C domain containing 1                                                                                                                                                                  |
| 1,18 | DKFZp779M0652<br>; CTD-2210P24.4 | uncharacterized DKFZp779M0652; Transcript Identified by AceView, Entrez Gene ID(s) 374387, RefSeq ID(s) NR_027134; novel transcript; uncharacterized DKFZp779M0652 [Source:EntrezGene;Acc:374387] |
| 1,18 | TMEM212                          | transmembrane protein 212                                                                                                                                                                         |
| 1,18 | SPRED3                           | sprouty-related, EVH1 domain containing 3                                                                                                                                                         |
| 1,18 | ARRDC5                           | arrestin domain containing 5                                                                                                                                                                      |
| 1,18 | COL24A1                          | collagen, type XXIV, alpha 1                                                                                                                                                                      |
| 1,18 | KCNE1                            | potassium channel, voltage gated subfamily E regulatory beta subunit 1                                                                                                                            |
| 1,18 | ATP12A                           | ATPase, H <sup>+</sup> /K <sup>+</sup> transporting, nongastric, alpha polypeptide                                                                                                                |
| 1,18 | DEFA1B;<br>DEFA1; DEFA3          | defensin, alpha 1B; defensin, alpha 1; defensin, alpha 3, neutrophil-specific                                                                                                                     |
| 1,18 | DEFA1; DEFA1B                    | defensin, alpha 1; defensin, alpha 1B                                                                                                                                                             |
| 1,18 | WNT2B                            | wingless-type MMTV integration site family, member 2B                                                                                                                                             |
| 1,18 | USP9X                            | Memczak2013 ANTISENSE, CDS, coding, INTERNAL best transcript NM_001039590                                                                                                                         |
| 1,18 | SEMA3E                           | sema domain, immunoglobulin domain (Ig), short basic domain, secreted, (semaphorin) 3E                                                                                                            |

|      |                           |                                                                                                                                                                                                                                                                                              |
|------|---------------------------|----------------------------------------------------------------------------------------------------------------------------------------------------------------------------------------------------------------------------------------------------------------------------------------------|
| 1,18 | SYT15; ABC7-42404400C24.1 | Homo sapiens synaptotagmin XV (SYT15), transcript variant a, mRNA.; Homo sapiens synaptotagmin XV (SYT15), transcript variant b, mRNA.; Homo sapiens synaptotagmin XV, mRNA (cDNA clone MGC:164845 IMAGE:40147906), complete cds.; Synaptotagmin-15 [Source:UniProtKB/Swiss-Prot;Acc:Q9BQS2] |
| 1,18 | PUS7                      | pseudouridylate synthase 7 (putative)                                                                                                                                                                                                                                                        |
| 1,18 | CLRN1                     | clarin 1                                                                                                                                                                                                                                                                                     |
| 1,18 | ACKR4                     | atypical chemokine receptor 4                                                                                                                                                                                                                                                                |
| 1,18 | RBP7                      | retinol binding protein 7, cellular                                                                                                                                                                                                                                                          |
| 1,18 | MFSD5                     | major facilitator superfamily domain containing 5                                                                                                                                                                                                                                            |
| 1,18 | KCNH3                     | potassium channel, voltage gated eag related subfamily H, member 3                                                                                                                                                                                                                           |
| 1,18 | CEP76                     | centrosomal protein 76kDa                                                                                                                                                                                                                                                                    |
| 1,18 | FAM188A                   | family with sequence similarity 188, member A                                                                                                                                                                                                                                                |
| 1,18 | SRRM5                     | serine/arginine repetitive matrix 5                                                                                                                                                                                                                                                          |
| 1,18 | MADD                      | MAP-kinase activating death domain                                                                                                                                                                                                                                                           |
| 1,18 | IQCF5                     | IQ motif containing F5                                                                                                                                                                                                                                                                       |
| 1,18 | ARHGAP25                  | Rho GTPase activating protein 25                                                                                                                                                                                                                                                             |
| 1,18 | UPK1A-AS1                 | UPK1A antisense RNA 1                                                                                                                                                                                                                                                                        |
| 1,18 | GPC6                      | Transcript Identified by AceView, Entrez Gene ID(s) 10082                                                                                                                                                                                                                                    |
| 1,18 | MUC17                     | mucin 17, cell surface associated                                                                                                                                                                                                                                                            |
| 1,18 | LPIN1                     | Transcript Identified by AceView, Entrez Gene ID(s) 23175                                                                                                                                                                                                                                    |
| 1,18 | C1orf61; RP11-98G7.1      | Transcript Identified by AceView, Entrez Gene ID(s) 10485; novel transcript                                                                                                                                                                                                                  |
| 1,18 | GPLD1                     | glycosylphosphatidylinositol specific phospholipase D1                                                                                                                                                                                                                                       |
| 1,18 | GUCY1A2                   | guanylate cyclase 1, soluble, alpha 2                                                                                                                                                                                                                                                        |
| 1,18 | PLA2G4E                   | phospholipase A2, group IVE                                                                                                                                                                                                                                                                  |
| 1,18 | NRSN2-AS1                 | NRSN2 antisense RNA 1                                                                                                                                                                                                                                                                        |
| 1,18 | POGZ                      | Transcript Identified by AceView, Entrez Gene ID(s) 23126                                                                                                                                                                                                                                    |
| 1,18 | ELL3                      | elongation factor RNA polymerase II-like 3                                                                                                                                                                                                                                                   |
| 1,18 | PATL1                     | protein associated with topoisomerase II homolog 1 (yeast)                                                                                                                                                                                                                                   |
| 1,18 | CHN2                      | chimerin 2                                                                                                                                                                                                                                                                                   |
| 1,18 | DRAXIN                    | dorsal inhibitory axon guidance protein                                                                                                                                                                                                                                                      |
| 1,18 | CCT8L2                    | chaperonin containing TCP1, subunit 8 (theta)-like 2                                                                                                                                                                                                                                         |
| 1,18 | ODAM                      | odontogenic, ameloblast associated                                                                                                                                                                                                                                                           |
| 1,18 | ZBTB7C                    | zinc finger and BTB domain containing 7C                                                                                                                                                                                                                                                     |
| 1,18 | SALL1                     | spalt-like transcription factor 1                                                                                                                                                                                                                                                            |
| 1,18 | ALS2                      | ALS2, alsin Rho guanine nucleotide exchange factor                                                                                                                                                                                                                                           |
| 1,18 | TMCO6                     | transmembrane and coiled-coil domains 6                                                                                                                                                                                                                                                      |
| 1,18 | AEBP1; MIR4649            | AE binding protein 1; microRNA 4649                                                                                                                                                                                                                                                          |
| 1,18 | ANP32D                    | acidic nuclear phosphoprotein 32 family member D                                                                                                                                                                                                                                             |
| 1,18 | SDSL                      | serine dehydratase-like                                                                                                                                                                                                                                                                      |
| 1,18 | CTSK                      | cathepsin K                                                                                                                                                                                                                                                                                  |

|      |                       |                                                                                                   |
|------|-----------------------|---------------------------------------------------------------------------------------------------|
| 1,18 | OR6C68                | olfactory receptor, family 6, subfamily C, member 68                                              |
| 1,18 | GAB3                  | GRB2-associated binding protein 3                                                                 |
| 1,18 | DUOX2                 | dual oxidase 2                                                                                    |
| 1,18 | A2ML1                 | alpha-2-macroglobulin-like 1                                                                      |
| 1,18 | LTB                   | lymphotoxin beta (TNF superfamily, member 3)                                                      |
| 1,18 | ACADL                 | acyl-CoA dehydrogenase, long chain                                                                |
| 1,18 | NOS1                  | nitric oxide synthase 1 (neuronal)                                                                |
| 1,18 | THSD7A                | thrombospondin type 1 domain containing 7A                                                        |
| 1,18 | SPINK7                | serine peptidase inhibitor, Kazal type 7 (putative)                                               |
| 1,18 | CT55                  | cancer/testis antigen 55                                                                          |
| 1,18 | RTN4RL1               | reticulon 4 receptor-like 1                                                                       |
| 1,18 | SAG                   | S-antigen; retina and pineal gland (arrestin)                                                     |
| 1,18 | TGIF2LX               | TGFB-induced factor homeobox 2-like, X-linked                                                     |
| 1,18 | SPARCL1               | SPARC like 1                                                                                      |
| 1,18 | TMEM30C               | transmembrane protein 30C                                                                         |
| 1,18 | MEIOC                 | meiosis specific with coiled-coil domain                                                          |
| 1,18 | TNNI3K                | TNNI3 interacting kinase                                                                          |
| 1,18 | CD36                  | CD36 molecule (thrombospondin receptor)                                                           |
| 1,18 | HRASLS5               | HRAS-like suppressor family, member 5                                                             |
| 1,18 | ACBD7                 | acyl-CoA binding domain containing 7                                                              |
| 1,18 | GABRR1                | gamma-aminobutyric acid (GABA) A receptor, rho 1                                                  |
| 1,18 | DOHH                  | deoxyhypusine hydroxylase/monooxygenase                                                           |
| 1,18 | FXVD2                 | FXVD domain containing ion transport regulator 2                                                  |
| 1,18 | CD52                  | CD52 molecule                                                                                     |
| 1,18 | LINC00851             | long intergenic non-protein coding RNA 851                                                        |
| 1,18 | RGMA                  | repulsive guidance molecule family member a                                                       |
| 1,18 | WLS                   | Jeck2013 ALT_ACCEPTOR, ALT_DONOR, coding, INTERNAL, intronic, OVERLAPTX best transcript NM_024911 |
| 1,18 | CST2                  | cystatin SA                                                                                       |
| 1,18 | MRS2                  | MRS2 magnesium transporter                                                                        |
| 1,18 | REXO4                 | REX4 homolog, 3'-5' exonuclease [Source:HGNC Symbol;Acc:HGNC:12820]                               |
| 1,18 | C2orf88               | chromosome 2 open reading frame 88                                                                |
| 1,18 | GAGE4; GAGE7; GAGE12G | G antigen 4; G antigen 7; G antigen 12G                                                           |
| 1,18 | ARHGEF19              | Rho guanine nucleotide exchange factor 19                                                         |
| 1,18 | OLFM2                 | olfactomedin 2                                                                                    |
| 1,18 | MEOX1                 | mesenchyme homeobox 1                                                                             |
| 1,18 | ZNF85                 | zinc finger protein 85                                                                            |
| 1,18 | ABCC10                | ATP binding cassette subfamily C member 10                                                        |
| 1,18 | SAG                   | S-antigen; retina and pineal gland (arrestin)                                                     |
| 1,18 | OR2V2                 | olfactory receptor, family 2, subfamily V, member 2                                               |
| 1,18 | PAGE1                 | P antigen family, member 1 (prostate associated)                                                  |
| 1,18 | TRADD                 | TNFRSF1A-associated via death domain                                                              |
| 1,18 | API5L1                | Transcript Identified by AceView, Entrez Gene ID(s) 642812                                        |
| 1,18 | TTC29                 | tetratricopeptide repeat domain 29                                                                |
| 1,18 | SSTR4                 | somatostatin receptor 4                                                                           |

|      |                                                                                                                                                                                                                                                                        |                                                                                                                                                                                                                                                                                                                                                                                                                                                                                                                                                                                                                                                                                                                                                                                                                           |
|------|------------------------------------------------------------------------------------------------------------------------------------------------------------------------------------------------------------------------------------------------------------------------|---------------------------------------------------------------------------------------------------------------------------------------------------------------------------------------------------------------------------------------------------------------------------------------------------------------------------------------------------------------------------------------------------------------------------------------------------------------------------------------------------------------------------------------------------------------------------------------------------------------------------------------------------------------------------------------------------------------------------------------------------------------------------------------------------------------------------|
| 1,18 | RHOBTB3                                                                                                                                                                                                                                                                | Rho-related BTB domain containing 3                                                                                                                                                                                                                                                                                                                                                                                                                                                                                                                                                                                                                                                                                                                                                                                       |
| 1,18 | EVC2                                                                                                                                                                                                                                                                   | Ellis van Creveld syndrome 2                                                                                                                                                                                                                                                                                                                                                                                                                                                                                                                                                                                                                                                                                                                                                                                              |
| 1,18 | TUBA8                                                                                                                                                                                                                                                                  | tubulin, alpha 8                                                                                                                                                                                                                                                                                                                                                                                                                                                                                                                                                                                                                                                                                                                                                                                                          |
| 1,18 | GML                                                                                                                                                                                                                                                                    | glycosylphosphatidylinositol anchored molecule like                                                                                                                                                                                                                                                                                                                                                                                                                                                                                                                                                                                                                                                                                                                                                                       |
| 1,18 | FCGR1B                                                                                                                                                                                                                                                                 | Fc fragment of IgG, high affinity Ib, receptor (CD64)                                                                                                                                                                                                                                                                                                                                                                                                                                                                                                                                                                                                                                                                                                                                                                     |
| 1,18 | ALK                                                                                                                                                                                                                                                                    | Transcript Identified by AceView, Entrez Gene ID(s) 238                                                                                                                                                                                                                                                                                                                                                                                                                                                                                                                                                                                                                                                                                                                                                                   |
| 1,18 | SLC27A6                                                                                                                                                                                                                                                                | solute carrier family 27 (fatty acid transporter), member 6                                                                                                                                                                                                                                                                                                                                                                                                                                                                                                                                                                                                                                                                                                                                                               |
| 1,18 | MIF-AS1                                                                                                                                                                                                                                                                | MIF antisense RNA 1                                                                                                                                                                                                                                                                                                                                                                                                                                                                                                                                                                                                                                                                                                                                                                                                       |
| 1,18 | SAXO1                                                                                                                                                                                                                                                                  | stabilizer of axonemal microtubules 1                                                                                                                                                                                                                                                                                                                                                                                                                                                                                                                                                                                                                                                                                                                                                                                     |
| 1,18 | ZFP57                                                                                                                                                                                                                                                                  | ZFP57 zinc finger protein                                                                                                                                                                                                                                                                                                                                                                                                                                                                                                                                                                                                                                                                                                                                                                                                 |
| 1,18 | OR11H4                                                                                                                                                                                                                                                                 | olfactory receptor, family 11, subfamily H, member 4                                                                                                                                                                                                                                                                                                                                                                                                                                                                                                                                                                                                                                                                                                                                                                      |
| 1,18 | TRIM22                                                                                                                                                                                                                                                                 | Memczak2013 ANTISENSE, CDS, coding, INTERNAL, UTR5 best transcript NM_001199573                                                                                                                                                                                                                                                                                                                                                                                                                                                                                                                                                                                                                                                                                                                                           |
| 1,18 | OR4E1                                                                                                                                                                                                                                                                  | olfactory receptor family 4 subfamily E member 1 (gene/pseudogene) [Source:HGNC Symbol;Acc:HGNC:8296]                                                                                                                                                                                                                                                                                                                                                                                                                                                                                                                                                                                                                                                                                                                     |
| 1,18 | SLC31A2                                                                                                                                                                                                                                                                | solute carrier family 31 (copper transporter), member 2                                                                                                                                                                                                                                                                                                                                                                                                                                                                                                                                                                                                                                                                                                                                                                   |
| 1,18 | FCER1G                                                                                                                                                                                                                                                                 | Fc fragment of IgE, high affinity I, receptor for; gamma polypeptide                                                                                                                                                                                                                                                                                                                                                                                                                                                                                                                                                                                                                                                                                                                                                      |
| 1,18 | UNG                                                                                                                                                                                                                                                                    | uracil DNA glycosylase                                                                                                                                                                                                                                                                                                                                                                                                                                                                                                                                                                                                                                                                                                                                                                                                    |
| 1,18 | TMEM196                                                                                                                                                                                                                                                                | transmembrane protein 196                                                                                                                                                                                                                                                                                                                                                                                                                                                                                                                                                                                                                                                                                                                                                                                                 |
| 1,18 | CNRIP1                                                                                                                                                                                                                                                                 | cannabinoid receptor interacting protein 1                                                                                                                                                                                                                                                                                                                                                                                                                                                                                                                                                                                                                                                                                                                                                                                |
| 1,18 | CTGF                                                                                                                                                                                                                                                                   | connective tissue growth factor                                                                                                                                                                                                                                                                                                                                                                                                                                                                                                                                                                                                                                                                                                                                                                                           |
| 1,18 | CNR1                                                                                                                                                                                                                                                                   | cannabinoid receptor 1 (brain)                                                                                                                                                                                                                                                                                                                                                                                                                                                                                                                                                                                                                                                                                                                                                                                            |
| 1,18 | C10orf90                                                                                                                                                                                                                                                               | chromosome 10 open reading frame 90                                                                                                                                                                                                                                                                                                                                                                                                                                                                                                                                                                                                                                                                                                                                                                                       |
| 1,18 | LPCAT2                                                                                                                                                                                                                                                                 | lysophosphatidylcholine acyltransferase 2                                                                                                                                                                                                                                                                                                                                                                                                                                                                                                                                                                                                                                                                                                                                                                                 |
| 1,18 | PCDHGC3;<br>PCDHGA12;<br>PCDHGB4;<br>PCDHGA8;<br>PCDHGA1;<br>PCDHGA10;<br>PCDHGA11;<br>PCDHGA2;<br>PCDHGA3;<br>PCDHGA4;<br>PCDHGA5;<br>PCDHGA6;<br>PCDHGA7;<br>PCDHGA9;<br>PCDHGB1;<br>PCDHGB2;<br>PCDHGB3;<br>PCDHGB5;<br>PCDHGB6;<br>PCDHGB7;<br>PCDHGC4;<br>PCDHGC5 | protocadherin gamma subfamily C, 3; protocadherin gamma subfamily A, 12; protocadherin gamma subfamily B, 4; protocadherin gamma subfamily A, 8; protocadherin gamma subfamily A, 1; protocadherin gamma subfamily A, 10; protocadherin gamma subfamily A, 11; protocadherin gamma subfamily A, 2; protocadherin gamma subfamily A, 3; protocadherin gamma subfamily A, 4; protocadherin gamma subfamily A, 5; protocadherin gamma subfamily A, 6; protocadherin gamma subfamily A, 7; protocadherin gamma subfamily A, 9; protocadherin gamma subfamily B, 1; protocadherin gamma subfamily B, 2; protocadherin gamma subfamily B, 3; protocadherin gamma subfamily B, 5; protocadherin gamma subfamily B, 6; protocadherin gamma subfamily B, 7; protocadherin gamma subfamily C, 4; protocadherin gamma subfamily C, 5 |

|      |               |                                                                                                      |
|------|---------------|------------------------------------------------------------------------------------------------------|
| 1,18 | ATG16L1       | autophagy related 16-like 1                                                                          |
| 1,18 | SHISA4        | shisa family member 4                                                                                |
| 1,18 | COL20A1       | collagen, type XX, alpha 1                                                                           |
| 1,18 | COL6A1        | collagen, type VI, alpha 1                                                                           |
| 1,18 | ADGRL3        | adhesion G protein-coupled receptor L3                                                               |
| 1,18 | FAM216B       | family with sequence similarity 216, member B                                                        |
| 1,18 | CXCL8         | chemokine (C-X-C motif) ligand 8                                                                     |
| 1,17 | MOK           | MOK protein kinase                                                                                   |
| 1,17 | CGB2          | chorionic gonadotropin, beta polypeptide 2                                                           |
| 1,17 | CNGB3         | cyclic nucleotide gated channel beta 3                                                               |
| 1,17 | SIGLEC7       | sialic acid binding Ig-like lectin 7                                                                 |
| 1,17 | AIF1L         | allograft inflammatory factor 1-like                                                                 |
| 1,17 | CCDC66        | coiled-coil domain containing 66                                                                     |
| 1,17 | CDH8          | cadherin 8, type 2                                                                                   |
| 1,17 | LIMS3L; LIMS3 | LIM and senescent cell antigen-like domains 3-like;<br>LIM and senescent cell antigen-like domains 3 |
| 1,17 | GPR151        | G protein-coupled receptor 151                                                                       |
| 1,17 | TSNARE1       | t-SNARE domain containing 1                                                                          |
| 1,17 | LRRN4         | leucine rich repeat neuronal 4                                                                       |
| 1,17 | PRR4          | proline rich 4 (lacrimal)                                                                            |
| 1,17 | IGFLR1        | IGF like family receptor 1                                                                           |
| 1,17 | LRTM2         | leucine-rich repeats and transmembrane domains 2                                                     |
| 1,17 | MSH2          | mutS homolog 2                                                                                       |
| 1,17 | MMRN1         | multimerin 1                                                                                         |
| 1,17 | GNG4          | guanine nucleotide binding protein (G protein), gamma 4                                              |
| 1,17 | OSBPL1A       | Transcript Identified by AceView, Entrez Gene ID(s)<br>114876                                        |
| 1,17 | TTLL2         | tubulin tyrosine ligase-like family member 2                                                         |
| 1,17 | SMIM10L2B     | small integral membrane protein 10 like 2B                                                           |
| 1,17 | NCR1          | natural cytotoxicity triggering receptor 1                                                           |
| 1,17 | EFNA2         | ephrin-A2                                                                                            |
| 1,17 | SAMSN1        | SAM domain, SH3 domain and nuclear localization<br>signals 1                                         |
| 1,17 | RETNLB        | resistin like beta                                                                                   |
| 1,17 | TNFSF14       | tumor necrosis factor (ligand) superfamily, member 14                                                |
| 1,17 | PSMF1         | proteasome inhibitor subunit 1                                                                       |
| 1,17 | HSPG2         | Jeck2013 ANTISENSE, CDS, coding, INTERNAL,<br>intronic, OVCODE, OVEXON best transcript<br>NM_005529  |
| 1,17 | MAST1         | microtubule associated serine/threonine kinase 1                                                     |
| 1,17 | RRAD          | Ras-related associated with diabetes                                                                 |
| 1,17 | LY6G5C        | lymphocyte antigen 6 complex, locus G5C                                                              |
| 1,17 | GAGE1         | G antigen 1                                                                                          |
| 1,17 | FAM189B       | family with sequence similarity 189, member B                                                        |
| 1,17 | CEMIP         | cell migration inducing protein, hyaluronan binding                                                  |
| 1,17 | DUSP15        | dual specificity phosphatase 15                                                                      |
| 1,17 | SLC24A2       | solute carrier family 24 (sodium/potassium/calcium<br>exchanger), member 2                           |

|      |                                        |                                                                                                                              |
|------|----------------------------------------|------------------------------------------------------------------------------------------------------------------------------|
| 1,17 | DPM2                                   | dolichyl-phosphate mannosyltransferase polypeptide 2, regulatory subunit                                                     |
| 1,17 | PPM1E                                  | protein phosphatase, Mg <sup>2+</sup> /Mn <sup>2+</sup> dependent, 1E                                                        |
| 1,17 | ZNF684                                 | zinc finger protein 684                                                                                                      |
| 1,17 | ARSH                                   | arylsulfatase family, member H                                                                                               |
| 1,17 | SERPINA9                               | serpin peptidase inhibitor, clade A (alpha-1 antiproteinase, antitrypsin), member 9                                          |
| 1,17 | C17orf75                               | chromosome 17 open reading frame 75                                                                                          |
| 1,17 | SYCP2L                                 | synaptonemal complex protein 2-like                                                                                          |
| 1,17 | CALHM1                                 | calcium homeostasis modulator 1                                                                                              |
| 1,17 | GRIA1                                  | Transcript Identified by AceView, Entrez Gene ID(s) 2890                                                                     |
| 1,17 | TGM4                                   | transglutaminase 4                                                                                                           |
| 1,17 | DEFB119                                | defensin, beta 119                                                                                                           |
| 1,17 | MYF6                                   | myogenic factor 6 (herculin)                                                                                                 |
| 1,17 | GRIN3A                                 | glutamate receptor, ionotropic, N-methyl-D-aspartate 3A                                                                      |
| 1,17 | GRK1                                   | G protein-coupled receptor kinase 1                                                                                          |
| 1,17 | EVPL                                   | envoplakin                                                                                                                   |
| 1,17 | ATF7IP2                                | activating transcription factor 7 interacting protein 2                                                                      |
| 1,17 | PRRT3                                  | proline-rich transmembrane protein 3                                                                                         |
| 1,17 | CEACAM8                                | carcinoembryonic antigen-related cell adhesion molecule 8                                                                    |
| 1,17 | ARPP21                                 | Transcript Identified by AceView, Entrez Gene ID(s) 10777                                                                    |
| 1,17 | SEC31B                                 | SEC31 homolog B, COPII coat complex component                                                                                |
| 1,17 | GABRR2                                 | gamma-aminobutyric acid (GABA) A receptor, rho 2                                                                             |
| 1,17 | LSP1; MIR7847                          | lymphocyte-specific protein 1; microRNA 7847                                                                                 |
| 1,17 | WDR26                                  | Transcript Identified by AceView, Entrez Gene ID(s) 80232                                                                    |
| 1,17 | IGF2; INS-IGF2                         | insulin-like growth factor 2; INS-IGF2 readthrough                                                                           |
| 1,17 | MYCN                                   | v-myc avian myelocytomatosis viral oncogene neuroblastoma derived homolog                                                    |
| 1,17 | SMCP                                   | sperm mitochondria-associated cysteine-rich protein                                                                          |
| 1,17 | PSG8                                   | pregnancy specific beta-1-glycoprotein 8                                                                                     |
| 1,17 | LOC100506127; RP11-111M22.2; LOC387790 | putative uncharacterized protein FLJ37770-like; Transcript Identified by AceView, Entrez Gene ID(s) 387790; novel transcript |
| 1,17 | SLC4A11                                | solute carrier family 4, sodium borate transporter, member 11                                                                |
| 1,17 | LILRA2                                 | leukocyte immunoglobulin-like receptor, subfamily A (with TM domain), member 2                                               |
| 1,17 | KRTAP13-3                              | keratin associated protein 13-3                                                                                              |
| 1,17 | SPATA6                                 | spermatogenesis associated 6                                                                                                 |
| 1,17 | OR2H2                                  | olfactory receptor, family 2, subfamily H, member 2                                                                          |
| 1,17 | ATG16L1                                | autophagy related 16-like 1                                                                                                  |
| 1,17 | TNFRSF17                               | tumor necrosis factor receptor superfamily, member 17                                                                        |
| 1,17 | PRAMEF6                                | PRAME family member 6 [Source:HGNC Symbol;Acc:HGNC:30583]                                                                    |
| 1,17 | RAD9A                                  | RAD9 checkpoint clamp component A                                                                                            |

|      |                                              |                                                                                                                                 |
|------|----------------------------------------------|---------------------------------------------------------------------------------------------------------------------------------|
| 1,17 | PGBD5                                        | piggyBac transposable element derived 5                                                                                         |
| 1,17 | SOX8                                         | SRY box 8                                                                                                                       |
| 1,17 | FBXO16                                       | F-box protein 16                                                                                                                |
| 1,17 | PDIK1L                                       | PDLIM1 interacting kinase 1 like                                                                                                |
| 1,17 | SMAGP                                        | small cell adhesion glycoprotein                                                                                                |
| 1,17 | PP2D1                                        | protein phosphatase 2C-like domain containing 1                                                                                 |
| 1,17 | AFAP1L2                                      | actin filament associated protein 1-like 2                                                                                      |
| 1,17 | CTXN2                                        | cortexin 2                                                                                                                      |
| 1,17 | CBLN2                                        | cerebellin 2 precursor                                                                                                          |
| 1,17 | GAS6                                         | growth arrest-specific 6                                                                                                        |
| 1,17 | AKR1B15                                      | aldo-keto reductase family 1, member B15                                                                                        |
| 1,17 | ZNF775                                       | zinc finger protein 775                                                                                                         |
| 1,17 | PID1                                         | phosphotyrosine interaction domain containing 1                                                                                 |
| 1,17 | MGAM                                         | maltase-glucoamylase                                                                                                            |
| 1,17 | TXLNB                                        | taxilin beta                                                                                                                    |
| 1,17 | GALR1                                        | galanin receptor 1                                                                                                              |
| 1,17 | MAGED4;<br>MAGED4B;<br>SNORA11D;<br>SNORA11E | melanoma antigen family D4; melanoma antigen family D4B; small nucleolar RNA, H/ACA box 11D; small nucleolar RNA, H/ACA box 11E |
| 1,17 | SCN11A                                       | sodium channel, voltage gated, type XI alpha subunit                                                                            |
| 1,17 | BMPR1B                                       | bone morphogenetic protein receptor type IB                                                                                     |
| 1,17 | PSG3                                         | pregnancy specific beta-1-glycoprotein 3                                                                                        |
| 1,17 | BFSP2                                        | beaded filament structural protein 2, phakinin                                                                                  |
| 1,17 | ZNF208                                       | zinc finger protein 208                                                                                                         |
| 1,17 | OCA2                                         | oculocutaneous albinism II                                                                                                      |
| 1,17 | PLEKHH3                                      | pleckstrin homology domain containing, family H (with MyTH4 domain) member 3                                                    |
| 1,17 | KLRC2                                        | killer cell lectin-like receptor subfamily C, member 2                                                                          |
| 1,17 | SEPN1                                        | selenoprotein N, 1                                                                                                              |
| 1,17 | POGZ                                         | Transcript Identified by AceView, Entrez Gene ID(s) 23126                                                                       |
| 1,17 | RBM11                                        | RNA binding motif protein 11                                                                                                    |
| 1,17 | PLEK                                         | pleckstrin                                                                                                                      |
| 1,17 | SLC44A4                                      | solute carrier family 44, member 4                                                                                              |
| 1,17 | PAQR5                                        | progesterone and adipoQ receptor family member V                                                                                |
| 1,17 | WNT11                                        | wingless-type MMTV integration site family, member 11                                                                           |
| 1,17 | TEX28                                        | testis expressed 28                                                                                                             |
| 1,17 | ZNF491                                       | zinc finger protein 491                                                                                                         |
| 1,17 | CST6                                         | cystatin E/M                                                                                                                    |
| 1,17 | AMY2A                                        | amylase, alpha 2A (pancreatic)                                                                                                  |
| 1,17 | CHST13                                       | carbohydrate (chondroitin 4) sulfotransferase 13                                                                                |
| 1,17 | TBX20                                        | T-box 20                                                                                                                        |
| 1,17 | OR10H5                                       | olfactory receptor, family 10, subfamily H, member 5                                                                            |
| 1,17 | CDH16                                        | cadherin 16, KSP-cadherin                                                                                                       |
| 1,17 | LRP2BP                                       | LRP2 binding protein                                                                                                            |
| 1,17 | KBTBD3                                       | kelch repeat and BTB (POZ) domain containing 3                                                                                  |
| 1,17 | SRMS                                         | src-related kinase lacking C-terminal regulatory tyrosine and N-terminal myristylation sites                                    |

|      |                     |                                                                                                           |
|------|---------------------|-----------------------------------------------------------------------------------------------------------|
| 1,17 | PLEKHD1             | pleckstrin homology domain containing, family D (with coiled-coil domains) member 1                       |
| 1,17 | TP53INP1            | tumor protein p53 inducible nuclear protein 1                                                             |
| 1,17 | IQCF3               | IQ motif containing F3                                                                                    |
| 1,17 | SOX15               | SRY box 15                                                                                                |
| 1,17 | KCNK10              | potassium channel, two pore domain subfamily K, member 10                                                 |
| 1,17 | TCP10L              | t-complex 10-like                                                                                         |
| 1,17 | CSN2                | casein beta                                                                                               |
| 1,17 | SRY                 | sex determining region Y                                                                                  |
| 1,17 | CRABP1              | cellular retinoic acid binding protein 1                                                                  |
| 1,17 | EXOC3               | exocyst complex component 3                                                                               |
| 1,17 | WFDC12              | WAP four-disulfide core domain 12                                                                         |
| 1,17 | TCEAL5              | transcription elongation factor A (SII)-like 5                                                            |
| 1,17 | OR5H1               | olfactory receptor, family 5, subfamily H, member 1                                                       |
| 1,17 | TGM5                | transglutaminase 5                                                                                        |
| 1,17 | FCHO1               | Memczak2013 ANTISENSE, coding, intronic, upstream_start, UTR5 best transcript NM_001161357                |
| 1,17 | PTGDR2              | prostaglandin D2 receptor 2                                                                               |
| 1,17 | ZPBP                | zona pellucida binding protein                                                                            |
| 1,17 | ROBO3               | roundabout guidance receptor 3                                                                            |
| 1,17 | VAMP5               | vesicle associated membrane protein 5                                                                     |
| 1,17 | PIPOX               | pipecolic acid oxidase                                                                                    |
| 1,17 | WTIP                | Wilms tumor 1 interacting protein                                                                         |
| 1,17 | CSPP1               | centrosome and spindle pole associated protein 1                                                          |
| 1,17 | ORAI1               | ORAI calcium release-activated calcium modulator 1                                                        |
| 1,17 | PRICKLE1            | prickle homolog 1                                                                                         |
| 1,17 | CKMT2               | creatine kinase, mitochondrial 2 (sarcomeric)                                                             |
| 1,17 | EDA                 | ectodysplasin A                                                                                           |
| 1,17 | BBS1                | Bardet-Biedl syndrome 1                                                                                   |
| 1,17 | METTL18             | methyltransferase like 18                                                                                 |
| 1,17 | SAMD9L              | sterile alpha motif domain containing 9-like                                                              |
| 1,17 | ZNF25               | zinc finger protein 25                                                                                    |
| 1,17 | AC007566.10; GATAD1 | Transcript Identified by AceView, Entrez Gene ID(s) 57798; novel transcript, antisense to ERVW-1 and PEX1 |
| 1,17 | TBK1                | TANK-binding kinase 1                                                                                     |
| 1,17 | ISYNA1              | inositol-3-phosphate synthase 1                                                                           |
| 1,17 | SNTG2               | syntrophin, gamma 2                                                                                       |
| 1,17 | LINC00612           | long intergenic non-protein coding RNA 612                                                                |
| 1,17 | PPDPF               | pancreatic progenitor cell differentiation and proliferation factor                                       |
| 1,17 | ARAF                | A-Raf proto-oncogene, serine/threonine kinase                                                             |
| 1,17 | OR10R2              | olfactory receptor, family 10, subfamily R, member 2                                                      |
| 1,17 | TRPV6               | transient receptor potential cation channel, subfamily V, member 6                                        |
| 1,17 | KRTAP19-1           | keratin associated protein 19-1                                                                           |
| 1,17 | FUK                 | fucokinase                                                                                                |
| 1,17 | PPARG               | peroxisome proliferator-activated receptor gamma                                                          |

|      |                  |                                                                                                   |
|------|------------------|---------------------------------------------------------------------------------------------------|
| 1,17 | USP28            | ubiquitin specific peptidase 28                                                                   |
| 1,17 | ERAP2            | endoplasmic reticulum aminopeptidase 2                                                            |
| 1,17 | MARCH3           | membrane associated ring finger 3                                                                 |
| 1,17 | BTRC             | beta-transducin repeat containing E3 ubiquitin protein ligase                                     |
| 1,17 | ANKRD33B         | ankyrin repeat domain 33B                                                                         |
| 1,17 | CRYGB            | crystallin gamma B                                                                                |
| 1,17 | CCDC70           | coiled-coil domain containing 70                                                                  |
| 1,17 | LYN              | LYN proto-oncogene, Src family tyrosine kinase                                                    |
| 1,17 | ZNF546           | zinc finger protein 546                                                                           |
| 1,17 | ACTL6B           | actin-like 6B                                                                                     |
| 1,17 | FBXO17           | F-box protein 17                                                                                  |
| 1,17 | OR10H1           | olfactory receptor, family 10, subfamily H, member 1                                              |
| 1,17 | VPREB3           | pre-B lymphocyte 3                                                                                |
| 1,17 | MXD4             | Memczak2013 ALT_ACCEPTOR, ALT_DONOR, coding, INTERNAL, intronic best transcript NM_006454         |
| 1,17 | KRTAP10-4        | keratin associated protein 10-4                                                                   |
| 1,17 | ZBTB39           | zinc finger and BTB domain containing 39                                                          |
| 1,17 | SLC29A2          | solute carrier family 29 (equilibrative nucleoside transporter), member 2                         |
| 1,17 | TMEM144          | transmembrane protein 144                                                                         |
| 1,17 | TDRD6            | tudor domain containing 6                                                                         |
| 1,17 | C3orf18          | chromosome 3 open reading frame 18                                                                |
| 1,17 | ATXN2L           | Transcript Identified by AceView, Entrez Gene ID(s) 11273                                         |
| 1,17 | MAP1S            | microtubule-associated protein 1S                                                                 |
| 1,17 | RENBP            | renin binding protein                                                                             |
| 1,17 | SLMAP            | sarcolemma associated protein                                                                     |
| 1,16 | TCEANC2; MIR4781 | transcription elongation factor A (SII) N-terminal and central domain containing 2; microRNA 4781 |
| 1,16 | OR12D2           | olfactory receptor, family 12, subfamily D, member 2 (gene/pseudogene)                            |
| 1,16 | NKAP             | NFkB activating protein                                                                           |
| 1,16 | DARS2            | aspartyl-tRNA synthetase 2, mitochondrial                                                         |
| 1,16 | CNBD2            | cyclic nucleotide binding domain containing 2                                                     |
| 1,16 | SORBS2           | Transcript Identified by AceView, Entrez Gene ID(s) 8470                                          |
| 1,16 | ANO3             | anoctamin 3                                                                                       |
| 1,16 | FAM177A1         | family with sequence similarity 177, member A1                                                    |
| 1,16 | STMN2            | stathmin 2                                                                                        |
| 1,16 | BCL2L14          | BCL2-like 14 (apoptosis facilitator)                                                              |
| 1,16 | ZNF774           | zinc finger protein 774                                                                           |
| 1,16 | ATG4B            | autophagy related 4B, cysteine peptidase                                                          |
| 1,16 | GABRG2           | gamma-aminobutyric acid (GABA) A receptor, gamma 2                                                |
| 1,16 | KCNK2            | potassium channel, two pore domain subfamily K, member 2                                          |
| 1,16 | CPNE4            | Transcript Identified by AceView, Entrez Gene ID(s) 131034                                        |

|      |                           |                                                                                                                      |
|------|---------------------------|----------------------------------------------------------------------------------------------------------------------|
| 1,16 | LIPM                      | lipase, family member M                                                                                              |
| 1,16 | FBXL21                    | F-box and leucine-rich repeat protein 21<br>(gene/pseudogene)                                                        |
| 1,16 | CELF2                     | CUGBP, Elav-like family member 2                                                                                     |
| 1,16 | RPS6KA1                   | ribosomal protein S6 kinase, 90kDa, polypeptide 1                                                                    |
| 1,16 | TYW5                      | tRNA-yW synthesizing protein 5                                                                                       |
| 1,16 | PHOSPHO2                  | phosphatase, orphan 2                                                                                                |
| 1,16 | SLC35B3                   | solute carrier family 35 (adenosine 3-phospho 5-phosphosulfate transporter), member B3                               |
| 1,16 | F11                       | coagulation factor XI                                                                                                |
| 1,16 | GATA6                     | GATA binding protein 6                                                                                               |
| 1,16 | ELOVL1;<br>MIR6734        | ELOVL fatty acid elongase 1; microRNA 6734                                                                           |
| 1,16 | DCDC5; DCDC1              | doublecortin domain containing 5; doublecortin domain containing 1                                                   |
| 1,16 | FZR1                      | Jeck2013 ANTISENSE, coding, INTERNAL, intronic best transcript NM_016263                                             |
| 1,16 | AC208162.1                |                                                                                                                      |
| 1,16 | CTSS                      | cathepsin S                                                                                                          |
| 1,16 | SPATA31A1                 | SPATA31 subfamily A, member 1                                                                                        |
| 1,16 | C21orf91;<br>C21orf91-OT1 | chromosome 21 open reading frame 91; C21orf91 overlapping transcript 1                                               |
| 1,16 | F8A2                      | coagulation factor VIII-associated 2                                                                                 |
| 1,16 | GNG7                      | Memczak2013 ALT_ACCEPTOR, ALT_DONOR, coding, INTERNAL, intronic best transcript NM_052847                            |
| 1,16 | HEPN1                     | hepatocellular carcinoma, down-regulated 1                                                                           |
| 1,16 | MYL1                      | myosin light chain 1                                                                                                 |
| 1,16 | CSMD2                     | CUB and Sushi multiple domains 2                                                                                     |
| 1,16 | GSDMB                     | gasdermin B                                                                                                          |
| 1,16 | GSTM4                     | glutathione S-transferase mu 4                                                                                       |
| 1,16 | MAN1B1-AS1                | MAN1B1 antisense RNA 1 (head to head)                                                                                |
| 1,16 | MMP8                      | matrix metalloproteinase 8                                                                                           |
| 1,16 | C11orf88                  | chromosome 11 open reading frame 88                                                                                  |
| 1,16 | LRRC10                    | leucine rich repeat containing 10                                                                                    |
| 1,16 | SLC16A12                  | solute carrier family 16, member 12                                                                                  |
| 1,16 | EPB41L3                   | erythrocyte membrane protein band 4.1-like 3                                                                         |
| 1,16 | OR1E1                     | olfactory receptor, family 1, subfamily E, member 1                                                                  |
| 1,16 | NOL6                      | nucleolar protein 6 (RNA-associated)                                                                                 |
| 1,16 | OR2T27                    | olfactory receptor, family 2, subfamily T, member 27                                                                 |
| 1,16 | AC008753.6;<br>MYADM      | Memczak2013 ANTISENSE, coding, INTERNAL, intronic best transcript NM_001020819; novel transcript, antisense to MYADM |
| 1,16 | ZIC1                      | Zic family member 1                                                                                                  |
| 1,16 | PRSS23                    | protease, serine, 23                                                                                                 |
| 1,16 | GPR62                     | G protein-coupled receptor 62                                                                                        |
| 1,16 | IKBKB                     | Transcript Identified by AceView, Entrez Gene ID(s) 3551                                                             |
| 1,16 | DUSP16                    | dual specificity phosphatase 16                                                                                      |
| 1,16 | RBM43                     | RNA binding motif protein 43                                                                                         |

|      |          |                                                                               |
|------|----------|-------------------------------------------------------------------------------|
| 1,16 | USP26    | ubiquitin specific peptidase 26                                               |
| 1,16 | FMO4     | flavin containing monooxygenase 4                                             |
| 1,16 | sep-04   | septin 4                                                                      |
| 1,16 | NLRP3    | NLR family, pyrin domain containing 3                                         |
| 1,16 | CLPSL1   | colipase-like 1                                                               |
| 1,16 | PRAMEF4  | PRAME family member 4                                                         |
| 1,16 | ISG20L2  | interferon stimulated exonuclease gene 20kDa like 2                           |
| 1,16 | TRAPPC4  | trafficking protein particle complex 4                                        |
| 1,16 | DIO2     | deiodinase, iodothyronine, type II                                            |
| 1,16 | POTEE    | POTE ankyrin domain family, member E                                          |
| 1,16 | TMEM169  | Transcript Identified by AceView, Entrez Gene ID(s)<br>92691                  |
| 1,16 | SPPL3    | signal peptide peptidase like 3                                               |
| 1,16 | TRMT44   | tRNA methyltransferase 44 homolog (S. cerevisiae)                             |
| 1,16 | ERVK13-1 | endogenous retrovirus group K13, member 1                                     |
| 1,16 | DYTN     | dystrotelin                                                                   |
| 1,16 | STXBP6   | syntaxin binding protein 6 (amisyn)                                           |
| 1,16 | LTBP4    | Transcript Identified by AceView, Entrez Gene ID(s)<br>8425                   |
| 1,16 | POTEB    | POTE ankyrin domain family, member B                                          |
| 1,16 | B3GNT2   | UDP-GlcNAc:betaGal beta-1,3-N-acetylglucosaminyltransferase 2                 |
| 1,16 | ASMTL    | acetylserotonin O-methyltransferase-like                                      |
| 1,16 | ASMTL    | acetylserotonin O-methyltransferase-like                                      |
| 1,16 | CASZ1    | castor zinc finger 1                                                          |
| 1,16 | EDNRA    | endothelin receptor type A                                                    |
| 1,16 | SELL     | selectin L                                                                    |
| 1,16 | TIMP1    | TIMP metallopeptidase inhibitor 1                                             |
| 1,16 | MAGEB6   | MAGE family member B6                                                         |
| 1,16 | CLCNKA   | chloride channel, voltage-sensitive Ka                                        |
| 1,16 | ZNF680   | zinc finger protein 680                                                       |
| 1,16 | CCDC155  | coiled-coil domain containing 155                                             |
| 1,16 | OR8S1    | olfactory receptor, family 8, subfamily S, member 1                           |
| 1,16 | TFAP2C   | transcription factor AP-2 gamma (activating enhancer binding protein 2 gamma) |
| 1,16 | DPT      | dermatopontin                                                                 |
| 1,16 | BTBD10   | BTB (POZ) domain containing 10                                                |
| 1,16 | PPIE     | Transcript Identified by AceView, Entrez Gene ID(s)<br>10450                  |
| 1,16 | DCP1A    | decapping mRNA 1A                                                             |
| 1,16 | STX17    | syntaxin 17                                                                   |
| 1,16 | OR4L1    | olfactory receptor, family 4, subfamily L, member 1                           |
| 1,16 | CHRM2    | cholinergic receptor, muscarinic 2                                            |
| 1,16 | ZNF705G  | zinc finger protein 705G                                                      |
| 1,16 | HOMEZ    | homeobox and leucine zipper encoding                                          |
| 1,16 | FAM153A  | family with sequence similarity 153, member A                                 |
| 1,16 | USP43    | ubiquitin specific peptidase 43                                               |
| 1,16 | DTNA     | dystrobrevin, alpha                                                           |
| 1,16 | KRT74    | keratin 74, type II                                                           |
| 1,16 | CH25H    | cholesterol 25-hydroxylase                                                    |

|      |                        |                                                                                           |
|------|------------------------|-------------------------------------------------------------------------------------------|
| 1,16 | ST6GALNAC3             | Memczak2013 ANTISENSE, coding, INTERNAL, intronic best transcript NM_152996               |
| 1,16 | ZBTB3                  | zinc finger and BTB domain containing 3                                                   |
| 1,16 | SH2D3A                 | SH2 domain containing 3A                                                                  |
| 1,16 | RTP1                   | receptor (chemosensory) transporter protein 1                                             |
| 1,16 | BMF                    | Bcl2 modifying factor                                                                     |
| 1,16 | KANK4                  | KN motif and ankyrin repeat domains 4                                                     |
| 1,16 | ANK2                   | Transcript Identified by AceView, Entrez Gene ID(s) 287                                   |
| 1,16 | MEF2C                  | myocyte enhancer factor 2C                                                                |
| 1,16 | BCHE                   | butyrylcholinesterase                                                                     |
| 1,16 | C19orf25               | chromosome 19 open reading frame 25                                                       |
| 1,16 | KHDRBS2                | KH domain containing, RNA binding, signal transduction associated 2                       |
| 1,16 | GCKR                   | Transcript Identified by AceView, Entrez Gene ID(s) 2646                                  |
| 1,16 | SYNE1                  | spectrin repeat containing, nuclear envelope 1                                            |
| 1,16 | MDM1                   | Mdm1 nuclear protein                                                                      |
| 1,16 | SLC12A1                | solute carrier family 12 (sodium/potassium/chloride transporter), member 1                |
| 1,16 | C6                     | complement component 6                                                                    |
| 1,16 | EIF4E3                 | eukaryotic translation initiation factor 4E family member 3                               |
| 1,16 | FAM231D;<br>LINC00869  | family with sequence similarity 231, member D; long intergenic non-protein coding RNA 869 |
| 1,16 | ANKRD19P               | ankyrin repeat domain 19, pseudogene                                                      |
| 1,16 | HS6ST2                 | heparan sulfate 6-O-sulfotransferase 2                                                    |
| 1,16 | ZNF830                 | zinc finger protein 830                                                                   |
| 1,16 | ZNF479                 | zinc finger protein 479                                                                   |
| 1,16 | MT1A                   | metallothionein 1A                                                                        |
| 1,16 | VGF                    | VGF nerve growth factor inducible                                                         |
| 1,16 | RP11-9L18.3;<br>FAM78B | Transcript Identified by AceView, Entrez Gene ID(s) 149297; novel transcript              |
| 1,16 | C1orf185               | chromosome 1 open reading frame 185                                                       |
| 1,16 | NDUFA10                | NADH dehydrogenase (ubiquinone) 1 alpha subcomplex, 10, 42kDa                             |
| 1,16 | LRRIQ4                 | leucine-rich repeats and IQ motif containing 4                                            |
| 1,16 | CDA                    | cytidine deaminase                                                                        |
| 1,16 | C21orf62               | chromosome 21 open reading frame 62                                                       |
| 1,16 | SULF2                  | Memczak2013 ANTISENSE, coding, INTERNAL, intronic best transcript NM_001161841            |
| 1,16 | RP11-281A20.2;<br>TLR4 | novel transcript; Transcript Identified by AceView, Entrez Gene ID(s) 7099                |
| 1,16 | GPR39                  | G protein-coupled receptor 39                                                             |
| 1,16 | CLIC3                  | chloride intracellular channel 3                                                          |
| 1,16 | C4orf36                | chromosome 4 open reading frame 36                                                        |
| 1,16 | FAM78B                 | family with sequence similarity 78, member B                                              |
| 1,16 | FMN1                   | formin 1                                                                                  |
| 1,16 | TRDMT1                 | tRNA aspartic acid methyltransferase 1                                                    |
| 1,16 | VEGFC                  | vascular endothelial growth factor C                                                      |

|      |                |                                                                                        |
|------|----------------|----------------------------------------------------------------------------------------|
| 1,16 | MEX3A          | mex-3 RNA binding family member A                                                      |
| 1,16 | PIP4K2A        | phosphatidylinositol-5-phosphate 4-kinase, type II, alpha                              |
| 1,16 | C15orf65       | chromosome 15 open reading frame 65                                                    |
| 1,16 | AAAS           | achalasia, adrenocortical insufficiency, alacrimia                                     |
| 1,16 | OMA1           | OMA1 zinc metallopeptidase                                                             |
| 1,16 | IQCF2          | IQ motif containing F2                                                                 |
| 1,16 | LCN8           | lipocalin 8                                                                            |
| 1,16 | MBLAC1         | metallo-beta-lactamase domain containing 1                                             |
| 1,16 | CCHCR1         | coiled-coil alpha-helical rod protein 1                                                |
| 1,16 | GUCA1A         | guanylate cyclase activator 1A (retina)                                                |
| 1,16 | LMAN2L         | lectin, mannose-binding 2-like                                                         |
| 1,16 | SPATC1         | spermatogenesis and centriole associated 1                                             |
| 1,16 | TNFSF12        | tumor necrosis factor (ligand) superfamily, member 12                                  |
| 1,16 | NANOG          | Nanog homeobox                                                                         |
| 1,16 | ATN1           | atrophin 1                                                                             |
| 1,16 | TGFBR3         | transforming growth factor beta receptor III                                           |
| 1,16 | LYAR           | Lyl antibody reactive                                                                  |
| 1,16 | ORAOV1         | oral cancer overexpressed 1                                                            |
| 1,16 | PHYHD1         | phytanoyl-CoA dioxygenase domain containing 1                                          |
| 1,16 | PLAC8L1        | PLAC8-like 1                                                                           |
| 1,16 | KCNH8          | potassium channel, voltage gated eag related subfamily H, member 8                     |
| 1,16 | NEK5           | NIMA-related kinase 5                                                                  |
| 1,16 | C5orf34        | chromosome 5 open reading frame 34                                                     |
| 1,16 | RFNG           | RFNG O-fucosylpeptide 3-beta-N-acetylglucosaminyltransferase                           |
| 1,16 | TSPAN10        | tetraspanin 10                                                                         |
| 1,16 | PRELID2        | PRELI domain containing 2                                                              |
| 1,16 | ANGPTL5        | angiopoietin like 5                                                                    |
| 1,16 | CRACR2A        | calcium release activated channel regulator 2A                                         |
| 1,16 | FAM133B        | Transcript Identified by AceView, Entrez Gene ID(s) 257415                             |
| 1,16 | RBMXL2         | RNA binding motif protein, X-linked-like 2                                             |
| 1,16 | PTPRZ1         | protein tyrosine phosphatase, receptor-type, Z polypeptide 1                           |
| 1,16 | MSANTD3-TMEFF1 | MSANTD3-TMEFF1 readthrough                                                             |
| 1,16 | ARHGEF10       | Jeck2013 ALT_ACCEPTOR, ALT_DONOR, coding, INTERNAL, intronic best transcript NM_014629 |
| 1,16 | SAG            | S-antigen; retina and pineal gland (arrestin)                                          |
| 1,16 | DNTT           | DNA nucleotidylexotransferase                                                          |
| 1,16 | CALN1          | calneuron 1                                                                            |
| 1,16 | WRN            | Transcript Identified by AceView, Entrez Gene ID(s) 7486                               |
| 1,16 | URGCP          | Salzman2013 ANNOTATED, coding, OVEXON, UTR5 best transcript NM_001077664               |
| 1,16 | SLC22A16       | solute carrier family 22 (organic cation/carnitine transporter), member 16             |

|      |                                 |                                                                                                                                                                                                                                                                                                                                                                                                                                                                                   |
|------|---------------------------------|-----------------------------------------------------------------------------------------------------------------------------------------------------------------------------------------------------------------------------------------------------------------------------------------------------------------------------------------------------------------------------------------------------------------------------------------------------------------------------------|
| 1,16 | SPRY3                           | sprouty RTK signaling antagonist 3                                                                                                                                                                                                                                                                                                                                                                                                                                                |
| 1,16 | SPRY3                           | Homo sapiens sprouty RTK signaling antagonist 3 (SPRY3), transcript variant 1, mRNA.; sprouty homolog 3 (Drosophila) [Source:HGNC Symbol;Acc:HGNC:11271]; Homo sapiens sprouty homolog 3 (Drosophila), mRNA (cDNA clone MGC:97072 IMAGE:7262284), complete cds.; Homo sapiens sprouty homolog 3 (Drosophila), mRNA (cDNA clone MGC:103904 IMAGE:30915293), complete cds.; Homo sapiens sprouty homolog 3 (Drosophila), mRNA (cDNA clone MGC:104063 IMAGE:30915511), complete cds. |
| 1,16 | FAM69A                          | family with sequence similarity 69, member A                                                                                                                                                                                                                                                                                                                                                                                                                                      |
| 1,16 | NCAM1                           | Transcript Identified by AceView, Entrez Gene ID(s) 4684                                                                                                                                                                                                                                                                                                                                                                                                                          |
| 1,16 | MYO1D                           | myosin ID                                                                                                                                                                                                                                                                                                                                                                                                                                                                         |
| 1,16 | FABP2                           | fatty acid binding protein 2, intestinal                                                                                                                                                                                                                                                                                                                                                                                                                                          |
| 1,16 | PPT2; EGFL8; PPT2-EGFL8         | palmitoyl-protein thioesterase 2; EGF-like-domain, multiple 8; PPT2-EGFL8 readthrough (NMD candidate)                                                                                                                                                                                                                                                                                                                                                                             |
| 1,16 | EXOC4                           | exocyst complex component 4                                                                                                                                                                                                                                                                                                                                                                                                                                                       |
| 1,16 | MSANTD3                         | Myb/SANT-like DNA-binding domain containing 3                                                                                                                                                                                                                                                                                                                                                                                                                                     |
| 1,16 | SLC15A5                         | solute carrier family 15, member 5                                                                                                                                                                                                                                                                                                                                                                                                                                                |
| 1,16 | buskee; FAM25D; FAM25E; zawskaw | Transcript Identified by AceView; family with sequence similarity 25, member D [Source:HGNC Symbol;Acc:23588]; family with sequence similarity 25, member E [Source:HGNC Symbol;Acc:HGNC:23587]                                                                                                                                                                                                                                                                                   |
| 1,16 | AMHR2                           | anti-Mullerian hormone receptor, type II                                                                                                                                                                                                                                                                                                                                                                                                                                          |
| 1,16 | CLDN14                          | claudin 14                                                                                                                                                                                                                                                                                                                                                                                                                                                                        |
| 1,16 | NCF2                            | neutrophil cytosolic factor 2                                                                                                                                                                                                                                                                                                                                                                                                                                                     |
| 1,16 | OR5F1                           | olfactory receptor, family 5, subfamily F, member 1                                                                                                                                                                                                                                                                                                                                                                                                                               |
| 1,16 | ASB16-AS1                       | ASB16 antisense RNA 1                                                                                                                                                                                                                                                                                                                                                                                                                                                             |
| 1,16 | UVRAG                           | Memczak2013 ALT_ACCEPTOR, ALT_DONOR, coding, INTERNAL, intronic best transcript NM_003369                                                                                                                                                                                                                                                                                                                                                                                         |
| 1,16 | ALKBH8                          | alkB homolog 8, tRNA methyltransferase                                                                                                                                                                                                                                                                                                                                                                                                                                            |
| 1,16 | TAS2R30; TAS2R43; PRR4          | taste receptor, type 2, member 30; taste receptor, type 2, member 43; proline rich 4 (lacrimal)                                                                                                                                                                                                                                                                                                                                                                                   |
| 1,15 | LPAR3                           | lysophosphatidic acid receptor 3                                                                                                                                                                                                                                                                                                                                                                                                                                                  |
| 1,15 | ZNF415                          | zinc finger protein 415                                                                                                                                                                                                                                                                                                                                                                                                                                                           |
| 1,15 | PARD6B                          | par-6 family cell polarity regulator beta                                                                                                                                                                                                                                                                                                                                                                                                                                         |
| 1,15 | SELV                            | selenoprotein V; selenoprotein V [Source:EntrezGene;Acc:348303]; Transcript Identified by AceView, Entrez Gene ID(s) 348303, RefSeq ID(s) NM_182704                                                                                                                                                                                                                                                                                                                               |
| 1,15 | BORA                            | bora, aurora kinase A activator                                                                                                                                                                                                                                                                                                                                                                                                                                                   |
| 1,15 | MYOM3                           | myomesin 3                                                                                                                                                                                                                                                                                                                                                                                                                                                                        |
| 1,15 | LRP6                            | LDL receptor related protein 6                                                                                                                                                                                                                                                                                                                                                                                                                                                    |
| 1,15 | CYB5D1                          | cytochrome b5 domain containing 1                                                                                                                                                                                                                                                                                                                                                                                                                                                 |

|      |              |                                                                                                                                   |
|------|--------------|-----------------------------------------------------------------------------------------------------------------------------------|
| 1,15 | FBXO36       | Transcript Identified by AceView, Entrez Gene ID(s)<br>130888                                                                     |
| 1,15 | VSTM1        | V-set and transmembrane domain containing 1                                                                                       |
| 1,15 | NLN          | neurolysin (metallopeptidase M3 family)                                                                                           |
| 1,15 | NEU4         | sialidase 4                                                                                                                       |
| 1,15 | CYP2D6       | cytochrome P450, family 2, subfamily D, polypeptide 6                                                                             |
| 1,15 | CD164L2      | CD164 sialomucin-like 2                                                                                                           |
| 1,15 | CLIC2        | chloride intracellular channel 2                                                                                                  |
| 1,15 | CNPY1        | canopy FGF signaling regulator 1                                                                                                  |
| 1,15 | CAMK2N2      | calcium/calmodulin-dependent protein kinase II<br>inhibitor 2                                                                     |
| 1,15 | ANPEP        | alanyl (membrane) aminopeptidase                                                                                                  |
| 1,15 | TRIM51       | tripartite motif-containing 51                                                                                                    |
| 1,15 | NDUFA10      | Memczak2013 ANTISENSE, coding, INTERNAL,<br>intronic best transcript NM_004544                                                    |
| 1,15 | CSTL1        | cystatin-like 1                                                                                                                   |
| 1,15 | KRT83        | keratin 83, type II                                                                                                               |
| 1,15 | ELOVL7       | ELOVL fatty acid elongase 7                                                                                                       |
| 1,15 | FEV          | FEV (ETS oncogene family)                                                                                                         |
| 1,15 | FAM47C       | family with sequence similarity 47, member C                                                                                      |
| 1,15 | RASSF1       | Ras association (RalGDS/AF-6) domain family<br>member 1                                                                           |
| 1,15 | SPOCD1       | SPOC domain containing 1                                                                                                          |
| 1,15 | L3MBTL2      | l(3)mbt-like 2 (Drosophila)                                                                                                       |
| 1,15 | VPS52        | vacuolar protein sorting 52 homolog (S. cerevisiae)                                                                               |
| 1,15 | ZNF514       | zinc finger protein 514                                                                                                           |
| 1,15 | USP51        | ubiquitin specific peptidase 51                                                                                                   |
| 1,15 | OR1N2        | olfactory receptor, family 1, subfamily N, member 2                                                                               |
| 1,15 | ABCG8        | ATP binding cassette subfamily G member 8                                                                                         |
| 1,15 | SEMG1        | semenogelin I                                                                                                                     |
| 1,15 | SKI; kerlabu | Memczak2013 ALT_ACCEPTOR, ALT_DONOR,<br>coding, INTERNAL, intronic best transcript<br>NM_003036; Transcript Identified by AceView |
| 1,15 | WFDC2        | WAP four-disulfide core domain 2                                                                                                  |
| 1,15 | CTTNBP2      | cortactin binding protein 2                                                                                                       |
| 1,15 | ANKDD1A      | ankyrin repeat and death domain containing 1A                                                                                     |
| 1,15 | KRT2         | keratin 2, type II                                                                                                                |
| 1,15 | FBXO44       | F-box protein 44                                                                                                                  |
| 1,15 | TNXA         | tenascin XA (pseudogene)                                                                                                          |
| 1,15 | PSKH2        | protein serine kinase H2                                                                                                          |
| 1,15 | HMBS         | hydroxymethylbilane synthase                                                                                                      |
| 1,15 | POTEG; POTEM | POTE ankyrin domain family, member G; POTE<br>ankyrin domain family, member M                                                     |
| 1,15 | KLK7         | kallikrein related peptidase 7                                                                                                    |
| 1,15 | PIAS3        | protein inhibitor of activated STAT 3                                                                                             |
| 1,15 | HEPACAM2     | HEPACAM family member 2                                                                                                           |
| 1,15 | RPH3A        | rabphilin 3A                                                                                                                      |
| 1,15 | KITLG        | KIT ligand                                                                                                                        |
| 1,15 | CST9         | cystatin 9 (testatin)                                                                                                             |

|      |               |                                                                                               |
|------|---------------|-----------------------------------------------------------------------------------------------|
| 1,15 | SKA3          | spindle and kinetochore associated complex subunit 3                                          |
| 1,15 | TMEM42        | transmembrane protein 42                                                                      |
| 1,15 | INTS9         | integrator complex subunit 9                                                                  |
| 1,15 | FNDC1         | fibronectin type III domain containing 1                                                      |
| 1,15 | XKRY2; XKRY   | X-linked Kx blood group related, Y-linked 2; X-linked Kx blood group related, Y-linked        |
| 1,15 | CELA3B        | chymotrypsin-like elastase family, member 3B                                                  |
| 1,15 | ZNF852        | zinc finger protein 852                                                                       |
| 1,15 | JRKL          | JRK-like                                                                                      |
| 1,15 | RPSAP58; RPSA | ribosomal protein SA pseudogene 58; ribosomal protein SA                                      |
| 1,15 | ZNF805        | zinc finger protein 805                                                                       |
| 1,15 | ATP1B2        | ATPase, Na <sup>+</sup> /K <sup>+</sup> transporting, beta 2 polypeptide                      |
| 1,15 | PRAMEF5       | PRAME family member 5                                                                         |
| 1,15 | MAOB          | monoamine oxidase B                                                                           |
| 1,15 | PZP           | pregnancy-zone protein                                                                        |
| 1,15 | DPP4          | dipeptidyl-peptidase 4                                                                        |
| 1,15 | FOXO4L3       | forkhead box D4-like 3                                                                        |
| 1,15 | CSRNP3        | cysteine-serine-rich nuclear protein 3                                                        |
| 1,15 | FABP5         | fatty acid binding protein 5 (psoriasis-associated)                                           |
| 1,15 | TEX38         | testis expressed 38                                                                           |
| 1,15 | NT5C1A        | 5-nucleotidase, cytosolic 1A                                                                  |
| 1,15 | LINC01089     | long intergenic non-protein coding RNA 1089                                                   |
| 1,15 | MICALCL       | MICAL C-terminal like                                                                         |
| 1,15 | MANBA         | mannosidase, beta A, lysosomal                                                                |
| 1,15 | FCER2         | Fc fragment of IgE, low affinity II, receptor for (CD23)                                      |
| 1,15 | ADRA2B        | adrenoceptor alpha 2B                                                                         |
| 1,15 | ABCC2         | ATP binding cassette subfamily C member 2                                                     |
| 1,15 | BDKRB1        | bradykinin receptor B1                                                                        |
| 1,15 | PLCH2         | phospholipase C, eta 2                                                                        |
| 1,15 | OLAH          | oleoyl-ACP hydrolase                                                                          |
| 1,15 | C4orf51       | chromosome 4 open reading frame 51                                                            |
| 1,15 | ND2           | MTND2                                                                                         |
| 1,15 | CASQ2         | calsequestrin 2 (cardiac muscle)                                                              |
| 1,15 | MUC5AC        | mucin 5AC, oligomeric mucus/gel-forming                                                       |
| 1,15 | JAK3          | Janus kinase 3                                                                                |
| 1,15 | PROSER1       | proline and serine rich 1                                                                     |
| 1,15 | ACAN          | aggrecan                                                                                      |
| 1,15 | NCALD         | neurocalcin delta                                                                             |
| 1,15 | AIM1          | absent in melanoma 1                                                                          |
| 1,15 | SASS6         | SAS-6 centriolar assembly protein                                                             |
| 1,15 | GUF1          | GUF1 homolog, GTPase                                                                          |
| 1,15 | BCL2L14       | BCL2-like 14 (apoptosis facilitator)                                                          |
| 1,15 | PDC           | phosducin                                                                                     |
| 1,15 | MYH9          | Jeck2013 ANTISENSE, CDS, coding, INTERNAL, intronic, OVCODE, OVEXON best transcript NM_002473 |
| 1,15 | C10orf107     | chromosome 10 open reading frame 107                                                          |
| 1,15 | KLHL23        | kelch-like family member 23                                                                   |

|      |                      |                                                                                                  |
|------|----------------------|--------------------------------------------------------------------------------------------------|
| 1,15 | SGF29                | SAGA complex associated factor 29                                                                |
| 1,15 | ZNF780B              | zinc finger protein 780B                                                                         |
| 1,15 | YARS2                | tyrosyl-tRNA synthetase 2, mitochondrial                                                         |
| 1,15 | FAM153B              | family with sequence similarity 153, member B                                                    |
| 1,15 | TEX33                | testis expressed 33                                                                              |
| 1,15 | SIPA1                | signal-induced proliferation-associated 1                                                        |
| 1,15 | GDPGP1               | GDP-D-glucose phosphorylase 1                                                                    |
| 1,15 | SLC11A2              | solute carrier family 11 (proton-coupled divalent metal ion transporter), member 2               |
| 1,15 | TMEM185A             | transmembrane protein 185A                                                                       |
| 1,15 | KCNB2                | potassium channel, voltage gated Shab related subfamily B, member 2                              |
| 1,15 | ZNF764               | zinc finger protein 764                                                                          |
| 1,15 | B3GNT4               | UDP-GlcNAc:betaGal beta-1,3-N-acetylglucosaminyltransferase 4                                    |
| 1,15 | HIVEP1               | human immunodeficiency virus type I enhancer binding protein 1                                   |
| 1,15 | SHOX                 | short stature homeobox                                                                           |
| 1,15 | FSD2                 | fibronectin type III and SPRY domain containing 2                                                |
| 1,15 | USF1                 | upstream transcription factor 1                                                                  |
| 1,15 | CCER2                | coiled-coil glutamate rich protein 2                                                             |
| 1,15 | CRYGC                | crystallin gamma C                                                                               |
| 1,15 | NRP1                 | Transcript Identified by AceView, Entrez Gene ID(s) 8829                                         |
| 1,15 | TEAD3                | TEA domain family member 3                                                                       |
| 1,15 | SPATA33              | spermatogenesis associated 33                                                                    |
| 1,15 | PTGS1                | prostaglandin-endoperoxide synthase 1 (prostaglandin G/H synthase and cyclooxygenase)            |
| 1,15 | SLC6A3               | solute carrier family 6 (neurotransmitter transporter), member 3                                 |
| 1,15 | S100A7L2             | S100 calcium binding protein A7 like 2                                                           |
| 1,15 | CROCC2               | ciliary rootlet coiled-coil, rootletin family member 2 [Source:HGNC Symbol;Acc:HGNC:51677]       |
| 1,15 | SPRYD4               | SPRY domain containing 4                                                                         |
| 1,15 | C2orf78              | chromosome 2 open reading frame 78                                                               |
| 1,15 | HIP1R                | Memczak2013 ALT_ACCEPTOR, ALT_DONOR, coding, INTERNAL, intronic best transcript NM_003959        |
| 1,15 | SFTPC                | surfactant protein C                                                                             |
| 1,15 | CEP164               | centrosomal protein 164kDa                                                                       |
| 1,15 | KIAA0125             | KIAA0125                                                                                         |
| 1,15 | RP11-466A19.5; MYO1D | Transcript Identified by AceView, Entrez Gene ID(s) 4642; novel transcript, sense intronic MYO1D |
| 1,15 | VPS8                 | vacuolar protein sorting 8 homolog (S. cerevisiae)                                               |
| 1,15 | NEUROG2              | neurogenin 2                                                                                     |
| 1,15 | PTPRE                | protein tyrosine phosphatase, receptor type, E                                                   |
| 1,15 | MAP4K1               | mitogen-activated protein kinase kinase kinase kinase 1                                          |
| 1,15 | DPP9-AS1             | DPP9 antisense RNA 1                                                                             |

|      |                                                                  |                                                                                                                                                                                                                                                                                                                  |
|------|------------------------------------------------------------------|------------------------------------------------------------------------------------------------------------------------------------------------------------------------------------------------------------------------------------------------------------------------------------------------------------------|
| 1,15 | GS1-259H13.2;<br>TCONS_12_00026125;<br>TCONS_12_00026126; ZNF655 | transmembrane protein 225-like; Jeck2013 ALT_ACCEPTOR, ALT_DONOR, ncRNA, OVCODE, OVEXON, upstream_start best transcript TCONS_12_00026125; Salzman2013 ANNOTATED, INTERNAL, ncRNA, OVCODE, OVEXON best transcript TCONS_12_00026126; novel transcript; Transcript Identified by AceView, Entrez Gene ID(s) 79027 |
| 1,15 | SLITRK5                                                          | SLIT and NTRK-like family, member 5                                                                                                                                                                                                                                                                              |
| 1,15 | TP73-AS1                                                         | TP73 antisense RNA 1                                                                                                                                                                                                                                                                                             |
| 1,15 | MTRNR2L4                                                         | MT-RNR2-like 4                                                                                                                                                                                                                                                                                                   |
| 1,15 | DIO3                                                             | deiodinase, iodothyronine, type III                                                                                                                                                                                                                                                                              |
| 1,15 | PMS2                                                             | PMS1 homolog 2, mismatch repair system component                                                                                                                                                                                                                                                                 |
| 1,15 | ADGRA3                                                           | adhesion G protein-coupled receptor A3                                                                                                                                                                                                                                                                           |
| 1,15 | CD244                                                            | CD244 molecule, natural killer cell receptor 2B4                                                                                                                                                                                                                                                                 |
| 1,15 | TMEM184C                                                         | transmembrane protein 184C                                                                                                                                                                                                                                                                                       |
| 1,15 | TOE1                                                             | target of EGR1, member 1 (nuclear)                                                                                                                                                                                                                                                                               |
| 1,15 | TBX6                                                             | T-box 6                                                                                                                                                                                                                                                                                                          |
| 1,15 | GNA15                                                            | guanine nucleotide binding protein (G protein), alpha 15 (Gq class)                                                                                                                                                                                                                                              |
| 1,15 | SLC45A3                                                          | solute carrier family 45, member 3                                                                                                                                                                                                                                                                               |
| 1,15 | RGS16                                                            | regulator of G-protein signaling 16                                                                                                                                                                                                                                                                              |
| 1,15 | MLXIPL                                                           | MLX interacting protein-like                                                                                                                                                                                                                                                                                     |
| 1,15 | SLC5A4                                                           | solute carrier family 5 (glucose activated ion channel), member 4                                                                                                                                                                                                                                                |
| 1,15 | PPP2R2B                                                          | protein phosphatase 2, regulatory subunit B, beta                                                                                                                                                                                                                                                                |
| 1,15 | CFHR1                                                            | complement factor H-related 1                                                                                                                                                                                                                                                                                    |
| 1,15 | SLC13A2                                                          | solute carrier family 13 (sodium-dependent dicarboxylate transporter), member 2                                                                                                                                                                                                                                  |
| 1,15 | RFPL4A                                                           | ret finger protein-like 4A                                                                                                                                                                                                                                                                                       |
| 1,15 | PPP6R1                                                           | Memczak2013 ANTISENSE, CDS, coding, INTERNAL best transcript NM_014931                                                                                                                                                                                                                                           |
| 1,15 | C1orf94                                                          | chromosome 1 open reading frame 94                                                                                                                                                                                                                                                                               |
| 1,15 | CHKA                                                             | choline kinase alpha                                                                                                                                                                                                                                                                                             |
| 1,15 | SRRD                                                             | SRR1 domain containing                                                                                                                                                                                                                                                                                           |
| 1,15 | GPR17                                                            | G protein-coupled receptor 17                                                                                                                                                                                                                                                                                    |
| 1,15 | SDR16C5                                                          | short chain dehydrogenase/reductase family 16C, member 5                                                                                                                                                                                                                                                         |
| 1,15 | FOXD4L5                                                          | forkhead box D4-like 5                                                                                                                                                                                                                                                                                           |
| 1,15 | CASP4                                                            | caspase 4                                                                                                                                                                                                                                                                                                        |
| 1,15 | GBA2                                                             | glucosidase, beta (bile acid) 2                                                                                                                                                                                                                                                                                  |
| 1,15 | CCDC3                                                            | coiled-coil domain containing 3                                                                                                                                                                                                                                                                                  |
| 1,15 | FBXL12                                                           | F-box and leucine-rich repeat protein 12                                                                                                                                                                                                                                                                         |
| 1,15 | CYGB; RP11-666A8.8                                               | Transcript Identified by AceView, Entrez Gene ID(s) 114757; novel transcript, antisense to PRCD                                                                                                                                                                                                                  |
| 1,15 | FAM127C                                                          | family with sequence similarity 127, member C                                                                                                                                                                                                                                                                    |
| 1,15 | BBS12                                                            | Bardet-Biedl syndrome 12                                                                                                                                                                                                                                                                                         |
| 1,15 | DNAH11                                                           | dynein, axonemal, heavy chain 11                                                                                                                                                                                                                                                                                 |
| 1,15 | ZNF100                                                           | zinc finger protein 100                                                                                                                                                                                                                                                                                          |
| 1,15 | HSD17B7                                                          | hydroxysteroid (17-beta) dehydrogenase 7                                                                                                                                                                                                                                                                         |

|      |                                       |                                                                                    |
|------|---------------------------------------|------------------------------------------------------------------------------------|
| 1,15 | KCNMA1                                | potassium channel, calcium activated large conductance subfamily M alpha, member 1 |
| 1,15 | C19orf52                              | chromosome 19 open reading frame 52                                                |
| 1,15 | ATP6V0A1;<br>MIR5010                  | ATPase, H <sup>+</sup> transporting, lysosomal V0 subunit a1;<br>microRNA 5010     |
| 1,15 | CTAGE8;<br>CTAGE4                     | CTAGE family, member 8; CTAGE family, member 4                                     |
| 1,15 | CCDC129                               | coiled-coil domain containing 129                                                  |
| 1,15 | ABCG5                                 | ATP binding cassette subfamily G member 5                                          |
| 1,15 | FAM105A                               | family with sequence similarity 105, member A                                      |
| 1,15 | NTN5                                  | netrin 5                                                                           |
| 1,15 | CT62                                  | cancer/testis antigen 62                                                           |
| 1,15 | PATE4                                 | prostate and testis expressed 4                                                    |
| 1,15 | DNAH10OS                              | dynein, axonemal, heavy chain 10 opposite strand                                   |
| 1,15 | CD226                                 | CD226 molecule                                                                     |
| 1,15 | PCDH8                                 | protocadherin 8                                                                    |
| 1,15 | MTFR1                                 | mitochondrial fission regulator 1                                                  |
| 1,15 | ATG16L1                               | autophagy related 16-like 1                                                        |
| 1,15 | PIGM                                  | phosphatidylinositol glycan anchor biosynthesis class M                            |
| 1,15 | EQTN                                  | equatorin, sperm acrosome associated                                               |
| 1,15 | IFNA7                                 | interferon, alpha 7                                                                |
| 1,15 | POU2F2                                | POU class 2 homeobox 2                                                             |
| 1,15 | PKNOX1                                | PBX/knotted 1 homeobox 1                                                           |
| 1,15 | TIGD3                                 | tigger transposable element derived 3                                              |
| 1,15 | PRICKLE3                              | prickle homolog 3                                                                  |
| 1,15 | HELZ2                                 | helicase with zinc finger 2, transcriptional coactivator                           |
| 1,15 | C9orf3; MIR24-1;<br>MIR23B;<br>MIR27B | chromosome 9 open reading frame 3; microRNA 24-1;<br>microRNA 23b; microRNA 27b    |
| 1,15 | ASB7                                  | ankyrin repeat and SOCS box containing 7                                           |
| 1,15 | SLIT2                                 | slit guidance ligand 2                                                             |
| 1,15 | RRS1                                  | ribosome biogenesis regulator homolog                                              |
| 1,15 | RAB11FIP4;<br>MIR4724                 | RAB11 family interacting protein 4 (class II);<br>microRNA 4724                    |
| 1,15 | RPS6KA1                               | ribosomal protein S6 kinase, 90kDa, polypeptide 1                                  |
| 1,15 | PCDHB6                                | protocadherin beta 6                                                               |
| 1,15 | LBX1                                  | ladybird homeobox 1                                                                |
| 1,15 | KAZALD1                               | Kazal-type serine peptidase inhibitor domain 1                                     |
| 1,15 | BEAN1                                 | brain expressed, associated with NEDD4, 1                                          |
| 1,15 | SMIM5                                 | small integral membrane protein 5                                                  |
| 1,15 | PTGFR                                 | prostaglandin F receptor (FP)                                                      |
| 1,15 | LHX3                                  | LIM homeobox 3                                                                     |
| 1,15 | ATP8B3                                | ATPase, aminophospholipid transporter, class I, type 8B, member 3                  |
| 1,15 | TMEM202                               | transmembrane protein 202                                                          |
| 1,15 | TEX13A                                | testis expressed 13A                                                               |
| 1,15 | TMEM244                               | transmembrane protein 244                                                          |

|      |                   |                                                                                            |
|------|-------------------|--------------------------------------------------------------------------------------------|
| 1,15 | EXOC7             | Zhang2013 ALT_ACCEPTOR, ALT_DONOR, coding, INTERNAL, intronic best transcript NM_001145297 |
| 1,15 | PKMYT1            | protein kinase, membrane associated tyrosine/threonine 1                                   |
| 1,15 | C10orf54          | chromosome 10 open reading frame 54                                                        |
| 1,15 | KIAA1107          | KIAA1107                                                                                   |
| 1,15 | NDUFAF6           | NADH dehydrogenase (ubiquinone) complex I, assembly factor 6                               |
| 1,15 | PHLDA2            | pleckstrin homology-like domain, family A, member 2                                        |
| 1,15 | EDARADD           | EDAR-associated death domain                                                               |
| 1,15 | ARHGEF1           | Rho guanine nucleotide exchange factor 1                                                   |
| 1,15 | S100B             | S100 calcium binding protein B                                                             |
| 1,15 | DOCK8             | dedicator of cytokinesis 8                                                                 |
| 1,14 | ATG16L1           | autophagy related 16-like 1                                                                |
| 1,14 | SLC6A5            | solute carrier family 6 (neurotransmitter transporter), member 5                           |
| 1,14 | CFHR5             | complement factor H-related 5                                                              |
| 1,14 | DNM2              | Transcript Identified by AceView, Entrez Gene ID(s) 1785                                   |
| 1,14 | PSMC4             | proteasome 26S subunit, ATPase 4 [Source:HGNC Symbol;Acc:HGNC:9551]                        |
| 1,14 | HNRNPCL4          | heterogeneous nuclear ribonucleoprotein C-like 4                                           |
| 1,14 | LRIG1             |                                                                                            |
| 1,14 | TEKT1             | tektin 1                                                                                   |
| 1,14 | CRHR2             | corticotropin releasing hormone receptor 2                                                 |
| 1,14 | IL17RE            | interleukin 17 receptor E                                                                  |
| 1,14 | CLDN16            | claudin 16                                                                                 |
| 1,14 | SPANXC;<br>SPANXD | SPANX family, member C; SPANX family, member D                                             |
| 1,14 | CXorf65           | chromosome X open reading frame 65                                                         |
| 1,14 | OCM               | oncomodulin                                                                                |
| 1,14 | PSMA3-AS1         | PSMA3 antisense RNA 1                                                                      |
| 1,14 | PDE6A             | phosphodiesterase 6A, cGMP-specific, rod, alpha                                            |
| 1,14 | SERPINB11         | serpin peptidase inhibitor, clade B (ovalbumin), member 11 (gene/pseudogene)               |
| 1,14 | EFCAB10           | EF-hand calcium binding domain 10                                                          |
| 1,14 | BTLA              | B and T lymphocyte associated                                                              |
| 1,14 | OMD               | osteomodulin                                                                               |
| 1,14 | GAST              | gastrin                                                                                    |
| 1,14 | KANK1             | KN motif and ankyrin repeat domains 1                                                      |
| 1,14 | RPS6KA5           | ribosomal protein S6 kinase, 90kDa, polypeptide 5                                          |
| 1,14 | NRGN              | neurogranin (protein kinase C substrate, RC3)                                              |
| 1,14 | GTPBP10           | GTP-binding protein 10 (putative)                                                          |
| 1,14 | ACACA             | Transcript Identified by AceView, Entrez Gene ID(s) 31                                     |
| 1,14 | OR52K2            | olfactory receptor, family 52, subfamily K, member 2                                       |
| 1,14 | UPK1A             | uroplakin 1A                                                                               |
| 1,14 | SYNE2             | spectrin repeat containing, nuclear envelope 2                                             |

|      |           |                                                                                               |
|------|-----------|-----------------------------------------------------------------------------------------------|
| 1,14 | ABAT      | 4-aminobutyrate aminotransferase                                                              |
| 1,14 | ANGPTL4   | angiopoietin like 4                                                                           |
| 1,14 | GDF6      | growth differentiation factor 6                                                               |
| 1,14 | HMBS      | hydroxymethylbilane synthase                                                                  |
| 1,14 | PXMP4     | peroxisomal membrane protein 4                                                                |
| 1,14 | SERPINE1  | serpin peptidase inhibitor, clade E (nexin, plasminogen activator inhibitor type 1), member 1 |
| 1,14 | QRICH2    | glutamine rich 2                                                                              |
| 1,14 | MED14OS   | MED14 opposite strand                                                                         |
| 1,14 | UGT2B28   | UDP glucuronosyltransferase 2 family, polypeptide B28                                         |
| 1,14 | LINC01342 | long intergenic non-protein coding RNA 1342                                                   |
| 1,14 | CNIH3     | cornichon family AMPA receptor auxiliary protein 3                                            |
| 1,14 | PDE7A     | phosphodiesterase 7A                                                                          |
| 1,14 | DYDC1     | DPY30 domain containing 1                                                                     |
| 1,14 | KRTAP9-8  | keratin associated protein 9-8                                                                |
| 1,14 | NRBF2     | nuclear receptor binding factor 2                                                             |
| 1,14 | ZC3H10    | zinc finger CCCH-type containing 10                                                           |
| 1,14 | IFNA17    | interferon, alpha 17                                                                          |
| 1,14 | PTPRJ     | protein tyrosine phosphatase, receptor type, J                                                |
| 1,14 | ENTPD1    | ectonucleoside triphosphate diphosphohydrolase 1                                              |
| 1,14 | TMEM170A  | transmembrane protein 170A                                                                    |
| 1,14 | DAGLB     | diacylglycerol lipase, beta                                                                   |
| 1,14 | E2F5      | E2F transcription factor 5, p130-binding                                                      |
| 1,14 | IL12RB1   | interleukin 12 receptor, beta 1                                                               |
| 1,14 | PRAMEF9   |                                                                                               |
| 1,14 | NEUROD2   | neuronal differentiation 2                                                                    |
| 1,14 | VAX1      | ventral anterior homeobox 1                                                                   |
| 1,14 | SGPP1     | sphingosine-1-phosphate phosphatase 1                                                         |
| 1,14 | HDHD3     | haloacid dehalogenase-like hydrolase domain containing 3                                      |
| 1,14 | SGMS2     | sphingomyelin synthase 2                                                                      |
| 1,14 | SLCO4C1   | solute carrier organic anion transporter family, member 4C1                                   |
| 1,14 | ALG5      | ALG5, dolichyl-phosphate beta-glucosyltransferase                                             |
| 1,14 | NOP2      | NOP2 nucleolar protein                                                                        |
| 1,14 | DEFB118   | defensin, beta 118                                                                            |
| 1,14 | EHF       | ets homologous factor                                                                         |
| 1,14 | SCN5A     | sodium channel, voltage gated, type V alpha subunit                                           |
| 1,14 | SIX5      | SIX homeobox 5                                                                                |
| 1,14 | GPR50     | G protein-coupled receptor 50                                                                 |
| 1,14 | MYOZ1     | myozenin 1                                                                                    |
| 1,14 | CCDC102B  | coiled-coil domain containing 102B                                                            |
| 1,14 | AMIGO2    | adhesion molecule with Ig-like domain 2                                                       |
| 1,14 | REEP2     | receptor accessory protein 2                                                                  |
| 1,14 | NOVA2     | neuro-oncological ventral antigen 2                                                           |
| 1,14 | PNPLA7    | Transcript Identified by AceView, Entrez Gene ID(s) 375775                                    |
| 1,14 | PLTP      | phospholipid transfer protein                                                                 |

|      |          |                                                                        |
|------|----------|------------------------------------------------------------------------|
| 1,14 | SLC39A10 | Transcript Identified by AceView, Entrez Gene ID(s)<br>57181           |
| 1,14 | VPS11    | VPS11, CORVET/HOPS core subunit [Source:HGNC<br>Symbol;Acc:HGNC:14583] |
| 1,14 | OLFML1   | olfactomedin like 1                                                    |
| 1,14 | KCNAB1   | Transcript Identified by AceView, Entrez Gene ID(s)<br>7881            |
| 1,14 | CLK3     | CDC like kinase 3                                                      |
| 1,14 | CLDN15   | claudin 15                                                             |
| 1,14 | MOSPD1   | motile sperm domain containing 1                                       |
| 1,14 | NOCT     | nocturnin                                                              |
| 1,14 | RDH10    | retinol dehydrogenase 10 (all-trans)                                   |
| 1,14 | FBXO33   | F-box protein 33                                                       |
| 1,14 | GADL1    | glutamate decarboxylase like 1                                         |
| 1,14 | SYCP2    | synaptonemal complex protein 2                                         |
| 1,14 | METTL17  | methyltransferase like 17                                              |
| 1,14 | OR11L1   | olfactory receptor, family 11, subfamily L, member 1                   |
| 1,14 | CA11     | carbonic anhydrase XI                                                  |
| 1,14 | RAD9B    | RAD9 checkpoint clamp component B                                      |
| 1,14 | ZNF83    | zinc finger protein 83                                                 |
| 1,14 | IFNA6    | interferon, alpha 6                                                    |
| 1,14 | NFE2L3   | nuclear factor, erythroid 2-like 3                                     |
| 1,14 | CFAP46   | cilia and flagella associated protein 46                               |
| 1,14 | ATP11A   | Transcript Identified by AceView, Entrez Gene ID(s)<br>23250           |
| 1,14 | HSD11B1  | hydroxysteroid (11-beta) dehydrogenase 1                               |
| 1,14 | ZHX2     | zinc fingers and homeoboxes 2                                          |
| 1,14 | OR2L2    | olfactory receptor, family 2, subfamily L, member 2                    |
| 1,14 | CYP27A1  | cytochrome P450, family 27, subfamily A, polypeptide<br>1              |
| 1,14 | MSI1     | musashi RNA binding protein 1                                          |
| 1,14 | ERBB2    | erb-b2 receptor tyrosine kinase 2                                      |
| 1,14 | NTNG1    | netrin G1                                                              |
| 1,14 | MLLT10   | myeloid/lymphoid or mixed-lineage leukemia;<br>translocated to, 10     |
| 1,14 | SLC7A13  | solute carrier family 7 (anionic amino acid transporter),<br>member 13 |
| 1,14 | PNLIP    | pancreatic lipase                                                      |
| 1,14 | TIGD7    | tigger transposable element derived 7                                  |
| 1,14 | AGXT     | alanine-glyoxylate aminotransferase                                    |
| 1,14 | GJB4     | gap junction protein beta 4                                            |
| 1,14 | KLC3     | kinesin light chain 3                                                  |
| 1,14 | PMP2     | peripheral myelin protein 2                                            |
| 1,14 | PIGW     | phosphatidylinositol glycan anchor biosynthesis class<br>W             |
| 1,14 | CTAGE15  | CTAGE family, member 15                                                |
| 1,14 | GLIS1    | GLIS family zinc finger 1                                              |
| 1,14 | DUSP2    | dual specificity phosphatase 2                                         |
| 1,14 | UBD      | ubiquitin D                                                            |
| 1,14 | MTRNR2L2 | MT-RNR2-like 2                                                         |

|      |                     |                                                                                           |
|------|---------------------|-------------------------------------------------------------------------------------------|
| 1,14 | BCL2L14             | BCL2-like 14 (apoptosis facilitator)                                                      |
| 1,14 | TNFRSF9             | tumor necrosis factor receptor superfamily, member 9                                      |
| 1,14 | SSX1                | synovial sarcoma, X breakpoint 1                                                          |
| 1,14 | YIF1A               | Yip1 interacting factor homolog A ( <i>S. cerevisiae</i> )                                |
| 1,14 | SEMG2               | semenogelin II                                                                            |
| 1,14 | TBC1D9              | Memczak2013 ALT_ACCEPTOR, ALT_DONOR, coding, INTERNAL, intronic best transcript NM_015130 |
| 1,14 | JRK                 | Jrk helix-turn-helix protein                                                              |
| 1,14 | SNX18               | sorting nexin 18                                                                          |
| 1,14 | ALPP                | alkaline phosphatase, placental                                                           |
| 1,14 | DOPEY2              | dopey family member 2                                                                     |
| 1,14 | POTEH               | POTE ankyrin domain family, member H                                                      |
| 1,14 | PABPC3              | poly(A) binding protein, cytoplasmic 3                                                    |
| 1,14 | PALM3               | paralemmin 3                                                                              |
| 1,14 | ANKRD7              | ankyrin repeat domain 7                                                                   |
| 1,14 | SLC27A2             | solute carrier family 27 (fatty acid transporter), member 2                               |
| 1,14 | ZNF35               | zinc finger protein 35                                                                    |
| 1,14 | GLIPR1L2            | GLI pathogenesis-related 1 like 2                                                         |
| 1,14 | FHAD1               | forkhead-associated (FHA) phosphopeptide binding domain 1                                 |
| 1,14 | RNF38               | ring finger protein 38                                                                    |
| 1,14 | PCYT2               | phosphate cytidylyltransferase 2, ethanolamine                                            |
| 1,14 | PIAS1               | protein inhibitor of activated STAT 1                                                     |
| 1,14 | USP17L1             | ubiquitin specific peptidase 17-like family member 1                                      |
| 1,14 | KRT84               | keratin 84, type II                                                                       |
| 1,14 | GIMAP8              | GTPase, IMAP family member 8                                                              |
| 1,14 | ABCA10              | ATP binding cassette subfamily A member 10                                                |
| 1,14 | CDC42SE2            | CDC42 small effector 2                                                                    |
| 1,14 | BOD1L2              | biorientation of chromosomes in cell division 1-like 2                                    |
| 1,14 | C12orf74            | chromosome 12 open reading frame 74                                                       |
| 1,14 | CCDC69              | coiled-coil domain containing 69                                                          |
| 1,14 | KRTAP5-3            | keratin associated protein 5-3                                                            |
| 1,14 | NFS1                | NFS1 cysteine desulfurase                                                                 |
| 1,14 | C2orf88             | chromosome 2 open reading frame 88                                                        |
| 1,14 | PIK3CG              | phosphatidylinositol-4,5-bisphosphate 3-kinase, catalytic subunit gamma                   |
| 1,14 | ISX                 | intestine-specific homeobox                                                               |
| 1,14 | TMEM136             | transmembrane protein 136                                                                 |
| 1,14 | PPP1R10             | protein phosphatase 1, regulatory subunit 10                                              |
| 1,14 | CAMK1D              | Memczak2013 ALT_ACCEPTOR, ALT_DONOR, coding, INTERNAL, intronic best transcript NM_020397 |
| 1,14 | SNAIL               | snail family zinc finger 1                                                                |
| 1,14 | VWA2                | von Willebrand factor A domain containing 2                                               |
| 1,14 | DNAJC30             | DnaJ (Hsp40) homolog, subfamily C, member 30                                              |
| 1,14 | AMPD3               | adenosine monophosphate deaminase 3                                                       |
| 1,14 | SULT1A4;<br>SULT1A3 | sulfotransferase family 1A member 4; sulfotransferase family 1A member 3                  |

|      |                                |                                                                             |
|------|--------------------------------|-----------------------------------------------------------------------------|
| 1,14 | MSH4                           | mutS homolog 4                                                              |
| 1,14 | TSPAN19                        | tetraspanin 19                                                              |
| 1,14 | TRIM77                         | tripartite motif containing 77                                              |
| 1,14 | NRM                            | nurim (nuclear envelope membrane protein)                                   |
| 1,14 | HMBS                           | hydroxymethylbilane synthase                                                |
| 1,14 | C12orf10                       | chromosome 12 open reading frame 10                                         |
| 1,14 | OSTN                           | osteocrin                                                                   |
| 1,14 | FAM49A                         | family with sequence similarity 49, member A                                |
| 1,14 | CDHR1                          | cadherin-related family member 1                                            |
| 1,14 | PKP4                           | Transcript Identified by AceView, Entrez Gene ID(s) 8502                    |
| 1,14 | ZNF646                         | zinc finger protein 646                                                     |
| 1,14 | LOC101928694;<br>RP11-355N15.1 | uncharacterized LOC101928694; novel transcript, antisense to LIPC           |
| 1,14 | ACTN3                          | actinin, alpha 3 (gene/pseudogene)                                          |
| 1,14 | RP11-93O14.2;<br>VPS35         | novel transcript; Transcript Identified by AceView, Entrez Gene ID(s) 55737 |
| 1,14 | ZNF844                         | zinc finger protein 844                                                     |
| 1,14 | OR6V1                          | olfactory receptor, family 6, subfamily V, member 1                         |
| 1,14 | AREG                           | amphiregulin                                                                |
| 1,14 | IER3                           | immediate early response 3                                                  |
| 1,14 | USB1                           | U6 snRNA biogenesis 1                                                       |
| 1,14 | REXO1;<br>MIR1909              | REX1, RNA exonuclease 1 homolog; microRNA 1909                              |
| 1,14 | MTHFSD                         | methenyltetrahydrofolate synthetase domain containing                       |
| 1,14 | SPDYE3                         | speedy/RINGO cell cycle regulator family member E3                          |
| 1,14 | MLXIP                          | MLX interacting protein                                                     |
| 1,14 | HDLBP                          | Transcript Identified by AceView, Entrez Gene ID(s) 3069                    |
| 1,14 | LRRC8D                         | leucine rich repeat containing 8 family, member D                           |
| 1,14 | LY6G6C                         | lymphocyte antigen 6 complex, locus G6C                                     |
| 1,14 | MYBPC3                         | myosin binding protein C, cardiac                                           |
| 1,14 | PGLYRP3                        | peptidoglycan recognition protein 3                                         |
| 1,14 | SHD                            | Src homology 2 domain containing transforming protein D                     |
| 1,14 | PKD1L2                         | polycystic kidney disease 1-like 2 (gene/pseudogene)                        |
| 1,14 | ZSCAN18                        | zinc finger and SCAN domain containing 18                                   |
| 1,14 | FAXC                           | failed axon connections homolog                                             |
| 1,14 | HHAT                           | hedgehog acyltransferase                                                    |
| 1,14 | PHACTR3                        | phosphatase and actin regulator 3                                           |
| 1,14 | EFCAB7;<br>DLEU2L              | EF-hand calcium binding domain 7; deleted in lymphocytic leukemia 2-like    |
| 1,14 | CDK14                          | cyclin-dependent kinase 14                                                  |
| 1,14 | H2AFX                          | H2A histone family, member X                                                |
| 1,14 | ZNF563                         | zinc finger protein 563                                                     |
| 1,14 | OR51B5                         | olfactory receptor, family 51, subfamily B, member 5                        |
| 1,14 | PRR34                          | proline rich 34                                                             |
| 1,14 | KLF7                           | Kruppel-like factor 7 (ubiquitous)                                          |

|      |                    |                                                                                |
|------|--------------------|--------------------------------------------------------------------------------|
| 1,14 | GDF7               | growth differentiation factor 7                                                |
| 1,14 | ANKMY1             | ankyrin repeat and MYND domain containing 1                                    |
| 1,14 | C12orf50           | chromosome 12 open reading frame 50                                            |
| 1,14 | TGM4               | transglutaminase 4                                                             |
| 1,14 | PRKCG              | protein kinase C, gamma                                                        |
| 1,14 | PPP4R4             | protein phosphatase 4, regulatory subunit 4                                    |
| 1,14 | RBM41              | RNA binding motif protein 41                                                   |
| 1,14 | ZCWPW2             | zinc finger, CW type with PWWP domain 2                                        |
| 1,14 | IGLON5             | IgLON family member 5                                                          |
| 1,14 | IL36B              | interleukin 36, beta                                                           |
| 1,14 | SQLE               | squalene epoxidase                                                             |
| 1,14 | KRTAP11-1          | keratin associated protein 11-1                                                |
| 1,14 | OPN3               | opsin 3                                                                        |
| 1,14 | GRK4               | G protein-coupled receptor kinase 4                                            |
| 1,14 | OR51F2             | olfactory receptor, family 51, subfamily F, member 2                           |
| 1,14 | AMOTL1             | Memczak2013 ANTISENSE, coding, INTERNAL, UTR3 best transcript NM_130847        |
| 1,14 | NMT2               | N-myristoyltransferase 2                                                       |
| 1,14 | IL1RN              | interleukin 1 receptor antagonist                                              |
| 1,14 | CCDC88C            | coiled-coil domain containing 88C                                              |
| 1,14 | GIP                | gastric inhibitory polypeptide                                                 |
| 1,14 | CDH19              | cadherin 19, type 2                                                            |
| 1,14 | REG1A              | regenerating islet-derived 1 alpha                                             |
| 1,14 | ADAMTS17           | ADAM metalloproteinase with thrombospondin type 1 motif 17                     |
| 1,14 | SPZ1               | spermatogenic leucine zipper 1                                                 |
| 1,14 | TRPC7              | transient receptor potential cation channel, subfamily C, member 7             |
| 1,14 | PHLDA1             | pleckstrin homology-like domain, family A, member 1                            |
| 1,14 | LINC01225          | long intergenic non-protein coding RNA 1225                                    |
| 1,14 | CES1               | carboxylesterase 1                                                             |
| 1,14 | ZNF169             | zinc finger protein 169                                                        |
| 1,14 | BCL7A              | Memczak2013 ANTISENSE, coding, INTERNAL, intronic best transcript NM_001024808 |
| 1,14 | PLCL1              | phospholipase C-like 1                                                         |
| 1,14 | ZNF14              | zinc finger protein 14                                                         |
| 1,14 | RHOXF2;<br>RHOXF2B | Rhox homeobox family, member 2; Rhox homeobox family, member 2B                |
| 1,14 | WBP2               | WW domain binding protein 2                                                    |
| 1,14 | PTCD1              | pentatricopeptide repeat domain 1                                              |
| 1,14 | ZNF804B            | zinc finger protein 804B                                                       |
| 1,14 | COL7A1;<br>MIR711  | collagen, type VII, alpha 1; microRNA 711                                      |
| 1,14 | FMN1               | formin 1                                                                       |
| 1,14 | RNF135             | ring finger protein 135                                                        |
| 1,14 | CLEC17A            | C-type lectin domain family 17, member A                                       |
| 1,14 | MAPK11             | mitogen-activated protein kinase 11                                            |
| 1,14 | CRLF3              | cytokine receptor-like factor 3                                                |

|      |               |                                                                                           |
|------|---------------|-------------------------------------------------------------------------------------------|
| 1,14 | KLHL25        | Memczak2013 ALT_ACCEPTOR, ALT_DONOR, coding, INTERNAL, intronic best transcript NM_022480 |
| 1,14 | MTMR11        | myotubularin related protein 11                                                           |
| 1,14 | GAL3ST1       | galactose-3-O-sulfotransferase 1                                                          |
| 1,14 | SLC22A1       | solute carrier family 22 (organic cation transporter), member 1                           |
| 1,14 | TRIM29        | tripartite motif containing 29                                                            |
| 1,14 | RAMP1         | receptor (G protein-coupled) activity modifying protein 1                                 |
| 1,14 | URM1          | ubiquitin related modifier 1                                                              |
| 1,14 | ZNF232        | zinc finger protein 232                                                                   |
| 1,14 | ELK3          | ELK3, ETS-domain protein (SRF accessory protein 2)                                        |
| 1,14 | UBP1          | upstream binding protein 1 (LBP-1a)                                                       |
| 1,14 | HADHA         | Transcript Identified by AceView, Entrez Gene ID(s) 3030                                  |
| 1,14 | PLEKHS1       | pleckstrin homology domain containing, family S member 1                                  |
| 1,14 | KRTAP4-3      | keratin associated protein 4-3                                                            |
| 1,14 | OR2AT4        | olfactory receptor, family 2, subfamily AT, member 4                                      |
| 1,14 | MYRFL         | myelin regulatory factor-like                                                             |
| 1,14 | NRG1          | neuregulin 1                                                                              |
| 1,14 | IL2RA         | interleukin 2 receptor, alpha                                                             |
| 1,14 | FABP7         | fatty acid binding protein 7, brain                                                       |
| 1,14 | RUFY2         | RUN and FYVE domain containing 2                                                          |
| 1,14 | CT45A1        | cancer/testis antigen family 45, member A1                                                |
| 1,14 | CHUK          | conserved helix-loop-helix ubiquitous kinase                                              |
| 1,14 | ATL1          | atlastin GTPase 1                                                                         |
| 1,14 | DNAH1         | dynein, axonemal, heavy chain 1                                                           |
| 1,14 | OR7G3         | olfactory receptor, family 7, subfamily G, member 3                                       |
| 1,14 | MYT1          | myelin transcription factor 1                                                             |
| 1,14 | PRPF39        | pre-mRNA processing factor 39                                                             |
| 1,14 | OR8B12        | olfactory receptor, family 8, subfamily B, member 12                                      |
| 1,14 | ZNF30         | zinc finger protein 30                                                                    |
| 1,13 | ZCCHC13       | zinc finger, CCHC domain containing 13                                                    |
| 1,13 | IDO2          | indoleamine 2,3-dioxygenase 2                                                             |
| 1,13 | ELF4          | Memczak2013 ALT_DONOR, coding, INTERNAL, intronic best transcript NM_001421               |
| 1,13 | CCDC89        | coiled-coil domain containing 89                                                          |
| 1,13 | ATOX1         | antioxidant 1 copper chaperone                                                            |
| 1,13 | BFSP1         | beaded filament structural protein 1, filensin                                            |
| 1,13 | ACHE          | acetylcholinesterase (Yt blood group)                                                     |
| 1,13 | NODAL         | nodal growth differentiation factor                                                       |
| 1,13 | LIPF          | lipase, gastric                                                                           |
| 1,13 | TRPA1         | transient receptor potential cation channel, subfamily A, member 1                        |
| 1,13 | ZNF862        | zinc finger protein 862                                                                   |
| 1,13 | TMEM242       | transmembrane protein 242                                                                 |
| 1,13 | BBC3; MIR3191 | BCL2 binding component 3; microRNA 3191                                                   |

|      |                                       |                                                                                                                                                                          |
|------|---------------------------------------|--------------------------------------------------------------------------------------------------------------------------------------------------------------------------|
| 1,13 | SEMA6B                                | sema domain, transmembrane domain (TM), and cytoplasmic domain, (semaphorin) 6B                                                                                          |
| 1,13 | CABYR                                 | calcium binding tyrosine-(Y)-phosphorylation regulated                                                                                                                   |
| 1,13 | MTPAP                                 | mitochondrial poly(A) polymerase                                                                                                                                         |
| 1,13 | RWDD3;<br>TMEM56;<br>TMEM56-<br>RWDD3 | RWD domain containing 3; transmembrane protein 56; TMEM56-RWDD3 readthrough                                                                                              |
| 1,13 | SNIP1                                 | Smad nuclear interacting protein 1                                                                                                                                       |
| 1,13 | SLC34A1                               | solute carrier family 34 (type II sodium/phosphate cotransporter), member 1                                                                                              |
| 1,13 | CORO6                                 | coronin 6                                                                                                                                                                |
| 1,13 | F10                                   | coagulation factor X                                                                                                                                                     |
| 1,13 | OR4N4;<br>OR4N3P; OR4M2               | olfactory receptor, family 4, subfamily N, member 4; olfactory receptor, family 4, subfamily N, member 3 pseudogene; olfactory receptor, family 4, subfamily M, member 2 |
| 1,13 | CLEC1B                                | C-type lectin domain family 1, member B                                                                                                                                  |
| 1,13 | ZNF280B                               | zinc finger protein 280B                                                                                                                                                 |
| 1,13 | TRIM16                                | tripartite motif containing 16                                                                                                                                           |
| 1,13 | HMHA1                                 | histocompatibility (minor) HA-1                                                                                                                                          |
| 1,13 | NTRK1                                 | neurotrophic tyrosine kinase, receptor, type 1                                                                                                                           |
| 1,13 | RPA4                                  | replication protein A4                                                                                                                                                   |
| 1,13 | ZNF35                                 | zinc finger protein 35                                                                                                                                                   |
| 1,13 | TCP11X2                               | t-complex 11 family, X-linked 2                                                                                                                                          |
| 1,13 | GSN                                   | gelsolin                                                                                                                                                                 |
| 1,13 | TJAP1                                 | tight junction associated protein 1 (peripheral)                                                                                                                         |
| 1,13 | SLC19A1                               | solute carrier family 19 (folate transporter), member 1                                                                                                                  |
| 1,13 | DLX5                                  | distal-less homeobox 5                                                                                                                                                   |
| 1,13 | HERC5                                 | HECT and RLD domain containing E3 ubiquitin protein ligase 5                                                                                                             |
| 1,13 | OR6N2                                 | olfactory receptor, family 6, subfamily N, member 2                                                                                                                      |
| 1,13 | SLC43A3                               | solute carrier family 43, member 3                                                                                                                                       |
| 1,13 | HSD17B13                              | hydroxysteroid (17-beta) dehydrogenase 13                                                                                                                                |
| 1,13 | NUP188                                | Memczak2013 ANTISENSE, coding, INTERNAL, UTR3 best transcript NM_015354                                                                                                  |
| 1,13 | CD2BP2                                | CD2 (cytoplasmic tail) binding protein 2                                                                                                                                 |
| 1,13 | WHAMM                                 | WAS protein homolog associated with actin, golgi membranes and microtubules                                                                                              |
| 1,13 | DUOX1                                 | dual oxidase 1                                                                                                                                                           |
| 1,13 | IL2                                   | interleukin 2                                                                                                                                                            |
| 1,13 | RAD9A                                 | RAD9 checkpoint clamp component A                                                                                                                                        |
| 1,13 | FAM19A2                               | family with sequence similarity 19 (chemokine (C-C motif)-like), member A2                                                                                               |
| 1,13 | TMPRSS6                               | transmembrane protease, serine 6                                                                                                                                         |
| 1,13 | OBP2A                                 | odorant binding protein 2A                                                                                                                                               |
| 1,13 | TBC1D3                                | TBC1 domain family, member 3                                                                                                                                             |
| 1,13 | EXOC6                                 | exocyst complex component 6                                                                                                                                              |
| 1,13 | EIF1AY                                | eukaryotic translation initiation factor 1A, Y-linked                                                                                                                    |

|      |                       |                                                                                                                                  |
|------|-----------------------|----------------------------------------------------------------------------------------------------------------------------------|
| 1,13 | BMP7                  | bone morphogenetic protein 7                                                                                                     |
| 1,13 | MED9                  | mediator complex subunit 9                                                                                                       |
| 1,13 | RP11-380G5.2;<br>PTEN | Jeck2013 ALT_ACCEPTOR, ALT_DONOR, coding, INTERNAL, intronic best transcript NM_000314; novel transcript, sense intronic to PTEN |
| 1,13 | NKX3-1                | NK3 homeobox 1                                                                                                                   |
| 1,13 | MS4A8                 | membrane-spanning 4-domains, subfamily A, member 8                                                                               |
| 1,13 | L3MBTL4               | Memczak2013 ANTISENSE, coding, INTERNAL, intronic best transcript NM_173464                                                      |
| 1,13 | RNASE1                | ribonuclease, RNase A family, 1 (pancreatic)                                                                                     |
| 1,13 | OR4B1                 | olfactory receptor, family 4, subfamily B, member 1                                                                              |
| 1,13 | HMBS                  | hydroxymethylbilane synthase                                                                                                     |
| 1,13 | SHISA9                | shisa family member 9                                                                                                            |
| 1,13 | GABBR1                | gamma-aminobutyric acid (GABA) B receptor, 1                                                                                     |
| 1,13 | KIAA0753              | KIAA0753                                                                                                                         |
| 1,13 | BIRC3                 | baculoviral IAP repeat containing 3                                                                                              |
| 1,13 | GPM6A                 | glycoprotein M6A                                                                                                                 |
| 1,13 | GDF10                 | growth differentiation factor 10                                                                                                 |
| 1,13 | TMEM31                | transmembrane protein 31                                                                                                         |
| 1,13 | ARHGEF6               | Rac/Cdc42 guanine nucleotide exchange factor 6                                                                                   |
| 1,13 | LRRC4B                | leucine rich repeat containing 4B                                                                                                |
| 1,13 | SLC24A1               | solute carrier family 24 (sodium/potassium/calcium exchanger), member 1                                                          |
| 1,13 | NLRP10                | NLR family, pyrin domain containing 10                                                                                           |
| 1,13 | MCRS1                 | microspherule protein 1                                                                                                          |
| 1,13 | UTP4                  | UTP4 small subunit (SSU) processome component                                                                                    |
| 1,13 | VAT1L                 | vesicle amine transport 1-like                                                                                                   |
| 1,13 | NOXO1                 | NADPH oxidase organizer 1                                                                                                        |
| 1,13 | ABRA                  | actin binding Rho activating protein                                                                                             |
| 1,13 | SLC22A24              | solute carrier family 22, member 24                                                                                              |
| 1,13 | YIPF2                 | Yip1 domain family member 2                                                                                                      |
| 1,13 | METTL7B               | methyltransferase like 7B                                                                                                        |
| 1,13 | CCDC78                | coiled-coil domain containing 78                                                                                                 |
| 1,13 | SLC38A2               | solute carrier family 38, member 2                                                                                               |
| 1,13 | TANGO2                | transport and golgi organization 2 homolog                                                                                       |
| 1,13 | DSC1                  | desmocollin 1                                                                                                                    |
| 1,13 | OR4D11                | olfactory receptor, family 4, subfamily D, member 11                                                                             |
| 1,13 | OR5H15;<br>OR5H5P     | olfactory receptor, family 5, subfamily H, member 15; olfactory receptor, family 5, subfamily H, member 5 pseudogene             |
| 1,13 | BRINP2                | bone morphogenetic protein/retinoic acid inducible neural-specific 2                                                             |
| 1,13 | AMTN                  | amelotin                                                                                                                         |
| 1,13 | NRIP3                 | nuclear receptor interacting protein 3                                                                                           |
| 1,13 | NOV                   | nephroblastoma overexpressed                                                                                                     |
| 1,13 | C19orf54              | chromosome 19 open reading frame 54                                                                                              |
| 1,13 | TPRA1                 | transmembrane protein, adipocyte associated 1                                                                                    |
| 1,13 | P2RY10                | purinergic receptor P2Y, G-protein coupled, 10                                                                                   |
| 1,13 | MTBP                  | MDM2 binding protein                                                                                                             |

|      |                            |                                                                                                               |
|------|----------------------------|---------------------------------------------------------------------------------------------------------------|
| 1,13 | TRIM35                     | tripartite motif containing 35                                                                                |
| 1,13 | SLC1A1                     | solute carrier family 1 (neuronal/epithelial high affinity glutamate transporter, system Xag), member 1       |
| 1,13 | KLHL30                     | kelch-like family member 30                                                                                   |
| 1,13 | LOC388282;<br>CTD-260009.1 | uncharacterized LOC388282; novel transcript                                                                   |
| 1,13 | ZNRF1                      | zinc and ring finger 1, E3 ubiquitin protein ligase                                                           |
| 1,13 | DDC                        | dopa decarboxylase                                                                                            |
| 1,13 | RLN2                       | relaxin 2                                                                                                     |
| 1,13 | CLEC6A                     | C-type lectin domain family 6, member A                                                                       |
| 1,13 | NLRP10                     | NLR family, pyrin domain containing 10                                                                        |
| 1,13 | DKK2                       | dickkopf WNT signaling pathway inhibitor 2                                                                    |
| 1,13 | UCHL1                      | ubiquitin C-terminal hydrolase L1                                                                             |
| 1,13 | KRTAP19-3                  | keratin associated protein 19-3                                                                               |
| 1,13 | SLC41A3                    | solute carrier family 41, member 3                                                                            |
| 1,13 | SLC6A7                     | solute carrier family 6 (neurotransmitter transporter), member 7                                              |
| 1,13 | NAALAD2                    | N-acetylated alpha-linked acidic dipeptidase 2                                                                |
| 1,13 | UGCG                       | UDP-glucose ceramide glucosyltransferase                                                                      |
| 1,13 | FANCE                      | Fanconi anemia complementation group E                                                                        |
| 1,13 | DDN                        | dendrin                                                                                                       |
| 1,13 | RCHY1                      | ring finger and CHY zinc finger domain containing 1, E3 ubiquitin protein ligase                              |
| 1,13 | APOL1                      | apolipoprotein L1                                                                                             |
| 1,13 | NMS                        | neuromedin S                                                                                                  |
| 1,13 | PSEN2                      | presenilin 2                                                                                                  |
| 1,13 | FEZ1                       | fasciculation and elongation protein zeta 1                                                                   |
| 1,13 | MT1B; MT1CP                | metallothionein 1B; metallothionein 1C, pseudogene                                                            |
| 1,13 | MS4A13                     | membrane-spanning 4-domains, subfamily A, member 13                                                           |
| 1,13 | GHRH                       | growth hormone releasing hormone                                                                              |
| 1,13 | ARHGEF26                   | Rho guanine nucleotide exchange factor 26                                                                     |
| 1,13 | KLHL35                     | kelch-like family member 35                                                                                   |
| 1,13 | LRRTM4                     | leucine rich repeat transmembrane neuronal 4                                                                  |
| 1,13 | MED11                      | mediator complex subunit 11                                                                                   |
| 1,13 | QRFR                       | pyroglutamylated RFamide peptide receptor                                                                     |
| 1,13 | USP17L3;<br>USP17L8        | ubiquitin specific peptidase 17-like family member 3;<br>ubiquitin specific peptidase 17-like family member 8 |
| 1,13 | PROK2                      | prokineticin 2                                                                                                |
| 1,13 | TCF7L1                     | transcription factor 7-like 1 (T-cell specific, HMG-box)                                                      |
| 1,13 | MKRN3                      | makorin ring finger protein 3                                                                                 |
| 1,13 | LINC00174                  | long intergenic non-protein coding RNA 174                                                                    |
| 1,13 | DNAJA4                     | DnaJ (Hsp40) homolog, subfamily A, member 4                                                                   |
| 1,13 | CLIC5                      | chloride intracellular channel 5                                                                              |
| 1,13 | CAV2                       | caveolin 2                                                                                                    |
| 1,13 | FCRL6                      | Fc receptor-like 6                                                                                            |
| 1,13 | DDX25                      | DEAD (Asp-Glu-Ala-Asp) box helicase 25                                                                        |
| 1,13 | APLF                       | aprataxin and PNKP like factor                                                                                |
| 1,13 | CHRNA4                     | cholinergic receptor, nicotinic alpha 4                                                                       |

|      |                                      |                                                                                                                                                                                                               |
|------|--------------------------------------|---------------------------------------------------------------------------------------------------------------------------------------------------------------------------------------------------------------|
| 1,13 | CDKL4                                | cyclin-dependent kinase-like 4                                                                                                                                                                                |
| 1,13 | ELF1                                 | Transcript Identified by AceView, Entrez Gene ID(s) 1997; 100128628                                                                                                                                           |
| 1,13 | KIRREL3                              | kin of IRRE like 3 (Drosophila)                                                                                                                                                                               |
| 1,13 | SLC45A4                              | solute carrier family 45, member 4                                                                                                                                                                            |
| 1,13 | MAP1LC3C                             | microtubule associated protein 1 light chain 3 gamma                                                                                                                                                          |
| 1,13 | PSG2                                 | pregnancy specific beta-1-glycoprotein 2                                                                                                                                                                      |
| 1,13 | HIST2H3D                             | histone cluster 2, H3d                                                                                                                                                                                        |
| 1,13 | KPNA3                                | karyopherin alpha 3 (importin alpha 4)                                                                                                                                                                        |
| 1,13 | KRT39                                | keratin 39, type I                                                                                                                                                                                            |
| 1,13 | FBXL6                                | F-box and leucine-rich repeat protein 6                                                                                                                                                                       |
| 1,13 | USP40                                | ubiquitin specific peptidase 40                                                                                                                                                                               |
| 1,13 | SPATA1                               | spermatogenesis associated 1                                                                                                                                                                                  |
| 1,13 | SHROOM4                              | shroom family member 4                                                                                                                                                                                        |
| 1,13 | MESDC1                               | mesoderm development candidate 1                                                                                                                                                                              |
| 1,13 | LOC401052;<br>AC022007.5;<br>TMEM111 | uncharacterized LOC401052; Salzman2013 ANNOTATED, coding, INTERNAL, OVERLAPTX, OVEXON, UTR5 best transcript NM_001008737; novel transcript; Transcript Identified by AceView, Entrez Gene ID(s) 401052; 55831 |
| 1,13 | ATP6V0E2                             | ATPase, H <sup>+</sup> transporting V0 subunit e2                                                                                                                                                             |
| 1,13 | N6AMT1                               | N-6 adenine-specific DNA methyltransferase 1 (putative)                                                                                                                                                       |
| 1,13 | CTNNBIP1                             | catenin, beta interacting protein 1                                                                                                                                                                           |
| 1,13 | FKBP3                                | FK506 binding protein 3                                                                                                                                                                                       |
| 1,13 | RASL11A                              | RAS-like, family 11, member A                                                                                                                                                                                 |
| 1,13 | MSTO1;<br>MSTO2P                     | misato 1, mitochondrial distribution and morphology regulator; misato family member 2, pseudogene                                                                                                             |
| 1,13 | SNX2                                 | sorting nexin 2                                                                                                                                                                                               |
| 1,13 | COPRS                                | coordinator of PRMT5, differentiation stimulator                                                                                                                                                              |
| 1,13 | C1orf106                             | chromosome 1 open reading frame 106                                                                                                                                                                           |
| 1,13 | SLC36A1                              | solute carrier family 36 (proton/amino acid symporter), member 1                                                                                                                                              |
| 1,13 | KCNH4                                | potassium channel, voltage gated eag related subfamily H, member 4                                                                                                                                            |
| 1,13 | ATXN3L                               | ataxin 3-like                                                                                                                                                                                                 |
| 1,13 | LDHD                                 | lactate dehydrogenase D                                                                                                                                                                                       |
| 1,13 | TAS2R10                              | taste receptor, type 2, member 10                                                                                                                                                                             |
| 1,13 | EPHA4                                | EPH receptor A4                                                                                                                                                                                               |
| 1,13 | EMC9                                 | ER membrane protein complex subunit 9                                                                                                                                                                         |
| 1,13 | UMODL1                               | uromodulin-like 1                                                                                                                                                                                             |
| 1,13 | LOC388882;<br>AP000345.1             | uncharacterized LOC388882; novel transcript                                                                                                                                                                   |
| 1,13 | ANXA13                               | annexin A13                                                                                                                                                                                                   |
| 1,13 | PCBP3                                | poly(rC) binding protein 3                                                                                                                                                                                    |
| 1,13 | KIAA1456                             | KIAA1456                                                                                                                                                                                                      |
| 1,13 | SCAF11                               | Memczak2013 ANTISENSE, CDS, coding, INTERNAL best transcript NM_004719                                                                                                                                        |

|      |                                 |                                                                                                                                                                                                                                                                          |
|------|---------------------------------|--------------------------------------------------------------------------------------------------------------------------------------------------------------------------------------------------------------------------------------------------------------------------|
| 1,13 | BAGE5                           | Synthetic construct Homo sapiens clone IMAGE:100062553, MGC:190557 B melanoma antigen family, member 5 (BAGE5) mRNA, encodes complete protein.; B melanoma antigen family, member 5 [Source:EntrezGene;Acc:85316]                                                        |
| 1,13 | SAMD3                           | sterile alpha motif domain containing 3                                                                                                                                                                                                                                  |
| 1,13 | DMAP1                           | DNA methyltransferase 1 associated protein 1                                                                                                                                                                                                                             |
| 1,13 | CFAP43                          | cilia and flagella associated protein 43                                                                                                                                                                                                                                 |
| 1,13 | CS                              | citrate synthase                                                                                                                                                                                                                                                         |
| 1,13 | TSSK1B                          | testis-specific serine kinase 1B                                                                                                                                                                                                                                         |
| 1,13 | STEAP1                          | six transmembrane epithelial antigen of the prostate 1                                                                                                                                                                                                                   |
| 1,13 | MED21                           | mediator complex subunit 21                                                                                                                                                                                                                                              |
| 1,13 | ABHD18                          | abhydrolase domain containing 18                                                                                                                                                                                                                                         |
| 1,13 | AQP9                            | aquaporin 9                                                                                                                                                                                                                                                              |
| 1,13 | RUNDC3A                         | RUN domain containing 3A                                                                                                                                                                                                                                                 |
| 1,13 | GNG13                           | guanine nucleotide binding protein (G protein), gamma 13                                                                                                                                                                                                                 |
| 1,13 | PPIL2                           | peptidylprolyl isomerase (cyclophilin)-like 2                                                                                                                                                                                                                            |
| 1,13 | ZNF785                          | zinc finger protein 785                                                                                                                                                                                                                                                  |
| 1,13 | IFT57                           | intraflagellar transport 57                                                                                                                                                                                                                                              |
| 1,13 | DAAM2                           | dishevelled associated activator of morphogenesis 2                                                                                                                                                                                                                      |
| 1,13 | IL12B                           | interleukin 12B                                                                                                                                                                                                                                                          |
| 1,13 | COL16A1                         | collagen, type XVI, alpha 1                                                                                                                                                                                                                                              |
| 1,13 | DEFB121                         | defensin, beta 121                                                                                                                                                                                                                                                       |
| 1,13 | DNAAF1                          | dynein, axonemal, assembly factor 1                                                                                                                                                                                                                                      |
| 1,13 | SLC35F3                         | solute carrier family 35, member F3                                                                                                                                                                                                                                      |
| 1,13 | NSUN6                           | NOP2/Sun domain family, member 6                                                                                                                                                                                                                                         |
| 1,13 | C6orf25                         | chromosome 6 open reading frame 25                                                                                                                                                                                                                                       |
| 1,13 | OR9G1; OR9G9                    | olfactory receptor, family 9, subfamily G, member 1; olfactory receptor, family 9, subfamily G, member 9                                                                                                                                                                 |
| 1,13 | TBC1D10C                        | TBC1 domain family, member 10C                                                                                                                                                                                                                                           |
| 1,13 | RNF138                          | ring finger protein 138, E3 ubiquitin protein ligase                                                                                                                                                                                                                     |
| 1,13 | IL17REL                         | interleukin 17 receptor E-like                                                                                                                                                                                                                                           |
| 1,13 | HSPB8                           | heat shock 22kDa protein 8                                                                                                                                                                                                                                               |
| 1,13 | HYOU1                           | hypoxia up-regulated 1                                                                                                                                                                                                                                                   |
| 1,13 | BEST2                           | bestrophin 2                                                                                                                                                                                                                                                             |
| 1,13 | LOC100288966; POTED; BX072566.1 | POTE ankyrin domain family member D-like; Synthetic construct Homo sapiens clone IMAGE:100066427, MGC:195564 POTE ankyrin domain family, member D (POTED) mRNA, encodes complete protein.; uncharacterized protein LOC100288966 [Source:RefSeq peptide;Acc:NP_001244291] |
| 1,13 | FAM114A2                        | family with sequence similarity 114, member A2                                                                                                                                                                                                                           |
| 1,13 | ALX1                            | ALX homeobox 1                                                                                                                                                                                                                                                           |
| 1,13 | SPANXN3                         | SPANX family, member N3                                                                                                                                                                                                                                                  |
| 1,13 | PPP1CA                          | protein phosphatase 1, catalytic subunit, alpha isozyme                                                                                                                                                                                                                  |
| 1,13 | ALPPL2                          | alkaline phosphatase, placental like 2                                                                                                                                                                                                                                   |
| 1,13 | PLK2                            | polo-like kinase 2                                                                                                                                                                                                                                                       |

|      |                                                                          |                                                                                                                                                                                                                                                                                                                                                        |
|------|--------------------------------------------------------------------------|--------------------------------------------------------------------------------------------------------------------------------------------------------------------------------------------------------------------------------------------------------------------------------------------------------------------------------------------------------|
| 1,13 | SPI1                                                                     | Spi-1 proto-oncogene                                                                                                                                                                                                                                                                                                                                   |
| 1,13 | HHIPL2                                                                   | HHIP-like 2                                                                                                                                                                                                                                                                                                                                            |
| 1,13 | CARF                                                                     | calcium responsive transcription factor                                                                                                                                                                                                                                                                                                                |
| 1,13 | NUGGC                                                                    | nuclear GTPase, germinal center associated                                                                                                                                                                                                                                                                                                             |
| 1,13 | HLA-DQB2                                                                 | major histocompatibility complex, class II, DQ beta 2                                                                                                                                                                                                                                                                                                  |
| 1,13 | TEX10                                                                    | testis expressed 10                                                                                                                                                                                                                                                                                                                                    |
| 1,13 | TVP23A                                                                   | trans-golgi network vesicle protein 23 homolog A (S. cerevisiae)                                                                                                                                                                                                                                                                                       |
| 1,13 | MXD1                                                                     | MAX dimerization protein 1                                                                                                                                                                                                                                                                                                                             |
| 1,13 | ZNF763                                                                   | zinc finger protein 763                                                                                                                                                                                                                                                                                                                                |
| 1,13 | NANOS3                                                                   | nanos homolog 3 (Drosophila)                                                                                                                                                                                                                                                                                                                           |
| 1,13 | ADCY2                                                                    | Transcript Identified by AceView, Entrez Gene ID(s) 108                                                                                                                                                                                                                                                                                                |
| 1,13 | HARS2                                                                    | histidyl-tRNA synthetase 2, mitochondrial                                                                                                                                                                                                                                                                                                              |
| 1,13 | LRRC14B                                                                  | leucine rich repeat containing 14B                                                                                                                                                                                                                                                                                                                     |
| 1,13 | CRKL                                                                     | Memczak2013 ANTISENSE, CDS, coding, INTERNAL best transcript NM_005207                                                                                                                                                                                                                                                                                 |
| 1,13 | SPATS2L                                                                  | spermatogenesis associated, serine-rich 2-like                                                                                                                                                                                                                                                                                                         |
| 1,13 | COL1A1                                                                   | Jeck2013 ANTISENSE, coding, INTERNAL, intronic best transcript NM_000088                                                                                                                                                                                                                                                                               |
| 1,13 | WDR72                                                                    | WD repeat domain 72                                                                                                                                                                                                                                                                                                                                    |
| 1,13 | CD1B                                                                     | CD1b molecule                                                                                                                                                                                                                                                                                                                                          |
| 1,13 | LGALS14                                                                  | lectin, galactoside-binding, soluble, 14                                                                                                                                                                                                                                                                                                               |
| 1,13 | SH3GLB2                                                                  | SH3-domain GRB2-like endophilin B2                                                                                                                                                                                                                                                                                                                     |
| 1,13 | TMEM74B                                                                  | transmembrane protein 74B                                                                                                                                                                                                                                                                                                                              |
| 1,13 | ARHGDIB                                                                  | Rho GDP dissociation inhibitor (GDI) beta                                                                                                                                                                                                                                                                                                              |
| 1,13 | AGAP9; BMS1P6                                                            | ArfGAP with GTPase domain, ankyrin repeat and PH domain 9; BMS1 ribosome biogenesis factor pseudogene 6                                                                                                                                                                                                                                                |
| 1,13 | RASGRF2                                                                  | Ras protein-specific guanine nucleotide-releasing factor 2                                                                                                                                                                                                                                                                                             |
| 1,13 | TIMP3                                                                    | TIMP metalloproteinase inhibitor 3                                                                                                                                                                                                                                                                                                                     |
| 1,13 | FAM171A2                                                                 | family with sequence similarity 171, member A2                                                                                                                                                                                                                                                                                                         |
| 1,13 | USP17L24;<br>USP17L26;<br>USP17L5;<br>USP17L27;<br>USP17L29;<br>USP17L30 | ubiquitin specific peptidase 17-like family member 24;<br>ubiquitin specific peptidase 17-like family member 26;<br>ubiquitin specific peptidase 17-like family member 5;<br>ubiquitin specific peptidase 17-like family member 27;<br>ubiquitin specific peptidase 17-like family member 29;<br>ubiquitin specific peptidase 17-like family member 30 |
| 1,13 | USP17L25;<br>USP17L27                                                    | ubiquitin specific peptidase 17-like family member 25;<br>ubiquitin specific peptidase 17-like family member 27                                                                                                                                                                                                                                        |
| 1,13 | MYH11                                                                    | myosin, heavy chain 11, smooth muscle                                                                                                                                                                                                                                                                                                                  |
| 1,13 | PIP5K1A                                                                  | phosphatidylinositol-4-phosphate 5-kinase, type I, alpha                                                                                                                                                                                                                                                                                               |
| 1,13 | CSGALNACT1                                                               | chondroitin sulfate N-acetylgalactosaminyltransferase 1                                                                                                                                                                                                                                                                                                |
| 1,13 | ETV1                                                                     | ets variant 1                                                                                                                                                                                                                                                                                                                                          |
| 1,13 | C1D                                                                      | C1D nuclear receptor corepressor                                                                                                                                                                                                                                                                                                                       |
| 1,13 | FGFR1OP                                                                  | FGFR1 oncogene partner                                                                                                                                                                                                                                                                                                                                 |

|      |                                        |                                                                                                                                                                                                                                   |
|------|----------------------------------------|-----------------------------------------------------------------------------------------------------------------------------------------------------------------------------------------------------------------------------------|
| 1,13 | PLCD4                                  | phospholipase C, delta 4                                                                                                                                                                                                          |
| 1,13 | TBCD                                   | Transcript Identified by AceView, Entrez Gene ID(s)<br>6904                                                                                                                                                                       |
| 1,13 | ATG12                                  | autophagy related 12                                                                                                                                                                                                              |
| 1,13 | STAC                                   | SH3 and cysteine rich domain                                                                                                                                                                                                      |
| 1,13 | KLHL25                                 | kelch-like family member 25                                                                                                                                                                                                       |
| 1,13 | ZCCHC7                                 | zinc finger, CCHC domain containing 7                                                                                                                                                                                             |
| 1,13 | ATG16L1                                | autophagy related 16-like 1                                                                                                                                                                                                       |
| 1,13 | ARMC12                                 | armadillo repeat containing 12                                                                                                                                                                                                    |
| 1,13 | RP11-569G13.3;<br>LOC158434;<br>setora | uncharacterized protein LOC158434 [Source:RefSeq<br>peptide;Acc:NP_001243337]; uncharacterized<br>LOC158434; Protein LOC158434<br>[Source:UniProtKB/TrEMBL;Acc:A0A087X204];<br>novel transcript; Transcript Identified by AceView |
| 1,13 | SULT4A1                                | sulfotransferase family 4A member 1                                                                                                                                                                                               |
| 1,13 | FLJ33360; CTD-<br>2324F15.2            | FLJ33360 protein; FLJ33360 protein<br>[Source:EntrezGene;Acc:401172]; putative novel<br>transcript                                                                                                                                |
| 1,13 | C14orf28                               | chromosome 14 open reading frame 28                                                                                                                                                                                               |
| 1,13 | ZNFX1                                  | zinc finger, NFX1-type containing 1                                                                                                                                                                                               |
| 1,13 | sep-03                                 | sepin 3                                                                                                                                                                                                                           |
| 1,13 | TGFB1I1                                | transforming growth factor beta 1 induced transcript 1                                                                                                                                                                            |
| 1,13 | HPS3                                   | Hermansky-Pudlak syndrome 3                                                                                                                                                                                                       |
| 1,13 | C6orf1                                 | chromosome 6 open reading frame 1                                                                                                                                                                                                 |
| 1,13 | ZNF43                                  | zinc finger protein 43                                                                                                                                                                                                            |
| 1,13 | CYP4B1                                 | cytochrome P450, family 4, subfamily B, polypeptide 1                                                                                                                                                                             |
| 1,13 | IFNA10                                 | interferon, alpha 10                                                                                                                                                                                                              |
| 1,13 | SSX4B; SSX4                            | synovial sarcoma, X breakpoint 4B; synovial sarcoma,<br>X breakpoint 4                                                                                                                                                            |
| 1,13 | DTNA                                   | Transcript Identified by AceView, Entrez Gene ID(s)<br>1837                                                                                                                                                                       |
| 1,13 | ITIH6                                  | inter-alpha-trypsin inhibitor heavy chain family,<br>member 6                                                                                                                                                                     |
| 1,13 | ART3                                   | ADP-ribosyltransferase 3                                                                                                                                                                                                          |
| 1,13 | CCL4L2; CCL4;<br>CCL4L1                | chemokine (C-C motif) ligand 4-like 2; chemokine (C-<br>C motif) ligand 4; chemokine (C-C motif) ligand 4-like<br>1                                                                                                               |
| 1,13 | C15orf52                               | chromosome 15 open reading frame 52                                                                                                                                                                                               |
| 1,13 | TGFB1                                  | transforming growth factor beta 1                                                                                                                                                                                                 |
| 1,13 | BTNL3                                  | butyrophilin-like 3                                                                                                                                                                                                               |
| 1,13 | CARD16                                 | caspase recruitment domain family, member 16                                                                                                                                                                                      |
| 1,13 | TCERG1                                 | Transcript Identified by AceView, Entrez Gene ID(s)<br>10915                                                                                                                                                                      |
| 1,13 | CLEC4C                                 | C-type lectin domain family 4, member C                                                                                                                                                                                           |
| 1,13 | OR51A4                                 | olfactory receptor, family 51, subfamily A, member 4                                                                                                                                                                              |
| 1,13 | CDHR4                                  | cadherin-related family member 4                                                                                                                                                                                                  |
| 1,13 | OR7D2                                  | olfactory receptor, family 7, subfamily D, member 2                                                                                                                                                                               |
| 1,13 | CCDC175                                | coiled-coil domain containing 175                                                                                                                                                                                                 |
| 1,13 | TINAGL1                                | tubulointerstitial nephritis antigen-like 1                                                                                                                                                                                       |
| 1,13 | ZNF35                                  | zinc finger protein 35                                                                                                                                                                                                            |

|      |                 |                                                                       |
|------|-----------------|-----------------------------------------------------------------------|
| 1,13 | BOC             | BOC cell adhesion associated, oncogene regulated                      |
| 1,13 | PRRX1           | paired related homeobox 1                                             |
| 1,13 | KRT13           | keratin 13, type I                                                    |
| 1,13 | TMEM266         | transmembrane protein 266                                             |
| 1,13 | KCTD21-AS1      | KCTD21 antisense RNA 1                                                |
| 1,13 | NEU2            | sialidase 2 (cytosolic sialidase)                                     |
| 1,13 | RORB            | RAR-related orphan receptor B                                         |
| 1,13 | RBM14           | RNA binding motif protein 14                                          |
| 1,13 | CAPNS2          | calpain, small subunit 2                                              |
| 1,13 | C8orf82; LRRC24 | chromosome 8 open reading frame 82; leucine rich repeat containing 24 |
| 1,13 | SMIM3           | small integral membrane protein 3                                     |
| 1,13 | BMX             | BMX non-receptor tyrosine kinase                                      |
| 1,13 | OVGPI           | oviductal glycoprotein 1                                              |
| 1,13 | OR7D4           | olfactory receptor, family 7, subfamily D, member 4                   |
| 1,13 | LY6E            | lymphocyte antigen 6 complex, locus E                                 |
| 1,13 | FMNL3           | formin like 3                                                         |
| 1,13 | GK2             | glycerol kinase 2                                                     |
| 1,13 | LINC00222       | long intergenic non-protein coding RNA 222                            |
| 1,13 | LEF1            | lymphoid enhancer-binding factor 1                                    |
| 1,13 | UGT2B11         | UDP glucuronosyltransferase 2 family, polypeptide B11                 |
| 1,13 | FAM181B         | family with sequence similarity 181, member B                         |
| 1,13 | NRSN1           | neurensin 1                                                           |
| 1,13 | TMEM27          | transmembrane protein 27                                              |
| 1,13 | STARD13         | StAR-related lipid transfer domain containing 13                      |
| 1,13 | HCG9            | HLA complex group 9 (non-protein coding)                              |
| 1,13 | ADGB            | androglobin                                                           |
| 1,12 | RHBG            | Rh family, B glycoprotein (gene/pseudogene)                           |
| 1,12 | MED17           | mediator complex subunit 17                                           |
| 1,12 | OR4F17          | olfactory receptor, family 4, subfamily F, member 17                  |
| 1,12 | TUBB2B          | tubulin, beta 2B class IIb                                            |
| 1,12 | LINC00116       | long intergenic non-protein coding RNA 116                            |
| 1,12 | GRPEL1          | GrpE-like 1, mitochondrial (E. coli)                                  |
| 1,12 | B4GALNT3        | beta-1,4-N-acetyl-galactosaminyl transferase 3                        |
| 1,12 | ZKSCAN7         | zinc finger with KRAB and SCAN domains 7                              |
| 1,12 | ZNF681          | zinc finger protein 681                                               |
| 1,12 | CLK4            | CDC like kinase 4                                                     |
| 1,12 | DZIP1           | DAZ interacting zinc finger protein 1                                 |
| 1,12 | CLEC4A          | C-type lectin domain family 4, member A                               |
| 1,12 | ADCK1           | aarF domain containing kinase 1                                       |
| 1,12 | MDK             | midkine (neurite growth-promoting factor 2)                           |
| 1,12 | PLAT            | plasminogen activator, tissue                                         |
| 1,12 | MTCH2           | mitochondrial carrier 2                                               |
| 1,12 | FMO2            | flavin containing monooxygenase 2                                     |
| 1,12 | MYADM           | myeloid-associated differentiation marker                             |
| 1,12 | HAUS5           | HAUS augmin like complex subunit 5                                    |
| 1,12 | NKX2-1          | NK2 homeobox 1                                                        |
| 1,12 | KLHL7           | kelch-like family member 7                                            |
| 1,12 | HOXA3           | homeobox A3                                                           |

|      |                |                                                                               |
|------|----------------|-------------------------------------------------------------------------------|
| 1,12 | SVOP           | SV2 related protein                                                           |
| 1,12 | LMAN1L         | lectin, mannose-binding, 1 like                                               |
| 1,12 | ZNF708         | zinc finger protein 708                                                       |
| 1,12 | APOBEC4        | apolipoprotein B mRNA editing enzyme, catalytic polypeptide-like 4 (putative) |
| 1,12 | HTN3           | histatin 3                                                                    |
| 1,12 | TMEM145        | transmembrane protein 145                                                     |
| 1,12 | CCDC181        | coiled-coil domain containing 181                                             |
| 1,12 | RAPSN          | receptor-associated protein of the synapse                                    |
| 1,12 | NME8           | NME/NM23 family member 8                                                      |
| 1,12 | MT1X           | metallothionein 1X                                                            |
| 1,12 | LOC643802      | u3 small nucleolar ribonucleoprotein protein MPP10-like                       |
| 1,12 | PAX9           | paired box 9                                                                  |
| 1,12 | FAM205A        | family with sequence similarity 205, member A                                 |
| 1,12 | NCEH1          | neutral cholesterol ester hydrolase 1                                         |
| 1,12 | ERV3-1; ZNF117 | endogenous retrovirus group 3, member 1; zinc finger protein 117              |
| 1,12 | LHB            | luteinizing hormone beta polypeptide                                          |
| 1,12 | OR2G6          | olfactory receptor, family 2, subfamily G, member 6                           |
| 1,12 | CCNE1          | cyclin E1                                                                     |
| 1,12 | DUX4L6         | double homeobox 4 like 6                                                      |
| 1,12 | DUX4L5         | double homeobox 4 like 5                                                      |
| 1,12 | DUX4L1         | double homeobox 4 like 1                                                      |
| 1,12 | DUX4L3         | double homeobox 4 like 3                                                      |
| 1,12 | DUX4L2         | double homeobox 4 like 2                                                      |
| 1,12 | DHODH          | dihydroorotate dehydrogenase (quinone)                                        |
| 1,12 | HSPA6          | heat shock 70kDa protein 6 (HSP70B)                                           |
| 1,12 | CCDC36         | coiled-coil domain containing 36                                              |
| 1,12 | RBM24          | RNA binding motif protein 24                                                  |
| 1,12 | C12orf77       | chromosome 12 open reading frame 77                                           |
| 1,12 | OTOA           | otoancorin                                                                    |
| 1,12 | HYOU1          | hypoxia up-regulated 1                                                        |
| 1,12 | PRR3           | proline rich 3                                                                |
| 1,12 | TCP11          | t-complex 11, testis-specific                                                 |
| 1,12 | UBLCP1         | ubiquitin-like domain containing CTD phosphatase 1                            |
| 1,12 | UCK1           | uridine-cytidine kinase 1                                                     |
| 1,12 | SLC5A11        | solute carrier family 5 (sodium/inositol cotransporter), member 11            |
| 1,12 | P2RX7          | purinergic receptor P2X, ligand gated ion channel, 7                          |
| 1,12 | DOK3           | docking protein 3                                                             |
| 1,12 | LINC01235      | long intergenic non-protein coding RNA 1235                                   |
| 1,12 | LEPR; LEPROT   | leptin receptor; leptin receptor overlapping transcript                       |
| 1,12 | ZNF442         | zinc finger protein 442                                                       |
| 1,12 | MYL4           | myosin light chain 4                                                          |
| 1,12 | TXNRD2         | Transcript Identified by AceView, Entrez Gene ID(s) 10587                     |
| 1,12 | WDR47          | WD repeat domain 47                                                           |
| 1,12 | ZIC3           | Zic family member 3                                                           |
| 1,12 | LINC01537      | long intergenic non-protein coding RNA 1537                                   |

|      |                                                  |                                                                                                                                                                                                                                           |
|------|--------------------------------------------------|-------------------------------------------------------------------------------------------------------------------------------------------------------------------------------------------------------------------------------------------|
| 1,12 | LIX1                                             | Memczak2013 ANTISENSE, coding, INTERNAL, intronic best transcript NM_153234                                                                                                                                                               |
| 1,12 | PRR4                                             | proline rich 4 (lacrimal)                                                                                                                                                                                                                 |
| 1,12 | TRGJ1; TRGC2; TRGJ2; TRGV9; TRGC1; TRGJP; TRGJP2 | T cell receptor gamma joining 1; T cell receptor gamma constant 2; T cell receptor gamma joining 2; T cell receptor gamma variable 9; T cell receptor gamma constant 1; T cell receptor gamma joining P; T cell receptor gamma joining P2 |
| 1,12 | DGUOK                                            | deoxyguanosine kinase                                                                                                                                                                                                                     |
| 1,12 | GKAP1                                            | G kinase anchoring protein 1                                                                                                                                                                                                              |
| 1,12 | PTCH1                                            | patched 1                                                                                                                                                                                                                                 |
| 1,12 | DAOA                                             | D-amino acid oxidase activator                                                                                                                                                                                                            |
| 1,12 | NARFL                                            | nuclear prelamin A recognition factor-like                                                                                                                                                                                                |
| 1,12 | VPS37D                                           | vacuolar protein sorting 37 homolog D (S. cerevisiae)                                                                                                                                                                                     |
| 1,12 | SERTAD4                                          | SERTA domain containing 4                                                                                                                                                                                                                 |
| 1,12 | ALKBH1                                           | alkB homolog 1, histone H2A dioxygenase                                                                                                                                                                                                   |
| 1,12 | SH3BGRL3                                         | SH3 domain binding glutamate-rich protein like 3                                                                                                                                                                                          |
| 1,12 | MXRA5                                            | matrix-remodelling associated 5                                                                                                                                                                                                           |
| 1,12 | MTRNR2L9                                         | MT-RNR2-like 9                                                                                                                                                                                                                            |
| 1,12 | NOP10                                            | NOP10 ribonucleoprotein                                                                                                                                                                                                                   |
| 1,12 | PIH1D3                                           | PIH1 domain containing 3                                                                                                                                                                                                                  |
| 1,12 | C1orf87                                          | chromosome 1 open reading frame 87                                                                                                                                                                                                        |
| 1,12 | KRTAP6-1                                         | keratin associated protein 6-1                                                                                                                                                                                                            |
| 1,12 | RFX6                                             | regulatory factor X, 6                                                                                                                                                                                                                    |
| 1,12 | SOGA1                                            | suppressor of glucose, autophagy associated 1                                                                                                                                                                                             |
| 1,12 | PRMT7                                            | protein arginine methyltransferase 7                                                                                                                                                                                                      |
| 1,12 | CCDC74B                                          | coiled-coil domain containing 74B                                                                                                                                                                                                         |
| 1,12 | SEPP1                                            | selenoprotein P, plasma, 1                                                                                                                                                                                                                |
| 1,12 | FRMPD4                                           | FERM and PDZ domain containing 4                                                                                                                                                                                                          |
| 1,12 | FGF6                                             | fibroblast growth factor 6                                                                                                                                                                                                                |
| 1,12 | DMC1                                             | DNA meiotic recombinase 1                                                                                                                                                                                                                 |
| 1,12 | AKAP14                                           | A kinase (PRKA) anchor protein 14                                                                                                                                                                                                         |
| 1,12 | HHIPL1                                           | HHIP-like 1                                                                                                                                                                                                                               |
| 1,12 | NCDN                                             | neurochondrin                                                                                                                                                                                                                             |
| 1,12 | CALML3                                           | calmodulin-like 3                                                                                                                                                                                                                         |
| 1,12 | PTX3                                             | pentraxin 3, long                                                                                                                                                                                                                         |
| 1,12 | GJB5                                             | gap junction protein beta 5                                                                                                                                                                                                               |
| 1,12 | KLHL38                                           | kelch-like family member 38                                                                                                                                                                                                               |
| 1,12 | FOXF2                                            | forkhead box F2                                                                                                                                                                                                                           |
| 1,12 | SMIM9                                            | small integral membrane protein 9                                                                                                                                                                                                         |
| 1,12 | ZNF496                                           | zinc finger protein 496                                                                                                                                                                                                                   |
| 1,12 | DTX1                                             | deltex 1, E3 ubiquitin ligase                                                                                                                                                                                                             |
| 1,12 | WNT6                                             | wingless-type MMTV integration site family, member 6                                                                                                                                                                                      |
| 1,12 | PDE2A                                            | phosphodiesterase 2A, cGMP-stimulated                                                                                                                                                                                                     |
| 1,12 | PGM5                                             | phosphoglucomutase 5                                                                                                                                                                                                                      |
| 1,12 | FOXA1                                            | forkhead box A1                                                                                                                                                                                                                           |
| 1,12 | GSDMC                                            | gasdermin C                                                                                                                                                                                                                               |
| 1,12 | MT1L                                             | metallothionein 1L (gene/pseudogene)                                                                                                                                                                                                      |
| 1,12 | RAB37                                            | RAB37, member RAS oncogene family                                                                                                                                                                                                         |

|      |                          |                                                                                     |
|------|--------------------------|-------------------------------------------------------------------------------------|
| 1,12 | HELQ                     | helicase, POLQ-like                                                                 |
| 1,12 | PSD4                     | pleckstrin and Sec7 domain containing 4                                             |
| 1,12 | FABP4                    | fatty acid binding protein 4, adipocyte                                             |
| 1,12 | SLC25A29                 | solute carrier family 25 (mitochondrial carnitine/acylcarnitine carrier), member 29 |
| 1,12 | FAM124B                  | family with sequence similarity 124 member B                                        |
| 1,12 | GDA                      | guanine deaminase                                                                   |
| 1,12 | C1orf234                 | chromosome 1 open reading frame 234                                                 |
| 1,12 | GAR1                     | GAR1 homolog, ribonucleoprotein                                                     |
| 1,12 | YBX2                     | Y box binding protein 2                                                             |
| 1,12 | STIL                     | SCL/TAL1 interrupting locus                                                         |
| 1,12 | ZNF812P                  | zinc finger protein 812, pseudogene                                                 |
| 1,12 | CLDND2                   | claudin domain containing 2                                                         |
| 1,12 | TRPC6                    | transient receptor potential cation channel, subfamily C, member 6                  |
| 1,12 | SH3BGR                   | SH3 domain binding glutamate-rich protein                                           |
| 1,12 | TSEN2                    | TSEN2 tRNA splicing endonuclease subunit                                            |
| 1,12 | ARL4C                    | ADP-ribosylation factor like GTPase 4C                                              |
| 1,12 | PSME1                    | proteasome activator subunit 1                                                      |
| 1,12 | BNIP1                    | BCL2/adenovirus E1B 19kD interacting protein like                                   |
| 1,12 | CDY2A                    | chromodomain protein, Y-linked, 2A                                                  |
| 1,12 | CPA2                     | carboxypeptidase A2 (pancreatic)                                                    |
| 1,12 | ATP1A2                   | ATPase, Na <sup>+</sup> /K <sup>+</sup> transporting, alpha 2 polypeptide           |
| 1,12 | LRRC69;<br>MIR4661       | leucine rich repeat containing 69; microRNA 4661                                    |
| 1,12 | MPEG1                    | macrophage expressed 1                                                              |
| 1,12 | C9orf139                 | chromosome 9 open reading frame 139                                                 |
| 1,12 | SIL1                     | SIL1 nucleotide exchange factor                                                     |
| 1,12 | IL2RB                    | interleukin 2 receptor, beta                                                        |
| 1,12 | GLS                      | glutaminase                                                                         |
| 1,12 | CNPPD1                   | cyclin Pas1/PHO80 domain containing 1                                               |
| 1,12 | TBX15                    | T-box 15                                                                            |
| 1,12 | RBM26                    | Memczak2013 ANTISENSE, CDS, coding, INTERNAL best transcript NM_022118              |
| 1,12 | ACSBG2                   | acyl-CoA synthetase bubblegum family member 2                                       |
| 1,12 | GLIPR1L1                 | GLI pathogenesis-related 1 like 1                                                   |
| 1,12 | TUBGCP3                  | Transcript Identified by AceView, Entrez Gene ID(s) 10426                           |
| 1,12 | FAIM2                    | Fas apoptotic inhibitory molecule 2                                                 |
| 1,12 | MUC4                     | mucin 4, cell surface associated                                                    |
| 1,12 | POU2AF1                  | POU class 2 associating factor 1                                                    |
| 1,12 | WI2-237311.2;<br>pajoyby | forkhead box L1-like; novel transcript; Transcript Identified by AceView            |
| 1,12 | THAP1                    | THAP domain containing, apoptosis associated protein 1                              |
| 1,12 | SLC2A4                   | solute carrier family 2 (facilitated glucose transporter), member 4                 |
| 1,12 | NME6                     | NME/NM23 nucleoside diphosphate kinase 6                                            |
| 1,12 | IVL                      | involucrin                                                                          |
| 1,12 | NFE2                     | nuclear factor, erythroid 2                                                         |

|      |            |                                                                                               |
|------|------------|-----------------------------------------------------------------------------------------------|
| 1,12 | KRT23      | keratin 23, type I                                                                            |
| 1,12 | CYP1A1     | cytochrome P450, family 1, subfamily A, polypeptide 1                                         |
| 1,12 | ND6        | NADH dehydrogenase, subunit 6 (complex I)                                                     |
| 1,12 | ACTC1      | actin, alpha, cardiac muscle 1                                                                |
| 1,12 | LHFPL5     | lipoma HMGIC fusion partner-like 5                                                            |
| 1,12 | KRTAP17-1  | keratin associated protein 17-1                                                               |
| 1,12 | PSMC4      | proteasome 26S subunit, ATPase 4                                                              |
| 1,12 | OR10G3     | olfactory receptor, family 10, subfamily G, member 3                                          |
| 1,12 | RPRML      | reprimin-like                                                                                 |
| 1,12 | SYCE3      | synaptonemal complex central element protein 3                                                |
| 1,12 | CHAF1B     | chromatin assembly factor 1, subunit B (p60)                                                  |
| 1,12 | ERICH2     | glutamate rich 2                                                                              |
| 1,12 | OTUD7A     | OTU deubiquitinase 7A                                                                         |
| 1,12 | TMEM8C     | transmembrane protein 8C                                                                      |
| 1,12 | MPND       | MPN domain containing                                                                         |
| 1,12 | B4GALT2    | Memczak2013 ANTISENSE, CDS, coding, INTERNAL best transcript NM_001005417                     |
| 1,12 | MTRNR2L3   | MT-RNR2-like 3                                                                                |
| 1,12 | CYP4A11    | cytochrome P450, family 4, subfamily A, polypeptide 11                                        |
| 1,12 | CASP10     | caspase 10                                                                                    |
| 1,12 | PRR29      | proline rich 29                                                                               |
| 1,12 | EIF3F      | Eukaryotic translation initiation factor 3 subunit F [Source:UniProtKB/Swiss-Prot;Acc:O00303] |
| 1,12 | SETD3      | Transcript Identified by AceView, Entrez Gene ID(s) 84193                                     |
| 1,12 | KIF2C      | Jeck2013 ALT_DONOR, coding, INTERNAL, intronic best transcript NM_006845                      |
| 1,12 | IER2       | immediate early response 2                                                                    |
| 1,12 | INO80E     | INO80 complex subunit E                                                                       |
| 1,12 | HMGN5      | high mobility group nucleosome binding domain 5                                               |
| 1,12 | TRIM74     | tripartite motif containing 74                                                                |
| 1,12 | LST1       | leukocyte specific transcript 1                                                               |
| 1,12 | PATE3      | prostate and testis expressed 3                                                               |
| 1,12 | RNF212     | ring finger protein 212                                                                       |
| 1,12 | TRIM52     | tripartite motif containing 52                                                                |
| 1,12 | OR2B11     | olfactory receptor, family 2, subfamily B, member 11                                          |
| 1,12 | C10orf25   | chromosome 10 open reading frame 25                                                           |
| 1,12 | NUTM2B     | NUT family member 2B                                                                          |
| 1,12 | NRN1       | neuritin 1                                                                                    |
| 1,12 | RBM14-RBM4 | RBM14-RBM4 readthrough                                                                        |
| 1,12 | NDUFA3     | NADH dehydrogenase (ubiquinone) 1 alpha subcomplex, 3, 9kDa                                   |
| 1,12 | TDRD5      | tudor domain containing 5                                                                     |
| 1,12 | B3GNT5     | UDP-GlcNAc:betaGal beta-1,3-N-acetylglucosaminyltransferase 5                                 |
| 1,12 | SHISA5     | shisa family member 5                                                                         |
| 1,12 | ACKR1      | atypical chemokine receptor 1 (Duffy blood group)                                             |

|      |                                                                         |                                                                                                            |
|------|-------------------------------------------------------------------------|------------------------------------------------------------------------------------------------------------|
| 1,12 | FBXO31                                                                  | Memczak2013 ANTISENSE, INTERNAL, intronic, ncRNA best transcript NR_024568                                 |
| 1,12 | GAGE2D;<br>GAGE13;<br>GAGE2E;<br>GAGE8;<br>GAGE2B;<br>GAGE2A;<br>GAGE2C | G antigen 2D; G antigen 13; G antigen 2E; G antigen 8;<br>G antigen 2B; G antigen 2A; G antigen 2C         |
| 1,12 | BRD2                                                                    | bromodomain containing 2                                                                                   |
| 1,12 | LOC100129307                                                            | putative UPF0607 protein ENSP00000383144                                                                   |
| 1,12 | CYB561                                                                  | cytochrome b561                                                                                            |
| 1,12 | TNKS                                                                    | tankyrase, TRF1-interacting ankyrin-related ADP-ribose polymerase                                          |
| 1,12 | LGALS8                                                                  | lectin, galactoside-binding, soluble, 8                                                                    |
| 1,12 | IFNG                                                                    | interferon, gamma                                                                                          |
| 1,12 | LDLRAP1                                                                 | low density lipoprotein receptor adaptor protein 1                                                         |
| 1,12 | LFNG; MIR4648                                                           | LFNG O-fucosylpeptide 3-beta-N-acetylglucosaminyltransferase; microRNA 4648                                |
| 1,12 | STMND1                                                                  | stathmin domain containing 1                                                                               |
| 1,12 | URGCP                                                                   | upregulator of cell proliferation                                                                          |
| 1,12 | LOC102724323;<br>RP11-67C2.2;<br>MARCH8                                 | uncharacterized LOC102724323; Transcript Identified by AceView, Entrez Gene ID(s) 220972; novel transcript |
| 1,12 | FHDC1                                                                   | FH2 domain containing 1                                                                                    |
| 1,12 | USP3                                                                    | Memczak2013 ALT_ACCEPTOR, ALT_DONOR, coding, INTERNAL, intronic best transcript NM_006537                  |
| 1,12 | ESCO2                                                                   | establishment of sister chromatid cohesion N-acetyltransferase 2                                           |
| 1,12 | CACNA1A                                                                 | calcium channel, voltage-dependent, P/Q type, alpha 1A subunit                                             |
| 1,12 | FAM76B                                                                  | family with sequence similarity 76, member B                                                               |
| 1,12 | CLSTN2                                                                  | calsyntenin 2                                                                                              |
| 1,12 | ZNF721;<br>ABCA11P                                                      | zinc finger protein 721; ATP binding cassette subfamily A member 11, pseudogene                            |
| 1,12 | GPHB5                                                                   | glycoprotein hormone beta 5                                                                                |
| 1,12 | RTN4R                                                                   | reticulon 4 receptor                                                                                       |
| 1,12 | SRPK2                                                                   | SRSF protein kinase 2                                                                                      |
| 1,12 | DEFB116                                                                 | defensin, beta 116                                                                                         |
| 1,12 | CIDECD                                                                  | cell death-inducing DFFA-like effector c                                                                   |
| 1,12 | DNAJC27                                                                 | DnaJ (Hsp40) homolog, subfamily C, member 27                                                               |
| 1,12 | PRSS58                                                                  | protease, serine, 58                                                                                       |
| 1,12 | SLCO6A1                                                                 | solute carrier organic anion transporter family, member 6A1                                                |
| 1,12 | TEFM                                                                    | transcription elongation factor, mitochondrial                                                             |
| 1,12 | MSRA                                                                    | methionine sulfoxide reductase A                                                                           |
| 1,12 | MADCAM1                                                                 | mucosal vascular addressin cell adhesion molecule 1                                                        |
| 1,12 | TTLL4                                                                   | tubulin tyrosine ligase-like family member 4                                                               |
| 1,12 | GOT1L1                                                                  | glutamic-oxaloacetic transaminase 1-like 1                                                                 |
| 1,12 | PRR13                                                                   | proline rich 13                                                                                            |

|      |              |                                                                                               |
|------|--------------|-----------------------------------------------------------------------------------------------|
| 1,12 | CCDC87       | coiled-coil domain containing 87                                                              |
| 1,12 | FCMR         | Fc fragment of IgM receptor                                                                   |
| 1,12 | INSRR        | insulin receptor-related receptor                                                             |
| 1,12 | BSN          | bassoon presynaptic cytomatrix protein                                                        |
| 1,12 | SORBS1       | Transcript Identified by AceView, Entrez Gene ID(s) 10580                                     |
| 1,12 | ODF1         | outer dense fiber of sperm tails 1                                                            |
| 1,12 | MYEF2        | myelin expression factor 2                                                                    |
| 1,12 | ZNF549       | zinc finger protein 549                                                                       |
| 1,12 | BCL11A       | B-cell CLL/lymphoma 11A (zinc finger protein)                                                 |
| 1,12 | A2M          | alpha-2-macroglobulin                                                                         |
| 1,12 | TAS2R41      | taste receptor, type 2, member 41                                                             |
| 1,12 | BMP15        | bone morphogenetic protein 15                                                                 |
| 1,12 | CCDC173      | coiled-coil domain containing 173                                                             |
| 1,12 | PTHLH        | parathyroid hormone-like hormone                                                              |
| 1,12 | ZMIZ1        | zinc finger, MIZ-type containing 1                                                            |
| 1,12 | OR1J4        | olfactory receptor, family 1, subfamily J, member 4                                           |
| 1,12 | PSME3        | proteasome activator subunit 3                                                                |
| 1,12 | PLA2G5       | phospholipase A2, group V                                                                     |
| 1,12 | DNAJB14      | DnaJ (Hsp40) homolog, subfamily B, member 14                                                  |
| 1,12 | PRKX         | protein kinase, X-linked                                                                      |
| 1,12 | CDHR5        | cadherin-related family member 5                                                              |
| 1,12 | NLGN4Y       | neuroligin 4, Y-linked                                                                        |
| 1,12 | ZNF235       | zinc finger protein 235                                                                       |
| 1,12 | CUTC         | cutC copper transporter                                                                       |
| 1,12 | PPP1R17      | protein phosphatase 1, regulatory subunit 17                                                  |
| 1,12 | TAT          | tyrosine aminotransferase                                                                     |
| 1,12 | MEST         | mesoderm specific transcript                                                                  |
| 1,12 | PPIAL4C      | peptidylprolyl isomerase A (cyclophilin A)-like 4C                                            |
| 1,12 | SH2D4B       | SH2 domain containing 4B                                                                      |
| 1,12 | CDX1         | caudal type homeobox 1                                                                        |
| 1,12 | C18orf25     | chromosome 18 open reading frame 25                                                           |
| 1,12 | U2SURP       | U2 snRNP-associated SURP domain containing                                                    |
| 1,12 | ATP11A       | ATPase, class VI, type 11A                                                                    |
| 1,12 | EPS8L1       | EPS8-like 1                                                                                   |
| 1,12 | CELA2B       | chymotrypsin-like elastase family, member 2B                                                  |
| 1,12 | PLA2G16      | phospholipase A2, group XVI                                                                   |
| 1,12 | XG; XGY2     | Xg blood group; Xg pseudogene, Y-linked 2                                                     |
| 1,12 | F3           | coagulation factor III (thromboplastin, tissue factor)                                        |
| 1,12 | LY86         | lymphocyte antigen 86                                                                         |
| 1,12 | ACTL9        | actin-like 9                                                                                  |
| 1,12 | GNDF-AS1     | GNDF antisense RNA 1 (head to head)                                                           |
| 1,12 | IQCF4; IQCF3 | IQ motif containing F5 pseudogene; Transcript Identified by AceView, Entrez Gene ID(s) 401067 |
| 1,12 | TGM4         | transglutaminase 4                                                                            |
| 1,12 | SULT1C4      | sulfotransferase family 1C member 4                                                           |
| 1,12 | PADI1        | peptidyl arginine deiminase, type I                                                           |
| 1,12 | DYRK4        | dual specificity tyrosine-(Y)-phosphorylation regulated kinase 4                              |

|      |                                |                                                                                                                                                    |
|------|--------------------------------|----------------------------------------------------------------------------------------------------------------------------------------------------|
| 1,12 | OPN1MW;<br>OPN1MW2;<br>OPN1MW3 | opsin 1 (cone pigments), medium-wave-sensitive; opsin 1 (cone pigments), medium-wave-sensitive 2; opsin 1 (cone pigments), medium-wave-sensitive 3 |
| 1,12 | NT5DC4                         | 5-nucleotidase domain containing 4                                                                                                                 |
| 1,12 | SPNS3                          | spinster homolog 3 (Drosophila)                                                                                                                    |
| 1,12 | OR5AP2                         | olfactory receptor, family 5, subfamily AP, member 2                                                                                               |
| 1,12 | POTEJ                          | POTE ankyrin domain family, member J                                                                                                               |
| 1,12 | GNG2                           | guanine nucleotide binding protein (G protein), gamma 2                                                                                            |
| 1,12 | CD163L1                        | CD163 molecule-like 1                                                                                                                              |
| 1,12 | AKAP5                          | A kinase (PRKA) anchor protein 5                                                                                                                   |
| 1,12 | RELA                           | v-rel avian reticuloendotheliosis viral oncogene homolog A                                                                                         |
| 1,12 | GOLGA8S                        | golgin A8 family, member S                                                                                                                         |
| 1,12 | SMG1                           | Salzman2013 ALT_ACCEPTOR, ALT_DONOR, coding, INTERNAL, intronic best transcript NM_015092                                                          |
| 1,12 | TEP1                           | telomerase-associated protein 1                                                                                                                    |
| 1,12 | PRAMEF9                        |                                                                                                                                                    |
| 1,12 | CBX7                           | chromobox homolog 7                                                                                                                                |
| 1,12 | OR51G1                         | olfactory receptor, family 51, subfamily G, member 1 (gene/pseudogene)                                                                             |
| 1,12 | CRYGN                          | crystallin gamma N                                                                                                                                 |
| 1,12 | CYP2D6                         | cytochrome P450, family 2, subfamily D, polypeptide 6                                                                                              |
| 1,12 | PLGRKT                         | plasminogen receptor, C-terminal lysine transmembrane protein                                                                                      |
| 1,12 | ZFP41                          | ZFP41 zinc finger protein                                                                                                                          |
| 1,12 | COG1                           | component of oligomeric golgi complex 1                                                                                                            |
| 1,12 | SPACA5B                        | sperm acrosome associated 5B                                                                                                                       |
| 1,12 | SCAP                           | Memczak2013 ANTISENSE, CDS, coding, INTERNAL best transcript NM_012235                                                                             |
| 1,12 | PCDHB1                         | protocadherin beta 1                                                                                                                               |
| 1,12 | LUM                            | lumican                                                                                                                                            |
| 1,12 | C20orf202                      | chromosome 20 open reading frame 202                                                                                                               |
| 1,12 | PRELP                          | proline/arginine-rich end leucine-rich repeat protein                                                                                              |
| 1,12 | SOD3                           | superoxide dismutase 3, extracellular                                                                                                              |
| 1,12 | PKD1L3                         | polycystic kidney disease 1-like 3                                                                                                                 |
| 1,12 | FAM184B                        | family with sequence similarity 184, member B                                                                                                      |
| 1,12 | OR5B17                         | olfactory receptor, family 5, subfamily B, member 17                                                                                               |
| 1,12 | ZSCAN23                        | zinc finger and SCAN domain containing 23                                                                                                          |
| 1,12 | ZNF358                         | zinc finger protein 358                                                                                                                            |
| 1,12 | ZNF91                          | zinc finger protein 91                                                                                                                             |
| 1,12 | TMPRSS2                        | transmembrane protease, serine 2                                                                                                                   |
| 1,12 | CCDC39                         | coiled-coil domain containing 39                                                                                                                   |
| 1,12 | EXTL1                          | exostosin-like glycosyltransferase 1                                                                                                               |
| 1,12 | USP25                          | ubiquitin specific peptidase 25                                                                                                                    |
| 1,12 | TYW1                           | tRNA-yW synthesizing protein 1 homolog (S. cerevisiae)                                                                                             |
| 1,12 | ZNF703                         | zinc finger protein 703                                                                                                                            |

|      |                         |                                                                                           |
|------|-------------------------|-------------------------------------------------------------------------------------------|
| 1,12 | SFRP2                   | secreted frizzled-related protein 2                                                       |
| 1,12 | FLJ45513; RP11-304F15.3 | uncharacterized LOC729220; novel transcript antisense to TAC4                             |
| 1,12 | CLN8                    | ceroid-lipofuscinosis, neuronal 8                                                         |
| 1,12 | CFTR                    | cystic fibrosis transmembrane conductance regulator                                       |
| 1,12 | IL22                    | interleukin 22                                                                            |
| 1,12 | TSPYL4                  | TSPY-like 4                                                                               |
| 1,12 | SOSTDC1                 | sclerostin domain containing 1                                                            |
| 1,12 | C11orf95                | chromosome 11 open reading frame 95                                                       |
| 1,12 | SNRPD3                  | small nuclear ribonucleoprotein D3 polypeptide                                            |
| 1,12 | KCTD13                  | potassium channel tetramerization domain containing 13                                    |
| 1,12 | LDOC1                   | leucine zipper, down-regulated in cancer 1                                                |
| 1,12 | SLCO4A1                 | solute carrier organic anion transporter family, member 4A1                               |
| 1,12 | NEU3                    | sialidase 3 (membrane sialidase)                                                          |
| 1,12 | KRTAP5-AS1              | KRTAP5-1/KRTAP5-2 antisense RNA 1                                                         |
| 1,12 | KRT6B                   | keratin 6B, type II                                                                       |
| 1,12 | GPN2                    | GPN-loop GTPase 2                                                                         |
| 1,12 | FAM159B                 | family with sequence similarity 159, member B                                             |
| 1,12 | MEIOC                   | meiosis specific with coiled-coil domain                                                  |
| 1,12 | C5orf22                 | chromosome 5 open reading frame 22                                                        |
| 1,12 | BANF1                   | barrier to autointegration factor 1                                                       |
| 1,12 | PDGFRL                  | platelet-derived growth factor receptor-like                                              |
| 1,12 | SAYSD1                  | SAYSVFN motif domain containing 1                                                         |
| 1,12 | PRAMEF2                 | PRAME family member 2                                                                     |
| 1,12 | TRAPPC11                | trafficking protein particle complex 11                                                   |
| 1,12 | USP10                   | ubiquitin specific peptidase 10                                                           |
| 1,12 | MLXIP                   | MLX interacting protein                                                                   |
| 1,12 | ZNF35                   | zinc finger protein 35                                                                    |
| 1,12 | BDH2                    | 3-hydroxybutyrate dehydrogenase, type 2                                                   |
| 1,12 | ADAM33                  | ADAM metallopeptidase domain 33                                                           |
| 1,12 | BLNK                    | Memczak2013 ALT_ACCEPTOR, ALT_DONOR, coding, INTERNAL, intronic best transcript NM_013314 |
| 1,12 | WDR86                   | WD repeat domain 86                                                                       |
| 1,12 | RRAGD                   | Ras-related GTP binding D                                                                 |
| 1,12 | GEMIN7                  | gem nuclear organelle associated protein 7                                                |
| 1,12 | SOX2                    | SRY box 2                                                                                 |
| 1,12 | PLA2G4C                 | phospholipase A2, group IVC (cytosolic, calcium-independent)                              |
| 1,12 | LRIG1                   |                                                                                           |
| 1,12 | TMEM138                 | transmembrane protein 138                                                                 |
| 1,12 | FAM231A                 | family with sequence similarity 231, member A                                             |
| 1,12 | KCNA3                   | potassium channel, voltage gated shaker related subfamily A, member 3                     |
| 1,11 | NOP58                   | NOP58 ribonucleoprotein                                                                   |
| 1,11 | PLEKHG5                 | pleckstrin homology domain containing, family G (with RhoGef domain) member 5             |
| 1,11 | FAM86C1                 | family with sequence similarity 86, member C1                                             |

|      |                               |                                                                                            |
|------|-------------------------------|--------------------------------------------------------------------------------------------|
| 1,11 | CEP68                         | centrosomal protein 68kDa                                                                  |
| 1,11 | SLC50A1                       | solute carrier family 50 (sugar efflux transporter), member 1                              |
| 1,11 | MT1F                          | metallothionein 1F                                                                         |
| 1,11 | LOC101928137;<br>RP11-314D7.2 | uncharacterized LOC101928137; novel transcript                                             |
| 1,11 | TSC22D2                       | TSC22 domain family, member 2                                                              |
| 1,11 | MAP3K2                        | mitogen-activated protein kinase kinase kinase 2                                           |
| 1,11 | DEDD2                         | death effector domain containing 2                                                         |
| 1,11 | TMEM39B                       | transmembrane protein 39B                                                                  |
| 1,11 | C1orf54                       | chromosome 1 open reading frame 54                                                         |
| 1,11 | COX6B2                        | cytochrome c oxidase subunit VIb polypeptide 2 (testis)                                    |
| 1,11 | RIMBP3                        | RIMS binding protein 3                                                                     |
| 1,11 | ZDHHC11B                      | zinc finger, DHHC-type containing 11B                                                      |
| 1,11 | KDM4A                         | lysine (K)-specific demethylase 4A                                                         |
| 1,11 | ZNF696                        | zinc finger protein 696                                                                    |
| 1,11 | C6orf15                       | chromosome 6 open reading frame 15                                                         |
| 1,11 | TIAM1                         | T-cell lymphoma invasion and metastasis 1                                                  |
| 1,11 | PANK4                         | pantothenate kinase 4                                                                      |
| 1,11 | DEFB123                       | defensin, beta 123                                                                         |
| 1,11 | CXCL13                        | chemokine (C-X-C motif) ligand 13                                                          |
| 1,11 | KIAA2026                      | KIAA2026                                                                                   |
| 1,11 | SHANK3                        | SH3 and multiple ankyrin repeat domains 3                                                  |
| 1,11 | SIRT6                         | sirtuin 6                                                                                  |
| 1,11 | ATP5G1                        | ATP synthase, H <sup>+</sup> transporting, mitochondrial Fo complex subunit C1 (subunit 9) |
| 1,11 | KCTD1                         | potassium channel tetramerization domain containing 1                                      |
| 1,11 | C17orf58                      | chromosome 17 open reading frame 58                                                        |
| 1,11 | STARD10                       | StAR-related lipid transfer domain containing 10                                           |
| 1,11 | PNMAL1                        | paraneoplastic Ma antigen family-like 1                                                    |
| 1,11 | LOC442028;<br>ANKRD20B        | uncharacterized LOC442028; Transcript Identified by AceView, Entrez Gene ID(s) 729171      |
| 1,11 | C1orf195                      | chromosome 1 open reading frame 195                                                        |
| 1,11 | CAMK1                         | calcium/calmodulin-dependent protein kinase I                                              |
| 1,11 | FSTL5                         | folliculin-like 5                                                                          |
| 1,11 | MANBAL                        | mannosidase, beta A, lysosomal-like                                                        |
| 1,11 | SORBS2                        | Transcript Identified by AceView, Entrez Gene ID(s) 8470                                   |
| 1,11 | C9orf84                       | chromosome 9 open reading frame 84                                                         |
| 1,11 | ELP3                          | elongator acetyltransferase complex subunit 3                                              |
| 1,11 | LCN1                          | lipocalin 1                                                                                |
| 1,11 | TMPRSS11B                     | transmembrane protease, serine 11B                                                         |
| 1,11 | CAB39L                        | calcium binding protein 39-like                                                            |
| 1,11 | SRPX                          | sushi-repeat containing protein, X-linked                                                  |
| 1,11 | GNRH1                         | gonadotropin releasing hormone 1                                                           |
| 1,11 | DISP2                         | dispatched homolog 2 (Drosophila)                                                          |
| 1,11 | UTS2R                         | urotensin 2 receptor                                                                       |
| 1,11 | RASL10A                       | RAS-like, family 10, member A                                                              |

|      |                         |                                                                                                     |
|------|-------------------------|-----------------------------------------------------------------------------------------------------|
| 1,11 | PPM1N                   | protein phosphatase, Mg <sup>2+</sup> /Mn <sup>2+</sup> dependent, 1N (putative)                    |
| 1,11 | METAP2                  | methionyl aminopeptidase 2                                                                          |
| 1,11 | PON1                    | paraoxonase 1                                                                                       |
| 1,11 | MS4A12                  | membrane-spanning 4-domains, subfamily A, member 12                                                 |
| 1,11 | HCLS1                   | hematopoietic cell-specific Lyn substrate 1                                                         |
| 1,11 | EPN1                    | epsin 1                                                                                             |
| 1,11 | STK11                   | serine/threonine kinase 11                                                                          |
| 1,11 | EGR1                    | early growth response 1                                                                             |
| 1,11 | OR2C1                   | olfactory receptor, family 2, subfamily C, member 1                                                 |
| 1,11 | RP11-732A19.2;<br>TAF10 | novel transcript, sense overlapping TAF10; Transcript Identified by AceView, Entrez Gene ID(s) 6881 |
| 1,11 | DPPA3                   | developmental pluripotency associated 3                                                             |
| 1,11 | TMEM170B                | transmembrane protein 170B                                                                          |
| 1,11 | GDPD3                   | glycerophosphodiester phosphodiesterase domain containing 3                                         |
| 1,11 | PNPO                    | pyridoxamine 5-phosphate oxidase                                                                    |
| 1,11 | ATG16L1                 | autophagy related 16-like 1                                                                         |
| 1,11 | NEDD4L                  | neural precursor cell expressed, developmentally down-regulated 4-like, E3 ubiquitin protein ligase |
| 1,11 | LTBP4                   | latent transforming growth factor beta binding protein 4                                            |
| 1,11 | ANKUB1                  | ankyrin repeat and ubiquitin domain containing 1                                                    |
| 1,11 | RAB17                   | RAB17, member RAS oncogene family                                                                   |
| 1,11 | FCGRT                   | Fc fragment of IgG, receptor, transporter, alpha                                                    |
| 1,11 | STX7                    | syntaxin 7                                                                                          |
| 1,11 | TMC1                    | transmembrane channel like 1                                                                        |
| 1,11 | TOMM6;<br>PRICKLE4      | translocase of outer mitochondrial membrane 6 homolog (yeast); prickly homolog 4                    |
| 1,11 | CLC                     | Charcot-Leyden crystal galectin                                                                     |
| 1,11 | ME3                     | malic enzyme 3, NADP(+)-dependent, mitochondrial                                                    |
| 1,11 | ARL11                   | ADP-ribosylation factor like GTPase 11                                                              |
| 1,11 | IRF2                    | interferon regulatory factor 2                                                                      |
| 1,11 | OR1D4                   | olfactory receptor, family 1, subfamily D, member 4 (gene/pseudogene)                               |
| 1,11 | RNF43                   | ring finger protein 43                                                                              |
| 1,11 | DLGAP1                  | discs, large (Drosophila) homolog-associated protein 1                                              |
| 1,11 | OGT                     | O-linked N-acetylglucosamine (GlcNAc) transferase                                                   |
| 1,11 | IKZF1                   | IKAROS family zinc finger 1                                                                         |
| 1,11 | UTP11L                  | UTP11-like, U3 small nucleolar ribonucleoprotein (yeast)                                            |
| 1,11 | ACTR3B                  | ARP3 actin-related protein 3 homolog B (yeast)                                                      |
| 1,11 | GPX3                    | glutathione peroxidase 3                                                                            |
| 1,11 | KIAA1211L               | KIAA1211-like                                                                                       |
| 1,11 | ZC4H2                   | zinc finger, C4H2 domain containing                                                                 |
| 1,11 | SULT6B1                 | sulfotransferase family 6B member 1                                                                 |
| 1,11 | CHDH                    | choline dehydrogenase                                                                               |

|      |                                |                                                                          |
|------|--------------------------------|--------------------------------------------------------------------------|
| 1,11 | PTCD2                          | pentatricopeptide repeat domain 2                                        |
| 1,11 | ATG16L1                        | autophagy related 16-like 1                                              |
| 1,11 | TMC7                           | transmembrane channel like 7                                             |
| 1,11 | PPP1R32                        | protein phosphatase 1, regulatory subunit 32                             |
| 1,11 | DBF4                           | Transcript Identified by AceView, Entrez Gene ID(s)<br>10926             |
| 1,11 | TTC5                           | tetratricopeptide repeat domain 5                                        |
| 1,11 | DDB2                           | damage-specific DNA binding protein 2                                    |
| 1,11 | MAPKAP1                        | mitogen-activated protein kinase associated protein 1                    |
| 1,11 | KLRD1                          | killer cell lectin-like receptor subfamily D, member 1                   |
| 1,11 | TNFRSF18                       | tumor necrosis factor receptor superfamily, member 18                    |
| 1,11 | FGFR4                          | fibroblast growth factor receptor 4                                      |
| 1,11 | CNDP1                          | carnosine dipeptidase 1 (metallopeptidase M20 family)                    |
| 1,11 | RAD52                          | RAD52 homolog, DNA repair protein                                        |
| 1,11 | BHMT2                          | betaine--homocysteine S-methyltransferase 2                              |
| 1,11 | C3orf84                        | chromosome 3 open reading frame 84                                       |
| 1,11 | DAND5                          | DAN domain family member 5, BMP antagonist                               |
| 1,11 | EDN1                           | endothelin 1                                                             |
| 1,11 | SCARA5                         | scavenger receptor class A, member 5                                     |
| 1,11 | KBTBD12                        | kelch repeat and BTB (POZ) domain containing 12                          |
| 1,11 | KDM4B                          | lysine (K)-specific demethylase 4B                                       |
| 1,11 | TTC27; MIR4765                 | tetratricopeptide repeat domain 27; microRNA 4765                        |
| 1,11 | CYP4V2                         | cytochrome P450, family 4, subfamily V, polypeptide 2                    |
| 1,11 | GPR89A                         | G protein-coupled receptor 89A                                           |
| 1,11 | PPP1R16A                       | protein phosphatase 1, regulatory subunit 16A                            |
| 1,11 | ITFG2                          | integrin alpha FG-GAP repeat containing 2                                |
| 1,11 | CCDC63                         | coiled-coil domain containing 63                                         |
| 1,11 | SSX2; SSX2B                    | synovial sarcoma, X breakpoint 2; synovial sarcoma, X<br>breakpoint 2B   |
| 1,11 | RIC3                           | RIC3 acetylcholine receptor chaperone                                    |
| 1,11 | CLEC12A                        | C-type lectin domain family 12, member A                                 |
| 1,11 | ADAM21                         | ADAM metallopeptidase domain 21                                          |
| 1,11 | ANKRD31                        | ankyrin repeat domain 31                                                 |
| 1,11 | IL17RB                         | interleukin 17 receptor B                                                |
| 1,11 | ARSI                           | arylsulfatase family, member I                                           |
| 1,11 | TRIM14                         | tripartite motif containing 14                                           |
| 1,11 | NUTM2A                         | NUT family member 2A                                                     |
| 1,11 | OR6Q1                          | olfactory receptor, family 6, subfamily Q, member 1<br>(gene/pseudogene) |
| 1,11 | BRE                            | brain and reproductive organ-expressed (TNFRSF1A<br>modulator)           |
| 1,11 | LOC102723701;<br>RP11-863K10.7 | uncharacterized LOC102723701; novel transcript,<br>antisense to ERLIN2   |
| 1,11 | LRRD1                          | leucine-rich repeats and death domain containing 1                       |
| 1,11 | BTBD18                         | BTB (POZ) domain containing 18                                           |
| 1,11 | MYL5                           | myosin light chain 5                                                     |
| 1,11 | ARHGEF37                       | Rho guanine nucleotide exchange factor 37                                |

|      |                                       |                                                                                                                                                                                                                                                                                                                              |
|------|---------------------------------------|------------------------------------------------------------------------------------------------------------------------------------------------------------------------------------------------------------------------------------------------------------------------------------------------------------------------------|
| 1,11 | TNFRSF10A                             | tumor necrosis factor receptor superfamily, member 10a                                                                                                                                                                                                                                                                       |
| 1,11 | C9orf50                               | chromosome 9 open reading frame 50                                                                                                                                                                                                                                                                                           |
| 1,11 | IFNL3                                 | interferon, lambda 3                                                                                                                                                                                                                                                                                                         |
| 1,11 | BHMT                                  | betaine--homocysteine S-methyltransferase                                                                                                                                                                                                                                                                                    |
| 1,11 | OR9Q2                                 | olfactory receptor, family 9, subfamily Q, member 2                                                                                                                                                                                                                                                                          |
| 1,11 | FOXP3                                 | forkhead box P3                                                                                                                                                                                                                                                                                                              |
| 1,11 | TFF2                                  | trefoil factor 2                                                                                                                                                                                                                                                                                                             |
| 1,11 | HBB                                   | hemoglobin, beta                                                                                                                                                                                                                                                                                                             |
| 1,11 | TMEM238                               | transmembrane protein 238                                                                                                                                                                                                                                                                                                    |
| 1,11 | AGAP5                                 | ArfGAP with GTPase domain, ankyrin repeat and PH domain 5                                                                                                                                                                                                                                                                    |
| 1,11 | PATL2                                 | protein associated with topoisomerase II homolog 2 (yeast)                                                                                                                                                                                                                                                                   |
| 1,11 | SHISA3                                | shisa family member 3                                                                                                                                                                                                                                                                                                        |
| 1,11 | ERRFI1                                | ERBB receptor feedback inhibitor 1                                                                                                                                                                                                                                                                                           |
| 1,11 | CEACAM18                              | carcinoembryonic antigen-related cell adhesion molecule 18                                                                                                                                                                                                                                                                   |
| 1,11 | ECHDC1                                | ethylmalonyl-CoA decarboxylase 1                                                                                                                                                                                                                                                                                             |
| 1,11 | HINT3                                 | histidine triad nucleotide binding protein 3                                                                                                                                                                                                                                                                                 |
| 1,11 | C9orf153                              | chromosome 9 open reading frame 153                                                                                                                                                                                                                                                                                          |
| 1,11 | LINC01140                             | long intergenic non-protein coding RNA 1140                                                                                                                                                                                                                                                                                  |
| 1,11 | HSPB7                                 | heat shock 27kDa protein family, member 7 (cardiovascular)                                                                                                                                                                                                                                                                   |
| 1,11 | NXN                                   | nucleoredoxin                                                                                                                                                                                                                                                                                                                |
| 1,11 | OPLAH                                 | 5-oxoprolinase (ATP-hydrolysing)                                                                                                                                                                                                                                                                                             |
| 1,11 | DEC1                                  | deleted in esophageal cancer 1                                                                                                                                                                                                                                                                                               |
| 1,11 | CYP2S1                                | cytochrome P450, family 2, subfamily S, polypeptide 1                                                                                                                                                                                                                                                                        |
| 1,11 | LTB4R; LTB4R2                         | leukotriene B4 receptor; leukotriene B4 receptor 2                                                                                                                                                                                                                                                                           |
| 1,11 | TBC1D31                               | TBC1 domain family, member 31                                                                                                                                                                                                                                                                                                |
| 1,11 | CHRNA2                                | cholinergic receptor, nicotinic beta 2                                                                                                                                                                                                                                                                                       |
| 1,11 | MRPL32                                | mitochondrial ribosomal protein L32                                                                                                                                                                                                                                                                                          |
| 1,11 | EYA2                                  | EYA transcriptional coactivator and phosphatase 2                                                                                                                                                                                                                                                                            |
| 1,11 | UBALD1                                | UBA-like domain containing 1                                                                                                                                                                                                                                                                                                 |
| 1,11 | C5orf66-AS1                           | C5orf66 antisense RNA 1                                                                                                                                                                                                                                                                                                      |
| 1,11 | FAM195A                               | family with sequence similarity 195, member A                                                                                                                                                                                                                                                                                |
| 1,11 | ENTPD7                                | ectonucleoside triphosphate diphosphohydrolase 7                                                                                                                                                                                                                                                                             |
| 1,11 | NR1D1                                 | nuclear receptor subfamily 1, group D, member 1                                                                                                                                                                                                                                                                              |
| 1,11 | CPNE6                                 | copine VI (neuronal)                                                                                                                                                                                                                                                                                                         |
| 1,11 | SLC35A3                               | solute carrier family 35 (UDP-N-acetylglucosamine (UDP-GlcNAc) transporter), member A3                                                                                                                                                                                                                                       |
| 1,11 | PRODH;<br>LOC102724788;<br>AC007325.2 | Homo sapiens proline dehydrogenase (oxidase) 1 (PRODH), transcript variant 2, mRNA.; Homo sapiens proline dehydrogenase (oxidase) 1 (PRODH), transcript variant 1, mRNA.; proline dehydrogenase 1, mitochondrial; Homo sapiens proline dehydrogenase (oxidase) 1, mRNA (cDNA clone MGC:148079 IMAGE:40108133), complete cds. |
| 1,11 | LARP7                                 | La ribonucleoprotein domain family, member 7                                                                                                                                                                                                                                                                                 |

|      |                           |                                                                                                                                         |
|------|---------------------------|-----------------------------------------------------------------------------------------------------------------------------------------|
| 1,11 | OR2H1                     | olfactory receptor, family 2, subfamily H, member 1                                                                                     |
| 1,11 | POFUT2                    | protein O-fucosyltransferase 2                                                                                                          |
| 1,11 | SMAP2                     | small ArfGAP2                                                                                                                           |
| 1,11 | ANKRD13A                  | ankyrin repeat domain 13A                                                                                                               |
| 1,11 | C14orf80                  | chromosome 14 open reading frame 80                                                                                                     |
| 1,11 | ZAN                       | zonadhesin (gene/pseudogene)                                                                                                            |
| 1,11 | ZKSCAN7                   | zinc finger with KRAB and SCAN domains 7                                                                                                |
| 1,11 | OR2B3                     | olfactory receptor, family 2, subfamily B, member 3                                                                                     |
| 1,11 | TMEM247                   | transmembrane protein 247                                                                                                               |
| 1,11 | MDS2                      | myelodysplastic syndrome 2 translocation associated                                                                                     |
| 1,11 | ARHGEF28                  | Rho guanine nucleotide exchange factor 28                                                                                               |
| 1,11 | LY6G6D                    | lymphocyte antigen 6 complex, locus G6D                                                                                                 |
| 1,11 | CAMKMT                    | calmodulin-lysine N-methyltransferase                                                                                                   |
| 1,11 | PDCL3                     | phosducin like 3                                                                                                                        |
| 1,11 | FAM227A                   | family with sequence similarity 227, member A                                                                                           |
| 1,11 | FRG2                      | FSHD region gene 2                                                                                                                      |
| 1,11 | PRKCD                     | protein kinase C, delta                                                                                                                 |
| 1,11 | CCDC86                    | coiled-coil domain containing 86                                                                                                        |
| 1,11 | SLC4A1AP                  | solute carrier family 4 (anion exchanger), member 1, adaptor protein                                                                    |
| 1,11 | ENPP4                     | ectonucleotide pyrophosphatase/phosphodiesterase 4 (putative)                                                                           |
| 1,11 | NEK7                      | NIMA-related kinase 7                                                                                                                   |
| 1,11 | DHRXS                     | Jeck2013 ALT_ACCEPTOR, ALT_DONOR, coding, INTERNAL, intronic best transcript NM_145177                                                  |
| 1,11 | STX1A                     | syntaxin 1A (brain)                                                                                                                     |
| 1,11 | OR52N1                    | olfactory receptor, family 52, subfamily N, member 1                                                                                    |
| 1,11 | FOXD3                     | forkhead box D3                                                                                                                         |
| 1,11 | ARNTL2                    | aryl hydrocarbon receptor nuclear translocator-like 2                                                                                   |
| 1,11 | ZRANB2                    | zinc finger, RAN-binding domain containing 2                                                                                            |
| 1,11 | GLP1R                     | glucagon-like peptide 1 receptor                                                                                                        |
| 1,11 | DSG1                      | desmoglein 1                                                                                                                            |
| 1,11 | SMURF2                    | SMAD specific E3 ubiquitin protein ligase 2                                                                                             |
| 1,11 | ANKRD30B                  | ankyrin repeat domain 30B                                                                                                               |
| 1,11 | TIGD6                     | tigger transposable element derived 6                                                                                                   |
| 1,11 | KLRC4-KLRK1; KLRK1; KLRC4 | KLRC4-KLRK1 readthrough; killer cell lectin-like receptor subfamily K, member 1; killer cell lectin-like receptor subfamily C, member 4 |
| 1,11 | SMTN                      | smoothelin                                                                                                                              |
| 1,11 | RGPD8; RGPD6              | RANBP2-like and GRIP domain containing 8; RANBP2-like and GRIP domain containing 6                                                      |
| 1,11 | PIK3CD-AS1                | PIK3CD antisense RNA 1                                                                                                                  |
| 1,11 | CEP152                    | centrosomal protein 152kDa                                                                                                              |
| 1,11 | PEMT                      | phosphatidylethanolamine N-methyltransferase                                                                                            |
| 1,11 | PAF1                      | PAF1 homolog, Paf1/RNA polymerase II complex component                                                                                  |
| 1,11 | SFXN2                     | sideroflexin 2                                                                                                                          |
| 1,11 | FAM177A1                  | family with sequence similarity 177, member A1                                                                                          |
| 1,11 | FMN2; ADH5P3              | formin 2; alcohol dehydrogenase 5 (class III), chi polypeptide, pseudogene 3                                                            |

|      |                                           |                                                                                                        |
|------|-------------------------------------------|--------------------------------------------------------------------------------------------------------|
| 1,11 | CYB5D2                                    | Transcript Identified by AceView, Entrez Gene ID(s)<br>124936                                          |
| 1,11 | CEP135                                    | centrosomal protein 135kDa                                                                             |
| 1,11 | ADGRF2                                    | adhesion G protein-coupled receptor F2                                                                 |
| 1,11 | LNK2                                      | ligand of numb-protein X 2                                                                             |
| 1,11 | BEX2                                      | brain expressed X-linked 2                                                                             |
| 1,11 | PISD; MIR7109                             | phosphatidylserine decarboxylase; microRNA 7109                                                        |
| 1,11 | C17orf78                                  | chromosome 17 open reading frame 78                                                                    |
| 1,11 | OR13C9                                    | olfactory receptor, family 13, subfamily C, member 9                                                   |
| 1,11 | RPS25                                     | ribosomal protein S25                                                                                  |
| 1,11 | BCKDK                                     | branched chain ketoacid dehydrogenase kinase                                                           |
| 1,11 | SLC4A8                                    | solute carrier family 4, sodium bicarbonate<br>cotransporter, member 8                                 |
| 1,11 | GGTLC1                                    | gamma-glutamyltransferase light chain 1                                                                |
| 1,11 | TMEM232                                   | transmembrane protein 232                                                                              |
| 1,11 | PLSCR3;<br>TMEM256;<br>TMEM256-<br>PLSCR3 | phospholipid scramblase 3; transmembrane protein<br>256; TMEM256-PLSCR3 readthrough (NMD<br>candidate) |
| 1,11 | MLNR                                      | motilin receptor                                                                                       |
| 1,11 | OXA1L                                     | oxidase (cytochrome c) assembly 1-like                                                                 |
| 1,11 | ADH1B                                     | alcohol dehydrogenase 1B (class I), beta polypeptide                                                   |
| 1,11 | AADAT                                     | amino adipate aminotransferase                                                                         |
| 1,11 | COMP                                      | cartilage oligomeric matrix protein                                                                    |
| 1,11 | DEF6                                      | DEF6 guanine nucleotide exchange factor                                                                |
| 1,11 | GCSAML                                    | germinal center-associated, signaling and motility-like                                                |
| 1,11 | TROAP                                     | trophinin associated protein                                                                           |
| 1,11 | C6orf52                                   | chromosome 6 open reading frame 52                                                                     |
| 1,11 | DUS2                                      | dihydrouridine synthase 2                                                                              |
| 1,11 | DLX2                                      | distal-less homeobox 2                                                                                 |
| 1,11 | C10orf113                                 | chromosome 10 open reading frame 113                                                                   |
| 1,11 | APOL4                                     | apolipoprotein L, 4                                                                                    |
| 1,11 | COX20                                     | COX20 cytochrome c oxidase assembly factor                                                             |
| 1,11 | VCX3B; VCX                                | variable charge, X-linked 3B; variable charge, X-linked                                                |
| 1,11 | LRRC4C                                    | leucine rich repeat containing 4C                                                                      |
| 1,11 | ACPP                                      | acid phosphatase, prostate                                                                             |
| 1,11 | BMP5                                      | bone morphogenetic protein 5                                                                           |
| 1,11 | SGCD                                      | sarcoglycan delta                                                                                      |
| 1,11 | TAF9B                                     | TAF9B RNA polymerase II, TATA box binding<br>protein (TBP)-associated factor, 31kDa                    |
| 1,11 | AMZ1                                      | archaelysin family metalloproteinase 1                                                                 |
| 1,11 | WDR41                                     | WD repeat domain 41                                                                                    |
| 1,11 | PAX1                                      | paired box 1                                                                                           |
| 1,11 | CABP4                                     | calcium binding protein 4                                                                              |
| 1,11 | TKTL1                                     | transketolase-like 1                                                                                   |
| 1,11 | PNPLA3                                    | patatin-like phospholipase domain containing 3                                                         |
| 1,11 | BRMS1L                                    | Transcript Identified by AceView, Entrez Gene ID(s)<br>84312                                           |
| 1,11 | C14orf132                                 | chromosome 14 open reading frame 132                                                                   |

|      |            |                                                                      |
|------|------------|----------------------------------------------------------------------|
| 1,11 | OR51G2     | olfactory receptor, family 51, subfamily G, member 2                 |
| 1,11 | SLC35F2    | solute carrier family 35, member F2                                  |
| 1,11 | C2orf27A   | chromosome 2 open reading frame 27A                                  |
| 1,11 | VCX3A; VCX | variable charge, X-linked 3A; variable charge, X-linked              |
| 1,11 | AGMO       | alkylglycerol monooxygenase                                          |
| 1,11 | SMYD5      | SMYD family member 5                                                 |
| 1,11 | SPERT      | spermatid associated                                                 |
| 1,11 | EVI5       | Transcript Identified by AceView, Entrez Gene ID(s)<br>7813          |
| 1,11 | C9orf142   | chromosome 9 open reading frame 142                                  |
| 1,11 | DUOXA2     | dual oxidase maturation factor 2                                     |
| 1,11 | SRRM4      | serine/arginine repetitive matrix 4                                  |
| 1,11 | CDC25A     | cell division cycle 25A                                              |
| 1,11 | CCNO       | cyclin O                                                             |
| 1,11 | RABGGTA    | Rab geranylgeranyltransferase, alpha subunit                         |
| 1,11 | OR1J2      | olfactory receptor, family 1, subfamily J, member 2                  |
| 1,11 | ZNF510     | zinc finger protein 510                                              |
| 1,11 | EIF1AX     | eukaryotic translation initiation factor 1A, X-linked                |
| 1,11 | CYTH4      | cytohesin 4                                                          |
| 1,11 | OR12D3     | olfactory receptor, family 12, subfamily D, member 3                 |
| 1,11 | DHX37      | DEAH (Asp-Glu-Ala-His) box polypeptide 37                            |
| 1,11 | DEFB113    | defensin, beta 113                                                   |
| 1,11 | BEND2      | BEN domain containing 2                                              |
| 1,11 | ESRRB      | estrogen-related receptor beta                                       |
| 1,11 | JMJD8      | jumonji domain containing 8                                          |
| 1,11 | TFF3       | trefoil factor 3                                                     |
| 1,11 | TSSK6      | testis-specific serine kinase 6                                      |
| 1,11 | PAQR8      | progesterin and adipoQ receptor family member VIII                   |
| 1,11 | ZNF486     | zinc finger protein 486                                              |
| 1,11 | CHMP7      | Transcript Identified by AceView, Entrez Gene ID(s)<br>91782         |
| 1,11 | NRXN2      | neurexin 2                                                           |
| 1,11 | MEGF6      | multiple EGF-like-domains 6                                          |
| 1,11 | MZF1       | myeloid zinc finger 1                                                |
| 1,11 | GOLGA6A    | golgin A6 family, member A                                           |
| 1,11 | FASTKD3    | FAST kinase domains 3                                                |
| 1,11 | FGF9       | fibroblast growth factor 9                                           |
| 1,11 | GAS7       | growth arrest-specific 7                                             |
| 1,11 | TERT       | telomerase reverse transcriptase                                     |
| 1,11 | ABCA12     | ATP binding cassette subfamily A member 12                           |
| 1,11 | SOX10      | SRY box 10                                                           |
| 1,11 | NT5C       | 5, 3-nucleotidase, cytosolic                                         |
| 1,11 | THUMP3-AS1 | THUMP3 antisense RNA 1                                               |
| 1,11 | TBC1D8     | TBC1 domain family, member 8 (with GRAM domain)                      |
| 1,11 | SLC6A11    | solute carrier family 6 (neurotransmitter transporter),<br>member 11 |
| 1,11 | HIBCH      | 3-hydroxyisobutyryl-CoA hydrolase                                    |

|      |                       |                                                                                                                 |
|------|-----------------------|-----------------------------------------------------------------------------------------------------------------|
| 1,11 | POGZ                  | Transcript Identified by AceView, Entrez Gene ID(s)<br>23126                                                    |
| 1,11 | NOL7                  | nucleolar protein 7                                                                                             |
| 1,11 | ASIP                  | agouti signaling protein                                                                                        |
| 1,11 | VIM                   | Jeck2013 ANTISENSE, coding, INTERNAL, intronic<br>best transcript NM_003380                                     |
| 1,11 | CSNK2A3               | casein kinase 2, alpha 3 polypeptide                                                                            |
| 1,11 | XYLB                  | xylulokinase homolog (H. influenzae)                                                                            |
| 1,11 | BCAN                  | brevican                                                                                                        |
| 1,11 | AVP                   | arginine vasopressin                                                                                            |
| 1,11 | ZNF490                | zinc finger protein 490                                                                                         |
| 1,11 | INPP5J                | inositol polyphosphate-5-phosphatase J                                                                          |
| 1,11 | ANTXRL                | anthrax toxin receptor-like                                                                                     |
| 1,11 | SCML2                 | sex comb on midleg-like 2 (Drosophila)                                                                          |
| 1,11 | GATA2                 | GATA binding protein 2                                                                                          |
| 1,11 | INTS4                 | integrator complex subunit 4                                                                                    |
| 1,11 | UBL3                  | ubiquitin-like 3                                                                                                |
| 1,11 | USP17L27;<br>USP17L28 | ubiquitin specific peptidase 17-like family member 27;<br>ubiquitin specific peptidase 17-like family member 28 |
| 1,11 | USP17L28;<br>USP17L30 | ubiquitin specific peptidase 17-like family member 28;<br>ubiquitin specific peptidase 17-like family member 30 |
| 1,11 | USP17L29;<br>USP17L5  | ubiquitin specific peptidase 17-like family member 29;<br>ubiquitin specific peptidase 17-like family member 5  |
| 1,11 | USP17L25;<br>USP17L30 | ubiquitin specific peptidase 17-like family member 25;<br>ubiquitin specific peptidase 17-like family member 30 |
| 1,11 | RNF19B                | Memczak2013 ANTISENSE, CDS, coding,<br>INTERNAL best transcript NM_153341                                       |
| 1,11 | HIST1H4B              | histone cluster 1, H4b                                                                                          |
| 1,11 | RHBDF1                | rhomboid 5 homolog 1 (Drosophila)                                                                               |
| 1,11 | TUBA3E                | tubulin, alpha 3e                                                                                               |
| 1,11 | TMEM99                | transmembrane protein 99                                                                                        |
| 1,11 | GTF2A2                | general transcription factor IIA 2                                                                              |
| 1,11 | HORMAD2               | HORMA domain containing 2                                                                                       |
| 1,11 | ZDHHC23               | zinc finger, DHHC-type containing 23                                                                            |
| 1,11 | GLYATL1               | glycine-N-acyltransferase-like 1                                                                                |
| 1,11 | OR6B2                 | olfactory receptor, family 6, subfamily B, member 2                                                             |
| 1,11 | IL10RA                | interleukin 10 receptor, alpha                                                                                  |
| 1,11 | TNFRSF11B             | tumor necrosis factor receptor superfamily, member<br>11b                                                       |
| 1,11 | LRRC20                | leucine rich repeat containing 20                                                                               |
| 1,11 | NKD2                  | naked cuticle homolog 2 (Drosophila)                                                                            |
| 1,11 | OR2T34                | olfactory receptor, family 2, subfamily T, member 34                                                            |
| 1,11 | MBOAT7                | membrane bound O-acyltransferase domain containing<br>7                                                         |

|      |                              |                                                                                                                                                                               |
|------|------------------------------|-------------------------------------------------------------------------------------------------------------------------------------------------------------------------------|
| 1,11 | SEC22B                       | Salzman2013 ALT_ACCEPTOR, CDS, coding, INTERNAL, OVCODE, OVEXON best transcript NM_004892; Salzman2013 ANNOTATED, CDS, coding, OVCODE, OVEXON, UTR3 best transcript NM_004892 |
| 1,11 | ELMOD3                       | ELMO/CED-12 domain containing 3                                                                                                                                               |
| 1,11 | ZSCAN5A                      | zinc finger and SCAN domain containing 5A                                                                                                                                     |
| 1,11 | BBS4                         | Bardet-Biedl syndrome 4                                                                                                                                                       |
| 1,11 | OXNAD1                       | oxidoreductase NAD-binding domain containing 1                                                                                                                                |
| 1,11 | IQCA1                        | IQ motif containing with AAA domain 1                                                                                                                                         |
| 1,11 | USP7                         | ubiquitin specific peptidase 7 (herpes virus-associated)                                                                                                                      |
| 1,11 | PPP2R2D                      | protein phosphatase 2, regulatory subunit B, delta                                                                                                                            |
| 1,11 | PRKG2                        | protein kinase, cGMP-dependent, type II                                                                                                                                       |
| 1,11 | AKT2                         | v-akt murine thymoma viral oncogene homolog 2                                                                                                                                 |
| 1,11 | RBM44                        | RNA binding motif protein 44                                                                                                                                                  |
| 1,11 | KIAA1462                     | KIAA1462                                                                                                                                                                      |
| 1,11 | ASB18                        | ankyrin repeat and SOCS box containing 18                                                                                                                                     |
| 1,11 | ANLN                         | Transcript Identified by AceView, Entrez Gene ID(s) 54443                                                                                                                     |
| 1,11 | ATP2B2                       | ATPase, Ca++ transporting, plasma membrane 2                                                                                                                                  |
| 1,11 | FLAD1                        | flavin adenine dinucleotide synthetase 1                                                                                                                                      |
| 1,11 | GOLT1A                       | golgi transport 1A                                                                                                                                                            |
| 1,11 | GRIN2B                       | glutamate receptor, ionotropic, N-methyl D-aspartate 2B                                                                                                                       |
| 1,11 | TBX5                         | T-box 5                                                                                                                                                                       |
| 1,11 | ZNF98                        | zinc finger protein 98                                                                                                                                                        |
| 1,11 | MGEA5                        | Salzman2013 ALT_ACCEPTOR, ALT_DONOR, coding, INTERNAL, intronic best transcript NM_012215                                                                                     |
| 1,11 | CBX6                         | chromobox homolog 6                                                                                                                                                           |
| 1,11 | NPAS2                        | neuronal PAS domain protein 2                                                                                                                                                 |
| 1,11 | NAGS                         | N-acetylglutamate synthase                                                                                                                                                    |
| 1,11 | PLA2G2D                      | phospholipase A2, group IID                                                                                                                                                   |
| 1,11 | TMEM110                      | transmembrane protein 110                                                                                                                                                     |
| 1,11 | RRP1                         | ribosomal RNA processing 1                                                                                                                                                    |
| 1,11 | DNTTIP2                      | deoxynucleotidyltransferase, terminal, interacting protein 2                                                                                                                  |
| 1,11 | H2AFB1;<br>H2AFB2;<br>H2AFB3 | H2A histone family, member B1; H2A histone family, member B2; H2A histone family, member B3                                                                                   |
| 1,11 | PSCA                         | prostate stem cell antigen                                                                                                                                                    |
| 1,11 | PRPF19                       | Memczak2013 ALT_ACCEPTOR, ALT_DONOR, coding, INTERNAL, intronic best transcript NM_014502                                                                                     |
| 1,11 | HOXC13                       | homeobox C13                                                                                                                                                                  |
| 1,11 | HCFC2                        | host cell factor C2                                                                                                                                                           |
| 1,11 | TIPIN                        | TIMELESS interacting protein                                                                                                                                                  |
| 1,11 | SLC16A1                      | solute carrier family 16 (monocarboxylate transporter), member 1                                                                                                              |

|      |           |                                                                                                                                      |
|------|-----------|--------------------------------------------------------------------------------------------------------------------------------------|
| 1,11 | OR52Z1    | olfactory receptor, family 52, subfamily Z, member 1<br>(gene/pseudogene)                                                            |
| 1,11 | PHKG1     | phosphorylase kinase, gamma 1 (muscle)                                                                                               |
| 1,11 | PLEKHA3   | Transcript Identified by AceView, Entrez Gene ID(s)<br>65977                                                                         |
| 1,11 | CAPZA3    | capping protein (actin filament) muscle Z-line, alpha 3                                                                              |
| 1,11 | MAPK12    | mitogen-activated protein kinase 12                                                                                                  |
| 1,11 | MLXIP     | MLX interacting protein                                                                                                              |
| 1,11 | AQP7      | aquaporin 7                                                                                                                          |
| 1,11 | PRAMEF2   | PRAME family member 2                                                                                                                |
| 1,11 | CCDC88B   | coiled-coil domain containing 88B                                                                                                    |
| 1,11 | PDE6G     | phosphodiesterase 6G, cGMP-specific, rod, gamma                                                                                      |
| 1,11 | INPP5B    | inositol polyphosphate-5-phosphatase B                                                                                               |
| 1,11 | SPRYD7    | SPRY domain containing 7                                                                                                             |
| 1,11 | MDM4      | MDM4, p53 regulator                                                                                                                  |
| 1,11 | NR2F2     | nuclear receptor subfamily 2, group F, member 2                                                                                      |
| 1,11 | NHLRC1    | NHL repeat containing E3 ubiquitin protein ligase 1                                                                                  |
| 1,11 | KLK4      | kallikrein related peptidase 4                                                                                                       |
| 1,11 | MAFTRR    | MAF transcriptional regulator RNA                                                                                                    |
| 1,11 | WNT16     | wingless-type MMTV integration site family, member<br>16                                                                             |
| 1,11 | NIPAL3    | NIPA-like domain containing 3                                                                                                        |
| 1,11 | TMC3      | transmembrane channel like 3                                                                                                         |
| 1,11 | BMP2K     | BMP2 inducible kinase                                                                                                                |
| 1,11 | NMUR1     | neuromedin U receptor 1                                                                                                              |
| 1,11 | METTL11B  | methyltransferase like 11B                                                                                                           |
| 1,11 | CFL2      | cofilin 2 (muscle)                                                                                                                   |
| 1,11 | LINC00885 | long intergenic non-protein coding RNA 885                                                                                           |
| 1,11 | TTLL3     | tubulin tyrosine ligase-like family member 3                                                                                         |
| 1,11 | RSAD2     | radical S-adenosyl methionine domain containing 2                                                                                    |
| 1,11 | CYP4B1    | cytochrome P450, family 4, subfamily B, polypeptide 1                                                                                |
| 1,11 | COL26A1   | collagen, type XXVI, alpha 1                                                                                                         |
| 1,11 | ALDH3A1   | aldehyde dehydrogenase 3 family, member A1                                                                                           |
| 1,11 | VSIG8     | V-set and immunoglobulin domain containing 8                                                                                         |
| 1,11 | FBP1      | fructose-1,6-bisphosphatase 1                                                                                                        |
| 1,11 | EXOC3     | Memczak2013 ANTISENSE, CDS, coding,<br>INTERNAL best transcript NM_007277                                                            |
| 1,11 | ITM2A     | integral membrane protein 2A                                                                                                         |
| 1,11 | ANHX      | anomalous homeobox                                                                                                                   |
| 1,11 | CXorf23   | chromosome X open reading frame 23                                                                                                   |
| 1,11 | TMEM235   | transmembrane protein 235                                                                                                            |
| 1,11 | LGALS2    | lectin, galactoside-binding, soluble, 2                                                                                              |
| 1,10 | IL11RA    | interleukin 11 receptor, alpha                                                                                                       |
| 1,10 | TGFB3     | transforming growth factor beta 3                                                                                                    |
| 1,10 | ABO       | ABO blood group (transferase A, alpha 1-3-N-<br>acetylgalactosaminyltransferase; transferase B, alpha 1-<br>3-galactosyltransferase) |
| 1,10 | ERAS      | ES cell expressed Ras                                                                                                                |
| 1,10 | CHORDC1   | cysteine and histidine rich domain containing 1                                                                                      |

|      |                    |                                                                                           |
|------|--------------------|-------------------------------------------------------------------------------------------|
| 1,10 | ZSCAN21            | zinc finger and SCAN domain containing 21                                                 |
| 1,10 | ZNF852             | zinc finger protein 852                                                                   |
| 1,10 | SLC5A7             | solute carrier family 5 (sodium/choline cotransporter), member 7                          |
| 1,10 | LINGO2             | leucine rich repeat and Ig domain containing 2                                            |
| 1,10 | BIRC2              | baculoviral IAP repeat containing 2                                                       |
| 1,10 | ZNHIT3             | zinc finger, HIT-type containing 3                                                        |
| 1,10 | FAM231B            | family with sequence similarity 231, member B                                             |
| 1,10 | MS4A2              | membrane-spanning 4-domains, subfamily A, member 2                                        |
| 1,10 | MBD3L1             | methyl-CpG binding domain protein 3-like 1                                                |
| 1,10 | TINAG              | tubulointerstitial nephritis antigen                                                      |
| 1,10 | TMCC1              | transmembrane and coiled-coil domain family 1                                             |
| 1,10 | TIMD4              | T-cell immunoglobulin and mucin domain containing 4                                       |
| 1,10 | PLK5               | polo-like kinase 5                                                                        |
| 1,10 | DEFA3              | defensin, alpha 3, neutrophil-specific                                                    |
| 1,10 | C4orf46            | chromosome 4 open reading frame 46                                                        |
| 1,10 | NETO1              | neuropilin (NRP) and tolloid (TLL)-like 1                                                 |
| 1,10 | OSBPL5             | Memczak2013 ALT_ACCEPTOR, ALT_DONOR, coding, INTERNAL, intronic best transcript NM_020896 |
| 1,10 | PI3                | peptidase inhibitor 3, skin-derived                                                       |
| 1,10 | ZNF729             | zinc finger protein 729                                                                   |
| 1,10 | RNASET2            | ribonuclease T2                                                                           |
| 1,10 | MFS14A             | major facilitator superfamily domain containing 14A                                       |
| 1,10 | UQCRLH             | ubiquinol-cytochrome c reductase hinge protein like                                       |
| 1,10 | ZNF449             | zinc finger protein 449                                                                   |
| 1,10 | HMGXB4             | HMG box domain containing 4                                                               |
| 1,10 | TMEM251            | transmembrane protein 251                                                                 |
| 1,10 | ZNF45              | zinc finger protein 45                                                                    |
| 1,10 | NDUFA3             | NADH dehydrogenase (ubiquinone) 1 alpha subcomplex, 3, 9kDa                               |
| 1,10 | S100A11            | S100 calcium binding protein A11                                                          |
| 1,10 | OR7C2              | olfactory receptor, family 7, subfamily C, member 2                                       |
| 1,10 | FAM24B             | family with sequence similarity 24, member B                                              |
| 1,10 | C8orf89            | chromosome 8 open reading frame 89                                                        |
| 1,10 | COQ4               | coenzyme Q4                                                                               |
| 1,10 | PNN                | pinin, desmosome associated protein                                                       |
| 1,10 | PDCD1LG2           | programmed cell death 1 ligand 2                                                          |
| 1,10 | MARVELD3           | MARVEL domain containing 3                                                                |
| 1,10 | ARG1               | arginase 1                                                                                |
| 1,10 | PRDM12             | PR domain containing 12                                                                   |
| 1,10 | KRTAP23-1          | keratin associated protein 23-1                                                           |
| 1,10 | CD46               | Transcript Identified by AceView, Entrez Gene ID(s) 4179                                  |
| 1,10 | LGALS7;<br>LGALS7B | lectin, galactoside-binding, soluble, 7; lectin, galactoside-binding, soluble, 7B         |
| 1,10 | YLP1               | YLP motif containing 1                                                                    |
| 1,10 | FMN1               | formin 1                                                                                  |

|      |                   |                                                                                                  |
|------|-------------------|--------------------------------------------------------------------------------------------------|
| 1,10 | SFTP2;<br>SFTP1   | surfactant protein 2; surfactant protein 1                                                       |
| 1,10 | GOLGA6L6          | golgin A6 family-like 6                                                                          |
| 1,10 | TNNI2             | troponin I type 2 (skeletal, fast)                                                               |
| 1,10 | RPS6KB2           | ribosomal protein S6 kinase, 70kDa, polypeptide 2                                                |
| 1,10 | ANP32C            | acidic nuclear phosphoprotein 32 family member C                                                 |
| 1,10 | EVPL              | envoplakin-like                                                                                  |
| 1,10 | OR5R1             | olfactory receptor, family 5, subfamily R, member 1 (gene/pseudogene)                            |
| 1,10 | HABP2             | hyaluronan binding protein 2                                                                     |
| 1,10 | STIM2             | stromal interaction molecule 2                                                                   |
| 1,10 | GPR34             | G protein-coupled receptor 34                                                                    |
| 1,10 | RAB2A             | Memczak2013 ALT_ACCEPTOR, ALT_DONOR, coding, INTERNAL, intronic best transcript NM_002865        |
| 1,10 | CCBL2;<br>RBMXL1  | cysteine conjugate-beta lyase 2; RNA binding motif protein, X-linked-like 1                      |
| 1,10 | HOOK1             | hook microtubule-tethering protein 1                                                             |
| 1,10 | GGT1              | gamma-glutamyltransferase 1                                                                      |
| 1,10 | NPS               | neuropeptide S                                                                                   |
| 1,10 | FRMD6             | FERM domain containing 6                                                                         |
| 1,10 | ARHGAP28          | Rho GTPase activating protein 28                                                                 |
| 1,10 | TBC1D28           | TBC1 domain family, member 28                                                                    |
| 1,10 | HTR5A-AS1         | HTR5A antisense RNA 1                                                                            |
| 1,10 | FOXO4L6           | forkhead box O4-like 6                                                                           |
| 1,10 | ANTXR2            | anthrax toxin receptor 2                                                                         |
| 1,10 | MOGAT2            | monoacylglycerol O-acyltransferase 2                                                             |
| 1,10 | PGM5              | phosphoglucomutase 5                                                                             |
| 1,10 | DAPL1;<br>OR7E89P | death associated protein like 1; olfactory receptor, family 7, subfamily E, member 89 pseudogene |
| 1,10 | SARDH             | sarcosine dehydrogenase                                                                          |
| 1,10 | RNF148            | ring finger protein 148                                                                          |
| 1,10 | PLEKHH2           | pleckstrin homology domain containing, family H (with MyTH4 domain) member 2                     |
| 1,10 | PRODH             | proline dehydrogenase (oxidase) 1                                                                |
| 1,10 | PRDX3             | peroxiredoxin 3                                                                                  |
| 1,10 | ARMC5             | armadillo repeat containing 5                                                                    |
| 1,10 | NOD2              | nucleotide-binding oligomerization domain containing 2                                           |
| 1,10 | FCHSD1            | FCH and double SH3 domains 1                                                                     |
| 1,10 | EPSTI1            | epithelial stromal interaction 1 (breast)                                                        |
| 1,10 | DLGAP1            | Memczak2013 ANTISENSE, coding, INTERNAL, intronic best transcript NM_001242765                   |
| 1,10 | CTAG1B;<br>CTAG1A | cancer/testis antigen 1B; cancer/testis antigen 1A                                               |
| 1,10 | NLRP8             | NLR family, pyrin domain containing 8                                                            |
| 1,10 | CTBS              | chitinase, di-N-acetyl-                                                                          |
| 1,10 | CCDC174           | coiled-coil domain containing 174                                                                |
| 1,10 | ECE2              | endothelin converting enzyme 2                                                                   |
| 1,10 | RBP3              | retinol binding protein 3, interstitial                                                          |

|      |                            |                                                                                    |
|------|----------------------------|------------------------------------------------------------------------------------|
| 1,10 | NPPA                       | natriuretic peptide A                                                              |
| 1,10 | TM4SF18                    | transmembrane 4 L six family member 18                                             |
| 1,10 | MKL1                       | megakaryoblastic leukemia (translocation) 1                                        |
| 1,10 | SART3                      | squamous cell carcinoma antigen recognized by T-cells 3                            |
| 1,10 | LGALS9C;<br>LGALS9B        | lectin, galactoside-binding, soluble, 9C; lectin, galactoside-binding, soluble, 9B |
| 1,10 | GBGT1                      | globoside alpha-1,3-N-acetylgalactosaminyltransferase 1                            |
| 1,10 | NLRP2                      | NLR family, pyrin domain containing 2                                              |
| 1,10 | WDR91                      | WD repeat domain 91                                                                |
| 1,10 | YEATS2                     | Memczak2013 ANTISENSE, coding, INTERNAL, intronic best transcript NM_018023        |
| 1,10 | EPS15                      | epidermal growth factor receptor pathway substrate 15                              |
| 1,10 | SULT2B1                    | sulfotransferase family 2B member 1                                                |
| 1,10 | HELT                       | helt bHLH transcription factor                                                     |
| 1,10 | RP11-998D10.7;<br>FLJ10357 | Transcript Identified by AceView, Entrez Gene ID(s) 55701                          |
| 1,10 | FAM9B                      | family with sequence similarity 9, member B                                        |
| 1,10 | RRAGB                      | Ras-related GTP binding B                                                          |
| 1,10 | PARM1                      | prostate androgen-regulated mucin-like protein 1                                   |
| 1,10 | IQCG                       | IQ motif containing G                                                              |
| 1,10 | ITGA9                      | integrin alpha 9                                                                   |
| 1,10 | POLG2                      | polymerase (DNA directed), gamma 2, accessory subunit                              |
| 1,10 | PHEX                       | phosphate regulating endopeptidase homolog, X-linked                               |
| 1,10 | SALL3                      | spalt-like transcription factor 3                                                  |
| 1,10 | FAM204A                    | family with sequence similarity 204, member A                                      |
| 1,10 | C17orf51                   | chromosome 17 open reading frame 51                                                |
| 1,10 | C1orf204                   | chromosome 1 open reading frame 204                                                |
| 1,10 | SUMO4                      | small ubiquitin-like modifier 4                                                    |
| 1,10 | FABP3                      | fatty acid binding protein 3, muscle and heart                                     |
| 1,10 | SCGB1A1                    | secretoglobin, family 1A, member 1 (uteroglobin)                                   |
| 1,10 | LRRN1                      | leucine rich repeat neuronal 1                                                     |
| 1,10 | PYROXD2;<br>MIR1287        | pyridine nucleotide-disulphide oxidoreductase domain 2; microRNA 1287              |
| 1,10 | C1QL3                      | complement component 1, q subcomponent-like 3                                      |
| 1,10 | TTC9C                      | tetratricopeptide repeat domain 9C                                                 |
| 1,10 | ADAM28                     | Memczak2013 ANTISENSE, coding, INTERNAL, intronic best transcript NM_014265        |
| 1,10 | MEOX2                      | mesenchyme homeobox 2                                                              |
| 1,10 | RAI2                       | retinoic acid induced 2                                                            |
| 1,10 | RASD2                      | RASD family, member 2                                                              |
| 1,10 | ALG8                       | ALG8, alpha-1,3-glucosyltransferase                                                |
| 1,10 | ZFP2                       | ZFP2 zinc finger protein                                                           |
| 1,10 | PRM3                       | protamine 3                                                                        |

|      |                                                  |                                                                                                                                                                                        |
|------|--------------------------------------------------|----------------------------------------------------------------------------------------------------------------------------------------------------------------------------------------|
| 1,10 | KU-MEL-3; RP4-529N6.1                            | uncharacterized LOC497048; uncharacterized LOC497048 [Source:EntrezGene;Acc:497048]; putative novel transcript                                                                         |
| 1,10 | RBM22                                            | RNA binding motif protein 22                                                                                                                                                           |
| 1,10 | HIP1                                             | huntingtin interacting protein 1                                                                                                                                                       |
| 1,10 | ST6GAL2                                          | Transcript Identified by AceView, Entrez Gene ID(s) 84620                                                                                                                              |
| 1,10 | TEX22                                            | testis expressed 22                                                                                                                                                                    |
| 1,10 | ZNF480                                           | zinc finger protein 480                                                                                                                                                                |
| 1,10 | TAPBPL                                           | TAP binding protein-like                                                                                                                                                               |
| 1,10 | ZSCAN10                                          | zinc finger and SCAN domain containing 10                                                                                                                                              |
| 1,10 | RHBDD2                                           | rhomboid domain containing 2                                                                                                                                                           |
| 1,10 | ZNF677                                           | zinc finger protein 677                                                                                                                                                                |
| 1,10 | SEMA3A                                           | sema domain, immunoglobulin domain (Ig), short basic domain, secreted, (semaphorin) 3A                                                                                                 |
| 1,10 | ENTHD2                                           | ENTH domain containing 2                                                                                                                                                               |
| 1,10 | TCP10                                            | t-complex 10                                                                                                                                                                           |
| 1,10 | DPAGT1                                           | dolichyl-phosphate (UDP-N-acetylglucosamine) N-acetylglucosaminephosphotransferase 1 (GlcNAc-1-P transferase)                                                                          |
| 1,10 | SLC38A9                                          | solute carrier family 38, member 9                                                                                                                                                     |
| 1,10 | MCHR2                                            | melanin-concentrating hormone receptor 2                                                                                                                                               |
| 1,10 | HAAO                                             | 3-hydroxyanthranilate 3,4-dioxygenase                                                                                                                                                  |
| 1,10 | HEPHL1                                           | hephaestin-like 1                                                                                                                                                                      |
| 1,10 | CEP128                                           | centrosomal protein 128kDa                                                                                                                                                             |
| 1,10 | RAB11FIP1                                        | RAB11 family interacting protein 1 (class I)                                                                                                                                           |
| 1,10 | A2BP1                                            | Transcript Identified by AceView, Entrez Gene ID(s) 54715                                                                                                                              |
| 1,10 | ZNF625                                           | zinc finger protein 625                                                                                                                                                                |
| 1,10 | SF3B1                                            | Memczak2013 ANTISENSE, CDS, coding, INTERNAL best transcript NM_012433                                                                                                                 |
| 1,10 | RORA                                             | Jeck2013 ALT_ACCEPTOR, ALT_DONOR, coding, INTERNAL, intronic best transcript NM_134261                                                                                                 |
| 1,10 | RBM4B                                            | RNA binding motif protein 4B                                                                                                                                                           |
| 1,10 | LGALS7B                                          | lectin, galactoside-binding, soluble, 7B                                                                                                                                               |
| 1,10 | LOC388692; FAM231D; RP11-403I13.7; RP11-403I13.8 | Homo sapiens uncharacterized LOC388692 (LOC388692), long non-coding RNA.; Homo sapiens family with sequence similarity 231, member D (FAM231D), long non-coding RNA.; novel transcript |
| 1,10 | ARL14                                            | ADP-ribosylation factor like GTPase 14                                                                                                                                                 |
| 1,10 | NDUFA6                                           | NADH dehydrogenase (ubiquinone) 1 alpha subcomplex, 6, 14kDa                                                                                                                           |
| 1,10 | SYT13                                            | synaptotagmin XIII                                                                                                                                                                     |
| 1,10 | ARL13A                                           | ADP-ribosylation factor like GTPase 13A                                                                                                                                                |
| 1,10 | ARHGEF16                                         | Rho guanine nucleotide exchange factor 16                                                                                                                                              |
| 1,10 | SYT14                                            | synaptotagmin XIV                                                                                                                                                                      |
| 1,10 | CACNB2                                           | calcium channel, voltage-dependent, beta 2 subunit                                                                                                                                     |
| 1,10 | TBC1D22A-AS1                                     | TBC1D22A antisense RNA 1                                                                                                                                                               |
| 1,10 | ECSCR                                            | endothelial cell surface expressed chemotaxis and apoptosis regulator                                                                                                                  |

|      |                  |                                                                                                   |
|------|------------------|---------------------------------------------------------------------------------------------------|
| 1,10 | PGRMC1           | Memczak2013 ALT_ACCEPTOR, ALT_DONOR, coding, INTERNAL, intronic best transcript NM_006667         |
| 1,10 | ANXA10           | annexin A10                                                                                       |
| 1,10 | WFDC10B          | WAP four-disulfide core domain 10B                                                                |
| 1,10 | SLC4A4           | solute carrier family 4 (sodium bicarbonate cotransporter), member 4                              |
| 1,10 | CCDC185          | coiled-coil domain containing 185                                                                 |
| 1,10 | CLCN7            | chloride channel, voltage-sensitive 7                                                             |
| 1,10 | C5orf30          | chromosome 5 open reading frame 30                                                                |
| 1,10 | CEBPZOS          | CEBPZ opposite strand                                                                             |
| 1,10 | BPIFB2           | BPI fold containing family B, member 2                                                            |
| 1,10 | C9orf131         | chromosome 9 open reading frame 131                                                               |
| 1,10 | TRAF6            | TNF receptor-associated factor 6, E3 ubiquitin protein ligase                                     |
| 1,10 | CCDC138          | coiled-coil domain containing 138                                                                 |
| 1,10 | TMEM132E         | transmembrane protein 132E                                                                        |
| 1,10 | FAM161B          | family with sequence similarity 161, member B                                                     |
| 1,10 | KCNJ9            | potassium channel, inwardly rectifying subfamily J, member 9                                      |
| 1,10 | UNC5CL           | unc-5 family C-terminal like                                                                      |
| 1,10 | GABPB1           | GA binding protein transcription factor, beta subunit 1                                           |
| 1,10 | TBC1D3P5         | TBC1 domain family, member 3 pseudogene 5                                                         |
| 1,10 | LARP1B           | La ribonucleoprotein domain family, member 1B                                                     |
| 1,10 | CMTM6            | CKLF-like MARVEL transmembrane domain containing 6                                                |
| 1,10 | GRB14            | growth factor receptor bound protein 14                                                           |
| 1,10 | LINC00602        | long intergenic non-protein coding RNA 602                                                        |
| 1,10 | CROCC            | ciliary rootlet coiled-coil, rootletin                                                            |
| 1,10 | IL1RAP           | interleukin 1 receptor accessory protein                                                          |
| 1,10 | LIPT2            | lipoyl(octanoyl) transferase 2 (putative)                                                         |
| 1,10 | BRSK2            | BR serine/threonine kinase 2                                                                      |
| 1,10 | CCDC178          | coiled-coil domain containing 178                                                                 |
| 1,10 | RAPGEF4          | Rap guanine nucleotide exchange factor 4                                                          |
| 1,10 | ELOVL2           | ELOVL fatty acid elongase 2                                                                       |
| 1,10 | TMEM130          | transmembrane protein 130                                                                         |
| 1,10 | NOL9             | nucleolar protein 9                                                                               |
| 1,10 | TMEM2            | Transcript Identified by AceView, Entrez Gene ID(s) 23670                                         |
| 1,10 | PLAGL1;<br>HYMAI | pleiomorphic adenoma gene-like 1; hydatidiform mole associated and imprinted (non-protein coding) |
| 1,10 | MEGF11           | multiple EGF-like-domains 11                                                                      |
| 1,10 | TYW3             | tRNA-yW synthesizing protein 3 homolog (S. cerevisiae)                                            |
| 1,10 | CACNA1H          | calcium channel, voltage-dependent, T type, alpha 1H subunit                                      |
| 1,10 | PIP4K2B          | phosphatidylinositol-5-phosphate 4-kinase, type II, beta                                          |
| 1,10 | AGPAT2           | 1-acylglycerol-3-phosphate O-acyltransferase 2                                                    |

|      |                      |                                                                                         |
|------|----------------------|-----------------------------------------------------------------------------------------|
| 1,10 | DNAJC11              | Zhang2013 ALT_ACCEPTOR, ALT_DONOR, coding, INTERNAL, intronic best transcript NM_018198 |
| 1,10 | GMNC                 | geminin coiled-coil domain containing                                                   |
| 1,10 | MAGEA4               | MAGE family member A4                                                                   |
| 1,10 | OR2C3;<br>GCSAML-AS1 | olfactory receptor, family 2, subfamily C, member 3;<br>GCSAML antisense RNA 1          |
| 1,10 | OR4A15               | olfactory receptor, family 4, subfamily A, member 15                                    |
| 1,10 | SERPINB9             | serpin peptidase inhibitor, clade B (ovalbumin), member 9                               |
| 1,10 | LCP1                 | lymphocyte cytosolic protein 1 (L-plastin)                                              |
| 1,10 | IPPK                 | inositol 1,3,4,5,6-pentakisphosphate 2-kinase                                           |
| 1,10 | XPR1                 | xenotropic and polytropic retrovirus receptor 1                                         |
| 1,10 | PLAC1                | placenta specific 1                                                                     |
| 1,10 | SLC51A               | solute carrier family 51, alpha subunit                                                 |
| 1,10 | FANCD2OS             | FANCD2 opposite strand                                                                  |
| 1,10 | FREM1                | FRAS1 related extracellular matrix 1                                                    |
| 1,10 | SLC35B1              | solute carrier family 35, member B1                                                     |
| 1,10 | ITGA6                | integrin alpha 6                                                                        |
| 1,10 | PLD6                 | phospholipase D family, member 6                                                        |
| 1,10 | ACAD10               | acyl-CoA dehydrogenase family, member 10                                                |
| 1,10 | COL13A1              | collagen, type XIII, alpha 1                                                            |
| 1,10 | KIAA1210             | KIAA1210                                                                                |
| 1,10 | CYTIP                | cytohesin 1 interacting protein                                                         |
| 1,10 | NUP93                | nucleoporin 93kDa                                                                       |
| 1,10 | NFRKB                | nuclear factor related to kappaB binding protein                                        |
| 1,10 | LSM7                 | LSM7 homolog, U6 small nuclear RNA and mRNA degradation associated                      |
| 1,10 | CFAP65               | cilia and flagella associated protein 65                                                |
| 1,10 | LMF2                 | lipase maturation factor 2                                                              |
| 1,10 | CYP2A13              | cytochrome P450, family 2, subfamily A, polypeptide 13                                  |
| 1,10 | ZNF683               | zinc finger protein 683                                                                 |
| 1,10 | HYAL4                | hyaluronoglucosaminidase 4                                                              |
| 1,10 | DLC1                 | DLC1 Rho GTPase activating protein                                                      |
| 1,10 | CNTN5                | contactin 5                                                                             |
| 1,10 | ECH1                 | enoyl-CoA hydratase 1, peroxisomal                                                      |
| 1,10 | NRARP                | NOTCH-regulated ankyrin repeat protein                                                  |
| 1,10 | HIC2                 | hypermethylated in cancer 2                                                             |
| 1,10 | SLC27A1              | solute carrier family 27 (fatty acid transporter), member 1                             |
| 1,10 | TMEM260              | transmembrane protein 260                                                               |
| 1,10 | RIN2                 | Ras and Rab interactor 2                                                                |
| 1,10 | C2orf49              | chromosome 2 open reading frame 49                                                      |
| 1,10 | ENDOU                | endonuclease, polyU-specific                                                            |
| 1,10 | D2HGDH               | D-2-hydroxyglutarate dehydrogenase                                                      |
| 1,10 | TSSC1                | tumor suppressing subtransferable candidate 1                                           |
| 1,10 | TMEM104              | transmembrane protein 104                                                               |
| 1,10 | CLECL1               | C-type lectin-like 1                                                                    |
| 1,10 | GPAT2                | glycerol-3-phosphate acyltransferase 2, mitochondrial                                   |

|      |               |                                                                                         |
|------|---------------|-----------------------------------------------------------------------------------------|
| 1,10 | PLB1          | phospholipase B1                                                                        |
| 1,10 | ECM1          | extracellular matrix protein 1                                                          |
| 1,10 | TRPV1         | transient receptor potential cation channel, subfamily V, member 1                      |
| 1,10 | LIM2          | lens intrinsic membrane protein 2                                                       |
| 1,10 | GSR           | glutathione reductase                                                                   |
| 1,10 | OR2T12        | olfactory receptor, family 2, subfamily T, member 12                                    |
| 1,10 | RABEP2        | rabaptin, RAB GTPase binding effector protein 2                                         |
| 1,10 | ST6GAL1       | ST6 beta-galactosamide alpha-2,6-sialyltransferase 1                                    |
| 1,10 | OR13A1        | olfactory receptor, family 13, subfamily A, member 1                                    |
| 1,10 | C9orf116      | chromosome 9 open reading frame 116                                                     |
| 1,10 | GNG3          | guanine nucleotide binding protein (G protein), gamma 3                                 |
| 1,10 | SETSIP        | SET-like protein                                                                        |
| 1,10 | ATG16L1       | autophagy related 16-like 1                                                             |
| 1,10 | NTF3          | neurotrophin 3                                                                          |
| 1,10 | C17orf98      | chromosome 17 open reading frame 98                                                     |
| 1,10 | SSX6          | synovial sarcoma, X breakpoint 6 (pseudogene)                                           |
| 1,10 | STKLD1        | serine/threonine kinase-like domain containing 1<br>[Source:HGNC Symbol;Acc:HGNC:28669] |
| 1,10 | TTC36         | tetratricopeptide repeat domain 36                                                      |
| 1,10 | FOLH1B        | folate hydrolase 1B                                                                     |
| 1,10 | ZNF366        | zinc finger protein 366                                                                 |
| 1,10 | ICA1L         | islet cell autoantigen 1 like                                                           |
| 1,10 | SFRP4         | secreted frizzled-related protein 4                                                     |
| 1,10 | CECR1         | cat eye syndrome chromosome region, candidate 1                                         |
| 1,10 | DGCR14        | DiGeorge syndrome critical region gene 14                                               |
| 1,10 | XRRA1         | X-ray radiation resistance associated 1                                                 |
| 1,10 | FAM72C        | family with sequence similarity 72, member C                                            |
| 1,10 | FERMT3        | fermitin family member 3                                                                |
| 1,10 | RGS5          | regulator of G-protein signaling 5                                                      |
| 1,10 | MTRNR2L1      | MT-RNR2-like 1                                                                          |
| 1,10 | FAM208B       | family with sequence similarity 208, member B                                           |
| 1,10 | HES2          | hes family bHLH transcription factor 2                                                  |
| 1,10 | SHE           | Src homology 2 domain containing E                                                      |
| 1,10 | TBX18         | T-box 18                                                                                |
| 1,10 | POU6F2        | POU class 6 homeobox 2                                                                  |
| 1,10 | H2AFY2        | H2A histone family, member Y2                                                           |
| 1,10 | RXRA; MIR4669 | retinoid X receptor alpha; microRNA 4669                                                |
| 1,10 | ZNF718        | zinc finger protein 718                                                                 |
| 1,10 | RHBDF2        | rhomboid 5 homolog 2 (Drosophila)                                                       |
| 1,10 | KDM5C         | Transcript Identified by AceView, Entrez Gene ID(s)<br>8242                             |
| 1,10 | ZNF561        | zinc finger protein 561                                                                 |
| 1,10 | APIP          | APAF1 interacting protein                                                               |
| 1,10 | ROPN1L        | rophilin associated tail protein 1-like                                                 |
| 1,10 | SLC35G6       | solute carrier family 35, member G6                                                     |
| 1,10 | NKAP          | NFkB activating protein                                                                 |
| 1,10 | S1PR5         | sphingosine-1-phosphate receptor 5                                                      |
| 1,10 | ARHGAP24      | Rho GTPase activating protein 24                                                        |

|      |                                    |                                                                                                                                                                                                                                                                                                                                                                                                                                                                                                                                  |
|------|------------------------------------|----------------------------------------------------------------------------------------------------------------------------------------------------------------------------------------------------------------------------------------------------------------------------------------------------------------------------------------------------------------------------------------------------------------------------------------------------------------------------------------------------------------------------------|
| 1,10 | CYP3A7;<br>CYP3A7-<br>CYP3A51P     | cytochrome P450, family 3, subfamily A, polypeptide 7; CYP3A7-CYP3A51P readthrough                                                                                                                                                                                                                                                                                                                                                                                                                                               |
| 1,10 | CLDN24                             | claudin 24                                                                                                                                                                                                                                                                                                                                                                                                                                                                                                                       |
| 1,10 | ELAC1                              | elaC ribonuclease Z 1                                                                                                                                                                                                                                                                                                                                                                                                                                                                                                            |
| 1,10 | LOC81691;<br>AC004381.6;<br>U4atac | exonuclease NEF-sp; Putative RNA exonuclease NEF-sp [Source:UniProtKB/Swiss-Prot;Acc:Q96IC2]; Salzman2013 ANNOTATED, CDS, coding, OVCODE, OVERLAPTX, OVEXON, UTR3, UTR5 best transcript NM_001199053; Salzman2013 ANNOTATED, CDS, coding, INTERNAL, OVCODE, OVERLAPTX, OVEXON best transcript NM_001199053; Salzman2013 ANNOTATED, CDS, coding, OVCODE, OVERLAPTX, OVEXON, UTR3 best transcript NM_001199053; Transcript Identified by AceView, Entrez Gene ID(s) 81691; U4atac minor spliceosomal RNA [Source:RFAM;Acc:RF00618] |
| 1,10 | FAM133B                            | family with sequence similarity 133, member B                                                                                                                                                                                                                                                                                                                                                                                                                                                                                    |
| 1,10 | FOXRED1                            | FAD-dependent oxidoreductase domain containing 1                                                                                                                                                                                                                                                                                                                                                                                                                                                                                 |
| 1,10 | ZNF433                             | zinc finger protein 433                                                                                                                                                                                                                                                                                                                                                                                                                                                                                                          |
| 1,10 | L3HYPDH                            | L-3-hydroxyproline dehydratase (trans-)                                                                                                                                                                                                                                                                                                                                                                                                                                                                                          |
| 1,10 | RGS9                               | regulator of G-protein signaling 9                                                                                                                                                                                                                                                                                                                                                                                                                                                                                               |
| 1,10 | TMEM164                            | transmembrane protein 164                                                                                                                                                                                                                                                                                                                                                                                                                                                                                                        |
| 1,10 | ZFP36L1                            | ZFP36 ring finger protein-like 1                                                                                                                                                                                                                                                                                                                                                                                                                                                                                                 |
| 1,10 | CNGB1                              | cyclic nucleotide gated channel beta 1                                                                                                                                                                                                                                                                                                                                                                                                                                                                                           |
| 1,10 | FZD5                               | frizzled class receptor 5                                                                                                                                                                                                                                                                                                                                                                                                                                                                                                        |
| 1,10 | DNASE1                             | deoxyribonuclease I                                                                                                                                                                                                                                                                                                                                                                                                                                                                                                              |
| 1,10 | TREML4                             | triggering receptor expressed on myeloid cells-like 4                                                                                                                                                                                                                                                                                                                                                                                                                                                                            |
| 1,10 | MAGEL2                             | MAGE family member L2                                                                                                                                                                                                                                                                                                                                                                                                                                                                                                            |
| 1,10 | NLRP9                              | NLR family, pyrin domain containing 9                                                                                                                                                                                                                                                                                                                                                                                                                                                                                            |
| 1,10 | TTLL12                             | tubulin tyrosine ligase-like family member 12                                                                                                                                                                                                                                                                                                                                                                                                                                                                                    |
| 1,10 | RIT2                               | Ras-like without CAAX 2                                                                                                                                                                                                                                                                                                                                                                                                                                                                                                          |
| 1,10 | PKN3                               | protein kinase N3                                                                                                                                                                                                                                                                                                                                                                                                                                                                                                                |
| 1,10 | RBM20                              | RNA binding motif protein 20                                                                                                                                                                                                                                                                                                                                                                                                                                                                                                     |
| 1,10 | INPP5A                             | inositol polyphosphate-5-phosphatase A                                                                                                                                                                                                                                                                                                                                                                                                                                                                                           |
| 1,10 | EPS8                               | epidermal growth factor receptor pathway substrate 8                                                                                                                                                                                                                                                                                                                                                                                                                                                                             |
| 1,10 | ACOT12                             | acyl-CoA thioesterase 12                                                                                                                                                                                                                                                                                                                                                                                                                                                                                                         |
| 1,10 | PRSS1                              | protease, serine, 1 (trypsin 1)                                                                                                                                                                                                                                                                                                                                                                                                                                                                                                  |
| 1,10 | AQP6                               | aquaporin 6, kidney specific                                                                                                                                                                                                                                                                                                                                                                                                                                                                                                     |
| 1,10 | RNPEP                              | arginyl aminopeptidase (aminopeptidase B)                                                                                                                                                                                                                                                                                                                                                                                                                                                                                        |
| 1,10 | PTCD3                              | pentatricopeptide repeat domain 3                                                                                                                                                                                                                                                                                                                                                                                                                                                                                                |
| 1,10 | RP11-12M5.1;<br>FAM163A            | Transcript Identified by AceView, Entrez Gene ID(s) 148753; novel transcript                                                                                                                                                                                                                                                                                                                                                                                                                                                     |
| 1,10 | ANXA7                              | annexin A7                                                                                                                                                                                                                                                                                                                                                                                                                                                                                                                       |
| 1,10 | LRRC32                             | leucine rich repeat containing 32                                                                                                                                                                                                                                                                                                                                                                                                                                                                                                |
| 1,10 | ZNF189                             | zinc finger protein 189                                                                                                                                                                                                                                                                                                                                                                                                                                                                                                          |
| 1,10 | OR8J2                              | olfactory receptor, family 8, subfamily J, member 2 (gene/pseudogene)                                                                                                                                                                                                                                                                                                                                                                                                                                                            |
| 1,10 | HYOU1                              | hypoxia up-regulated 1                                                                                                                                                                                                                                                                                                                                                                                                                                                                                                           |
| 1,10 | PRDM4                              | PR domain containing 4                                                                                                                                                                                                                                                                                                                                                                                                                                                                                                           |

|      |                                         |                                                                                                                                    |
|------|-----------------------------------------|------------------------------------------------------------------------------------------------------------------------------------|
| 1,10 | ZFP36                                   | ZFP36 ring finger protein                                                                                                          |
| 1,10 | RCN3                                    | reticulocalbin 3, EF-hand calcium binding domain                                                                                   |
| 1,10 | IL18                                    | interleukin 18                                                                                                                     |
| 1,10 | FAM27E3                                 | family with sequence similarity 27, member E3                                                                                      |
| 1,10 | HABP4                                   | hyaluronan binding protein 4                                                                                                       |
| 1,10 | AARS2                                   | alanyl-tRNA synthetase 2, mitochondrial                                                                                            |
| 1,10 | SCN3A                                   | sodium channel, voltage gated, type III alpha subunit                                                                              |
| 1,10 | FGF7                                    | fibroblast growth factor 7                                                                                                         |
| 1,10 | NUCB1                                   | Memczak2013 ANTISENSE, CDS, coding, INTERNAL best transcript NM_006184                                                             |
| 1,10 | CHRN3                                   | cholinergic receptor, nicotinic beta 3                                                                                             |
| 1,10 | DMRT1                                   | doublesex and mab-3 related transcription factor 1                                                                                 |
| 1,10 | DLGAP1                                  | Transcript Identified by AceView, Entrez Gene ID(s) 9229                                                                           |
| 1,10 | MYC                                     | v-myc avian myelocytomatosis viral oncogene homolog                                                                                |
| 1,10 | CTAGE1                                  | cutaneous T-cell lymphoma-associated antigen 1                                                                                     |
| 1,10 | PILRA                                   | paired immunoglobulin-like type 2 receptor alpha                                                                                   |
| 1,10 | XKR9                                    | X-linked Kx blood group related 9                                                                                                  |
| 1,10 | SLC26A10                                | solute carrier family 26, member 10                                                                                                |
| 1,10 | PLGLB2                                  | plasminogen-like B2                                                                                                                |
| 1,10 | NOBOX                                   | NOBOX oogenesis homeobox                                                                                                           |
| 1,10 | LYPD6                                   | LY6/PLAUR domain containing 6                                                                                                      |
| 1,10 | KRT7                                    | keratin 7, type II                                                                                                                 |
| 1,10 | CDHR3                                   | cadherin-related family member 3                                                                                                   |
| 1,10 | PNISR                                   | PNN-interacting serine/arginine-rich protein                                                                                       |
| 1,10 | TMEFF1                                  | transmembrane protein with EGF-like and two follistatin-like domains 1                                                             |
| 1,10 | PRAMEF7;<br>PRAMEF8                     | PRAME family member 7; PRAME family member 8                                                                                       |
| 1,10 | EML6                                    | echinoderm microtubule associated protein like 6                                                                                   |
| 1,10 | ANK3                                    | Transcript Identified by AceView, Entrez Gene ID(s) 288                                                                            |
| 1,10 | C2                                      | complement component 2                                                                                                             |
| 1,10 | LOC100506422;<br>RP11-80I3.1;<br>tayamu | putative deoxyuridine 5-triphosphate nucleotidohydrolase-like protein FLJ16323; novel transcript; Transcript Identified by AceView |
| 1,10 | NANP                                    | N-acetylneuraminic acid phosphatase                                                                                                |
| 1,10 | OR9K2                                   | olfactory receptor, family 9, subfamily K, member 2                                                                                |
| 1,10 | BBS5                                    | Bardet-Biedl syndrome 5                                                                                                            |
| 1,10 | C8orf46                                 | chromosome 8 open reading frame 46                                                                                                 |
| 1,10 | IL20RA                                  | interleukin 20 receptor, alpha                                                                                                     |
| 1,10 | TUFT1                                   | tuftelin 1                                                                                                                         |
| 1,10 | KLHL10                                  | kelch-like family member 10                                                                                                        |
| 1,10 | LMO2                                    | LIM domain only 2 (rhombotin-like 1)                                                                                               |
| 1,10 | AMER1                                   | APC membrane recruitment protein 1                                                                                                 |
| 1,10 | ABCC9                                   | ATP binding cassette subfamily C member 9                                                                                          |
| 1,10 | ADGRF3                                  | adhesion G protein-coupled receptor F3                                                                                             |
| 1,10 | C10orf76                                | chromosome 10 open reading frame 76                                                                                                |

|      |                                             |                                                                                                                                                           |
|------|---------------------------------------------|-----------------------------------------------------------------------------------------------------------------------------------------------------------|
| 1,10 | ATP8A2                                      | ATPase, aminophospholipid transporter, class I, type 8A, member 2                                                                                         |
| 1,10 | PTRH2                                       | peptidyl-tRNA hydrolase 2                                                                                                                                 |
| 1,10 | TNRC6C                                      | trinucleotide repeat containing 6C                                                                                                                        |
| 1,10 | OR3A1                                       | olfactory receptor, family 3, subfamily A, member 1                                                                                                       |
| 1,10 | RNASEK;<br>C17orf49;<br>RNASEK-<br>C17orf49 | ribonuclease, RNase K; chromosome 17 open reading frame 49; RNASEK-C17orf49 readthrough                                                                   |
| 1,10 | FAM168A                                     | family with sequence similarity 168, member A                                                                                                             |
| 1,10 | VPS11                                       | VPS11, CORVET/HOPS core subunit [Source:HGNC Symbol;Acc:HGNC:14583]                                                                                       |
| 1,10 | APOBEC3A                                    | apolipoprotein B mRNA editing enzyme, catalytic polypeptide-like 3A                                                                                       |
| 1,10 | ARL6                                        | ADP-ribosylation factor like GTPase 6                                                                                                                     |
| 1,10 | NDRG1                                       | N-myc downstream regulated 1                                                                                                                              |
| 1,10 | MRPL10                                      | mitochondrial ribosomal protein L10                                                                                                                       |
| 1,10 | TRABD                                       | Transcript Identified by AceView, Entrez Gene ID(s) 80305                                                                                                 |
| 1,10 | ZNF707                                      | zinc finger protein 707                                                                                                                                   |
| 1,10 | SPATA5                                      | Transcript Identified by AceView, Entrez Gene ID(s) 166378                                                                                                |
| 1,10 | ADAMTSL1                                    | ADAMTS like 1                                                                                                                                             |
| 1,10 | KRTAP10-5                                   | keratin associated protein 10-5                                                                                                                           |
| 1,10 | TAZ                                         | tafazzin                                                                                                                                                  |
| 1,10 | OR3A3                                       | olfactory receptor, family 3, subfamily A, member 3                                                                                                       |
| 1,10 | AKR1C1                                      | aldo-keto reductase family 1, member C1                                                                                                                   |
| 1,10 | BDKRB2                                      | bradykinin receptor B2                                                                                                                                    |
| 1,10 | PPP1R18                                     | protein phosphatase 1, regulatory subunit 18                                                                                                              |
| 1,10 | SDCCAG8                                     | serologically defined colon cancer antigen 8                                                                                                              |
| 1,10 | NTRK2                                       | neurotrophic tyrosine kinase, receptor, type 2                                                                                                            |
| 1,10 | NLRC3                                       | NLR family, CARD domain containing 3                                                                                                                      |
| 1,10 | RP11-875O11.1;<br>RHOBTB2                   | Salzman2013 ANTISENSE, CDS, coding, INTERNAL, intronic, OVCODE, OVERLAPTX, OVEXON, UTR3 best transcript NM_015178; novel transcript, antisense to RHOBTB2 |
| 1,10 | EPN3                                        | Transcript Identified by AceView, Entrez Gene ID(s) 55040                                                                                                 |
| 1,10 | PAWR                                        | PRKC, apoptosis, WT1, regulator                                                                                                                           |
| 1,10 | NCOA1                                       | nuclear receptor coactivator 1                                                                                                                            |
| 1,10 | OR1S2                                       | olfactory receptor, family 1, subfamily S, member 2                                                                                                       |
| 1,10 | C7orf33                                     | chromosome 7 open reading frame 33                                                                                                                        |
| 1,10 | XKR6                                        | X-linked Kx blood group related 6                                                                                                                         |
| 1,10 | HES6                                        | hes family bHLH transcription factor 6                                                                                                                    |
| 1,10 | ADAMTS13                                    | ADAM metalloproteinase with thrombospondin type 1 motif 13                                                                                                |
| 1,10 | ACMSD                                       | aminocarboxymuconate semialdehyde decarboxylase                                                                                                           |
| 1,10 | PROSC                                       | proline synthetase co-transcribed homolog (bacterial)                                                                                                     |
| 1,10 | NDRG2;<br>MIR6717                           | NDRG family member 2; microRNA 6717                                                                                                                       |
| 1,10 | CERS2                                       | ceramide synthase 2                                                                                                                                       |

|      |                     |                                                                                                 |
|------|---------------------|-------------------------------------------------------------------------------------------------|
| 1,10 | SLC20A2             | solute carrier family 20 (phosphate transporter), member 2                                      |
| 1,10 | CDC42EP3            | CDC42 effector protein (Rho GTPase binding) 3                                                   |
| 1,10 | PITPNB              | Memczak2013 ANTISENSE, coding, INTERNAL, intronic best transcript NM_012399                     |
| 1,10 | PIK3CB              | Salzman2013 ANNOTATED, CDS, coding, INTERNAL, OVCODE, OVEXON best transcript NM_006219          |
| 1,10 | NPW                 | neuropeptide W                                                                                  |
| 1,10 | SMARCC2             | Memczak2013 ANTISENSE, CDS, coding, INTERNAL best transcript NM_003075                          |
| 1,10 | CMTM3               | CKLF-like MARVEL transmembrane domain containing 3                                              |
| 1,10 | LRRC74A             | leucine rich repeat containing 74A                                                              |
| 1,10 | ZNF185              | zinc finger protein 185 (LIM domain)                                                            |
| 1,10 | ZNF836              | zinc finger protein 836                                                                         |
| 1,10 | ARHGAP11B           | Rho GTPase activating protein 11B                                                               |
| 1,10 | GLRA3               | glycine receptor alpha 3                                                                        |
| 1,10 | ANKRD27             | ankyrin repeat domain 27 (VPS9 domain)                                                          |
| 1,10 | CAPN6               | calpain 6                                                                                       |
| 1,10 | TMEM189-UBE2V1      | TMEM189-UBE2V1 readthrough                                                                      |
| 1,10 | ZNF428              | zinc finger protein 428                                                                         |
| 1,10 | MRPS2               | mitochondrial ribosomal protein S2                                                              |
| 1,10 | TUBA1C              | tubulin, alpha 1c                                                                               |
| 1,10 | LINC00273           | long intergenic non-protein coding RNA 273                                                      |
| 1,10 | NXNL2               | nucleoredoxin-like 2                                                                            |
| 1,10 | RAX                 | retina and anterior neural fold homeobox                                                        |
| 1,10 | PLEKHA6             | Transcript Identified by AceView, Entrez Gene ID(s) 22874                                       |
| 1,10 | C15orf43            | chromosome 15 open reading frame 43                                                             |
| 1,10 | MXRA7               | matrix-remodelling associated 7                                                                 |
| 1,10 | ERVFRD-1            | endogenous retrovirus group FRD, member 1                                                       |
| 1,10 | TAF13               | TAF13 RNA polymerase II, TATA box binding protein (TBP)-associated factor, 18kDa                |
| 1,10 | SLC5A9              | solute carrier family 5 (sodium/sugar cotransporter), member 9                                  |
| 1,10 | FAM189A2            | family with sequence similarity 189, member A2                                                  |
| 1,10 | DNAH8               | dynein, axonemal, heavy chain 8                                                                 |
| 1,10 | PSMD12              | proteasome 26S subunit, non-ATPase 12                                                           |
| 1,10 | HSP90AA1            | heat shock protein 90kDa alpha (cytosolic), class A member 1                                    |
| 1,10 | RGL3                | ral guanine nucleotide dissociation stimulator-like 3                                           |
| 1,10 | DDI1                | DNA-damage inducible 1 homolog 1                                                                |
| 1,10 | IL16                | interleukin 16                                                                                  |
| 1,10 | FAM46B              | family with sequence similarity 46, member B                                                    |
| 1,10 | RNASE12;<br>RNASE11 | ribonuclease, RNase A family, 12 (non-active);<br>ribonuclease, RNase A family, 11 (non-active) |
| 1,10 | FAM83G              | family with sequence similarity 83, member G                                                    |
| 1,10 | L1TD1               | LINE-1 type transposase domain containing 1                                                     |

|      |              |                                                                                             |
|------|--------------|---------------------------------------------------------------------------------------------|
| 1,10 | GIN1         | gypsy retrotransposon integrase 1                                                           |
| 1,10 | WDR20        | WD repeat domain 20                                                                         |
| 1,10 | DPH6         | diphthamine biosynthesis 6                                                                  |
| 1,10 | MX2          | MX dynamin-like GTPase 2                                                                    |
| 1,10 | ASH1L-AS1    | ASH1L antisense RNA 1                                                                       |
| 1,09 | LRRC6        | leucine rich repeat containing 6                                                            |
| 1,09 | ADORA2B      | adenosine A2b receptor                                                                      |
| 1,09 | FAM160A2     | family with sequence similarity 160, member A2                                              |
| 1,09 | EFCAB1       | EF-hand calcium binding domain 1                                                            |
| 1,09 | DHRS4        | dehydrogenase/reductase (SDR family) member 4                                               |
| 1,09 | ZNF816       | zinc finger protein 816                                                                     |
| 1,09 | ERICH6       | glutamate rich 6                                                                            |
| 1,09 | MATN4        | matrilin 4                                                                                  |
| 1,09 | WT1          | Wilms tumor 1                                                                               |
| 1,09 | PRY; PRY2    | PTPN13-like, Y-linked; PTPN13-like, Y-linked 2                                              |
| 1,09 | SMIM2        | small integral membrane protein 2                                                           |
| 1,09 | CNTN4        | contactin 4                                                                                 |
| 1,09 | MBD1         | methyl-CpG binding domain protein 1                                                         |
| 1,09 | COLQ         | collagen-like tail subunit (single strand of homotrimer) of asymmetric acetylcholinesterase |
| 1,09 | SPIN2B       | spindlin family, member 2B                                                                  |
| 1,09 | RAC3         | ras-related C3 botulinum toxin substrate 3 (rho family, small GTP binding protein Rac3)     |
| 1,09 | PRELID3A     | PRELI domain containing 3A                                                                  |
| 1,09 | NIPAL4       | NIPA-like domain containing 4                                                               |
| 1,09 | INHBB        | inhibin beta B                                                                              |
| 1,09 | C5orf28      | chromosome 5 open reading frame 28                                                          |
| 1,09 | MACC1        | metastasis associated in colon cancer 1                                                     |
| 1,09 | GATA3        | GATA binding protein 3                                                                      |
| 1,09 | SLC7A14      | solute carrier family 7, member 14                                                          |
| 1,09 | C8orf74      | chromosome 8 open reading frame 74                                                          |
| 1,09 | RP9          | retinitis pigmentosa 9 (autosomal dominant)                                                 |
| 1,09 | MRPL2        | mitochondrial ribosomal protein L2                                                          |
| 1,09 | DMGDH        | dimethylglycine dehydrogenase                                                               |
| 1,09 | ZNF852       | zinc finger protein 852                                                                     |
| 1,09 | LIPA         | lipase A, lysosomal acid, cholesterol esterase                                              |
| 1,09 | CHRD2        | chordin-like 2                                                                              |
| 1,09 | WRAP53       | WD repeat containing, antisense to TP53                                                     |
| 1,09 | LY9          | lymphocyte antigen 9                                                                        |
| 1,09 | CPA6         | carboxypeptidase A6                                                                         |
| 1,09 | MBD3L3       | methyl-CpG binding domain protein 3-like 3                                                  |
| 1,09 | UCMA         | upper zone of growth plate and cartilage matrix associated                                  |
| 1,09 | WFDC3        | WAP four-disulfide core domain 3                                                            |
| 1,09 | OR2T6        | olfactory receptor, family 2, subfamily T, member 6                                         |
| 1,09 | DIRAS1       | DIRAS family, GTP-binding RAS-like 1                                                        |
| 1,09 | VENTX        | VENT homeobox                                                                               |
| 1,09 | NOX5; SPESP1 | NADPH oxidase, EF-hand calcium binding domain 5; sperm equatorial segment protein 1         |

|      |                     |                                                                                                            |
|------|---------------------|------------------------------------------------------------------------------------------------------------|
| 1,09 | NBPF6; NBPF5P       | neuroblastoma breakpoint family, member 6;<br>neuroblastoma breakpoint family, member 5,<br>pseudogene     |
| 1,09 | CFAP70              | cilia and flagella associated protein 70                                                                   |
| 1,09 | CCDC8               | coiled-coil domain containing 8                                                                            |
| 1,09 | NCAM2               | neural cell adhesion molecule 2                                                                            |
| 1,09 | SETMAR              | SET domain and mariner transposase fusion gene                                                             |
| 1,09 | MFSD13A             | major facilitator superfamily domain containing 13A                                                        |
| 1,09 | PCNXL4              | pecanex-like 4 (Drosophila)                                                                                |
| 1,09 | SLC13A5             | solute carrier family 13 (sodium-dependent citrate<br>transporter), member 5                               |
| 1,09 | LCE4A               | late cornified envelope 4A                                                                                 |
| 1,09 | ELOF1               | ELF1 homolog, elongation factor 1                                                                          |
| 1,09 | SPIB                | Spi-B transcription factor (Spi-1/PU.1 related)                                                            |
| 1,09 | SLC2A6              | solute carrier family 2 (facilitated glucose transporter),<br>member 6 [Source:HGNC Symbol;Acc:HGNC:11011] |
| 1,09 | ZBED3               | zinc finger, BED-type containing 3                                                                         |
| 1,09 | ZNF404              | zinc finger protein 404                                                                                    |
| 1,09 | MYOZ2               | myozenin 2                                                                                                 |
| 1,09 | CTCF                | CCCTC-binding factor (zinc finger protein)-like                                                            |
| 1,09 | SCGB1C2             | secretoglobin, family 1C, member 2                                                                         |
| 1,09 | RPH3AL              | rabphilin 3A-like (without C2 domains)                                                                     |
| 1,09 | TRIB1               | tribbles pseudokinase 1                                                                                    |
| 1,09 | RTCA                | RNA 3-terminal phosphate cyclase                                                                           |
| 1,09 | MT1G                | metallothionein 1G                                                                                         |
| 1,09 | VPS37C              | vacuolar protein sorting 37 homolog C ( <i>S. cerevisiae</i> )                                             |
| 1,09 | SPIRE1              | spire-type actin nucleation factor 1                                                                       |
| 1,09 | CCNI2               | cyclin I family, member 2                                                                                  |
| 1,09 | RSRP1               | arginine/serine-rich protein 1                                                                             |
| 1,09 | SSBP4               | single stranded DNA binding protein 4                                                                      |
| 1,09 | PPP1R11             | protein phosphatase 1, regulatory (inhibitor) subunit 11                                                   |
| 1,09 | IRF1                | interferon regulatory factor 1                                                                             |
| 1,09 | DRAM2               | DNA-damage regulated autophagy modulator 2                                                                 |
| 1,09 | CPA1                | carboxypeptidase A1 (pancreatic)                                                                           |
| 1,09 | NUP62; IL4I1        | nucleoporin 62kDa; interleukin 4 induced 1                                                                 |
| 1,09 | NUP37               | nucleoporin 37kDa                                                                                          |
| 1,09 | GRIA2               | glutamate receptor, ionotropic, AMPA 2                                                                     |
| 1,09 | AGTR2               | angiotensin II receptor, type 2                                                                            |
| 1,09 | IMPG1               | interphotoreceptor matrix proteoglycan 1                                                                   |
| 1,09 | RBMS3               | RNA binding motif, single stranded interacting protein<br>3                                                |
| 1,09 | TBC1D17;<br>MIR4750 | TBC1 domain family, member 17; microRNA 4750                                                               |
| 1,09 | CCL21               | chemokine (C-C motif) ligand 21                                                                            |
| 1,09 | ZNF101              | zinc finger protein 101                                                                                    |
| 1,09 | SPAG6               | sperm associated antigen 6                                                                                 |
| 1,09 | SH3RF3              | SH3 domain containing ring finger 3                                                                        |
| 1,09 | SSTR5               | somatostatin receptor 5                                                                                    |

|      |                                                              |                                                                                                                                                                                                                                             |
|------|--------------------------------------------------------------|---------------------------------------------------------------------------------------------------------------------------------------------------------------------------------------------------------------------------------------------|
| 1,09 | SH3BGR2                                                      | SH3 domain binding glutamate-rich protein like 2                                                                                                                                                                                            |
| 1,09 | XKRX                                                         | X-linked Kx blood group related, X-linked                                                                                                                                                                                                   |
| 1,09 | ATXN1L                                                       | ataxin 1-like                                                                                                                                                                                                                               |
| 1,09 | HIST1H1T                                                     | histone cluster 1, H1t                                                                                                                                                                                                                      |
| 1,09 | MRPL1                                                        | mitochondrial ribosomal protein L1                                                                                                                                                                                                          |
| 1,09 | FAM3C                                                        | family with sequence similarity 3, member C                                                                                                                                                                                                 |
| 1,09 | MT1H                                                         | metallothionein 1H                                                                                                                                                                                                                          |
| 1,09 | SLCO1B3                                                      | solute carrier organic anion transporter family, member 1B3                                                                                                                                                                                 |
| 1,09 | AC006128.2;<br>AKAP8L                                        | Memczak2013 ANTISENSE, coding, INTERNAL, intronic best transcript NM_014371; TEC                                                                                                                                                            |
| 1,09 | CYCS                                                         | cytochrome c, somatic                                                                                                                                                                                                                       |
| 1,09 | CACNA1F                                                      | calcium channel, voltage-dependent, L type, alpha 1F subunit                                                                                                                                                                                |
| 1,09 | AGAP9;<br>CTGLF11P                                           | Salzman2013 ANNOTATED, CDS, coding, INTERNAL, OVCODE, OVEXON best transcript NM_001190810; centaurin, gamma-like family, member 11 pseudogene [Source:HGNC Symbol;Acc:HGNC:23660]                                                           |
| 1,09 | ZC2HC1C                                                      | zinc finger, C2HC-type containing 1C                                                                                                                                                                                                        |
| 1,09 | ACIN1                                                        | apoptotic chromatin condensation inducer 1                                                                                                                                                                                                  |
| 1,09 | MDP1; NEDD8-MDP1; NEDD8;<br>CHMP4A                           | magnesium-dependent phosphatase 1; NEDD8-MDP1 readthrough; neural precursor cell expressed, developmentally down-regulated 8; charged multivesicular body protein 4A                                                                        |
| 1,09 | BTBD1                                                        | BTB (POZ) domain containing 1                                                                                                                                                                                                               |
| 1,09 | LOC100505478;<br>RP11-402G3.3                                | uncharacterized LOC100505478; putative novel transcript                                                                                                                                                                                     |
| 1,09 | SYNGR4                                                       | synaptogyrin 4                                                                                                                                                                                                                              |
| 1,09 | HARBI1                                                       | harbinger transposase derived 1                                                                                                                                                                                                             |
| 1,09 | KLRG2                                                        | killer cell lectin-like receptor subfamily G, member 2                                                                                                                                                                                      |
| 1,09 | RRP15                                                        | ribosomal RNA processing 15 homolog                                                                                                                                                                                                         |
| 1,09 | FAM222A                                                      | family with sequence similarity 222, member A                                                                                                                                                                                               |
| 1,09 | FAM127B                                                      | family with sequence similarity 127, member B                                                                                                                                                                                               |
| 1,09 | KATNBL1                                                      | katanin p80 subunit B-like 1                                                                                                                                                                                                                |
| 1,09 | IGFBP1                                                       | insulin like growth factor binding protein 1                                                                                                                                                                                                |
| 1,09 | IBA57                                                        | IBA57 homolog, iron-sulfur cluster assembly                                                                                                                                                                                                 |
| 1,09 | KLF3                                                         | Kruppel-like factor 3 (basic)                                                                                                                                                                                                               |
| 1,09 | CHP1                                                         | calcineurin-like EF-hand protein 1                                                                                                                                                                                                          |
| 1,09 | ERMARD                                                       | ER membrane-associated RNA degradation                                                                                                                                                                                                      |
| 1,09 | HLX                                                          | H2.0-like homeobox                                                                                                                                                                                                                          |
| 1,09 | FSD1                                                         | fibronectin type III and SPRY domain containing 1                                                                                                                                                                                           |
| 1,09 | FNBP4                                                        | formin binding protein 4                                                                                                                                                                                                                    |
| 1,09 | SLX1A; SLX1B;<br>SLX1A-SULT1A3;<br>SLX1B-SULT1A4;<br>SULT1A3 | SLX1 homolog A, structure-specific endonuclease subunit; SLX1 homolog B, structure-specific endonuclease subunit; SLX1A-SULT1A3 readthrough (NMD candidate); SLX1B-SULT1A4 readthrough (NMD candidate); sulfotransferase family 1A member 3 |
| 1,09 | SPANXN2                                                      | SPANX family, member N2                                                                                                                                                                                                                     |
| 1,09 | STK4                                                         | serine/threonine kinase 4                                                                                                                                                                                                                   |

|      |                        |                                                                                                        |
|------|------------------------|--------------------------------------------------------------------------------------------------------|
| 1,09 | UBE2S                  | Zhang2013 ALT_ACCEPTOR, ALT_DONOR, coding, INTERNAL, intronic, OVERLAPTX best transcript NM_014501     |
| 1,09 | A2BP1                  | Transcript Identified by AceView, Entrez Gene ID(s) 54715                                              |
| 1,09 | GRAP2                  | GRB2-related adaptor protein 2                                                                         |
| 1,09 | AMY1A;<br>AMY1C        | amylase, alpha 1A (salivary); amylase, alpha 1C (salivary)                                             |
| 1,09 | CCDC97                 | coiled-coil domain containing 97                                                                       |
| 1,09 | TFF1                   | trefoil factor 1                                                                                       |
| 1,09 | KIF1BP                 | KIF1 binding protein                                                                                   |
| 1,09 | RNF152                 | ring finger protein 152                                                                                |
| 1,09 | TAAR6                  | trace amine associated receptor 6                                                                      |
| 1,09 | PLEK2                  | pleckstrin 2                                                                                           |
| 1,09 | SKA1                   | spindle and kinetochore associated complex subunit 1                                                   |
| 1,09 | GDF15                  | growth differentiation factor 15                                                                       |
| 1,09 | KCTD21                 | potassium channel tetramerization domain containing 21                                                 |
| 1,09 | CDC7                   | cell division cycle 7                                                                                  |
| 1,09 | SIRPA                  | signal-regulatory protein alpha                                                                        |
| 1,09 | SYT5                   | synaptotagmin V                                                                                        |
| 1,09 | PDCL2                  | phosducin like 2                                                                                       |
| 1,09 | GTF2F2                 | general transcription factor IIF subunit 2                                                             |
| 1,09 | COPG2; TSGA13          | coatamer protein complex subunit gamma 2; testis specific 13                                           |
| 1,09 | PNPLA5                 | patatin-like phospholipase domain containing 5                                                         |
| 1,09 | SLC25A12               | solute carrier family 25 (aspartate/glutamate carrier), member 12                                      |
| 1,09 | TMEM139                | transmembrane protein 139                                                                              |
| 1,09 | BUB1                   | BUB1 mitotic checkpoint serine/threonine kinase                                                        |
| 1,09 | GNAT2                  | guanine nucleotide binding protein (G protein), alpha transducing activity polypeptide 2               |
| 1,09 | SORBS1                 | sorbin and SH3 domain containing 1                                                                     |
| 1,09 | CILP                   | cartilage intermediate layer protein, nucleotide pyrophosphohydrolase                                  |
| 1,09 | C5orf60                | chromosome 5 open reading frame 60                                                                     |
| 1,09 | TULP2                  | tubby like protein 2                                                                                   |
| 1,09 | B3GALNT1               | beta-1,3-N-acetylgalactosaminyltransferase 1 (globoside blood group)                                   |
| 1,09 | FOXC2                  | forkhead box C2                                                                                        |
| 1,09 | USP9Y; TTTY15          | ubiquitin specific peptidase 9, Y-linked; testis-specific transcript, Y-linked 15 (non-protein coding) |
| 1,09 | KRTAP21-1              | keratin associated protein 21-1                                                                        |
| 1,09 | ZFP28                  | ZFP28 zinc finger protein                                                                              |
| 1,09 | ADAMTS13               | ADAM metalloproteinase with thrombospondin type 1 motif 13                                             |
| 1,09 | HNRNPA1L2              | heterogeneous nuclear ribonucleoprotein A1-like 2                                                      |
| 1,09 | ATP5J2-PTCD1;<br>PTCD1 | ATP5J2-PTCD1 readthrough; pentatricopeptide repeat domain 1                                            |
| 1,09 | IGF2BP3                | insulin-like growth factor 2 mRNA binding protein 3                                                    |
| 1,09 | IQCK                   | IQ motif containing K                                                                                  |

|      |                                         |                                                                                                                                                                      |
|------|-----------------------------------------|----------------------------------------------------------------------------------------------------------------------------------------------------------------------|
| 1,09 | ETHE1                                   | ethylmalonic encephalopathy 1                                                                                                                                        |
| 1,09 | DPH3                                    | diphthamide biosynthesis 3                                                                                                                                           |
| 1,09 | GLDN                                    | gliomedin                                                                                                                                                            |
| 1,09 | TMCO4                                   | transmembrane and coiled-coil domains 4                                                                                                                              |
| 1,09 | DNAJB4                                  | DnaJ (Hsp40) homolog, subfamily B, member 4                                                                                                                          |
| 1,09 | PAGE4                                   | P antigen family, member 4 (prostate associated)                                                                                                                     |
| 1,09 | MCCD1                                   | mitochondrial coiled-coil domain 1                                                                                                                                   |
| 1,09 | CLCN1                                   | chloride channel, voltage-sensitive 1                                                                                                                                |
| 1,09 | CTNS                                    | cystinosis, lysosomal cystine transporter                                                                                                                            |
| 1,09 | DNAJC25                                 | DnaJ (Hsp40) homolog, subfamily C , member 25                                                                                                                        |
| 1,09 | TRIM37                                  | Transcript Identified by AceView, Entrez Gene ID(s)<br>4591                                                                                                          |
| 1,09 | IFITM5                                  | interferon induced transmembrane protein 5                                                                                                                           |
| 1,09 | VNN2                                    | vanin 2                                                                                                                                                              |
| 1,09 | KCNN3                                   | potassium channel, calcium activated<br>intermediate/small conductance subfamily N alpha,<br>member 3                                                                |
| 1,09 | ALX3                                    | ALX homeobox 3                                                                                                                                                       |
| 1,09 | TCEANC                                  | transcription elongation factor A (SII) N-terminal and<br>central domain containing                                                                                  |
| 1,09 | ZFAND2A                                 | zinc finger, AN1-type domain 2A                                                                                                                                      |
| 1,09 | TRAPPC4                                 | trafficking protein particle complex 4                                                                                                                               |
| 1,09 | HTR1D                                   | 5-hydroxytryptamine (serotonin) receptor 1D, G<br>protein-coupled                                                                                                    |
| 1,09 | KCNJ8                                   | potassium channel, inwardly rectifying subfamily J,<br>member 8                                                                                                      |
| 1,09 | OR13F1                                  | olfactory receptor, family 13, subfamily F, member 1                                                                                                                 |
| 1,09 | TPPP                                    | tubulin polymerization promoting protein                                                                                                                             |
| 1,09 | RPEL1                                   | ribulose-5-phosphate-3-epimerase-like 1                                                                                                                              |
| 1,09 | SPANXD                                  | SPANX family, member D                                                                                                                                               |
| 1,09 | ALG13                                   | ALG13, UDP-N-acetylglucosaminyltransferase subunit                                                                                                                   |
| 1,09 | USP50                                   | ubiquitin specific peptidase 50                                                                                                                                      |
| 1,09 | PCSK2                                   | proprotein convertase subtilisin/kexin type 2                                                                                                                        |
| 1,09 | UBE2V1                                  | ubiquitin conjugating enzyme E2 variant 1                                                                                                                            |
| 1,09 | PRAMEF14                                | PRAME family member 14                                                                                                                                               |
| 1,09 | DCST1                                   | DC-STAMP domain containing 1                                                                                                                                         |
| 1,09 | FAM86B2                                 | family with sequence similarity 86, member B2                                                                                                                        |
| 1,09 | HOXB3; HOXB4;<br>MIR10A                 | homeobox B3; homeobox B4; microRNA 10a                                                                                                                               |
| 1,09 | VAV3                                    | vav 3 guanine nucleotide exchange factor                                                                                                                             |
| 1,09 | LOC101927550;<br>AC004893.11;<br>SMURF1 | uncharacterized LOC101927550; Salzman2013<br>ANTISENSE, CDS, coding, INTERNAL, intronic,<br>OVCODE, OVERLAPTX, OVEXON best transcript<br>NM_020429; novel transcript |
| 1,09 | MLN                                     | motilin                                                                                                                                                              |
| 1,09 | TOX2                                    | TOX high mobility group box family member 2                                                                                                                          |

|      |             |                                                                                                                                                                                                                                                                                                                                                      |
|------|-------------|------------------------------------------------------------------------------------------------------------------------------------------------------------------------------------------------------------------------------------------------------------------------------------------------------------------------------------------------------|
| 1,09 | SELM        | selenoprotein M; selenoprotein M<br>[Source:EntrezGene;Acc:140606]; Salzman2013<br>ANNOTATED, CDS, coding, OVCODE,<br>OVERLAPTX, OVEXON, UTR3 best transcript<br>NM_080430; Salzman2013 ANNOTATED, CDS,<br>coding, OVCODE, OVERLAPTX, OVEXON, UTR3,<br>UTR5 best transcript NM_080430; Transcript<br>Identified by AceView, Entrez Gene ID(s) 140606 |
| 1,09 | SLC2A6      | solute carrier family 2 (facilitated glucose transporter),<br>member 6 [Source:HGNC Symbol;Acc:HGNC:11011]                                                                                                                                                                                                                                           |
| 1,09 | TMEM169     | transmembrane protein 169                                                                                                                                                                                                                                                                                                                            |
| 1,09 | LINC00521   | long intergenic non-protein coding RNA 521                                                                                                                                                                                                                                                                                                           |
| 1,09 | UCP1        | uncoupling protein 1 (mitochondrial, proton carrier)                                                                                                                                                                                                                                                                                                 |
| 1,09 | PDE10A      | phosphodiesterase 10A                                                                                                                                                                                                                                                                                                                                |
| 1,09 | SLC9C2      | solute carrier family 9, member C2 (putative)                                                                                                                                                                                                                                                                                                        |
| 1,09 | TRIM64      | tripartite motif containing 64                                                                                                                                                                                                                                                                                                                       |
| 1,09 | ENAM        | enamelin                                                                                                                                                                                                                                                                                                                                             |
| 1,09 | LDAH        | lipid droplet associated hydrolase                                                                                                                                                                                                                                                                                                                   |
| 1,09 | STT3A       | STT3A, subunit of the oligosaccharyltransferase<br>complex (catalytic)                                                                                                                                                                                                                                                                               |
| 1,09 | WDR37       | WD repeat domain 37                                                                                                                                                                                                                                                                                                                                  |
| 1,09 | STRC        | stereocilin                                                                                                                                                                                                                                                                                                                                          |
| 1,09 | KLRC1       | killer cell lectin-like receptor subfamily C, member 1                                                                                                                                                                                                                                                                                               |
| 1,09 | JAKMIP3     | Janus kinase and microtubule interacting protein 3                                                                                                                                                                                                                                                                                                   |
| 1,09 | COX4I2      | cytochrome c oxidase subunit IV isoform 2 (lung)                                                                                                                                                                                                                                                                                                     |
| 1,09 | ADM5; CPT1C | adrenomedullin 5 (putative); carnitine<br>palmitoyltransferase 1C                                                                                                                                                                                                                                                                                    |
| 1,09 | MYO5B       | myosin VB                                                                                                                                                                                                                                                                                                                                            |
| 1,09 | ZCCHC5      | zinc finger, CCHC domain containing 5                                                                                                                                                                                                                                                                                                                |
| 1,09 | C9orf172    | chromosome 9 open reading frame 172                                                                                                                                                                                                                                                                                                                  |
| 1,09 | MTMR8       | myotubularin related protein 8                                                                                                                                                                                                                                                                                                                       |
| 1,09 | TOM1L1      | target of myb1 like 1 membrane trafficking protein                                                                                                                                                                                                                                                                                                   |
| 1,09 | TP53I11     | Memczak2013 ALT_ACCEPTOR, ALT_DONOR,<br>coding, INTERNAL, intronic best transcript<br>NM_001076787                                                                                                                                                                                                                                                   |
| 1,09 | C2orf72     | chromosome 2 open reading frame 72                                                                                                                                                                                                                                                                                                                   |
| 1,09 | ELP6        | elongator acetyltransferase complex subunit 6                                                                                                                                                                                                                                                                                                        |
| 1,09 | C19orf60    | chromosome 19 open reading frame 60                                                                                                                                                                                                                                                                                                                  |
| 1,09 | MIEF2       | mitochondrial elongation factor 2                                                                                                                                                                                                                                                                                                                    |
| 1,09 | GLT1D1      | glycosyltransferase 1 domain containing 1                                                                                                                                                                                                                                                                                                            |
| 1,09 | CSMD1       | CUB and Sushi multiple domains 1                                                                                                                                                                                                                                                                                                                     |
| 1,09 | ZNF692      | zinc finger protein 692                                                                                                                                                                                                                                                                                                                              |
| 1,09 | FMN1        | formin 1                                                                                                                                                                                                                                                                                                                                             |
| 1,09 | MAP7D2      | MAP7 domain containing 2                                                                                                                                                                                                                                                                                                                             |
| 1,09 | PBX1        | pre-B-cell leukemia homeobox 1                                                                                                                                                                                                                                                                                                                       |
| 1,09 | FHIT        | fragile histidine triad                                                                                                                                                                                                                                                                                                                              |
| 1,09 | RAB40C      | RAB40C, member RAS oncogene family                                                                                                                                                                                                                                                                                                                   |
| 1,09 | GFRA3       | GDNF family receptor alpha 3                                                                                                                                                                                                                                                                                                                         |
| 1,09 | LMX1A       | LIM homeobox transcription factor 1, alpha                                                                                                                                                                                                                                                                                                           |

|      |               |                                                                   |
|------|---------------|-------------------------------------------------------------------|
| 1,09 | CHCHD1        | coiled-coil-helix-coiled-coil-helix domain containing 1           |
| 1,09 | ARHGAP1       | Rho GTPase activating protein 1                                   |
| 1,09 | RND2          | Rho family GTPase 2                                               |
| 1,09 | TRMT6         | tRNA methyltransferase 6                                          |
| 1,09 | ZBBX          | zinc finger, B-box domain containing                              |
| 1,09 | GYS2          | glycogen synthase 2 (liver)                                       |
| 1,09 | ZNF385D       | zinc finger protein 385D                                          |
| 1,09 | CLDN4         | claudin 4                                                         |
| 1,09 | COG6          | component of oligomeric golgi complex 6                           |
| 1,09 | ESF1          | ESF1 nucleolar pre-rRNA processing protein homolog                |
| 1,09 | FGF8          | fibroblast growth factor 8 (androgen-induced)                     |
| 1,09 | NELFA; MIR943 | negative elongation factor complex member A;<br>microRNA 943      |
| 1,09 | CCL16         | chemokine (C-C motif) ligand 16                                   |
| 1,09 | ZNRF4         | zinc and ring finger 4                                            |
| 1,09 | NAP1L2        | nucleosome assembly protein 1-like 2                              |
| 1,09 | RASGRP3       | RAS guanyl releasing protein 3 (calcium and DAG-<br>regulated)    |
| 1,09 | CCDC107       | coiled-coil domain containing 107                                 |
| 1,09 | NXPE1         | neurexophilin and PC-esterase domain family, member<br>1          |
| 1,09 | DRD5          | dopamine receptor D5                                              |
| 1,09 | ELOVL6        | ELOVL fatty acid elongase 6                                       |
| 1,09 | TGIF2         | TGFB-induced factor homeobox 2                                    |
| 1,09 | NUDT15        | nudix hydrolase 15                                                |
| 1,09 | TIMM22        | translocase of inner mitochondrial membrane 22<br>homolog (yeast) |
| 1,09 | TUSC5         | tumor suppressor candidate 5                                      |
| 1,09 | OR51I1        | olfactory receptor, family 51, subfamily I, member 1              |
| 1,09 | BZRAP1        | benzodiazepine receptor (peripheral) associated protein<br>1      |
| 1,09 | SC5D          | sterol-C5-desaturase                                              |
| 1,09 | GPC4          | glypican 4                                                        |
| 1,09 | EPM2AIP1      | EPM2A (laforin) interacting protein 1                             |
| 1,09 | PDGFD         | platelet derived growth factor D                                  |
| 1,09 | PIK3R5        | phosphoinositide-3-kinase, regulatory subunit 5                   |
| 1,09 | FAM25C        | family with sequence similarity 25, member C                      |
| 1,09 | GATSL2        | GATS protein-like 2                                               |
| 1,09 | PRAMEF8       | PRAME family member 8                                             |
| 1,09 | SIX2          | SIX homeobox 2                                                    |
| 1,09 | ZNF195        | zinc finger protein 195                                           |
| 1,09 | EBNA1BP2      | EBNA1 binding protein 2                                           |
| 1,09 | HOXA-AS3      | HOXA cluster antisense RNA 3                                      |
| 1,09 | SURF4         | surfeit 4                                                         |
| 1,09 | PRNP          | prion protein                                                     |
| 1,09 | GJD3          | gap junction protein delta 3                                      |
| 1,09 | CYB5R2        | cytochrome b5 reductase 2                                         |
| 1,09 | HPR           | haptoglobin-related protein                                       |

|      |                       |                                                                                                 |
|------|-----------------------|-------------------------------------------------------------------------------------------------|
| 1,09 | PUSL1                 | pseudouridylate synthase-like 1                                                                 |
| 1,09 | CUL5                  | cullin 5                                                                                        |
| 1,09 | OR4M2                 | olfactory receptor, family 4, subfamily M, member 2                                             |
| 1,09 | MAP4                  | Transcript Identified by AceView, Entrez Gene ID(s)<br>4134                                     |
| 1,09 | PRDM7                 | PR domain containing 7                                                                          |
| 1,09 | LCORL                 | ligand dependent nuclear receptor corepressor like                                              |
| 1,09 | KLF4                  | Kruppel-like factor 4 (gut)                                                                     |
| 1,09 | SLC44A2               | solute carrier family 44 (choline transporter), member 2                                        |
| 1,09 | ZNF789                | zinc finger protein 789                                                                         |
| 1,09 | ZNF678                | zinc finger protein 678                                                                         |
| 1,09 | OR1J1                 | olfactory receptor, family 1, subfamily J, member 1                                             |
| 1,09 | SETBP1                | Memczak2013 ALT_ACCEPTOR, ALT_DONOR, coding, INTERNAL, intronic best transcript<br>NM_001130110 |
| 1,09 | NTRK3                 | neurotrophic tyrosine kinase, receptor, type 3                                                  |
| 1,09 | MIR5195; IGHV5-78     | microRNA 5195; immunoglobulin heavy variable 5-78 (pseudogene)                                  |
| 1,09 | RSPO2                 | R-spondin 2                                                                                     |
| 1,09 | PXN                   | paxillin                                                                                        |
| 1,09 | BARX1                 | BARX homeobox 1                                                                                 |
| 1,09 | SMYD3                 | Jeck2013 ALT_ACCEPTOR, ALT_DONOR, coding, INTERNAL, intronic best transcript NM_001167740       |
| 1,09 | FEZ2                  | fasciculation and elongation protein zeta 2 (zygin II)                                          |
| 1,09 | ARRB2                 | arrestin, beta 2                                                                                |
| 1,09 | ADRA1A                | adrenoceptor alpha 1A                                                                           |
| 1,09 | CREBL2                | cAMP responsive element binding protein-like 2                                                  |
| 1,09 | PNLIPRP3              | pancreatic lipase-related protein 3                                                             |
| 1,09 | ETV4                  | ets variant 4                                                                                   |
| 1,09 | UACA                  | uveal autoantigen with coiled-coil domains and ankyrin repeats                                  |
| 1,09 | CDC42SE2              | CDC42 small effector 2                                                                          |
| 1,09 | FAM102A               | Memczak2013 ANTISENSE, CDS, coding, INTERNAL, intronic, UTR3 best transcript<br>NM_203305       |
| 1,09 | C12orf45              | chromosome 12 open reading frame 45                                                             |
| 1,09 | ABI3                  | ABI family, member 3                                                                            |
| 1,09 | FBXO40                | F-box protein 40                                                                                |
| 1,09 | PLA2G2A               | phospholipase A2, group IIA (platelets, synovial fluid)                                         |
| 1,09 | FAM184A               | family with sequence similarity 184, member A                                                   |
| 1,09 | FAM13B                | family with sequence similarity 13, member B                                                    |
| 1,09 | KRT73                 | keratin 73, type II                                                                             |
| 1,09 | GABRE; MIR224; MIR452 | gamma-aminobutyric acid (GABA) A receptor, epsilon; microRNA 224; microRNA 452                  |
| 1,09 | H2AFB2                | H2A histone family, member B2                                                                   |
| 1,09 | RANBP10               | RAN binding protein 10                                                                          |
| 1,09 | CDKAL1                | CDK5 regulatory subunit associated protein 1-like 1                                             |
| 1,09 | GCNT3                 | glucosaminyl (N-acetyl) transferase 3, mucin type                                               |

|      |                  |                                                                                                          |
|------|------------------|----------------------------------------------------------------------------------------------------------|
| 1,09 | HLA-DRB1         | major histocompatibility complex, class II, DR beta 1                                                    |
| 1,09 | TMEM120B         | transmembrane protein 120B                                                                               |
| 1,09 | SLC9A3R2         | solute carrier family 9, subfamily A (NHE3, cation proton antiporter 3), member 3 regulator 2            |
| 1,09 | BSDC1            | BSD domain containing 1                                                                                  |
| 1,09 | NUP214           | nucleoporin 214kDa                                                                                       |
| 1,09 | ZDHHC9           | zinc finger, DHHC-type containing 9                                                                      |
| 1,09 | USP6             | ubiquitin specific peptidase 6                                                                           |
| 1,09 | PUDP             | pseudouridine 5-phosphatase                                                                              |
| 1,09 | PVRL2            | poliovirus receptor-related 2 (herpesvirus entry mediator B)                                             |
| 1,09 | ANKRD1           | ankyrin repeat domain 1 (cardiac muscle)                                                                 |
| 1,09 | DAXX             | death-domain associated protein                                                                          |
| 1,09 | TVP23B           | trans-golgi network vesicle protein 23 homolog B (S. cerevisiae)                                         |
| 1,09 | KRTAP20-3        | keratin associated protein 20-3                                                                          |
| 1,09 | TFG              | TRK-fused gene                                                                                           |
| 1,09 | HECW1            | HECT, C2 and WW domain containing E3 ubiquitin protein ligase 1                                          |
| 1,09 | DGCR2;<br>DGCR11 | DiGeorge syndrome critical region gene 2; DiGeorge syndrome critical region gene 11 (non-protein coding) |
| 1,09 | CCDC116          | coiled-coil domain containing 116                                                                        |
| 1,09 | TMEM17           | transmembrane protein 17                                                                                 |
| 1,09 | TMEM119          | transmembrane protein 119                                                                                |
| 1,09 | PLCL1            | phospholipase C-like 1                                                                                   |
| 1,09 | OR8D1            | olfactory receptor, family 8, subfamily D, member 1                                                      |
| 1,09 | TMEM126A         | transmembrane protein 126A                                                                               |
| 1,09 | C9orf64          | Transcript Identified by AceView, Entrez Gene ID(s) 84267                                                |
| 1,09 | CARD14           | caspase recruitment domain family, member 14                                                             |
| 1,09 | YPEL2            | yippee like 2                                                                                            |
| 1,09 | FAM98B           | family with sequence similarity 98, member B                                                             |
| 1,09 | SLC25A31         | solute carrier family 25 (mitochondrial carrier; adenine nucleotide translocator), member 31             |
| 1,09 | AMER3            | APC membrane recruitment protein 3                                                                       |
| 1,09 | KCTD6            | potassium channel tetramerization domain containing 6                                                    |
| 1,09 | TPTE             | transmembrane phosphatase with tensin homology                                                           |
| 1,09 | HTR2B            | 5-hydroxytryptamine (serotonin) receptor 2B, G protein coupled                                           |
| 1,09 | NDC1             | NDC1 transmembrane nucleoporin                                                                           |
| 1,09 | HIBADH           | Salzman2013 ALT_ACCEPTOR, ALT_DONOR, coding, INTERNAL, intronic best transcript NM_152740                |
| 1,09 | PSMB3            | proteasome subunit beta 3                                                                                |
| 1,09 | NSUN7            | NOP2/Sun domain family, member 7                                                                         |
| 1,09 | KLKB1            | kallikrein B1                                                                                            |
| 1,09 | WFDC6            | WAP four-disulfide core domain 6                                                                         |
| 1,09 | SETD7            | SET domain containing (lysine methyltransferase) 7                                                       |

|      |                            |                                                                                          |
|------|----------------------------|------------------------------------------------------------------------------------------|
| 1,09 | SLC16A1                    | solute carrier family 16 (monocarboxylate transporter), member 1                         |
| 1,09 | ANKRD37                    | ankyrin repeat domain 37                                                                 |
| 1,09 | FAM171A1                   | family with sequence similarity 171, member A1                                           |
| 1,09 | GINM1                      | glycoprotein integral membrane 1                                                         |
| 1,09 | HS3ST4                     | heparan sulfate (glucosamine) 3-O-sulfotransferase 4                                     |
| 1,09 | DMRTA1                     | DMRT-like family A1                                                                      |
| 1,09 | PCDH17                     | protocadherin 17                                                                         |
| 1,09 | ALDH1A3                    | aldehyde dehydrogenase 1 family, member A3                                               |
| 1,09 | SLC6A13                    | solute carrier family 6 (neurotransmitter transporter), member 13                        |
| 1,09 | EML2; MIR330               | echinoderm microtubule associated protein like 2; microRNA 330                           |
| 1,09 | ASB6                       | ankyrin repeat and SOCS box containing 6                                                 |
| 1,09 | SIGLEC12                   | sialic acid binding Ig-like lectin 12 (gene/pseudogene)                                  |
| 1,09 | USP8                       | ubiquitin specific peptidase 8                                                           |
| 1,09 | LAIR2                      | leukocyte-associated immunoglobulin-like receptor 2                                      |
| 1,09 | SMO                        | smoothened, frizzled class receptor                                                      |
| 1,09 | TRIML1                     | tripartite motif family like 1                                                           |
| 1,09 | CALB2                      | calbindin 2                                                                              |
| 1,09 | ZNF219                     | zinc finger protein 219                                                                  |
| 1,09 | NLRP14                     | NLR family, pyrin domain containing 14                                                   |
| 1,09 | CYP11A1                    | cytochrome P450, family 11, subfamily A, polypeptide 1                                   |
| 1,09 | DCAF5                      | DDB1 and CUL4 associated factor 5                                                        |
| 1,09 | PSRC1                      | proline/serine-rich coiled-coil 1                                                        |
| 1,09 | PGAP2                      | post-GPI attachment to proteins 2                                                        |
| 1,09 | HPS4                       | Hermansky-Pudlak syndrome 4                                                              |
| 1,09 | RNLS                       | renalase, FAD-dependent amine oxidase                                                    |
| 1,09 | DUSP5                      | dual specificity phosphatase 5                                                           |
| 1,09 | NXPE3                      | neurexophilin and PC-esterase domain family, member 3                                    |
| 1,09 | APOF                       | apolipoprotein F                                                                         |
| 1,09 | GNGT1                      | guanine nucleotide binding protein (G protein), gamma transducing activity polypeptide 1 |
| 1,09 | TRAPPC1                    | trafficking protein particle complex 1                                                   |
| 1,09 | LOC149950;<br>RP11-410N8.4 | uncharacterized LOC149950; novel transcript                                              |
| 1,09 | TMED8                      | transmembrane p24 trafficking protein family member 8                                    |
| 1,09 | ITPK1                      | inositol-tetrakisphosphate 1-kinase                                                      |
| 1,09 | C10orf53                   | chromosome 10 open reading frame 53                                                      |
| 1,09 | ACP2                       | acid phosphatase 2, lysosomal                                                            |
| 1,09 | GPR137B                    | G protein-coupled receptor 137B                                                          |
| 1,09 | ARHGAP18                   | Rho GTPase activating protein 18                                                         |
| 1,09 | OTUD6A                     | OTU deubiquitinase 6A                                                                    |
| 1,09 | HSDL1                      | hydroxysteroid dehydrogenase like 1                                                      |
| 1,09 | CUL4A                      | cullin 4A                                                                                |
| 1,09 | SCRG1                      | stimulator of chondrogenesis 1                                                           |
| 1,09 | MYOZ3                      | myozenin 3                                                                               |

|      |                                                |                                                                                                                                                   |
|------|------------------------------------------------|---------------------------------------------------------------------------------------------------------------------------------------------------|
| 1,09 | SLC30A8                                        | solute carrier family 30 (zinc transporter), member 8                                                                                             |
| 1,09 | GAD2                                           | glutamate decarboxylase 2                                                                                                                         |
| 1,09 | USP21                                          | ubiquitin specific peptidase 21                                                                                                                   |
| 1,09 | FOXA3                                          | forkhead box A3                                                                                                                                   |
| 1,09 | WASF2                                          | WAS protein family, member 2                                                                                                                      |
| 1,09 | SAMD8                                          | sterile alpha motif domain containing 8                                                                                                           |
| 1,09 | UGT2B15                                        | UDP glucuronosyltransferase 2 family, polypeptide B15                                                                                             |
| 1,09 | C10orf35                                       | chromosome 10 open reading frame 35                                                                                                               |
| 1,09 | RABGGTB;<br>SNORD45B;<br>SNORD45A;<br>SNORD45C | Rab geranylgeranyltransferase, beta subunit; small nucleolar RNA, C/D box 45B; small nucleolar RNA, C/D box 45A; small nucleolar RNA, C/D box 45C |
| 1,09 | PLEKHG4B                                       | pleckstrin homology domain containing, family G (with RhoGef domain) member 4B                                                                    |
| 1,09 | ZNF502                                         | zinc finger protein 502                                                                                                                           |
| 1,09 | ADIPOR1                                        | adiponectin receptor 1                                                                                                                            |
| 1,09 | COTL1                                          | coactosin-like F-actin binding protein 1                                                                                                          |
| 1,09 | ANGPT1                                         | angiopoietin 1                                                                                                                                    |
| 1,09 | PIGG                                           | phosphatidylinositol glycan anchor biosynthesis class G                                                                                           |
| 1,09 | DAZL                                           | deleted in azoospermia-like                                                                                                                       |
| 1,09 | OR5K3                                          | olfactory receptor, family 5, subfamily K, member 3                                                                                               |
| 1,09 | ZNF675                                         | zinc finger protein 675                                                                                                                           |
| 1,09 | ZFP1                                           | ZFP1 zinc finger protein                                                                                                                          |
| 1,09 | CAP1                                           | CAP, adenylate cyclase-associated protein 1 (yeast)                                                                                               |
| 1,09 | ABCB4                                          | ATP binding cassette subfamily B member 4                                                                                                         |
| 1,09 | ZNF197                                         | zinc finger protein 197                                                                                                                           |
| 1,09 | PHF3                                           | PHD finger protein 3                                                                                                                              |
| 1,09 | PBOV1                                          | prostate and breast cancer overexpressed 1                                                                                                        |
| 1,09 | TMEM92                                         | transmembrane protein 92                                                                                                                          |
| 1,09 | KCNN1                                          | potassium channel, calcium activated intermediate/small conductance subfamily N alpha, member 1                                                   |
| 1,09 | PIWIL3                                         | piwi-like RNA-mediated gene silencing 3                                                                                                           |
| 1,09 | ZKSCAN3                                        | zinc finger with KRAB and SCAN domains 3                                                                                                          |
| 1,09 | PPP6C                                          | protein phosphatase 6, catalytic subunit                                                                                                          |
| 1,09 | LYVE1                                          | lymphatic vessel endothelial hyaluronan receptor 1                                                                                                |
| 1,09 | GPBP1L1                                        | GC-rich promoter binding protein 1-like 1                                                                                                         |
| 1,09 | COX10                                          | COX10 heme A:farnesyltransferase cytochrome c oxidase assembly factor                                                                             |
| 1,09 | MYO1B                                          | myosin IB                                                                                                                                         |
| 1,09 | ACTR8                                          | ARP8 actin-related protein 8 homolog (yeast)                                                                                                      |
| 1,09 | ZNF630                                         | zinc finger protein 630                                                                                                                           |
| 1,09 | MPV17L                                         | MPV17 mitochondrial membrane protein-like                                                                                                         |
| 1,09 | GJB1                                           | gap junction protein beta 1                                                                                                                       |
| 1,09 | NUDT22                                         | nudix hydrolase 22                                                                                                                                |
| 1,09 | CFAP58                                         | cilia and flagella associated protein 58                                                                                                          |
| 1,09 | NOG                                            | noggin                                                                                                                                            |
| 1,09 | NT5C2                                          | 5-nucleotidase, cytosolic II                                                                                                                      |

|      |          |                                                                                            |
|------|----------|--------------------------------------------------------------------------------------------|
| 1,09 | IFIT3    | interferon-induced protein with tetratricopeptide repeats 3                                |
| 1,09 | ORC4     | origin recognition complex subunit 4                                                       |
| 1,09 | C6orf47  | chromosome 6 open reading frame 47                                                         |
| 1,09 | ARSK     | arylsulfatase family, member K                                                             |
| 1,09 | AP3B2    | adaptor-related protein complex 3, beta 2 subunit                                          |
| 1,09 | LPAR6    | lysophosphatidic acid receptor 6                                                           |
| 1,09 | FAM43B   | family with sequence similarity 43, member B                                               |
| 1,09 | SFT2D3   | SFT2 domain containing 3                                                                   |
| 1,09 | TMEM87B  | transmembrane protein 87B                                                                  |
| 1,09 | ADAM29   | ADAM metallopeptidase domain 29                                                            |
| 1,09 | CALY     | calcyon neuron-specific vesicular protein                                                  |
| 1,09 | H3F3C    | H3 histone, family 3C                                                                      |
| 1,09 | DCBLD1   | discoidin, CUB and LCCL domain containing 1                                                |
| 1,09 | CLNK     | cytokine-dependent hematopoietic cell linker                                               |
| 1,09 | HEATR9   | HEAT repeat containing 9                                                                   |
| 1,09 | CYS1     | cystin 1                                                                                   |
| 1,09 | JADE2    | jade family PHD finger 2                                                                   |
| 1,09 | RNF31    | ring finger protein 31                                                                     |
| 1,09 | CCNB3    | cyclin B3                                                                                  |
| 1,09 | NAAA     | N-acylethanolamine acid amidase                                                            |
| 1,09 | CEND1    | cell cycle exit and neuronal differentiation 1                                             |
| 1,09 | ATP5G2   | ATP synthase, H <sup>+</sup> transporting, mitochondrial Fo complex subunit C2 (subunit 9) |
| 1,09 | TNIK     | TRAF2 and NCK interacting kinase                                                           |
| 1,09 | MGST1    | microsomal glutathione S-transferase 1                                                     |
| 1,09 | NFKB2    | nuclear factor of kappa light polypeptide gene enhancer in B-cells 2 (p49/p100)            |
| 1,09 | ZNF132   | zinc finger protein 132                                                                    |
| 1,09 | ENOX2    | ecto-NOX disulfide-thiol exchanger 2                                                       |
| 1,09 | EYS      | eyes shut homolog (Drosophila)                                                             |
| 1,09 | TCHH     | trichohyalin                                                                               |
| 1,09 | RALGPS2  | Ral GEF with PH domain and SH3 binding motif 2                                             |
| 1,09 | KEL      | Kell blood group, metallo-endopeptidase                                                    |
| 1,09 | CEACAM21 | carcinoembryonic antigen-related cell adhesion molecule 21                                 |
| 1,09 | CYP11B2  | cytochrome P450, family 11, subfamily B, polypeptide 2                                     |
| 1,09 | LRRN3    | leucine rich repeat neuronal 3                                                             |
| 1,09 | FOLR3    | folate receptor 3 (gamma)                                                                  |
| 1,09 | DCX      | doublecortin                                                                               |
| 1,09 | TRPC5OS  | TRPC5 opposite strand                                                                      |
| 1,09 | PYGM     | phosphorylase, glycogen, muscle                                                            |
| 1,09 | SESTD1   | SEC14 and spectrin domains 1                                                               |
| 1,09 | TADA2A   | transcriptional adaptor 2A                                                                 |
| 1,09 | SLC35F1  | solute carrier family 35, member F1                                                        |
| 1,09 | TOM1L2   | target of myb1 like 2 membrane trafficking protein                                         |
| 1,09 | MURC     | muscle-related coiled-coil protein                                                         |
| 1,09 | MARCO    | macrophage receptor with collagenous structure                                             |
| 1,09 | FOLR2    | folate receptor 2 (fetal)                                                                  |

|      |                          |                                                                                                              |
|------|--------------------------|--------------------------------------------------------------------------------------------------------------|
| 1,09 | IRS4                     | insulin receptor substrate 4                                                                                 |
| 1,09 | TMEM211                  | transmembrane protein 211                                                                                    |
| 1,09 | NUDT10                   | nudix hydrolase 10                                                                                           |
| 1,09 | INPP5D                   | inositol polyphosphate-5-phosphatase D                                                                       |
| 1,09 | TBCK                     | Memczak2013 ALT_ACCEPTOR, ALT_DONOR, coding, INTERNAL, intronic best transcript NM_001163435                 |
| 1,09 | DTWD1                    | DTW domain containing 1                                                                                      |
| 1,09 | SPATA31A6                | SPATA31 subfamily A, member 6                                                                                |
| 1,09 | TCEAL7                   | transcription elongation factor A (SII)-like 7                                                               |
| 1,09 | PKN2                     | protein kinase N2                                                                                            |
| 1,09 | EFHD2                    | EF-hand domain family member D2                                                                              |
| 1,09 | BMS1                     | BMS1 ribosome biogenesis factor                                                                              |
| 1,09 | CLDN19                   | claudin 19                                                                                                   |
| 1,09 | AMPD3                    | adenosine monophosphate deaminase 3                                                                          |
| 1,09 | PLEKHG4                  | pleckstrin homology domain containing, family G (with RhoGef domain) member 4                                |
| 1,09 | TUBB                     | tubulin, beta class I                                                                                        |
| 1,09 | LOC400661;<br>AC034110.1 | uncharacterized LOC400661; novel transcript                                                                  |
| 1,09 | TXNRD3NB;<br>TXNRD3      | thioredoxin reductase 3 neighbor; thioredoxin reductase 3                                                    |
| 1,09 | ALOX15B                  | arachidonate 15-lipoxygenase, type B                                                                         |
| 1,09 | CHRNA3                   | cholinergic receptor, nicotinic gamma                                                                        |
| 1,09 | HDAC9                    | Jeck2013 ALT_ACCEPTOR, ALT_DONOR, coding, INTERNAL, intronic best transcript NM_178423                       |
| 1,09 | TFB1M                    | transcription factor B1, mitochondrial                                                                       |
| 1,09 | PDCD6IP                  | programmed cell death 6 interacting protein                                                                  |
| 1,09 | CDC42EP1                 | CDC42 effector protein (Rho GTPase binding) 1                                                                |
| 1,09 | EXOSC10                  | exosome component 10                                                                                         |
| 1,09 | TMEM98                   | transmembrane protein 98                                                                                     |
| 1,09 | SSPO                     | SCO-spondin                                                                                                  |
| 1,09 | TRPM2                    | transient receptor potential cation channel, subfamily M, member 2                                           |
| 1,09 | ENO1                     | Memczak2013 ANTISENSE, coding, INTERNAL, UTR3 best transcript NM_001428                                      |
| 1,09 | SLC38A6                  | solute carrier family 38, member 6                                                                           |
| 1,09 | DESI1                    | desumoylating isopeptidase 1                                                                                 |
| 1,09 | OR6C74                   | olfactory receptor, family 6, subfamily C, member 74                                                         |
| 1,09 | PRR32                    | proline rich 32                                                                                              |
| 1,09 | ABHD3                    | Transcript Identified by AceView, Entrez Gene ID(s) 171586                                                   |
| 1,09 | USP17L26;<br>USP17L24    | ubiquitin specific peptidase 17-like family member 26; ubiquitin specific peptidase 17-like family member 24 |
| 1,09 | SULT1C3                  | sulfotransferase family 1C member 3                                                                          |
| 1,09 | MT1IP                    | metallothionein 1I, pseudogene                                                                               |
| 1,09 | ZNF502                   | zinc finger protein 502                                                                                      |
| 1,09 | ZNF26                    | zinc finger protein 26                                                                                       |
| 1,09 | SUV39H1                  | suppressor of variegation 3-9 homolog 1 (Drosophila)                                                         |

|      |                                      |                                                                                                                                                                                                                                                                                                                                                                                          |
|------|--------------------------------------|------------------------------------------------------------------------------------------------------------------------------------------------------------------------------------------------------------------------------------------------------------------------------------------------------------------------------------------------------------------------------------------|
| 1,09 | PFKFB3                               | 6-phosphofructo-2-kinase/fructose-2,6-biphosphatase 3                                                                                                                                                                                                                                                                                                                                    |
| 1,08 | POU6F2-AS2;<br>POU6F2;<br>AC011292.2 | POU6F2 antisense RNA 2 [Source:HGNC Symbol;Acc:HGNC:21887]; Salzman2013 ANTISENSE, coding, INTERNAL, intronic, OVERLAPTX best transcript NM_007252; novel transcript, antisense to POU6F2                                                                                                                                                                                                |
| 1,08 | NUDT18                               | nudix hydrolase 18                                                                                                                                                                                                                                                                                                                                                                       |
| 1,08 | SLC38A4                              | solute carrier family 38, member 4                                                                                                                                                                                                                                                                                                                                                       |
| 1,08 | TMEM161A                             | transmembrane protein 161A                                                                                                                                                                                                                                                                                                                                                               |
| 1,08 | RAI1                                 | retinoic acid induced 1                                                                                                                                                                                                                                                                                                                                                                  |
| 1,08 | RNASE10                              | ribonuclease, RNase A family, 10 (non-active)                                                                                                                                                                                                                                                                                                                                            |
| 1,08 | POGZ                                 | Transcript Identified by AceView, Entrez Gene ID(s) 23126                                                                                                                                                                                                                                                                                                                                |
| 1,08 | ATF6B                                | activating transcription factor 6 beta                                                                                                                                                                                                                                                                                                                                                   |
| 1,08 | XRCC2                                | X-ray repair complementing defective repair in Chinese hamster cells 2                                                                                                                                                                                                                                                                                                                   |
| 1,08 | REPS1                                | RALBP1 associated Eps domain containing 1                                                                                                                                                                                                                                                                                                                                                |
| 1,08 | DACH2                                | dachshund family transcription factor 2                                                                                                                                                                                                                                                                                                                                                  |
| 1,08 | CDK12                                | cyclin-dependent kinase 12                                                                                                                                                                                                                                                                                                                                                               |
| 1,08 | CXorf57                              | chromosome X open reading frame 57                                                                                                                                                                                                                                                                                                                                                       |
| 1,08 | HHAT                                 | hedgehog acyltransferase                                                                                                                                                                                                                                                                                                                                                                 |
| 1,08 | PRR15                                | proline rich 15                                                                                                                                                                                                                                                                                                                                                                          |
| 1,08 | LALBA                                | lactalbumin, alpha-                                                                                                                                                                                                                                                                                                                                                                      |
| 1,08 | LILRB5                               | leukocyte immunoglobulin-like receptor, subfamily B (with TM and ITIM domains), member 5                                                                                                                                                                                                                                                                                                 |
| 1,08 | GP5                                  | glycoprotein V (platelet)                                                                                                                                                                                                                                                                                                                                                                |
| 1,08 | VAMP7                                | Transcript Identified by AceView, Entrez Gene ID(s) 6845                                                                                                                                                                                                                                                                                                                                 |
| 1,08 | PNPLA6                               | patatin-like phospholipase domain containing 6                                                                                                                                                                                                                                                                                                                                           |
| 1,08 | C19orf53                             | chromosome 19 open reading frame 53                                                                                                                                                                                                                                                                                                                                                      |
| 1,08 | RPS26                                | Homo sapiens ribosomal protein S26, mRNA (cDNA clone MGC:27148 IMAGE:4807004), complete cds.; Homo sapiens ribosomal protein S26, mRNA (cDNA clone MGC:88201 IMAGE:6388128), complete cds.; Homo sapiens ribosomal protein S26, mRNA (cDNA clone MGC:104291 IMAGE:4287636), complete cds.; Homo sapiens ribosomal protein S26, mRNA (cDNA clone MGC:104292 IMAGE:6726218), complete cds. |
| 1,08 | OR11A1                               | olfactory receptor, family 11, subfamily A, member 1                                                                                                                                                                                                                                                                                                                                     |
| 1,08 | ATG13                                | autophagy related 13                                                                                                                                                                                                                                                                                                                                                                     |
| 1,08 | SLC35F6                              | solute carrier family 35, member F6                                                                                                                                                                                                                                                                                                                                                      |
| 1,08 | MYH7                                 | myosin, heavy chain 7, cardiac muscle, beta                                                                                                                                                                                                                                                                                                                                              |
| 1,08 | HACD3                                | 3-hydroxyacyl-CoA dehydratase 3                                                                                                                                                                                                                                                                                                                                                          |
| 1,08 | PLPP3                                | phospholipid phosphatase 3                                                                                                                                                                                                                                                                                                                                                               |
| 1,08 | CXCL16                               | chemokine (C-X-C motif) ligand 16                                                                                                                                                                                                                                                                                                                                                        |
| 1,08 | NCR2                                 | natural cytotoxicity triggering receptor 2                                                                                                                                                                                                                                                                                                                                               |
| 1,08 | ADRM1                                | adhesion regulating molecule 1                                                                                                                                                                                                                                                                                                                                                           |
| 1,08 | TIGD1; MIR5001                       | tigger transposable element derived 1; microRNA 5001                                                                                                                                                                                                                                                                                                                                     |

|      |                        |                                                                                                            |
|------|------------------------|------------------------------------------------------------------------------------------------------------|
| 1,08 | CELF6                  | CUGBP, Elav-like family member 6                                                                           |
| 1,08 | TWIST1                 | twist family bHLH transcription factor 1                                                                   |
| 1,08 | CDK11B                 | cyclin-dependent kinase 11B                                                                                |
| 1,08 | NPHS1                  | nephrosis 1, congenital, Finnish type (nephrin)                                                            |
| 1,08 | KRT1                   | keratin 1, type II                                                                                         |
| 1,08 | RPL3L                  | ribosomal protein L3-like                                                                                  |
| 1,08 | NUDT11                 | nudix hydrolase 11                                                                                         |
| 1,08 | KCNMB3                 | potassium channel subfamily M regulatory beta subunit 3                                                    |
| 1,08 | PNPT1                  | polyribonucleotide nucleotidyltransferase 1                                                                |
| 1,08 | OPN5                   | opsin 5                                                                                                    |
| 1,08 | SPDYE2;<br>SPDYE2B     | speedy/RINGO cell cycle regulator family member E2;<br>speedy/RINGO cell cycle regulator family member E2B |
| 1,08 | SPDYE2B                | speedy/RINGO cell cycle regulator family member E2B                                                        |
| 1,08 | FNDC9                  | fibronectin type III domain containing 9                                                                   |
| 1,08 | TRAT1                  | T cell receptor associated transmembrane adaptor 1                                                         |
| 1,08 | DNAJC5G                | DnaJ (Hsp40) homolog, subfamily C, member 5 gamma                                                          |
| 1,08 | TRIM17                 | tripartite motif containing 17                                                                             |
| 1,08 | FUOM                   | fucose mutarotase                                                                                          |
| 1,08 | GARS                   | glycyl-tRNA synthetase                                                                                     |
| 1,08 | DDX60                  | DEAD (Asp-Glu-Ala-Asp) box polypeptide 60                                                                  |
| 1,08 | RP11-307P5.1;<br>SAMD5 | novel transcript; Transcript Identified by AceView,<br>Entrez Gene ID(s) 389432                            |
| 1,08 | KCNH6                  | potassium channel, voltage gated eag related subfamily H, member 6                                         |
| 1,08 | RRP12                  | ribosomal RNA processing 12 homolog                                                                        |
| 1,08 | FBXO28                 | F-box protein 28                                                                                           |
| 1,08 | IL32                   | interleukin 32                                                                                             |
| 1,08 | ZNF776                 | zinc finger protein 776                                                                                    |
| 1,08 | ZG16                   | zymogen granule protein 16                                                                                 |
| 1,08 | SENP1                  | SUMO1/sentrin specific peptidase 1                                                                         |
| 1,08 | WNT2                   | wingless-type MMTV integration site family member 2                                                        |
| 1,08 | GPR182                 | G protein-coupled receptor 182                                                                             |
| 1,08 | KIF7                   | kinesin family member 7                                                                                    |
| 1,08 | ZNF705E                | zinc finger protein 705E                                                                                   |
| 1,08 | PLA2G6                 | phospholipase A2, group VI (cytosolic, calcium-independent)                                                |
| 1,08 | FAM195A                | family with sequence similarity 195, member A                                                              |
| 1,08 | ZNF121                 | zinc finger protein 121                                                                                    |
| 1,08 | C9orf16                | chromosome 9 open reading frame 16                                                                         |
| 1,08 | CPXM2                  | carboxypeptidase X (M14 family), member 2                                                                  |
| 1,08 | GOLGA6B                | golgin A6 family, member B                                                                                 |
| 1,08 | SGMS1                  | sphingomyelin synthase 1                                                                                   |
| 1,08 | CCDC184                | coiled-coil domain containing 184                                                                          |
| 1,08 | H6PD                   | hexose-6-phosphate dehydrogenase (glucose 1-dehydrogenase)                                                 |

|      |              |                                                                                                 |
|------|--------------|-------------------------------------------------------------------------------------------------|
| 1,08 | GPR22        | G protein-coupled receptor 22                                                                   |
| 1,08 | RGPD2; RGPD1 | RANBP2-like and GRIP domain containing 2;<br>RANBP2-like and GRIP domain containing 1           |
| 1,08 | REG4         | regenerating islet-derived family, member 4                                                     |
| 1,08 | S100Z        | S100 calcium binding protein Z                                                                  |
| 1,08 | SNX5         | sorting nexin 5                                                                                 |
| 1,08 | CHST11       | Transcript Identified by AceView, Entrez Gene ID(s)<br>50515                                    |
| 1,08 | RGS13        | regulator of G-protein signaling 13                                                             |
| 1,08 | ANKRA2       | ankyrin repeat, family A (RFXANK-like), 2                                                       |
| 1,08 | CCDC122      | coiled-coil domain containing 122                                                               |
| 1,08 | UGT2B10      | UDP glucuronosyltransferase 2 family, polypeptide<br>B10                                        |
| 1,08 | STK26        | serine/threonine protein kinase 26                                                              |
| 1,08 | PRG1         | p53-responsive gene 1                                                                           |
| 1,08 | CST3         | cystatin C                                                                                      |
| 1,08 | MYO6         | Transcript Identified by AceView, Entrez Gene ID(s)<br>4646                                     |
| 1,08 | CHST12       | carbohydrate (chondroitin 4) sulfotransferase 12                                                |
| 1,08 | DCAF12L1     | DDB1 and CUL4 associated factor 12-like 1                                                       |
| 1,08 | BBS4         | Memczak2013 ALT_ACCEPTOR, ALT_DONOR,<br>coding, INTERNAL, intronic best transcript<br>NM_033028 |
| 1,08 | LRRC28       | Transcript Identified by AceView, Entrez Gene ID(s)<br>123355                                   |
| 1,08 | TUBE1        | tubulin, epsilon 1                                                                              |
| 1,08 | NCOA7        | nuclear receptor coactivator 7                                                                  |
| 1,08 | PNLIPRP2     | pancreatic lipase-related protein 2                                                             |
| 1,08 | FARSB        | phenylalanyl-tRNA synthetase beta subunit                                                       |
| 1,08 | TM4SF5       | transmembrane 4 L six family member 5                                                           |
| 1,08 | SLC37A1      | solute carrier family 37 (glucose-6-phosphate<br>transporter), member 1                         |
| 1,08 | PIK3CD       | phosphatidylinositol-4,5-bisphosphate 3-kinase,<br>catalytic subunit delta                      |
| 1,08 | CXCL14       | chemokine (C-X-C motif) ligand 14                                                               |
| 1,08 | MAP3K19      | mitogen-activated protein kinase kinase kinase 19                                               |
| 1,08 | MBD6         | methyl-CpG binding domain protein 6                                                             |
| 1,08 | PCDH1        | protocadherin 1                                                                                 |
| 1,08 | SRRM1        | serine/arginine repetitive matrix 1                                                             |
| 1,08 | GRHL2        | grainyhead-like transcription factor 2                                                          |
| 1,08 | PTGIR        | prostaglandin I2 (prostacyclin) receptor (IP)                                                   |
| 1,08 | ZNF382       | zinc finger protein 382                                                                         |
| 1,08 | USP46        | ubiquitin specific peptidase 46                                                                 |
| 1,08 | ASB5         | ankyrin repeat and SOCS box containing 5                                                        |
| 1,08 | NR1H3        | nuclear receptor subfamily 1, group H, member 3                                                 |
| 1,08 | C11orf74     | chromosome 11 open reading frame 74                                                             |
| 1,08 | CXorf38      | chromosome X open reading frame 38                                                              |
| 1,08 | C8orf48      | chromosome 8 open reading frame 48                                                              |
| 1,08 | RCVRN        | recoverin                                                                                       |
| 1,08 | ZBTB17       | zinc finger and BTB domain containing 17                                                        |

|      |                     |                                                                        |
|------|---------------------|------------------------------------------------------------------------|
| 1,08 | ZNF589              | zinc finger protein 589                                                |
| 1,08 | OR4C13              | olfactory receptor, family 4, subfamily C, member 13                   |
| 1,08 | DUSP27              | dual specificity phosphatase 27 (putative)                             |
| 1,08 | HMBS                | hydroxymethylbilane synthase                                           |
| 1,08 | DPF3                | D4, zinc and double PHD fingers, family 3                              |
| 1,08 | KIAA1919            | KIAA1919                                                               |
| 1,08 | SEH1L               | SEH1-like nucleoporin                                                  |
| 1,08 | OR6C65              | olfactory receptor, family 6, subfamily C, member 65                   |
| 1,08 | C9orf170            | chromosome 9 open reading frame 170                                    |
| 1,08 | CCL5                | chemokine (C-C motif) ligand 5                                         |
| 1,08 | AMD1                | adenosylmethionine decarboxylase 1                                     |
| 1,08 | TMEM70;<br>RPS20P21 | transmembrane protein 70; ribosomal protein S20<br>pseudogene 21       |
| 1,08 | TLX1NB              | TLX1 neighbor                                                          |
| 1,08 | PRKAG3              | protein kinase, AMP-activated, gamma 3 non-catalytic<br>subunit        |
| 1,08 | NTN1                | netrin 1                                                               |
| 1,08 | GPR83               | G protein-coupled receptor 83                                          |
| 1,08 | AKR1C3              | aldo-keto reductase family 1, member C3                                |
| 1,08 | ZNF160              | Transcript Identified by AceView, Entrez Gene ID(s)<br>90338           |
| 1,08 | KRTAP21-3           | keratin associated protein 21-3                                        |
| 1,08 | MKRN2OS             | MKRN2 opposite strand                                                  |
| 1,08 | GLTPD2              | glycolipid transfer protein domain containing 2                        |
| 1,08 | CLASP2              | Transcript Identified by AceView, Entrez Gene ID(s)<br>23122           |
| 1,08 | RAD51AP2            | RAD51 associated protein 2                                             |
| 1,08 | KREMEN1             | kringle containing transmembrane protein 1                             |
| 1,08 | ATG16L1             | autophagy related 16-like 1                                            |
| 1,08 | BOLA1               | bolA family member 1                                                   |
| 1,08 | ADM2                | adrenomedullin 2                                                       |
| 1,08 | SIGLEC10            | sialic acid binding Ig-like lectin 10                                  |
| 1,08 | LYRM4               | LYR motif containing 4                                                 |
| 1,08 | KIZ                 | kizuna centrosomal protein                                             |
| 1,08 | PLCB2               | phospholipase C, beta 2                                                |
| 1,08 | SPIN2A              | spindlin family, member 2A                                             |
| 1,08 | GRXCR1              | glutaredoxin, cysteine rich 1                                          |
| 1,08 | NECAB3              | N-terminal EF-hand calcium binding protein 3                           |
| 1,08 | LENG9               | leukocyte receptor cluster (LRC) member 9                              |
| 1,08 | FUT7                | fucosyltransferase 7 (alpha (1,3) fucosyltransferase)                  |
| 1,08 | SLC6A19             | solute carrier family 6 (neutral amino acid transporter),<br>member 19 |
| 1,08 | DXO                 | decapping exoribonuclease                                              |
| 1,08 | KYNU                | kynureninase                                                           |
| 1,08 | NUDCD2              | NudC domain containing 2                                               |
| 1,08 | TYMSOS              | TYMS opposite strand                                                   |
| 1,08 | CT47B1              | cancer/testis antigen family 47, member B1                             |
| 1,08 | GAGE10              | G antigen 10                                                           |
| 1,08 | TMEM163             | transmembrane protein 163                                              |
| 1,08 | ZNF577              | zinc finger protein 577                                                |

|      |                |                                                                                           |
|------|----------------|-------------------------------------------------------------------------------------------|
| 1,08 | GPR173         | G protein-coupled receptor 173                                                            |
| 1,08 | LIMK1          | LIM domain kinase 1                                                                       |
| 1,08 | CRY2           | cryptochrome circadian clock 2                                                            |
| 1,08 | ZNF501         | zinc finger protein 501 [Source:HGNC Symbol;Acc:HGNC:23717]                               |
| 1,08 | CTDSPL         | CTD small phosphatase like                                                                |
| 1,08 | PN01           | partner of NOB1 homolog                                                                   |
| 1,08 | MMAA           | methylmalonic aciduria (cobalamin deficiency) cblA type                                   |
| 1,08 | NMNAT2         | nicotinamide nucleotide adenyltransferase 2                                               |
| 1,08 | VASH2          | vasohibin 2                                                                               |
| 1,08 | ZNF91          | zinc finger protein 91                                                                    |
| 1,08 | TTC21B         | tetratricopeptide repeat domain 21B                                                       |
| 1,08 | POMC           | proopiomelanocortin                                                                       |
| 1,08 | IGFBP2         | insulin like growth factor binding protein 2                                              |
| 1,08 | AIF1           | allograft inflammatory factor 1                                                           |
| 1,08 | SMG9           | SMG9 nonsense mediated mRNA decay factor                                                  |
| 1,08 | SWSAP1         | SWIM-type zinc finger 7 associated protein 1                                              |
| 1,08 | ZNF518B        | zinc finger protein 518B                                                                  |
| 1,08 | IREB2          | iron responsive element binding protein 2                                                 |
| 1,08 | SPATA17        | spermatogenesis associated 17                                                             |
| 1,08 | FZD10          | frizzled class receptor 10                                                                |
| 1,08 | GRP            | gastrin-releasing peptide                                                                 |
| 1,08 | ASCC3          | Memczak2013 ALT_ACCEPTOR, ALT_DONOR, coding, INTERNAL, intronic best transcript NM_006828 |
| 1,08 | MAGEA1         | MAGE family member A1                                                                     |
| 1,08 | ZNF131         | zinc finger protein 131                                                                   |
| 1,08 | NAT8           | N-acetyltransferase 8 (GCN5-related, putative)                                            |
| 1,08 | TNFRSF1A       | tumor necrosis factor receptor superfamily, member 1A                                     |
| 1,08 | PARVG          | parvin, gamma                                                                             |
| 1,08 | RFESD          | Rieske (Fe-S) domain containing                                                           |
| 1,08 | NKAIN3         | Na <sup>+</sup> /K <sup>+</sup> transporting ATPase interacting 3                         |
| 1,08 | KLHL5          | kelch-like family member 5                                                                |
| 1,08 | ARL2BP         | ADP-ribosylation factor like GTPase 2 binding protein                                     |
| 1,08 | CEP44          | centrosomal protein 44kDa                                                                 |
| 1,08 | RCAN2          | regulator of calcineurin 2                                                                |
| 1,08 | ARMCX5-GPRASP2 | ARMCX5-GPRASP2 readthrough                                                                |
| 1,08 | ZNF668         | zinc finger protein 668                                                                   |
| 1,08 | KCNA5          | potassium channel, voltage gated shaker related subfamily A, member 5                     |
| 1,08 | FABP6          | Memczak2013 ANTISENSE, coding, INTERNAL, intronic best transcript NM_001040442            |
| 1,08 | ARMCX4         | armadillo repeat containing, X-linked 4                                                   |
| 1,08 | CDKN2A         | cyclin-dependent kinase inhibitor 2A                                                      |
| 1,08 | FLT1           | fms-related tyrosine kinase 1                                                             |
| 1,08 | VAT1           | vesicle amine transport 1                                                                 |

|      |                              |                                                                                                                  |
|------|------------------------------|------------------------------------------------------------------------------------------------------------------|
| 1,08 | TMPRSS5                      | transmembrane protease, serine 5                                                                                 |
| 1,08 | TBXA2R                       | thromboxane A2 receptor                                                                                          |
| 1,08 | OLA1                         | Obg-like ATPase 1                                                                                                |
| 1,08 | HNRNPCL1                     | heterogeneous nuclear ribonucleoprotein C-like 1                                                                 |
| 1,08 | FAM86B1                      | family with sequence similarity 86, member B1                                                                    |
| 1,08 | SCTR                         | secretin receptor                                                                                                |
| 1,08 | PLCL2                        | Memczak2013 ANTISENSE, coding, INTERNAL, intronic best transcript NM_001144382                                   |
| 1,08 | FOLR1                        | folate receptor 1 (adult)                                                                                        |
| 1,08 | SEMA4G                       | sema domain, immunoglobulin domain (Ig), transmembrane domain (TM) and short cytoplasmic domain, (semaphorin) 4G |
| 1,08 | HAPLN1                       | hyaluronan and proteoglycan link protein 1                                                                       |
| 1,08 | ITGA2                        | integrin, alpha 2 (CD49B, alpha 2 subunit of VLA-2 receptor)                                                     |
| 1,08 | ZGRF1                        | zinc finger, GRF-type containing 1                                                                               |
| 1,08 | LOC101929372;<br>AC004019.13 | uncharacterized LOC101929372; novel transcript                                                                   |
| 1,08 | NUFIP1                       | nuclear fragile X mental retardation protein interacting protein 1                                               |
| 1,08 | LHX4                         | LIM homeobox 4                                                                                                   |
| 1,08 | GAREM2                       | GRB2 associated regulator of MAPK1 2                                                                             |
| 1,08 | CDK5R2                       | cyclin-dependent kinase 5, regulatory subunit 2 (p39)                                                            |
| 1,08 | GALP                         | galanin-like peptide                                                                                             |
| 1,08 | C2CD5                        | C2 calcium-dependent domain containing 5                                                                         |
| 1,08 | RIMS2                        | regulating synaptic membrane exocytosis 2                                                                        |
| 1,08 | CD93                         | CD93 molecule                                                                                                    |
| 1,08 | RPL7A                        | ribosomal protein L7a                                                                                            |
| 1,08 | GAS8-AS1                     | GAS8 antisense RNA 1                                                                                             |
| 1,08 | SNX21                        | sorting nexin family member 21                                                                                   |
| 1,08 | SCNN1A                       | sodium channel, non voltage gated 1 alpha subunit                                                                |
| 1,08 | GLI2                         | GLI family zinc finger 2                                                                                         |
| 1,08 | SF3B4                        | splicing factor 3b, subunit 4, 49kDa                                                                             |
| 1,08 | SPG11                        | spastic paraplegia 11 (autosomal recessive)                                                                      |
| 1,08 | MT1M                         | metallothionein 1M                                                                                               |
| 1,08 | GDAP1                        | ganglioside induced differentiation associated protein 1                                                         |
| 1,08 | NAT10                        | N-acetyltransferase 10 (GCN5-related)                                                                            |
| 1,08 | LAPTM5                       | lysosomal protein transmembrane 5                                                                                |
| 1,08 | TNFSF4                       | tumor necrosis factor (ligand) superfamily, member 4                                                             |
| 1,08 | ASPG                         | asparaginase                                                                                                     |
| 1,08 | C11orf24                     | chromosome 11 open reading frame 24                                                                              |
| 1,08 | KAAG1                        | kidney associated antigen 1                                                                                      |
| 1,08 | TMEM176A                     | transmembrane protein 176A                                                                                       |
| 1,08 | RTN4RL2                      | reticulon 4 receptor-like 2                                                                                      |
| 1,08 | PKDREJ                       | polycystin (PKD) family receptor for egg jelly                                                                   |
| 1,08 | HCN1                         | hyperpolarization activated cyclic nucleotide gated potassium channel 1                                          |
| 1,08 | ST20-AS1                     | ST20 antisense RNA 1                                                                                             |
| 1,08 | ZNF75D                       | zinc finger protein 75D                                                                                          |

|      |            |                                                                             |
|------|------------|-----------------------------------------------------------------------------|
| 1,08 | DLX1       | distal-less homeobox 1                                                      |
| 1,08 | RHBDL2     | rhomoid, veinlet-like 2 (Drosophila)                                        |
| 1,08 | KIF25-AS1  | KIF25 antisense RNA 1                                                       |
| 1,08 | PNPLA2     | patatin-like phospholipase domain containing 2                              |
| 1,08 | PRSS3      | protease, serine, 3                                                         |
| 1,08 | HDLBP      | Jeck2013 ANTISENSE, coding, INTERNAL, intronic<br>best transcript NM_005336 |
| 1,08 | MOS        | v-mos Moloney murine sarcoma viral oncogene<br>homolog                      |
| 1,08 | LINC01599  | long intergenic non-protein coding RNA 1599                                 |
| 1,08 | SNRPF      | small nuclear ribonucleoprotein polypeptide F                               |
| 1,08 | AXDND1     | axonemal dynein light chain domain containing 1                             |
| 1,08 | ACTA1      | actin, alpha 1, skeletal muscle                                             |
| 1,08 | PIGU       | phosphatidylinositol glycan anchor biosynthesis class<br>U                  |
| 1,08 | AKR1C2     | aldo-keto reductase family 1, member C2                                     |
| 1,08 | ZNF134     | zinc finger protein 134                                                     |
| 1,08 | CCNJL      | cyclin J-like                                                               |
| 1,08 | YIPF4      | Yip1 domain family member 4                                                 |
| 1,08 | TBC1D12    | TBC1 domain family, member 12                                               |
| 1,08 | DLAT       | dihydrolipoamide S-acetyltransferase                                        |
| 1,08 | NIT2       | nitrilase family, member 2                                                  |
| 1,08 | FAM160B1   | family with sequence similarity 160, member B1                              |
| 1,08 | LRRCC1     | Transcript Identified by AceView, Entrez Gene ID(s)<br>85444                |
| 1,08 | KIAA1217   | KIAA1217                                                                    |
| 1,08 | ZNF823     | zinc finger protein 823                                                     |
| 1,08 | DLK1       | delta-like 1 homolog (Drosophila)                                           |
| 1,08 | C16orf82   | chromosome 16 open reading frame 82                                         |
| 1,08 | LIG4       | ligase IV, DNA, ATP-dependent                                               |
| 1,08 | SYTL3      | synaptotagmin-like 3                                                        |
| 1,08 | TBC1D8B    | TBC1 domain family, member 8B (with GRAM<br>domain)                         |
| 1,08 | MANSC1     | MANSC domain containing 1                                                   |
| 1,08 | RASA3      | RAS p21 protein activator 3                                                 |
| 1,08 | PIM2       | Pim-2 proto-oncogene, serine/threonine kinase                               |
| 1,08 | TCEAL4     | transcription elongation factor A (SII)-like 4                              |
| 1,08 | TNFSF9     | tumor necrosis factor (ligand) superfamily, member 9                        |
| 1,08 | OR51I2     | olfactory receptor, family 51, subfamily I, member 2                        |
| 1,08 | HBG2; HBG1 | hemoglobin, gamma G; hemoglobin, gamma A                                    |
| 1,08 | LCE3C      | late cornified envelope 3C                                                  |
| 1,08 | OR5AC1     | olfactory receptor, family 5, subfamily AC, member 1<br>(gene/pseudogene)   |
| 1,08 | PRPH2      | peripherin 2 (retinal degeneration, slow)                                   |
| 1,08 | RSBN1L     | round spermatid basic protein 1-like                                        |
| 1,08 | C2CD4D     | C2 calcium-dependent domain containing 4D                                   |
| 1,08 | IL36G      | interleukin 36, gamma                                                       |
| 1,08 | SLC45A1    | solute carrier family 45, member 1                                          |
| 1,08 | USP27X     | ubiquitin specific peptidase 27, X-linked                                   |
| 1,08 | IFNA4      | interferon, alpha 4                                                         |

|      |                |                                                                                           |
|------|----------------|-------------------------------------------------------------------------------------------|
| 1,08 | PERP           | PERP, TP53 apoptosis effector                                                             |
| 1,08 | PPIAP30        | peptidylprolyl isomerase A (cyclophilin A) pseudogene 30                                  |
| 1,08 | RTKN2          | rhotekin 2                                                                                |
| 1,08 | SPTBN4         | spectrin, beta, non-erythrocytic 4                                                        |
| 1,08 | CCDC84         | coiled-coil domain containing 84                                                          |
| 1,08 | CABP2          | calcium binding protein 2                                                                 |
| 1,08 | TNR            | tenascin R                                                                                |
| 1,08 | FAM153C        | family with sequence similarity 153, member C, pseudogene                                 |
| 1,08 | RPE65          | retinal pigment epithelium-specific protein 65kDa                                         |
| 1,08 | GPR180         | G protein-coupled receptor 180                                                            |
| 1,08 | CDC42BPG       | CDC42 binding protein kinase gamma (DMPK-like)                                            |
| 1,08 | TPTE2          | transmembrane phosphoinositide 3-phosphatase and tensin homolog 2                         |
| 1,08 | PCBP4          | poly(rC) binding protein 4                                                                |
| 1,08 | CHRM1          | cholinergic receptor, muscarinic 1                                                        |
| 1,08 | CPZ; GPR78     | carboxypeptidase Z; G protein-coupled receptor 78                                         |
| 1,08 | GABRD          | gamma-aminobutyric acid (GABA) A receptor, delta                                          |
| 1,08 | KIAA0226L      | KIAA0226-like                                                                             |
| 1,08 | VWA5A          | von Willebrand factor A domain containing 5A                                              |
| 1,08 | EFHD1          | EF-hand domain family member D1                                                           |
| 1,08 | SMIM10         | small integral membrane protein 10                                                        |
| 1,08 | KRTAP22-2      | keratin associated protein 22-2                                                           |
| 1,08 | TBC1D10A       | TBC1 domain family, member 10A                                                            |
| 1,08 | CLEC19A        | C-type lectin domain family 19, member A                                                  |
| 1,08 | ANKRD12        | ankyrin repeat domain 12                                                                  |
| 1,08 | NCK2           | NCK adaptor protein 2                                                                     |
| 1,08 | PENK           | proenkephalin                                                                             |
| 1,08 | IGFL2          | IGF like family member 2                                                                  |
| 1,08 | TAS2R16        | taste receptor, type 2, member 16                                                         |
| 1,08 | TMSB4Y         | thymosin beta 4, Y-linked                                                                 |
| 1,08 | RFC3           | Memczak2013 ALT_ACCEPTOR, ALT_DONOR, coding, INTERNAL, intronic best transcript NM_181558 |
| 1,08 | ZIM3           | zinc finger, imprinted 3                                                                  |
| 1,08 | ACTR6          | ARP6 actin-related protein 6 homolog (yeast)                                              |
| 1,08 | SFTPA1         | surfactant protein A1                                                                     |
| 1,08 | ATG16L1        | autophagy related 16-like 1                                                               |
| 1,08 | MED18          | mediator complex subunit 18                                                               |
| 1,08 | CYP2C18        | cytochrome P450, family 2, subfamily C, polypeptide 18                                    |
| 1,08 | TMX2; C11orf31 | thioredoxin-related transmembrane protein 2; chromosome 11 open reading frame 31          |
| 1,08 | BAG6           | BCL2 associated athanogene 6                                                              |
| 1,08 | CABP1          | calcium binding protein 1                                                                 |
| 1,08 | ADAM19         | ADAM metallopeptidase domain 19                                                           |
| 1,08 | MPZL1          | myelin protein zero-like 1                                                                |
| 1,08 | OR8B8          | olfactory receptor, family 8, subfamily B, member 8                                       |
| 1,08 | CTRB1          | chymotrypsinogen B1                                                                       |

|      |                |                                                                                                           |
|------|----------------|-----------------------------------------------------------------------------------------------------------|
| 1,08 | PRAC1          | prostate cancer susceptibility candidate 1                                                                |
| 1,08 | POMT2          | protein-O-mannosyltransferase 2                                                                           |
| 1,08 | ABI2           | abl-interactor 2                                                                                          |
| 1,08 | FERD3L         | Fer3-like bHLH transcription factor                                                                       |
| 1,08 | IL1RAPL1       | interleukin 1 receptor accessory protein-like 1                                                           |
| 1,08 | TLX3           | T-cell leukemia homeobox 3                                                                                |
| 1,08 | KCNA4          | potassium channel, voltage gated shaker related subfamily A, member 4                                     |
| 1,08 | GAS6-AS1       | GAS6 antisense RNA 1                                                                                      |
| 1,08 | PEX7           | peroxisomal biogenesis factor 7                                                                           |
| 1,08 | REEP1          | receptor accessory protein 1                                                                              |
| 1,08 | OR5T2          | olfactory receptor, family 5, subfamily T, member 2                                                       |
| 1,08 | DPPA4          | developmental pluripotency associated 4                                                                   |
| 1,08 | CYP2D6         | cytochrome P450, family 2, subfamily D, polypeptide 6                                                     |
| 1,08 | ZFP64          | ZFP64 zinc finger protein                                                                                 |
| 1,08 | BATF           | basic leucine zipper transcription factor, ATF-like                                                       |
| 1,08 | TEF            | thyrotrophic embryonic factor                                                                             |
| 1,08 | GSTT2; GSTT2B  | glutathione S-transferase theta 2 (gene/pseudogene); glutathione S-transferase theta 2B (gene/pseudogene) |
| 1,08 | RASA4          | Salzman2013 ALT_ACCEPTOR, ALT_DONOR, coding, INTERNAL, intronic best transcript NM_006989                 |
| 1,08 | RPLP2; SNORA52 | ribosomal protein, large, P2; small nucleolar RNA, H/ACA box 52                                           |
| 1,08 | MPC1L          | mitochondrial pyruvate carrier 1-like                                                                     |
| 1,08 | APOBEC3C       | apolipoprotein B mRNA editing enzyme, catalytic polypeptide-like 3C                                       |
| 1,08 | OSBPL9         | oxysterol binding protein-like 9                                                                          |
| 1,08 | DPYS           | dihydropyrimidinase                                                                                       |
| 1,08 | NOLC1          | nucleolar and coiled-body phosphoprotein 1                                                                |
| 1,08 | CNNM3          | Zhang2013 ALT_ACCEPTOR, ALT_DONOR, coding, INTERNAL, intronic, OVERLAPTX best transcript NM_017623        |
| 1,08 | DDX11          | Zhang2013 ALT_ACCEPTOR, ALT_DONOR, coding, INTERNAL, intronic best transcript NM_030653                   |
| 1,08 | ZNF614         | zinc finger protein 614                                                                                   |
| 1,08 | TELO2          | telomere maintenance 2                                                                                    |
| 1,08 | KCNQ5          | potassium channel, voltage gated KQT-like subfamily Q, member 5                                           |
| 1,08 | CCDC141        | coiled-coil domain containing 141                                                                         |
| 1,08 | IFI44          | interferon-induced protein 44                                                                             |
| 1,08 | DSCR10         | Down syndrome critical region 10 (non-protein coding)                                                     |
| 1,08 | RETN           | resistin                                                                                                  |
| 1,08 | PRDM13         | PR domain containing 13                                                                                   |
| 1,08 | OR4A16         | olfactory receptor, family 4, subfamily A, member 16                                                      |
| 1,08 | CFP            | complement factor properdin                                                                               |
| 1,08 | LBX2           | ladybird homeobox 2                                                                                       |

|      |                      |                                                                                                                |
|------|----------------------|----------------------------------------------------------------------------------------------------------------|
| 1,08 | SLITRK3              | SLIT and NTRK-like family, member 3                                                                            |
| 1,08 | CRMP1                | Salzman2013 ANTISENSE, CDS, coding, INTERNAL, intronic, OVCODE, OVERLAPTX, OVEXON best transcript NM_001014809 |
| 1,08 | ALDOB                | aldolase B, fructose-bisphosphate                                                                              |
| 1,08 | C9orf3; RP11-49O14.3 | Transcript Identified by AceView, Entrez Gene ID(s) 84909; novel transcript                                    |
| 1,08 | FAM71D               | family with sequence similarity 71, member D                                                                   |
| 1,08 | LINC01521            | long intergenic non-protein coding RNA 1521                                                                    |
| 1,08 | FXVD5                | FXVD domain containing ion transport regulator 5                                                               |
| 1,08 | PLD4                 | phospholipase D family, member 4                                                                               |
| 1,08 | ALPK2                | alpha kinase 2                                                                                                 |
| 1,08 | SLC29A4              | solute carrier family 29 (equilibrative nucleoside transporter), member 4                                      |
| 1,08 | KLF8                 | Kruppel-like factor 8                                                                                          |
| 1,08 | CXCL2                | chemokine (C-X-C motif) ligand 2                                                                               |
| 1,08 | MAPK8IP3             | mitogen-activated protein kinase 8 interacting protein 3                                                       |
| 1,08 | MAGI3                | Jeck2013 ALT_ACCEPTOR, ALT_DONOR, coding, INTERNAL, intronic best transcript NM_152900                         |
| 1,08 | ZDHHC3               | zinc finger, DHHC-type containing 3                                                                            |
| 1,08 | DVL1; MIR6808        | dishevelled segment polarity protein 1; microRNA 6808                                                          |
| 1,08 | LDHC                 | lactate dehydrogenase C                                                                                        |
| 1,08 | TMC8                 | transmembrane channel like 8                                                                                   |
| 1,08 | MTMR4                | myotubularin related protein 4                                                                                 |
| 1,08 | TRIM58               | tripartite motif containing 58                                                                                 |
| 1,08 | ACHE                 | acetylcholinesterase (Yt blood group)                                                                          |
| 1,08 | PRKAA1               | protein kinase, AMP-activated, alpha 1 catalytic subunit                                                       |
| 1,08 | MUCL1                | mucin-like 1                                                                                                   |
| 1,08 | HS3ST3B1             | heparan sulfate (glucosamine) 3-O-sulfotransferase 3B1                                                         |
| 1,08 | HAP1                 | huntingtin-associated protein 1                                                                                |
| 1,08 | RMND5B               | required for meiotic nuclear division 5 homolog B                                                              |
| 1,08 | IGFALS               | insulin-like growth factor binding protein, acid labile subunit                                                |
| 1,08 | HMX1                 | H6 family homeobox 1                                                                                           |
| 1,08 | HNRNPCL1             | heterogeneous nuclear ribonucleoprotein C-like 1                                                               |
| 1,08 | TRMT2B               | tRNA methyltransferase 2 homolog B                                                                             |
| 1,08 | ALS2CR12             | amyotrophic lateral sclerosis 2 chromosome region candidate 12                                                 |
| 1,08 | TERF2                | telomeric repeat binding factor 2                                                                              |
| 1,08 | TP53TG3D             | TP53 target 3D                                                                                                 |
| 1,08 | CIB2                 | calcium and integrin binding family member 2                                                                   |
| 1,08 | FNDC3B               | fibronectin type III domain containing 3B                                                                      |
| 1,08 | NRN1L                | neuritin 1-like                                                                                                |
| 1,08 | AUNIP                | aurora kinase A and ninein interacting protein                                                                 |
| 1,08 | SLC25A16             | solute carrier family 25 (mitochondrial carrier), member 16                                                    |

|      |              |                                                                                |
|------|--------------|--------------------------------------------------------------------------------|
| 1,08 | RAB6C        | RAB6C, member RAS oncogene family                                              |
| 1,08 | FARSA        | phenylalanyl-tRNA synthetase alpha subunit                                     |
| 1,08 | FAM151A      | family with sequence similarity 151, member A                                  |
| 1,08 | SLC35C2      | solute carrier family 35 (GDP-fucose transporter), member C2                   |
| 1,08 | TRMT11       | tRNA methyltransferase 11 homolog                                              |
| 1,08 | P2RX6        | purinergic receptor P2X, ligand gated ion channel, 6                           |
| 1,08 | NMRAL1       | NmrA-like family domain containing 1                                           |
| 1,08 | TMEM59L      | transmembrane protein 59-like                                                  |
| 1,08 | S100A10      | S100 calcium binding protein A10                                               |
| 1,08 | SAG          | S-antigen; retina and pineal gland (arrestin)                                  |
| 1,08 | VCX2         | variable charge, X-linked 2                                                    |
| 1,08 | PRSS56       | protease, serine, 56                                                           |
| 1,08 | GRHL1        | grainyhead-like transcription factor 1                                         |
| 1,08 | CCDC136      | coiled-coil domain containing 136                                              |
| 1,08 | METAP1       | methionyl aminopeptidase 1                                                     |
| 1,08 | RBM12; CPNE1 | RNA binding motif protein 12; copine I                                         |
| 1,08 | MPP4         | membrane protein, palmitoylated 4                                              |
| 1,08 | KIF5B        | Memczak2013 ANTISENSE, CDS, coding, INTERNAL, UTR3 best transcript NM_004521   |
| 1,08 | C14orf39     | chromosome 14 open reading frame 39                                            |
| 1,08 | RTN4         | reticulon 4                                                                    |
| 1,08 | EHD3         | EH domain containing 3                                                         |
| 1,08 | MT2A         | metallothionein 2A                                                             |
| 1,08 | LTK          | leukocyte receptor tyrosine kinase                                             |
| 1,08 | TNFSF10      | tumor necrosis factor (ligand) superfamily, member 10                          |
| 1,08 | ATP5L2       | ATP synthase, H <sup>+</sup> transporting, mitochondrial Fo complex subunit G2 |
| 1,08 | HKR1         | HKR1, GLI-Kruppel zinc finger family member                                    |
| 1,08 | ZNF35        | zinc finger protein 35                                                         |
| 1,08 | VPS11        | VPS11, CORVET/HOPS core subunit [Source:HGNC Symbol;Acc:HGNC:14583]            |
| 1,08 | MRPS35       | mitochondrial ribosomal protein S35                                            |
| 1,08 | MYL10        | myosin light chain 10                                                          |
| 1,08 | RFK          | riboflavin kinase                                                              |
| 1,08 | OR14J1       | olfactory receptor, family 14, subfamily J, member 1                           |
| 1,08 | POP4         | POP4 homolog, ribonuclease P/MRP subunit                                       |
| 1,08 | MTRR         | 5-methyltetrahydrofolate-homocysteine methyltransferase reductase              |
| 1,08 | MYO1A        | myosin IA                                                                      |
| 1,08 | CCSER1       | coiled-coil serine rich protein 1                                              |
| 1,08 | ESRRA        | estrogen-related receptor alpha                                                |
| 1,08 | CSNK2A1      | casein kinase 2, alpha 1 polypeptide                                           |
| 1,08 | LRP5         | LDL receptor related protein 5                                                 |
| 1,08 | CD38         | CD38 molecule                                                                  |
| 1,08 | CHMP6        | charged multivesicular body protein 6                                          |
| 1,08 | INSR         | insulin receptor                                                               |
| 1,08 | SLC6A12      | solute carrier family 6 (neurotransmitter transporter), member 12              |

|      |                                                         |                                                                                                                                                           |
|------|---------------------------------------------------------|-----------------------------------------------------------------------------------------------------------------------------------------------------------|
| 1,08 | HCRT                                                    | hypocretin (orexin) neuropeptide precursor                                                                                                                |
| 1,08 | HOXD1;<br>MIR7704                                       | homeobox D1; microRNA 7704                                                                                                                                |
| 1,08 | ORC6                                                    | origin recognition complex subunit 6                                                                                                                      |
| 1,08 | DTL                                                     | denticleless E3 ubiquitin protein ligase homolog (Drosophila)                                                                                             |
| 1,08 | GFI1B                                                   | growth factor independent 1B transcription repressor                                                                                                      |
| 1,08 | TMEM156                                                 | transmembrane protein 156                                                                                                                                 |
| 1,08 | ICAM3                                                   | intercellular adhesion molecule 3                                                                                                                         |
| 1,08 | TMEM179B;<br>MIR6748                                    | transmembrane protein 179B; microRNA 6748                                                                                                                 |
| 1,08 | DNAH5                                                   | Transcript Identified by AceView, Entrez Gene ID(s) 1767                                                                                                  |
| 1,08 | PLSCR5                                                  | phospholipid scramblase family, member 5                                                                                                                  |
| 1,08 | PRKRIP1                                                 | PRKR interacting protein 1 (IL11 inducible)                                                                                                               |
| 1,08 | CHCHD7                                                  | coiled-coil-helix-coiled-coil-helix domain containing 7                                                                                                   |
| 1,08 | SCARB1                                                  | scavenger receptor class B, member 1                                                                                                                      |
| 1,08 | C12orf66                                                | chromosome 12 open reading frame 66                                                                                                                       |
| 1,08 | SLC25A22                                                | solute carrier family 25 (mitochondrial carrier: glutamate), member 22                                                                                    |
| 1,08 | LRRC2                                                   | leucine rich repeat containing 2                                                                                                                          |
| 1,08 | SCN1B                                                   | sodium channel, voltage gated, type I beta subunit                                                                                                        |
| 1,08 | TAGAP                                                   | T-cell activation RhoGTPase activating protein                                                                                                            |
| 1,08 | MSGN1                                                   | mesogenin 1                                                                                                                                               |
| 1,08 | ZNF547;<br>TRAPPC2B;<br>TRAPPC2                         | zinc finger protein 547; trafficking protein particle complex 2B; trafficking protein particle complex 2                                                  |
| 1,08 | OBP2B                                                   | odorant binding protein 2B                                                                                                                                |
| 1,08 | CRYBB3                                                  | crystallin beta B3                                                                                                                                        |
| 1,08 | CSPG4P1Y;<br>DNM1P24                                    | chondroitin sulfate proteoglycan 4 pseudogene 1, Y-linked; dynamin 1 pseudogene 24                                                                        |
| 1,08 | TFR2                                                    | transferrin receptor 2                                                                                                                                    |
| 1,08 | PLEKHB1                                                 | pleckstrin homology domain containing, family B (evectins) member 1                                                                                       |
| 1,08 | WFIKKN1                                                 | WAP, follistatin/kazal, immunoglobulin, kunitz and netrin domain containing 1                                                                             |
| 1,08 | MPZL2                                                   | myelin protein zero-like 2                                                                                                                                |
| 1,08 | ZBTB49                                                  | zinc finger and BTB domain containing 49                                                                                                                  |
| 1,08 | MBOAT2                                                  | Memczak2013 ALT_ACCEPTOR, ALT_DONOR, coding, INTERNAL, intronic best transcript NM_138799                                                                 |
| 1,08 | ADAMDEC1                                                | ADAM-like, decysin 1                                                                                                                                      |
| 1,08 | SPATA8                                                  | spermatogenesis associated 8                                                                                                                              |
| 1,08 | COX2                                                    | cytochrome c oxidase subunit II                                                                                                                           |
| 1,08 | TBC1D3B;<br>TBC1D3H;<br>TBC1D3I;<br>TBC1D3F;<br>TBC1D3G | TBC1 domain family, member 3B; TBC1 domain family, member 3H; TBC1 domain family, member 3I; TBC1 domain family, member 3F; TBC1 domain family, member 3G |
| 1,08 | METTL24                                                 | methyltransferase like 24                                                                                                                                 |

|      |                               |                                                                                                        |
|------|-------------------------------|--------------------------------------------------------------------------------------------------------|
| 1,08 | RPRD1B                        | regulation of nuclear pre-mRNA domain containing 1B                                                    |
| 1,08 | CNTD1                         | cyclin N-terminal domain containing 1                                                                  |
| 1,08 | GALNT9                        | polypeptide N-acetylgalactosaminyltransferase 9                                                        |
| 1,08 | PITX2                         | paired-like homeodomain 2                                                                              |
| 1,08 | DPYSL5                        | dihydropyrimidinase-like 5                                                                             |
| 1,08 | SUPV3L1                       | SUV3-like helicase                                                                                     |
| 1,08 | NSUN5                         | NOP2/Sun domain family, member 5                                                                       |
| 1,08 | SH2D1A                        | SH2 domain containing 1A                                                                               |
| 1,08 | SYNJ2BP-COX16; COX16; SYNJ2BP | SYNJ2BP-COX16 readthrough; COX16 cytochrome c oxidase assembly homolog; synaptojanin 2 binding protein |
| 1,08 | PAPD4                         | PAP associated domain containing 4                                                                     |
| 1,08 | CTB-75G16.3; MRM1             | Transcript Identified by AceView, Entrez Gene ID(s) 79922; novel transcript                            |
| 1,08 | WDR19                         | WD repeat domain 19                                                                                    |
| 1,08 | CYP2A7                        | cytochrome P450, family 2, subfamily A, polypeptide 7                                                  |
| 1,08 | ACSL4                         | acyl-CoA synthetase long-chain family member 4                                                         |
| 1,08 | SLC46A2                       | solute carrier family 46, member 2                                                                     |
| 1,08 | KIRREL3                       | Jeck2013 ALT_ACCEPTOR, ALT_DONOR, coding, INTERNAL, intronic best transcript NM_032531                 |
| 1,08 | GIMD1                         | GIMAP family P-loop NTPase domain containing 1                                                         |
| 1,08 | CCDC138                       | coiled-coil domain containing 138                                                                      |
| 1,08 | SYCP3                         | synaptonemal complex protein 3                                                                         |
| 1,08 | ASTE1                         | asteroid homolog 1 (Drosophila)                                                                        |
| 1,08 | CYTB                          | cytochrome b                                                                                           |
| 1,08 | GAL                           | galanin/GMAP prepropeptide                                                                             |
| 1,08 | OR7E24                        | olfactory receptor, family 7, subfamily E, member 24                                                   |
| 1,08 | ZDHHC8                        | zinc finger, DHHC-type containing 8                                                                    |
| 1,08 | FKBP4                         | FK506 binding protein 4                                                                                |
| 1,08 | FCGR3A                        | Fc fragment of IgG, low affinity IIIa, receptor (CD16a)                                                |
| 1,08 | ME2                           | malic enzyme 2, NAD(+)-dependent, mitochondrial                                                        |
| 1,08 | RNPS1                         | RNA binding protein S1, serine-rich domain                                                             |
| 1,08 | FAM186A                       | family with sequence similarity 186, member A                                                          |
| 1,08 | GDE1                          | glycerophosphodiester phosphodiesterase 1                                                              |
| 1,08 | MOB3A                         | MOB kinase activator 3A                                                                                |
| 1,08 | OR13D1                        | olfactory receptor, family 13, subfamily D, member 1                                                   |
| 1,08 | NME5                          | NME/NM23 family member 5                                                                               |
| 1,08 | OBP2B                         | odorant binding protein 2B                                                                             |
| 1,08 | C12orf76                      | chromosome 12 open reading frame 76                                                                    |
| 1,08 | CFAP157                       | cilia and flagella associated protein 157                                                              |
| 1,08 | ATP8A1                        | ATPase, aminophospholipid transporter (APLT), class I, type 8A, member 1                               |
| 1,08 | TMEM259                       | transmembrane protein 259                                                                              |
| 1,08 | FLRT2                         | fibronectin leucine rich transmembrane protein 2                                                       |
| 1,08 | IARS                          | isoleucyl-tRNA synthetase                                                                              |
| 1,08 | MIR4738; H3F3B                | microRNA 4738; H3 histone, family 3B (H3.3B)                                                           |

|      |                             |                                                                                                            |
|------|-----------------------------|------------------------------------------------------------------------------------------------------------|
| 1,08 | PRH1; TAS2R14;<br>PRR4      | proline-rich protein HaeIII subfamily 1; taste receptor, type 2, member 14; proline rich 4 (lacrimal)      |
| 1,08 | ARPP21                      | Transcript Identified by AceView, Entrez Gene ID(s) 10777                                                  |
| 1,08 | BRD7                        | bromodomain containing 7                                                                                   |
| 1,08 | CDRT15L2                    | CMT1A duplicated region transcript 15-like 2                                                               |
| 1,08 | CC2D2A                      | coiled-coil and C2 domain containing 2A                                                                    |
| 1,08 | PANO1                       | proapoptotic nucleolar protein 1                                                                           |
| 1,08 | DNAJC7                      | Zhang2013 ALT_ACCEPTOR, ALT_DONOR, coding, INTERNAL, intronic, OVERLAPTX, OVEXON best transcript NM_003315 |
| 1,08 | GIGYF2                      | GRB10 interacting GYF protein 2                                                                            |
| 1,08 | UTS2                        | urotensin 2                                                                                                |
| 1,08 | LCE2D                       | late cornified envelope 2D                                                                                 |
| 1,08 | POGZ                        | Transcript Identified by AceView, Entrez Gene ID(s) 23126                                                  |
| 1,08 | SCGB3A1                     | secretoglobin, family 3A, member 1                                                                         |
| 1,08 | HMBS                        | hydroxymethylbilane synthase                                                                               |
| 1,08 | CNOT2                       | CCR4-NOT transcription complex subunit 2                                                                   |
| 1,08 | RPRD1A                      | regulation of nuclear pre-mRNA domain containing 1A                                                        |
| 1,08 | TMEM43                      | transmembrane protein 43                                                                                   |
| 1,08 | CYP1B1                      | cytochrome P450, family 1, subfamily B, polypeptide 1                                                      |
| 1,08 | COPS7A                      | COP9 signalosome subunit 7A                                                                                |
| 1,08 | ZNF467                      | zinc finger protein 467                                                                                    |
| 1,08 | GRAMD1A                     | GRAM domain containing 1A                                                                                  |
| 1,08 | PARP8                       | poly(ADP-ribose) polymerase family member 8                                                                |
| 1,08 | IL10                        | interleukin 10                                                                                             |
| 1,08 | ADORA3;<br>TMIGD3           | adenosine A3 receptor; transmembrane and immunoglobulin domain containing 3                                |
| 1,08 | CRK                         | v-crk avian sarcoma virus CT10 oncogene homolog                                                            |
| 1,08 | SH2D6                       | SH2 domain containing 6                                                                                    |
| 1,08 | DEFB108B                    | defensin, beta 108B                                                                                        |
| 1,08 | DFNA5                       | deafness, autosomal dominant 5                                                                             |
| 1,08 | IL1A                        | interleukin 1 alpha                                                                                        |
| 1,08 | DDX39B;<br>SNORD84          | DEAD (Asp-Glu-Ala-Asp) box polypeptide 39B; small nucleolar RNA, C/D box 84                                |
| 1,07 | KRT9                        | keratin 9, type I                                                                                          |
| 1,07 | FRS3                        | fibroblast growth factor receptor substrate 3                                                              |
| 1,07 | LOC100130880;<br>AC022173.2 | uncharacterized LOC100130880; novel transcript                                                             |
| 1,07 | STH                         | saitohin                                                                                                   |
| 1,07 | PAPSS2                      | 3-phosphoadenosine 5-phosphosulfate synthase 2                                                             |
| 1,07 | CNEP1R1                     | CTD nuclear envelope phosphatase 1 regulatory subunit 1                                                    |
| 1,07 | CEP126                      | centrosomal protein 126kDa                                                                                 |
| 1,07 | GZMA                        | granzyme A                                                                                                 |
| 1,07 | SLC25A39                    | solute carrier family 25, member 39                                                                        |
| 1,07 | IZUMO1                      | izumo sperm-egg fusion 1                                                                                   |

|      |           |                                                                                                            |
|------|-----------|------------------------------------------------------------------------------------------------------------|
| 1,07 | RAI14     | Transcript Identified by AceView, Entrez Gene ID(s)<br>26064                                               |
| 1,07 | WASL      | Wiskott-Aldrich syndrome-like                                                                              |
| 1,07 | MTA1      | metastasis associated 1                                                                                    |
| 1,07 | TRIB2     | tribbles pseudokinase 2                                                                                    |
| 1,07 | SIAH1     | siah E3 ubiquitin protein ligase 1                                                                         |
| 1,07 | LMF1      | lipase maturation factor 1                                                                                 |
| 1,07 | PAK7      | p21 protein (Cdc42/Rac)-activated kinase 7                                                                 |
| 1,07 | TEPP      | testis, prostate and placenta expressed                                                                    |
| 1,07 | SLC26A5   | solute carrier family 26 (anion exchanger), member 5                                                       |
| 1,07 | CNDP2     | CNDP dipeptidase 2 (metallopeptidase M20 family)                                                           |
| 1,07 | OSGIN2    | oxidative stress induced growth inhibitor family<br>member 2                                               |
| 1,07 | SIRT3     | sirtuin 3                                                                                                  |
| 1,07 | RNH1      | ribonuclease/angiogenin inhibitor 1                                                                        |
| 1,07 | VIP       | vasoactive intestinal peptide                                                                              |
| 1,07 | DCAF15    | DDB1 and CUL4 associated factor 15                                                                         |
| 1,07 | SLC1A3    | solute carrier family 1 (glial high affinity glutamate<br>transporter), member 3                           |
| 1,07 | HIST1H2BK | histone cluster 1, H2bk                                                                                    |
| 1,07 | RNF133    | ring finger protein 133                                                                                    |
| 1,07 | CDH5      | cadherin 5, type 2 (vascular endothelium)                                                                  |
| 1,07 | VHLL      | von Hippel-Lindau tumor suppressor-like                                                                    |
| 1,07 | CNTROB    | Transcript Identified by AceView, Entrez Gene ID(s)<br>116840                                              |
| 1,07 | SLC2A6    | solute carrier family 2 (facilitated glucose transporter),<br>member 6 [Source:HGNC Symbol;Acc:HGNC:11011] |
| 1,07 | SLC9A5    | solute carrier family 9, subfamily A (NHE5, cation<br>proton antiporter 5), member 5                       |
| 1,07 | OR4E2     | olfactory receptor, family 4, subfamily E, member 2                                                        |
| 1,07 | KRBOX1    | KRAB box domain containing 1                                                                               |
| 1,07 | NKG7      | natural killer cell granule protein 7                                                                      |
| 1,07 | SEC31A    | SEC31 homolog A, COPII coat complex component                                                              |
| 1,07 | ABCD2     | ATP binding cassette subfamily D member 2                                                                  |
| 1,07 | CACNA1D   | calcium channel, voltage-dependent, L type, alpha 1D<br>subunit                                            |
| 1,07 | RPUSD1    | RNA pseudouridylate synthase domain containing 1                                                           |
| 1,07 | TMEM38B   | transmembrane protein 38B                                                                                  |
| 1,07 | URAD      | ureidoimidazoline (2-oxo-4-hydroxy-4-carboxy-5-)<br>decarboxylase                                          |
| 1,07 | B3GALT5   | UDP-Gal:betaGlcNAc beta 1,3-galactosyltransferase 5                                                        |
| 1,07 | PRPF4     | pre-mRNA processing factor 4                                                                               |
| 1,07 | IL33      | interleukin 33                                                                                             |
| 1,07 | ASL       | argininosuccinate lyase                                                                                    |
| 1,07 | TRIM21    | tripartite motif containing 21                                                                             |
| 1,07 | CTDP1     | CTD phosphatase subunit 1                                                                                  |
| 1,07 | DOK5      | docking protein 5                                                                                          |
| 1,07 | ARFIP1    | ADP-ribosylation factor interacting protein 1                                                              |

|      |                     |                                                                                                                                                                                                                                       |
|------|---------------------|---------------------------------------------------------------------------------------------------------------------------------------------------------------------------------------------------------------------------------------|
| 1,07 | ZDHC12              | zinc finger, DHHC-type containing 12                                                                                                                                                                                                  |
| 1,07 | CTSC                | cathepsin C                                                                                                                                                                                                                           |
| 1,07 | MPO                 | Memczak2013 ANTISENSE, CDS, coding, INTERNAL best transcript NM_000250                                                                                                                                                                |
| 1,07 | NINJ1               | ninjurin 1                                                                                                                                                                                                                            |
| 1,07 | SERPINI2            | serpin peptidase inhibitor, clade I (pancpin), member 2                                                                                                                                                                               |
| 1,07 | DLL4                | delta-like 4 (Drosophila)                                                                                                                                                                                                             |
| 1,07 | HSCB                | HscB mitochondrial iron-sulfur cluster co-chaperone                                                                                                                                                                                   |
| 1,07 | OR2B6               | olfactory receptor, family 2, subfamily B, member 6                                                                                                                                                                                   |
| 1,07 | ZNF835              | Transcript Identified by AceView, Entrez Gene ID(s) 90485                                                                                                                                                                             |
| 1,07 | ENPP6               | ectonucleotide pyrophosphatase/phosphodiesterase 6                                                                                                                                                                                    |
| 1,07 | HNRNPH1             | heterogeneous nuclear ribonucleoprotein H1 (H)                                                                                                                                                                                        |
| 1,07 | MYL2                | myosin light chain 2                                                                                                                                                                                                                  |
| 1,07 | ZNF813              | zinc finger protein 813                                                                                                                                                                                                               |
| 1,07 | PLXNA2              | plexin A2                                                                                                                                                                                                                             |
| 1,07 | GFOD1               | glucose-fructose oxidoreductase domain containing 1                                                                                                                                                                                   |
| 1,07 | SYP                 | synaptophysin                                                                                                                                                                                                                         |
| 1,07 | SLC6A6              | solute carrier family 6 (neurotransmitter transporter), member 6                                                                                                                                                                      |
| 1,07 | KLK1                | kallikrein 1                                                                                                                                                                                                                          |
| 1,07 | FTCDNL1             | formiminotransferase cyclodeaminase N-terminal like                                                                                                                                                                                   |
| 1,07 | TM4SF19-AS1         | TM4SF19 antisense RNA 1                                                                                                                                                                                                               |
| 1,07 | VPS11               | VPS11, CORVET/HOPS core subunit [Source:HGNC Symbol;Acc:HGNC:14583]                                                                                                                                                                   |
| 1,07 | CALHM2              | calcium homeostasis modulator 2                                                                                                                                                                                                       |
| 1,07 | PLLP                | plasmolipin                                                                                                                                                                                                                           |
| 1,07 | TOPAZ1              | testis and ovary specific PAZ domain containing 1                                                                                                                                                                                     |
| 1,07 | CTC1                | CTS telomere maintenance complex component 1                                                                                                                                                                                          |
| 1,07 | LOC100505841        | zinc finger protein 474-like                                                                                                                                                                                                          |
| 1,07 | ZNF610              | zinc finger protein 610                                                                                                                                                                                                               |
| 1,07 | TMEM102             | transmembrane protein 102                                                                                                                                                                                                             |
| 1,07 | PIGU                | Salzman2013 ALT_ACCEPTOR, ALT_DONOR, coding, INTERNAL, intronic best transcript NM_080476                                                                                                                                             |
| 1,07 | TMEM37              | transmembrane protein 37                                                                                                                                                                                                              |
| 1,07 | CAPZA2              | capping protein (actin filament) muscle Z-line, alpha 2                                                                                                                                                                               |
| 1,07 | TBC1D19             | TBC1 domain family, member 19                                                                                                                                                                                                         |
| 1,07 | C11orf71            | chromosome 11 open reading frame 71                                                                                                                                                                                                   |
| 1,07 | OST4                | oligosaccharyltransferase complex subunit 4 (non-catalytic)                                                                                                                                                                           |
| 1,07 | DCAF8L2             | DDB1 and CUL4 associated factor 8-like 2                                                                                                                                                                                              |
| 1,07 | APEX2               | Transcript Identified by AceView, Entrez Gene ID(s) 27301                                                                                                                                                                             |
| 1,07 | LOC728395;<br>TSPY3 | Homo sapiens similar to testis specific protein, Y-linked 1, mRNA (cDNA clone MGC:150413 IMAGE:40120433), complete cds.; Homo sapiens testis specific protein, Y-linked 3, mRNA (cDNA clone MGC:150414 IMAGE:40120435), complete cds. |

|      |                     |                                                                                                        |
|------|---------------------|--------------------------------------------------------------------------------------------------------|
| 1,07 | BANP                | BTG3 associated nuclear protein                                                                        |
| 1,07 | OXSM                | 3-oxoacyl-ACP synthase, mitochondrial                                                                  |
| 1,07 | ADGRE3              | adhesion G protein-coupled receptor E3                                                                 |
| 1,07 | TP53TG3B            | TP53 target 3B                                                                                         |
| 1,07 | SMC6                | structural maintenance of chromosomes 6                                                                |
| 1,07 | LAMC3               | laminin, gamma 3                                                                                       |
| 1,07 | FRG1                | FSHD region gene 1                                                                                     |
| 1,07 | MBD3L4              | methyl-CpG binding domain protein 3-like 4                                                             |
| 1,07 | CLP1;<br>AP000662.4 | Transcript Identified by AceView, Entrez Gene ID(s)<br>10978; novel transcript, sense overlapping CLP1 |
| 1,07 | LGALS9B             | lectin, galactoside-binding, soluble, 9B                                                               |
| 1,07 | SULT1A2             | sulfotransferase family 1A member 2                                                                    |
| 1,07 | MPO                 | myeloperoxidase                                                                                        |
| 1,07 | ANKRD45             | ankyrin repeat domain 45                                                                               |
| 1,07 | ADH7                | alcohol dehydrogenase 7 (class IV), mu or sigma<br>polypeptide                                         |
| 1,07 | WDR75               | WD repeat domain 75                                                                                    |
| 1,07 | CCDC144NL           | coiled-coil domain containing 144 family, N-terminal<br>like                                           |
| 1,07 | TSNAXIP1            | translin-associated factor X interacting protein 1                                                     |
| 1,07 | FBXO15              | F-box protein 15                                                                                       |
| 1,07 | VDAC2               | voltage-dependent anion channel 2                                                                      |
| 1,07 | RBMXL3              | RNA binding motif protein, X-linked-like 3                                                             |
| 1,07 | MDM1                | Transcript Identified by AceView, Entrez Gene ID(s)<br>56890                                           |
| 1,07 | TBC1D3C             | TBC1 domain family, member 3C                                                                          |
| 1,07 | MARVELD1            | MARVEL domain containing 1                                                                             |
| 1,07 | SORD                | sorbitol dehydrogenase                                                                                 |
| 1,07 | LPCAT1              | Memczak2013 ANTISENSE, coding, INTERNAL,<br>intronic best transcript NM_024830                         |
| 1,07 | PDE1B               | phosphodiesterase 1B, calmodulin-dependent                                                             |
| 1,07 | CLYBL               | citrate lyase beta like                                                                                |
| 1,07 | RABIF               | RAB interacting factor                                                                                 |
| 1,07 | SPATA31E1           | SPATA31 subfamily E, member 1                                                                          |
| 1,07 | OAT                 | ornithine aminotransferase                                                                             |
| 1,07 | GPR149              | G protein-coupled receptor 149                                                                         |
| 1,07 | GCSH                | glycine cleavage system protein H (aminomethyl<br>carrier)                                             |
| 1,07 | ARHGAP40            | Rho GTPase activating protein 40                                                                       |
| 1,07 | FOXO6               | forkhead box O6                                                                                        |
| 1,07 | WASH1               | WAS protein family homolog 1                                                                           |
| 1,07 | NBN                 | nibrin                                                                                                 |
| 1,07 | IQCF6               | IQ motif containing F6                                                                                 |
| 1,07 | GLMP                | glycosylated lysosomal membrane protein                                                                |
| 1,07 | REXO4               | REX4 homolog, 3'-5' exonuclease [Source:HGNC<br>Symbol;Acc:HGNC:12820]                                 |
| 1,07 | PABPC1;<br>MIR7705  | poly(A) binding protein, cytoplasmic 1; microRNA<br>7705                                               |
| 1,07 | ST3GAL6             | ST3 beta-galactoside alpha-2,3-sialyltransferase 6                                                     |
| 1,07 | ARHGEF7             | Rho guanine nucleotide exchange factor 7                                                               |

|      |                             |                                                                                                           |
|------|-----------------------------|-----------------------------------------------------------------------------------------------------------|
| 1,07 | NLE1                        | notchless homolog 1 (Drosophila)                                                                          |
| 1,07 | MFSD2A                      | major facilitator superfamily domain containing 2A                                                        |
| 1,07 | MTHFD2L                     | methylenetetrahydrofolate dehydrogenase (NADP+ dependent) 2-like                                          |
| 1,07 | DNAJC11                     | DnaJ (Hsp40) homolog, subfamily C, member 11                                                              |
| 1,07 | RFPL2                       | ret finger protein-like 2                                                                                 |
| 1,07 | LOC401357;<br>RP13-580B18.4 | uncharacterized LOC401357; novel piRNA host transcript                                                    |
| 1,07 | SLC35A1                     | solute carrier family 35 (CMP-sialic acid transporter), member A1                                         |
| 1,07 | OR5B2                       | olfactory receptor, family 5, subfamily B, member 2                                                       |
| 1,07 | RIPPLY2                     | rippy transcriptional repressor 2                                                                         |
| 1,07 | SHQ1                        | SHQ1, H/ACA ribonucleoprotein assembly factor                                                             |
| 1,07 | C2orf61                     | chromosome 2 open reading frame 61                                                                        |
| 1,07 | AMN                         | amnion associated transmembrane protein                                                                   |
| 1,07 | CPSF7                       | cleavage and polyadenylation specific factor 7                                                            |
| 1,07 | RPS26                       | Homo sapiens ribosomal protein S26, mRNA (cDNA clone MGC:104291 IMAGE:4287636), complete cds.             |
| 1,07 | HTR1F                       | 5-hydroxytryptamine (serotonin) receptor 1F, G protein-coupled                                            |
| 1,07 | COX8A                       | cytochrome c oxidase subunit VIIIA (ubiquitous)                                                           |
| 1,07 | SEPHS2                      | selenophosphate synthetase 2                                                                              |
| 1,07 | BPGM                        | 2,3-bisphosphoglycerate mutase                                                                            |
| 1,07 | PARP6                       | poly(ADP-ribose) polymerase family member 6                                                               |
| 1,07 | ANKRD2                      | ankyrin repeat domain 2 (stretch responsive muscle)                                                       |
| 1,07 | FGFBP2                      | fibroblast growth factor binding protein 2                                                                |
| 1,07 | FBXW7                       | F-box and WD repeat domain containing 7, E3 ubiquitin protein ligase                                      |
| 1,07 | PPP2R1B                     | protein phosphatase 2, regulatory subunit A, beta                                                         |
| 1,07 | APOL2                       | apolipoprotein L, 2                                                                                       |
| 1,07 | CAPRIN2                     | caprin family member 2                                                                                    |
| 1,07 | MXRA8                       | matrix-remodelling associated 8                                                                           |
| 1,07 | MRPS18A                     | mitochondrial ribosomal protein S18A                                                                      |
| 1,07 | TBC1D3P1-DHX40P1            | TBC1D3P1-DHX40P1 readthrough transcribed pseudogene                                                       |
| 1,07 | LINC00654                   | long intergenic non-protein coding RNA 654                                                                |
| 1,07 | PPFIA3                      | protein tyrosine phosphatase, receptor type, f polypeptide (PTPRF), interacting protein (liprin), alpha 3 |
| 1,07 | UBE2Q2L                     | ubiquitin conjugating enzyme E2Q family member 2-like                                                     |
| 1,07 | RPS6KA1                     | ribosomal protein S6 kinase, 90kDa, polypeptide 1                                                         |
| 1,07 | SLC38A5                     | solute carrier family 38, member 5                                                                        |
| 1,07 | CD81                        | CD81 molecule                                                                                             |
| 1,07 | RWDD2B                      | RWD domain containing 2B                                                                                  |
| 1,07 | STAG3L3;<br>STAG3L2         | stromal antigen 3-like 3 (pseudogene); stromal antigen 3-like 2 (pseudogene)                              |
| 1,07 | MUC22                       | mucin 22                                                                                                  |
| 1,07 | MYH2                        | myosin, heavy chain 2, skeletal muscle, adult                                                             |
| 1,07 | MT1E                        | metallothionein 1E                                                                                        |

|      |                                        |                                                                                                                                                                                 |
|------|----------------------------------------|---------------------------------------------------------------------------------------------------------------------------------------------------------------------------------|
| 1,07 | CCP110                                 | centriolar coiled coil protein 110kDa                                                                                                                                           |
| 1,07 | ETF1                                   | eukaryotic translation termination factor 1                                                                                                                                     |
| 1,07 | ERBB2IP                                | erbb2 interacting protein                                                                                                                                                       |
| 1,07 | GABRP                                  | gamma-aminobutyric acid (GABA) A receptor, pi                                                                                                                                   |
| 1,07 | IGSF22                                 | immunoglobulin superfamily, member 22                                                                                                                                           |
| 1,07 | CMTR2                                  | cap methyltransferase 2                                                                                                                                                         |
| 1,07 | MLH3                                   | mutL homolog 3                                                                                                                                                                  |
| 1,07 | IMPAD1                                 | inositol monophosphatase domain containing 1                                                                                                                                    |
| 1,07 | CRY1                                   | cryptochrome circadian clock 1                                                                                                                                                  |
| 1,07 | NDUFS8;<br>MIR4691;<br>MIR7113         | NADH dehydrogenase (ubiquinone) Fe-S protein 8,<br>23kDa (NADH-coenzyme Q reductase); microRNA<br>4691; microRNA 7113                                                           |
| 1,07 | ZNF280C                                | zinc finger protein 280C                                                                                                                                                        |
| 1,07 | DUX4L8                                 | double homeobox 4 like 8                                                                                                                                                        |
| 1,07 | GPR176                                 | G protein-coupled receptor 176                                                                                                                                                  |
| 1,07 | LMBR1                                  | Transcript Identified by AceView, Entrez Gene ID(s)<br>64327                                                                                                                    |
| 1,07 | PPTC7                                  | PTC7 protein phosphatase homolog                                                                                                                                                |
| 1,07 | SNAP91                                 | synaptosome associated protein 91kDa                                                                                                                                            |
| 1,07 | SOWAHD                                 | sosondowah ankyrin repeat domain family member D                                                                                                                                |
| 1,07 | PSMC3IP                                | PSMC3 interacting protein                                                                                                                                                       |
| 1,07 | TCF4                                   | transcription factor 4                                                                                                                                                          |
| 1,07 | CASP6                                  | caspase 6                                                                                                                                                                       |
| 1,07 | TUBA4A                                 | tubulin, alpha 4a                                                                                                                                                               |
| 1,07 | OR13C8                                 | olfactory receptor, family 13, subfamily C, member 8                                                                                                                            |
| 1,07 | BAGE; BAGE4;<br>BAGE3; BAGE2;<br>BAGE5 | B melanoma antigen; B melanoma antigen family,<br>member 4; B melanoma antigen family, member 3; B<br>melanoma antigen family, member 2; B melanoma<br>antigen family, member 5 |
| 1,07 | ADAMTS13                               | ADAM metalloproteinase with thrombospondin type 1<br>motif 13                                                                                                                   |
| 1,07 | CNTN2                                  | contactin 2 (axonal)                                                                                                                                                            |
| 1,07 | SMARCD3                                | SWI/SNF related, matrix associated, actin dependent<br>regulator of chromatin, subfamily d, member 3                                                                            |
| 1,07 | CCDC9                                  | coiled-coil domain containing 9                                                                                                                                                 |
| 1,07 | IZUMO2                                 | IZUMO family member 2                                                                                                                                                           |
| 1,07 | VDR                                    | vitamin D (1,25- dihydroxyvitamin D3) receptor                                                                                                                                  |
| 1,07 | METTL7A                                | methyltransferase like 7A                                                                                                                                                       |
| 1,07 | DUX4L24;<br>DUX4L23                    | double homeobox 4 like 24; double homeobox 4 like 23                                                                                                                            |
| 1,07 | DUX4L22;<br>DUX4L21                    | double homeobox 4 like 22; double homeobox 4 like 21                                                                                                                            |
| 1,07 | DUX4L10;<br>DUX4L11                    | double homeobox 4 like 10; double homeobox 4 like 11                                                                                                                            |
| 1,07 | NUDT3                                  | nudix hydrolase 3                                                                                                                                                               |
| 1,07 | KCNE5; ACSL4                           | potassium channel, voltage gated subfamily E<br>regulatory beta subunit 5; acyl-CoA synthetase long-<br>chain family member 4                                                   |
| 1,07 | PKP3                                   | plakophilin 3                                                                                                                                                                   |
| 1,07 | CLN3; NPIP7                            | ceroid-lipofuscinosis, neuronal 3; nuclear pore complex<br>interacting protein family, member B7                                                                                |

|      |                                |                                                                                           |
|------|--------------------------------|-------------------------------------------------------------------------------------------|
| 1,07 | FRS2                           | fibroblast growth factor receptor substrate 2                                             |
| 1,07 | PYHIN1                         | pyrin and HIN domain family, member 1                                                     |
| 1,07 | ARL6IP6                        | ADP-ribosylation factor like GTPase 6 interacting protein 6                               |
| 1,07 | HDC                            | histidine decarboxylase                                                                   |
| 1,07 | NKX2-2                         | NK2 homeobox 2                                                                            |
| 1,07 | KCTD16                         | potassium channel tetramerization domain containing 16                                    |
| 1,07 | CHST11                         | Transcript Identified by AceView, Entrez Gene ID(s) 50515                                 |
| 1,07 | RICTOR                         | Memczak2013 ANTISENSE, coding, INTERNAL, intronic best transcript NM_152756               |
| 1,07 | IFI16                          | interferon, gamma-inducible protein 16                                                    |
| 1,07 | ATG16L1                        | autophagy related 16-like 1                                                               |
| 1,07 | POMT1                          | protein-O-mannosyltransferase 1                                                           |
| 1,07 | IRS2                           | insulin receptor substrate 2                                                              |
| 1,07 | PNRC1                          | proline-rich nuclear receptor coactivator 1                                               |
| 1,07 | C16orf70                       | chromosome 16 open reading frame 70                                                       |
| 1,07 | PRAMEF25;<br>PRAMEF26          | PRAME family member 25; PRAME family member 26                                            |
| 1,07 | PES1                           | pescadillo ribosomal biogenesis factor 1                                                  |
| 1,07 | FAM45A                         | family with sequence similarity 45, member A                                              |
| 1,07 | CNP                            | Memczak2013 ANTISENSE, CDS, coding, INTERNAL best transcript NM_033133                    |
| 1,07 | RSPH10B2                       | radial spoke head 10 homolog B2 (Chlamydomonas)                                           |
| 1,07 | CES1P1; CES1                   | carboxylesterase 1 pseudogene 1; carboxylesterase 1                                       |
| 1,07 | CTSB                           | Jeck2013 ALT_DONOR, coding, INTERNAL, intronic best transcript NM_147780                  |
| 1,07 | ODC1;<br>SNORA80B              | ornithine decarboxylase 1; small nucleolar RNA, H/ACA box 80B                             |
| 1,07 | CAPN14                         | calpain 14                                                                                |
| 1,07 | SERINC3                        | serine incorporator 3                                                                     |
| 1,07 | GRIK5                          | glutamate receptor, ionotropic, kainate 5                                                 |
| 1,07 | DUX4                           | double homeobox 4                                                                         |
| 1,07 | F8A3                           | coagulation factor VIII-associated 3                                                      |
| 1,07 | USP17L22                       | ubiquitin specific peptidase 17-like family member 22                                     |
| 1,07 | CSNK1D                         | casein kinase 1, delta                                                                    |
| 1,07 | COL28A1                        | collagen, type XXVIII, alpha 1                                                            |
| 1,07 | PSMD1                          | proteasome 26S subunit, non-ATPase 1                                                      |
| 1,07 | PAQR3                          | progesterin and adipoQ receptor family member III                                         |
| 1,07 | LOC101928093;<br>RP11-779O18.1 | uncharacterized LOC101928093; novel transcript                                            |
| 1,07 | LURAP1                         | leucine rich adaptor protein 1                                                            |
| 1,07 | PPP1R14A                       | protein phosphatase 1, regulatory (inhibitor) subunit 14A                                 |
| 1,07 | ZDHHC7                         | zinc finger, DHHC-type containing 7                                                       |
| 1,07 | LZTS2                          | leucine zipper, putative tumor suppressor 2                                               |
| 1,07 | DENND3                         | Memczak2013 ALT_ACCEPTOR, ALT_DONOR, coding, INTERNAL, intronic best transcript NM_014957 |

|      |                |                                                                                                 |
|------|----------------|-------------------------------------------------------------------------------------------------|
| 1,07 | CD70           | CD70 molecule                                                                                   |
| 1,07 | RRP12          | ribosomal RNA processing 12 homolog                                                             |
| 1,07 | SLC25A34       | solute carrier family 25, member 34                                                             |
| 1,07 | ADAMTS17       | Memczak2013 ANTISENSE, coding, INTERNAL, intronic best transcript NM_139057                     |
| 1,07 | C4orf19        | chromosome 4 open reading frame 19                                                              |
| 1,07 | FNDC5          | fibronectin type III domain containing 5                                                        |
| 1,07 | ZBED5          | zinc finger, BED-type containing 5                                                              |
| 1,07 | HIST1H2BF      | histone cluster 1, H2bf                                                                         |
| 1,07 | C20orf144      | chromosome 20 open reading frame 144                                                            |
| 1,07 | ABCE1          | ATP binding cassette subfamily E member 1                                                       |
| 1,07 | KIAA1586       | KIAA1586                                                                                        |
| 1,07 | OR6B1          | olfactory receptor, family 6, subfamily B, member 1                                             |
| 1,07 | DIRAS3         | DIRAS family, GTP-binding RAS-like 3                                                            |
| 1,07 | ZNF252P-AS1    | ZNF252P antisense RNA 1                                                                         |
| 1,07 | CDH10          | cadherin 10, type 2 (T2-cadherin)                                                               |
| 1,07 | UCP3           | uncoupling protein 3 (mitochondrial, proton carrier)                                            |
| 1,07 | HDAC4          | histone deacetylase 4                                                                           |
| 1,07 | SLC39A11       | solute carrier family 39, member 11                                                             |
| 1,07 | LINC01189      | long intergenic non-protein coding RNA 1189                                                     |
| 1,07 | KCNT2          | potassium channel, sodium activated subfamily T, member 2                                       |
| 1,07 | INIP           | INTS3 and NABP interacting protein                                                              |
| 1,07 | BOP1; MIR7112  | block of proliferation 1; microRNA 7112                                                         |
| 1,07 | ZNF468         | zinc finger protein 468                                                                         |
| 1,07 | RAC1           | ras-related C3 botulinum toxin substrate 1 (rho family, small GTP binding protein Rac1)         |
| 1,07 | CCDC92         | coiled-coil domain containing 92                                                                |
| 1,07 | KDR            | kinase insert domain receptor                                                                   |
| 1,07 | CLMP           | CXADR-like membrane protein                                                                     |
| 1,07 | CDKN2B         | cyclin-dependent kinase inhibitor 2B (p15, inhibits CDK4)                                       |
| 1,07 | POTEC          | POTE ankyrin domain family, member C                                                            |
| 1,07 | FAM76A         | family with sequence similarity 76, member A                                                    |
| 1,07 | METTL21C       | methyltransferase like 21C                                                                      |
| 1,07 | PACS2          | phosphofurin acidic cluster sorting protein 2                                                   |
| 1,07 | SPHKAP         | SPHK1 interactor, AKAP domain containing                                                        |
| 1,07 | MEF2D          | myocyte enhancer factor 2D                                                                      |
| 1,07 | MBL1P; BMS1P21 | mannose-binding lectin (protein A) 1, pseudogene; BMS1 ribosome biogenesis factor pseudogene 21 |
| 1,07 | ASPSCR1        | alveolar soft part sarcoma chromosome region, candidate 1                                       |
| 1,07 | TLR1           | toll-like receptor 1                                                                            |
| 1,07 | JAKMIP2        | janus kinase and microtubule interacting protein 2                                              |
| 1,07 | TRIM13; KCNRG  | tripartite motif containing 13; potassium channel regulator                                     |
| 1,07 | TRIM3          | tripartite motif containing 3                                                                   |
| 1,07 | SCAMP1         | secretory carrier membrane protein 1                                                            |

|      |                                       |                                                                                                                                                                       |
|------|---------------------------------------|-----------------------------------------------------------------------------------------------------------------------------------------------------------------------|
| 1,07 | LOC79999;<br>LOC388436;<br>AC007952.6 | Homo sapiens uncharacterized LOC79999 (LOC79999), mRNA.; Homo sapiens uncharacterized protein ENSP00000382042 (LOC388436), mRNA.; novel transcript antisense to GRAPL |
| 1,07 | PTPN12                                | protein tyrosine phosphatase, non-receptor type 12                                                                                                                    |
| 1,07 | CSTF2T                                | cleavage stimulation factor, 3 pre-RNA, subunit 2, tau variant                                                                                                        |
| 1,07 | STAG3                                 | stromal antigen 3                                                                                                                                                     |
| 1,07 | ZNF205                                | zinc finger protein 205                                                                                                                                               |
| 1,07 | FABP9                                 | fatty acid binding protein 9, testis                                                                                                                                  |
| 1,07 | NTM                                   | neurotrimin                                                                                                                                                           |
| 1,07 | C1orf229                              | chromosome 1 open reading frame 229                                                                                                                                   |
| 1,07 | ZNF331                                | zinc finger protein 331                                                                                                                                               |
| 1,07 | LONP1                                 | Transcript Identified by AceView, Entrez Gene ID(s) 9361                                                                                                              |
| 1,07 | PTPN23                                | protein tyrosine phosphatase, non-receptor type 23                                                                                                                    |
| 1,07 | KERA                                  | keratocan                                                                                                                                                             |
| 1,07 | IMP4                                  | IMP4 homolog, U3 small nucleolar ribonucleoprotein                                                                                                                    |
| 1,07 | WDR62                                 | WD repeat domain 62                                                                                                                                                   |
| 1,07 | ANGPTL6                               | angiopoietin like 6                                                                                                                                                   |
| 1,07 | ZADH2                                 | zinc binding alcohol dehydrogenase domain containing 2                                                                                                                |
| 1,07 | CCL11                                 | chemokine (C-C motif) ligand 11                                                                                                                                       |
| 1,07 | PROX1                                 | prospero homeobox 1                                                                                                                                                   |
| 1,07 | ZNF717                                | zinc finger protein 717                                                                                                                                               |
| 1,07 | ZNF280A                               | zinc finger protein 280A                                                                                                                                              |
| 1,07 | KCNMA1                                | Jeck2013 ALT_ACCEPTOR, ALT_DONOR, coding, INTERNAL, intronic best transcript NM_001014797                                                                             |
| 1,07 | KLHDC8A                               | kelch domain containing 8A                                                                                                                                            |
| 1,07 | EFTUD2                                | elongation factor Tu GTP binding domain containing 2                                                                                                                  |
| 1,07 | ZNF782                                | zinc finger protein 782                                                                                                                                               |
| 1,07 | SSBP1                                 | single-stranded DNA binding protein 1, mitochondrial                                                                                                                  |
| 1,07 | ZNF157                                | zinc finger protein 157                                                                                                                                               |
| 1,07 | DBP                                   | D site of albumin promoter (albumin D-box) binding protein                                                                                                            |
| 1,07 | SCN2B                                 | sodium channel, voltage gated, type II beta subunit                                                                                                                   |
| 1,07 | DEFB104A;<br>DEFB104B                 | defensin, beta 104A; defensin, beta 104B                                                                                                                              |
| 1,07 | GPA33                                 | glycoprotein A33 (transmembrane)                                                                                                                                      |
| 1,07 | PIBF1                                 | progesterone immunomodulatory binding factor 1                                                                                                                        |
| 1,07 | FIG4                                  | FIG4 phosphoinositide 5-phosphatase                                                                                                                                   |
| 1,07 | PAK1IP1                               | PAK1 interacting protein 1                                                                                                                                            |
| 1,07 | EPGN                                  | epithelial mitogen                                                                                                                                                    |
| 1,07 | ZIC5                                  | Zic family member 5                                                                                                                                                   |
| 1,07 | OR10G2                                | olfactory receptor, family 10, subfamily G, member 2                                                                                                                  |
| 1,07 | C1QTNF2                               | C1q and tumor necrosis factor related protein 2                                                                                                                       |
| 1,07 | EIF3L                                 | eukaryotic translation initiation factor 3, subunit L                                                                                                                 |
| 1,07 | CYB5R3                                | cytochrome b5 reductase 3                                                                                                                                             |
| 1,07 | RFPL4B                                | ret finger protein-like 4B                                                                                                                                            |

|      |                                           |                                                                                                         |
|------|-------------------------------------------|---------------------------------------------------------------------------------------------------------|
| 1,07 | ACTR3                                     | ARP3 actin-related protein 3 homolog (yeast)                                                            |
| 1,07 | LOC100631378;<br>AC016582.2;<br>LOC728853 | uncharacterized 100631378; Transcript Identified by AceView, Entrez Gene ID(s) 728853; novel transcript |
| 1,07 | TMEM234                                   | transmembrane protein 234                                                                               |
| 1,07 | CEP131                                    | centrosomal protein 131kDa                                                                              |
| 1,07 | XK                                        | X-linked Kx blood group                                                                                 |
| 1,07 | GJD2                                      | gap junction protein delta 2                                                                            |
| 1,07 | CHAMP1                                    | chromosome alignment maintaining phosphoprotein 1                                                       |
| 1,07 | KIRREL3                                   | Jeck2013 ALT_ACCEPTOR, ALT_DONOR, coding, INTERNAL, intronic best transcript NM_032531                  |
| 1,07 | SOX18                                     | SRY box 18                                                                                              |
| 1,07 | NDUFA12                                   | NADH dehydrogenase (ubiquinone) 1 alpha subcomplex, 12                                                  |
| 1,07 | RHD                                       | Rh blood group, D antigen                                                                               |
| 1,07 | HERC3                                     | HECT and RLD domain containing E3 ubiquitin protein ligase 3                                            |
| 1,07 | FAM126A                                   | family with sequence similarity 126, member A                                                           |
| 1,07 | BATF2                                     | basic leucine zipper transcription factor, ATF-like 2                                                   |
| 1,07 | AREL1                                     | apoptosis resistant E3 ubiquitin protein ligase 1                                                       |
| 1,07 | KIF3C                                     | kinesin family member 3C                                                                                |
| 1,07 | ZNF365                                    | zinc finger protein 365                                                                                 |
| 1,07 | ZNF629                                    | zinc finger protein 629                                                                                 |
| 1,07 | KRT15; MIR6510                            | keratin 15, type I; microRNA 6510                                                                       |
| 1,07 | PPP2R3C                                   | protein phosphatase 2, regulatory subunit B, gamma                                                      |
| 1,07 | PSORS1C1                                  | psoriasis susceptibility 1 candidate 1                                                                  |
| 1,07 | CNTNAP4                                   | contactin associated protein-like 4                                                                     |
| 1,07 | WIZ                                       | widely interspaced zinc finger motifs                                                                   |
| 1,07 | PTPN4                                     | protein tyrosine phosphatase, non-receptor type 4 (megakaryocyte)                                       |
| 1,07 | RAB11A                                    | RAB11A, member RAS oncogene family                                                                      |
| 1,07 | KHDRBS3                                   | KH domain containing, RNA binding, signal transduction associated 3                                     |
| 1,07 | LINC00483                                 | long intergenic non-protein coding RNA 483                                                              |
| 1,07 | BTN1A1                                    | butyrophilin, subfamily 1, member A1                                                                    |
| 1,07 | VSIG1                                     | V-set and immunoglobulin domain containing 1                                                            |
| 1,07 | KLHL18                                    | kelch-like family member 18                                                                             |
| 1,07 | ZNF473                                    | zinc finger protein 473                                                                                 |
| 1,07 | ATF7; NPFF                                | activating transcription factor 7; neuropeptide FF-amide peptide precursor                              |
| 1,07 | CFAP45                                    | cilia and flagella associated protein 45                                                                |
| 1,07 | ARL17B                                    | ADP-ribosylation factor like GTPase 17B                                                                 |
| 1,07 | RTN4IP1                                   | reticulon 4 interacting protein 1                                                                       |
| 1,07 | FAM101A                                   | family with sequence similarity 101, member A                                                           |
| 1,07 | KIAA0355                                  | KIAA0355                                                                                                |
| 1,07 | GNPNAT1                                   | glucosamine-phosphate N-acetyltransferase 1                                                             |
| 1,07 | TRPM1                                     | transient receptor potential cation channel, subfamily M, member 1                                      |
| 1,07 | METTL5                                    | methyltransferase like 5                                                                                |
| 1,07 | SPTLC1                                    | serine palmitoyltransferase, long chain base subunit 1                                                  |

|      |                                   |                                                                                                                  |
|------|-----------------------------------|------------------------------------------------------------------------------------------------------------------|
| 1,07 | TRNP1                             | TMF1-regulated nuclear protein 1                                                                                 |
| 1,07 | ZDHHC6                            | zinc finger, DHHC-type containing 6                                                                              |
| 1,07 | NYAP2                             | neuronal tyrosine-phosphorylated phosphoinositide-3-kinase adaptor 2                                             |
| 1,07 | TM2D1                             | Transcript Identified by AceView, Entrez Gene ID(s) 83941                                                        |
| 1,07 | CCDC64B                           | coiled-coil domain containing 64B                                                                                |
| 1,07 | PRSS50                            | protease, serine 50                                                                                              |
| 1,07 | GPR101                            | G protein-coupled receptor 101                                                                                   |
| 1,07 | INSL3                             | insulin-like 3 (Leydig cell)                                                                                     |
| 1,07 | API5                              | apoptosis inhibitor 5                                                                                            |
| 1,07 | C9orf106                          | chromosome 9 open reading frame 106                                                                              |
| 1,07 | POC5                              | POC5 centriolar protein                                                                                          |
| 1,07 | BABAM1                            | Zhang2013 ALT_ACCEPTOR, ALT_DONOR, coding, INTERNAL, intronic best transcript NM_001033549                       |
| 1,07 | NOTCH4                            | notch 4                                                                                                          |
| 1,07 | EDEM1                             | ER degradation enhancer, mannosidase alpha-like 1                                                                |
| 1,07 | SLC19A1                           | solute carrier family 19 (folate transporter), member 1                                                          |
| 1,07 | YTHDF3                            | YTH N(6)-methyladenosine RNA binding protein 3                                                                   |
| 1,07 | NRP2                              | neuropilin 2                                                                                                     |
| 1,07 | NXPH2                             | neurexophilin 2                                                                                                  |
| 1,07 | NDUFA6                            | NADH dehydrogenase (ubiquinone) 1 alpha subcomplex, 6, 14kDa                                                     |
| 1,07 | GNG7                              | guanine nucleotide binding protein (G protein), gamma 7                                                          |
| 1,07 | RBM39                             | RNA binding motif protein 39                                                                                     |
| 1,07 | MAML3                             | mastermind-like transcriptional coactivator 3                                                                    |
| 1,07 | MAP3K7CL                          | MAP3K7 C-terminal like                                                                                           |
| 1,07 | U2AF1L4                           | U2 small nuclear RNA auxiliary factor 1-like 4                                                                   |
| 1,07 | TBC1D9                            | TBC1 domain family, member 9 (with GRAM domain)                                                                  |
| 1,07 | ACYP2                             | acylphosphatase 2, muscle type                                                                                   |
| 1,07 | CDCA3                             | cell division cycle associated 3                                                                                 |
| 1,07 | GTF2H2C_2;<br>GTF2H2C;<br>GTF2H2B | GTF2H2 family member C, copy 2; GTF2H2 family member C; general transcription factor IIH subunit 2B (pseudogene) |
| 1,07 | SEZ6                              | seizure related 6 homolog (mouse)                                                                                |
| 1,07 | OR4F21                            | olfactory receptor, family 4, subfamily F, member 21                                                             |
| 1,07 | KRTAP1-4                          | keratin associated protein 1-4                                                                                   |
| 1,07 | COL27A1                           | collagen, type XXVII, alpha 1                                                                                    |
| 1,07 | PPIAL4F                           | peptidylprolyl isomerase A (cyclophilin A)-like 4F                                                               |
| 1,07 | WISP3                             | WNT1 inducible signaling pathway protein 3                                                                       |
| 1,07 | MUC3A                             | mucin 3A, cell surface associated                                                                                |
| 1,07 | HADHB                             | hydroxyacyl-CoA dehydrogenase/3-ketoacyl-CoA thiolase/enoyl-CoA hydratase (trifunctional protein), beta subunit  |
| 1,07 | BTNL8                             | butyrophilin-like 8                                                                                              |
| 1,07 | IFI35                             | interferon-induced protein 35                                                                                    |
| 1,07 | TUBA1A                            | tubulin, alpha 1a                                                                                                |

|      |                                                                         |                                                                                                                                                                                                                                                                                                                                                                                                                                                                     |
|------|-------------------------------------------------------------------------|---------------------------------------------------------------------------------------------------------------------------------------------------------------------------------------------------------------------------------------------------------------------------------------------------------------------------------------------------------------------------------------------------------------------------------------------------------------------|
| 1,07 | MAPK10                                                                  | mitogen-activated protein kinase 10                                                                                                                                                                                                                                                                                                                                                                                                                                 |
| 1,07 | PSMC4                                                                   | proteasome 26S subunit, ATPase 4 [Source:HGNC Symbol;Acc:HGNC:9551]                                                                                                                                                                                                                                                                                                                                                                                                 |
| 1,07 | SNRNP35                                                                 | small nuclear ribonucleoprotein, U11/U12 35kDa subunit                                                                                                                                                                                                                                                                                                                                                                                                              |
| 1,07 | APOO                                                                    | apolipoprotein O                                                                                                                                                                                                                                                                                                                                                                                                                                                    |
| 1,07 | SIN3B                                                                   | SIN3 transcription regulator family member B                                                                                                                                                                                                                                                                                                                                                                                                                        |
| 1,07 | ETNPPL                                                                  | ethanolamine-phosphate phospho-lyase                                                                                                                                                                                                                                                                                                                                                                                                                                |
| 1,07 | KRTAP4-5                                                                | keratin associated protein 4-5                                                                                                                                                                                                                                                                                                                                                                                                                                      |
| 1,07 | DMD                                                                     | dystrophin                                                                                                                                                                                                                                                                                                                                                                                                                                                          |
| 1,07 | PI4K2A                                                                  | phosphatidylinositol 4-kinase type 2 alpha                                                                                                                                                                                                                                                                                                                                                                                                                          |
| 1,07 | TMPRSS11F                                                               | transmembrane protease, serine 11F                                                                                                                                                                                                                                                                                                                                                                                                                                  |
| 1,07 | TBC1D3H;<br>TBC1D3G;<br>TBC1D3I;<br>LOC101060389;<br>TBC1D3C;<br>TBC1D3 | Homo sapiens TBC1 domain family, member 3H (TBC1D3H), mRNA.; Homo sapiens TBC1 domain family, member 3G (TBC1D3G), mRNA.; Homo sapiens TBC1 domain family, member 3I (TBC1D3I), mRNA.; Homo sapiens TBC1 domain family member-like (LOC101060389), mRNA.; Homo sapiens TBC1 domain family, member 3C, mRNA (cDNA clone MGC:87891 IMAGE:5165385), complete cds.; Homo sapiens TBC1 domain family, member 3, mRNA (cDNA clone MGC:87893 IMAGE:5742850), complete cds. |
| 1,07 | ANAPC4                                                                  | anaphase promoting complex subunit 4                                                                                                                                                                                                                                                                                                                                                                                                                                |
| 1,07 | MMP26                                                                   | matrix metalloproteinase 26                                                                                                                                                                                                                                                                                                                                                                                                                                         |
| 1,07 | TRIM62                                                                  | tripartite motif containing 62                                                                                                                                                                                                                                                                                                                                                                                                                                      |
| 1,07 | DUX4L14;<br>DUX4L15                                                     | double homeobox 4 like 14; double homeobox 4 like 15                                                                                                                                                                                                                                                                                                                                                                                                                |
| 1,07 | RLBP1                                                                   | retinaldehyde binding protein 1                                                                                                                                                                                                                                                                                                                                                                                                                                     |
| 1,07 | VILL                                                                    | villin-like                                                                                                                                                                                                                                                                                                                                                                                                                                                         |
| 1,07 | CACFD1                                                                  | calcium channel flower domain containing 1                                                                                                                                                                                                                                                                                                                                                                                                                          |
| 1,07 | ZNF197                                                                  | zinc finger protein 197                                                                                                                                                                                                                                                                                                                                                                                                                                             |
| 1,07 | CHRFAM7A                                                                | CHRNA7 (cholinergic receptor, nicotinic, alpha 7, exons 5-10) and FAM7A (family with sequence similarity 7A, exons A-E) fusion                                                                                                                                                                                                                                                                                                                                      |
| 1,07 | OR5D18                                                                  | olfactory receptor, family 5, subfamily D, member 18                                                                                                                                                                                                                                                                                                                                                                                                                |
| 1,07 | CHKB                                                                    | choline kinase beta                                                                                                                                                                                                                                                                                                                                                                                                                                                 |
| 1,07 | THBS3                                                                   | Salzman2013 ALT_ACCEPTOR, ALT_DONOR, coding, INTERNAL, intronic best transcript NM_007112                                                                                                                                                                                                                                                                                                                                                                           |
| 1,07 | PHF21A                                                                  | PHD finger protein 21A                                                                                                                                                                                                                                                                                                                                                                                                                                              |
| 1,07 | FAM206A                                                                 | family with sequence similarity 206, member A                                                                                                                                                                                                                                                                                                                                                                                                                       |
| 1,07 | LSM12                                                                   | Homo sapiens LSM12 homolog (S. cerevisiae), mRNA (cDNA clone MGC:57206 IMAGE:4794614), complete cds.                                                                                                                                                                                                                                                                                                                                                                |
| 1,07 | FIGNL2                                                                  | fidgetin-like 2                                                                                                                                                                                                                                                                                                                                                                                                                                                     |
| 1,07 | AGFG2                                                                   | ArfGAP with FG repeats 2                                                                                                                                                                                                                                                                                                                                                                                                                                            |
| 1,07 | MRC1                                                                    | mannose receptor, C type 1                                                                                                                                                                                                                                                                                                                                                                                                                                          |
| 1,07 | TM7SF2                                                                  | transmembrane 7 superfamily member 2                                                                                                                                                                                                                                                                                                                                                                                                                                |
| 1,07 | S100PBP                                                                 | S100P binding protein                                                                                                                                                                                                                                                                                                                                                                                                                                               |
| 1,07 | BANF2                                                                   | barrier to autointegration factor 2                                                                                                                                                                                                                                                                                                                                                                                                                                 |

|      |                          |                                                                                                                     |
|------|--------------------------|---------------------------------------------------------------------------------------------------------------------|
| 1,07 | MEIKIN                   | meiotic kinetochore factor                                                                                          |
| 1,07 | LILRB4                   | leukocyte immunoglobulin-like receptor, subfamily B (with TM and ITIM domains), member 4                            |
| 1,07 | SLC25A25                 | Zhang2013 ALT_ACCEPTOR, ALT_DONOR, coding, INTERNAL, intronic best transcript NM_001006641                          |
| 1,07 | CXCR1                    | chemokine (C-X-C motif) receptor 1                                                                                  |
| 1,07 | CEACAM19                 | carcinoembryonic antigen-related cell adhesion molecule 19                                                          |
| 1,07 | SPAG17                   | sperm associated antigen 17                                                                                         |
| 1,07 | GNPAT                    | glyceronephosphate O-acyltransferase                                                                                |
| 1,07 | CYP2R1                   | cytochrome P450, family 2, subfamily R, polypeptide 1                                                               |
| 1,07 | TLR6                     | toll-like receptor 6                                                                                                |
| 1,07 | LY6E                     | lymphocyte antigen 6 complex, locus E                                                                               |
| 1,07 | HAO1                     | hydroxyacid oxidase (glycolate oxidase) 1                                                                           |
| 1,07 | CLDN9                    | claudin 9                                                                                                           |
| 1,07 | KRTAP4-6                 | keratin associated protein 4-6                                                                                      |
| 1,07 | PRG4                     | proteoglycan 4                                                                                                      |
| 1,07 | RHOF                     | ras homolog family member F (in filopodia)                                                                          |
| 1,07 | SHB                      | Src homology 2 domain containing adaptor protein B                                                                  |
| 1,07 | KIF15                    | kinesin family member 15                                                                                            |
| 1,07 | TMEM216                  | transmembrane protein 216                                                                                           |
| 1,07 | TMEM173                  | transmembrane protein 173                                                                                           |
| 1,07 | GSTM1                    | glutathione S-transferase mu 1                                                                                      |
| 1,07 | SEMA3C                   | sema domain, immunoglobulin domain (Ig), short basic domain, secreted, (semaphorin) 3C                              |
| 1,07 | SNX29P2;<br>SNX29P1      | sorting nexin 29 pseudogene 2; sorting nexin 29 pseudogene 1                                                        |
| 1,07 | LOC200726;<br>AC010731.4 | hCG1657980; Transcript Identified by AceView, Entrez Gene ID(s) 200726, RefSeq ID(s) NM_001102659; novel transcript |
| 1,07 | SP110                    | SP110 nuclear body protein                                                                                          |
| 1,07 | SNRPA                    | small nuclear ribonucleoprotein polypeptide A                                                                       |
| 1,07 | HIGD2A                   | HIG1 hypoxia inducible domain family, member 2A                                                                     |
| 1,07 | KLHL23                   | kelch-like family member 23                                                                                         |
| 1,07 | HS6ST2                   | heparan sulfate 6-O-sulfotransferase 2                                                                              |
| 1,07 | FBXO30                   | F-box protein 30                                                                                                    |
| 1,07 | SCML4                    | sex comb on midleg-like 4 (Drosophila)                                                                              |
| 1,07 | EYA1                     | EYA transcriptional coactivator and phosphatase 1                                                                   |
| 1,07 | DCP1B                    | decapping mRNA 1B                                                                                                   |
| 1,07 | IL36RN                   | interleukin 36 receptor antagonist                                                                                  |
| 1,07 | RPF2                     | ribosome production factor 2 homolog                                                                                |
| 1,07 | CDR1                     | cerebellar degeneration related protein 1                                                                           |
| 1,07 | MIR670HG;<br>HSD17B12    | MIR670 host gene; hydroxysteroid (17-beta) dehydrogenase 12                                                         |
| 1,07 | CCDC25                   | coiled-coil domain containing 25                                                                                    |
| 1,07 | NUPL2                    | nucleoporin like 2                                                                                                  |
| 1,07 | NISCH                    | Zhang2013 ALT_DONOR, coding, INTERNAL, intronic best transcript NM_007184                                           |

|      |                               |                                                                                           |
|------|-------------------------------|-------------------------------------------------------------------------------------------|
| 1,07 | TAF8                          | TATA box binding protein associated factor 8                                              |
| 1,07 | C20orf166-AS1                 | C20orf166 antisense RNA 1                                                                 |
| 1,07 | RAB18                         | RAB18, member RAS oncogene family                                                         |
| 1,07 | ARHGAP1                       | Memczak2013 ANTISENSE, CDS, coding, INTERNAL, UTR3 best transcript NM_004308              |
| 1,07 | MAGEB16                       | MAGE family member B16                                                                    |
| 1,07 | GRAMD1C                       | GRAM domain containing 1C                                                                 |
| 1,07 | AFMID                         | arylformamidase                                                                           |
| 1,07 | FAM212B                       | family with sequence similarity 212, member B                                             |
| 1,07 | PPIP5K2                       | diphosphoinositol pentakisphosphate kinase 2                                              |
| 1,07 | LRWD1;<br>MIR4467;<br>MIR5090 | leucine-rich repeats and WD repeat domain containing 1; microRNA 4467; microRNA 5090      |
| 1,07 | MYOF                          | myoferlin                                                                                 |
| 1,07 | EPG5                          | ectopic P-granules autophagy protein 5 homolog (C. elegans)                               |
| 1,07 | CACNA2D2                      | calcium channel, voltage-dependent, alpha 2/delta subunit 2                               |
| 1,07 | ANKRD30BL                     | ankyrin repeat domain 30B-like                                                            |
| 1,07 | TPRG1L                        | tumor protein p63 regulated 1-like                                                        |
| 1,07 | HTR3A                         | 5-hydroxytryptamine (serotonin) receptor 3A, ionotropic                                   |
| 1,07 | ANKRD30A                      | ankyrin repeat domain 30A                                                                 |
| 1,07 | TNPO2                         | transportin 2                                                                             |
| 1,07 | MOCS2                         | molybdenum cofactor synthesis 2                                                           |
| 1,07 | ANKRD13B                      | ankyrin repeat domain 13B                                                                 |
| 1,07 | PCSK9                         | proprotein convertase subtilisin/kexin type 9                                             |
| 1,07 | KRCC1                         | lysine-rich coiled-coil 1                                                                 |
| 1,07 | CYP27B1                       | cytochrome P450, family 27, subfamily B, polypeptide 1                                    |
| 1,07 | GABRA5                        | gamma-aminobutyric acid (GABA) A receptor, alpha 5                                        |
| 1,07 | MFAP3                         | microfibrillar associated protein 3                                                       |
| 1,07 | C2orf74                       | chromosome 2 open reading frame 74                                                        |
| 1,07 | FCRL1                         | Fc receptor-like 1                                                                        |
| 1,07 | PCSK5                         | proprotein convertase subtilisin/kexin type 5                                             |
| 1,07 | TG                            | thyroglobulin                                                                             |
| 1,07 | ENO2                          | enolase 2 (gamma, neuronal)                                                               |
| 1,07 | RAB39A                        | RAB39A, member RAS oncogene family                                                        |
| 1,07 | PDLIM1                        | PDZ and LIM domain 1                                                                      |
| 1,07 | GIF                           | gastric intrinsic factor (vitamin B synthesis)                                            |
| 1,07 | ZNF548                        | zinc finger protein 548                                                                   |
| 1,07 | TMEM63A                       | transmembrane protein 63A                                                                 |
| 1,07 | XRCC5                         | Memczak2013 ALT_ACCEPTOR, ALT_DONOR, coding, INTERNAL, intronic best transcript NM_021141 |
| 1,07 | JAM3                          | junctional adhesion molecule 3                                                            |
| 1,07 | HNF1A                         | HNF1 homeobox A                                                                           |
| 1,07 | IST1                          | increased sodium tolerance 1 homolog (yeast)                                              |
| 1,07 | SPINK5                        | serine peptidase inhibitor, Kazal type 5                                                  |

|      |                       |                                                                                                                                       |
|------|-----------------------|---------------------------------------------------------------------------------------------------------------------------------------|
| 1,07 | UGDH                  | UDP-glucose 6-dehydrogenase                                                                                                           |
| 1,07 | KCNK1                 | potassium channel, two pore domain subfamily K, member 1                                                                              |
| 1,07 | PAGE2B                | P antigen family, member 2B                                                                                                           |
| 1,07 | NPC2; MIR4709         | Niemann-Pick disease, type C2; microRNA 4709                                                                                          |
| 1,07 | LRIG1                 |                                                                                                                                       |
| 1,07 | METTL1                | methyltransferase like 1                                                                                                              |
| 1,07 | C15orf41              | chromosome 15 open reading frame 41                                                                                                   |
| 1,07 | PIM3                  | Pim-3 proto-oncogene, serine/threonine kinase                                                                                         |
| 1,07 | HMGA1                 | high mobility group AT-hook 1                                                                                                         |
| 1,07 | SMAD5                 | SMAD family member 5                                                                                                                  |
| 1,07 | CD28                  | CD28 molecule                                                                                                                         |
| 1,07 | SPINK2                | serine peptidase inhibitor, Kazal type 2 (acrosin-trypsin inhibitor)                                                                  |
| 1,07 | DDX31                 | DEAD (Asp-Glu-Ala-Asp) box polypeptide 31                                                                                             |
| 1,07 | TMEM109               | transmembrane protein 109                                                                                                             |
| 1,07 | GTPBP4                | GTP binding protein 4                                                                                                                 |
| 1,07 | OR5D16                | olfactory receptor, family 5, subfamily D, member 16                                                                                  |
| 1,07 | DEDD                  | death effector domain containing                                                                                                      |
| 1,07 | CABP5                 | calcium binding protein 5                                                                                                             |
| 1,07 | TAPBP                 | TAP binding protein (tapasin)                                                                                                         |
| 1,07 | CRLF2                 | cytokine receptor-like factor 2                                                                                                       |
| 1,07 | CRYL1                 | crystallin lambda 1                                                                                                                   |
| 1,07 | AC009133.12;<br>PAGR1 | novel transcript, antisense to C16orf53 and MVP;<br>PAXIP1 associated glutamate-rich protein 1<br>[Source:HGNC Symbol;Acc:HGNC:28707] |
| 1,07 | DNER                  | delta/notch like EGF repeat containing                                                                                                |
| 1,07 | PLS1                  | plastin 1                                                                                                                             |
| 1,07 | MTG1                  | mitochondrial ribosome-associated GTPase 1                                                                                            |
| 1,07 | PRKAR2A               | protein kinase, cAMP-dependent, regulatory, type II, alpha                                                                            |
| 1,07 | TUBB3; MC1R           | tubulin, beta 3 class III; melanocortin 1 receptor (alpha melanocyte stimulating hormone receptor)                                    |
| 1,07 | TRIM34                | tripartite motif containing 34                                                                                                        |
| 1,07 | PLEKHG4B              | Zhang2013 ALT_ACCEPTOR, ALT_DONOR, coding, INTERNAL, intronic best transcript NM_052909                                               |
| 1,07 | H1FNT                 | H1 histone family, member N, testis-specific                                                                                          |
| 1,07 | BPIFA3                | BPI fold containing family A, member 3                                                                                                |
| 1,07 | THEMIS                | thymocyte selection associated                                                                                                        |
| 1,07 | TMEM253               | transmembrane protein 253                                                                                                             |
| 1,07 | ZNF251                | zinc finger protein 251                                                                                                               |
| 1,07 | AFF3                  | Memczak2013 ALT_ACCEPTOR, ALT_DONOR, coding, INTERNAL, intronic best transcript NM_001025108                                          |
| 1,07 | TRAF3IP3              | TRAF3 interacting protein 3                                                                                                           |
| 1,07 | SEZ6L                 | seizure related 6 homolog (mouse)-like                                                                                                |
| 1,07 | MAK16                 | MAK16 homolog                                                                                                                         |
| 1,07 | WASF1                 | WAS protein family, member 1                                                                                                          |
| 1,07 | ZNF738                | zinc finger protein 738                                                                                                               |

|      |                     |                                                                               |
|------|---------------------|-------------------------------------------------------------------------------|
| 1,07 | ZKSCAN7             | zinc finger with KRAB and SCAN domains 7                                      |
| 1,07 | CXorf40B            | chromosome X open reading frame 40B                                           |
| 1,07 | PRAMEF6;<br>PRAMEF5 | PRAME family member 6; PRAME family member 5                                  |
| 1,07 | MORC3               | MORC family CW-type zinc finger 3                                             |
| 1,07 | C11orf72            | chromosome 11 open reading frame 72                                           |
| 1,07 | DNTT                | Transcript Identified by AceView, Entrez Gene ID(s)<br>1791                   |
| 1,07 | RNF223              | ring finger protein 223                                                       |
| 1,07 | CTAG2               | cancer/testis antigen 2                                                       |
| 1,07 | KIAA1024            | KIAA1024                                                                      |
| 1,07 | KIAA1551            | KIAA1551                                                                      |
| 1,07 | MED1                | mediator complex subunit 1                                                    |
| 1,07 | RAD54L              | Transcript Identified by AceView, Entrez Gene ID(s)<br>8438                   |
| 1,07 | KBTBD4              | kelch repeat and BTB (POZ) domain containing 4                                |
| 1,07 | TBP                 | TATA box binding protein                                                      |
| 1,07 | TENM1               | teneurin transmembrane protein 1                                              |
| 1,07 | MYCL                | v-myc avian myelocytomatosis viral oncogene lung<br>carcinoma derived homolog |
| 1,07 | HES5                | hes family bHLH transcription factor 5                                        |
| 1,07 | KRTAP4-2            | keratin associated protein 4-2                                                |
| 1,07 | DLL1                | delta-like 1 (Drosophila)                                                     |
| 1,07 | C12orf4             | chromosome 12 open reading frame 4                                            |
| 1,07 | SMIM18              | small integral membrane protein 18                                            |
| 1,07 | ATP1A1              | ATPase, Na <sup>+</sup> /K <sup>+</sup> transporting, alpha 1 polypeptide     |
| 1,07 | ACTR1A              | ARP1 actin-related protein 1 homolog A, centractin<br>alpha (yeast)           |
| 1,07 | NEK10               | NIMA-related kinase 10                                                        |
| 1,07 | DCDC1               | doublecortin domain containing 1                                              |
| 1,07 | MSRA                | methionine sulfoxide reductase A                                              |
| 1,07 | MAGOH               | mago homolog, exon junction complex core component                            |
| 1,07 | GPR158-AS1          | GPR158 antisense RNA 1                                                        |
| 1,07 | CENPT               | centromere protein T                                                          |
| 1,07 | CTDNEP1             | CTD nuclear envelope phosphatase 1                                            |
| 1,07 | FBXO38              | F-box protein 38                                                              |
| 1,07 | CEBPE               | CCAAT/enhancer binding protein (C/EBP), epsilon                               |
| 1,06 | RPL18A;<br>SNORA68  | ribosomal protein L18a; small nucleolar RNA, H/ACA<br>box 68                  |
| 1,06 | ARSG                | arylsulfatase G                                                               |
| 1,06 | LYPD5               | LY6/PLAUR domain containing 5                                                 |
| 1,06 | DRGX                | dorsal root ganglia homeobox                                                  |
| 1,06 | CTDSP2              | CTD small phosphatase 2                                                       |
| 1,06 | KANSL3              | KAT8 regulatory NSL complex subunit 3                                         |
| 1,06 | ANKS1B              | ankyrin repeat and sterile alpha motif domain<br>containing 1B                |
| 1,06 | FAM183A             | family with sequence similarity 183, member A                                 |
| 1,06 | USP53               | ubiquitin specific peptidase 53                                               |
| 1,06 | KIF15               | kinesin family member 15                                                      |

|      |                       |                                                                                                 |
|------|-----------------------|-------------------------------------------------------------------------------------------------|
| 1,06 | RAB3GAP2;<br>AURKAPS1 | RAB3 GTPase activating protein subunit 2 (non-catalytic); aurora kinase A pseudogene 1          |
| 1,06 | SLC4A5                | solute carrier family 4 (sodium bicarbonate cotransporter), member 5                            |
| 1,06 | APTXX                 | aprataxin                                                                                       |
| 1,06 | ZNF530                | zinc finger protein 530                                                                         |
| 1,06 | ZNF227                | zinc finger protein 227                                                                         |
| 1,06 | C2CD2L                | C2CD2-like                                                                                      |
| 1,06 | PNMA3                 | paraneoplastic Ma antigen 3                                                                     |
| 1,06 | ZNF385B               | zinc finger protein 385B                                                                        |
| 1,06 | ZNF445                | zinc finger protein 445                                                                         |
| 1,06 | PI16                  | peptidase inhibitor 16                                                                          |
| 1,06 | PEPD                  | peptidase D                                                                                     |
| 1,06 | TXNRD1                | thioredoxin reductase 1                                                                         |
| 1,06 | VTA1                  | vesicle (multivesicular body) trafficking 1                                                     |
| 1,06 | OXSR1                 | oxidative stress responsive 1                                                                   |
| 1,06 | CHMP2B                | charged multivesicular body protein 2B                                                          |
| 1,06 | TSPAN33               | tetraspanin 33                                                                                  |
| 1,06 | ALB                   | albumin                                                                                         |
| 1,06 | FAM189A1              | family with sequence similarity 189, member A1                                                  |
| 1,06 | NDUFAF3               | NADH dehydrogenase (ubiquinone) complex I, assembly factor 3                                    |
| 1,06 | TARBP2                | TAR (HIV-1) RNA binding protein 2                                                               |
| 1,06 | RNF220                | Memczak2013 ANTISENSE, coding, INTERNAL, intronic best transcript NM_018150                     |
| 1,06 | GALNT3                | polypeptide N-acetylgalactosaminyltransferase 3                                                 |
| 1,06 | TESK1; MIR4667        | testis-specific kinase 1; microRNA 4667                                                         |
| 1,06 | CEACAM6               | carcinoembryonic antigen-related cell adhesion molecule 6 (non-specific cross reacting antigen) |
| 1,06 | LECT2                 | leukocyte cell-derived chemotaxin 2                                                             |
| 1,06 | FOXB1                 | forkhead box B1                                                                                 |
| 1,06 | EXOC3L1               | exocyst complex component 3-like 1                                                              |
| 1,06 | LRRC49                | leucine rich repeat containing 49                                                               |
| 1,06 | CBX2                  | chromobox homolog 2                                                                             |
| 1,06 | LARP7                 | Zhang2013 ALT_DONOR, coding, INTERNAL, intronic, OVERLAPTX, OVEXON best transcript NM_016648    |
| 1,06 | EME2                  | essential meiotic structure-specific endonuclease subunit 2                                     |
| 1,06 | UBE2F-SCLY            | UBE2F-SCLY readthrough (NMD candidate)                                                          |
| 1,06 | UEVLD                 | UEV and lactate/malate dehydrogenase domains                                                    |
| 1,06 | MRPL37                | mitochondrial ribosomal protein L37                                                             |
| 1,06 | LTBR                  | lymphotoxin beta receptor (TNFR superfamily, member 3)                                          |
| 1,06 | WDR45; PRAF2          | WD repeat domain 45; PRA1 domain family, member 2                                               |
| 1,06 | S100A8                | S100 calcium binding protein A8                                                                 |
| 1,06 | TTC26                 | tetratricopeptide repeat domain 26                                                              |
| 1,06 | HUS1                  | HUS1 checkpoint clamp component                                                                 |
| 1,06 | MLPH                  | melanophilin                                                                                    |

|      |                              |                                                                                                                                                                                         |
|------|------------------------------|-----------------------------------------------------------------------------------------------------------------------------------------------------------------------------------------|
| 1,06 | SMCO2                        | single-pass membrane protein with coiled-coil domains<br>2                                                                                                                              |
| 1,06 | TERF1                        | telomeric repeat binding factor (NIMA-interacting) 1                                                                                                                                    |
| 1,06 | HIST1H2AM;<br>HIST1H3J       | histone cluster 1, H2am; histone cluster 1, H3j                                                                                                                                         |
| 1,06 | KCNC2                        | potassium channel, voltage gated Shaw related<br>subfamily C, member 2                                                                                                                  |
| 1,06 | HGS                          | hepatocyte growth factor-regulated tyrosine kinase<br>substrate                                                                                                                         |
| 1,06 | RFWD3                        | ring finger and WD repeat domain 3                                                                                                                                                      |
| 1,06 | ARNT                         | aryl hydrocarbon receptor nuclear translocator                                                                                                                                          |
| 1,06 | SLC2A6                       | solute carrier family 2 (facilitated glucose transporter),<br>member 6 [Source:HGNC Symbol;Acc:HGNC:11011]                                                                              |
| 1,06 | LOC100505549;<br>RP11-35G9.3 | uncharacterized LOC100505549; Salzman2013<br>ANNOTATED, CDS, coding, OVCODE,<br>OVERLAPTX, OVEXON, UTR3, UTR5 best<br>transcript NM_001242804; novel transcript, antisense<br>to ATP8B1 |
| 1,06 | WDR61                        | WD repeat domain 61                                                                                                                                                                     |
| 1,06 | DCAF17                       | DDB1 and CUL4 associated factor 17                                                                                                                                                      |
| 1,06 | UBIAD1                       | UbiA prenyltransferase domain containing 1                                                                                                                                              |
| 1,06 | WASF3                        | WAS protein family, member 3                                                                                                                                                            |
| 1,06 | CDC16                        | cell division cycle 16                                                                                                                                                                  |
| 1,06 | TBC1D21                      | TBC1 domain family, member 21                                                                                                                                                           |
| 1,06 | SH3KBP1                      | SH3-domain kinase binding protein 1                                                                                                                                                     |
| 1,06 | SHMT2                        | serine hydroxymethyltransferase 2 (mitochondrial)                                                                                                                                       |
| 1,06 | ZNF34                        | zinc finger protein 34                                                                                                                                                                  |
| 1,06 | SLC7A11                      | solute carrier family 7 (anionic amino acid transporter<br>light chain, xc- system), member 11                                                                                          |
| 1,06 | GNL2                         | guanine nucleotide binding protein-like 2 (nucleolar)                                                                                                                                   |
| 1,06 | ARNT2;<br>MIR5572            | aryl-hydrocarbon receptor nuclear translocator 2;<br>microRNA 5572                                                                                                                      |
| 1,06 | ANO1                         | anoctamin 1, calcium activated chloride channel                                                                                                                                         |
| 1,06 | CD6                          | CD6 molecule                                                                                                                                                                            |
| 1,06 | TPD52L2                      | tumor protein D52-like 2                                                                                                                                                                |
| 1,06 | PLAA                         | phospholipase A2-activating protein                                                                                                                                                     |
| 1,06 | POTEB2;<br>POTEB; POTEB3     | POTE ankyrin domain family, member B2; POTE<br>ankyrin domain family, member B; POTE ankyrin<br>domain family, member B3                                                                |
| 1,06 | ZNF200                       | zinc finger protein 200                                                                                                                                                                 |
| 1,06 | C4BPB                        | complement component 4 binding protein, beta                                                                                                                                            |
| 1,06 | ZMIZ2                        | zinc finger, MIZ-type containing 2                                                                                                                                                      |
| 1,06 | MPLKIP                       | M-phase specific PLK1 interacting protein                                                                                                                                               |
| 1,06 | RNASE8                       | ribonuclease, RNase A family, 8                                                                                                                                                         |
| 1,06 | DTD2                         | D-tyrosyl-tRNA deacylase 2 (putative)                                                                                                                                                   |
| 1,06 | TBC1D32                      | TBC1 domain family, member 32                                                                                                                                                           |
| 1,06 | OR8G1                        | olfactory receptor, family 8, subfamily G, member 1<br>(gene/pseudogene)                                                                                                                |
| 1,06 | PTTG2                        | pituitary tumor-transforming 2                                                                                                                                                          |
| 1,06 | IL1F10                       | interleukin 1 family, member 10 (theta)                                                                                                                                                 |

|      |              |                                                                                                                                                                                                       |
|------|--------------|-------------------------------------------------------------------------------------------------------------------------------------------------------------------------------------------------------|
| 1,06 | DYNLRB1      | dynein, light chain, roadblock-type 1                                                                                                                                                                 |
| 1,06 | CLINT1       | clathrin interactor 1                                                                                                                                                                                 |
| 1,06 | NPY          | neuropeptide Y                                                                                                                                                                                        |
| 1,06 | SCN4A        | sodium channel, voltage gated, type IV alpha subunit                                                                                                                                                  |
| 1,06 | CSH1         | chorionic somatomammotropin hormone 1 (placental lactogen)                                                                                                                                            |
| 1,06 | FUBP3        | Transcript Identified by AceView, Entrez Gene ID(s) 8939                                                                                                                                              |
| 1,06 | FAM155B      | family with sequence similarity 155, member B                                                                                                                                                         |
| 1,06 | PTK2         | Transcript Identified by AceView, Entrez Gene ID(s) 5747                                                                                                                                              |
| 1,06 | DDIT3        | DNA-damage-inducible transcript 3                                                                                                                                                                     |
| 1,06 | NCOA4        | nuclear receptor coactivator 4                                                                                                                                                                        |
| 1,06 | COMMD8       | COMM domain containing 8                                                                                                                                                                              |
| 1,06 | DDX49        | DEAD (Asp-Glu-Ala-Asp) box polypeptide 49                                                                                                                                                             |
| 1,06 | CEP104       | centrosomal protein 104kDa                                                                                                                                                                            |
| 1,06 | GRIK4        | glutamate receptor, ionotropic, kainate 4                                                                                                                                                             |
| 1,06 | DHDDS        | dehydrodolichyl diphosphate synthase subunit                                                                                                                                                          |
| 1,06 | MYOG         | myogenin (myogenic factor 4)                                                                                                                                                                          |
| 1,06 | ASTL         | astacin-like metallo-endopeptidase (M12 family)                                                                                                                                                       |
| 1,06 | IPCEF1       | interaction protein for cytohesin exchange factors 1                                                                                                                                                  |
| 1,06 | DHCR7        | 7-dehydrocholesterol reductase                                                                                                                                                                        |
| 1,06 | LOC100133091 | uncharacterized LOC100133091; Salzman2013 ANNOTATED, INTERNAL, ncRNA, OVEXON best transcript NR_029411; Transcript Identified by AceView, Entrez Gene ID(s) 554248; 100133091, RefSeq ID(s) NR_029411 |
| 1,06 | ADCY5        | adenylate cyclase 5                                                                                                                                                                                   |
| 1,06 | GPATCH11     | G-patch domain containing 11                                                                                                                                                                          |
| 1,06 | TPM3         | tropomyosin 3                                                                                                                                                                                         |
| 1,06 | TFEC         | transcription factor EC                                                                                                                                                                               |
| 1,06 | MYH9         | Zhang2013 ALT_ACCEPTOR, ALT_DONOR, coding, INTERNAL, intronic best transcript NM_002473                                                                                                               |
| 1,06 | RAB11FIP3    | RAB11 family interacting protein 3 (class II)                                                                                                                                                         |
| 1,06 | APOBEC3H     | apolipoprotein B mRNA editing enzyme, catalytic polypeptide-like 3H                                                                                                                                   |
| 1,06 | TOP1MT       | topoisomerase (DNA) I, mitochondrial                                                                                                                                                                  |
| 1,06 | ZNF512       | Memczak2013 ANTISENSE, coding, INTERNAL, UTR3 best transcript NM_032434                                                                                                                               |
| 1,06 | ARRDC1-AS1   | ARRDC1 antisense RNA 1                                                                                                                                                                                |
| 1,06 | TSPAN2       | tetraspanin 2                                                                                                                                                                                         |
| 1,06 | GOLGA6L2     | golgin A6 family-like 2                                                                                                                                                                               |
| 1,06 | MAPKAPK3     | mitogen-activated protein kinase-activated protein kinase 3                                                                                                                                           |
| 1,06 | G3BP2        | GTPase activating protein (SH3 domain) binding protein 2                                                                                                                                              |
| 1,06 | SLX1A; SLX1B | SLX1 homolog A, structure-specific endonuclease subunit; SLX1 homolog B, structure-specific endonuclease subunit                                                                                      |
| 1,06 | VWA5B2       | von Willebrand factor A domain containing 5B2                                                                                                                                                         |

|      |                                    |                                                                                                                                  |
|------|------------------------------------|----------------------------------------------------------------------------------------------------------------------------------|
| 1,06 | ARAP2                              | ArfGAP with RhoGAP domain, ankyrin repeat and PH domain 2                                                                        |
| 1,06 | WBP11                              | WW domain binding protein 11                                                                                                     |
| 1,06 | RHAG                               | Rh-associated glycoprotein                                                                                                       |
| 1,06 | SLC38A10                           | solute carrier family 38, member 10                                                                                              |
| 1,06 | CYP20A1                            | cytochrome P450, family 20, subfamily A, polypeptide 1                                                                           |
| 1,06 | ZNF136                             | zinc finger protein 136                                                                                                          |
| 1,06 | RAB24                              | RAB24, member RAS oncogene family                                                                                                |
| 1,06 | HMBS                               | hydroxymethylbilane synthase                                                                                                     |
| 1,06 | IL36A                              | interleukin 36, alpha                                                                                                            |
| 1,06 | SDE2                               | SDE2 telomere maintenance homolog (S. pombe)                                                                                     |
| 1,06 | ELF2                               | ELL associated factor 2                                                                                                          |
| 1,06 | IDS                                | iduronate 2-sulfatase                                                                                                            |
| 1,06 | TVP23C;<br>CDRT4; TVP23C-<br>CDRT4 | trans-golgi network vesicle protein 23 homolog C (S. cerevisiae); CMT1A duplicated region transcript 4; TVP23C-CDRT4 readthrough |
| 1,06 | MOGAT3                             | monoacylglycerol O-acyltransferase 3                                                                                             |
| 1,06 | HSPH1                              | heat shock 105kDa/110kDa protein 1                                                                                               |
| 1,06 | FAM71B                             | family with sequence similarity 71, member B                                                                                     |
| 1,06 | DISP1                              | dispatched homolog 1 (Drosophila)                                                                                                |
| 1,06 | CYB5B                              | cytochrome b5 type B (outer mitochondrial membrane)                                                                              |
| 1,06 | BPI                                | bactericidal/permeability-increasing protein                                                                                     |
| 1,06 | BCL3; MIR8085                      | B-cell CLL/lymphoma 3; microRNA 8085                                                                                             |
| 1,06 | MAGEC3                             | MAGE family member C3                                                                                                            |
| 1,06 | CFAP69                             | cilia and flagella associated protein 69                                                                                         |
| 1,06 | FAM19A5                            | family with sequence similarity 19 (chemokine (C-C motif)-like), member A5                                                       |
| 1,06 | PRUNE                              | prune exopolyphosphatase                                                                                                         |
| 1,06 | WDR88                              | WD repeat domain 88                                                                                                              |
| 1,06 | SH2D5                              | SH2 domain containing 5                                                                                                          |
| 1,06 | PSMB11                             | proteasome (prosome, macropain) subunit, beta type, 11                                                                           |
| 1,06 | IRF4                               | interferon regulatory factor 4                                                                                                   |
| 1,06 | ZNF333                             | zinc finger protein 333                                                                                                          |
| 1,06 | LACTB                              | lactamase, beta                                                                                                                  |
| 1,06 | TAS2R7                             | taste receptor, type 2, member 7                                                                                                 |
| 1,06 | SSX5                               | synovial sarcoma, X breakpoint 5                                                                                                 |
| 1,06 | CATIP                              | ciliogenesis associated TTC17 interacting protein                                                                                |
| 1,06 | NDUFAF1                            | NADH dehydrogenase (ubiquinone) complex I, assembly factor 1                                                                     |
| 1,06 | CCDC79                             | coiled-coil domain containing 79                                                                                                 |
| 1,06 | MARCKS                             | myristoylated alanine-rich protein kinase C substrate                                                                            |
| 1,06 | GHRL                               | ghrelin/obestatin prepropeptide                                                                                                  |
| 1,06 | PROK1                              | prokineticin 1                                                                                                                   |
| 1,06 | ZNF568                             | zinc finger protein 568                                                                                                          |
| 1,06 | HNRNPM                             | heterogeneous nuclear ribonucleoprotein M                                                                                        |
| 1,06 | GGT5                               | gamma-glutamyltransferase 5                                                                                                      |
| 1,06 | SERINC1                            | serine incorporator 1                                                                                                            |

|      |                          |                                                                                                                             |
|------|--------------------------|-----------------------------------------------------------------------------------------------------------------------------|
| 1,06 | DAB2                     | Dab, mitogen-responsive phosphoprotein, homolog 2 (Drosophila)                                                              |
| 1,06 | DNAJC8                   | DnaJ (Hsp40) homolog, subfamily C, member 8                                                                                 |
| 1,06 | NDUFS5                   | NADH dehydrogenase (ubiquinone) Fe-S protein 5, 15kDa (NADH-coenzyme Q reductase)                                           |
| 1,06 | ERGIC2                   | ERGIC and golgi 2                                                                                                           |
| 1,06 | HSPA4                    | heat shock 70kDa protein 4                                                                                                  |
| 1,06 | SCRT1                    | scratch family zinc finger 1                                                                                                |
| 1,06 | TMEM33                   | transmembrane protein 33                                                                                                    |
| 1,06 | KAT6B                    | K(lysine) acetyltransferase 6B                                                                                              |
| 1,06 | C14orf180                | chromosome 14 open reading frame 180                                                                                        |
| 1,06 | C9orf43                  | chromosome 9 open reading frame 43                                                                                          |
| 1,06 | RNF4                     | ring finger protein 4                                                                                                       |
| 1,06 | SLC6A8                   | solute carrier family 6 (neurotransmitter transporter), member 8                                                            |
| 1,06 | AGAP1; noygloy; torkeybo | Jeck2013 ALT_ACCEPTOR, ALT_DONOR, coding, INTERNAL, intronic best transcript NM_001037131; Transcript Identified by AceView |
| 1,06 | CNN2                     | calponin 2                                                                                                                  |
| 1,06 | OS9                      | osteosarcoma amplified 9, endoplasmic reticulum lectin                                                                      |
| 1,06 | CLPX                     | caseinolytic mitochondrial matrix peptidase chaperone subunit                                                               |
| 1,06 | PRPSAP2                  | phosphoribosyl pyrophosphate synthetase-associated protein 2                                                                |
| 1,06 | ZC3H7B                   | zinc finger CCCH-type containing 7B                                                                                         |
| 1,06 | RFX2                     | regulatory factor X, 2 (influences HLA class II expression)                                                                 |
| 1,06 | ATP5D                    | ATP synthase, H <sup>+</sup> transporting, mitochondrial F1 complex, delta subunit                                          |
| 1,06 | C20orf197                | chromosome 20 open reading frame 197                                                                                        |
| 1,06 | RHNO1                    | RAD9-HUS1-RAD1 interacting nuclear orphan 1                                                                                 |
| 1,06 | OR2M2                    | olfactory receptor, family 2, subfamily M, member 2                                                                         |
| 1,06 | CDC123                   | cell division cycle 123                                                                                                     |
| 1,06 | TTC38                    | tetratricopeptide repeat domain 38                                                                                          |
| 1,06 | GBP6                     | guanylate binding protein family, member 6                                                                                  |
| 1,06 | ZNF519                   | zinc finger protein 519                                                                                                     |
| 1,06 | CHIT1                    | chitinase 1 (chitotriosidase)                                                                                               |
| 1,06 | GATS                     | GATS, stromal antigen 3 opposite strand                                                                                     |
| 1,06 | MALT1                    | MALT1 paracaspase                                                                                                           |
| 1,06 | AGBL2                    | ATP/GTP binding protein-like 2                                                                                              |
| 1,06 | TMEM55A                  | transmembrane protein 55A                                                                                                   |
| 1,06 | SELENBP1                 | selenium binding protein 1                                                                                                  |
| 1,06 | DDX21                    | DEAD (Asp-Glu-Ala-Asp) box helicase 21                                                                                      |
| 1,06 | NDFIP2                   | Nedd4 family interacting protein 2                                                                                          |
| 1,06 | DPF1                     | D4, zinc and double PHD fingers family 1                                                                                    |
| 1,06 | WFDC11                   | WAP four-disulfide core domain 11                                                                                           |
| 1,06 | OR4C46                   | olfactory receptor, family 4, subfamily C, member 46                                                                        |
| 1,06 | PRAM1                    | PML-RARA regulated adaptor molecule 1                                                                                       |
| 1,06 | CCDC33                   | coiled-coil domain containing 33                                                                                            |

|      |                                            |                                                                                                                                                                                   |
|------|--------------------------------------------|-----------------------------------------------------------------------------------------------------------------------------------------------------------------------------------|
| 1,06 | MCF2L                                      | MCF.2 cell line derived transforming sequence like                                                                                                                                |
| 1,06 | TLR1                                       | toll-like receptor 1                                                                                                                                                              |
| 1,06 | C22orf29;<br>GNB1L                         | chromosome 22 open reading frame 29; guanine nucleotide binding protein (G protein), beta polypeptide 1-like                                                                      |
| 1,06 | ZNF296                                     | zinc finger protein 296                                                                                                                                                           |
| 1,06 | ZNF573                                     | zinc finger protein 573                                                                                                                                                           |
| 1,06 | SPDYE6;<br>SPDYE2                          | speedy/RINGO cell cycle regulator family member E6; speedy/RINGO cell cycle regulator family member E2                                                                            |
| 1,06 | HOXB7                                      | homeobox B7                                                                                                                                                                       |
| 1,06 | TBL1X                                      | transducin (beta)-like 1X-linked                                                                                                                                                  |
| 1,06 | NGFR                                       | nerve growth factor receptor                                                                                                                                                      |
| 1,06 | AKNA                                       | AT-hook transcription factor                                                                                                                                                      |
| 1,06 | IL26                                       | interleukin 26                                                                                                                                                                    |
| 1,06 | SLC37A3                                    | solute carrier family 37, member 3                                                                                                                                                |
| 1,06 | MTA3                                       | Transcript Identified by AceView, Entrez Gene ID(s) 57504                                                                                                                         |
| 1,06 | DCAF16                                     | DDB1 and CUL4 associated factor 16                                                                                                                                                |
| 1,06 | DCDC1                                      | doublecortin domain containing 1                                                                                                                                                  |
| 1,06 | ATCAY                                      | ataxia, cerebellar, Cayman type                                                                                                                                                   |
| 1,06 | PPP3CB                                     | protein phosphatase 3, catalytic subunit, beta isozyme                                                                                                                            |
| 1,06 | SRP54                                      | signal recognition particle 54kDa                                                                                                                                                 |
| 1,06 | GRAPL                                      | GRB2-related adaptor protein-like                                                                                                                                                 |
| 1,06 | PLPPR2                                     | phospholipid phosphatase related 2                                                                                                                                                |
| 1,06 | NR1I3                                      | nuclear receptor subfamily 1, group I, member 3                                                                                                                                   |
| 1,06 | AADACL3                                    | arylacetamide deacetylase-like 3                                                                                                                                                  |
| 1,06 | KLHL28                                     | kelch-like family member 28                                                                                                                                                       |
| 1,06 | JRK                                        | Jrk helix-turn-helix protein                                                                                                                                                      |
| 1,06 | IL3                                        | interleukin 3                                                                                                                                                                     |
| 1,06 | CNOT4                                      | CCR4-NOT transcription complex subunit 4                                                                                                                                          |
| 1,06 | TPRKB                                      | TP53RK binding protein                                                                                                                                                            |
| 1,06 | GCG                                        | glucagon                                                                                                                                                                          |
| 1,06 | NHP2                                       | NHP2 ribonucleoprotein                                                                                                                                                            |
| 1,06 | SNW1                                       | SNW domain containing 1                                                                                                                                                           |
| 1,06 | CSDE1                                      | cold shock domain containing E1, RNA binding                                                                                                                                      |
| 1,06 | TOB1                                       | transducer of ERBB2, 1                                                                                                                                                            |
| 1,06 | G6PC                                       | glucose-6-phosphatase, catalytic subunit                                                                                                                                          |
| 1,06 | WIPI1                                      | WD repeat domain, phosphoinositide interacting 1                                                                                                                                  |
| 1,06 | P2RY13                                     | purinergic receptor P2Y, G-protein coupled, 13                                                                                                                                    |
| 1,06 | PRKACG                                     | protein kinase, cAMP-dependent, catalytic, gamma                                                                                                                                  |
| 1,06 | DMRTC1;<br>FAM226B;<br>FAM226A;<br>DMRTC1B | DMRT-like family C1; family with sequence similarity 226, member B (non-protein coding); family with sequence similarity 226, member A (non-protein coding); DMRT-like family C1B |
| 1,06 | ELP5                                       | elongator acetyltransferase complex subunit 5                                                                                                                                     |
| 1,06 | DSCC1                                      | DNA replication and sister chromatid cohesion 1                                                                                                                                   |
| 1,06 | SEZ6L2                                     | seizure related 6 homolog (mouse)-like 2                                                                                                                                          |
| 1,06 | BLCAP                                      | bladder cancer associated protein                                                                                                                                                 |
| 1,06 | TMEM53                                     | transmembrane protein 53                                                                                                                                                          |

|      |                               |                                                                                                           |
|------|-------------------------------|-----------------------------------------------------------------------------------------------------------|
| 1,06 | CADPS                         | Ca <sup>++</sup> -dependent secretion activator                                                           |
| 1,06 | KIT                           | v-kit Hardy-Zuckerman 4 feline sarcoma viral oncogene homolog                                             |
| 1,06 | WDR77                         | WD repeat domain 77                                                                                       |
| 1,06 | GFRA4                         | GDNF family receptor alpha 4                                                                              |
| 1,06 | PFKFB4;<br>MIR6823            | 6-phosphofructo-2-kinase/fructose-2,6-biphosphatase 4; microRNA 6823                                      |
| 1,06 | LRP3                          | LDL receptor related protein 3                                                                            |
| 1,06 | KPNA1                         | karyopherin alpha 1                                                                                       |
| 1,06 | PHOX2B                        | paired-like homeobox 2b                                                                                   |
| 1,06 | SACM1L                        | SAC1 suppressor of actin mutations 1-like (yeast)                                                         |
| 1,06 | NFKBIA                        | nuclear factor of kappa light polypeptide gene enhancer in B-cells inhibitor, alpha                       |
| 1,06 | PI4KB                         | phosphatidylinositol 4-kinase, catalytic, beta                                                            |
| 1,06 | NUDT6                         | nudix hydrolase 6                                                                                         |
| 1,06 | OSCP1                         | organic solute carrier partner 1                                                                          |
| 1,06 | NPM1                          | nucleophosmin (nucleolar phosphoprotein B23, numatrin)                                                    |
| 1,06 | LAMC2                         | laminin, gamma 2                                                                                          |
| 1,06 | SLC35E3                       | solute carrier family 35, member E3                                                                       |
| 1,06 | MARCH7                        | membrane associated ring finger 7                                                                         |
| 1,06 | KCNV1                         | potassium channel, voltage gated modifier subfamily V, member 1                                           |
| 1,06 | FAM25G;<br>FAM25C;<br>FAM25BP | family with sequence similarity 25, member G; family with sequence similarity 25, member C; protein FAM25 |
| 1,06 | TNFSF8                        | tumor necrosis factor (ligand) superfamily, member 8                                                      |
| 1,06 | TTC19                         | tetratricopeptide repeat domain 19                                                                        |
| 1,06 | NEXN                          | nexilin (F actin binding protein)                                                                         |
| 1,06 | RAD54L                        | RAD54-like (S. cerevisiae)                                                                                |
| 1,06 | CLEC4F                        | C-type lectin domain family 4, member F                                                                   |
| 1,06 | BAG2                          | BCL2-associated athanogene 2                                                                              |
| 1,06 | ZKSCAN5                       | zinc finger with KRAB and SCAN domains 5                                                                  |
| 1,06 | HAS2                          | hyaluronan synthase 2                                                                                     |
| 1,06 | HOXB13                        | homeobox B13                                                                                              |
| 1,06 | TREML2                        | triggering receptor expressed on myeloid cells-like 2                                                     |
| 1,06 | CTRB2                         | chymotrypsinogen B2                                                                                       |
| 1,06 | NUTM2D                        | NUT family member 2D                                                                                      |
| 1,06 | VPS13C                        | Memczak2013 ANTISENSE, coding, INTERNAL, intronic best transcript NM_020821                               |
| 1,06 | FTH1                          | ferritin, heavy polypeptide 1                                                                             |
| 1,06 | BRAT1                         | BRCA1-associated ATM activator 1                                                                          |
| 1,06 | FAM98A                        | family with sequence similarity 98, member A                                                              |
| 1,06 | OSBPL2                        | oxysterol binding protein-like 2                                                                          |
| 1,06 | BCDIN3D                       | BCDIN3 domain containing                                                                                  |
| 1,06 | TM6SF1                        | transmembrane 6 superfamily member 1                                                                      |
| 1,06 | ZBTB16                        | zinc finger and BTB domain containing 16                                                                  |
| 1,06 | IL2RG                         | interleukin 2 receptor, gamma                                                                             |
| 1,06 | TBCK                          | TBC1 domain containing kinase                                                                             |
| 1,06 | CDHR3                         | cadherin-related family member 3                                                                          |

|      |                   |                                                                                    |
|------|-------------------|------------------------------------------------------------------------------------|
| 1,06 | TSPAN13           | tetraspanin 13                                                                     |
| 1,06 | CLN6              | ceroid-lipofuscinosis, neuronal 6, late infantile, variant                         |
| 1,06 | CSNK1E            | casein kinase 1, epsilon                                                           |
| 1,06 | SPARC             | secreted protein, acidic, cysteine-rich (osteonectin)                              |
| 1,06 | MFSD6L            | major facilitator superfamily domain containing 6-like                             |
| 1,06 | RAB7A             | RAB7A, member RAS oncogene family                                                  |
| 1,06 | NEK1              | NIMA-related kinase 1                                                              |
| 1,06 | C16orf13          | chromosome 16 open reading frame 13                                                |
| 1,06 | MAGEB5            | MAGE family member B5                                                              |
| 1,06 | RSPO4             | R-spondin 4                                                                        |
| 1,06 | CALML5            | calmodulin-like 5                                                                  |
| 1,06 | FAM131A           | family with sequence similarity 131, member A                                      |
| 1,06 | ACTL7A            | actin-like 7A                                                                      |
| 1,06 | PAX4              | paired box 4                                                                       |
| 1,06 | ALKBH2            | alkB homolog 2, alpha-ketoglutarate-dependent dioxygenase                          |
| 1,06 | LHX8              | LIM homeobox 8                                                                     |
| 1,06 | TRAP1             | TNF receptor-associated protein 1                                                  |
| 1,06 | TBCE              | tubulin folding cofactor E                                                         |
| 1,06 | CIB4              | calcium and integrin binding family member 4                                       |
| 1,06 | TMEM247           | transmembrane protein 247                                                          |
| 1,06 | SMAD9             | SMAD family member 9                                                               |
| 1,06 | OR52A5            | olfactory receptor, family 52, subfamily A, member 5                               |
| 1,06 | TMEM175           | transmembrane protein 175                                                          |
| 1,06 | RNF5              | ring finger protein 5, E3 ubiquitin protein ligase                                 |
| 1,06 | NFKBIB            | nuclear factor of kappa light polypeptide gene enhancer in B-cells inhibitor, beta |
| 1,06 | FKBP1B            | FK506 binding protein 1B                                                           |
| 1,06 | PGBD4             | piggyBac transposable element derived 4                                            |
| 1,06 | LHX9              | LIM homeobox 9                                                                     |
| 1,06 | RASIP1            | Ras interacting protein 1                                                          |
| 1,06 | FCN1              | ficolin (collagen/fibrinogen domain containing) 1                                  |
| 1,06 | SPRR2B            | small proline-rich protein 2B                                                      |
| 1,06 | WWP1              | WW domain containing E3 ubiquitin protein ligase 1                                 |
| 1,06 | CAV1              | caveolin 1                                                                         |
| 1,06 | KCNK7             | potassium channel, two pore domain subfamily K, member 7                           |
| 1,06 | TCEB3CL           | transcription elongation factor B polypeptide 3C-like                              |
| 1,06 | HMBS              | hydroxymethylbilane synthase                                                       |
| 1,06 | XDH               | xanthine dehydrogenase                                                             |
| 1,06 | RHCG              | Rh family, C glycoprotein                                                          |
| 1,06 | OR2T10            | olfactory receptor, family 2, subfamily T, member 10                               |
| 1,06 | FTSJ1             | FtsJ RNA methyltransferase homolog 1 (E. coli)                                     |
| 1,06 | PTPN13            | Transcript Identified by AceView, Entrez Gene ID(s) 5783                           |
| 1,06 | XAGE1B;<br>XAGE1E | X antigen family, member 1B; X antigen family, member 1E                           |
| 1,06 | HSPBP1            | HSPA (heat shock 70kDa) binding protein, cytoplasmic cochaperone 1                 |

|      |                                                                           |                                                                                                                                                                                                                     |
|------|---------------------------------------------------------------------------|---------------------------------------------------------------------------------------------------------------------------------------------------------------------------------------------------------------------|
| 1,06 | RGPD4                                                                     | RANBP2-like and GRIP domain containing 4                                                                                                                                                                            |
| 1,06 | RPL18A                                                                    | ribosomal protein L18a                                                                                                                                                                                              |
| 1,06 | STARD4                                                                    | StAR-related lipid transfer domain containing 4                                                                                                                                                                     |
| 1,06 | ATP10B                                                                    | ATPase, class V, type 10B                                                                                                                                                                                           |
| 1,06 | LIPH                                                                      | lipase, member H                                                                                                                                                                                                    |
| 1,06 | RHOT1                                                                     | ras homolog family member T1                                                                                                                                                                                        |
| 1,06 | TMEM185B                                                                  | transmembrane protein 185B                                                                                                                                                                                          |
| 1,06 | HSPA8;<br>SNORD14C;<br>SNORD14D                                           | heat shock 70kDa protein 8; small nucleolar RNA, C/D box 14C; small nucleolar RNA, C/D box 14D                                                                                                                      |
| 1,06 | FDFT1                                                                     | farnesyl-diphosphate farnesyltransferase 1                                                                                                                                                                          |
| 1,06 | PPIL1                                                                     | peptidylprolyl isomerase (cyclophilin)-like 1                                                                                                                                                                       |
| 1,06 | C3orf56                                                                   | chromosome 3 open reading frame 56                                                                                                                                                                                  |
| 1,06 | SMIM23                                                                    | small integral membrane protein 23                                                                                                                                                                                  |
| 1,06 | LIMD2                                                                     | LIM domain containing 2                                                                                                                                                                                             |
| 1,06 | ERMAP                                                                     | erythroblast membrane-associated protein (Scianna blood group)                                                                                                                                                      |
| 1,06 | OAS3                                                                      | 2-5-oligoadenylate synthetase 3                                                                                                                                                                                     |
| 1,06 | TMEM132B                                                                  | transmembrane protein 132B                                                                                                                                                                                          |
| 1,06 | PIGZ                                                                      | phosphatidylinositol glycan anchor biosynthesis class Z                                                                                                                                                             |
| 1,06 | SPTLC3                                                                    | serine palmitoyltransferase, long chain base subunit 3                                                                                                                                                              |
| 1,06 | EEF1E1                                                                    | eukaryotic translation elongation factor 1 epsilon 1                                                                                                                                                                |
| 1,06 | ATG16L2                                                                   | autophagy related 16-like 2                                                                                                                                                                                         |
| 1,06 | TMEM69                                                                    | transmembrane protein 69                                                                                                                                                                                            |
| 1,06 | PILRB;<br>STAG3L5P;<br>PVRIG2P;<br>MIR6840;<br>STAG3L5P-<br>PVRIG2P-PILRB | paired immunoglobulin-like type 2 receptor beta; stromal antigen 3-like 5 pseudogene; poliovirus receptor related immunoglobulin domain containing 2, pseudogene; microRNA 6840; STAG3L5P-PVRIG2P-PILRB readthrough |
| 1,06 | ZNF182                                                                    | zinc finger protein 182                                                                                                                                                                                             |
| 1,06 | DHX58                                                                     | DEXH (Asp-Glu-X-His) box polypeptide 58                                                                                                                                                                             |
| 1,06 | SPSB4                                                                     | splA/ryanodine receptor domain and SOCS box containing 4                                                                                                                                                            |
| 1,06 | ZDHHC11                                                                   | Transcript Identified by AceView, Entrez Gene ID(s) 79844                                                                                                                                                           |
| 1,06 | LAP3                                                                      | leucine aminopeptidase 3                                                                                                                                                                                            |
| 1,06 | ZNF567                                                                    | zinc finger protein 567                                                                                                                                                                                             |
| 1,06 | C12orf43                                                                  | chromosome 12 open reading frame 43                                                                                                                                                                                 |
| 1,06 | MAP3K14                                                                   | mitogen-activated protein kinase kinase kinase 14                                                                                                                                                                   |
| 1,06 | VKORC1L1                                                                  | vitamin K epoxide reductase complex subunit 1 like 1                                                                                                                                                                |
| 1,06 | CDC27                                                                     | cell division cycle 27                                                                                                                                                                                              |
| 1,06 | SMIM15                                                                    | small integral membrane protein 15                                                                                                                                                                                  |
| 1,06 | SMPD4                                                                     | sphingomyelin phosphodiesterase 4, neutral membrane (neutral sphingomyelinase-3)                                                                                                                                    |
| 1,06 | CBLB                                                                      | Cbl proto-oncogene B, E3 ubiquitin protein ligase                                                                                                                                                                   |
| 1,06 | AOAH                                                                      | acyloxyacyl hydrolase (neutrophil)                                                                                                                                                                                  |
| 1,06 | RBPJ                                                                      | recombination signal binding protein for immunoglobulin kappa J region                                                                                                                                              |

|      |          |                                                                                                          |
|------|----------|----------------------------------------------------------------------------------------------------------|
| 1,06 | HSPA1L   | heat shock 70kDa protein 1-like                                                                          |
| 1,06 | ATG16L1  | autophagy related 16-like 1                                                                              |
| 1,06 | VGLL1    | vestigial-like family member 1                                                                           |
| 1,06 | SBNO2    | strawberry notch homolog 2 (Drosophila)                                                                  |
| 1,06 | MTRNR2L5 | MT-RNR2-like 5                                                                                           |
| 1,06 | CEP290   | centrosomal protein 290kDa                                                                               |
| 1,06 | OR4C5    | olfactory receptor, family 4, subfamily C, member 5<br>(gene/pseudogene)                                 |
| 1,06 | CCNL1    | cyclin L1                                                                                                |
| 1,06 | C1GALT1  | core 1 synthase, glycoprotein-N-acetylgalactosamine 3-<br>beta-galactosyltransferase 1                   |
| 1,06 | LUC7L    | LUC7-like                                                                                                |
| 1,06 | TSTD3    | thiosulfate sulfurtransferase (rhodanese)-like domain<br>containing 3                                    |
| 1,06 | MBIP     | MAP3K12 binding inhibitory protein 1                                                                     |
| 1,06 | ACOT4    | acyl-CoA thioesterase 4                                                                                  |
| 1,06 | LIN28B   | lin-28 homolog B (C. elegans)                                                                            |
| 1,06 | RBM34    | RNA binding motif protein 34                                                                             |
| 1,06 | EMP1     | epithelial membrane protein 1                                                                            |
| 1,06 | PRSS37   | protease, serine, 37                                                                                     |
| 1,06 | MIF4GD   | MIF4G domain containing                                                                                  |
| 1,06 | SERTAD2  | SERTA domain containing 2                                                                                |
| 1,06 | MLLT3    | myeloid/lymphoid or mixed-lineage leukemia;<br>translocated to, 3                                        |
| 1,06 | PDP1     | pyruvate dehydrogenase phosphatase catalytic subunit 1                                                   |
| 1,06 | AWAT2    | acyl-CoA wax alcohol acyltransferase 2                                                                   |
| 1,06 | GSC2     | goosecoid homeobox 2                                                                                     |
| 1,06 | SDC4     | syndecan 4                                                                                               |
| 1,06 | REXO4    | REX4 homolog, 3'-5' exonuclease [Source:HGNC<br>Symbol;Acc:HGNC:12820]                                   |
| 1,06 | SYTL1    | synaptotagmin like 1                                                                                     |
| 1,06 | SPSB3    | splA/ryanodine receptor domain and SOCS box<br>containing 3                                              |
| 1,06 | ZNF200   | Transcript Identified by AceView, Entrez Gene ID(s)<br>7752                                              |
| 1,06 | MDC1     | mediator of DNA-damage checkpoint 1                                                                      |
| 1,06 | FXYP7    | FXYP domain containing ion transport regulator 7                                                         |
| 1,06 | SMYP4    | SET and MYND domain containing 4                                                                         |
| 1,06 | MZT1     | mitotic spindle organizing protein 1                                                                     |
| 1,06 | HSPA12B  | heat shock 70kD protein 12B                                                                              |
| 1,06 | ZNF790   | zinc finger protein 790                                                                                  |
| 1,06 | REM2     | RAS (RAD and GEM)-like GTP binding 2                                                                     |
| 1,06 | HNRNPK   | Zhang2013 ALT_ACCEPTOR, ALT_DONOR, coding,<br>INTERNAL, intronic, OVERLAPTX best transcript<br>NM_002140 |
| 1,06 | SWT1     | SWT1 RNA endoribonuclease homolog                                                                        |
| 1,06 | NUDCD1   | NudC domain containing 1                                                                                 |
| 1,06 | ADIPOR2  | adiponectin receptor 2                                                                                   |

|      |               |                                                                                                |
|------|---------------|------------------------------------------------------------------------------------------------|
| 1,06 | TNFRSF21      | tumor necrosis factor receptor superfamily, member 21                                          |
| 1,06 | PPP1R3A       | protein phosphatase 1, regulatory subunit 3A                                                   |
| 1,06 | ZNF337        | zinc finger protein 337                                                                        |
| 1,06 | SMARCAL1      | SWI/SNF related, matrix associated, actin dependent regulator of chromatin, subfamily a-like 1 |
| 1,06 | IFNGR1        | interferon gamma receptor 1                                                                    |
| 1,06 | UMAD1         | UBAP1-MVB12-associated (UMA) domain containing 1                                               |
| 1,06 | BEND6         | BEN domain containing 6                                                                        |
| 1,06 | SARS2         | seryl-tRNA synthetase 2, mitochondrial                                                         |
| 1,06 | PGR           | progesterone receptor                                                                          |
| 1,06 | NANOGNB       | NANOG neighbor homeobox                                                                        |
| 1,06 | EPDR1         | ependymin related 1                                                                            |
| 1,06 | ZNF214        | zinc finger protein 214                                                                        |
| 1,06 | AKR7A2        | aldo-keto reductase family 7, member A2                                                        |
| 1,06 | MAGEA6        | MAGE family member A6                                                                          |
| 1,06 | FGF5          | fibroblast growth factor 5                                                                     |
| 1,06 | FMO5          | flavin containing monooxygenase 5                                                              |
| 1,06 | CCR9          | chemokine (C-C motif) receptor 9                                                               |
| 1,06 | ITGAM         | Transcript Identified by AceView, Entrez Gene ID(s) 3684                                       |
| 1,06 | PTPRU         | protein tyrosine phosphatase, receptor type, U                                                 |
| 1,06 | SLC9A6        | solute carrier family 9, subfamily A (NHE6, cation proton antiporter 6), member 6              |
| 1,06 | HSH2D         | hematopoietic SH2 domain containing                                                            |
| 1,06 | CCDC61        | coiled-coil domain containing 61                                                               |
| 1,06 | SLC23A3       | solute carrier family 23, member 3                                                             |
| 1,06 | ZPLD1         | zona pellucida-like domain containing 1                                                        |
| 1,06 | COX1          | cytochrome c oxidase subunit I                                                                 |
| 1,06 | GRK7          | G protein-coupled receptor kinase 7                                                            |
| 1,06 | FADS6         | fatty acid desaturase 6                                                                        |
| 1,06 | LONRF1        | LON peptidase N-terminal domain and ring finger 1                                              |
| 1,06 | C1orf131      | chromosome 1 open reading frame 131                                                            |
| 1,06 | SIGLEC8       | sialic acid binding Ig-like lectin 8                                                           |
| 1,06 | CARHSP1       | calcium regulated heat stable protein 1                                                        |
| 1,06 | ZMYND12       | zinc finger, MYND-type containing 12                                                           |
| 1,06 | HMGCL         | 3-hydroxymethyl-3-methylglutaryl-CoA lyase                                                     |
| 1,06 | ZNF395        | zinc finger protein 395                                                                        |
| 1,06 | ROBO4         | roundabout guidance receptor 4                                                                 |
| 1,06 | ABCB9         | ATP binding cassette subfamily B member 9                                                      |
| 1,06 | C1orf228      | chromosome 1 open reading frame 228                                                            |
| 1,06 | MPDU1         | mannose-P-dolichol utilization defect 1                                                        |
| 1,06 | SPOCK1        | sparc/osteonectin, cwcv and kazal-like domains proteoglycan (testican) 1                       |
| 1,06 | FAM217B       | family with sequence similarity 217, member B                                                  |
| 1,06 | UBE2N         | ubiquitin conjugating enzyme E2N                                                               |
| 1,06 | TRIOBP; NOL12 | TRIO and F-actin binding protein; nucleolar protein 12                                         |
| 1,06 | THOC1         | THO complex 1                                                                                  |

|      |          |                                                                                                            |
|------|----------|------------------------------------------------------------------------------------------------------------|
| 1,06 | ELP2     | elongator acetyltransferase complex subunit 2                                                              |
| 1,06 | NLGN4X   | neuroligin 4, X-linked                                                                                     |
| 1,06 | LEP      | leptin                                                                                                     |
| 1,06 | LARP6    | La ribonucleoprotein domain family, member 6                                                               |
| 1,06 | TSPY3    | testis specific protein, Y-linked 3                                                                        |
| 1,06 | KISS1R   | KISS1 receptor                                                                                             |
| 1,06 | PRM2     | protamine 2                                                                                                |
| 1,06 | KIAA0556 | KIAA0556                                                                                                   |
| 1,06 | ZSCAN5A  | zinc finger and SCAN domain containing 5A                                                                  |
| 1,06 | GLRA4    | glycine receptor alpha 4                                                                                   |
| 1,06 | USF2     | upstream transcription factor 2, c-fos interacting                                                         |
| 1,06 | C19orf47 | chromosome 19 open reading frame 47                                                                        |
| 1,06 | EMILIN2  | elastin microfibril interfacier 2                                                                          |
| 1,06 | LMTK3    | lemur tyrosine kinase 3                                                                                    |
| 1,06 | RNF121   | ring finger protein 121                                                                                    |
| 1,06 | C14orf37 | chromosome 14 open reading frame 37                                                                        |
| 1,06 | OR13C7   | olfactory receptor, family 13, subfamily C, member 7 (gene/pseudogene) [Source:HGNC Symbol;Acc:HGNC:15102] |
| 1,06 | ADGRG4   | adhesion G protein-coupled receptor G4                                                                     |
| 1,06 | ZNF705CP | zinc finger protein 705C, pseudogene                                                                       |
| 1,06 | ARID3A   | AT rich interactive domain 3A (BRIGHT-like)                                                                |
| 1,06 | OR13C5   | olfactory receptor, family 13, subfamily C, member 5                                                       |
| 1,06 | SGCG     | sarcoglycan gamma                                                                                          |
| 1,06 | KIAA1683 | Memczak2013 ANTISENSE, CDS, coding, INTERNAL best transcript NM_001145304                                  |
| 1,06 | SDR42E1  | short chain dehydrogenase/reductase family 42E, member 1                                                   |
| 1,06 | NAA30    | N(alpha)-acetyltransferase 30, NatC catalytic subunit                                                      |
| 1,06 | USP22    | ubiquitin specific peptidase 22                                                                            |
| 1,06 | PDE6H    | phosphodiesterase 6H, cGMP-specific, cone, gamma                                                           |
| 1,06 | ZNF416   | zinc finger protein 416                                                                                    |
| 1,06 | TAS2R42  | taste receptor, type 2, member 42                                                                          |
| 1,06 | SKP2     | S-phase kinase-associated protein 2, E3 ubiquitin protein ligase                                           |
| 1,06 | RPL7A    | ribosomal protein L7a                                                                                      |
| 1,06 | NEK5     | NIMA-related kinase 5                                                                                      |
| 1,06 | ASCL3    | achaete-scute family bHLH transcription factor 3                                                           |
| 1,06 | C12orf73 | chromosome 12 open reading frame 73                                                                        |
| 1,06 | SUGP1    | SURP and G-patch domain containing 1                                                                       |
| 1,06 | LSM3     | LSM3 homolog, U6 small nuclear RNA and mRNA degradation associated                                         |
| 1,06 | SPINK8   | serine peptidase inhibitor, Kazal type 8 (putative)                                                        |
| 1,06 | SLF2     | SMC5-SMC6 complex localization factor 2                                                                    |
| 1,06 | ASTN2    | astrotactin 2                                                                                              |
| 1,06 | CARD6    | caspase recruitment domain family, member 6                                                                |
| 1,06 | SYVN1    | synovial apoptosis inhibitor 1, synoviolin                                                                 |
| 1,06 | PLEKHG1  | pleckstrin homology domain containing, family G (with RhoGef domain) member 1                              |

|      |                               |                                                                                                                                                    |
|------|-------------------------------|----------------------------------------------------------------------------------------------------------------------------------------------------|
| 1,06 | TSPY3; TSPY4;<br>TSPY8; TSPY1 | testis specific protein, Y-linked 3; testis specific protein, Y-linked 4; testis specific protein, Y-linked 8; testis specific protein, Y-linked 1 |
| 1,06 | GPR25                         | G protein-coupled receptor 25                                                                                                                      |
| 1,06 | OPCML                         | opioid binding protein/cell adhesion molecule-like                                                                                                 |
| 1,06 | KCTD3                         | potassium channel tetramerization domain containing 3                                                                                              |
| 1,06 | RPS6KA1                       | ribosomal protein S6 kinase, 90kDa, polypeptide 1                                                                                                  |
| 1,06 | SPDL1                         | spindle apparatus coiled-coil protein 1                                                                                                            |
| 1,06 | SNAI3                         | snail family zinc finger 3                                                                                                                         |
| 1,06 | SLC26A2                       | solute carrier family 26 (anion exchanger), member 2                                                                                               |
| 1,06 | BARHL2                        | BarH-like homeobox 2                                                                                                                               |
| 1,06 | FCN2                          | ficolin (collagen/fibrinogen domain containing lectin) 2                                                                                           |
| 1,06 | DCAF11                        | DDB1 and CUL4 associated factor 11                                                                                                                 |
| 1,06 | SEC63                         | SEC63 homolog, protein translocation regulator                                                                                                     |
| 1,06 | KCTD18                        | potassium channel tetramerization domain containing 18                                                                                             |
| 1,06 | MEN1                          | Jeck2013 ANTISENSE, CDS, coding, INTERNAL, OVCODE, OVEXON best transcript NM_130803                                                                |
| 1,06 | AP3S2; MIR5009                | adaptor-related protein complex 3, sigma 2 subunit; microRNA 5009                                                                                  |
| 1,06 | SLC16A1                       | solute carrier family 16 (monocarboxylate transporter), member 1                                                                                   |
| 1,06 | DYRK1B                        | dual specificity tyrosine-(Y)-phosphorylation regulated kinase 1B                                                                                  |
| 1,06 | DENND2A                       | DENN/MADD domain containing 2A                                                                                                                     |
| 1,06 | ELL2                          | elongation factor, RNA polymerase II, 2                                                                                                            |
| 1,06 | FAM228A                       | family with sequence similarity 228, member A                                                                                                      |
| 1,06 | CCDC6                         | coiled-coil domain containing 6                                                                                                                    |
| 1,06 | ASB10                         | ankyrin repeat and SOCS box containing 10                                                                                                          |
| 1,06 | CLDN2                         | claudin 2                                                                                                                                          |
| 1,06 | ZNF770                        | zinc finger protein 770                                                                                                                            |
| 1,06 | RTN2                          | reticulon 2                                                                                                                                        |
| 1,06 | GNAQ;<br>skeyplorbu           | Memczak2013 ANTISENSE, coding, INTERNAL, intronic best transcript NM_002072; Transcript Identified by AceView                                      |
| 1,06 | RS1                           | retinoschisin 1                                                                                                                                    |
| 1,06 | FAM135B                       | family with sequence similarity 135, member B                                                                                                      |
| 1,06 | DNAJB1                        | DnaJ (Hsp40) homolog, subfamily B, member 1                                                                                                        |
| 1,06 | AGER                          | advanced glycosylation end product-specific receptor                                                                                               |
| 1,06 | RSPH10B2;<br>RSPH10B          | radial spoke head 10 homolog B2 (Chlamydomonas); radial spoke head 10 homolog B (Chlamydomonas)                                                    |
| 1,06 | CBWD2                         | COBW domain containing 2                                                                                                                           |
| 1,06 | TNFSF15                       | tumor necrosis factor (ligand) superfamily, member 15                                                                                              |
| 1,06 | LIN7C                         | lin-7 homolog C (C. elegans)                                                                                                                       |
| 1,06 | USP26                         | ubiquitin specific peptidase 26                                                                                                                    |
| 1,06 | KRBOX4                        | KRAB box domain containing 4                                                                                                                       |
| 1,06 | ZNF578                        | zinc finger protein 578                                                                                                                            |
| 1,06 | PTS                           | 6-pyruvoyltetrahydropterin synthase                                                                                                                |

|      |                          |                                                                                                                      |
|------|--------------------------|----------------------------------------------------------------------------------------------------------------------|
| 1,06 | CIZ1                     | CDKN1A interacting zinc finger protein 1                                                                             |
| 1,06 | CXorf40A                 | chromosome X open reading frame 40A                                                                                  |
| 1,06 | SARM1                    | sterile alpha and TIR motif containing 1                                                                             |
| 1,06 | NDUFA10                  | NADH dehydrogenase (ubiquinone) 1 alpha subcomplex, 10, 42kDa                                                        |
| 1,06 | SLC43A1                  | solute carrier family 43 (amino acid system L transporter), member 1                                                 |
| 1,06 | ABHD2                    | abhydrolase domain containing 2                                                                                      |
| 1,06 | FAM57A                   | family with sequence similarity 57, member A                                                                         |
| 1,06 | DIS3L                    | DIS3 like exosome 3-5 exoribonuclease                                                                                |
| 1,06 | DEXI                     | Dexi homolog (mouse)                                                                                                 |
| 1,06 | SCARF1                   | scavenger receptor class F, member 1                                                                                 |
| 1,06 | TMEM167A                 | transmembrane protein 167A                                                                                           |
| 1,06 | ITGB2                    | Memczak2013 ANTISENSE, CDS, coding, INTERNAL best transcript NM_001127491                                            |
| 1,06 | ACSM2A                   | acyl-CoA synthetase medium-chain family member 2A                                                                    |
| 1,06 | HRH1                     | histamine receptor H1                                                                                                |
| 1,06 | BCO1                     | beta-carotene oxygenase 1                                                                                            |
| 1,06 | OR2AE1                   | olfactory receptor, family 2, subfamily AE, member 1                                                                 |
| 1,06 | MSR1                     | macrophage scavenger receptor 1                                                                                      |
| 1,06 | MYBL2                    | v-myb avian myeloblastosis viral oncogene homolog-like 2                                                             |
| 1,06 | SNRPD1                   | small nuclear ribonucleoprotein D1 polypeptide                                                                       |
| 1,06 | ODF3B                    | outer dense fiber of sperm tails 3B                                                                                  |
| 1,06 | MINOS1                   | mitochondrial inner membrane organizing system 1                                                                     |
| 1,06 | ZNF628                   | zinc finger protein 628                                                                                              |
| 1,06 | LTF                      | lactotransferrin                                                                                                     |
| 1,06 | RPS6KA2                  | ribosomal protein S6 kinase, 90kDa, polypeptide 2                                                                    |
| 1,06 | GPR4                     | G protein-coupled receptor 4                                                                                         |
| 1,06 | ST8SIA2                  | ST8 alpha-N-acetyl-neuraminide alpha-2,8-sialyltransferase 2                                                         |
| 1,06 | AC009133.17;<br>C16orf54 | Memczak2013 ANTISENSE, coding, INTERNAL, intronic best transcript NM_175900; novel transcript, antisense to C16orf54 |
| 1,06 | HIBCH                    | Transcript Identified by AceView, Entrez Gene ID(s) 26275                                                            |
| 1,06 | HIST1H2BM                | histone cluster 1, H2bm                                                                                              |
| 1,06 | ZNF583                   | zinc finger protein 583                                                                                              |
| 1,06 | PLRG1                    | pleiotropic regulator 1                                                                                              |
| 1,06 | SERTAD2                  | SERTA domain containing 2                                                                                            |
| 1,06 | RHOXF2B;<br>RHOXF2       | Rhox homeobox family, member 2B; Rhox homeobox family, member 2                                                      |
| 1,06 | DNAJB7                   | DnaJ (Hsp40) homolog, subfamily B, member 7                                                                          |
| 1,06 | GLYR1                    | glyoxylate reductase 1 homolog (Arabidopsis)                                                                         |
| 1,06 | HGH1                     | HGH1 homolog                                                                                                         |
| 1,06 | RIMBP3C                  | RIMS binding protein 3C                                                                                              |
| 1,06 | CTXN1                    | cortixin 1                                                                                                           |
| 1,06 | OR2T1                    | olfactory receptor, family 2, subfamily T, member 1                                                                  |
| 1,06 | LMOD1                    | leiomodlin 1 (smooth muscle)                                                                                         |

|      |               |                                                                                         |
|------|---------------|-----------------------------------------------------------------------------------------|
| 1,06 | INTS4P2       | integrator complex subunit 4 pseudogene 2                                               |
| 1,06 | EXD1          | exonuclease 3-5 domain containing 1                                                     |
| 1,06 | METTL3        | methyltransferase like 3                                                                |
| 1,06 | SURF1         | surfeit 1                                                                               |
| 1,06 | DERL1         | derlin 1                                                                                |
| 1,06 | LIG1          | ligase I, DNA, ATP-dependent                                                            |
| 1,06 | DRG1          | developmentally regulated GTP binding protein 1                                         |
| 1,06 | SLC52A3       | solute carrier family 52 (riboflavin transporter), member 3                             |
| 1,06 | KSR1          | Zhang2013 ALT_ACCEPTOR, ALT_DONOR, coding, INTERNAL, intronic best transcript NM_014238 |
| 1,06 | ZNF777        | zinc finger protein 777                                                                 |
| 1,06 | SLC18A1       | solute carrier family 18 (vesicular monoamine transporter), member 1                    |
| 1,06 | TRMT2A        | tRNA methyltransferase 2 homolog A                                                      |
| 1,06 | ANKRD65       | ankyrin repeat domain 65                                                                |
| 1,06 | COL6A3        | collagen, type VI, alpha 3                                                              |
| 1,06 | NSMF; MIR7114 | NMDA receptor synaptonuclear signaling and neuronal migration factor; microRNA 7114     |
| 1,06 | IFNB1         | interferon, beta 1, fibroblast                                                          |
| 1,06 | IL6R          | Memczak2013 ANTISENSE, coding, INTERNAL, UTR3 best transcript NM_000565                 |
| 1,06 | NR2C2         | Transcript Identified by AceView, Entrez Gene ID(s) 7182                                |
| 1,06 | WDR89         | WD repeat domain 89                                                                     |
| 1,06 | NACC1         | nucleus accumbens associated 1, BEN and BTB (POZ) domain containing                     |
| 1,06 | OR1P1         | olfactory receptor, family 1, subfamily P, member 1 (gene/pseudogene)                   |
| 1,06 | POLA2         | polymerase (DNA directed), alpha 2, accessory subunit                                   |
| 1,06 | TGM6          | transglutaminase 6                                                                      |
| 1,06 | ANKRD46       | ankyrin repeat domain 46                                                                |
| 1,06 | THEMIS2       | thymocyte selection associated family member 2                                          |
| 1,06 | FCHSD2        | FCH and double SH3 domains 2                                                            |
| 1,06 | COPS8         | COP9 signalosome subunit 8                                                              |
| 1,06 | LDB1          | LIM domain binding 1                                                                    |
| 1,06 | AGK           | acylglycerol kinase                                                                     |
| 1,06 | PEX13         | peroxisomal biogenesis factor 13                                                        |
| 1,06 | STXBP3        | syntaxin binding protein 3                                                              |
| 1,06 | RNF216        | ring finger protein 216                                                                 |
| 1,06 | NCAN          | neurocan                                                                                |
| 1,06 | DDX41         | DEAD (Asp-Glu-Ala-Asp) box polypeptide 41                                               |
| 1,06 | ANKS4B        | ankyrin repeat and sterile alpha motif domain containing 4B                             |
| 1,06 | KCNA1         | potassium channel, voltage gated shaker related subfamily A, member 1                   |
| 1,06 | ANGPT4        | angiopoietin 4                                                                          |
| 1,06 | MSN           | moesin                                                                                  |

|      |                      |                                                                                         |
|------|----------------------|-----------------------------------------------------------------------------------------|
| 1,06 | ZMIZ1                | Zhang2013 ALT_ACCEPTOR, ALT_DONOR, coding, INTERNAL, intronic best transcript NM_020338 |
| 1,06 | POU2F3               | POU class 2 homeobox 3                                                                  |
| 1,06 | OR2T4                | olfactory receptor, family 2, subfamily T, member 4                                     |
| 1,06 | MORN1                | MORN repeat containing 1                                                                |
| 1,06 | KIF19                | kinesin family member 19                                                                |
| 1,06 | CCDC73               | coiled-coil domain containing 73                                                        |
| 1,06 | KIAA0907;<br>SCARNA4 | KIAA0907; small Cajal body-specific RNA 4                                               |
| 1,06 | SRSF10               | serine/arginine-rich splicing factor 10                                                 |
| 1,06 | AXL                  | AXL receptor tyrosine kinase                                                            |
| 1,06 | PRSS53               | protease, serine 53                                                                     |
| 1,06 | ACP6                 | acid phosphatase 6, lysophosphatidic                                                    |
| 1,06 | PARD3                | par-3 family cell polarity regulator                                                    |
| 1,06 | MIR4728; ERBB2       | microRNA 4728; erb-b2 receptor tyrosine kinase 2                                        |
| 1,06 | MAP3K11              | mitogen-activated protein kinase kinase kinase 11                                       |
| 1,06 | C1orf145             | chromosome 1 open reading frame 145                                                     |
| 1,06 | RAB8A                | RAB8A, member RAS oncogene family                                                       |
| 1,06 | ISOC1                | isochorismatase domain containing 1                                                     |
| 1,06 | CAMK1G               | calcium/calmodulin-dependent protein kinase IG                                          |
| 1,06 | ZCCHC3               | zinc finger, CCHC domain containing 3                                                   |
| 1,06 | LRRC40               | leucine rich repeat containing 40                                                       |
| 1,06 | GPR3                 | G protein-coupled receptor 3                                                            |
| 1,06 | HIST1H3I             | histone cluster 1, H3i                                                                  |
| 1,06 | GALNT16              | polypeptide N-acetylgalactosaminyltransferase 16                                        |
| 1,06 | RPS28                | ribosomal protein S28                                                                   |
| 1,06 | SCP2D1               | SCP2 sterol-binding domain containing 1                                                 |
| 1,06 | DNAJA1               | DnaJ (Hsp40) homolog, subfamily A, member 1                                             |
| 1,06 | FGD2                 | FYVE, RhoGEF and PH domain containing 2                                                 |
| 1,06 | SFTPC                | surfactant protein C                                                                    |
| 1,06 | SYT3                 | synaptotagmin III                                                                       |
| 1,06 | IGHMBP2              | immunoglobulin mu binding protein 2                                                     |
| 1,06 | ELFN2                | extracellular leucine-rich repeat and fibronectin type III domain containing 2          |
| 1,06 | S100G                | S100 calcium binding protein G                                                          |
| 1,06 | MLANA                | melan-A                                                                                 |
| 1,06 | SLC12A8              | solute carrier family 12, member 8                                                      |
| 1,06 | TAMM41               | TAM41 mitochondrial translocator assembly and maintenance homolog                       |
| 1,06 | TSPY10               | testis specific protein, Y-linked 10                                                    |
| 1,06 | MICAL2               | MICAL-like 2                                                                            |
| 1,06 | OR6C70               | olfactory receptor, family 6, subfamily C, member 70                                    |
| 1,06 | PPP6R1               | Memczak2013 ANTISENSE, CDS, coding, INTERNAL best transcript NM_014931                  |
| 1,06 | CBWD3                | COBW domain containing 3                                                                |
| 1,06 | OAZ3                 | ornithine decarboxylase antizyme 3                                                      |
| 1,06 | ZFP69B               | ZFP69 zinc finger protein B                                                             |
| 1,06 | OR52B2               | olfactory receptor, family 52, subfamily B, member 2                                    |

|      |                     |                                                                                                                                           |
|------|---------------------|-------------------------------------------------------------------------------------------------------------------------------------------|
| 1,06 | B4GALT6             | UDP-Gal:betaGlcNAc beta 1,4- galactosyltransferase, polypeptide 6                                                                         |
| 1,06 | CES4A               | carboxylesterase 4A                                                                                                                       |
| 1,06 | C11orf68            | chromosome 11 open reading frame 68                                                                                                       |
| 1,06 | MMP21               | matrix metalloproteinase 21                                                                                                               |
| 1,06 | ZNF226              | zinc finger protein 226                                                                                                                   |
| 1,06 | SETD1A              | SET domain containing 1A                                                                                                                  |
| 1,06 | MEIOB;<br>LINC00254 | meiosis specific with OB domains; long intergenic non-protein coding RNA 254                                                              |
| 1,06 | SCGB1D2             | secretoglobin, family 1D, member 2                                                                                                        |
| 1,06 | PNPLA4              | patatin-like phospholipase domain containing 4                                                                                            |
| 1,06 | FAM35A              | family with sequence similarity 35, member A                                                                                              |
| 1,06 | TMEM35              | transmembrane protein 35                                                                                                                  |
| 1,06 | ZNF664              | zinc finger protein 664                                                                                                                   |
| 1,06 | EIF5AL1             | eukaryotic translation initiation factor 5A-like 1                                                                                        |
| 1,06 | AIPL1               | aryl hydrocarbon receptor interacting protein-like 1                                                                                      |
| 1,06 | PRR16               | proline rich 16                                                                                                                           |
| 1,06 | SEC11C              | SEC11 homolog C, signal peptidase complex subunit                                                                                         |
| 1,06 | KLK15               | kallikrein related peptidase 15                                                                                                           |
| 1,06 | EIF5A               | eukaryotic translation initiation factor 5A                                                                                               |
| 1,06 | WDR97               | WD repeat domain 97                                                                                                                       |
| 1,06 | MFSD1               | major facilitator superfamily domain containing 1                                                                                         |
| 1,06 | WDR3                | WD repeat domain 3                                                                                                                        |
| 1,06 | DRG2                | developmentally regulated GTP binding protein 2                                                                                           |
| 1,06 | C12orf56            | chromosome 12 open reading frame 56                                                                                                       |
| 1,06 | SLCO1B7;<br>SLCO1B1 | solute carrier organic anion transporter family, member 1B7 (non-functional); solute carrier organic anion transporter family, member 1B1 |
| 1,06 | MACROD2;<br>RPS3P1  | MACRO domain containing 2; ribosomal protein S3 pseudogene 1                                                                              |
| 1,06 | KLF14               | Kruppel-like factor 14                                                                                                                    |
| 1,06 | MYO1F               | Memczak2013 ANTISENSE, CDS, coding, INTERNAL best transcript NM_012335                                                                    |
| 1,06 | DUSP14              | dual specificity phosphatase 14                                                                                                           |
| 1,06 | ZNF10               | zinc finger protein 10                                                                                                                    |
| 1,05 | GSTM3               | glutathione S-transferase mu 3 (brain)                                                                                                    |
| 1,05 | SSPN                | sarcospan                                                                                                                                 |
| 1,05 | ZSCAN2              | zinc finger and SCAN domain containing 2                                                                                                  |
| 1,05 | NKX2-6              | NK2 homeobox 6                                                                                                                            |
| 1,05 | DMRT2               | doublesex and mab-3 related transcription factor 2                                                                                        |
| 1,05 | RIF1                | replication timing regulatory factor 1                                                                                                    |
| 1,05 | MAGEA9B;<br>MAGEA9  | MAGE family member A9B; MAGE family member A9                                                                                             |
| 1,05 | SEC14L2             | SEC14-like lipid binding 2                                                                                                                |
| 1,05 | C5orf47             | chromosome 5 open reading frame 47                                                                                                        |
| 1,05 | TEKT3               | tektin 3                                                                                                                                  |
| 1,05 | TCN1                | transcobalamin I (vitamin B12 binding protein, R binder family)                                                                           |
| 1,05 | TMEM106B            | transmembrane protein 106B                                                                                                                |
| 1,05 | ASB9                | ankyrin repeat and SOCS box containing 9                                                                                                  |

|      |                     |                                                                                              |
|------|---------------------|----------------------------------------------------------------------------------------------|
| 1,05 | RBM48               | RNA binding motif protein 48                                                                 |
| 1,05 | CELF1               | Memczak2013 ALT_ACCEPTOR, ALT_DONOR, coding, INTERNAL, intronic best transcript NM_001172639 |
| 1,05 | CLEC7A              | C-type lectin domain family 7, member A                                                      |
| 1,05 | ZNF560              | zinc finger protein 560                                                                      |
| 1,05 | ZNF431;<br>VN1R82P  | zinc finger protein 431; vomeronasal 1 receptor 82 pseudogene                                |
| 1,05 | MSMP                | microseminoprotein, prostate associated                                                      |
| 1,05 | LCTL                | lactase-like                                                                                 |
| 1,05 | MYEOV               | myeloma overexpressed                                                                        |
| 1,05 | COX14               | COX14 cytochrome c oxidase assembly factor                                                   |
| 1,05 | OR2W5               | olfactory receptor, family 2, subfamily W, member 5 (gene/pseudogene)                        |
| 1,05 | ZSCAN25             | zinc finger and SCAN domain containing 25                                                    |
| 1,05 | CDSN                | corneodesmosin                                                                               |
| 1,05 | MARCH11             | membrane associated ring finger 11                                                           |
| 1,05 | IFNL4               | interferon, lambda 4 (gene/pseudogene)                                                       |
| 1,05 | DPP3                | dipeptidyl-peptidase 3                                                                       |
| 1,05 | KIF26B              | kinesin family member 26B                                                                    |
| 1,05 | CASC3; MIR6866      | cancer susceptibility candidate 3; microRNA 6866                                             |
| 1,05 | CPEB3               | cytoplasmic polyadenylation element binding protein 3                                        |
| 1,05 | SLC25A46            | solute carrier family 25, member 46                                                          |
| 1,05 | ATP8; ATP6;<br>COX3 | ATP synthase F0 subunit 8; ATP synthase F0 subunit 6; cytochrome c oxidase III               |
| 1,05 | TMC4                | transmembrane channel like 4                                                                 |
| 1,05 | ZBTB22              | zinc finger and BTB domain containing 22                                                     |
| 1,05 | ISCA1               | iron-sulfur cluster assembly 1                                                               |
| 1,05 | SOX9                | SRY box 9                                                                                    |
| 1,05 | ZNF639              | zinc finger protein 639                                                                      |
| 1,05 | TNFSF13B            | tumor necrosis factor (ligand) superfamily, member 13b                                       |
| 1,05 | MRPL4               | mitochondrial ribosomal protein L4                                                           |
| 1,05 | PROP1               | PROP paired-like homeobox 1                                                                  |
| 1,05 | MLKL                | mixed lineage kinase domain-like                                                             |
| 1,05 | ARHGEF3             | Rho guanine nucleotide exchange factor 3                                                     |
| 1,05 | GCAT                | glycine C-acetyltransferase                                                                  |
| 1,05 | SLC7A8              | solute carrier family 7 (amino acid transporter light chain, L system), member 8             |
| 1,05 | POMGNT1             | protein O-linked mannose N-acetylglucosaminyltransferase 1 (beta 1,2-)                       |
| 1,05 | SEC24A              | SEC24 homolog A, COPII coat complex component                                                |
| 1,05 | ACRV1               | acrosomal vesicle protein 1                                                                  |
| 1,05 | DCAF4L1             | DDB1 and CUL4 associated factor 4-like 1                                                     |
| 1,05 | CENPQ               | centromere protein Q                                                                         |
| 1,05 | GTPBP1              | GTP binding protein 1                                                                        |

|      |                                |                                                                                                           |
|------|--------------------------------|-----------------------------------------------------------------------------------------------------------|
| 1,05 | DDX11                          | Zhang2013 ALT_ACCEPTOR, ALT_DONOR, coding, INTERNAL, intronic best transcript NM_030653                   |
| 1,05 | HIF1AN                         | hypoxia inducible factor 1, alpha subunit inhibitor                                                       |
| 1,05 | LOC100287225;<br>RP11-267C16.1 | uncharacterized LOC100287225; novel transcript                                                            |
| 1,05 | NOB1                           | NIN1/RPN12 binding protein 1 homolog                                                                      |
| 1,05 | CDC23                          | cell division cycle 23                                                                                    |
| 1,05 | SLCO2A1                        | solute carrier organic anion transporter family, member 2A1                                               |
| 1,05 | SHH                            | sonic hedgehog                                                                                            |
| 1,05 | VPS11                          | VPS11, CORVET/HOPS core subunit [Source:HGNC Symbol;Acc:HGNC:14583]                                       |
| 1,05 | C11orf84                       | chromosome 11 open reading frame 84                                                                       |
| 1,05 | GIMAP6                         | GTPase, IMAP family member 6                                                                              |
| 1,05 | TNNI1                          | troponin I type 1 (skeletal, slow)                                                                        |
| 1,05 | OR52N2                         | olfactory receptor, family 52, subfamily N, member 2                                                      |
| 1,05 | AP1M2                          | adaptor-related protein complex 1, mu 2 subunit                                                           |
| 1,05 | NUDT19                         | nudix hydrolase 19                                                                                        |
| 1,05 | C2orf48                        | chromosome 2 open reading frame 48                                                                        |
| 1,05 | RIMBP2                         | RIMS binding protein 2                                                                                    |
| 1,05 | ZNF550                         | zinc finger protein 550                                                                                   |
| 1,05 | HYOU1                          | hypoxia up-regulated 1                                                                                    |
| 1,05 | DEPDC4                         | DEP domain containing 4                                                                                   |
| 1,05 | IMPA1                          | inositol(myo)-1(or 4)-monophosphatase 1                                                                   |
| 1,05 | AP5S1                          | adaptor-related protein complex 5, sigma 1 subunit                                                        |
| 1,05 | CSTF2                          | cleavage stimulation factor, 3 pre-RNA, subunit 2                                                         |
| 1,05 | RP11-10L7.1;<br>HERC6          | Transcript Identified by AceView, Entrez Gene ID(s) 55008; novel transcript                               |
| 1,05 | C15orf32                       | chromosome 15 open reading frame 32                                                                       |
| 1,05 | AKAP8L                         | A kinase (PRKA) anchor protein 8-like                                                                     |
| 1,05 | CYSRT1                         | cysteine-rich tail protein 1                                                                              |
| 1,05 | PRDM5                          | PR domain containing 5                                                                                    |
| 1,05 | FZD2                           | frizzled class receptor 2                                                                                 |
| 1,05 | TUBB2A                         | tubulin, beta 2A class IIa                                                                                |
| 1,05 | OPHN1                          | oligophrenin 1                                                                                            |
| 1,05 | CD276                          | CD276 molecule                                                                                            |
| 1,05 | STXBP4                         | syntaxin binding protein 4                                                                                |
| 1,05 | PKHD1                          | polycystic kidney and hepatic disease 1 (autosomal recessive)                                             |
| 1,05 | RTF1                           | RTF1 homolog, Paf1/RNA polymerase II complex component                                                    |
| 1,05 | C19orf24                       | chromosome 19 open reading frame 24                                                                       |
| 1,05 | VAMP2                          | vesicle associated membrane protein 2                                                                     |
| 1,05 | SLC5A3; MRPS6                  | solute carrier family 5 (sodium/myo-inositol cotransporter), member 3; mitochondrial ribosomal protein S6 |
| 1,05 | NCK1                           | NCK adaptor protein 1                                                                                     |
| 1,05 | GGA3                           | golgi-associated, gamma adaptin ear containing, ARF binding protein 3                                     |

|      |                   |                                                                                                                                                                                                                                                                                                                                                                                                                                                                                                                           |
|------|-------------------|---------------------------------------------------------------------------------------------------------------------------------------------------------------------------------------------------------------------------------------------------------------------------------------------------------------------------------------------------------------------------------------------------------------------------------------------------------------------------------------------------------------------------|
| 1,05 | DUS3L             | Memczak2013 ANTISENSE, CDS, coding, INTERNAL best transcript NM_020175                                                                                                                                                                                                                                                                                                                                                                                                                                                    |
| 1,05 | OR51A7            | olfactory receptor, family 51, subfamily A, member 7                                                                                                                                                                                                                                                                                                                                                                                                                                                                      |
| 1,05 | MAFF              | v-maf avian musculoaponeurotic fibrosarcoma oncogene homolog F                                                                                                                                                                                                                                                                                                                                                                                                                                                            |
| 1,05 | EEFSEC            | Memczak2013 ALT_ACCEPTOR, ALT_DONOR, coding, INTERNAL, intronic best transcript NM_021937                                                                                                                                                                                                                                                                                                                                                                                                                                 |
| 1,05 | POLR1C            | polymerase (RNA) I polypeptide C                                                                                                                                                                                                                                                                                                                                                                                                                                                                                          |
| 1,05 | ZNF570            | zinc finger protein 570                                                                                                                                                                                                                                                                                                                                                                                                                                                                                                   |
| 1,05 | C16orf62          | chromosome 16 open reading frame 62                                                                                                                                                                                                                                                                                                                                                                                                                                                                                       |
| 1,05 | SLC40A1           | solute carrier family 40 (iron-regulated transporter), member 1                                                                                                                                                                                                                                                                                                                                                                                                                                                           |
| 1,05 | UBE2D1            | ubiquitin conjugating enzyme E2D 1                                                                                                                                                                                                                                                                                                                                                                                                                                                                                        |
| 1,05 | GRM4              | glutamate receptor, metabotropic 4                                                                                                                                                                                                                                                                                                                                                                                                                                                                                        |
| 1,05 | SYT16             | synaptotagmin XVI                                                                                                                                                                                                                                                                                                                                                                                                                                                                                                         |
| 1,05 | ERCC4             | excision repair cross-complementation group 4                                                                                                                                                                                                                                                                                                                                                                                                                                                                             |
| 1,05 | RTP2              | receptor (chemosensory) transporter protein 2                                                                                                                                                                                                                                                                                                                                                                                                                                                                             |
| 1,05 | TRAF3IP2          | TRAF3 interacting protein 2                                                                                                                                                                                                                                                                                                                                                                                                                                                                                               |
| 1,05 | GTF3C5            | general transcription factor IIIC subunit 5                                                                                                                                                                                                                                                                                                                                                                                                                                                                               |
| 1,05 | UNC119            | unc-119 lipid binding chaperone                                                                                                                                                                                                                                                                                                                                                                                                                                                                                           |
| 1,05 | VPS35             | VPS35 retromer complex component                                                                                                                                                                                                                                                                                                                                                                                                                                                                                          |
| 1,05 | ZNF608            | zinc finger protein 608                                                                                                                                                                                                                                                                                                                                                                                                                                                                                                   |
| 1,05 | LEPROTL1          | leptin receptor overlapping transcript-like 1                                                                                                                                                                                                                                                                                                                                                                                                                                                                             |
| 1,05 | CEP162            | centrosomal protein 162kDa                                                                                                                                                                                                                                                                                                                                                                                                                                                                                                |
| 1,05 | PSMC1             | Homo sapiens proteasome (prosome, macropain) 26S subunit, ATPase, 1, mRNA (cDNA clone MGC:8541 IMAGE:2822718), complete cds.; Homo sapiens proteasome (prosome, macropain) 26S subunit, ATPase, 1, mRNA (cDNA clone MGC:24583 IMAGE:4133348), complete cds.; Homo sapiens proteasome (prosome, macropain) 26S subunit, ATPase, 1, mRNA (cDNA clone MGC:86994 IMAGE:5264945), complete cds.; Homo sapiens proteasome (prosome, macropain) 26S subunit, ATPase, 1, mRNA (cDNA clone MGC:88853 IMAGE:5456334), complete cds. |
| 1,05 | HYI               | hydroxypyruvate isomerase (putative)                                                                                                                                                                                                                                                                                                                                                                                                                                                                                      |
| 1,05 | KRTAP6-3          | keratin associated protein 6-3                                                                                                                                                                                                                                                                                                                                                                                                                                                                                            |
| 1,05 | BEX5              | brain expressed X-linked 5                                                                                                                                                                                                                                                                                                                                                                                                                                                                                                |
| 1,05 | TMEM255A          | transmembrane protein 255A                                                                                                                                                                                                                                                                                                                                                                                                                                                                                                |
| 1,05 | YIPF7             | Yip1 domain family member 7                                                                                                                                                                                                                                                                                                                                                                                                                                                                                               |
| 1,05 | ARL17B;<br>ARL17A | ADP-ribosylation factor like GTPase 17B; ADP-ribosylation factor like GTPase 17A                                                                                                                                                                                                                                                                                                                                                                                                                                          |
| 1,05 | MYO5A             | myosin VA                                                                                                                                                                                                                                                                                                                                                                                                                                                                                                                 |
| 1,05 | F2RL1             | coagulation factor II (thrombin) receptor-like 1                                                                                                                                                                                                                                                                                                                                                                                                                                                                          |
| 1,05 | MYB               | v-myb avian myeloblastosis viral oncogene homolog                                                                                                                                                                                                                                                                                                                                                                                                                                                                         |
| 1,05 | TRAPPC4           | trafficking protein particle complex 4                                                                                                                                                                                                                                                                                                                                                                                                                                                                                    |
| 1,05 | ARHGEF1           | Rho guanine nucleotide exchange factor 1                                                                                                                                                                                                                                                                                                                                                                                                                                                                                  |
| 1,05 | MAP2K3            | mitogen-activated protein kinase kinase 3                                                                                                                                                                                                                                                                                                                                                                                                                                                                                 |
| 1,05 | MYO16             | myosin XVI                                                                                                                                                                                                                                                                                                                                                                                                                                                                                                                |

|      |               |                                                                                        |
|------|---------------|----------------------------------------------------------------------------------------|
| 1,05 | PBDC1         | polysaccharide biosynthesis domain containing 1                                        |
| 1,05 | POLR2E        | polymerase (RNA) II (DNA directed) polypeptide E, 25kDa                                |
| 1,05 | TPSAB1; TPSB2 | tryptase alpha/beta 1; tryptase beta 2 (gene/pseudogene)                               |
| 1,05 | PLCH1         | phospholipase C, eta 1                                                                 |
| 1,05 | KAT6B         | K(lysine) acetyltransferase 6B                                                         |
| 1,05 | LRRC41        | leucine rich repeat containing 41                                                      |
| 1,05 | LPIN3         | lipin 3                                                                                |
| 1,05 | TMEM41A       | transmembrane protein 41A                                                              |
| 1,05 | TFAP2E        | transcription factor AP-2 epsilon (activating enhancer binding protein 2 epsilon)      |
| 1,05 | COL19A1       | collagen, type XIX, alpha 1                                                            |
| 1,05 | TRIM64B       | tripartite motif containing 64B                                                        |
| 1,05 | CAPN3         | calpain 3                                                                              |
| 1,05 | ARIH2         | ariadne RBR E3 ubiquitin protein ligase 2                                              |
| 1,05 | AQP10         | aquaporin 10                                                                           |
| 1,05 | PSKH1         | protein serine kinase H1                                                               |
| 1,05 | GATAD2A       | Jeck2013 ALT_ACCEPTOR, ALT_DONOR, coding, INTERNAL, intronic best transcript NM_017660 |
| 1,05 | MIS18A        | MIS18 kinetochore protein A                                                            |
| 1,05 | ABCB7         | ATP binding cassette subfamily B member 7                                              |
| 1,05 | IFI27         | interferon, alpha-inducible protein 27                                                 |
| 1,05 | MCCC1         | methylcrotonoyl-CoA carboxylase 1                                                      |
| 1,05 | FARS2         | phenylalanyl-tRNA synthetase 2, mitochondrial                                          |
| 1,05 | ITGAX         | integrin alpha X                                                                       |
| 1,05 | FBXO31        | F-box protein 31                                                                       |
| 1,05 | TMEM229B      | transmembrane protein 229B                                                             |
| 1,05 | ATP6V1C1      | ATPase, H <sup>+</sup> transporting, lysosomal 42kDa, V1 subunit C1                    |
| 1,05 | AMH; MIR4321  | anti-Mullerian hormone; microRNA 4321                                                  |
| 1,05 | FGL1          | fibrinogen like 1                                                                      |
| 1,05 | LENG1         | leukocyte receptor cluster (LRC) member 1                                              |
| 1,05 | C6orf183      | chromosome 6 open reading frame 183                                                    |
| 1,05 | PARP3         | poly(ADP-ribose) polymerase family member 3                                            |
| 1,05 | ENHO          | energy homeostasis associated                                                          |
| 1,05 | EBLN1         | endogenous Bornavirus-like nucleoprotein 1                                             |
| 1,05 | DSTN          | destrin (actin depolymerizing factor)                                                  |
| 1,05 | VMA21         | VMA21 vacuolar H <sup>+</sup> -ATPase homolog (S. cerevisiae)                          |
| 1,05 | ZBTB48        | zinc finger and BTB domain containing 48                                               |
| 1,05 | HTR1B         | 5-hydroxytryptamine (serotonin) receptor 1B, G protein coupled                         |
| 1,05 | MLLT1         | myeloid/lymphoid or mixed-lineage leukemia; translocated to, 1                         |
| 1,05 | OAS2          | 2-5-oligoadenylate synthetase 2                                                        |
| 1,05 | XRCC4         | X-ray repair complementing defective repair in Chinese hamster cells 4                 |
| 1,05 | THAP7         | THAP domain containing 7                                                               |

|      |                       |                                                                  |
|------|-----------------------|------------------------------------------------------------------|
| 1,05 | TRIP6; MIR6875        | thyroid hormone receptor interactor 6; microRNA 6875             |
| 1,05 | YAE1D1                | Yae1 domain containing 1                                         |
| 1,05 | ARHGAP29              | Rho GTPase activating protein 29                                 |
| 1,05 | GTSF1L                | gametocyte specific factor 1-like                                |
| 1,05 | SPRR1A                | small proline-rich protein 1A                                    |
| 1,05 | GRM5                  | glutamate receptor, metabotropic 5                               |
| 1,05 | OR2K2                 | olfactory receptor, family 2, subfamily K, member 2              |
| 1,05 | B3GALT5               | UDP-Gal:betaGlcNAc beta 1,3-galactosyltransferase 5              |
| 1,05 | OSTM1                 | osteopetrosis associated transmembrane protein 1                 |
| 1,05 | TEX12                 | testis expressed 12                                              |
| 1,05 | ZNF35                 | zinc finger protein 35                                           |
| 1,05 | G2E3                  | G2/M-phase specific E3 ubiquitin protein ligase                  |
| 1,05 | TMEM121               | transmembrane protein 121                                        |
| 1,05 | RAP1GAP2              | RAP1 GTPase activating protein 2                                 |
| 1,05 | PCNP                  | PEST proteolytic signal containing nuclear protein               |
| 1,05 | EIF5A2                | eukaryotic translation initiation factor 5A2                     |
| 1,05 | RAB40B                | RAB40B, member RAS oncogene family                               |
| 1,05 | DDX58                 | DEAD (Asp-Glu-Ala-Asp) box polypeptide 58                        |
| 1,05 | MAP4                  | microtubule associated protein 4                                 |
| 1,05 | KLHL3                 | kelch-like family member 3                                       |
| 1,05 | GSTM2                 | glutathione S-transferase mu 2 (muscle)                          |
| 1,05 | ALG1L                 | ALG1, chitobiosyldiphosphodolichol beta-mannosyltransferase-like |
| 1,05 | TSHB                  | thyroid stimulating hormone, beta                                |
| 1,05 | PADI4                 | peptidyl arginine deiminase, type IV                             |
| 1,05 | FKBP1                 | FK506 binding protein like                                       |
| 1,05 | DEFB105B;<br>DEFB105A | defensin, beta 105B; defensin, beta 105A                         |
| 1,05 | HIST1H3B              | histone cluster 1, H3b                                           |
| 1,05 | PRDX6                 | peroxiredoxin 6                                                  |
| 1,05 | STX8                  | syntaxin 8                                                       |
| 1,05 | FAM72A                | family with sequence similarity 72, member A                     |
| 1,05 | OR8H2                 | olfactory receptor, family 8, subfamily H, member 2              |
| 1,05 | JOSD1                 | Josephin domain containing 1                                     |
| 1,05 | SOCS5                 | suppressor of cytokine signaling 5                               |
| 1,05 | SCYL1                 | SCY1-like, kinase-like 1                                         |
| 1,05 | CDX4                  | caudal type homeobox 4                                           |
| 1,05 | TMEM192               | transmembrane protein 192                                        |
| 1,05 | FAM213A               | family with sequence similarity 213, member A                    |
| 1,05 | WDSUB1                | WD repeat, sterile alpha motif and U-box domain containing 1     |
| 1,05 | NHSL2                 | NHS-like 2                                                       |
| 1,05 | ZNF599                | zinc finger protein 599                                          |
| 1,05 | RPUSD3                | RNA pseudouridylate synthase domain containing 3                 |
| 1,05 | OTOG                  | otogelin                                                         |
| 1,05 | GINS3                 | GINS complex subunit 3 (Psf3 homolog)                            |
| 1,05 | ZNF426                | zinc finger protein 426                                          |
| 1,05 | CAV3                  | caveolin 3                                                       |

|      |                         |                                                                                        |
|------|-------------------------|----------------------------------------------------------------------------------------|
| 1,05 | ABHD16B                 | abhydrolase domain containing 16B                                                      |
| 1,05 | TRY2P                   | trypsinogen-like pseudogene                                                            |
| 1,05 | NKX1-1                  | NK1 homeobox 1                                                                         |
| 1,05 | UFM1                    | ubiquitin-fold modifier 1                                                              |
| 1,05 | TOR1A                   | torsin family 1, member A (torsin A)                                                   |
| 1,05 | KIAA2026                | KIAA2026                                                                               |
| 1,05 | RASGRF1                 | Ras protein-specific guanine nucleotide-releasing factor 1                             |
| 1,05 | TRAPPC8                 | trafficking protein particle complex 8                                                 |
| 1,05 | ZP2                     | zona pellucida glycoprotein 2 (sperm receptor)                                         |
| 1,05 | TSPY2                   | testis specific protein, Y-linked 2                                                    |
| 1,05 | DOC2A                   | double C2-like domains, alpha                                                          |
| 1,05 | FAAP20                  | Fanconi anemia core complex associated protein 20                                      |
| 1,05 | LYPLA1                  | lysophospholipase I                                                                    |
| 1,05 | COASY                   | CoA synthase                                                                           |
| 1,05 | SLC22A18AS              | solute carrier family 22 (organic cation transporter), member 18 antisense             |
| 1,05 | ZMYM3                   | zinc finger, MYM-type 3                                                                |
| 1,05 | CCDC84                  | coiled-coil domain containing 84                                                       |
| 1,05 | TMEM258;<br>MIR611      | transmembrane protein 258; microRNA 611                                                |
| 1,05 | TLE3                    | Memczak2013 ANTISENSE, coding, INTERNAL, intronic best transcript NM_001105192         |
| 1,05 | TAF5                    | TAF5 RNA polymerase II, TATA box binding protein (TBP)-associated factor, 100kDa       |
| 1,05 | SYK                     | spleen tyrosine kinase                                                                 |
| 1,05 | ISOC2                   | isochorismatase domain containing 2                                                    |
| 1,05 | NR0B1                   | nuclear receptor subfamily 0, group B, member 1                                        |
| 1,05 | ANKRD20A1;<br>ANKRD20A3 | ankyrin repeat domain 20 family, member A1; ankyrin repeat domain 20 family, member A3 |
| 1,05 | NRF1                    | nuclear respiratory factor 1                                                           |
| 1,05 | BBS9                    | Bardet-Biedl syndrome 9                                                                |
| 1,05 | CNIH1                   | cornichon family AMPA receptor auxiliary protein 1                                     |
| 1,05 | DMRTC2                  | DMRT-like family C2                                                                    |
| 1,05 | CCNJL                   | cyclin J-like                                                                          |
| 1,05 | ANKRD36B                | ankyrin repeat domain 36B                                                              |
| 1,05 | CCDC62                  | coiled-coil domain containing 62                                                       |
| 1,05 | FKBP15                  | FK506 binding protein 15                                                               |
| 1,05 | LINGO1-AS1              | LINGO1 antisense RNA 1                                                                 |
| 1,05 | C1QB                    | complement component 1, q subcomponent, B chain                                        |
| 1,05 | FREM3                   | FRAS1 related extracellular matrix 3                                                   |
| 1,05 | PYCRL                   | pyrroline-5-carboxylate reductase-like                                                 |
| 1,05 | TP53AIP1                | tumor protein p53 regulated apoptosis inducing protein 1                               |
| 1,05 | NR5A1                   | nuclear receptor subfamily 5, group A, member 1                                        |
| 1,05 | PSMA1                   | proteasome subunit alpha 1                                                             |
| 1,05 | FANCF                   | Fanconi anemia complementation group F                                                 |
| 1,05 | RSPO1                   | R-spondin 1                                                                            |
| 1,05 | GPR75-ASB3              | GPR75-ASB3 readthrough                                                                 |

|      |                      |                                                                                                         |
|------|----------------------|---------------------------------------------------------------------------------------------------------|
| 1,05 | RBPJL                | recombination signal binding protein for immunoglobulin kappa J region-like                             |
| 1,05 | TSNAX                | translin-associated factor X                                                                            |
| 1,05 | PRAMEF5              | PRAME family member 5                                                                                   |
| 1,05 | OR10A4               | olfactory receptor, family 10, subfamily A, member 4                                                    |
| 1,05 | TFAP2A               | transcription factor AP-2 alpha (activating enhancer binding protein 2 alpha)                           |
| 1,05 | APOB                 | apolipoprotein B                                                                                        |
| 1,05 | MAT2A                | methionine adenosyltransferase II, alpha                                                                |
| 1,05 | DACT2                | dishevelled-binding antagonist of beta-catenin 2                                                        |
| 1,05 | SMIM14               | small integral membrane protein 14                                                                      |
| 1,05 | RNF19B               | ring finger protein 19B                                                                                 |
| 1,05 | ELMOD2               | ELMO/CED-12 domain containing 2                                                                         |
| 1,05 | SEC16B               | SEC16 homolog B, endoplasmic reticulum export factor                                                    |
| 1,05 | CRTC2                | CREB regulated transcription coactivator 2                                                              |
| 1,05 | UBE2A                | ubiquitin conjugating enzyme E2A                                                                        |
| 1,05 | NOL10                | nucleolar protein 10                                                                                    |
| 1,05 | DEFB4B               | defensin, beta 4B                                                                                       |
| 1,05 | ZBTB14               | zinc finger and BTB domain containing 14                                                                |
| 1,05 | C15orf48;<br>MIR147B | chromosome 15 open reading frame 48; microRNA 147b                                                      |
| 1,05 | C16orf74             | chromosome 16 open reading frame 74                                                                     |
| 1,05 | TIGIT                | T-cell immunoreceptor with Ig and ITIM domains                                                          |
| 1,05 | FBF1                 | Fas (TNFRSF6) binding factor 1                                                                          |
| 1,05 | TBC1D14              | TBC1 domain family, member 14                                                                           |
| 1,05 | C5orf38              | chromosome 5 open reading frame 38                                                                      |
| 1,05 | AKIRIN1              | akirin 1                                                                                                |
| 1,05 | NDUFAF4              | NADH dehydrogenase (ubiquinone) complex I, assembly factor 4                                            |
| 1,05 | EDC3                 | enhancer of mRNA decapping 3                                                                            |
| 1,05 | CACNA1S              | calcium channel, voltage-dependent, L type, alpha 1S subunit                                            |
| 1,05 | CMBL                 | carboxymethylenebutenolidase homolog (Pseudomonas)                                                      |
| 1,05 | MFAP3L               | microfibrillar associated protein 3 like                                                                |
| 1,05 | OR10G9               | olfactory receptor, family 10, subfamily G, member 9                                                    |
| 1,05 | ZNF329               | zinc finger protein 329                                                                                 |
| 1,05 | ANXA8                | annexin A8                                                                                              |
| 1,05 | SLC2A6               | solute carrier family 2 (facilitated glucose transporter), member 6 [Source:HGNC Symbol;Acc:HGNC:11011] |
| 1,05 | DDX42                | DEAD (Asp-Glu-Ala-Asp) box helicase 42                                                                  |
| 1,05 | SLAIN2               | SLAIN motif family member 2                                                                             |
| 1,05 | POM121               | POM121 transmembrane nucleoporin                                                                        |
| 1,05 | HOXA7                | homeobox A7                                                                                             |
| 1,05 | LMBR1L               | limb development membrane protein 1-like                                                                |
| 1,05 | CYP2W1               | cytochrome P450, family 2, subfamily W, polypeptide 1                                                   |
| 1,05 | PDIA3                | protein disulfide isomerase family A member 3                                                           |

|      |                     |                                                                        |
|------|---------------------|------------------------------------------------------------------------|
| 1,05 | TMEM42              | transmembrane protein 42                                               |
| 1,05 | ATP6V0C             | ATPase, H <sup>+</sup> transporting, lysosomal 16kDa, V0 subunit c     |
| 1,05 | BRICD5              | BRICHOS domain containing 5                                            |
| 1,05 | FCF1                | FCF1 rRNA-processing protein                                           |
| 1,05 | DGCR14              | Transcript Identified by AceView, Entrez Gene ID(s) 8220               |
| 1,05 | PDS5A               | PDS5 cohesin associated factor A                                       |
| 1,05 | DHFRL1              | dihydrofolate reductase like 1                                         |
| 1,05 | THTPA               | thiamine triphosphatase                                                |
| 1,05 | CALHM3              | calcium homeostasis modulator 3                                        |
| 1,05 | SETD7               | SET domain containing (lysine methyltransferase) 7                     |
| 1,05 | CPSF4               | cleavage and polyadenylation specific factor 4                         |
| 1,05 | TRNAU1AP            | tRNA selenocysteine 1 associated protein 1                             |
| 1,05 | TEX40               | testis expressed 40                                                    |
| 1,05 | SLC35E1             | solute carrier family 35, member E1                                    |
| 1,05 | ZNF267              | zinc finger protein 267                                                |
| 1,05 | MLF2                | myeloid leukemia factor 2                                              |
| 1,05 | CHTF8               | chromosome transmission fidelity factor 8                              |
| 1,05 | RDH13               | retinol dehydrogenase 13 (all-trans/9-cis)                             |
| 1,05 | RFC3                | replication factor C subunit 3                                         |
| 1,05 | KIF9                | kinesin family member 9                                                |
| 1,05 | BTC                 | betacellulin                                                           |
| 1,05 | ZNF438              | zinc finger protein 438                                                |
| 1,05 | ANKUB1              | ankyrin repeat and ubiquitin domain containing 1                       |
| 1,05 | MTSS1L              | metastasis suppressor 1-like                                           |
| 1,05 | OR2M5               | olfactory receptor, family 2, subfamily M, member 5                    |
| 1,05 | TRAPPC4;<br>MIR3656 | trafficking protein particle complex 4; microRNA 3656                  |
| 1,05 | ZNF793              | zinc finger protein 793                                                |
| 1,05 | TPRG1               | tumor protein p63 regulated 1                                          |
| 1,05 | KLF6                | Kruppel-like factor 6                                                  |
| 1,05 | HOXD3               | homeobox D3                                                            |
| 1,05 | CLK1                | CDC like kinase 1                                                      |
| 1,05 | DEFB130             | defensin, beta 130                                                     |
| 1,05 | DEFB130             | defensin, beta 130                                                     |
| 1,05 | IDH3G               | isocitrate dehydrogenase 3 (NAD <sup>+</sup> ) gamma                   |
| 1,05 | FAM136A             | family with sequence similarity 136, member A                          |
| 1,05 | RBM33               | RNA binding motif protein 33                                           |
| 1,05 | SS18                | synovial sarcoma translocation, chromosome 18                          |
| 1,05 | RGS6                | regulator of G-protein signaling 6                                     |
| 1,05 | FIGN                | fidgetin                                                               |
| 1,05 | SSX7                | synovial sarcoma, X breakpoint 7                                       |
| 1,05 | OR5M3               | olfactory receptor, family 5, subfamily M, member 3                    |
| 1,05 | FSIP2               | fibrous sheath interacting protein 2                                   |
| 1,05 | C3orf17             | chromosome 3 open reading frame 17                                     |
| 1,05 | SLC25A21            | solute carrier family 25 (mitochondrial oxoadipate carrier), member 21 |
| 1,05 | DNAJC18             | DnaJ (Hsp40) homolog, subfamily C, member 18                           |
| 1,05 | EI24                | etoposide induced 2.4                                                  |

|      |                       |                                                                                                                        |
|------|-----------------------|------------------------------------------------------------------------------------------------------------------------|
| 1,05 | CDC14A                | cell division cycle 14A                                                                                                |
| 1,05 | LUZP1                 | leucine zipper protein 1                                                                                               |
| 1,05 | ANKRD54;<br>MIR658    | ankyrin repeat domain 54; microRNA 658                                                                                 |
| 1,05 | DEK                   | DEK proto-oncogene                                                                                                     |
| 1,05 | PIK3CB                | phosphatidylinositol-4,5-bisphosphate 3-kinase,<br>catalytic subunit beta                                              |
| 1,05 | THADA                 | thyroid adenoma associated                                                                                             |
| 1,05 | OPN1MW2               | opsin 1 (cone pigments), medium-wave-sensitive 2                                                                       |
| 1,05 | PCP4                  | Purkinje cell protein 4                                                                                                |
| 1,05 | RGPD3                 | RANBP2-like and GRIP domain containing 3                                                                               |
| 1,05 | LPGAT1                | lysophosphatidylglycerol acyltransferase 1                                                                             |
| 1,05 | SLC25A3;<br>SNORA53   | solute carrier family 25 (mitochondrial carrier;<br>phosphate carrier), member 3; small nucleolar RNA,<br>H/ACA box 53 |
| 1,05 | PGM3                  | phosphoglucomutase 3                                                                                                   |
| 1,05 | AC018462.2;<br>COMMD1 | Salzman2013 ANTISENSE, coding, INTERNAL,<br>intronic, OVERLAPTX best transcript NM_152516;<br>novel transcript         |
| 1,05 | ATP6V1A               | ATPase, H <sup>+</sup> transporting, lysosomal 70kDa, V1<br>subunit A                                                  |
| 1,05 | SNAPC2                | small nuclear RNA activating complex polypeptide 2                                                                     |
| 1,05 | PRDM1                 | PR domain containing 1, with ZNF domain                                                                                |
| 1,05 | CDH13                 | cadherin 13                                                                                                            |
| 1,05 | DHH                   | desert hedgehog                                                                                                        |
| 1,05 | SLC35F5               | solute carrier family 35, member F5                                                                                    |
| 1,05 | SLC25A17              | solute carrier family 25 (mitochondrial carrier;<br>peroxisomal membrane protein, 34kDa), member 17                    |
| 1,05 | OSTF1                 | osteoclast stimulating factor 1                                                                                        |
| 1,05 | LINC01600             | long intergenic non-protein coding RNA 1600                                                                            |
| 1,05 | GPR156                | G protein-coupled receptor 156                                                                                         |
| 1,05 | GGT2                  | gamma-glutamyltransferase 2                                                                                            |
| 1,05 | RIPK1                 | receptor (TNFRSF)-interacting serine-threonine kinase<br>1                                                             |
| 1,05 | MYT1L                 | myelin transcription factor 1-like                                                                                     |
| 1,05 | GLB1; TMPPE           | galactosidase beta 1; transmembrane protein with<br>metallophosphoesterase domain                                      |
| 1,05 | HNRNPH2               | heterogeneous nuclear ribonucleoprotein H2 (H)                                                                         |
| 1,05 | C14orf169             | chromosome 14 open reading frame 169                                                                                   |
| 1,05 | SMS                   | spermine synthase                                                                                                      |
| 1,05 | CREG2                 | cellular repressor of E1A-stimulated genes 2                                                                           |
| 1,05 | ZBTB45                | zinc finger and BTB domain containing 45                                                                               |
| 1,05 | PTPRH                 | protein tyrosine phosphatase, receptor type, H                                                                         |
| 1,05 | C10orf88              | chromosome 10 open reading frame 88                                                                                    |
| 1,05 | C10orf142             | chromosome 10 open reading frame 142                                                                                   |
| 1,05 | B3GAT2                | beta-1,3-glucuronyltransferase 2                                                                                       |
| 1,05 | AMT; NICN1            | aminomethyltransferase; nicolin 1                                                                                      |
| 1,05 | PLA2G2C               | phospholipase A2, group IIC                                                                                            |
| 1,05 | FBXW4                 | F-box and WD repeat domain containing 4                                                                                |
| 1,05 | C9orf91               | chromosome 9 open reading frame 91                                                                                     |

|      |                   |                                                                              |
|------|-------------------|------------------------------------------------------------------------------|
| 1,05 | GRB7              | growth factor receptor bound protein 7                                       |
| 1,05 | UTF1              | undifferentiated embryonic cell transcription factor 1                       |
| 1,05 | PROM2             | prominin 2                                                                   |
| 1,05 | UBFD1             | ubiquitin family domain containing 1                                         |
| 1,05 | HHEX              | hematopoietically expressed homeobox                                         |
| 1,05 | WWP2              | WW domain containing E3 ubiquitin protein ligase 2                           |
| 1,05 | USP38             | ubiquitin specific peptidase 38                                              |
| 1,05 | RAB3GAP1          | RAB3 GTPase activating protein subunit 1 (catalytic)                         |
| 1,05 | FAM9A             | family with sequence similarity 9, member A                                  |
| 1,05 | PRKCDBP           | protein kinase C, delta binding protein                                      |
| 1,05 | FADD              | Fas (TNFRSF6)-associated via death domain                                    |
| 1,05 | ZNF839            | zinc finger protein 839                                                      |
| 1,05 | ERN1              | endoplasmic reticulum to nucleus signaling 1                                 |
| 1,05 | CCL3L3;<br>CCL3L1 | chemokine (C-C motif) ligand 3-like 3; chemokine (C-C motif) ligand 3-like 1 |
| 1,05 | ANO9              | anoctamin 9                                                                  |
| 1,05 | SMU1              | smu-1 suppressor of mec-8 and unc-52 homolog (C. elegans)                    |
| 1,05 | TULP1             | tubby like protein 1                                                         |
| 1,05 | RANBP3            | RAN binding protein 3                                                        |
| 1,05 | REEP5             | receptor accessory protein 5                                                 |
| 1,05 | PPP5C             | protein phosphatase 5, catalytic subunit                                     |
| 1,05 | SGEF              | Transcript Identified by AceView, Entrez Gene ID(s) 26084                    |
| 1,05 | FAM214B           | family with sequence similarity 214, member B                                |
| 1,05 | PROSER3           | proline and serine rich 3                                                    |
| 1,05 | FDXACB1           | ferredoxin-fold anticodon binding domain containing 1                        |
| 1,05 | MYPOP             | Myb-related transcription factor, partner of profilin                        |
| 1,05 | GGCT              | gamma-glutamylcyclotransferase                                               |
| 1,05 | TBC1D29           | TBC1 domain family, member 29                                                |
| 1,05 | ZNF772            | zinc finger protein 772                                                      |
| 1,05 | TIMM17A           | translocase of inner mitochondrial membrane 17 homolog A (yeast)             |
| 1,05 | TXLNG             | taxilin gamma                                                                |
| 1,05 | CD4               | CD4 molecule                                                                 |
| 1,05 | PTTG1             | pituitary tumor-transforming 1                                               |
| 1,05 | TM4SF18           | Transcript Identified by AceView, Entrez Gene ID(s) 116441                   |
| 1,05 | SPATA6L           | spermatogenesis associated 6-like                                            |
| 1,05 | MAK               | male germ cell-associated kinase                                             |
| 1,05 | MTNR1B            | melatonin receptor 1B                                                        |
| 1,05 | RFXANK            | regulatory factor X-associated ankyrin-containing protein                    |
| 1,05 | PUM1              | pumilio RNA binding family member 1                                          |
| 1,05 | OR5B21            | olfactory receptor, family 5, subfamily B, member 21                         |
| 1,05 | VGLL2             | vestigial-like family member 2                                               |
| 1,05 | YDJC              | YdjC homolog (bacterial)                                                     |
| 1,05 | KCTD8             | potassium channel tetramerization domain containing 8                        |
| 1,05 | HIF3A             | hypoxia inducible factor 3, alpha subunit                                    |

|      |                             |                                                                                                                |
|------|-----------------------------|----------------------------------------------------------------------------------------------------------------|
| 1,05 | SAA1                        | serum amyloid A1                                                                                               |
| 1,05 | SYCE1; SPRNP1               | synaptonemal complex central element protein 1;<br>shadow of prion protein homolog (zebrafish)<br>pseudogene 1 |
| 1,05 | WDR78                       | WD repeat domain 78                                                                                            |
| 1,05 | ACAA2                       | acetyl-CoA acyltransferase 2                                                                                   |
| 1,05 | TMEM221                     | transmembrane protein 221                                                                                      |
| 1,05 | PRELID1                     | PRELI domain containing 1                                                                                      |
| 1,05 | HOXB1                       | homeobox B1                                                                                                    |
| 1,05 | DND1                        | DND microRNA-mediated repression inhibitor 1                                                                   |
| 1,05 | TMEM127                     | transmembrane protein 127                                                                                      |
| 1,05 | MORN3                       | MORN repeat containing 3                                                                                       |
| 1,05 | LYSMD3                      | LysM, putative peptidoglycan-binding, domain<br>containing 3                                                   |
| 1,05 | AIMP1                       | aminoacyl tRNA synthetase complex-interacting<br>multifunctional protein 1                                     |
| 1,05 | NYAP1                       | neuronal tyrosine-phosphorylated phosphoinositide-3-<br>kinase adaptor 1                                       |
| 1,05 | COPE                        | coatamer protein complex subunit epsilon                                                                       |
| 1,05 | PARVA                       | parvin, alpha                                                                                                  |
| 1,05 | EVC                         | Ellis van Creveld protein                                                                                      |
| 1,05 | SPACA4                      | sperm acrosome associated 4                                                                                    |
| 1,05 | CCDC169-<br>SOHLH2          | CCDC169-SOHLH2 readthrough                                                                                     |
| 1,05 | WDHD1                       | WD repeat and HMG-box DNA binding protein 1                                                                    |
| 1,05 | LAMP5                       | lysosomal-associated membrane protein family,<br>member 5                                                      |
| 1,05 | PKMYT1                      | protein kinase, membrane associated tyrosine/threonine<br>1                                                    |
| 1,05 | LYPD2                       | LY6/PLAUR domain containing 2                                                                                  |
| 1,05 | PMF1; PMF1-<br>BGLAP; BGLAP | polyamine-modulated factor 1; PMF1-BGLAP<br>readthrough; bone gamma-carboxyglutamate (gla)<br>protein          |
| 1,05 | TMEM225                     | transmembrane protein 225                                                                                      |
| 1,05 | IRF8                        | interferon regulatory factor 8                                                                                 |
| 1,05 | FBP2                        | fructose-1,6-bisphosphatase 2                                                                                  |
| 1,05 | DDX3X                       | DEAD (Asp-Glu-Ala-Asp) box helicase 3, X-linked                                                                |
| 1,05 | ZDHHC13                     | zinc finger, DHHC-type containing 13                                                                           |
| 1,05 | LINC01549                   | long intergenic non-protein coding RNA 1549                                                                    |
| 1,05 | KLF17                       | Kruppel-like factor 17                                                                                         |
| 1,05 | PANK2                       | pantothenate kinase 2                                                                                          |
| 1,05 | MMGT1                       | membrane magnesium transporter 1                                                                               |
| 1,05 | LIX1                        | limb and CNS expressed 1                                                                                       |
| 1,05 | RBMS2                       | RNA binding motif, single stranded interacting protein<br>2                                                    |
| 1,05 | KRT5                        | keratin 5, type II                                                                                             |
| 1,05 | AHSA1                       | AHA1, activator of heat shock 90kDa protein ATPase<br>homolog 1 (yeast)                                        |
| 1,05 | DHX35                       | DEAH (Asp-Glu-Ala-His) box polypeptide 35                                                                      |
| 1,05 | HOXC8                       | homeobox C8                                                                                                    |

|      |                           |                                                                                                      |
|------|---------------------------|------------------------------------------------------------------------------------------------------|
| 1,05 | SLC48A1                   | solute carrier family 48 (heme transporter), member 1                                                |
| 1,05 | ARHGAP29                  | Rho GTPase activating protein 29                                                                     |
| 1,05 | HSFY2; HSFY1              | heat shock transcription factor, Y-linked 2; heat shock transcription factor, Y-linked 1             |
| 1,05 | NAT8B                     | N-acetyltransferase 8B (GCN5-related, putative, gene/pseudogene)                                     |
| 1,05 | ZNF502                    | zinc finger protein 502                                                                              |
| 1,05 | ACTG1                     | actin gamma 1                                                                                        |
| 1,05 | F8                        | coagulation factor VIII, procoagulant component                                                      |
| 1,05 | AMY2B; ACTG1P4            | amylase, alpha 2B (pancreatic); actin gamma 1 pseudogene 4                                           |
| 1,05 | SMIM8                     | small integral membrane protein 8                                                                    |
| 1,05 | EPN2; EPN2-IT1            | epsin 2; EPN2 intronic transcript 1                                                                  |
| 1,05 | C1QTNF8                   | C1q and tumor necrosis factor related protein 8                                                      |
| 1,05 | SLC25A19                  | solute carrier family 25 (mitochondrial thiamine pyrophosphate carrier), member 19                   |
| 1,05 | ZNF582-AS1                | ZNF582 antisense RNA 1 (head to head)                                                                |
| 1,05 | EXOC7; MIR6868            | exocyst complex component 7; microRNA 6868                                                           |
| 1,05 | GPR18                     | G protein-coupled receptor 18                                                                        |
| 1,05 | UBQLN3                    | ubiquilin 3                                                                                          |
| 1,05 | AMY1B; AMY1A              | amylase, alpha 1B (salivary); amylase, alpha 1A (salivary)                                           |
| 1,05 | HOXA11                    | homeobox A11                                                                                         |
| 1,05 | BAG5                      | BCL2-associated athanogene 5                                                                         |
| 1,05 | DNAJC22                   | DnaJ (Hsp40) homolog, subfamily C, member 22                                                         |
| 1,05 | ZNF528                    | zinc finger protein 528                                                                              |
| 1,05 | MOG                       | myelin oligodendrocyte glycoprotein                                                                  |
| 1,05 | ARX                       | aristaless related homeobox                                                                          |
| 1,05 | PSMA8                     | proteasome subunit alpha 8                                                                           |
| 1,05 | SVIP                      | small VCP/p97-interacting protein                                                                    |
| 1,05 | CCL8                      | chemokine (C-C motif) ligand 8                                                                       |
| 1,05 | DEFB126                   | defensin, beta 126                                                                                   |
| 1,05 | CINP                      | cyclin-dependent kinase 2 interacting protein                                                        |
| 1,05 | ARRDC2                    | arrestin domain containing 2                                                                         |
| 1,05 | ITGB1BP1                  | integrin beta 1 binding protein 1                                                                    |
| 1,05 | KAT2B                     | Transcript Identified by AceView, Entrez Gene ID(s) 8850                                             |
| 1,05 | TXNL4B                    | thioredoxin-like 4B                                                                                  |
| 1,05 | ZNF133                    | zinc finger protein 133                                                                              |
| 1,05 | TCEA1                     | transcription elongation factor A (SII), 1                                                           |
| 1,05 | GTF2H2                    | general transcription factor IIF subunit 2                                                           |
| 1,05 | NPHS2                     | nephrosis 2, idiopathic, steroid-resistant (podocin)                                                 |
| 1,05 | TECPR2                    | tectonin beta-propeller repeat containing 2                                                          |
| 1,05 | C6orf48; SNORD52; SNORD48 | chromosome 6 open reading frame 48; small nucleolar RNA, C/D box 52; small nucleolar RNA, C/D box 48 |
| 1,05 | ELMO2                     | engulfment and cell motility 2                                                                       |
| 1,05 | GPRC5D                    | G protein-coupled receptor, class C, group 5, member D                                               |

|      |                          |                                                                     |
|------|--------------------------|---------------------------------------------------------------------|
| 1,05 | GSG1L2                   | GSG1-like 2                                                         |
| 1,05 | GUCA1B                   | guanylate cyclase activator 1B (retina)                             |
| 1,05 | PANK3                    | pantothenate kinase 3                                               |
| 1,05 | FGFR3                    | fibroblast growth factor receptor 3                                 |
| 1,05 | MMP27                    | matrix metalloproteinase 27                                         |
| 1,05 | LINC00303                | long intergenic non-protein coding RNA 303                          |
| 1,05 | FGFR1OP2                 | FGFR1 oncogene partner 2                                            |
| 1,05 | SLC23A1                  | solute carrier family 23 (ascorbic acid transporter), member 1      |
| 1,05 | CTBP2                    | Transcript Identified by AceView, Entrez Gene ID(s) 1488            |
| 1,05 | GMPS                     | guanine monophosphate synthase                                      |
| 1,05 | MRVII-AS1                | MRVII antisense RNA 1                                               |
| 1,05 | BTN2A1                   | butyrophilin, subfamily 2, member A1                                |
| 1,05 | EDDM3B                   | epididymal protein 3B                                               |
| 1,05 | HDAC8                    | histone deacetylase 8                                               |
| 1,05 | KXD1                     | KxDL motif containing 1                                             |
| 1,05 | CD79B                    | CD79b molecule, immunoglobulin-associated beta                      |
| 1,05 | PPEF2                    | protein phosphatase, EF-hand calcium binding domain 2               |
| 1,05 | MMP20                    | matrix metalloproteinase 20                                         |
| 1,05 | KRT75                    | keratin 75, type II                                                 |
| 1,05 | FAF2                     | Fas associated factor family member 2                               |
| 1,05 | ZNF501                   | zinc finger protein 501 [Source:HGNC Symbol;Acc:HGNC:23717]         |
| 1,05 | RECQL                    | RecQ helicase-like                                                  |
| 1,05 | ORC3                     | origin recognition complex subunit 3                                |
| 1,05 | TMEM182                  | transmembrane protein 182                                           |
| 1,05 | LOC400553; RP11-863P13.4 | uncharacterized LOC400553; novel transcript                         |
| 1,05 | SLAMF6                   | SLAM family member 6                                                |
| 1,05 | C6orf226                 | chromosome 6 open reading frame 226                                 |
| 1,05 | ACCS                     | 1-aminocyclopropane-1-carboxylate synthase homolog (inactive)       |
| 1,05 | ZBTB21                   | zinc finger and BTB domain containing 21                            |
| 1,05 | SERPINA7                 | serpin peptidase inhibitor, clade A (alpha-1 antitrypsin), member 7 |
| 1,05 | UBTD1                    | ubiquitin domain containing 1                                       |
| 1,05 | IFRD1                    | interferon-related developmental regulator 1                        |
| 1,05 | UBQLN4                   | ubiquilin 4                                                         |
| 1,05 | CATSPER3                 | cation channel, sperm associated 3                                  |
| 1,05 | MRFAP1                   | Morf4 family associated protein 1                                   |
| 1,05 | ITGAD                    | integrin alpha D                                                    |
| 1,05 | PPP1R7                   | protein phosphatase 1, regulatory subunit 7                         |
| 1,05 | RGS11                    | regulator of G-protein signaling 11                                 |

|      |                                      |                                                                                                                                                                                                                                                                                                                                                                                                                                                                                                                                                                                                                                                                                                           |
|------|--------------------------------------|-----------------------------------------------------------------------------------------------------------------------------------------------------------------------------------------------------------------------------------------------------------------------------------------------------------------------------------------------------------------------------------------------------------------------------------------------------------------------------------------------------------------------------------------------------------------------------------------------------------------------------------------------------------------------------------------------------------|
| 1,05 | AKAP17A;<br>SFRS17A                  | Homo sapiens A kinase (PRKA) anchor protein 17A (AKAP17A), transcript variant 1, mRNA.; Homo sapiens A kinase (PRKA) anchor protein 17A (AKAP17A), transcript variant 2, non-coding RNA.; A kinase (PRKA) anchor protein 17A [Source:HGNC Symbol;Acc:HGNC:18783]; Homo sapiens splicing factor, arginine/serine-rich 17A, mRNA (cDNA clone MGC:39904 IMAGE:5217247), complete cds.; Homo sapiens splicing factor, arginine/serine-rich 17A, mRNA (cDNA clone MGC:125365 IMAGE:40007662), complete cds.; Homo sapiens splicing factor, arginine/serine-rich 17A, mRNA (cDNA clone MGC:125366 IMAGE:40007663), complete cds.; Jeck2013 ANNOTATED, INTERNAL, ncRNA, OVCODE, OVEXON best transcript NR_027383 |
| 1,05 | RAD51B                               | RAD51 paralog B                                                                                                                                                                                                                                                                                                                                                                                                                                                                                                                                                                                                                                                                                           |
| 1,05 | LIMS3L                               | LIM and senescent cell antigen-like domains 3-like                                                                                                                                                                                                                                                                                                                                                                                                                                                                                                                                                                                                                                                        |
| 1,05 | C2orf40                              | chromosome 2 open reading frame 40                                                                                                                                                                                                                                                                                                                                                                                                                                                                                                                                                                                                                                                                        |
| 1,05 | HMBS                                 | hydroxymethylbilane synthase                                                                                                                                                                                                                                                                                                                                                                                                                                                                                                                                                                                                                                                                              |
| 1,05 | SGK3                                 | serum/glucocorticoid regulated kinase family, member 3                                                                                                                                                                                                                                                                                                                                                                                                                                                                                                                                                                                                                                                    |
| 1,05 | WDR48                                | WD repeat domain 48                                                                                                                                                                                                                                                                                                                                                                                                                                                                                                                                                                                                                                                                                       |
| 1,05 | RNMTL1                               | RNA methyltransferase like 1                                                                                                                                                                                                                                                                                                                                                                                                                                                                                                                                                                                                                                                                              |
| 1,05 | ARHGAP6                              | Rho GTPase activating protein 6                                                                                                                                                                                                                                                                                                                                                                                                                                                                                                                                                                                                                                                                           |
| 1,05 | WDR86-AS1                            | WDR86 antisense RNA 1                                                                                                                                                                                                                                                                                                                                                                                                                                                                                                                                                                                                                                                                                     |
| 1,05 | GYLTL1B                              | glycosyltransferase-like 1B                                                                                                                                                                                                                                                                                                                                                                                                                                                                                                                                                                                                                                                                               |
| 1,05 | KIF2B                                | kinesin family member 2B                                                                                                                                                                                                                                                                                                                                                                                                                                                                                                                                                                                                                                                                                  |
| 1,05 | GK5                                  | glycerol kinase 5 (putative)                                                                                                                                                                                                                                                                                                                                                                                                                                                                                                                                                                                                                                                                              |
| 1,05 | CMSS1                                | cms1 ribosomal small subunit homolog (yeast)                                                                                                                                                                                                                                                                                                                                                                                                                                                                                                                                                                                                                                                              |
| 1,05 | RNF113B                              | ring finger protein 113B                                                                                                                                                                                                                                                                                                                                                                                                                                                                                                                                                                                                                                                                                  |
| 1,05 | YES1                                 | YES proto-oncogene 1, Src family tyrosine kinase                                                                                                                                                                                                                                                                                                                                                                                                                                                                                                                                                                                                                                                          |
| 1,05 | ASIC1                                | acid sensing ion channel 1                                                                                                                                                                                                                                                                                                                                                                                                                                                                                                                                                                                                                                                                                |
| 1,05 | HTR2A                                | 5-hydroxytryptamine (serotonin) receptor 2A, G protein-coupled                                                                                                                                                                                                                                                                                                                                                                                                                                                                                                                                                                                                                                            |
| 1,05 | SYDE2                                | synapse defective 1, Rho GTPase, homolog 2 (C. elegans)                                                                                                                                                                                                                                                                                                                                                                                                                                                                                                                                                                                                                                                   |
| 1,05 | ND1                                  | NADH dehydrogenase, subunit 1 (complex I)                                                                                                                                                                                                                                                                                                                                                                                                                                                                                                                                                                                                                                                                 |
| 1,05 | ZNF670;<br>ZNF695; ZNF670-<br>ZNF695 | zinc finger protein 670; zinc finger protein 695; ZNF670-ZNF695 readthrough (NMD candidate)                                                                                                                                                                                                                                                                                                                                                                                                                                                                                                                                                                                                               |
| 1,05 | YWHAQ                                | tyrosine 3-monooxygenase/tryptophan 5-monooxygenase activation protein, theta                                                                                                                                                                                                                                                                                                                                                                                                                                                                                                                                                                                                                             |
| 1,05 | DOCK2                                | dedicator of cytokinesis 2                                                                                                                                                                                                                                                                                                                                                                                                                                                                                                                                                                                                                                                                                |
| 1,05 | ANAPC1                               | anaphase promoting complex subunit 1                                                                                                                                                                                                                                                                                                                                                                                                                                                                                                                                                                                                                                                                      |
| 1,05 | NPDC1                                | neural proliferation, differentiation and control, 1                                                                                                                                                                                                                                                                                                                                                                                                                                                                                                                                                                                                                                                      |
| 1,05 | WNK2                                 | WNK lysine deficient protein kinase 2                                                                                                                                                                                                                                                                                                                                                                                                                                                                                                                                                                                                                                                                     |
| 1,05 | CCDC90B                              | coiled-coil domain containing 90B                                                                                                                                                                                                                                                                                                                                                                                                                                                                                                                                                                                                                                                                         |
| 1,05 | OR5B12                               | olfactory receptor, family 5, subfamily B, member 12                                                                                                                                                                                                                                                                                                                                                                                                                                                                                                                                                                                                                                                      |
| 1,05 | TPPP2                                | tubulin polymerization-promoting protein family member 2                                                                                                                                                                                                                                                                                                                                                                                                                                                                                                                                                                                                                                                  |

|      |                        |                                                                                              |
|------|------------------------|----------------------------------------------------------------------------------------------|
| 1,05 | GUCA2B                 | guanylate cyclase activator 2B (uroguanylin)                                                 |
| 1,05 | HNRNPF                 | Memczak2013 ALT_ACCEPTOR, ALT_DONOR, coding, INTERNAL, intronic best transcript NM_001098207 |
| 1,05 | DNMT3L                 | DNA (cytosine-5-)-methyltransferase 3-like                                                   |
| 1,05 | GABBR2                 | gamma-aminobutyric acid (GABA) B receptor, 2                                                 |
| 1,05 | PSMB2                  | proteasome subunit beta 2                                                                    |
| 1,05 | C8orf31                | chromosome 8 open reading frame 31                                                           |
| 1,05 | CFAP20                 | cilia and flagella associated protein 20                                                     |
| 1,05 | KRT86                  | keratin 86, type II                                                                          |
| 1,05 | CNTLN                  | Transcript Identified by AceView, Entrez Gene ID(s) 54875                                    |
| 1,05 | LPCAT3                 | lysophosphatidylcholine acyltransferase 3                                                    |
| 1,05 | C14orf119              | chromosome 14 open reading frame 119                                                         |
| 1,05 | DHRS4L2                | dehydrogenase/reductase (SDR family) member 4 like 2                                         |
| 1,05 | TAF1A                  | TATA box binding protein (TBP)-associated factor, RNA polymerase I, A, 48kDa                 |
| 1,05 | UBE2D2                 | ubiquitin conjugating enzyme E2D 2                                                           |
| 1,05 | VOPPI                  | vesicular, overexpressed in cancer, prosurvival protein 1                                    |
| 1,05 | NCS1                   | neuronal calcium sensor 1                                                                    |
| 1,05 | TMC6                   | transmembrane channel like 6                                                                 |
| 1,05 | CPT2                   | carnitine palmitoyltransferase 2                                                             |
| 1,05 | DIMT1                  | DIM1 dimethyladenosine transferase 1 homolog                                                 |
| 1,05 | LYPD4                  | LY6/PLAUR domain containing 4                                                                |
| 1,05 | GSTK1                  | glutathione S-transferase kappa 1                                                            |
| 1,05 | OR8G5                  | olfactory receptor, family 8, subfamily G, member 5                                          |
| 1,05 | CLEC4G                 | C-type lectin domain family 4, member G                                                      |
| 1,05 | HIST1H4E               | histone cluster 1, H4e                                                                       |
| 1,05 | PRIMPOL                | primase and DNA directed polymerase                                                          |
| 1,05 | OR4N2                  | olfactory receptor, family 4, subfamily N, member 2                                          |
| 1,05 | SPHK2                  | sphingosine kinase 2                                                                         |
| 1,05 | CEBPG                  | CCAAT/enhancer binding protein (C/EBP), gamma                                                |
| 1,05 | LOC101927844; serfawbu | uncharacterized LOC101927844; Transcript Identified by AceView                               |
| 1,05 | MYO1E                  | myosin IE                                                                                    |
| 1,05 | PSMD5                  | proteasome 26S subunit, non-ATPase 5                                                         |
| 1,05 | ABHD13                 | abhydrolase domain containing 13                                                             |
| 1,05 | SCN7A                  | sodium channel, voltage gated, type VII alpha subunit                                        |
| 1,05 | UBQLN1                 | ubiquilin 1                                                                                  |
| 1,05 | KRTCAP2                | keratinocyte associated protein 2                                                            |
| 1,05 | COMT; MIR4761          | catechol-O-methyltransferase; microRNA 4761                                                  |
| 1,05 | NDOR1                  | NADPH dependent diflavin oxidoreductase 1                                                    |
| 1,05 | GATA1                  | GATA binding protein 1 (globin transcription factor 1)                                       |
| 1,05 | KLHL1                  | kelch-like family member 1                                                                   |
| 1,05 | BAG4                   | BCL2-associated athanogene 4                                                                 |
| 1,05 | TUBA3D                 | tubulin, alpha 3d                                                                            |

|      |                             |                                                                                                                                   |
|------|-----------------------------|-----------------------------------------------------------------------------------------------------------------------------------|
| 1,05 | TTC1                        | Transcript Identified by AceView, Entrez Gene ID(s)<br>7265                                                                       |
| 1,05 | PTOV1;<br>MIR4749           | prostate tumor overexpressed 1; microRNA 4749                                                                                     |
| 1,05 | SH3GL1                      | SH3-domain GRB2-like 1                                                                                                            |
| 1,05 | PRAMEF25                    | PRAME family member 25                                                                                                            |
| 1,05 | GPAA1                       | glycosylphosphatidylinositol anchor attachment 1                                                                                  |
| 1,05 | TAF5L                       | TAF5-like RNA polymerase II, p300/CBP-associated<br>factor (PCAF)-associated factor, 65kDa                                        |
| 1,05 | TCL1A                       | T-cell leukemia/lymphoma 1A                                                                                                       |
| 1,05 | EIF5                        | eukaryotic translation initiation factor 5                                                                                        |
| 1,05 | FMNL1                       | formin like 1                                                                                                                     |
| 1,05 | TMED5                       | transmembrane p24 trafficking protein 5                                                                                           |
| 1,05 | STRADA                      | STE20-related kinase adaptor alpha                                                                                                |
| 1,05 | SLC47A1                     | solute carrier family 47 (multidrug and toxin<br>extrusion), member 1                                                             |
| 1,05 | KRT18P55                    | keratin 18 pseudogene 55                                                                                                          |
| 1,05 | TCEAL1                      | transcription elongation factor A (SII)-like 1                                                                                    |
| 1,05 | RBM23                       | RNA binding motif protein 23                                                                                                      |
| 1,05 | RNFT2                       | ring finger protein, transmembrane 2                                                                                              |
| 1,05 | KLHL17                      | kelch-like family member 17                                                                                                       |
| 1,05 | UBE2E1                      | ubiquitin conjugating enzyme E2E 1                                                                                                |
| 1,05 | TCHHL1                      | trichohyalin like 1                                                                                                               |
| 1,05 | BNC1                        | basonuclin 1                                                                                                                      |
| 1,05 | TAS2R38                     | taste receptor, type 2, member 38                                                                                                 |
| 1,05 | DYNLL1                      | dynein, light chain, LC8-type 1                                                                                                   |
| 1,05 | GLA                         | galactosidase, alpha                                                                                                              |
| 1,05 | OR1D2                       | olfactory receptor, family 1, subfamily D, member 2                                                                               |
| 1,05 | NUFIP2; rerdy               | Memczak2013 ALT_ACCEPTOR, ALT_DONOR,<br>coding, INTERNAL, intronic best transcript<br>NM_020772; Transcript Identified by AceView |
| 1,05 | PPP2R5C                     | protein phosphatase 2, regulatory subunit B, gamma                                                                                |
| 1,05 | TMEM54                      | transmembrane protein 54                                                                                                          |
| 1,05 | SLC35G1                     | solute carrier family 35, member G1                                                                                               |
| 1,05 | KLF5                        | Kruppel-like factor 5 (intestinal)                                                                                                |
| 1,05 | PECR                        | peroxisomal trans-2-enoyl-CoA reductase                                                                                           |
| 1,05 | AP5B1                       | adaptor-related protein complex 5, beta 1 subunit                                                                                 |
| 1,05 | NIPAL1                      | NIPA-like domain containing 1                                                                                                     |
| 1,05 | NF2                         | neurofibromin 2 (merlin)                                                                                                          |
| 1,05 | LOC100287036;<br>AC137932.6 | uncharacterized LOC100287036; novel transcript,<br>antisense to ANKRD11                                                           |
| 1,05 | RAX2                        | retina and anterior neural fold homeobox 2                                                                                        |
| 1,05 | ZC3HC1                      | zinc finger, C3HC-type containing 1                                                                                               |
| 1,05 | QTRTD1                      | queuine tRNA-ribosyltransferase domain containing 1                                                                               |
| 1,05 | ZNF845                      | zinc finger protein 845                                                                                                           |
| 1,05 | RPAP3                       | RNA polymerase II associated protein 3                                                                                            |
| 1,05 | FXN                         | frataxin                                                                                                                          |
| 1,05 | SNX31                       | sorting nexin 31                                                                                                                  |
| 1,05 | TSPAN14                     | tetraspanin 14                                                                                                                    |
| 1,05 | PABPC5                      | poly(A) binding protein, cytoplasmic 5                                                                                            |

|      |                       |                                                                                       |
|------|-----------------------|---------------------------------------------------------------------------------------|
| 1,05 | SLC17A5               | solute carrier family 17 (acidic sugar transporter), member 5                         |
| 1,05 | WBP2NL                | WBP2 N-terminal like                                                                  |
| 1,05 | TMED3                 | transmembrane p24 trafficking protein 3                                               |
| 1,05 | STK10                 | serine/threonine kinase 10                                                            |
| 1,05 | ALOX5                 | arachidonate 5-lipoxygenase                                                           |
| 1,05 | NUDT21                | nudix hydrolase 21                                                                    |
| 1,05 | OR5H14                | olfactory receptor, family 5, subfamily H, member 14                                  |
| 1,05 | HPX                   | hemopexin                                                                             |
| 1,05 | IGBP1                 | immunoglobulin (CD79A) binding protein 1                                              |
| 1,05 | HSPA1A;<br>HSPA1B     | heat shock 70kDa protein 1A; heat shock 70kDa protein 1B                              |
| 1,05 | POGLUT1               | protein O-glucosyltransferase 1                                                       |
| 1,05 | ZMYM5                 | zinc finger, MYM-type 5                                                               |
| 1,05 | KRTAP1-3              | keratin associated protein 1-3                                                        |
| 1,05 | ERO1A                 | endoplasmic reticulum oxidoreductase alpha                                            |
| 1,05 | ZNF248                | zinc finger protein 248                                                               |
| 1,05 | EIF2A                 | eukaryotic translation initiation factor 2A, 65kDa                                    |
| 1,05 | RGPD1; RGPD2          | RANBP2-like and GRIP domain containing 1;<br>RANBP2-like and GRIP domain containing 2 |
| 1,05 | TMA16                 | translation machinery associated 16 homolog                                           |
| 1,05 | GFOD2                 | glucose-fructose oxidoreductase domain containing 2                                   |
| 1,05 | DENND2C               | DENN/MADD domain containing 2C                                                        |
| 1,05 | RP1-122P22.2;<br>RIN2 | novel transcript; Transcript Identified by AceView,<br>Entrez Gene ID(s) 54453        |
| 1,05 | ADGRG6                | adhesion G protein-coupled receptor G6                                                |
| 1,05 | CCNB1                 | cyclin B1                                                                             |
| 1,05 | SLC26A11              | solute carrier family 26 (anion exchanger), member 11                                 |
| 1,05 | IL18BP                | interleukin 18 binding protein                                                        |
| 1,05 | ZNF571                | zinc finger protein 571                                                               |
| 1,05 | C20orf96              | chromosome 20 open reading frame 96                                                   |
| 1,05 | SLC6A15               | solute carrier family 6 (neutral amino acid transporter), member 15                   |
| 1,05 | AP1S3                 | adaptor-related protein complex 1 sigma 3 subunit                                     |
| 1,05 | KDELRL1               | KDEL (Lys-Asp-Glu-Leu) endoplasmic reticulum protein retention receptor 1             |
| 1,05 | DMPK                  | dystrophia myotonica-protein kinase                                                   |
| 1,05 | ARL6IP5               | ADP-ribosylation factor like GTPase 6 interacting protein 5                           |
| 1,05 | NSUN3                 | Transcript Identified by AceView, Entrez Gene ID(s) 63899                             |
| 1,05 | RASGEF1A              | RasGEF domain family member 1A                                                        |
| 1,05 | CENPL                 | centromere protein L                                                                  |
| 1,05 | SUPT16H               | SPT16 homolog, facilitates chromatin remodeling subunit                               |
| 1,05 | ACACB                 | acetyl-CoA carboxylase beta                                                           |
| 1,05 | SLC13A1               | solute carrier family 13 (sodium/sulfate symporter), member 1                         |
| 1,05 | TNFAIP8               | tumor necrosis factor, alpha-induced protein 8                                        |

|      |                              |                                                                                                        |
|------|------------------------------|--------------------------------------------------------------------------------------------------------|
| 1,05 | FABP5                        | fatty acid binding protein 5 (psoriasis-associated)                                                    |
| 1,05 | PADI4                        | peptidyl arginine deiminase, type IV                                                                   |
| 1,05 | DUSP11                       | dual specificity phosphatase 11                                                                        |
| 1,05 | TUBA1B                       | tubulin, alpha 1b                                                                                      |
| 1,05 | RPL5;<br>SNORD21;<br>SNORA66 | ribosomal protein L5; small nucleolar RNA, C/D box 21; small nucleolar RNA, H/ACA box 66               |
| 1,05 | MICAL2                       | microtubule associated monooxygenase, calponin and LIM domain containing 2                             |
| 1,05 | ULK2                         | unc-51 like autophagy activating kinase 2                                                              |
| 1,05 | XRCC5                        | X-ray repair complementing defective repair in Chinese hamster cells 5 (double-strand-break rejoining) |
| 1,05 | JUN                          | jun proto-oncogene                                                                                     |
| 1,05 | PLP1                         | proteolipid protein 1                                                                                  |
| 1,05 | RAB2B                        | RAB2B, member RAS oncogene family                                                                      |
| 1,05 | SYT9                         | synaptotagmin IX                                                                                       |
| 1,05 | PLEKHJ1;<br>MIR6789          | pleckstrin homology domain containing, family J member 1; microRNA 6789                                |
| 1,05 | APH1B                        | APH1B gamma secretase subunit                                                                          |
| 1,05 | SNAI2                        | snail family zinc finger 2                                                                             |
| 1,05 | TK2                          | thymidine kinase 2, mitochondrial                                                                      |
| 1,05 | AMIGO3                       | adhesion molecule with Ig-like domain 3                                                                |
| 1,05 | CACFD1                       | calcium channel flower domain containing 1                                                             |
| 1,05 | OMG                          | oligodendrocyte myelin glycoprotein                                                                    |
| 1,05 | ULK4                         | unc-51 like kinase 4                                                                                   |
| 1,05 | PTBP1; MIR4745               | polypyrimidine tract binding protein 1; microRNA 4745                                                  |
| 1,05 | HSPA9                        | heat shock 70kDa protein 9 (mortalin)                                                                  |
| 1,05 | BEST4                        | bestrophin 4                                                                                           |
| 1,05 | CCT2                         | chaperonin containing TCP1, subunit 2 (beta)                                                           |
| 1,05 | BPHL                         | biphenyl hydrolase-like (serine hydrolase)                                                             |
| 1,05 | CCDC57                       | coiled-coil domain containing 57                                                                       |
| 1,05 | CLEC18C                      | C-type lectin domain family 18, member C                                                               |
| 1,05 | BLACE                        | B-cell acute lymphoblastic leukemia expressed                                                          |
| 1,05 | GPX2                         | glutathione peroxidase 2                                                                               |
| 1,05 | TMTC3                        | transmembrane and tetratricopeptide repeat containing 3                                                |
| 1,05 | ACAD11                       | acyl-CoA dehydrogenase family, member 11                                                               |
| 1,05 | TNXB                         | tenascin XB                                                                                            |
| 1,05 | GABRB3                       | gamma-aminobutyric acid (GABA) A receptor, beta 3                                                      |
| 1,05 | PIGL                         | phosphatidylinositol glycan anchor biosynthesis class L                                                |
| 1,05 | GDI2                         | GDP dissociation inhibitor 2                                                                           |
| 1,05 | IL1B                         | interleukin 1 beta                                                                                     |
| 1,05 | APLNR                        | apelin receptor                                                                                        |
| 1,05 | ARHGAP15                     | Memczak2013 ALT_ACCEPTOR, ALT_DONOR, coding, INTERNAL, intronic best transcript NM_018460              |
| 1,05 | AVPI1                        | arginine vasopressin-induced 1                                                                         |

|      |                                   |                                                                                                          |
|------|-----------------------------------|----------------------------------------------------------------------------------------------------------|
| 1,05 | CPLX3                             | complexin 3                                                                                              |
| 1,05 | NECAP1                            | NECAP endocytosis associated 1                                                                           |
| 1,05 | VWA7                              | von Willebrand factor A domain containing 7                                                              |
| 1,05 | TMED7-TICAM2;<br>TICAM2;<br>TMED7 | TMED7-TICAM2 readthrough; toll-like receptor adaptor molecule 2; transmembrane p24 trafficking protein 7 |
| 1,05 | BRD3                              | bromodomain containing 3                                                                                 |
| 1,05 | RNF165                            | ring finger protein 165                                                                                  |
| 1,05 | MYADM                             | Memczak2013 ANTISENSE, CDS, coding, INTERNAL best transcript NM_001020819                                |
| 1,05 | CCDC84                            | coiled-coil domain containing 84                                                                         |
| 1,05 | BAX                               | BCL2-associated X protein                                                                                |
| 1,05 | SIMC1                             | SUMO-interacting motifs containing 1                                                                     |
| 1,05 | UBE2Z                             | ubiquitin-conjugating enzyme E2Z                                                                         |
| 1,05 | IQCF1                             | IQ motif containing F1                                                                                   |
| 1,05 | TSPO2                             | translocator protein 2                                                                                   |
| 1,05 | BRK1                              | BRICK1, SCAR/WAVE actin-nucleating complex subunit                                                       |
| 1,05 | NPTX2                             | neuronal pentraxin II                                                                                    |
| 1,05 | OR52H1                            | olfactory receptor, family 52, subfamily H, member 1                                                     |
| 1,05 | VPS54                             | vacuolar protein sorting 54 homolog (S. cerevisiae)                                                      |
| 1,05 | RAB7B                             | RAB7B, member RAS oncogene family                                                                        |
| 1,05 | ABCD4                             | ATP binding cassette subfamily D member 4                                                                |
| 1,05 | SH2B3                             | Transcript Identified by AceView, Entrez Gene ID(s) 10019                                                |
| 1,05 | CLEC2B                            | C-type lectin domain family 2, member B                                                                  |
| 1,05 | METTL10                           | methyltransferase like 10                                                                                |
| 1,05 | UBL7                              | ubiquitin-like 7                                                                                         |
| 1,05 | RMI1                              | RecQ mediated genome instability 1                                                                       |
| 1,05 | PPA1                              | pyrophosphatase (inorganic) 1                                                                            |
| 1,05 | P2RX4                             | purinergic receptor P2X, ligand gated ion channel, 4                                                     |
| 1,05 | TMEM151B                          | transmembrane protein 151B                                                                               |
| 1,05 | MARCH10                           | membrane associated ring finger 10                                                                       |
| 1,05 | HSPE1                             | heat shock 10kDa protein 1                                                                               |
| 1,05 | EOGT                              | EGF domain-specific O-linked N-acetylglucosamine (GlcNAc) transferase                                    |
| 1,05 | ADAMTS5                           | ADAM metalloproteinase with thrombospondin type 1 motif 5                                                |
| 1,05 | DIABLO                            | diablo, IAP-binding mitochondrial protein                                                                |
| 1,04 | FAM8A1                            | family with sequence similarity 8, member A1                                                             |
| 1,04 | STYXL1                            | serine/threonine/tyrosine interacting-like 1                                                             |
| 1,04 | SLC5A5                            | solute carrier family 5 (sodium/iodide cotransporter), member 5                                          |
| 1,04 | CYP2F1                            | cytochrome P450, family 2, subfamily F, polypeptide 1                                                    |
| 1,04 | SPIN1                             | spindlin 1                                                                                               |
| 1,04 | YIF1B                             | Yip1 interacting factor homolog B (S. cerevisiae)                                                        |
| 1,04 | SGMS2                             | sphingomyelin synthase 2                                                                                 |

|      |              |                                                                                                                              |
|------|--------------|------------------------------------------------------------------------------------------------------------------------------|
| 1,04 | KDELR2       | KDEL (Lys-Asp-Glu-Leu) endoplasmic reticulum protein retention receptor 2                                                    |
| 1,04 | ENPP2        | ectonucleotide pyrophosphatase/phosphodiesterase 2                                                                           |
| 1,04 | JPH2         | junctophilin 2                                                                                                               |
| 1,04 | E2F1         | Memczak2013 ANTISENSE, coding, INTERNAL, intronic best transcript NM_005225                                                  |
| 1,04 | UBE2G2       | ubiquitin conjugating enzyme E2G 2                                                                                           |
| 1,04 | THUMPD2      | THUMP domain containing 2                                                                                                    |
| 1,04 | OR2L13       | olfactory receptor, family 2, subfamily L, member 13                                                                         |
| 1,04 | PSAPL1       | prosaposin-like 1 (gene/pseudogene)                                                                                          |
| 1,04 | HRSP12       | heat-responsive protein 12                                                                                                   |
| 1,04 | EXOSC8       | exosome component 8                                                                                                          |
| 1,04 | PRKCI        | protein kinase C, iota                                                                                                       |
| 1,04 | WFDC10A      | WAP four-disulfide core domain 10A                                                                                           |
| 1,04 | SUPT5H       | SPT5 homolog, DSIF elongation factor subunit                                                                                 |
| 1,04 | CD53         | CD53 molecule                                                                                                                |
| 1,04 | ATG16L1      | autophagy related 16-like 1                                                                                                  |
| 1,04 | MAP3K6       | mitogen-activated protein kinase kinase kinase 6                                                                             |
| 1,04 | PPCDC        | phosphopantothencysteine decarboxylase                                                                                       |
| 1,04 | CCDC188      | coiled-coil domain containing 188                                                                                            |
| 1,04 | BAK1         | BCL2-antagonist/killer 1                                                                                                     |
| 1,04 | NLRP10       | NLR family, pyrin domain containing 10                                                                                       |
| 1,04 | PCSK1N       | proprotein convertase subtilisin/kexin type 1 inhibitor                                                                      |
| 1,04 | DGCR5; DGCR9 | DiGeorge syndrome critical region gene 5 (non-protein coding); DiGeorge syndrome critical region gene 9 (non-protein coding) |
| 1,04 | ZNF584       | zinc finger protein 584                                                                                                      |
| 1,04 | TOMM5        | translocase of outer mitochondrial membrane 5 homolog (yeast)                                                                |
| 1,04 | CCNK         | cyclin K                                                                                                                     |
| 1,04 | CACNG3       | calcium channel, voltage-dependent, gamma subunit 3                                                                          |
| 1,04 | CCNG1        | cyclin G1                                                                                                                    |
| 1,04 | HERC6        | HECT and RLD domain containing E3 ubiquitin protein ligase family member 6                                                   |
| 1,04 | ZBTB47       | zinc finger and BTB domain containing 47                                                                                     |
| 1,04 | AHR          | aryl hydrocarbon receptor                                                                                                    |
| 1,04 | RAD51D       | RAD51 paralog D                                                                                                              |
| 1,04 | MAFG         | v-maf avian musculoaponeurotic fibrosarcoma oncogene homolog G                                                               |
| 1,04 | PCP2         | Purkinje cell protein 2                                                                                                      |
| 1,04 | FNDC8        | fibronectin type III domain containing 8                                                                                     |
| 1,04 | ABCG4        | ATP binding cassette subfamily G member 4                                                                                    |
| 1,04 | IRGC         | immunity-related GTPase family, cinema                                                                                       |
| 1,04 | SLC22A12     | solute carrier family 22 (organic anion/urate transporter), member 12                                                        |
| 1,04 | CLEC3A       | C-type lectin domain family 3, member A                                                                                      |
| 1,04 | ANAPC13      | anaphase promoting complex subunit 13                                                                                        |
| 1,04 | RSC1A1; DDI2 | regulatory solute carrier protein, family 1, member 1; DNA-damage inducible 1 homolog 2                                      |

|      |                                |                                                                                                                        |
|------|--------------------------------|------------------------------------------------------------------------------------------------------------------------|
| 1,04 | RPL27A;<br>SNORA3A;<br>SNORA3B | ribosomal protein L27a; small nucleolar RNA, H/ACA box 3A; small nucleolar RNA, H/ACA box 3B                           |
| 1,04 | MYH6                           | myosin, heavy chain 6, cardiac muscle, alpha                                                                           |
| 1,04 | EFCAB8                         | EF-hand calcium binding domain 8                                                                                       |
| 1,04 | RDH13                          | retinol dehydrogenase 13 (all-trans/9-cis)                                                                             |
| 1,04 | CSK                            | c-src tyrosine kinase                                                                                                  |
| 1,04 | SLC25A23                       | solute carrier family 25 (mitochondrial carrier; phosphate carrier), member 23                                         |
| 1,04 | RLN3                           | relaxin 3                                                                                                              |
| 1,04 | CPNE3                          | copine III                                                                                                             |
| 1,04 | TEX261                         | testis expressed 261                                                                                                   |
| 1,04 | APOA2                          | apolipoprotein A-II                                                                                                    |
| 1,04 | NCLN                           | nicalin                                                                                                                |
| 1,04 | ZNF213                         | zinc finger protein 213                                                                                                |
| 1,04 | EEFSEC                         | eukaryotic elongation factor, selenocysteine-tRNA-specific                                                             |
| 1,04 | PSENEN                         | presenilin enhancer gamma secretase subunit                                                                            |
| 1,04 | STEAP1B                        | STEAP family member 1B                                                                                                 |
| 1,04 | ABHD12                         | abhydrolase domain containing 12                                                                                       |
| 1,04 | EFNB1                          | ephrin-B1                                                                                                              |
| 1,04 | DRP2                           | dystrophin related protein 2                                                                                           |
| 1,04 | COL5A2                         | collagen, type V, alpha 2                                                                                              |
| 1,04 | HPCAL4                         | hippocalcin like 4                                                                                                     |
| 1,04 | E2F8                           | E2F transcription factor 8                                                                                             |
| 1,04 | C6orf62                        | chromosome 6 open reading frame 62                                                                                     |
| 1,04 | ZNF274                         | Memczak2013 ANTISENSE, CDS, coding, INTERNAL best transcript NM_133502                                                 |
| 1,04 | BVES-AS1                       | BVES antisense RNA 1                                                                                                   |
| 1,04 | USP12                          | Transcript Identified by AceView, Entrez Gene ID(s) 219333                                                             |
| 1,04 | PPID                           | peptidylprolyl isomerase D                                                                                             |
| 1,04 | C10orf128                      | chromosome 10 open reading frame 128                                                                                   |
| 1,04 | LRRC58                         | leucine rich repeat containing 58                                                                                      |
| 1,04 | MSR1                           | macrophage scavenger receptor 1                                                                                        |
| 1,04 | ASIC5                          | acid sensing ion channel family member 5                                                                               |
| 1,04 | HNRNPH3                        | heterogeneous nuclear ribonucleoprotein H3 (2H9)                                                                       |
| 1,04 | TTC39B                         | Transcript Identified by AceView, Entrez Gene ID(s) 158219                                                             |
| 1,04 | ANKRD23                        | ankyrin repeat domain 23                                                                                               |
| 1,04 | SLC34A3                        | solute carrier family 34 (type II sodium/phosphate cotransporter), member 3                                            |
| 1,04 | CAMK2B                         | calcium/calmodulin-dependent protein kinase II beta                                                                    |
| 1,04 | KCNA6;<br>GALNT8               | potassium channel, voltage gated shaker related subfamily A, member 6; polypeptide N-acetylgalactosaminyltransferase 8 |
| 1,04 | DAZ2; DAZ4                     | deleted in azoospermia 2; deleted in azoospermia 4                                                                     |
| 1,04 | NAT16                          | N-acetyltransferase 16 (GCN5-related, putative)                                                                        |
| 1,04 | SPEF2                          | sperm flagellar 2                                                                                                      |

|      |                                                                                                                      |                                                                                                                                                                                                                                                                                                                                                                                                                                                                                                                           |
|------|----------------------------------------------------------------------------------------------------------------------|---------------------------------------------------------------------------------------------------------------------------------------------------------------------------------------------------------------------------------------------------------------------------------------------------------------------------------------------------------------------------------------------------------------------------------------------------------------------------------------------------------------------------|
| 1,04 | TFAP4                                                                                                                | transcription factor AP-4 (activating enhancer binding protein 4)                                                                                                                                                                                                                                                                                                                                                                                                                                                         |
| 1,04 | DEFB115                                                                                                              | defensin, beta 115                                                                                                                                                                                                                                                                                                                                                                                                                                                                                                        |
| 1,04 | CCDC144NL-AS1                                                                                                        | CCDC144NL antisense RNA 1                                                                                                                                                                                                                                                                                                                                                                                                                                                                                                 |
| 1,04 | OR2G2                                                                                                                | olfactory receptor, family 2, subfamily G, member 2                                                                                                                                                                                                                                                                                                                                                                                                                                                                       |
| 1,04 | BPIFC                                                                                                                | BPI fold containing family C                                                                                                                                                                                                                                                                                                                                                                                                                                                                                              |
| 1,04 | HOXD9                                                                                                                | homeobox D9                                                                                                                                                                                                                                                                                                                                                                                                                                                                                                               |
| 1,04 | KIAA0513                                                                                                             | KIAA0513                                                                                                                                                                                                                                                                                                                                                                                                                                                                                                                  |
| 1,04 | CCKAR                                                                                                                | cholecystokinin A receptor                                                                                                                                                                                                                                                                                                                                                                                                                                                                                                |
| 1,04 | DNAAF3                                                                                                               | dynein, axonemal, assembly factor 3                                                                                                                                                                                                                                                                                                                                                                                                                                                                                       |
| 1,04 | NCKAP1                                                                                                               | NCK-associated protein 1                                                                                                                                                                                                                                                                                                                                                                                                                                                                                                  |
| 1,04 | LRRC74B                                                                                                              | leucine rich repeat containing 74B                                                                                                                                                                                                                                                                                                                                                                                                                                                                                        |
| 1,04 | SLC9A3                                                                                                               | solute carrier family 9, subfamily A (NHE3, cation proton antiporter 3), member 3                                                                                                                                                                                                                                                                                                                                                                                                                                         |
| 1,04 | CCL23                                                                                                                | chemokine (C-C motif) ligand 23                                                                                                                                                                                                                                                                                                                                                                                                                                                                                           |
| 1,04 | HIST1H3D;<br>HIST1H2AD                                                                                               | histone cluster 1, H3d; histone cluster 1, H2ad                                                                                                                                                                                                                                                                                                                                                                                                                                                                           |
| 1,04 | DTNBP1                                                                                                               | dystrobrevin binding protein 1                                                                                                                                                                                                                                                                                                                                                                                                                                                                                            |
| 1,04 | ZNF837                                                                                                               | zinc finger protein 837                                                                                                                                                                                                                                                                                                                                                                                                                                                                                                   |
| 1,04 | HHAT                                                                                                                 | hedgehog acyltransferase                                                                                                                                                                                                                                                                                                                                                                                                                                                                                                  |
| 1,04 | KRT85                                                                                                                | keratin 85, type II                                                                                                                                                                                                                                                                                                                                                                                                                                                                                                       |
| 1,04 | UNC5D                                                                                                                | unc-5 netrin receptor D                                                                                                                                                                                                                                                                                                                                                                                                                                                                                                   |
| 1,04 | BBX                                                                                                                  | bobby sox homolog (Drosophila)                                                                                                                                                                                                                                                                                                                                                                                                                                                                                            |
| 1,04 | AGBL4                                                                                                                | ATP/GTP binding protein-like 4                                                                                                                                                                                                                                                                                                                                                                                                                                                                                            |
| 1,04 | CRLF3                                                                                                                | Memczak2013 ALT_ACCEPTOR, ALT_DONOR, coding, INTERNAL, intronic best transcript NM_015986                                                                                                                                                                                                                                                                                                                                                                                                                                 |
| 1,04 | RAD23A                                                                                                               | RAD23 homolog A, nucleotide excision repair protein                                                                                                                                                                                                                                                                                                                                                                                                                                                                       |
| 1,04 | ACOT8                                                                                                                | acyl-CoA thioesterase 8                                                                                                                                                                                                                                                                                                                                                                                                                                                                                                   |
| 1,04 | HIVEP2                                                                                                               | Jeck2013 ALT_ACCEPTOR, ALT_DONOR, coding, INTERNAL, intronic best transcript NM_006734                                                                                                                                                                                                                                                                                                                                                                                                                                    |
| 1,04 | MED23                                                                                                                | mediator complex subunit 23                                                                                                                                                                                                                                                                                                                                                                                                                                                                                               |
| 1,04 | C6orf191andARH<br>GAP18; RP1-<br>69D17.4; RP1-<br>69D17.3;<br>TCONS_12_0002<br>5470;<br>TCONS_12_0002<br>4911; LAMA2 | Transcript Identified by AceView, Entrez Gene ID(s) 93663; 253582; Jeck2013 ALT_ACCEPTOR, ALT_DONOR, downstream_end, ncRNA, OVEXON, upstream_start best transcript TCONS_12_00025470; Jeck2013 ALT_ACCEPTOR, ncRNA, OVEXON, upstream_start best transcript TCONS_12_00024911; Salzman2013 ANTISENSE, CDS, coding, downstream_end, intronic, OVCODE, OVEXON, UTR3 best transcript NM_000426; Salzman2013 ANNOTATED, INTERNAL, ncRNA, OVEXON best transcript TCONS_12_00025470; putative novel transcript; novel transcript |
| 1,04 | LINC00266-1                                                                                                          | long intergenic non-protein coding RNA 266-1                                                                                                                                                                                                                                                                                                                                                                                                                                                                              |
| 1,04 | NKX6-1                                                                                                               | NK6 homeobox 1                                                                                                                                                                                                                                                                                                                                                                                                                                                                                                            |
| 1,04 | NBPF4                                                                                                                | neuroblastoma breakpoint family, member 4                                                                                                                                                                                                                                                                                                                                                                                                                                                                                 |
| 1,04 | TRANK1                                                                                                               | tetratricopeptide repeat and ankyrin repeat containing 1                                                                                                                                                                                                                                                                                                                                                                                                                                                                  |

|      |                                 |                                                                                                         |
|------|---------------------------------|---------------------------------------------------------------------------------------------------------|
| 1,04 | PPP1R16B                        | protein phosphatase 1, regulatory subunit 16B                                                           |
| 1,04 | ASAP1                           | Memczak2013 ALT_ACCEPTOR, ALT_DONOR, coding, INTERNAL, intronic best transcript NM_018482               |
| 1,04 | APIP                            | Transcript Identified by AceView, Entrez Gene ID(s) 51074                                               |
| 1,04 | DNAJB3                          | DnaJ (Hsp40) homolog, subfamily B, member 3                                                             |
| 1,04 | AKAP8                           | A kinase (PRKA) anchor protein 8                                                                        |
| 1,04 | NASP                            | Zhang2013 ALT_DONOR, coding, INTERNAL, intronic best transcript NM_002482                               |
| 1,04 | CHST2                           | carbohydrate (N-acetylglucosamine-6-O) sulfotransferase 2                                               |
| 1,04 | ZNF347                          | zinc finger protein 347                                                                                 |
| 1,04 | PPAT                            | phosphoribosyl pyrophosphate amidotransferase                                                           |
| 1,04 | MMP2                            | matrix metalloproteinase 2                                                                              |
| 1,04 | SNORA17A;<br>SNORA17B;<br>SNHG7 | small nucleolar RNA, H/ACA box 17A; small nucleolar RNA, H/ACA box 17B; small nucleolar RNA host gene 7 |
| 1,04 | PGD                             | phosphogluconate dehydrogenase                                                                          |
| 1,04 | SPANXA2                         | SPANX family, member A2                                                                                 |
| 1,04 | LGMN                            | legumain                                                                                                |
| 1,04 | SPDYE5                          | speedy/RINGO cell cycle regulator family member E5                                                      |
| 1,04 | LIX1L                           | limb and CNS expressed 1 like                                                                           |
| 1,04 | MMP7                            | matrix metalloproteinase 7                                                                              |
| 1,04 | TUBB4B                          | tubulin, beta 4B class IVb                                                                              |
| 1,04 | FAM71E1                         | family with sequence similarity 71, member E1                                                           |
| 1,04 | BCKDHA                          | branched chain keto acid dehydrogenase E1, alpha polypeptide                                            |
| 1,04 | N4BP2L1                         | NEDD4 binding protein 2-like 1                                                                          |
| 1,04 | LINC00243                       | long intergenic non-protein coding RNA 243                                                              |
| 1,04 | SPATA31C1                       | SPATA31 subfamily C, member 1                                                                           |
| 1,04 | CCDC84                          | coiled-coil domain containing 84                                                                        |
| 1,04 | MCM3AP-AS1                      | MCM3AP antisense RNA 1                                                                                  |
| 1,04 | ZNF780A                         | zinc finger protein 780A                                                                                |
| 1,04 | ANK2                            | ankyrin 2, neuronal                                                                                     |
| 1,04 | ARHGAP12                        | Rho GTPase activating protein 12                                                                        |
| 1,04 | KPNA5                           | karyopherin alpha 5 (importin alpha 6)                                                                  |
| 1,04 | BAAT                            | bile acid-CoA:amino acid N-acyltransferase                                                              |
| 1,04 | FAM177B                         | family with sequence similarity 177, member B                                                           |
| 1,04 | ZNF775                          | zinc finger protein 775                                                                                 |
| 1,04 | APOBEC2                         | apolipoprotein B mRNA editing enzyme, catalytic polypeptide-like 2                                      |
| 1,04 | TMEM86A                         | transmembrane protein 86A                                                                               |
| 1,04 | TMEM161B                        | transmembrane protein 161B                                                                              |
| 1,04 | CPNE9                           | copine family member IX                                                                                 |
| 1,04 | SETD9                           | SET domain containing 9                                                                                 |
| 1,04 | MED25;<br>MIR6800               | mediator complex subunit 25; microRNA 6800                                                              |
| 1,04 | CLCA2                           | chloride channel accessory 2                                                                            |

|      |                    |                                                                                       |
|------|--------------------|---------------------------------------------------------------------------------------|
| 1,04 | ALX4               | ALX homeobox 4                                                                        |
| 1,04 | SENP6              | SUMO1/sentrin specific peptidase 6                                                    |
| 1,04 | HSD3B1             | hydroxy-delta-5-steroid dehydrogenase, 3 beta- and steroid delta-isomerase 1          |
| 1,04 | OPRM1              | opioid receptor, mu 1                                                                 |
| 1,04 | PPARA              | peroxisome proliferator-activated receptor alpha                                      |
| 1,04 | DUX4L7             | double homeobox 4 like 7                                                              |
| 1,04 | MEPE               | matrix extracellular phosphoglycoprotein                                              |
| 1,04 | SHPK; TRPV1        | sedoheptulokinase; transient receptor potential cation channel, subfamily V, member 1 |
| 1,04 | ZFP36L2            | ZFP36 ring finger protein-like 2                                                      |
| 1,04 | FILIP1             | filamin A interacting protein 1                                                       |
| 1,04 | APC2               | adenomatosis polyposis coli 2                                                         |
| 1,04 | AGR3               | anterior gradient 3, protein disulphide isomerase family member                       |
| 1,04 | BCAS1              | breast carcinoma amplified sequence 1                                                 |
| 1,04 | REEP4              | receptor accessory protein 4                                                          |
| 1,04 | CTPS1              | CTP synthase 1                                                                        |
| 1,04 | AK3                | adenylate kinase 3                                                                    |
| 1,04 | LCT                | lactase                                                                               |
| 1,04 | DTD1               | D-tyrosyl-tRNA deacylase 1                                                            |
| 1,04 | F11R               | F11 receptor                                                                          |
| 1,04 | SRPX2              | sushi-repeat containing protein, X-linked 2                                           |
| 1,04 | GPATCH4            | G-patch domain containing 4                                                           |
| 1,04 | ACBD3              | acyl-CoA binding domain containing 3                                                  |
| 1,04 | CSF3               | colony stimulating factor 3                                                           |
| 1,04 | STAC3              | SH3 and cysteine rich domain 3                                                        |
| 1,04 | MAPRE2             | microtubule-associated protein, RP/EB family, member 2                                |
| 1,04 | MRPL22             | mitochondrial ribosomal protein L22                                                   |
| 1,04 | PROZ               | protein Z, vitamin K-dependent plasma glycoprotein                                    |
| 1,04 | ASB15              | ankyrin repeat and SOCS box containing 15                                             |
| 1,04 | CCDC124            | coiled-coil domain containing 124                                                     |
| 1,04 | FPGT-TNNI3K; FPGT  | FPGT-TNNI3K readthrough; fucose-1-phosphate guanylyltransferase                       |
| 1,04 | RBM5               | RNA binding motif protein 5                                                           |
| 1,04 | SPPL2C             | signal peptide peptidase like 2C                                                      |
| 1,04 | CLSTN3             | calsyntenin 3                                                                         |
| 1,04 | ARSF               | arylsulfatase F                                                                       |
| 1,04 | C16orf92           | chromosome 16 open reading frame 92                                                   |
| 1,04 | KIAA1024L          | KIAA1024-like                                                                         |
| 1,04 | LINC00471          | long intergenic non-protein coding RNA 471                                            |
| 1,04 | ATOH7              | atonal bHLH transcription factor 7                                                    |
| 1,04 | DENND1C            | DENN/MADD domain containing 1C                                                        |
| 1,04 | PCDH18             | protocadherin 18                                                                      |
| 1,04 | LINC01296; DUXAP10 | long intergenic non-protein coding RNA 1296; double homeobox A pseudogene 10          |
| 1,04 | MRPS27             | mitochondrial ribosomal protein S27                                                   |
| 1,04 | SLC18A3            | solute carrier family 18 (vesicular acetylcholine transporter), member 3              |

|      |          |                                                                  |
|------|----------|------------------------------------------------------------------|
| 1,04 | POGZ     | Transcript Identified by AceView, Entrez Gene ID(s)<br>23126     |
| 1,04 | TMEM117  | transmembrane protein 117                                        |
| 1,04 | PCGF5    | polycomb group ring finger 5                                     |
| 1,04 | EVL      | Enah/Vasp-like                                                   |
| 1,04 | CYB5R1   | cytochrome b5 reductase 1                                        |
| 1,04 | PHAX     | phosphorylated adaptor for RNA export                            |
| 1,04 | NPFFR2   | neuropeptide FF receptor 2                                       |
| 1,04 | RARB     | retinoic acid receptor, beta                                     |
| 1,04 | FGA      | fibrinogen alpha chain                                           |
| 1,04 | HPDL     | 4-hydroxyphenylpyruvate dioxygenase-like                         |
| 1,04 | UMOD     | uromodulin                                                       |
| 1,04 | OR52W1   | olfactory receptor, family 52, subfamily W, member 1             |
| 1,04 | FAM9C    | family with sequence similarity 9, member C                      |
| 1,04 | FOSL2    | FOS-like antigen 2                                               |
| 1,04 | POLRMT   | polymerase (RNA) mitochondrial (DNA directed)                    |
| 1,04 | ITIH1    | inter-alpha-trypsin inhibitor heavy chain 1                      |
| 1,04 | PRAMEF10 | PRAME family member 10                                           |
| 1,04 | RPS16    | ribosomal protein S16                                            |
| 1,04 | ZNF513   | zinc finger protein 513                                          |
| 1,04 | CGNL1    | cingulin-like 1                                                  |
| 1,04 | EMP3     | epithelial membrane protein 3                                    |
| 1,04 | DFFA     | DNA fragmentation factor, 45kDa, alpha polypeptide               |
| 1,04 | C1orf50  | chromosome 1 open reading frame 50                               |
| 1,04 | RPS4X    | ribosomal protein S4, X-linked                                   |
| 1,04 | RPE      | ribulose-5-phosphate-3-epimerase                                 |
| 1,04 | ZDHHC24  | zinc finger, DHHC-type containing 24                             |
| 1,04 | PIK3AP1  | phosphoinositide-3-kinase adaptor protein 1                      |
| 1,04 | ZAP70    | zeta chain of T cell receptor associated protein kinase<br>70kDa |
| 1,04 | PRCC     | papillary renal cell carcinoma (translocation-<br>associated)    |
| 1,04 | ZNF806   | zinc finger protein 806                                          |
| 1,04 | CCIN     | calicin                                                          |
| 1,04 | ZAR1L    | zygote arrest 1-like                                             |
| 1,04 | ZFAND5   | zinc finger, AN1-type domain 5                                   |
| 1,04 | ESPNL    | espin-like                                                       |
| 1,04 | UBAP2L   | ubiquitin associated protein 2 like                              |
| 1,04 | PSPN     | persephin                                                        |
| 1,04 | PCSK7    | proprotein convertase subtilisin/kexin type 7                    |
| 1,04 | ACVR2A   | activin A receptor type IIA                                      |
| 1,04 | IQSEC2   | IQ motif and Sec7 domain 2                                       |
| 1,04 | PIWIL1   | piwi-like RNA-mediated gene silencing 1                          |
| 1,04 | AASDH    | aminoadipate-semialdehyde dehydrogenase                          |
| 1,04 | CPN1     | carboxypeptidase N, polypeptide 1                                |
| 1,04 | SDHAF1   | succinate dehydrogenase complex assembly factor 1                |
| 1,04 | NDNL2    | necdin-like 2, SMC5-SMC6 complex component                       |
| 1,04 | VPS37A   | vacuolar protein sorting 37 homolog A (S. cerevisiae)            |
| 1,04 | DRC1     | dynein regulatory complex subunit 1                              |
| 1,04 | PFN1     | profilin 1                                                       |

|      |                  |                                                                    |
|------|------------------|--------------------------------------------------------------------|
| 1,04 | C21orf140        | chromosome 21 open reading frame 140                               |
| 1,04 | C21orf140        | chromosome 21 open reading frame 140                               |
| 1,04 | RPL36A-HNRNPH2   | RPL36A-HNRNPH2 readthrough                                         |
| 1,04 | ABCB8            | ATP binding cassette subfamily B member 8                          |
| 1,04 | SYT4             | synaptotagmin IV                                                   |
| 1,04 | ENPP3            | ectonucleotide pyrophosphatase/phosphodiesterase 3                 |
| 1,04 | SPANXN1          | SPANX family, member N1                                            |
| 1,04 | MVP; PAGR1       | major vault protein; PAXIP1 associated glutamate-rich protein 1    |
| 1,04 | GJA1             | gap junction protein alpha 1                                       |
| 1,04 | HIP1R            | huntingtin interacting protein 1 related                           |
| 1,04 | HORMAD1          | HORMA domain containing 1                                          |
| 1,04 | GEMIN5           | gem nuclear organelle associated protein 5                         |
| 1,04 | CCDC115          | coiled-coil domain containing 115                                  |
| 1,04 | ATRIP; TREX1     | ATR interacting protein; three prime repair exonuclease 1          |
| 1,04 | AP2A2            | adaptor-related protein complex 2, alpha 2 subunit                 |
| 1,04 | TRAPPC4          | trafficking protein particle complex 4                             |
| 1,04 | CATSPER1         | cation channel, sperm associated 1                                 |
| 1,04 | ECI1             | enoyl-CoA delta isomerase 1                                        |
| 1,04 | FAM182B          | family with sequence similarity 182, member B                      |
| 1,04 | RRP36            | ribosomal RNA processing 36                                        |
| 1,04 | FAM157B          | family with sequence similarity 157, member B                      |
| 1,04 | SIRT4            | sirtuin 4                                                          |
| 1,04 | KIAA0319L        | KIAA0319-like                                                      |
| 1,04 | RAET1L           | retinoic acid early transcript 1L                                  |
| 1,04 | M1AP             | meiosis 1 associated protein                                       |
| 1,04 | ZFPM2            | zinc finger protein, FOG family member 2                           |
| 1,04 | SLC38A1          | solute carrier family 38, member 1                                 |
| 1,04 | BCAR3            | breast cancer anti-estrogen resistance 3                           |
| 1,04 | RAB21            | RAB21, member RAS oncogene family                                  |
| 1,04 | DNAAF2           | dynein, axonemal, assembly factor 2                                |
| 1,04 | CR1L             | complement component (3b/4b) receptor 1-like                       |
| 1,04 | STX11            | syntaxin 11                                                        |
| 1,04 | SCP2             | sterol carrier protein 2                                           |
| 1,04 | SUPT4H1          | SPT4 homolog, DSIF elongation factor subunit                       |
| 1,04 | DCLRE1A          | DNA cross-link repair 1A                                           |
| 1,04 | RPL18            | ribosomal protein L18                                              |
| 1,04 | MTAP             | methylthioadenosine phosphorylase                                  |
| 1,04 | PPP2CA           | protein phosphatase 2, catalytic subunit, alpha isozyme            |
| 1,04 | EME1             | essential meiotic structure-specific endonuclease 1                |
| 1,04 | FAAH             | fatty acid amide hydrolase                                         |
| 1,04 | ARFGAP1; MIR4326 | ADP-ribosylation factor GTPase activating protein 1; microRNA 4326 |
| 1,04 | ARPP21           | cAMP-regulated phosphoprotein 21kDa                                |
| 1,04 | SCLY             | selenocysteine lyase                                               |
| 1,04 | CEP83            | centrosomal protein 83kDa                                          |
| 1,04 | RPL4             | ribosomal protein L4                                               |

|      |                                          |                                                                                                         |
|------|------------------------------------------|---------------------------------------------------------------------------------------------------------|
| 1,04 | KAT2A                                    | K(lysine) acetyltransferase 2A                                                                          |
| 1,04 | LRRC34                                   | leucine rich repeat containing 34                                                                       |
| 1,04 | PTGR1                                    | prostaglandin reductase 1                                                                               |
| 1,04 | PNCK                                     | pregnancy up-regulated nonubiquitous CaM kinase                                                         |
| 1,04 | MAP1LC3B2                                | microtubule-associated protein 1 light chain 3 beta 2                                                   |
| 1,04 | PAEP                                     | progestagen-associated endometrial protein                                                              |
| 1,04 | PEAR1                                    | platelet endothelial aggregation receptor 1                                                             |
| 1,04 | MYO18B                                   | myosin XVIIIIB                                                                                          |
| 1,04 | FGF17                                    | fibroblast growth factor 17                                                                             |
| 1,04 | MAGEA5                                   | MAGE family member A5                                                                                   |
| 1,04 | POLDIP3                                  | polymerase (DNA-directed), delta interacting protein 3                                                  |
| 1,04 | NDFIP1                                   | Nedd4 family interacting protein 1                                                                      |
| 1,04 | PTPRK                                    | protein tyrosine phosphatase, receptor type, K                                                          |
| 1,04 | PROSER2                                  | proline and serine rich 2                                                                               |
| 1,04 | TSPY8                                    | testis specific protein, Y-linked 8                                                                     |
| 1,04 | CDC42SE1                                 | CDC42 small effector 1                                                                                  |
| 1,04 | LOC399886;<br>RP11-430H10.2;<br>FLJ41423 | uncharacterized LOC399886; Transcript Identified by AceView, Entrez Gene ID(s) 399886; novel transcript |
| 1,04 | NPY2R                                    | neuropeptide Y receptor Y2                                                                              |
| 1,04 | MGAT3                                    | mannosyl (beta-1,4-)-glycoprotein beta-1,4-N-acetylglucosaminyltransferase                              |
| 1,04 | NUDT4                                    | nudix hydrolase 4                                                                                       |
| 1,04 | PVRL4                                    | poliovirus receptor-related 4                                                                           |
| 1,04 | BIRC6                                    | Transcript Identified by AceView, Entrez Gene ID(s) 57448                                               |
| 1,04 | ALDH6A1                                  | aldehyde dehydrogenase 6 family, member A1                                                              |
| 1,04 | EIF2S2                                   | Zhang2013 ALT_ACCEPTOR, ALT_DONOR, coding, INTERNAL, intronic best transcript NM_003908                 |
| 1,04 | TMEM55B                                  | transmembrane protein 55B                                                                               |
| 1,04 | RPL12                                    | Zhang2013 ALT_ACCEPTOR, ALT_DONOR, coding, INTERNAL, intronic best transcript NM_000976                 |
| 1,04 | PSMD4                                    | proteasome 26S subunit, non-ATPase 4                                                                    |
| 1,04 | PTRH1                                    | peptidyl-tRNA hydrolase 1 homolog                                                                       |
| 1,04 | HECTD3                                   | HECT domain containing E3 ubiquitin protein ligase 3                                                    |
| 1,04 | MAP7D1                                   | MAP7 domain containing 1                                                                                |
| 1,04 | LINC01343                                | long intergenic non-protein coding RNA 1343                                                             |
| 1,04 | PIGH                                     | phosphatidylinositol glycan anchor biosynthesis class H                                                 |
| 1,04 | LRG1                                     | leucine-rich alpha-2-glycoprotein 1                                                                     |
| 1,04 | DDHD2                                    | DDHD domain containing 2                                                                                |
| 1,04 | COMMD2                                   | COMM domain containing 2                                                                                |
| 1,04 | RAB27B                                   | RAB27B, member RAS oncogene family                                                                      |
| 1,04 | CHCHD4                                   | coiled-coil-helix-coiled-coil-helix domain containing 4                                                 |
| 1,04 | PIAS4                                    | protein inhibitor of activated STAT 4                                                                   |

|      |                               |                                                                                    |
|------|-------------------------------|------------------------------------------------------------------------------------|
| 1,04 | STX4                          | syntaxin 4                                                                         |
| 1,04 | RILPL1                        | Rab interacting lysosomal protein-like 1                                           |
| 1,04 | DCTN5                         | dynactin 5 (p25)                                                                   |
| 1,04 | RAB40AL                       | RAB40A, member RAS oncogene family-like                                            |
| 1,04 | TXNRD2                        | thioredoxin reductase 2                                                            |
| 1,04 | DPP10                         | dipeptidyl-peptidase 10 (inactive)                                                 |
| 1,04 | ZKSCAN2                       | zinc finger with KRAB and SCAN domains 2                                           |
| 1,04 | IBTK                          | inhibitor of Bruton agammaglobulinemia tyrosine kinase                             |
| 1,04 | PSMG4                         | Transcript Identified by AceView, Entrez Gene ID(s) 389362                         |
| 1,04 | RGPD6; RGPD5                  | RANBP2-like and GRIP domain containing 6; RANBP2-like and GRIP domain containing 5 |
| 1,04 | CIC                           | capicua transcriptional repressor                                                  |
| 1,04 | LRRC75B                       | leucine rich repeat containing 75B                                                 |
| 1,04 | ZNF197                        | zinc finger protein 197                                                            |
| 1,04 | CCNT1                         | cyclin T1                                                                          |
| 1,04 | R3HDML                        | R3H domain containing-like                                                         |
| 1,04 | PRAMEF8                       | PRAME family member 8                                                              |
| 1,04 | GNL1                          | guanine nucleotide binding protein-like 1                                          |
| 1,04 | HBA2                          | hemoglobin, alpha 2                                                                |
| 1,04 | CCDC47                        | coiled-coil domain containing 47                                                   |
| 1,04 | NDUFB7                        | NADH dehydrogenase (ubiquinone) 1 beta subcomplex, 7, 18kDa                        |
| 1,04 | KCNS1                         | potassium voltage-gated channel, modifier subfamily S, member 1                    |
| 1,04 | ZNF429                        | zinc finger protein 429                                                            |
| 1,04 | ECT2L                         | epithelial cell transforming 2 like                                                |
| 1,04 | CTSA                          | cathepsin A                                                                        |
| 1,04 | OR8D4                         | olfactory receptor, family 8, subfamily D, member 4                                |
| 1,04 | BTD                           | biotinidase                                                                        |
| 1,04 | AUH                           | AU RNA binding protein/enoyl-CoA hydratase                                         |
| 1,04 | CLCNKB                        | chloride channel, voltage-sensitive Kb                                             |
| 1,04 | DAZAP2                        | DAZ associated protein 2                                                           |
| 1,04 | ABCC4                         | ATP binding cassette subfamily C member 4                                          |
| 1,04 | WNK3                          | WNK lysine deficient protein kinase 3                                              |
| 1,04 | CRYM                          | crystallin mu                                                                      |
| 1,04 | FAM120C                       | family with sequence similarity 120C                                               |
| 1,04 | MRPL11                        | mitochondrial ribosomal protein L11                                                |
| 1,04 | DISC1                         | disrupted in schizophrenia 1                                                       |
| 1,04 | ZNF559-ZNF177; ZNF177; ZNF559 | ZNF559-ZNF177 readthrough; zinc finger protein 177; zinc finger protein 559        |
| 1,04 | ADAMTSL4                      | ADAMTS like 4                                                                      |
| 1,04 | CCDC163P                      | coiled-coil domain containing 163, pseudogene                                      |
| 1,04 | RAB39B                        | RAB39B, member RAS oncogene family                                                 |
| 1,04 | CBWD5                         | COBW domain containing 5                                                           |
| 1,04 | ARL2-SNX15                    | ARL2-SNX15 readthrough (NMD candidate)                                             |
| 1,04 | BTN3A1                        | butyrophilin, subfamily 3, member A1                                               |
| 1,04 | MCCC2                         | methylcrotonoyl-CoA carboxylase 2                                                  |
| 1,04 | FOCAD                         | focadhesin                                                                         |

|      |                            |                                                                                                                                                                                      |
|------|----------------------------|--------------------------------------------------------------------------------------------------------------------------------------------------------------------------------------|
| 1,04 | OR8H1                      | olfactory receptor, family 8, subfamily H, member 1                                                                                                                                  |
| 1,04 | NEURL3                     | neuralized E3 ubiquitin protein ligase 3                                                                                                                                             |
| 1,04 | UNCX                       | UNC homeobox                                                                                                                                                                         |
| 1,04 | TMEM233                    | transmembrane protein 233                                                                                                                                                            |
| 1,04 | DDTL; DDT                  | D-dopachrome tautomerase-like; D-dopachrome tautomerase                                                                                                                              |
| 1,04 | PRR23A                     | proline rich 23A                                                                                                                                                                     |
| 1,04 | HDGF                       | hepatoma-derived growth factor                                                                                                                                                       |
| 1,04 | TEX43                      | testis expressed 43                                                                                                                                                                  |
| 1,04 | RNF219                     | ring finger protein 219                                                                                                                                                              |
| 1,04 | PLA2G10                    | phospholipase A2, group X                                                                                                                                                            |
| 1,04 | YAF2                       | YY1 associated factor 2                                                                                                                                                              |
| 1,04 | MED16                      | mediator complex subunit 16                                                                                                                                                          |
| 1,04 | CLDN3                      | claudin 3                                                                                                                                                                            |
| 1,04 | HOMER1                     | homer scaffolding protein 1                                                                                                                                                          |
| 1,04 | GNB3                       | guanine nucleotide binding protein (G protein), beta polypeptide 3                                                                                                                   |
| 1,04 | TMEM100                    | transmembrane protein 100                                                                                                                                                            |
| 1,04 | ALG1L9P                    | asparagine-linked glycosylation 1-like 9, pseudogene                                                                                                                                 |
| 1,04 | MARCH5                     | membrane associated ring finger 5                                                                                                                                                    |
| 1,04 | CYP4F22                    | cytochrome P450, family 4, subfamily F, polypeptide 22                                                                                                                               |
| 1,04 | ANKRD49                    | ankyrin repeat domain 49                                                                                                                                                             |
| 1,04 | URGCP; URGCP-MRPS24        | upregulator of cell proliferation; URGCP-MRPS24 readthrough                                                                                                                          |
| 1,04 | NABP1                      | nucleic acid binding protein 1                                                                                                                                                       |
| 1,04 | AMY1C; AMY1A               | amylase, alpha 1C (salivary); amylase, alpha 1A (salivary)                                                                                                                           |
| 1,04 | TNNT2                      | troponin T type 2 (cardiac)                                                                                                                                                          |
| 1,04 | ETV6                       | ets variant 6                                                                                                                                                                        |
| 1,04 | CORO1C                     | coronin, actin binding protein, 1C                                                                                                                                                   |
| 1,04 | TRABD                      | TraB domain containing                                                                                                                                                               |
| 1,04 | NUP43                      | nucleoporin 43kDa                                                                                                                                                                    |
| 1,04 | RBM1Y1F; RBMY2FP; RBMY1J   | RNA binding motif protein, Y-linked, family 1, member F; RNA binding motif protein, Y-linked, family 2, member F pseudogene; RNA binding motif protein, Y-linked, family 1, member J |
| 1,04 | SAP130                     | Sin3A associated protein 130kDa                                                                                                                                                      |
| 1,04 | HCFC1R1                    | host cell factor C1 regulator 1 (XPO1 dependent)                                                                                                                                     |
| 1,04 | PKNOX2                     | PBX/knotted 1 homeobox 2                                                                                                                                                             |
| 1,04 | GNAI3                      | guanine nucleotide binding protein (G protein), alpha inhibiting activity polypeptide 3                                                                                              |
| 1,04 | LEMD1                      | LEM domain containing 1                                                                                                                                                              |
| 1,04 | LOC100129697; RP11-830F9.6 | uncharacterized LOC100129697; novel transcript, antisense to CBFA2T3                                                                                                                 |
| 1,04 | OR10AD1                    | olfactory receptor, family 10, subfamily AD, member 1                                                                                                                                |
| 1,04 | PROB1                      | proline-rich basic protein 1                                                                                                                                                         |
| 1,04 | TDRP                       | testis development related protein                                                                                                                                                   |
| 1,04 | ZNF326                     | zinc finger protein 326                                                                                                                                                              |

|      |                   |                                                                                          |
|------|-------------------|------------------------------------------------------------------------------------------|
| 1,04 | SFXN1             | sideroflexin 1                                                                           |
| 1,04 | AVPR1B            | arginine vasopressin receptor 1B                                                         |
| 1,04 | ZMAT5             | zinc finger, matrin-type 5                                                               |
| 1,04 | STX2              | syntaxin 2                                                                               |
| 1,04 | GINS3             | GINS complex subunit 3 (Psf3 homolog)                                                    |
| 1,04 | CYP26A1           | cytochrome P450, family 26, subfamily A, polypeptide 1                                   |
| 1,04 | TMEM248           | transmembrane protein 248                                                                |
| 1,04 | IFNLR1            | interferon, lambda receptor 1                                                            |
| 1,04 | NEFH              | neurofilament, heavy polypeptide                                                         |
| 1,04 | SPG21             | spastic paraplegia 21 (autosomal recessive, Mast syndrome)                               |
| 1,04 | ADAM18            | ADAM metallopeptidase domain 18                                                          |
| 1,04 | GOT2              | glutamic-oxaloacetic transaminase 2, mitochondrial                                       |
| 1,04 | ZNF788            | zinc finger family member 788                                                            |
| 1,04 | ASPRV1; PCBP1-AS1 | aspartic peptidase, retroviral-like 1; PCBP1 antisense RNA 1                             |
| 1,04 | DAG1              | dystroglycan 1 (dystrophin-associated glycoprotein 1)                                    |
| 1,04 | BFAR              | bifunctional apoptosis regulator                                                         |
| 1,04 | DUSP16            | dual specificity phosphatase 16                                                          |
| 1,04 | FOLH1             | folate hydrolase (prostate-specific membrane antigen) 1                                  |
| 1,04 | ST20              | suppressor of tumorigenicity 20                                                          |
| 1,04 | INTS6             | integrator complex subunit 6                                                             |
| 1,04 | CLPP              | caseinolytic mitochondrial matrix peptidase proteolytic subunit                          |
| 1,04 | GNGT2             | guanine nucleotide binding protein (G protein), gamma transducing activity polypeptide 2 |
| 1,04 | FBXL3             | F-box and leucine-rich repeat protein 3                                                  |
| 1,04 | BTNL2             | butyrophilin-like 2                                                                      |
| 1,04 | BCAT2             | branched chain amino-acid transaminase 2, mitochondrial                                  |
| 1,04 | RASD1             | RAS, dexamethasone-induced 1                                                             |
| 1,04 | SCAPER            | Transcript Identified by AceView, Entrez Gene ID(s) 49855                                |
| 1,04 | LRSAM1            | leucine rich repeat and sterile alpha motif containing 1                                 |
| 1,04 | DYNC2LI1          | dynein, cytoplasmic 2, light intermediate chain 1                                        |
| 1,04 | HHIP              | hedgehog interacting protein                                                             |
| 1,04 | TAF6              | TAF6 RNA polymerase II, TATA box binding protein (TBP)-associated factor, 80kDa          |
| 1,04 | MICU1             | mitochondrial calcium uptake 1                                                           |
| 1,04 | STKLD1            | serine/threonine kinase-like domain containing 1                                         |
| 1,04 | RAD54B            | Transcript Identified by AceView, Entrez Gene ID(s) 25788                                |
| 1,04 | WDR12             | WD repeat domain 12                                                                      |
| 1,04 | CWC27             | CWC27 spliceosome-associated protein homolog                                             |
| 1,04 | NKX2-3            | NK2 homeobox 3                                                                           |
| 1,04 | COX8C             | cytochrome c oxidase subunit VIIIc                                                       |
| 1,04 | SCN4B             | sodium channel, voltage gated, type IV beta subunit                                      |

|      |           |                                                                                         |
|------|-----------|-----------------------------------------------------------------------------------------|
| 1,04 | THG1L     | tRNA-histidine guanylyltransferase 1-like                                               |
| 1,04 | MTDH      | metadherin                                                                              |
| 1,04 | FOXK1     | Transcript Identified by AceView, Entrez Gene ID(s)<br>221937                           |
| 1,04 | MAFA      | v-maf avian musculoaponeurotic fibrosarcoma<br>oncogene homolog A                       |
| 1,04 | CMTM1     | CKLF-like MARVEL transmembrane domain<br>containing 1                                   |
| 1,04 | INPP5D    | inositol polyphosphate-5-phosphatase D                                                  |
| 1,04 | CYHR1     | cysteine/histidine-rich 1                                                               |
| 1,04 | sep-06    | septin 6                                                                                |
| 1,04 | PPIF      | peptidylprolyl isomerase F                                                              |
| 1,04 | TMEM78    | transmembrane protein 78                                                                |
| 1,04 | HN1L      | hematological and neurological expressed 1-like                                         |
| 1,04 | FOXJ3     | forkhead box J3                                                                         |
| 1,04 | MCM9      | minichromosome maintenance 9 homologous<br>recombination repair factor                  |
| 1,04 | ABHD8     | abhydrolase domain containing 8                                                         |
| 1,04 | MSH6      | mutS homolog 6                                                                          |
| 1,04 | HNRNPH1   | heterogeneous nuclear ribonucleoprotein H1 (H)                                          |
| 1,04 | PSG5      | pregnancy specific beta-1-glycoprotein 5                                                |
| 1,04 | ABCA13    | ATP binding cassette subfamily A member 13                                              |
| 1,04 | VNN3      | vanin 3                                                                                 |
| 1,04 | VPS50     | VPS50 EARP/GARPII complex subunit                                                       |
| 1,04 | RPS15     | ribosomal protein S15                                                                   |
| 1,04 | C16orf71  | chromosome 16 open reading frame 71                                                     |
| 1,04 | SLC31A1   | solute carrier family 31 (copper transporter), member 1                                 |
| 1,04 | ILKAP     | ILK associated serine/threonine phosphatase                                             |
| 1,04 | CCDC84    | coiled-coil domain containing 84                                                        |
| 1,04 | OXNAD1    | oxidoreductase NAD-binding domain containing 1                                          |
| 1,04 | SOCS4     | suppressor of cytokine signaling 4                                                      |
| 1,04 | ZNF781    | zinc finger protein 781                                                                 |
| 1,04 | GPC3      | glypican 3                                                                              |
| 1,04 | SART1     | squamous cell carcinoma antigen recognized by T-cells<br>1                              |
| 1,04 | PLD2      | phospholipase D2                                                                        |
| 1,04 | GDAP2     | ganglioside induced differentiation associated protein 2                                |
| 1,04 | ACRC      | acidic repeat containing                                                                |
| 1,04 | CAB39     | calcium binding protein 39                                                              |
| 1,04 | ZNF430    | zinc finger protein 430                                                                 |
| 1,04 | STAU2     | staufen double-stranded RNA binding protein 2                                           |
| 1,04 | MAT2B     | methionine adenosyltransferase II, beta                                                 |
| 1,04 | SERPINA12 | serpin peptidase inhibitor, clade A (alpha-1<br>antiproteinase, antitrypsin), member 12 |
| 1,04 | ZNF536    | zinc finger protein 536                                                                 |
| 1,04 | RASSF4    | Ras association (RalGDS/AF-6) domain family<br>member 4                                 |

|      |                   |                                                                                   |
|------|-------------------|-----------------------------------------------------------------------------------|
| 1,04 | GABRA6            | gamma-aminobutyric acid (GABA) A receptor, alpha 6                                |
| 1,04 | ACTG2             | actin, gamma 2, smooth muscle, enteric                                            |
| 1,04 | LNPEP             | leucyl/cystinyl aminopeptidase                                                    |
| 1,04 | SURF1             | surfeit 1                                                                         |
| 1,04 | CST7              | cystatin F (leukocystatin)                                                        |
| 1,04 | NBPF12            | neuroblastoma breakpoint family, member 12                                        |
| 1,04 | IRGQ              | immunity-related GTPase family, Q                                                 |
| 1,04 | RANBP17           | RAN binding protein 17                                                            |
| 1,04 | KRTAP22-1         | keratin associated protein 22-1                                                   |
| 1,04 | MXD1              | Memczak2013 ANTISENSE, coding, INTERNAL,<br>intronic best transcript NM_001202514 |
| 1,04 | C2orf83           | chromosome 2 open reading frame 83                                                |
| 1,04 | UQCC3             | ubiquinol-cytochrome c reductase complex assembly<br>factor 3                     |
| 1,04 | HEATR4            | HEAT repeat containing 4                                                          |
| 1,04 | FRMD5             | FERM domain containing 5                                                          |
| 1,04 | PEX19             | peroxisomal biogenesis factor 19                                                  |
| 1,04 | TNK1              | tyrosine kinase, non-receptor, 1                                                  |
| 1,04 | CYP7A1            | cytochrome P450, family 7, subfamily A, polypeptide 1                             |
| 1,04 | KRTAP1-1          | keratin associated protein 1-1                                                    |
| 1,04 | TRIL              | TLR4 interactor with leucine-rich repeats                                         |
| 1,04 | CSNK1A1L          | casein kinase 1, alpha 1-like                                                     |
| 1,04 | SLC25A13          | solute carrier family 25 (aspartate/glutamate carrier),<br>member 13              |
| 1,04 | DMRTA2            | DMRT-like family A2                                                               |
| 1,04 | POU4F3            | POU class 4 homeobox 3                                                            |
| 1,04 | ATXN7L3B          | ataxin 7-like 3B                                                                  |
| 1,04 | TCF7L2            | transcription factor 7-like 2 (T-cell specific, HMG-box)                          |
| 1,04 | KAT2A             | Memczak2013 ALT_DONOR, coding, INTERNAL,<br>intronic best transcript NM_021078    |
| 1,04 | TXNIP             | thioredoxin interacting protein                                                   |
| 1,04 | LYZ               | lysozyme                                                                          |
| 1,04 | RBM15B            | RNA binding motif protein 15B                                                     |
| 1,04 | TRPV3             | transient receptor potential cation channel, subfamily<br>V, member 3             |
| 1,04 | YPEL5             | yippee like 5                                                                     |
| 1,04 | WDR17             | WD repeat domain 17                                                               |
| 1,04 | SPON2             | spondin 2, extracellular matrix protein                                           |
| 1,04 | CLNS1A            | chloride channel, nucleotide-sensitive, 1A                                        |
| 1,04 | CLEC2L            | C-type lectin domain family 2, member L                                           |
| 1,04 | PLAC9             | placenta specific 9                                                               |
| 1,04 | PLPP6             | phospholipid phosphatase 6                                                        |
| 1,04 | VPREB1            | pre-B lymphocyte 1                                                                |
| 1,04 | USP39             | ubiquitin specific peptidase 39                                                   |
| 1,04 | CAND1             | cullin-associated and neddylation-dissociated 1                                   |
| 1,04 | ZNF761;<br>TPM3P9 | zinc finger protein 761; tropomyosin 3 pseudogene 9                               |

|      |                                 |                                                                                                 |
|------|---------------------------------|-------------------------------------------------------------------------------------------------|
| 1,04 | CCDC18                          | coiled-coil domain containing 18                                                                |
| 1,04 | CCR5                            | chemokine (C-C motif) receptor 5 (gene/pseudogene)                                              |
| 1,04 | DPH2                            | DPH2 homolog                                                                                    |
| 1,04 | STRIP2                          | striatin interacting protein 2                                                                  |
| 1,04 | GAGE12H;<br>GAGE12B;<br>GAGE12C | G antigen 12H; G antigen 12B; G antigen 12C                                                     |
| 1,04 | GAGE12D                         | G antigen 12D                                                                                   |
| 1,04 | GAGE12G;<br>GAGE12E             | G antigen 12G; G antigen 12E                                                                    |
| 1,04 | SLC25A44                        | solute carrier family 25, member 44                                                             |
| 1,04 | KCNN2                           | potassium channel, calcium activated intermediate/small conductance subfamily N alpha, member 2 |
| 1,04 | PTMA                            | prothymosin, alpha                                                                              |
| 1,04 | NUP58                           | nucleoporin 58kDa                                                                               |
| 1,04 | ADAT2                           | adenosine deaminase, tRNA-specific 2                                                            |
| 1,04 | DPF2                            | D4, zinc and double PHD fingers family 2                                                        |
| 1,04 | ERICH4                          | glutamate rich 4                                                                                |
| 1,04 | KCNK13                          | potassium channel, two pore domain subfamily K, member 13                                       |
| 1,04 | PEG10                           | paternally expressed 10                                                                         |
| 1,04 | SPATS1                          | spermatogenesis associated, serine-rich 1                                                       |
| 1,04 | CCL1                            | chemokine (C-C motif) ligand 1                                                                  |
| 1,04 | CA2                             | carbonic anhydrase II                                                                           |
| 1,04 | SEC22C                          | SEC22 homolog C, vesicle trafficking protein                                                    |
| 1,04 | DCAF13                          | DDB1 and CUL4 associated factor 13                                                              |
| 1,04 | OR51F1                          | olfactory receptor, family 51, subfamily F, member 1 (gene/pseudogene)                          |
| 1,04 | PDZRN4                          | PDZ domain containing ring finger 4                                                             |
| 1,04 | WBP5                            | WW domain binding protein 5                                                                     |
| 1,04 | ARRDC1                          | arrestin domain containing 1                                                                    |
| 1,04 | RNF112                          | ring finger protein 112                                                                         |
| 1,04 | CARM1                           | coactivator-associated arginine methyltransferase 1                                             |
| 1,04 | ARMCX1                          | armadillo repeat containing, X-linked 1                                                         |
| 1,04 | ANAPC2                          | anaphase promoting complex subunit 2                                                            |
| 1,04 | KCNF1                           | potassium channel, voltage gated modifier subfamily F, member 1                                 |
| 1,04 | ALG1; NAGPA-<br>AS1             | ALG1, chitobiosyldiphosphodolichol beta-mannosyltransferase; NAGPA antisense RNA 1              |
| 1,04 | TTR                             | transthyretin                                                                                   |
| 1,04 | ELK1                            | ELK1, member of ETS oncogene family                                                             |
| 1,04 | NAALADL2                        | N-acetylated alpha-linked acidic dipeptidase-like 2                                             |
| 1,04 | FAF1                            | Fas (TNFRSF6) associated factor 1                                                               |
| 1,04 | NAE1                            | NEDD8 activating enzyme E1 subunit 1                                                            |
| 1,04 | RGS22                           | regulator of G-protein signaling 22                                                             |
| 1,04 | UHRF1BP1L                       | UHRF1 binding protein 1-like                                                                    |
| 1,04 | NHLH2                           | nescient helix-loop-helix 2                                                                     |
| 1,04 | NT5C3A                          | 5-nucleotidase, cytosolic IIIA                                                                  |
| 1,04 | MOB1A                           | MOB kinase activator 1A                                                                         |

|      |           |                                                                                         |
|------|-----------|-----------------------------------------------------------------------------------------|
| 1,04 | ZDHC15    | zinc finger, DHHC-type containing 15                                                    |
| 1,04 | KIF25     | kinesin family member 25                                                                |
| 1,04 | MEIS2     | Meis homeobox 2                                                                         |
| 1,04 | CYBB      | cytochrome b-245, beta polypeptide                                                      |
| 1,04 | TH        | tyrosine hydroxylase                                                                    |
| 1,04 | POLR2L    | polymerase (RNA) II (DNA directed) polypeptide L, 7.6kDa                                |
| 1,04 | PVRL3     | poliovirus receptor-related 3                                                           |
| 1,04 | RBM25     | RNA binding motif protein 25                                                            |
| 1,04 | NSA2      | NSA2 ribosome biogenesis homolog                                                        |
| 1,04 | KALRN     | kalirin, RhoGEF kinase                                                                  |
| 1,04 | FASTKD1   | FAST kinase domains 1                                                                   |
| 1,04 | GPT2      | glutamic pyruvate transaminase (alanine aminotransferase) 2                             |
| 1,04 | FAM91A1   | family with sequence similarity 91, member A1                                           |
| 1,04 | ZNF263    | zinc finger protein 263                                                                 |
| 1,04 | ATP13A3   | Jeck2013 ALT_ACCEPTOR, ALT_DONOR, coding, INTERNAL, intronic best transcript NM_024524  |
| 1,04 | HAGHL     | hydroxyacylglutathione hydrolase-like                                                   |
| 1,04 | PSMG3-AS1 | PSMG3 antisense RNA 1 (head to head)                                                    |
| 1,04 | SLC25A26  | solute carrier family 25 (S-adenosylmethionine carrier), member 26                      |
| 1,04 | CPNE8     | copine VIII                                                                             |
| 1,04 | RPS6KB1   | ribosomal protein S6 kinase, 70kDa, polypeptide 1                                       |
| 1,04 | EOMES     | eomesodermin                                                                            |
| 1,04 | FER1L6    | fer-1-like family member 6                                                              |
| 1,04 | SH2D4A    | Transcript Identified by AceView, Entrez Gene ID(s) 63898                               |
| 1,04 | TBX1      | T-box 1                                                                                 |
| 1,04 | PRPF40B   | PRP40 homolog, pre-mRNA processing factor B                                             |
| 1,04 | ARL10     | ADP-ribosylation factor like GTPase 10                                                  |
| 1,04 | ENGASE    | endo-beta-N-acetylglucosaminidase                                                       |
| 1,04 | RFT1      | RFT1 homolog                                                                            |
| 1,04 | AKT1S1    | Memczak2013 ANTISENSE, coding, INTERNAL, intronic best transcript NM_001098633          |
| 1,04 | SYPL1     | synaptophysin-like 1                                                                    |
| 1,04 | CLP1      | cleavage and polyadenylation factor I subunit 1                                         |
| 1,04 | ZNF566    | zinc finger protein 566                                                                 |
| 1,04 | SGK1      | serum/glucocorticoid regulated kinase 1                                                 |
| 1,04 | OR2J3     | olfactory receptor, family 2, subfamily J, member 3                                     |
| 1,04 | TREH      | trehalase                                                                               |
| 1,04 | UNC80     | unc-80 homolog (C. elegans)                                                             |
| 1,04 | SNX29     | sorting nexin 29                                                                        |
| 1,04 | STAB2     | stabilin 2                                                                              |
| 1,04 | RPS6KA1   | Zhang2013 ALT_ACCEPTOR, ALT_DONOR, coding, INTERNAL, intronic best transcript NM_002953 |
| 1,04 | GLDC      | glycine dehydrogenase (decarboxylating)                                                 |
| 1,04 | AOX1      | aldehyde oxidase 1                                                                      |
| 1,04 | FAM222B   | family with sequence similarity 222, member B                                           |

|      |                      |                                                                                                                                                                                                                                                                                                                                                                                                                                                        |
|------|----------------------|--------------------------------------------------------------------------------------------------------------------------------------------------------------------------------------------------------------------------------------------------------------------------------------------------------------------------------------------------------------------------------------------------------------------------------------------------------|
| 1,04 | KRTAP20-2            | keratin associated protein 20-2                                                                                                                                                                                                                                                                                                                                                                                                                        |
| 1,04 | C7orf43;<br>MIR4658  | chromosome 7 open reading frame 43; microRNA 4658                                                                                                                                                                                                                                                                                                                                                                                                      |
| 1,04 | STIP1                | stress-induced phosphoprotein 1                                                                                                                                                                                                                                                                                                                                                                                                                        |
| 1,04 | MRPS21               | mitochondrial ribosomal protein S21                                                                                                                                                                                                                                                                                                                                                                                                                    |
| 1,04 | SPCS1                | signal peptidase complex subunit 1                                                                                                                                                                                                                                                                                                                                                                                                                     |
| 1,04 | FAM83C               | family with sequence similarity 83, member C                                                                                                                                                                                                                                                                                                                                                                                                           |
| 1,04 | C3orf14              | chromosome 3 open reading frame 14                                                                                                                                                                                                                                                                                                                                                                                                                     |
| 1,04 | ZNF546               | zinc finger protein 546                                                                                                                                                                                                                                                                                                                                                                                                                                |
| 1,04 | LOC155060;<br>ZNF783 | AI894139 pseudogene; Transcript Identified by AceView, Entrez Gene ID(s) 155060                                                                                                                                                                                                                                                                                                                                                                        |
| 1,04 | IL9R                 | interleukin 9 receptor                                                                                                                                                                                                                                                                                                                                                                                                                                 |
| 1,04 | IL9R                 | Homo sapiens interleukin 9 receptor (IL9R), transcript variant 1, mRNA.; Homo sapiens interleukin 9 receptor (IL9R), transcript variant 2, mRNA.; interleukin 9 receptor [Source:HGNC Symbol;Acc:HGNC:6030]; Homo sapiens interleukin 9 receptor, mRNA (cDNA clone MGC:59852 IMAGE:6304829), complete cds.; Transcript Identified by AceView, Entrez Gene ID(s) 3581, RefSeq ID(s) NM_002186; Transcript Identified by AceView, Entrez Gene ID(s) 3581 |
| 1,04 | WDR34                | WD repeat domain 34                                                                                                                                                                                                                                                                                                                                                                                                                                    |
| 1,04 | SPOCK2               | sparc/osteonectin, cwcv and kazal-like domains proteoglycan (testican) 2                                                                                                                                                                                                                                                                                                                                                                               |
| 1,04 | WNT5A                | wingless-type MMTV integration site family, member 5A                                                                                                                                                                                                                                                                                                                                                                                                  |
| 1,04 | CHAT                 | choline O-acetyltransferase                                                                                                                                                                                                                                                                                                                                                                                                                            |
| 1,04 | SLC25A45             | solute carrier family 25, member 45                                                                                                                                                                                                                                                                                                                                                                                                                    |
| 1,04 | TSC1                 | tuberous sclerosis 1                                                                                                                                                                                                                                                                                                                                                                                                                                   |
| 1,04 | OSBPL6               | oxysterol binding protein-like 6                                                                                                                                                                                                                                                                                                                                                                                                                       |
| 1,04 | RPL37                | ribosomal protein L37                                                                                                                                                                                                                                                                                                                                                                                                                                  |
| 1,04 | TBX3                 | T-box 3                                                                                                                                                                                                                                                                                                                                                                                                                                                |
| 1,04 | TPCN1                | two pore segment channel 1                                                                                                                                                                                                                                                                                                                                                                                                                             |
| 1,04 | FNBP1L               | Transcript Identified by AceView, Entrez Gene ID(s) 54874                                                                                                                                                                                                                                                                                                                                                                                              |
| 1,04 | GP6                  | glycoprotein VI (platelet)                                                                                                                                                                                                                                                                                                                                                                                                                             |
| 1,04 | DUSP8                | dual specificity phosphatase 8                                                                                                                                                                                                                                                                                                                                                                                                                         |
| 1,04 | GRM6                 | glutamate receptor, metabotropic 6                                                                                                                                                                                                                                                                                                                                                                                                                     |
| 1,04 | PAICS                | phosphoribosylaminoimidazole carboxylase, phosphoribosylaminoimidazole succinocarboxamide synthetase                                                                                                                                                                                                                                                                                                                                                   |
| 1,04 | SUPT7L               | SPT7-like STAGA complex gamma subunit                                                                                                                                                                                                                                                                                                                                                                                                                  |
| 1,04 | ZFAND4               | zinc finger, AN1-type domain 4                                                                                                                                                                                                                                                                                                                                                                                                                         |
| 1,04 | IDI1                 | isopentenyl-diphosphate delta isomerase 1                                                                                                                                                                                                                                                                                                                                                                                                              |
| 1,04 | S100A14              | S100 calcium binding protein A14                                                                                                                                                                                                                                                                                                                                                                                                                       |
| 1,04 | LONRF3               | LON peptidase N-terminal domain and ring finger 3                                                                                                                                                                                                                                                                                                                                                                                                      |
| 1,04 | ST7L                 | suppression of tumorigenicity 7 like                                                                                                                                                                                                                                                                                                                                                                                                                   |
| 1,04 | SLC5A10              | solute carrier family 5 (sodium/sugar cotransporter), member 10                                                                                                                                                                                                                                                                                                                                                                                        |
| 1,04 | FAM185A              | family with sequence similarity 185, member A                                                                                                                                                                                                                                                                                                                                                                                                          |

|      |                      |                                                                                                                                       |
|------|----------------------|---------------------------------------------------------------------------------------------------------------------------------------|
| 1,04 | ZNF343               | zinc finger protein 343                                                                                                               |
| 1,04 | TM9SF4               | transmembrane 9 superfamily protein member 4                                                                                          |
| 1,04 | HDLBP                | high density lipoprotein binding protein                                                                                              |
| 1,04 | RLN1                 | relaxin 1                                                                                                                             |
| 1,04 | MCAT                 | malonyl-CoA-acyl carrier protein transacylase                                                                                         |
| 1,04 | KIFAP3               | kinesin-associated protein 3                                                                                                          |
| 1,04 | RAB43                | RAB43, member RAS oncogene family                                                                                                     |
| 1,04 | BHLHB9               | basic helix-loop-helix domain containing, class B, 9                                                                                  |
| 1,04 | PIK3IP1              | phosphoinositide-3-kinase interacting protein 1                                                                                       |
| 1,04 | CACFD1               | calcium channel flower domain containing 1                                                                                            |
| 1,04 | CHI3L2               | chitinase 3-like 2                                                                                                                    |
| 1,04 | TNPO1                | transportin 1                                                                                                                         |
| 1,04 | CCDC134              | coiled-coil domain containing 134                                                                                                     |
| 1,04 | CRHBP                | corticotropin releasing hormone binding protein                                                                                       |
| 1,04 | RPP14                | ribonuclease P/MRP 14kDa subunit                                                                                                      |
| 1,04 | TEKT4P2              | tektin 4 pseudogene 2                                                                                                                 |
| 1,04 | LINC01559            | long intergenic non-protein coding RNA 1559                                                                                           |
| 1,04 | FLG                  | filaggrin                                                                                                                             |
| 1,04 | ZNF641               | zinc finger protein 641                                                                                                               |
| 1,04 | MKNK1                | MAP kinase interacting serine/threonine kinase 1                                                                                      |
| 1,04 | TCEAL8               | transcription elongation factor A (SII)-like 8                                                                                        |
| 1,04 | TRMT10C              | tRNA methyltransferase 10C, mitochondrial RNase P subunit                                                                             |
| 1,04 | STARD7               | StAR-related lipid transfer domain containing 7                                                                                       |
| 1,04 | ULK4P1;<br>ULK4P2    | ULK4 pseudogene 1; ULK4 pseudogene 2                                                                                                  |
| 1,04 | WTH3DI;<br>LOC150786 | RAB6C-like; Synthetic construct Homo sapiens clone IMAGE:100016523, MGC:184337 RAB6C-like (LOC150786) mRNA, encodes complete protein. |
| 1,04 | FANCA                | Fanconi anemia complementation group A                                                                                                |
| 1,04 | TGFBR3L              | transforming growth factor beta receptor III like                                                                                     |
| 1,04 | SPP2                 | secreted phosphoprotein 2                                                                                                             |
| 1,04 | EIF4G1               | eukaryotic translation initiation factor 4 gamma, 1                                                                                   |
| 1,04 | APOC1                | apolipoprotein C-I                                                                                                                    |
| 1,04 | POMGNT2              | protein O-linked mannose N-acetylglucosaminyltransferase 2 (beta 1,4-)                                                                |
| 1,04 | DCUN1D2              | DCN1, defective in cullin neddylation 1, domain containing 2                                                                          |
| 1,04 | OR10A2               | olfactory receptor, family 10, subfamily A, member 2                                                                                  |
| 1,04 | THAP10               | THAP domain containing 10                                                                                                             |
| 1,04 | ACOXL                | acyl-CoA oxidase-like                                                                                                                 |
| 1,04 | DNAJC2               | DnaJ (Hsp40) homolog, subfamily C, member 2                                                                                           |
| 1,04 | CD2                  | CD2 molecule                                                                                                                          |
| 1,04 | SPO11                | SPO11 meiotic protein covalently bound to DSB                                                                                         |
| 1,04 | TARS                 | threonyl-tRNA synthetase                                                                                                              |
| 1,04 | TMEM189              | transmembrane protein 189                                                                                                             |
| 1,04 | ACOT7                | acyl-CoA thioesterase 7                                                                                                               |
| 1,04 | MFSD3                | major facilitator superfamily domain containing 3                                                                                     |

|      |               |                                                                                                                                                                                                                                                                                                                                                                                                                                                                                                                                                                                                                                                                                                                                                                                                                                                                                                                                                                                                                                                                                                                                                          |
|------|---------------|----------------------------------------------------------------------------------------------------------------------------------------------------------------------------------------------------------------------------------------------------------------------------------------------------------------------------------------------------------------------------------------------------------------------------------------------------------------------------------------------------------------------------------------------------------------------------------------------------------------------------------------------------------------------------------------------------------------------------------------------------------------------------------------------------------------------------------------------------------------------------------------------------------------------------------------------------------------------------------------------------------------------------------------------------------------------------------------------------------------------------------------------------------|
| 1,04 | XKRY2; XKRY   | Homo sapiens XK, Kell blood group complex subunit-related, Y-linked 2 (XKRY2), mRNA.; Homo sapiens XK, Kell blood group complex subunit-related, Y-linked (XKRY), mRNA.; Homo sapiens XK, Kell blood group complex subunit-related, Y-linked, mRNA (cDNA clone MGC:164514 IMAGE:40146905), complete cds.; Homo sapiens XK, Kell blood group complex subunit-related, Y-linked, mRNA (cDNA clone MGC:164516 IMAGE:40146907), complete cds.; Homo sapiens XK, Kell blood group complex subunit-related, Y-linked 2, mRNA (cDNA clone MGC:164532 IMAGE:40146923), complete cds.; Homo sapiens XK, Kell blood group complex subunit-related, Y-linked 2, mRNA (cDNA clone MGC:164534 IMAGE:40146925), complete cds.; Synthetic construct Homo sapiens clone IMAGE:100015836, MGC:183189 XK, Kell blood group complex subunit-related, Y-linked 2 (XKRY2) mRNA, encodes complete protein.; Synthetic construct Homo sapiens clone IMAGE:100016528, MGC:184271 XK, Kell blood group complex subunit-related, Y-linked (XKRY) mRNA, encodes complete protein.; Transcript Identified by AceView, Entrez Gene ID(s) 353515, RefSeq ID(s) NM_004677, NM_001002906 |
| 1,04 | POGZ          | Transcript Identified by AceView, Entrez Gene ID(s) 23126                                                                                                                                                                                                                                                                                                                                                                                                                                                                                                                                                                                                                                                                                                                                                                                                                                                                                                                                                                                                                                                                                                |
| 1,04 | CCDC28A       | coiled-coil domain containing 28A                                                                                                                                                                                                                                                                                                                                                                                                                                                                                                                                                                                                                                                                                                                                                                                                                                                                                                                                                                                                                                                                                                                        |
| 1,04 | HIST1H1C      | Memczak2013 ANTISENSE, CDS, coding, INTERNAL best transcript NM_005319                                                                                                                                                                                                                                                                                                                                                                                                                                                                                                                                                                                                                                                                                                                                                                                                                                                                                                                                                                                                                                                                                   |
| 1,04 | FBXL22        | F-box and leucine-rich repeat protein 22                                                                                                                                                                                                                                                                                                                                                                                                                                                                                                                                                                                                                                                                                                                                                                                                                                                                                                                                                                                                                                                                                                                 |
| 1,04 | APOLD1; DDX47 | apolipoprotein L domain containing 1; DEAD (Asp-Glu-Ala-Asp) box polypeptide 47                                                                                                                                                                                                                                                                                                                                                                                                                                                                                                                                                                                                                                                                                                                                                                                                                                                                                                                                                                                                                                                                          |
| 1,04 | OR6F1; OR14A2 | olfactory receptor, family 6, subfamily F, member 1; olfactory receptor, family 14, subfamily A, member 2                                                                                                                                                                                                                                                                                                                                                                                                                                                                                                                                                                                                                                                                                                                                                                                                                                                                                                                                                                                                                                                |
| 1,04 | APLP1         | amyloid beta (A4) precursor-like protein 1                                                                                                                                                                                                                                                                                                                                                                                                                                                                                                                                                                                                                                                                                                                                                                                                                                                                                                                                                                                                                                                                                                               |
| 1,04 | WFDC5         | WAP four-disulfide core domain 5                                                                                                                                                                                                                                                                                                                                                                                                                                                                                                                                                                                                                                                                                                                                                                                                                                                                                                                                                                                                                                                                                                                         |
| 1,04 | CCR1          | chemokine (C-C motif) receptor 1                                                                                                                                                                                                                                                                                                                                                                                                                                                                                                                                                                                                                                                                                                                                                                                                                                                                                                                                                                                                                                                                                                                         |
| 1,04 | NPY5R         | neuropeptide Y receptor Y5                                                                                                                                                                                                                                                                                                                                                                                                                                                                                                                                                                                                                                                                                                                                                                                                                                                                                                                                                                                                                                                                                                                               |
| 1,04 | EPC1          | enhancer of polycomb homolog 1 (Drosophila)                                                                                                                                                                                                                                                                                                                                                                                                                                                                                                                                                                                                                                                                                                                                                                                                                                                                                                                                                                                                                                                                                                              |
| 1,04 | GRIP1         | glutamate receptor interacting protein 1                                                                                                                                                                                                                                                                                                                                                                                                                                                                                                                                                                                                                                                                                                                                                                                                                                                                                                                                                                                                                                                                                                                 |
| 1,04 | KALRN         | Transcript Identified by AceView, Entrez Gene ID(s) 8997                                                                                                                                                                                                                                                                                                                                                                                                                                                                                                                                                                                                                                                                                                                                                                                                                                                                                                                                                                                                                                                                                                 |
| 1,04 | GDPD2         | glycerophosphodiester phosphodiesterase domain containing 2                                                                                                                                                                                                                                                                                                                                                                                                                                                                                                                                                                                                                                                                                                                                                                                                                                                                                                                                                                                                                                                                                              |
| 1,04 | TRUB2         | TruB pseudouridine (psi) synthase family member 2                                                                                                                                                                                                                                                                                                                                                                                                                                                                                                                                                                                                                                                                                                                                                                                                                                                                                                                                                                                                                                                                                                        |
| 1,04 | TMEM184B      | transmembrane protein 184B                                                                                                                                                                                                                                                                                                                                                                                                                                                                                                                                                                                                                                                                                                                                                                                                                                                                                                                                                                                                                                                                                                                               |
| 1,04 | CDPF1         | cysteine rich, DPF motif domain containing 1                                                                                                                                                                                                                                                                                                                                                                                                                                                                                                                                                                                                                                                                                                                                                                                                                                                                                                                                                                                                                                                                                                             |
| 1,04 | ABHD14B       | abhydrolase domain containing 14B                                                                                                                                                                                                                                                                                                                                                                                                                                                                                                                                                                                                                                                                                                                                                                                                                                                                                                                                                                                                                                                                                                                        |
| 1,04 | ZBTB5         | zinc finger and BTB domain containing 5                                                                                                                                                                                                                                                                                                                                                                                                                                                                                                                                                                                                                                                                                                                                                                                                                                                                                                                                                                                                                                                                                                                  |
| 1,04 | NAP1L1        | nucleosome assembly protein 1-like 1                                                                                                                                                                                                                                                                                                                                                                                                                                                                                                                                                                                                                                                                                                                                                                                                                                                                                                                                                                                                                                                                                                                     |

|      |             |                                                                                      |
|------|-------------|--------------------------------------------------------------------------------------|
| 1,04 | FN3K        | fructosamine 3 kinase                                                                |
| 1,04 | FEZF2       | FEZ family zinc finger 2                                                             |
| 1,04 | MAPK9       | mitogen-activated protein kinase 9                                                   |
| 1,04 | TFCP2L1     | transcription factor CP2-like 1                                                      |
| 1,04 | ARHGAP9     | Rho GTPase activating protein 9                                                      |
| 1,04 | FITM2       | fat storage-inducing transmembrane protein 2                                         |
| 1,04 | LYPD5       | LY6/PLAUR domain containing 5                                                        |
| 1,04 | DRC7        | dynein regulatory complex subunit 7                                                  |
| 1,04 | ASNSD1      | asparagine synthetase domain containing 1                                            |
| 1,04 | ICT1        | immature colon carcinoma transcript 1                                                |
| 1,04 | CUL4B       | cullin 4B                                                                            |
| 1,04 | IDE         | insulin-degrading enzyme                                                             |
| 1,04 | CACNA1G     | calcium channel, voltage-dependent, T type, alpha 1G subunit                         |
| 1,04 | CAPN10      | calpain 10                                                                           |
| 1,04 | HN1         | hematological and neurological expressed 1                                           |
| 1,04 | NUDT2       | nudix hydrolase 2                                                                    |
| 1,04 | NIPA2       | non imprinted in Prader-Willi/Angelman syndrome 2                                    |
| 1,04 | TMEM120A    | transmembrane protein 120A                                                           |
| 1,04 | CYLC2       | cyclin, basic protein of sperm head cytoskeleton 2                                   |
| 1,04 | MBTPS2; YY2 | membrane bound transcription factor peptidase, site 2; YY2 transcription factor      |
| 1,04 | WNT7B       | wingless-type MMTV integration site family, member 7B                                |
| 1,04 | GTF2H3      | general transcription factor IIH subunit 3                                           |
| 1,04 | ABT1        | activator of basal transcription 1                                                   |
| 1,04 | HIST1H2BG   | histone cluster 1, H2bg                                                              |
| 1,04 | TMEM87A     | transmembrane protein 87A                                                            |
| 1,04 | MRPL21      | mitochondrial ribosomal protein L21                                                  |
| 1,04 | SPRYD3      | SPRY domain containing 3                                                             |
| 1,04 | NFYC        | nuclear transcription factor Y subunit gamma                                         |
| 1,04 | ADAMTS7     | ADAM metallopeptidase with thrombospondin type 1 motif 7                             |
| 1,04 | DDX19A      | DEAD (Asp-Glu-Ala-Asp) box polypeptide 19A                                           |
| 1,04 | NINJ2       | ninjurin 2                                                                           |
| 1,04 | RBFOX3      | RNA binding protein, fox-1 homolog (C. elegans) 3                                    |
| 1,04 | GAS2L2      | growth arrest-specific 2 like 2                                                      |
| 1,04 | PCK1        | phosphoenolpyruvate carboxykinase 1 (soluble)                                        |
| 1,04 | SLC16A9     | solute carrier family 16, member 9                                                   |
| 1,04 | OR2T3       | olfactory receptor, family 2, subfamily T, member 3                                  |
| 1,04 | LHX6        | LIM homeobox 6                                                                       |
| 1,04 | IZUMO3      | IZUMO family member 3                                                                |
| 1,04 | LINGO3      | leucine rich repeat and Ig domain containing 3                                       |
| 1,04 | RAVER2      | ribonucleoprotein, PTB-binding 2                                                     |
| 1,04 | KIDINS220   | kinase D-interacting substrate 220kDa                                                |
| 1,04 | RUNX2       | runt-related transcription factor 2                                                  |
| 1,04 | AOC3        | amine oxidase, copper containing 3                                                   |
| 1,04 | ASMT        | Homo sapiens acetylserotonin O-methyltransferase (ASMT), transcript variant 2, mRNA. |
| 1,04 | ABCF3       | ATP binding cassette subfamily F member 3                                            |

|      |                        |                                                                                            |
|------|------------------------|--------------------------------------------------------------------------------------------|
| 1,04 | GNL3L                  | guanine nucleotide binding protein-like 3 (nucleolar)-like                                 |
| 1,04 | IGSF1                  | immunoglobulin superfamily, member 1                                                       |
| 1,04 | USP6NL                 | USP6 N-terminal like                                                                       |
| 1,04 | UBOX5;<br>FASTKD5      | U-box domain containing 5; FAST kinase domains 5                                           |
| 1,04 | TLE3                   | transducin-like enhancer of split 3                                                        |
| 1,04 | BCL7C                  | B-cell CLL/lymphoma 7C                                                                     |
| 1,04 | OR5A2                  | olfactory receptor, family 5, subfamily A, member 2                                        |
| 1,04 | MYH9                   | Zhang2013 ALT_ACCEPTOR, ALT_DONOR, coding, INTERNAL, intronic best transcript NM_002473    |
| 1,04 | THUMPD1                | THUMP domain containing 1                                                                  |
| 1,04 | KRTAP5-8               | keratin associated protein 5-8                                                             |
| 1,04 | DNAJA2                 | DnaJ (Hsp40) homolog, subfamily A, member 2                                                |
| 1,04 | SLC16A1                | solute carrier family 16 (monocarboxylate transporter), member 1                           |
| 1,04 | H3F3B                  | H3 histone, family 3B (H3.3B)                                                              |
| 1,04 | CD47                   | CD47 molecule                                                                              |
| 1,04 | GPR31                  | G protein-coupled receptor 31                                                              |
| 1,04 | CALR3                  | calreticulin 3                                                                             |
| 1,04 | LNP1                   | leukemia NUP98 fusion partner 1                                                            |
| 1,04 | NIPA1                  | non imprinted in Prader-Willi/Angelman syndrome 1                                          |
| 1,04 | MFSD14C                | major facilitator superfamily domain containing 14C                                        |
| 1,04 | COL9A2                 | collagen, type IX, alpha 2                                                                 |
| 1,04 | COL6A6                 | collagen, type VI, alpha 6                                                                 |
| 1,04 | UNC13A                 | unc-13 homolog A (C. elegans)                                                              |
| 1,04 | C6orf132               | Zhang2013 ALT_ACCEPTOR, ALT_DONOR, coding, INTERNAL, intronic best transcript NM_001164446 |
| 1,04 | RBM19                  | RNA binding motif protein 19                                                               |
| 1,04 | TMEM57                 | transmembrane protein 57                                                                   |
| 1,04 | ZFR                    | Transcript Identified by AceView, Entrez Gene ID(s) 51663                                  |
| 1,04 | SLURP1                 | secreted LY6/PLAUR domain containing 1                                                     |
| 1,04 | HOXC6; HOXC4;<br>HOXC5 | homeobox C6; homeobox C4; homeobox C5                                                      |
| 1,04 | MCM8                   | minichromosome maintenance 8 homologous recombination repair factor                        |
| 1,03 | SCFD2                  | sec1 family domain containing 2                                                            |
| 1,03 | IDNK                   | idnK, gluconokinase homolog (E. coli)                                                      |
| 1,03 | ZNF429                 | zinc finger protein 429                                                                    |
| 1,03 | KCNJ5                  | potassium channel, inwardly rectifying subfamily J, member 5                               |
| 1,03 | OR2T11                 | olfactory receptor, family 2, subfamily T, member 11 (gene/pseudogene)                     |
| 1,03 | AWAT1                  | acyl-CoA wax alcohol acyltransferase 1                                                     |
| 1,03 | LRRC46                 | leucine rich repeat containing 46                                                          |
| 1,03 | MUC21                  | mucin 21, cell surface associated                                                          |
| 1,03 | TTBK1                  | tau tubulin kinase 1                                                                       |

|      |                        |                                                                           |
|------|------------------------|---------------------------------------------------------------------------|
| 1,03 | MTRNR2L2;<br>MTRNR2L12 | MT-RNR2-like 2; MT-RNR2-like 12                                           |
| 1,03 | ADAM10                 | ADAM metallopeptidase domain 10                                           |
| 1,03 | GRK5                   | G protein-coupled receptor kinase 5                                       |
| 1,03 | GUCY2C                 | guanylate cyclase 2C                                                      |
| 1,03 | ADH1C                  | alcohol dehydrogenase 1C (class I), gamma polypeptide                     |
| 1,03 | TTLL10                 | tubulin tyrosine ligase-like family member 10                             |
| 1,03 | PSMC4                  | proteasome 26S subunit, ATPase 4 [Source:HGNC Symbol;Acc:HGNC:9551]       |
| 1,03 | CDK5RAP1               | CDK5 regulatory subunit associated protein 1                              |
| 1,03 | ENC1                   | ectodermal-neural cortex 1 (with BTB domain)                              |
| 1,03 | BECN2                  | beclin 2                                                                  |
| 1,03 | SPIDR                  | scaffolding protein involved in DNA repair                                |
| 1,03 | ADAM15                 | ADAM metallopeptidase domain 15                                           |
| 1,03 | SIGLECL1               | SIGLEC family like 1                                                      |
| 1,03 | POR; MIR4651           | P450 (cytochrome) oxidoreductase; microRNA 4651                           |
| 1,03 | DCLRE1C                | DNA cross-link repair 1C                                                  |
| 1,03 | HMBS                   | hydroxymethylbilane synthase                                              |
| 1,03 | TIPARP                 | Memczak2013 ANTISENSE, CDS, coding, INTERNAL best transcript NM_001184717 |
| 1,03 | SLC26A1                | solute carrier family 26 (anion exchanger), member 1                      |
| 1,03 | GGNBP2                 | gametogenetin binding protein 2                                           |
| 1,03 | GPR150                 | G protein-coupled receptor 150                                            |
| 1,03 | DCAF6                  | DDB1 and CUL4 associated factor 6                                         |
| 1,03 | DPEP1                  | dipeptidase 1 (renal)                                                     |
| 1,03 | CDH15                  | cadherin 15, type 1, M-cadherin (myotubule)                               |
| 1,03 | ILK                    | integrin linked kinase                                                    |
| 1,03 | CCDC84                 | coiled-coil domain containing 84                                          |
| 1,03 | APELA                  | apelin receptor early endogenous ligand                                   |
| 1,03 | ERCC6L                 | excision repair cross-complementation group 6-like                        |
| 1,03 | FUBP3                  | far upstream element (FUSE) binding protein 3                             |
| 1,03 | CD300LD                | CD300 molecule-like family member d                                       |
| 1,03 | NKX6-3                 | NK6 homeobox 3                                                            |
| 1,03 | EWSR1                  | EWS RNA binding protein 1                                                 |
| 1,03 | NDUFB11                | NADH dehydrogenase (ubiquinone) 1 beta subcomplex, 11, 17.3kDa            |
| 1,03 | FAM209B                | family with sequence similarity 209, member B                             |
| 1,03 | C11orf21               | chromosome 11 open reading frame 21                                       |
| 1,03 | KLRC3                  | killer cell lectin-like receptor subfamily C, member 3                    |
| 1,03 | ZBTB6                  | zinc finger and BTB domain containing 6                                   |
| 1,03 | C1QTNF3-AMACR          | C1QTNF3-AMACR readthrough (NMD candidate)                                 |
| 1,03 | CSF3R                  | Memczak2013 ANTISENSE, CDS, coding, INTERNAL best transcript NM_156039    |
| 1,03 | ZNF81                  | zinc finger protein 81                                                    |
| 1,03 | NPRL2                  | NPR2-like, GATOR1 complex subunit                                         |
| 1,03 | PPWD1                  | peptidylprolyl isomerase domain and WD repeat containing 1                |
| 1,03 | TBX22                  | T-box 22                                                                  |

|      |                     |                                                                                                     |
|------|---------------------|-----------------------------------------------------------------------------------------------------|
| 1,03 | ORC2                | origin recognition complex subunit 2                                                                |
| 1,03 | KRTAP4-12           | keratin associated protein 4-12                                                                     |
| 1,03 | ZDHHC18             | zinc finger, DHHC-type containing 18                                                                |
| 1,03 | NUP210L;<br>MIR5698 | nucleoporin 210kDa like; microRNA 5698                                                              |
| 1,03 | TCERG1L             | transcription elongation regulator 1-like                                                           |
| 1,03 | TOMM70A             | translocase of outer mitochondrial membrane 70<br>homolog A (S. cerevisiae)                         |
| 1,03 | LMBR1               | limb development membrane protein 1                                                                 |
| 1,03 | RHOA                | ras homolog family member A                                                                         |
| 1,03 | CAND2               | cullin-associated and neddylation-dissociated 2<br>(putative)                                       |
| 1,03 | BTG1;<br>LINC01619  | B-cell translocation gene 1, anti-proliferative; long<br>intergenic non-protein coding RNA 1619     |
| 1,03 | NBL1                | neuroblastoma 1, DAN family BMP antagonist                                                          |
| 1,03 | SAG                 | S-antigen; retina and pineal gland (arrestin)                                                       |
| 1,03 | MTFR1L              | mitochondrial fission regulator 1-like                                                              |
| 1,03 | BTK                 | Bruton agammaglobulinemia tyrosine kinase                                                           |
| 1,03 | ZNF512              | zinc finger protein 512                                                                             |
| 1,03 | TMEM131             | transmembrane protein 131                                                                           |
| 1,03 | TRIM31              | tripartite motif containing 31                                                                      |
| 1,03 | FAM83E              | family with sequence similarity 83, member E                                                        |
| 1,03 | RHO                 | rhodopsin                                                                                           |
| 1,03 | ZKSCAN8             | zinc finger with KRAB and SCAN domains 8                                                            |
| 1,03 | NGRN; TTLL13P       | neugrin, neurite outgrowth associated; tubulin tyrosine<br>ligase-like family member 13, pseudogene |
| 1,03 | TOMM22              | translocase of outer mitochondrial membrane 22<br>homolog (yeast)                                   |
| 1,03 | C17orf96            | chromosome 17 open reading frame 96                                                                 |
| 1,03 | CCL17               | chemokine (C-C motif) ligand 17                                                                     |
| 1,03 | KREMEN2             | kringle containing transmembrane protein 2                                                          |
| 1,03 | PCDH7               | protocadherin 7                                                                                     |
| 1,03 | ZDHHC3              | zinc finger, DHHC-type containing 3                                                                 |
| 1,03 | RITA1               | RBPJ interacting and tubulin associated 1                                                           |
| 1,03 | UGT2B7              | UDP glucuronosyltransferase 2 family, polypeptide B7                                                |
| 1,03 | PHC3                | polyhomeotic homolog 3 (Drosophila)                                                                 |
| 1,03 | NPM1                | Zhang2013 ALT_ACCEPTOR, ALT_DONOR, coding,<br>INTERNAL, intronic best transcript NM_002520          |
| 1,03 | BAALC-AS2           | BAALC antisense RNA 2                                                                               |
| 1,03 | SLC46A1             | solute carrier family 46 (folate transporter), member 1                                             |
| 1,03 | PLPP2               | phospholipid phosphatase 2                                                                          |
| 1,03 | ECHDC2              | enoyl-CoA hydratase domain containing 2                                                             |
| 1,03 | TFAP2B              | transcription factor AP-2 beta (activating enhancer<br>binding protein 2 beta)                      |
| 1,03 | C2orf44             | chromosome 2 open reading frame 44                                                                  |
| 1,03 | COLEC12             | collectin sub-family member 12                                                                      |
| 1,03 | C5orf66             | chromosome 5 open reading frame 66                                                                  |
| 1,03 | ATG4C               | autophagy related 4C, cysteine peptidase                                                            |

|      |                                                                              |                                                                                                                                                                                                                                                                                                                                                                                                                                                                                                                                                                                                                                                                                                                                                                                                                                                        |
|------|------------------------------------------------------------------------------|--------------------------------------------------------------------------------------------------------------------------------------------------------------------------------------------------------------------------------------------------------------------------------------------------------------------------------------------------------------------------------------------------------------------------------------------------------------------------------------------------------------------------------------------------------------------------------------------------------------------------------------------------------------------------------------------------------------------------------------------------------------------------------------------------------------------------------------------------------|
| 1,03 | CLK2                                                                         | CDC like kinase 2                                                                                                                                                                                                                                                                                                                                                                                                                                                                                                                                                                                                                                                                                                                                                                                                                                      |
| 1,03 | ADAMTS12                                                                     | ADAM metalloproteinase with thrombospondin type 1 motif 12                                                                                                                                                                                                                                                                                                                                                                                                                                                                                                                                                                                                                                                                                                                                                                                             |
| 1,03 | LRMP                                                                         | lymphoid-restricted membrane protein                                                                                                                                                                                                                                                                                                                                                                                                                                                                                                                                                                                                                                                                                                                                                                                                                   |
| 1,03 | HOXD10                                                                       | homeobox D10                                                                                                                                                                                                                                                                                                                                                                                                                                                                                                                                                                                                                                                                                                                                                                                                                                           |
| 1,03 | CRYBA1                                                                       | crystallin beta A1                                                                                                                                                                                                                                                                                                                                                                                                                                                                                                                                                                                                                                                                                                                                                                                                                                     |
| 1,03 | TP53TG3B                                                                     | TP53 target 3B                                                                                                                                                                                                                                                                                                                                                                                                                                                                                                                                                                                                                                                                                                                                                                                                                                         |
| 1,03 | TP53TG3B;<br>TP53TG3C;<br>TP53TG3;<br>LOC102723655;<br>RP11-23E10.6          | Homo sapiens TP53 target 3B (TP53TG3B), transcript variant 1, mRNA.; Homo sapiens TP53 target 3C (TP53TG3C), transcript variant 1, mRNA.; Homo sapiens TP53 target 3 (TP53TG3), transcript variant 1, mRNA.; Homo sapiens TP53 target 3 (TP53TG3), transcript variant 3, non-coding RNA.; Homo sapiens TP53 target 3B (TP53TG3B), transcript variant 3, non-coding RNA.; Homo sapiens TP53 target 3 (TP53TG3), transcript variant 4, non-coding RNA.; Homo sapiens TP53 target 3C (TP53TG3C), transcript variant 3, non-coding RNA.; TP53-target gene 3 protein; Homo sapiens TP53 target 3, mRNA (cDNA clone MGC:119889 IMAGE:40015196), complete cds.; Homo sapiens TP53 target 3, mRNA (cDNA clone MGC:119888 IMAGE:40015195), complete cds.; TP53 target gene 3 protein [Source:UniProtKB/Swiss-Prot;Acc:Q9ULZ0]                                   |
| 1,03 | TP53TG3B;<br>TP53TG3C;<br>TP53TG3;<br>LOC102723655;<br>hotema; RP11-1277H1.5 | Homo sapiens TP53 target 3B (TP53TG3B), transcript variant 1, mRNA.; Homo sapiens TP53 target 3C (TP53TG3C), transcript variant 1, mRNA.; Homo sapiens TP53 target 3 (TP53TG3), transcript variant 1, mRNA.; Homo sapiens TP53 target 3 (TP53TG3), transcript variant 3, non-coding RNA.; Homo sapiens TP53 target 3B (TP53TG3B), transcript variant 3, non-coding RNA.; Homo sapiens TP53 target 3 (TP53TG3), transcript variant 4, non-coding RNA.; Homo sapiens TP53 target 3C (TP53TG3C), transcript variant 3, non-coding RNA.; TP53-target gene 3 protein; Homo sapiens TP53 target 3, mRNA (cDNA clone MGC:119889 IMAGE:40015196), complete cds.; Homo sapiens TP53 target 3, mRNA (cDNA clone MGC:119888 IMAGE:40015195), complete cds.; Transcript Identified by AceView; TP53-target gene 3 protein [Source:UniProtKB/Swiss-Prot;Acc:Q9ULZ0] |
| 1,03 | MTRNR2L8;<br>MIR4485                                                         | MT-RNR2-like 8; microRNA 4485                                                                                                                                                                                                                                                                                                                                                                                                                                                                                                                                                                                                                                                                                                                                                                                                                          |
| 1,03 | TRMU                                                                         | tRNA 5-methylaminomethyl-2-thiouridylate methyltransferase                                                                                                                                                                                                                                                                                                                                                                                                                                                                                                                                                                                                                                                                                                                                                                                             |
| 1,03 | PCIF1                                                                        | PDX1 C-terminal inhibiting factor 1                                                                                                                                                                                                                                                                                                                                                                                                                                                                                                                                                                                                                                                                                                                                                                                                                    |
| 1,03 | NANS                                                                         | N-acetylneuraminic acid synthase                                                                                                                                                                                                                                                                                                                                                                                                                                                                                                                                                                                                                                                                                                                                                                                                                       |
| 1,03 | TRIM25;<br>MIR3614                                                           | tripartite motif containing 25; microRNA 3614                                                                                                                                                                                                                                                                                                                                                                                                                                                                                                                                                                                                                                                                                                                                                                                                          |

|      |                          |                                                                                                                             |
|------|--------------------------|-----------------------------------------------------------------------------------------------------------------------------|
| 1,03 | KIAA1143                 | KIAA1143 [Source:HGNC Symbol;Acc:HGNC:29198]                                                                                |
| 1,03 | LRRFIP1                  | leucine rich repeat (in FLII) interacting protein 1                                                                         |
| 1,03 | ANGPT2                   | angiopoietin 2                                                                                                              |
| 1,03 | HIST1H4J                 | histone cluster 1, H4j                                                                                                      |
| 1,03 | HIST2H2BF                | histone cluster 2, H2bf                                                                                                     |
| 1,03 | MRPL38                   | mitochondrial ribosomal protein L38                                                                                         |
| 1,03 | ATXN7                    | ataxin 7                                                                                                                    |
| 1,03 | LATS1                    | large tumor suppressor kinase 1                                                                                             |
| 1,03 | RALB                     | v-ral simian leukemia viral oncogene homolog B                                                                              |
| 1,03 | TRHR                     | thyrotropin-releasing hormone receptor                                                                                      |
| 1,03 | GLCCI1                   | glucocorticoid induced 1                                                                                                    |
| 1,03 | ZDHHC11                  | zinc finger, DHHC-type containing 11                                                                                        |
| 1,03 | HIGD1A                   | HIG1 hypoxia inducible domain family, member 1A                                                                             |
| 1,03 | SAG                      | S-antigen; retina and pineal gland (arrestin)                                                                               |
| 1,03 | YJEFN3                   | YjeF N-terminal domain containing 3                                                                                         |
| 1,03 | CYP2D6                   | cytochrome P450, family 2, subfamily D, polypeptide 6                                                                       |
| 1,03 | EDA2R                    | ectodysplasin A2 receptor                                                                                                   |
| 1,03 | KIR3DX1                  | killer cell immunoglobulin-like receptor, three domains, X1                                                                 |
| 1,03 | C9orf40                  | chromosome 9 open reading frame 40                                                                                          |
| 1,03 | HYDIN                    | HYDIN, axonemal central pair apparatus protein                                                                              |
| 1,03 | SCGB2A1                  | secretoglobin, family 2A, member 1                                                                                          |
| 1,03 | CCDC150                  | coiled-coil domain containing 150                                                                                           |
| 1,03 | FBXO46                   | F-box protein 46                                                                                                            |
| 1,03 | KCNQ1                    | potassium channel, voltage gated KQT-like subfamily Q, member 1                                                             |
| 1,03 | SAMD15                   | sterile alpha motif domain containing 15                                                                                    |
| 1,03 | NAALADL1                 | N-acetylated alpha-linked acidic dipeptidase-like 1                                                                         |
| 1,03 | CYP4A22                  | cytochrome P450, family 4, subfamily A, polypeptide 22                                                                      |
| 1,03 | ABCA2                    | ATP binding cassette subfamily A member 2                                                                                   |
| 1,03 | SPDYE4                   | speedy/RINGO cell cycle regulator family member E4                                                                          |
| 1,03 | FAM53C                   | family with sequence similarity 53, member C                                                                                |
| 1,03 | PINX1; MIR1322           | PIN2/TERF1 interacting, telomerase inhibitor 1; microRNA 1322                                                               |
| 1,03 | LOC105371242; AC243756.1 | peptidyl-prolyl cis-trans isomerase A-like 4G; Peptidyl-prolyl cis-trans isomerase [Source:UniProtKB/TrEMBL;Acc:A0A075B767] |
| 1,03 | ATOH8                    | atonal bHLH transcription factor 8                                                                                          |
| 1,03 | EXD3                     | exonuclease 3-5 domain containing 3                                                                                         |
| 1,03 | NGLY1                    | N-glycanase 1                                                                                                               |
| 1,03 | CTSW                     | cathepsin W                                                                                                                 |
| 1,03 | LYL1                     | Memczak2013 ANTISENSE, coding, INTERNAL, UTR5 best transcript NM_005583                                                     |
| 1,03 | VPS33A                   | vacuolar protein sorting 33 homolog A (S. cerevisiae)                                                                       |
| 1,03 | RIOK2                    | RIO kinase 2                                                                                                                |
| 1,03 | RANGRF                   | RAN guanine nucleotide release factor                                                                                       |

|      |           |                                                                                                     |
|------|-----------|-----------------------------------------------------------------------------------------------------|
| 1,03 | KCMF1     | potassium channel modulatory factor 1                                                               |
| 1,03 | ELF4      | E74-like factor 4 (ets domain transcription factor)                                                 |
| 1,03 | SCGB3A2   | secretoglobin, family 3A, member 2                                                                  |
| 1,03 | ELFN2     | Transcript Identified by AceView, Entrez Gene ID(s)<br>114794                                       |
| 1,03 | BCL2L14   | BCL2-like 14 (apoptosis facilitator)                                                                |
| 1,03 | GADD45A   | growth arrest and DNA-damage-inducible, alpha                                                       |
| 1,03 | BIN2      | bridging integrator 2                                                                               |
| 1,03 | RLTPR     | RGD motif, leucine rich repeats, tropomodulin domain<br>and proline-rich containing                 |
| 1,03 | SPNS1     | spinster homolog 1 (Drosophila)                                                                     |
| 1,03 | SLC51A    | solute carrier family 51, alpha subunit                                                             |
| 1,03 | LSR       | lipolysis stimulated lipoprotein receptor                                                           |
| 1,03 | SFRP1     | secreted frizzled-related protein 1                                                                 |
| 1,03 | SFT2D2    | SFT2 domain containing 2                                                                            |
| 1,03 | A4GALT    | alpha 1,4-galactosyltransferase                                                                     |
| 1,03 | PCDHB7    | protocadherin beta 7                                                                                |
| 1,03 | RDH5      | retinol dehydrogenase 5 (11-cis/9-cis)                                                              |
| 1,03 | LINC01429 | long intergenic non-protein coding RNA 1429                                                         |
| 1,03 | TNFRSF12A | tumor necrosis factor receptor superfamily, member<br>12A                                           |
| 1,03 | PSMC4     | proteasome 26S subunit, ATPase 4 [Source:HGNC<br>Symbol;Acc:HGNC:9551]                              |
| 1,03 | STAG3L1   | stromal antigen 3-like 1 (pseudogene)                                                               |
| 1,03 | PTPN23    | Jeck2013 ANTISENSE, CDS, coding, INTERNAL,<br>intronic, OVCODE, OVEXON best transcript<br>NM_015466 |
| 1,03 | RNF10     | ring finger protein 10                                                                              |
| 1,03 | CHRAC1    | chromatin accessibility complex 1                                                                   |
| 1,03 | ATXN2L    | ataxin 2-like                                                                                       |
| 1,03 | ZNF223    | zinc finger protein 223                                                                             |
| 1,03 | MMS22L    | MMS22-like, DNA repair protein                                                                      |
| 1,03 | PIGA      | phosphatidylinositol glycan anchor biosynthesis class<br>A                                          |
| 1,03 | GLYATL3   | glycine-N-acyltransferase-like 3                                                                    |
| 1,03 | TCP10L2   | t-complex 10-like 2                                                                                 |
| 1,03 | PARN      | poly(A)-specific ribonuclease                                                                       |
| 1,03 | AOC2      | amine oxidase, copper containing 2 (retina-specific)                                                |
| 1,03 | MTO1      | mitochondrial tRNA translation optimization 1                                                       |
| 1,03 | TUBGCP3   | Memczak2013 ANTISENSE, coding, INTERNAL,<br>intronic best transcript NM_006322                      |
| 1,03 | SRPR      | signal recognition particle receptor (docking protein)                                              |
| 1,03 | NPRL3     | NPR3-like, GATOR1 complex subunit                                                                   |
| 1,03 | FAM25A    | family with sequence similarity 25, member A                                                        |
| 1,03 | FAM19A3   | family with sequence similarity 19 (chemokine (C-C<br>motif)-like), member A3                       |
| 1,03 | SLC16A1   | solute carrier family 16 (monocarboxylate transporter),<br>member 1                                 |
| 1,03 | CLEC4E    | C-type lectin domain family 4, member E                                                             |
| 1,03 | THEG      | theg spermatid protein                                                                              |

|      |                              |                                                                                                          |
|------|------------------------------|----------------------------------------------------------------------------------------------------------|
| 1,03 | AMBP                         | alpha-1-microglobulin/bikunin precursor                                                                  |
| 1,03 | KCNIP1                       | Kv channel interacting protein 1                                                                         |
| 1,03 | RPAP1                        | RNA polymerase II associated protein 1                                                                   |
| 1,03 | CDK4                         | cyclin-dependent kinase 4                                                                                |
| 1,03 | SAMD9                        | sterile alpha motif domain containing 9                                                                  |
| 1,03 | SLC25A26                     | solute carrier family 25 (S-adenosylmethionine carrier), member 26                                       |
| 1,03 | POPDC2                       | popeye domain containing 2                                                                               |
| 1,03 | CLHC1                        | clathrin heavy chain linker domain containing 1                                                          |
| 1,03 | SRP19; ZRSR1                 | signal recognition particle 19kDa; zinc finger (CCCH type), RNA binding motif and serine/arginine rich 1 |
| 1,03 | PRR23B                       | proline rich 23B                                                                                         |
| 1,03 | C1orf95                      | chromosome 1 open reading frame 95                                                                       |
| 1,03 | CCR7                         | chemokine (C-C motif) receptor 7                                                                         |
| 1,03 | MBOAT2                       | membrane bound O-acyltransferase domain containing 2                                                     |
| 1,03 | MRPS30                       | mitochondrial ribosomal protein S30                                                                      |
| 1,03 | TMEM50B                      | transmembrane protein 50B                                                                                |
| 1,03 | FAM197Y1                     | family with sequence similarity 197, Y-linked, member 1                                                  |
| 1,03 | CYP2D6                       | cytochrome P450, family 2, subfamily D, polypeptide 6                                                    |
| 1,03 | LOR                          | loricrin                                                                                                 |
| 1,03 | ZBTB42                       | zinc finger and BTB domain containing 42                                                                 |
| 1,03 | ACAT1                        | acetyl-CoA acetyltransferase 1                                                                           |
| 1,03 | KLHL3                        | Transcript Identified by AceView, Entrez Gene ID(s) 26249                                                |
| 1,03 | SLIRP                        | SRA stem-loop interacting RNA binding protein                                                            |
| 1,03 | GAGE2B;<br>GAGE2A;<br>GAGE2C | G antigen 2B; G antigen 2A; G antigen 2C                                                                 |
| 1,03 | SLC10A3                      | solute carrier family 10, member 3                                                                       |
| 1,03 | OR2W3                        | olfactory receptor, family 2, subfamily W, member 3                                                      |
| 1,03 | BTF3L4                       | basic transcription factor 3-like 4                                                                      |
| 1,03 | CAMSAP2                      | calmodulin regulated spectrin-associated protein family, member 2                                        |
| 1,03 | HIST2H2AC                    | histone cluster 2, H2ac                                                                                  |
| 1,03 | KLHDC4                       | kelch domain containing 4                                                                                |
| 1,03 | SSTR1                        | somatostatin receptor 1                                                                                  |
| 1,03 | CFL1                         | cofilin 1 (non-muscle)                                                                                   |
| 1,03 | C1QTNF4                      | C1q and tumor necrosis factor related protein 4                                                          |
| 1,03 | FAS                          | Fas cell surface death receptor                                                                          |
| 1,03 | IGFL4                        | IGF like family member 4                                                                                 |
| 1,03 | TSPAN8                       | tetraspanin 8                                                                                            |
| 1,03 | SMAD3                        | SMAD family member 3                                                                                     |
| 1,03 | KRT35                        | keratin 35, type I                                                                                       |
| 1,03 | CDV3                         | CDV3 homolog (mouse)                                                                                     |
| 1,03 | MPST                         | mercaptopyruvate sulfurtransferase                                                                       |
| 1,03 | ACTN4                        | actinin, alpha 4                                                                                         |
| 1,03 | TOX4                         | TOX high mobility group box family member 4                                                              |

|      |                                 |                                                                                                    |
|------|---------------------------------|----------------------------------------------------------------------------------------------------|
| 1,03 | PLEKHH1                         | pleckstrin homology domain containing, family H (with MyTH4 domain) member 1                       |
| 1,03 | RSPRY1                          | ring finger and SPRY domain containing 1                                                           |
| 1,03 | MAP3K10                         | mitogen-activated protein kinase kinase kinase 10                                                  |
| 1,03 | SLC30A3                         | solute carrier family 30 (zinc transporter), member 3                                              |
| 1,03 | FECH                            | ferrochelatase                                                                                     |
| 1,03 | C19orf73                        | chromosome 19 open reading frame 73                                                                |
| 1,03 | PTAR1                           | protein prenyltransferase alpha subunit repeat containing 1                                        |
| 1,03 | KLHL31                          | kelch-like family member 31                                                                        |
| 1,03 | GGT6                            | gamma-glutamyltransferase 6                                                                        |
| 1,03 | PADI1                           | peptidyl arginine deiminase, type I                                                                |
| 1,03 | RPL28; MIR6805                  | ribosomal protein L28; microRNA 6805                                                               |
| 1,03 | NOTCH1                          | notch 1                                                                                            |
| 1,03 | SMN1; SMN2                      | survival of motor neuron 1, telomeric; survival of motor neuron 2, centromeric                     |
| 1,03 | ZNF648                          | zinc finger protein 648                                                                            |
| 1,03 | SAMD4B                          | sterile alpha motif domain containing 4B                                                           |
| 1,03 | CLLU1OS                         | chronic lymphocytic leukemia up-regulated 1 opposite strand                                        |
| 1,03 | OLIG2                           | oligodendrocyte lineage transcription factor 2                                                     |
| 1,03 | OR4Q3                           | olfactory receptor, family 4, subfamily Q, member 3                                                |
| 1,03 | NOSTRIN                         | nitric oxide synthase trafficking                                                                  |
| 1,03 | DHTKD1                          | dehydrogenase E1 and transketolase domain containing 1                                             |
| 1,03 | METTL21B                        | methyltransferase like 21B                                                                         |
| 1,03 | NPAS1                           | neuronal PAS domain protein 1                                                                      |
| 1,03 | AFF4                            | Memczak2013 ANTISENSE, CDS, coding, INTERNAL best transcript NM_014423                             |
| 1,03 | RASGEF1C                        | RasGEF domain family member 1C                                                                     |
| 1,03 | CNTLN                           | centlein, centrosomal protein                                                                      |
| 1,03 | FAAH2                           | fatty acid amide hydrolase 2                                                                       |
| 1,03 | GYS1                            | glycogen synthase 1 (muscle)                                                                       |
| 1,03 | SKIV2L2                         | superkiller viralicidic activity 2-like 2 (S. cerevisiae)                                          |
| 1,03 | DYRK1B                          | dual specificity tyrosine-(Y)-phosphorylation regulated kinase 1B                                  |
| 1,03 | ATAD2B                          | ATPase family, AAA domain containing 2B                                                            |
| 1,03 | CD55                            | CD55 molecule, decay accelerating factor for complement (Cromer blood group)                       |
| 1,03 | TRIT1                           | tRNA isopentenyltransferase 1                                                                      |
| 1,03 | ANO6                            | anoctamin 6                                                                                        |
| 1,03 | DUSP7                           | dual specificity phosphatase 7                                                                     |
| 1,03 | SF3A1                           | splicing factor 3a, subunit 1, 120kDa                                                              |
| 1,03 | RXFP2                           | relaxin/insulin-like family peptide receptor 2                                                     |
| 1,03 | DLEU2; MIR15A; MIR16-1; MIR3613 | deleted in lymphocytic leukemia 2 (non-protein coding); microRNA 15a; microRNA 16-1; microRNA 3613 |
| 1,03 | LRIG1                           |                                                                                                    |
| 1,03 | EIF3F                           | Eukaryotic translation initiation factor 3 subunit F [Source:UniProtKB/Swiss-Prot;Acc:O00303]      |

|      |                                       |                                                                                                 |
|------|---------------------------------------|-------------------------------------------------------------------------------------------------|
| 1,03 | GRWD1                                 | glutamate-rich WD repeat containing 1                                                           |
| 1,03 | ADRA1D                                | adrenoceptor alpha 1D                                                                           |
| 1,03 | AMBRA1                                | autophagy/beclin-1 regulator 1                                                                  |
| 1,03 | MRGPRG-AS1                            | MRGPRG antisense RNA 1                                                                          |
| 1,03 | HCG27                                 | HLA complex group 27 (non-protein coding)                                                       |
| 1,03 | MCTP1                                 | multiple C2 domains, transmembrane 1                                                            |
| 1,03 | OTOF                                  | otoferlin                                                                                       |
| 1,03 | MMADHC                                | methylmalonic aciduria (cobalamin deficiency) cblD type, with homocystinuria                    |
| 1,03 | DDX46                                 | DEAD (Asp-Glu-Ala-Asp) box polypeptide 46                                                       |
| 1,03 | PSPH                                  | phosphoserine phosphatase                                                                       |
| 1,03 | HECTD2                                | Transcript Identified by AceView, Entrez Gene ID(s) 143279                                      |
| 1,03 | LMO7DN                                | LMO7 downstream neighbor                                                                        |
| 1,03 | LANCL2                                | LanC lantibiotic synthetase component C-like 2 (bacterial)                                      |
| 1,03 | RTP5                                  | receptor (chemosensory) transporter protein 5 (putative)                                        |
| 1,03 | GOLGA8O                               | golgin A8 family, member O                                                                      |
| 1,03 | OR5B3                                 | olfactory receptor, family 5, subfamily B, member 3                                             |
| 1,03 | SNAPC1                                | small nuclear RNA activating complex polypeptide 1                                              |
| 1,03 | ABHD3                                 | abhydrolase domain containing 3                                                                 |
| 1,03 | TFDP1                                 | transcription factor Dp-1                                                                       |
| 1,03 | HMBS                                  | hydroxymethylbilane synthase                                                                    |
| 1,03 | RP11-351M8.2;<br>MESDC2; RP11-351M8.1 | Transcript Identified by AceView, Entrez Gene ID(s) 23184; novel transcript, antisense to CEMIP |
| 1,03 | ATF6                                  | activating transcription factor 6                                                               |
| 1,03 | PIK3CA                                | phosphatidylinositol-4,5-bisphosphate 3-kinase, catalytic subunit alpha                         |
| 1,03 | POLR3K                                | polymerase (RNA) III (DNA directed) polypeptide K, 12.3 kDa                                     |
| 1,03 | NET1                                  | neuroepithelial cell transforming 1                                                             |
| 1,03 | WNT7A                                 | wingless-type MMTV integration site family, member 7A                                           |
| 1,03 | NKAIN1                                | Na <sup>+</sup> /K <sup>+</sup> transporting ATPase interacting 1                               |
| 1,03 | OR51B6                                | olfactory receptor, family 51, subfamily B, member 6                                            |
| 1,03 | KLK11                                 | kallikrein related peptidase 11                                                                 |
| 1,03 | CLDN10                                | claudin 10                                                                                      |
| 1,03 | CCL28                                 | chemokine (C-C motif) ligand 28                                                                 |
| 1,03 | THBD                                  | thrombomodulin                                                                                  |
| 1,03 | PPP2R2A                               | protein phosphatase 2, regulatory subunit B, alpha                                              |
| 1,03 | C17orf107                             | chromosome 17 open reading frame 107                                                            |
| 1,03 | ZSWIM8                                | zinc finger, SWIM-type containing 8                                                             |
| 1,03 | SMIM10L1                              | small integral membrane protein 10 like 1                                                       |
| 1,03 | RBBP6                                 | retinoblastoma binding protein 6                                                                |
| 1,03 | POLR3H                                | polymerase (RNA) III (DNA directed) polypeptide H (22.9kD)                                      |
| 1,03 | SLC9A8                                | solute carrier family 9, subfamily A (NHE8, cation proton antiporter 8), member 8               |

|      |                       |                                                                                            |
|------|-----------------------|--------------------------------------------------------------------------------------------|
| 1,03 | GSPT1                 | G1 to S phase transition 1                                                                 |
| 1,03 | HIST2H4A;<br>HIST2H4B | histone cluster 2, H4a; histone cluster 2, H4b                                             |
| 1,03 | NCMAP                 | noncompact myelin associated protein                                                       |
| 1,03 | RPS28                 | ribosomal protein S28                                                                      |
| 1,03 | PLIN3                 | perilipin 3                                                                                |
| 1,03 | PPP1R26               | protein phosphatase 1, regulatory subunit 26                                               |
| 1,03 | CHAC2                 | ChaC, cation transport regulator homolog 2 (E. coli)                                       |
| 1,03 | CASD1                 | CAS1 domain containing 1                                                                   |
| 1,03 | EPPIN                 | epididymal peptidase inhibitor                                                             |
| 1,03 | ATP13A3               | Transcript Identified by AceView, Entrez Gene ID(s)<br>79572                               |
| 1,03 | RALGPS1               | Ral GEF with PH domain and SH3 binding motif 1                                             |
| 1,03 | BET1                  | Bet1 golgi vesicular membrane trafficking protein                                          |
| 1,03 | LYRM5                 | LYR motif containing 5                                                                     |
| 1,03 | MREG                  | melanoregulin                                                                              |
| 1,03 | TMSB15B               | thymosin beta 15B                                                                          |
| 1,03 | AKT1S1                | AKT1 substrate 1 (proline rich)                                                            |
| 1,03 | OPA1                  | optic atrophy 1 (autosomal dominant)                                                       |
| 1,03 | NETO2                 | neuropilin (NRP) and tolloid (TLL)-like 2                                                  |
| 1,03 | NPAS3                 | neuronal PAS domain protein 3                                                              |
| 1,03 | CA12                  | carbonic anhydrase XII                                                                     |
| 1,03 | MMP3                  | matrix metalloproteinase 3                                                                 |
| 1,03 | ORAI3                 | ORAI calcium release-activated calcium modulator 3                                         |
| 1,03 | CLDN11                | claudin 11                                                                                 |
| 1,03 | SEC24C                | SEC24 homolog C, COPII coat complex component                                              |
| 1,03 | ARF6                  | ADP-ribosylation factor 6                                                                  |
| 1,03 | AGPS                  | alkylglycerone phosphate synthase                                                          |
| 1,03 | GPR157                | G protein-coupled receptor 157                                                             |
| 1,03 | ADAMTSL2              | ADAMTS like 2                                                                              |
| 1,03 | AP1B1                 | Zhang2013 ALT_ACCEPTOR, ALT_DONOR, coding,<br>INTERNAL, intronic best transcript NM_001127 |
| 1,03 | BTNL10                | butyrophilin-like 10                                                                       |
| 1,03 | CDK6                  | cyclin-dependent kinase 6                                                                  |
| 1,03 | GAL3ST3               | galactose-3-O-sulfotransferase 3                                                           |
| 1,03 | FLRT1                 | fibronectin leucine rich transmembrane protein 1                                           |
| 1,03 | MAFIP;<br>TEKT4P2     | MAFF interacting protein (pseudogene); tektin 4<br>pseudogene 2                            |
| 1,03 | TMEM147               | transmembrane protein 147                                                                  |
| 1,03 | RCN1                  | reticulocalbin 1, EF-hand calcium binding domain                                           |
| 1,03 | PRAC2                 | prostate cancer susceptibility candidate 2                                                 |
| 1,03 | UVSSA                 | UV stimulated scaffold protein A                                                           |
| 1,03 | ATP6V0A4              | ATPase, H <sup>+</sup> transporting, lysosomal V0 subunit a4                               |
| 1,03 | NKD1                  | naked cuticle homolog 1 (Drosophila)                                                       |
| 1,03 | FAM83D                | family with sequence similarity 83, member D                                               |
| 1,03 | ROPN1B                | rhophilin associated tail protein 1B                                                       |
| 1,03 | MTTP                  | microsomal triglyceride transfer protein                                                   |
| 1,03 | KRTAP9-9              | keratin associated protein 9-9                                                             |
| 1,03 | MEP1B                 | meprin A, beta                                                                             |

|      |                         |                                                                                                                                 |
|------|-------------------------|---------------------------------------------------------------------------------------------------------------------------------|
| 1,03 | DNAJC14                 | DnaJ (Hsp40) homolog, subfamily C, member 14                                                                                    |
| 1,03 | dorsnarby;<br>IGF2BP2   | Transcript Identified by AceView; Zhang2013<br>ALT_ACCEPTOR, ALT_DONOR, coding,<br>INTERNAL, intronic best transcript NM_006548 |
| 1,03 | RALA                    | v-ral simian leukemia viral oncogene homolog A (ras<br>related)                                                                 |
| 1,03 | ENAH                    | enabled homolog (Drosophila)                                                                                                    |
| 1,03 | FKBP14                  | FK506 binding protein 14                                                                                                        |
| 1,03 | C1orf162                | chromosome 1 open reading frame 162                                                                                             |
| 1,03 | DNAH5                   | dynein, axonemal, heavy chain 5                                                                                                 |
| 1,03 | LY6D                    | lymphocyte antigen 6 complex, locus D                                                                                           |
| 1,03 | GLIPR1                  | GLI pathogenesis-related 1                                                                                                      |
| 1,03 | ASNS                    | asparagine synthetase (glutamine-hydrolyzing)                                                                                   |
| 1,03 | NDUFA5                  | NADH dehydrogenase (ubiquinone) 1 alpha<br>subcomplex, 5                                                                        |
| 1,03 | EGFL7                   | EGF-like-domain, multiple 7                                                                                                     |
| 1,03 | SQSTM1                  | sequestosome 1                                                                                                                  |
| 1,03 | TIMM21                  | translocase of inner mitochondrial membrane 21<br>homolog (yeast)                                                               |
| 1,03 | HERC4                   | HECT and RLD domain containing E3 ubiquitin<br>protein ligase 4                                                                 |
| 1,03 | WDR54                   | WD repeat domain 54                                                                                                             |
| 1,03 | BHLHA15                 | basic helix-loop-helix family, member a15                                                                                       |
| 1,03 | RP2                     | retinitis pigmentosa 2 (X-linked recessive)                                                                                     |
| 1,03 | DOK1                    | docking protein 1                                                                                                               |
| 1,03 | EML5                    | echinoderm microtubule associated protein like 5                                                                                |
| 1,03 | LTA4H                   | leukotriene A4 hydrolase                                                                                                        |
| 1,03 | KRTAP10-3               | keratin associated protein 10-3                                                                                                 |
| 1,03 | KLC2                    | kinesin light chain 2                                                                                                           |
| 1,03 | TOMM34                  | translocase of outer mitochondrial membrane 34                                                                                  |
| 1,03 | DYRK1A                  | dual specificity tyrosine-(Y)-phosphorylation regulated<br>kinase 1A                                                            |
| 1,03 | PPP2R5A                 | protein phosphatase 2, regulatory subunit B, alpha                                                                              |
| 1,03 | SCAMP2                  | secretory carrier membrane protein 2                                                                                            |
| 1,03 | AADACL2                 | arylacetamide deacetylase-like 2                                                                                                |
| 1,03 | C7orf49                 | chromosome 7 open reading frame 49                                                                                              |
| 1,03 | FAM21C                  | family with sequence similarity 21, member C                                                                                    |
| 1,03 | MFS14B                  | major facilitator superfamily domain containing 14B                                                                             |
| 1,03 | FOXL2                   | forkhead box L2                                                                                                                 |
| 1,03 | SLC5A6                  | solute carrier family 5 (sodium/multivitamin and iodide<br>cotransporter), member 6                                             |
| 1,03 | PSMB1                   | proteasome subunit beta 1                                                                                                       |
| 1,03 | CLPTM1                  | cleft lip and palate associated transmembrane protein 1                                                                         |
| 1,03 | KLHDC7A                 | kelch domain containing 7A                                                                                                      |
| 1,03 | SPRR1B                  | small proline-rich protein 1B                                                                                                   |
| 1,03 | AQP2                    | aquaporin 2 (collecting duct)                                                                                                   |
| 1,03 | RP11-295P9.3;<br>PRPF18 | novel transcript; Transcript Identified by AceView,<br>Entrez Gene ID(s) 8559; RP11-295P9.3 (from<br>geneSymbol)                |

|      |                    |                                                                                                      |
|------|--------------------|------------------------------------------------------------------------------------------------------|
| 1,03 | TSN                | translin                                                                                             |
| 1,03 | MLXIP              | MLX interacting protein                                                                              |
| 1,03 | SLC25A24           | solute carrier family 25 (mitochondrial carrier; phosphate carrier), member 24                       |
| 1,03 | CPQ                | carboxypeptidase Q                                                                                   |
| 1,03 | RAB14              | RAB14, member RAS oncogene family                                                                    |
| 1,03 | UPF3B              | UPF3 regulator of nonsense transcripts homolog B (yeast)                                             |
| 1,03 | MAATS1             | MYCBP-associated, testis expressed 1                                                                 |
| 1,03 | EXOC3L2            | exocyst complex component 3-like 2                                                                   |
| 1,03 | INSL6              | insulin-like 6                                                                                       |
| 1,03 | ZCCHC8             | zinc finger, CCHC domain containing 8                                                                |
| 1,03 | YWHAEP7            | tyrosine 3-monooxygenase/tryptophan 5-monooxygenase activation protein, epsilon pseudogene 7         |
| 1,03 | TLL2               | tolloid like 2                                                                                       |
| 1,03 | PWP1               | PWP1 homolog, endonuclease                                                                           |
| 1,03 | TSACC              | TSSK6 activating co-chaperone                                                                        |
| 1,03 | HHAT               | hedgehog acyltransferase                                                                             |
| 1,03 | TMEM229A           | transmembrane protein 229A                                                                           |
| 1,03 | ALG11; UTP14C      | ALG11, alpha-1,2-mannosyltransferase; UTP14, U3 small nucleolar ribonucleoprotein, homolog C (yeast) |
| 1,03 | CD248              | CD248 molecule, endosialin                                                                           |
| 1,03 | CCNB1IP1; SNORD126 | cyclin B1 interacting protein 1, E3 ubiquitin protein ligase; small nucleolar RNA, C/D box 126       |
| 1,03 | PRSS42             | protease, serine 42                                                                                  |
| 1,03 | SLC25A26           | solute carrier family 25 (S-adenosylmethionine carrier), member 26                                   |
| 1,03 | OR51T1             | olfactory receptor, family 51, subfamily T, member 1                                                 |
| 1,03 | VPS11              | VPS11, CORVET/HOPS core subunit [Source:HGNC Symbol;Acc:HGNC:14583]                                  |
| 1,03 | CBLL1              | Cbl proto-oncogene-like 1, E3 ubiquitin protein ligase                                               |
| 1,03 | C17orf100          | chromosome 17 open reading frame 100                                                                 |
| 1,03 | PPP1R15A           | protein phosphatase 1, regulatory subunit 15A                                                        |
| 1,03 | CAST               | calpastatin                                                                                          |
| 1,03 | NTAN1              | N-terminal asparagine amidase                                                                        |
| 1,03 | STAG1              | stromal antigen 1                                                                                    |
| 1,03 | RAD51              | RAD51 recombinase                                                                                    |
| 1,03 | SDHAF2             | succinate dehydrogenase complex assembly factor 2                                                    |
| 1,03 | PA2G4              | proliferation-associated 2G4                                                                         |
| 1,03 | ZMYND10            | zinc finger, MYND-type containing 10                                                                 |
| 1,03 | MAN1A1             | mannosidase, alpha, class 1A, member 1                                                               |
| 1,03 | BAIAP3             | BAI1-associated protein 3                                                                            |
| 1,03 | CDR2               | cerebellar degeneration related protein 2                                                            |
| 1,03 | PRKAA2             | protein kinase, AMP-activated, alpha 2 catalytic subunit                                             |
| 1,03 | MPPED2             | metallophosphoesterase domain containing 2                                                           |
| 1,03 | CEP97              | centrosomal protein 97kDa                                                                            |
| 1,03 | OTOS               | otospiralin                                                                                          |
| 1,03 | SCUBE2             | signal peptide, CUB domain, EGF-like 2                                                               |

|      |                                 |                                                                                                                                              |
|------|---------------------------------|----------------------------------------------------------------------------------------------------------------------------------------------|
| 1,03 | SLC25A11                        | solute carrier family 25 (mitochondrial carrier; oxoglutarate carrier), member 11                                                            |
| 1,03 | MEN1                            | multiple endocrine neoplasia I                                                                                                               |
| 1,03 | MMP28                           | matrix metalloproteinase 28                                                                                                                  |
| 1,03 | NFATC4                          | nuclear factor of activated T-cells, cytoplasmic, calcineurin-dependent 4                                                                    |
| 1,03 | MRGPRX2                         | MAS-related GPR, member X2                                                                                                                   |
| 1,03 | EFHC2                           | EF-hand domain (C-terminal) containing 2                                                                                                     |
| 1,03 | HOXD3                           | homeobox D3                                                                                                                                  |
| 1,03 | SUFU                            | suppressor of fused homolog (Drosophila)                                                                                                     |
| 1,03 | SLC29A1                         | solute carrier family 29 (equilibrative nucleoside transporter), member 1                                                                    |
| 1,03 | SLC6A4                          | solute carrier family 6 (neurotransmitter transporter), member 4                                                                             |
| 1,03 | ANP32B                          | acidic nuclear phosphoprotein 32 family member B                                                                                             |
| 1,03 | FSHR                            | follicle stimulating hormone receptor                                                                                                        |
| 1,03 | MLXIP                           | MLX interacting protein                                                                                                                      |
| 1,03 | LAPTM4B                         | lysosomal protein transmembrane 4 beta                                                                                                       |
| 1,03 | PHF12                           | PHD finger protein 12                                                                                                                        |
| 1,03 | SSB                             | Sjogren syndrome antigen B (autoantigen La)                                                                                                  |
| 1,03 | FGF19                           | fibroblast growth factor 19                                                                                                                  |
| 1,03 | DHRS11                          | dehydrogenase/reductase (SDR family) member 11                                                                                               |
| 1,03 | MICB                            | MHC class I polypeptide-related sequence B                                                                                                   |
| 1,03 | ZNF470                          | zinc finger protein 470                                                                                                                      |
| 1,03 | SLC45A2                         | solute carrier family 45, member 2                                                                                                           |
| 1,03 | DGCR6L                          | DiGeorge syndrome critical region gene 6-like                                                                                                |
| 1,03 | FIP1L1                          | factor interacting with PAPOLA and CPSF1                                                                                                     |
| 1,03 | CYP2D6                          | cytochrome P450, family 2, subfamily D, polypeptide 6                                                                                        |
| 1,03 | PRKCQ                           | protein kinase C, theta                                                                                                                      |
| 1,03 | KIF4A                           | kinesin family member 4A                                                                                                                     |
| 1,03 | CHMP4B                          | charged multivesicular body protein 4B                                                                                                       |
| 1,03 | LINC00615                       | long intergenic non-protein coding RNA 615                                                                                                   |
| 1,03 | DUSP3                           | dual specificity phosphatase 3                                                                                                               |
| 1,03 | CLN5                            | ceroid-lipofuscinosis, neuronal 5                                                                                                            |
| 1,03 | COIL                            | coilin                                                                                                                                       |
| 1,03 | ACTRT3                          | actin-related protein T3                                                                                                                     |
| 1,03 | ZNF32-AS3                       | ZNF32 antisense RNA 3                                                                                                                        |
| 1,03 | SPRR4                           | small proline-rich protein 4                                                                                                                 |
| 1,03 | ZBP2                            | zona pellucida binding protein 2                                                                                                             |
| 1,03 | RGL4                            | ral guanine nucleotide dissociation stimulator-like 4                                                                                        |
| 1,03 | GNB2L1;<br>SNORD95;<br>SNORD96A | guanine nucleotide binding protein (G protein), beta polypeptide 2-like 1; small nucleolar RNA, C/D box 95; small nucleolar RNA, C/D box 96A |
| 1,03 | NFATC1                          | nuclear factor of activated T-cells, cytoplasmic, calcineurin-dependent 1                                                                    |
| 1,03 | MYCBP; GJA9                     | MYC binding protein; gap junction protein alpha 9                                                                                            |
| 1,03 | NEMF                            | nuclear export mediator factor                                                                                                               |
| 1,03 | CDC42                           | cell division cycle 42                                                                                                                       |
| 1,03 | UBA2                            | ubiquitin-like modifier activating enzyme 2                                                                                                  |

|      |                     |                                                                                                     |
|------|---------------------|-----------------------------------------------------------------------------------------------------|
| 1,03 | ZFYVE16             | zinc finger, FYVE domain containing 16                                                              |
| 1,03 | ZNF26               | zinc finger protein 26                                                                              |
| 1,03 | CCNI                | cyclin I                                                                                            |
| 1,03 | IPMK                | inositol polyphosphate multikinase                                                                  |
| 1,03 | ANO5                | anoctamin 5                                                                                         |
| 1,03 | SP8                 | Sp8 transcription factor                                                                            |
| 1,03 | UBE3A               | ubiquitin protein ligase E3A                                                                        |
| 1,03 | ZMIZ1               | Zhang2013 ALT_ACCEPTOR, ALT_DONOR, coding, INTERNAL, intronic best transcript NM_020338             |
| 1,03 | SCNM1;<br>TNFAIP8L2 | sodium channel modifier 1; tumor necrosis factor, alpha-induced protein 8-like 2                    |
| 1,03 | MAX                 | MYC associated factor X                                                                             |
| 1,03 | FUCA2               | fucosidase, alpha-L- 2, plasma                                                                      |
| 1,03 | PLK1                | polo-like kinase 1                                                                                  |
| 1,03 | NUAK1               | NUAK family, SNF1-like kinase, 1                                                                    |
| 1,03 | HMGB1               | high mobility group box 1                                                                           |
| 1,03 | DCLK2               | doublecortin-like kinase 2                                                                          |
| 1,03 | RECQL4              | RecQ helicase-like 4                                                                                |
| 1,03 | PTBP2               | polypyrimidine tract binding protein 2                                                              |
| 1,03 | EIF3B               | eukaryotic translation initiation factor 3, subunit B                                               |
| 1,03 | CXXC5               | Memczak2013 ANTISENSE, coding, INTERNAL, intronic best transcript NM_016463                         |
| 1,03 | SMNDC1              | survival motor neuron domain containing 1                                                           |
| 1,03 | LGALSL              | lectin, galactoside-binding-like                                                                    |
| 1,03 | MROH1               | maestro heat-like repeat family member 1                                                            |
| 1,03 | SPPL2B              | signal peptide peptidase like 2B                                                                    |
| 1,03 | ZAR1                | zygote arrest 1                                                                                     |
| 1,03 | TPBG                | trophoblast glycoprotein                                                                            |
| 1,03 | MMACHC              | methylmalonic aciduria (cobalamin deficiency) cblC type, with homocystinuria                        |
| 1,03 | OSBPL5              | oxysterol binding protein-like 5                                                                    |
| 1,03 | PRAMEF11            | PRAME family member 11                                                                              |
| 1,03 | ATF2                | activating transcription factor 2                                                                   |
| 1,03 | RGS19               | regulator of G-protein signaling 19                                                                 |
| 1,03 | SIK3                | SIK family kinase 3                                                                                 |
| 1,03 | POLR2C              | polymerase (RNA) II (DNA directed) polypeptide C, 33kDa                                             |
| 1,03 | PLCXD1              | phosphatidylinositol-specific phospholipase C, X domain containing 1                                |
| 1,03 | THRB                | thyroid hormone receptor, beta                                                                      |
| 1,03 | ZNF621              | zinc finger protein 621                                                                             |
| 1,03 | AMELX               | amelogenin, X-linked                                                                                |
| 1,03 | TAF9; AK6           | TAF9 RNA polymerase II, TATA box binding protein (TBP)-associated factor, 32kDa; adenylate kinase 6 |
| 1,03 | SLC7A6OS            | solute carrier family 7, member 6 opposite strand                                                   |
| 1,03 | IDH3A               | isocitrate dehydrogenase 3 (NAD+) alpha                                                             |
| 1,03 | CSAD                | cysteine sulfinic acid decarboxylase                                                                |

|      |               |                                                                                                                  |
|------|---------------|------------------------------------------------------------------------------------------------------------------|
| 1,03 | SRD5A1        | steroid-5-alpha-reductase, alpha polypeptide 1 (3-oxo-5 alpha-steroid delta 4-dehydrogenase alpha 1)             |
| 1,03 | ATF7IP        | activating transcription factor 7 interacting protein                                                            |
| 1,03 | GYG1          | glycogenin 1                                                                                                     |
| 1,03 | AIFM2         | Memczak2013 ANTISENSE, coding, INTERNAL, intronic best transcript NM_001198696                                   |
| 1,03 | TP53TG5       | TP53 target 5                                                                                                    |
| 1,03 | SEMA4D        | sema domain, immunoglobulin domain (Ig), transmembrane domain (TM) and short cytoplasmic domain, (semaphorin) 4D |
| 1,03 | DHRS4L1       | dehydrogenase/reductase (SDR family) member 4 like 1                                                             |
| 1,03 | PCBP3         | poly(rC) binding protein 3                                                                                       |
| 1,03 | C4orf17       | chromosome 4 open reading frame 17                                                                               |
| 1,03 | DPP4          | Transcript Identified by AceView, Entrez Gene ID(s) 1803                                                         |
| 1,03 | LAGE3         | L antigen family, member 3                                                                                       |
| 1,03 | NUP153        | nucleoporin 153kDa                                                                                               |
| 1,03 | ZNF300        | zinc finger protein 300                                                                                          |
| 1,03 | TCTN1         | tectonic family member 1                                                                                         |
| 1,03 | SLC7A6        | solute carrier family 7 (amino acid transporter light chain, y+L system), member 6                               |
| 1,03 | TMPRSS9       | transmembrane protease, serine 9                                                                                 |
| 1,03 | CDK19         | cyclin-dependent kinase 19                                                                                       |
| 1,03 | ALG2          | ALG2, alpha-1,3/1,6-mannosyltransferase                                                                          |
| 1,03 | PGK2          | phosphoglycerate kinase 2                                                                                        |
| 1,03 | PAX7          | paired box 7                                                                                                     |
| 1,03 | C14orf177     | chromosome 14 open reading frame 177                                                                             |
| 1,03 | HIST2H2BE     | histone cluster 2, H2be                                                                                          |
| 1,03 | C6orf141      | chromosome 6 open reading frame 141                                                                              |
| 1,03 | FOX L1        | forkhead box L1                                                                                                  |
| 1,03 | INTS10        | integrator complex subunit 10                                                                                    |
| 1,03 | PDLIM5        | PDZ and LIM domain 5                                                                                             |
| 1,03 | VWA9          | von Willebrand factor A domain containing 9                                                                      |
| 1,03 | FLNA          | Memczak2013 ANTISENSE, CDS, coding, INTERNAL best transcript NM_001456                                           |
| 1,03 | TGFBR2        | transforming growth factor beta receptor II                                                                      |
| 1,03 | SCP2          | Jeck2013 ANTISENSE, coding, INTERNAL, OVEXON, UTR3 best transcript NM_001007098                                  |
| 1,03 | MEI1          | Salzman2013 ALT_ACCEPTOR, ALT_DONOR, coding, INTERNAL, intronic best transcript NM_152513                        |
| 1,03 | DGAT2L6       | diacylglycerol O-acyltransferase 2-like 6                                                                        |
| 1,03 | CTIF; MIR4743 | CBP80/20-dependent translation initiation factor; microRNA 4743                                                  |
| 1,03 | TJP1          | Transcript Identified by AceView, Entrez Gene ID(s) 7082                                                         |
| 1,03 | AK7           | adenylate kinase 7                                                                                               |
| 1,03 | AP2B1         | adaptor-related protein complex 2, beta 1 subunit                                                                |
| 1,03 | YWHAZ         | tyrosine 3-monooxygenase/tryptophan 5-monooxygenase activation protein, zeta                                     |

|      |                           |                                                                                                                 |
|------|---------------------------|-----------------------------------------------------------------------------------------------------------------|
| 1,03 | CCND2                     | cyclin D2                                                                                                       |
| 1,03 | CLDN23                    | claudin 23                                                                                                      |
| 1,03 | NAPEPLD                   | N-acyl phosphatidylethanolamine phospholipase D                                                                 |
| 1,03 | SAMD4A                    | sterile alpha motif domain containing 4A                                                                        |
| 1,03 | CHST10                    | carbohydrate sulfotransferase 10                                                                                |
| 1,03 | NAPG                      | N-ethylmaleimide-sensitive factor attachment protein, gamma                                                     |
| 1,03 | GBA3                      | Jeck2013 ANTISENSE, coding, INTERNAL, intronic best transcript NM_020973                                        |
| 1,03 | WNT10A                    | wingless-type MMTV integration site family, member 10A                                                          |
| 1,03 | CCDC84                    | coiled-coil domain containing 84                                                                                |
| 1,03 | LGII                      | leucine-rich, glioma inactivated 1                                                                              |
| 1,03 | C7orf50                   | chromosome 7 open reading frame 50                                                                              |
| 1,03 | OR7A10                    | olfactory receptor, family 7, subfamily A, member 10                                                            |
| 1,03 | UQCRH                     | ubiquinol-cytochrome c reductase hinge protein                                                                  |
| 1,03 | RRAS2                     | related RAS viral (r-ras) oncogene homolog 2                                                                    |
| 1,03 | DDX5; MIR3064; MIR5047    | DEAD (Asp-Glu-Ala-Asp) box helicase 5; microRNA 3064; microRNA 5047                                             |
| 1,03 | POLR1D                    | polymerase (RNA) I polypeptide D                                                                                |
| 1,03 | AP3M1                     | adaptor-related protein complex 3, mu 1 subunit                                                                 |
| 1,03 | SOX17                     | SRY box 17                                                                                                      |
| 1,03 | ISCU                      | iron-sulfur cluster assembly enzyme                                                                             |
| 1,03 | ITIH3                     | inter-alpha-trypsin inhibitor heavy chain 3                                                                     |
| 1,03 | MAP9                      | microtubule-associated protein 9                                                                                |
| 1,03 | PTPRQ                     | protein tyrosine phosphatase, receptor type, Q                                                                  |
| 1,03 | ERCC6; ERCC6-PGBD3; PGBD3 | excision repair cross-complementation group 6; ERCC6-PGBD3 readthrough; piggyBac transposable element derived 3 |
| 1,03 | TBC1D3K                   | TBC1 domain family, member 3K                                                                                   |
| 1,03 | EPS8L2                    | EPS8-like 2                                                                                                     |
| 1,03 | CDKN2AIP                  | CDKN2A interacting protein                                                                                      |
| 1,03 | SLC2A11                   | solute carrier family 2 (facilitated glucose transporter), member 11                                            |
| 1,03 | ATF5; MIR4751             | activating transcription factor 5; microRNA 4751                                                                |
| 1,03 | BANK1                     | B-cell scaffold protein with ankyrin repeats 1                                                                  |
| 1,03 | HHLA1                     | HERV-H LTR-associating 1                                                                                        |
| 1,03 | NRAS                      | neuroblastoma RAS viral (v-ras) oncogene homolog                                                                |
| 1,03 | RAB3B                     | RAB3B, member RAS oncogene family                                                                               |
| 1,03 | GALK2                     | galactokinase 2                                                                                                 |
| 1,03 | CNIH3                     | cornichon family AMPA receptor auxiliary protein 3                                                              |
| 1,03 | ABLIM1                    | actin binding LIM protein 1                                                                                     |
| 1,03 | TROVE2                    | TROVE domain family, member 2                                                                                   |
| 1,03 | SCX                       | scleraxis bHLH transcription factor                                                                             |
| 1,03 | PDHA2                     | pyruvate dehydrogenase (lipoamide) alpha 2                                                                      |
| 1,03 | TNRC6B                    | Transcript Identified by AceView, Entrez Gene ID(s) 23112                                                       |
| 1,03 | COL1A2                    | Jeck2013 ANTISENSE, CDS, coding, INTERNAL, intronic, OVCODE, OVEXON best transcript NM_000089                   |

|      |                    |                                                                |
|------|--------------------|----------------------------------------------------------------|
| 1,03 | SLC22A8            | solute carrier family 22 (organic anion transporter), member 8 |
| 1,03 | CDK16              | cyclin-dependent kinase 16                                     |
| 1,03 | VAMP3              | vesicle associated membrane protein 3                          |
| 1,03 | FAM110C            | family with sequence similarity 110, member C                  |
| 1,03 | TNP2               | transition protein 2 (during histone to protamine replacement) |
| 1,03 | OR2M4              | olfactory receptor, family 2, subfamily M, member 4            |
| 1,03 | WNT3               | wingless-type MMTV integration site family, member 3           |
| 1,03 | C11orf65           | chromosome 11 open reading frame 65                            |
| 1,03 | HEATR6             | HEAT repeat containing 6                                       |
| 1,03 | MICU2              | mitochondrial calcium uptake 2                                 |
| 1,03 | CYP11B1            | cytochrome P450, family 11, subfamily B, polypeptide 1         |
| 1,03 | HSPA14             | heat shock 70kDa protein 14                                    |
| 1,03 | C3orf36            | chromosome 3 open reading frame 36                             |
| 1,03 | PRDX1              | peroxiredoxin 1                                                |
| 1,03 | CCDC94             | coiled-coil domain containing 94                               |
| 1,03 | MDH1               | malate dehydrogenase 1                                         |
| 1,03 | BHLHE41            | basic helix-loop-helix family, member e41                      |
| 1,03 | DGAT1;<br>MIR6848  | diacylglycerol O-acyltransferase 1; microRNA 6848              |
| 1,03 | HLF                | hepatic leukemia factor                                        |
| 1,03 | XPO5               | exportin 5                                                     |
| 1,03 | MIR1247            | microRNA 1247                                                  |
| 1,03 | PTP4A2             | protein tyrosine phosphatase type IVA, member 2                |
| 1,03 | CACNB3             | calcium channel, voltage-dependent, beta 3 subunit             |
| 1,03 | TFPI2              | tissue factor pathway inhibitor 2                              |
| 1,03 | SIT1               | signaling threshold regulating transmembrane adaptor 1         |
| 1,03 | ITSN1              | Transcript Identified by AceView, Entrez Gene ID(s) 6453       |
| 1,03 | LHX4-AS1;<br>ACBD6 | LHX4 antisense RNA 1; acyl-CoA binding domain containing 6     |
| 1,03 | ILDR2              | immunoglobulin-like domain containing receptor 2               |
| 1,03 | MC5R               | melanocortin 5 receptor                                        |
| 1,03 | GPR27              | G protein-coupled receptor 27                                  |
| 1,03 | MPV17L2            | MPV17 mitochondrial membrane protein-like 2                    |
| 1,03 | MFSD9              | major facilitator superfamily domain containing 9              |
| 1,03 | PXT1               | peroxisomal, testis specific 1                                 |
| 1,03 | MTBP               | MDM2 binding protein                                           |
| 1,03 | C8orf88            | chromosome 8 open reading frame 88                             |
| 1,03 | MED20              | mediator complex subunit 20                                    |
| 1,03 | DCAF4              | DDB1 and CUL4 associated factor 4                              |
| 1,03 | BOLA3              | bolA family member 3                                           |
| 1,03 | RCAN3              | RCAN family member 3                                           |
| 1,03 | IMPDH1             | IMP (inosine 5-monophosphate) dehydrogenase 1                  |
| 1,03 | LSM1               | LSM1 homolog, mRNA degradation associated                      |
| 1,03 | ARL5A              | ADP-ribosylation factor like GTPase 5A                         |

|      |              |                                                                                                     |
|------|--------------|-----------------------------------------------------------------------------------------------------|
| 1,03 | QRICH1       | glutamine-rich 1                                                                                    |
| 1,03 | DCAKD        | dephospho-CoA kinase domain containing                                                              |
| 1,03 | LRRC52       | leucine rich repeat containing 52                                                                   |
| 1,03 | ARAP2        | ArfGAP with RhoGAP domain, ankyrin repeat and PH domain 2                                           |
| 1,03 | FOXL2NB      | FOXL2 neighbor                                                                                      |
| 1,03 | ZNF493       | zinc finger protein 493                                                                             |
| 1,03 | PM20D1       | peptidase M20 domain containing 1                                                                   |
| 1,03 | DAAM1        | dishevelled associated activator of morphogenesis 1                                                 |
| 1,03 | IL23R        | interleukin 23 receptor                                                                             |
| 1,03 | ANKRD20A1    | ankyrin repeat domain 20 family, member A1                                                          |
| 1,03 | TAF4         | TAF4 RNA polymerase II, TATA box binding protein (TBP)-associated factor, 135kDa                    |
| 1,03 | ZNF672       | zinc finger protein 672                                                                             |
| 1,03 | DUSP4        | dual specificity phosphatase 4                                                                      |
| 1,03 | UAP1L1       | UDP-N-acetylglucosamine pyrophosphorylase 1 like 1                                                  |
| 1,03 | TEX37        | testis expressed 37                                                                                 |
| 1,03 | DENND1A      | DENN/MADD domain containing 1A                                                                      |
| 1,03 | WDR45B       | WD repeat domain 45B                                                                                |
| 1,03 | GPR89B       | G protein-coupled receptor 89B                                                                      |
| 1,03 | APOOL        | apolipoprotein O-like                                                                               |
| 1,03 | IL22RA2      | interleukin 22 receptor, alpha 2                                                                    |
| 1,03 | HMBS         | hydroxymethylbilane synthase                                                                        |
| 1,03 | AGBL5        | ATP/GTP binding protein-like 5                                                                      |
| 1,03 | SNX7         | sorting nexin 7                                                                                     |
| 1,03 | PURA         | purine-rich element binding protein A                                                               |
| 1,03 | TMEM60       | transmembrane protein 60                                                                            |
| 1,03 | MCFD2        | multiple coagulation factor deficiency 2                                                            |
| 1,03 | TM2D1        | TM2 domain containing 1                                                                             |
| 1,03 | CD44         | CD44 molecule (Indian blood group)                                                                  |
| 1,03 | PTRHD1       | peptidyl-tRNA hydrolase domain containing 1                                                         |
| 1,03 | CCNC         | cyclin C                                                                                            |
| 1,03 | ZNF616       | zinc finger protein 616                                                                             |
| 1,03 | RPL7         | ribosomal protein L7                                                                                |
| 1,03 | HIRIP3       | HIRA interacting protein 3                                                                          |
| 1,03 | MVD          | mevalonate (diphospho) decarboxylase                                                                |
| 1,03 | TMEM11       | transmembrane protein 11                                                                            |
| 1,03 | SCFD1        | sec1 family domain containing 1                                                                     |
| 1,03 | PTPRA; VPS16 | protein tyrosine phosphatase, receptor type, A; vacuolar protein sorting 16 homolog (S. cerevisiae) |
| 1,03 | FAM168B      | family with sequence similarity 168, member B                                                       |
| 1,03 | PRDM15       | PR domain containing 15                                                                             |
| 1,03 | LRRK2        | leucine-rich repeat kinase 2                                                                        |
| 1,03 | RYR2         | ryanodine receptor 2 (cardiac)                                                                      |
| 1,03 | KIAA0930     | KIAA0930                                                                                            |
| 1,03 | PSEN1        | presenilin 1                                                                                        |
| 1,03 | MAP10        | microtubule-associated protein 10                                                                   |
| 1,03 | IKZF5        | IKAROS family zinc finger 5                                                                         |
| 1,03 | ATL2         | atlastin GTPase 2                                                                                   |

|      |                           |                                                                                                                                    |
|------|---------------------------|------------------------------------------------------------------------------------------------------------------------------------|
| 1,03 | DNAH14                    | dynein, axonemal, heavy chain 14                                                                                                   |
| 1,03 | FGGY                      | FGGY carbohydrate kinase domain containing                                                                                         |
| 1,03 | COX6A2                    | cytochrome c oxidase subunit VIa polypeptide 2                                                                                     |
| 1,03 | NCAPD3                    | non-SMC condensin II complex subunit D3                                                                                            |
| 1,03 | LOC286238;<br>RP13-60M5.2 | uncharacterized LOC286238; Transcript Identified by AceView, Entrez Gene ID(s) 286238, RefSeq ID(s) NM_001100111; novel transcript |
| 1,03 | GRPR                      | gastrin-releasing peptide receptor                                                                                                 |
| 1,03 | INTS1                     | Memczak2013 ANTISENSE, CDS, coding, INTERNAL best transcript NM_001080453                                                          |
| 1,03 | OR5P2                     | olfactory receptor, family 5, subfamily P, member 2                                                                                |
| 1,03 | ZNF662                    | zinc finger protein 662                                                                                                            |
| 1,03 | STC2                      | stanniocalcin 2                                                                                                                    |
| 1,03 | HNRNPDL                   | heterogeneous nuclear ribonucleoprotein D like                                                                                     |
| 1,03 | RAB3A                     | RAB3A, member RAS oncogene family                                                                                                  |
| 1,03 | OPN1SW                    | opsin 1 (cone pigments), short-wave-sensitive                                                                                      |
| 1,03 | SLC51B                    | solute carrier family 51, beta subunit                                                                                             |
| 1,03 | GORASP2                   | golgi reassembly stacking protein 2                                                                                                |
| 1,03 | RNF212B                   | ring finger protein 212B                                                                                                           |
| 1,03 | CERS1; GDF1               | ceramide synthase 1; growth differentiation factor 1                                                                               |
| 1,03 | GTF3C2                    | general transcription factor IIIC subunit 2                                                                                        |
| 1,03 | SLC2A2                    | solute carrier family 2 (facilitated glucose transporter), member 2                                                                |
| 1,03 | RTN4                      | reticulon 4                                                                                                                        |
| 1,03 | MAGEE2                    | MAGE family member E2                                                                                                              |
| 1,03 | PKIG                      | protein kinase (cAMP-dependent, catalytic) inhibitor gamma                                                                         |
| 1,03 | NCOR1                     | nuclear receptor corepressor 1                                                                                                     |
| 1,03 | MRPL30                    | mitochondrial ribosomal protein L30                                                                                                |
| 1,03 | KDM4D                     | lysine (K)-specific demethylase 4D                                                                                                 |
| 1,03 | COLGALT1                  | collagen beta(1-O)galactosyltransferase 1                                                                                          |
| 1,03 | SLCO3A1                   | solute carrier organic anion transporter family, member 3A1                                                                        |
| 1,03 | SCG5                      | secretogranin V                                                                                                                    |
| 1,03 | KDM1A                     | Transcript Identified by AceView, Entrez Gene ID(s) 23028                                                                          |
| 1,03 | FBXL18                    | F-box and leucine-rich repeat protein 18                                                                                           |
| 1,03 | BMPER                     | BMP binding endothelial regulator                                                                                                  |
| 1,03 | IGF2BP2                   | insulin-like growth factor 2 mRNA binding protein 2                                                                                |
| 1,03 | GNPDA2                    | glucosamine-6-phosphate deaminase 2                                                                                                |
| 1,03 | SHISA7                    | shisa family member 7                                                                                                              |
| 1,03 | GABRB1                    | gamma-aminobutyric acid (GABA) A receptor, beta 1                                                                                  |
| 1,03 | UBE4B                     | ubiquitination factor E4B                                                                                                          |
| 1,03 | PEA15                     | phosphoprotein enriched in astrocytes 15                                                                                           |
| 1,03 | HS6ST1                    | heparan sulfate 6-O-sulfotransferase 1                                                                                             |
| 1,03 | TBC1D27                   | TBC1 domain family, member 27                                                                                                      |
| 1,03 | ANKRD28                   | ankyrin repeat domain 28                                                                                                           |
| 1,03 | ZFC3H1                    | zinc finger, C3H1-type containing                                                                                                  |
| 1,03 | EDEM2                     | ER degradation enhancer, mannosidase alpha-like 2                                                                                  |

|      |                             |                                                                                                 |
|------|-----------------------------|-------------------------------------------------------------------------------------------------|
| 1,03 | IRAK1BP1                    | interleukin 1 receptor associated kinase 1 binding protein 1                                    |
| 1,03 | KCNQ4                       | potassium channel, voltage gated KQT-like subfamily Q, member 4                                 |
| 1,03 | ARCN1                       | archain 1                                                                                       |
| 1,03 | OR9A4                       | olfactory receptor, family 9, subfamily A, member 4                                             |
| 1,03 | KLK9                        | kallikrein related peptidase 9                                                                  |
| 1,03 | KIAA1524                    | KIAA1524                                                                                        |
| 1,03 | MAB21L1                     | mab-21-like 1 (C. elegans)                                                                      |
| 1,03 | TEX15                       | testis expressed 15                                                                             |
| 1,03 | LOC441178;<br>RP11-351J23.1 | uncharacterized LOC441178; novel tanscript                                                      |
| 1,03 | ZNF24                       | zinc finger protein 24                                                                          |
| 1,03 | ZNF320                      | zinc finger protein 320                                                                         |
| 1,03 | DIRAS2                      | DIRAS family, GTP-binding RAS-like 2                                                            |
| 1,03 | NPIPA8                      | nuclear pore complex interacting protein family, member A8                                      |
| 1,03 | EXT2                        | exostosin glycosyltransferase 2                                                                 |
| 1,03 | ID3                         | inhibitor of DNA binding 3, dominant negative helix-loop-helix protein                          |
| 1,03 | NFE2L1                      | nuclear factor, erythroid 2-like 1                                                              |
| 1,03 | OR10G8                      | olfactory receptor, family 10, subfamily G, member 8                                            |
| 1,03 | FBXW2                       | F-box and WD repeat domain containing 2                                                         |
| 1,03 | MLLT11                      | myeloid/lymphoid or mixed-lineage leukemia; translocated to, 11                                 |
| 1,03 | NSUN5P2;<br>NSUN5P1         | NOP2/Sun domain family, member 5 pseudogene 2;<br>NOP2/Sun domain family, member 5 pseudogene 1 |
| 1,03 | SCIMP                       | SLP adaptor and CSK interacting membrane protein                                                |
| 1,03 | ELF3                        | E74-like factor 3 (ets domain transcription factor, epithelial-specific )                       |
| 1,03 | SHC4                        | SHC (Src homology 2 domain containing) family, member 4                                         |
| 1,03 | MAGEB3                      | Transcript Identified by AceView, Entrez Gene ID(s) 4114                                        |
| 1,03 | SFI1                        | SFI1 centrin binding protein                                                                    |
| 1,03 | FGFBP1                      | fibroblast growth factor binding protein 1                                                      |
| 1,03 | VPS4B                       | vacuolar protein sorting 4 homolog B (S. cerevisiae)                                            |
| 1,03 | SAR1B                       | Transcript Identified by AceView, Entrez Gene ID(s) 51128                                       |
| 1,03 | C8orf4                      | chromosome 8 open reading frame 4                                                               |
| 1,03 | TCP10L2                     | t-complex 10-like 2                                                                             |
| 1,03 | TM9SF2                      | transmembrane 9 superfamily member 2                                                            |
| 1,03 | IFNGR2                      | interferon gamma receptor 2 (interferon gamma transducer 1)                                     |
| 1,03 | FAM179A                     | family with sequence similarity 179, member A                                                   |
| 1,03 | PRRG3                       | proline rich Gla (G-carboxyglutamic acid) 3 (transmembrane)                                     |
| 1,03 | ITPKC                       | Transcript Identified by AceView, Entrez Gene ID(s) 80271                                       |
| 1,03 | FERMT1                      | fermitin family member 1                                                                        |

|      |          |                                                                                           |
|------|----------|-------------------------------------------------------------------------------------------|
| 1,03 | SNRNP27  | small nuclear ribonucleoprotein, U4/U6.U5 27kDa subunit                                   |
| 1,03 | RPS6KA1  | ribosomal protein S6 kinase, 90kDa, polypeptide 1                                         |
| 1,03 | SAMD5    | sterile alpha motif domain containing 5                                                   |
| 1,03 | AVEN     | apoptosis, caspase activation inhibitor                                                   |
| 1,03 | SURF6    | surfeit 6                                                                                 |
| 1,03 | FGF21    | fibroblast growth factor 21                                                               |
| 1,03 | PRAMEF19 | PRAME family member 19<br>[Source:EntrezGene;Acc:645414]                                  |
| 1,03 | PGAM4    | phosphoglycerate mutase family member 4                                                   |
| 1,03 | DLL3     | delta-like 3 (Drosophila)                                                                 |
| 1,03 | HMMR     | hyaluronan-mediated motility receptor (RHAMM)                                             |
| 1,03 | ADRA2C   | adrenoceptor alpha 2C                                                                     |
| 1,03 | METTL16  | methyltransferase like 16                                                                 |
| 1,03 | STAT5A   | signal transducer and activator of transcription 5A                                       |
| 1,03 | MND1     | meiotic nuclear divisions 1                                                               |
| 1,03 | SRFBP1   | serum response factor binding protein 1                                                   |
| 1,03 | NENF     | neudesin neurotrophic factor                                                              |
| 1,03 | PDP2     | pyruvate dehydrogenase phosphatase catalytic subunit 2                                    |
| 1,03 | RUVBL2   | RuvB-like AAA ATPase 2                                                                    |
| 1,03 | PCDHB9   | protocadherin beta 9                                                                      |
| 1,03 | ISM1     | isthmin 1, angiogenesis inhibitor                                                         |
| 1,03 | EIF3K    | eukaryotic translation initiation factor 3, subunit K                                     |
| 1,03 | CFAP161  | cilia and flagella associated protein 161                                                 |
| 1,03 | SLC30A5  | solute carrier family 30 (zinc transporter), member 5                                     |
| 1,03 | CTNNB1   | catenin, beta like 1                                                                      |
| 1,03 | KCNJ11   | potassium channel, inwardly rectifying subfamily J, member 11                             |
| 1,03 | CMPK1    | cytidine monophosphate (UMP-CMP) kinase 1, cytosolic                                      |
| 1,03 | INSM2    | insulinoma-associated 2                                                                   |
| 1,03 | EXTL2    | exostosin-like glycosyltransferase 2                                                      |
| 1,03 | KRTAP4-7 | keratin associated protein 4-7                                                            |
| 1,03 | TRPT1    | tRNA phosphotransferase 1                                                                 |
| 1,03 | CRKL     | v-crk avian sarcoma virus CT10 oncogene homolog-like                                      |
| 1,03 | UBXN1    | UBX domain protein 1                                                                      |
| 1,03 | BRX1     | BRX1, biogenesis of ribosomes                                                             |
| 1,03 | PSMA3    | proteasome subunit alpha 3                                                                |
| 1,03 | ERLIN1   | ER lipid raft associated 1                                                                |
| 1,03 | SASH3    | SAM and SH3 domain containing 3                                                           |
| 1,03 | DLST     | dihydrolipoamide S-succinyltransferase (E2 component of 2-oxo-glutarate complex)          |
| 1,03 | HAS1     | hyaluronan synthase 1                                                                     |
| 1,03 | PHACTR2  | Jeck2013 ALT_ACCEPTOR, ALT_DONOR, coding, INTERNAL, intronic best transcript NM_001100164 |
| 1,03 | U2AF2    | U2 small nuclear RNA auxiliary factor 2                                                   |
| 1,03 | PITX3    | paired-like homeodomain 3                                                                 |

|      |                       |                                                                                                                                                                                                                                    |
|------|-----------------------|------------------------------------------------------------------------------------------------------------------------------------------------------------------------------------------------------------------------------------|
| 1,03 | MAPK1IP1L             | mitogen-activated protein kinase 1 interacting protein 1-like                                                                                                                                                                      |
| 1,03 | EGR2                  | early growth response 2                                                                                                                                                                                                            |
| 1,03 | CRLF2                 | cytokine receptor-like factor 2                                                                                                                                                                                                    |
| 1,03 | FKBP1A-SDCBP2         | FKBP1A-SDCBP2 readthrough (NMD candidate)                                                                                                                                                                                          |
| 1,03 | sep-11                | septin 11                                                                                                                                                                                                                          |
| 1,03 | SRSF1                 | serine/arginine-rich splicing factor 1                                                                                                                                                                                             |
| 1,03 | ITGA7                 | integrin alpha 7                                                                                                                                                                                                                   |
| 1,03 | OR5D13                | olfactory receptor, family 5, subfamily D, member 13 (gene/pseudogene)                                                                                                                                                             |
| 1,03 | TMEM178A              | transmembrane protein 178A                                                                                                                                                                                                         |
| 1,03 | ASGR2                 | asialoglycoprotein receptor 2                                                                                                                                                                                                      |
| 1,03 | GNAS                  | GNAS complex locus                                                                                                                                                                                                                 |
| 1,03 | LGALS17A              | Charcot-Leyden crystal protein pseudogene                                                                                                                                                                                          |
| 1,03 | MMP15                 | matrix metalloproteinase 15 (membrane-inserted)                                                                                                                                                                                    |
| 1,03 | TDRD12                | tudor domain containing 12                                                                                                                                                                                                         |
| 1,03 | SOS2                  | SOS Ras/Rho guanine nucleotide exchange factor 2                                                                                                                                                                                   |
| 1,03 | FAM156A               | family with sequence similarity 156, member A                                                                                                                                                                                      |
| 1,03 | RPL19                 | ribosomal protein L19                                                                                                                                                                                                              |
| 1,03 | RXRB                  | retinoid X receptor beta                                                                                                                                                                                                           |
| 1,03 | ATP5J                 | ATP synthase, H <sup>+</sup> transporting, mitochondrial Fo complex subunit F6                                                                                                                                                     |
| 1,03 | ERAL1                 | Era-like 12S mitochondrial rRNA chaperone 1                                                                                                                                                                                        |
| 1,03 | C10orf99              | chromosome 10 open reading frame 99                                                                                                                                                                                                |
| 1,03 | SPIN3                 | spindlin family, member 3                                                                                                                                                                                                          |
| 1,03 | NLRC4                 | NLR family, CARD domain containing 4                                                                                                                                                                                               |
| 1,03 | INPP5D                | inositol polyphosphate-5-phosphatase D                                                                                                                                                                                             |
| 1,03 | OR8B3                 | olfactory receptor, family 8, subfamily B, member 3                                                                                                                                                                                |
| 1,03 | RPL26                 | ribosomal protein L26                                                                                                                                                                                                              |
| 1,03 | UBE2L3                | ubiquitin conjugating enzyme E2L 3                                                                                                                                                                                                 |
| 1,03 | SIM2                  | single-minded family bHLH transcription factor 2                                                                                                                                                                                   |
| 1,03 | ASUN                  | asunder spermatogenesis regulator                                                                                                                                                                                                  |
| 1,03 | RP11-362J17.1; PACRGL | novel transcript, antisense to KCNIP4; Transcript Identified by AceView, Entrez Gene ID(s) 133015                                                                                                                                  |
| 1,03 | LZTS3; ProSAPiP1      | leucine zipper, putative tumor suppressor family member 3; Leucine zipper putative tumor suppressor 3 [Source:UniProtKB/Swiss-Prot;Acc:O60299]; Salzman2013 ANNOTATED, CDS, coding, OVCODE, OVEXON, UTR5 best transcript NM_014731 |
| 1,03 | GPNMB                 | glycoprotein (transmembrane) nmb                                                                                                                                                                                                   |
| 1,03 | ZNF69                 | zinc finger protein 69                                                                                                                                                                                                             |
| 1,03 | MRE11A                | MRE11 homolog A, double strand break repair nuclease                                                                                                                                                                               |
| 1,03 | HERPUD2               | HERPUD family member 2                                                                                                                                                                                                             |
| 1,03 | CD40                  | CD40 molecule, TNF receptor superfamily member 5                                                                                                                                                                                   |
| 1,03 | SLC16A7               | solute carrier family 16 (monocarboxylate transporter), member 7                                                                                                                                                                   |
| 1,03 | TSGA10                | testis specific 10                                                                                                                                                                                                                 |

|      |                                          |                                                                                                                                                                        |
|------|------------------------------------------|------------------------------------------------------------------------------------------------------------------------------------------------------------------------|
| 1,03 | SAG                                      | S-antigen; retina and pineal gland (arrestin)                                                                                                                          |
| 1,03 | ZC3H15                                   | zinc finger CCCH-type containing 15                                                                                                                                    |
| 1,02 | ALG10B                                   | ALG10B, alpha-1,2-glucosyltransferase                                                                                                                                  |
| 1,02 | DBF4                                     | DBF4 zinc finger                                                                                                                                                       |
| 1,02 | ZFP14                                    | ZFP14 zinc finger protein                                                                                                                                              |
| 1,02 | PANX1                                    | pannexin 1                                                                                                                                                             |
| 1,02 | NEURL2                                   | neuralized E3 ubiquitin protein ligase 2                                                                                                                               |
| 1,02 | RPL6                                     | ribosomal protein L6                                                                                                                                                   |
| 1,02 | TSGA10IP                                 | testis specific 10 interacting protein                                                                                                                                 |
| 1,02 | GOLGA8G                                  | golgin A8 family, member G                                                                                                                                             |
| 1,02 | L3MBTL1                                  | l(3)mbt-like 1 (Drosophila)                                                                                                                                            |
| 1,02 | KRI1                                     | KRI1 homolog                                                                                                                                                           |
| 1,02 | PARK2                                    | parkin RBR E3 ubiquitin protein ligase                                                                                                                                 |
| 1,02 | CNGA2                                    | cyclic nucleotide gated channel alpha 2                                                                                                                                |
| 1,02 | PDHA1                                    | pyruvate dehydrogenase (lipoamide) alpha 1                                                                                                                             |
| 1,02 | NT5C1B;<br>NT5C1B-RDH14;<br>RDH14        | 5-nucleotidase, cytosolic IB; NT5C1B-RDH14 readthrough; retinol dehydrogenase 14 (all-trans/9-cis/11-cis)                                                              |
| 1,02 | RPP38                                    | ribonuclease P/MRP 38kDa subunit                                                                                                                                       |
| 1,02 | TOMM20L                                  | translocase of outer mitochondrial membrane 20 homolog (yeast)-like                                                                                                    |
| 1,02 | SDCBP                                    | syndecan binding protein                                                                                                                                               |
| 1,02 | PRSS33                                   | protease, serine, 33                                                                                                                                                   |
| 1,02 | HIST2H2AA4;<br>HIST2H2AA3                | histone cluster 2, H2aa4; histone cluster 2, H2aa3                                                                                                                     |
| 1,02 | C20orf78                                 | chromosome 20 open reading frame 78                                                                                                                                    |
| 1,02 | CAPG                                     | capping protein (actin filament), gelsolin-like                                                                                                                        |
| 1,02 | PIAS2                                    | protein inhibitor of activated STAT 2                                                                                                                                  |
| 1,02 | ZNF502                                   | zinc finger protein 502                                                                                                                                                |
| 1,02 | CARTPT                                   | CART prepropeptide                                                                                                                                                     |
| 1,02 | PRG3                                     | proteoglycan 3                                                                                                                                                         |
| 1,02 | LOC388242;<br>LOC613038;<br>RP11-345J4.3 | SAGA complex associated factor 29 pseudogene; Transcript Identified by AceView, Entrez Gene ID(s) 388242; Uncharacterized protein [Source:UniProtKB/TrEMBL;Acc:H0YHM3] |
| 1,02 | ITGB7                                    | integrin beta 7                                                                                                                                                        |
| 1,02 | RHOU                                     | ras homolog family member U                                                                                                                                            |
| 1,02 | TRIM2                                    | tripartite motif containing 2                                                                                                                                          |
| 1,02 | XKR4                                     | X-linked Kx blood group related 4                                                                                                                                      |
| 1,02 | RNF122                                   | ring finger protein 122                                                                                                                                                |
| 1,02 | WNK1                                     | Transcript Identified by AceView, Entrez Gene ID(s) 378465; 65125                                                                                                      |
| 1,02 | KAT7                                     | K(lysine) acetyltransferase 7                                                                                                                                          |
| 1,02 | ZNF814                                   | zinc finger protein 814                                                                                                                                                |
| 1,02 | KSR2                                     | kinase suppressor of ras 2                                                                                                                                             |
| 1,02 | POMP                                     | proteasome maturation protein                                                                                                                                          |
| 1,02 | AIRE                                     | autoimmune regulator                                                                                                                                                   |
| 1,02 | ZNF418                                   | zinc finger protein 418                                                                                                                                                |
| 1,02 | COMMD1                                   | copper metabolism (Murr1) domain containing 1                                                                                                                          |
| 1,02 | FAXDC2                                   | fatty acid hydroxylase domain containing 2                                                                                                                             |

|      |                                           |                                                                                                                                                               |
|------|-------------------------------------------|---------------------------------------------------------------------------------------------------------------------------------------------------------------|
| 1,02 | LOC339862;<br>RP11-320G10.1;<br>skerdorbo | uncharacterized LOC339862; novel transcript;<br>Transcript Identified by AceView                                                                              |
| 1,02 | NDUFC2-<br>KCTD14;<br>NDUFC2;<br>KCTD14   | NDUFC2-KCTD14 readthrough; NADH<br>dehydrogenase (ubiquinone) 1, subcomplex unknown,<br>2, 14.5kDa; potassium channel tetramerization domain<br>containing 14 |
| 1,02 | RIOK1                                     | RIO kinase 1                                                                                                                                                  |
| 1,02 | SURF6                                     | surfeit 6                                                                                                                                                     |
| 1,02 | CEP55                                     | centrosomal protein 55kDa                                                                                                                                     |
| 1,02 | ZNF80                                     | zinc finger protein 80                                                                                                                                        |
| 1,02 | PAPOLA                                    | poly(A) polymerase alpha                                                                                                                                      |
| 1,02 | SLC44A1                                   | solute carrier family 44 (choline transporter), member 1                                                                                                      |
| 1,02 | COLGALT2                                  | collagen beta(1-O)galactosyltransferase 2                                                                                                                     |
| 1,02 | TXN                                       | thioredoxin                                                                                                                                                   |
| 1,02 | RBFA; RBFADN                              | ribosome binding factor A (putative); RBFA<br>downstream neighbor (non-protein coding)                                                                        |
| 1,02 | PACSIN2                                   | protein kinase C and casein kinase substrate in neurons<br>2                                                                                                  |
| 1,02 | HOGA1                                     | 4-hydroxy-2-oxoglutarate aldolase 1                                                                                                                           |
| 1,02 | ZNF784                                    | zinc finger protein 784                                                                                                                                       |
| 1,02 | RPAIN                                     | RPA interacting protein                                                                                                                                       |
| 1,02 | SAE1                                      | SUMO1 activating enzyme subunit 1                                                                                                                             |
| 1,02 | PRR14                                     | proline rich 14                                                                                                                                               |
| 1,02 | ZDHHC14                                   | zinc finger, DHHC-type containing 14                                                                                                                          |
| 1,02 | PPP1R8                                    | protein phosphatase 1, regulatory subunit 8                                                                                                                   |
| 1,02 | ZFYVE28                                   | zinc finger, FYVE domain containing 28                                                                                                                        |
| 1,02 | ASCC2                                     | activating signal cointegrator 1 complex subunit 2                                                                                                            |
| 1,02 | NDEL1                                     | nudE neurodevelopment protein 1-like 1                                                                                                                        |
| 1,02 | OR5AK2                                    | olfactory receptor, family 5, subfamily AK, member 2                                                                                                          |
| 1,02 | MT3                                       | metallothionein 3                                                                                                                                             |
| 1,02 | CHST9                                     | carbohydrate (N-acetylgalactosamine 4-O)<br>sulfotransferase 9                                                                                                |
| 1,02 | UPF3A                                     | UPF3 regulator of nonsense transcripts homolog A<br>(yeast)                                                                                                   |
| 1,02 | MANEAL                                    | mannosidase, endo-alpha-like                                                                                                                                  |
| 1,02 | PDZD7                                     | PDZ domain containing 7                                                                                                                                       |
| 1,02 | FYN                                       | FYN proto-oncogene, Src family tyrosine kinase                                                                                                                |
| 1,02 | CSAG3                                     | CSAG family, member 3                                                                                                                                         |
| 1,02 | ASCL4                                     | achaete-scute family bHLH transcription factor 4                                                                                                              |
| 1,02 | RPS27                                     | ribosomal protein S27                                                                                                                                         |
| 1,02 | MDH1B                                     | malate dehydrogenase 1B                                                                                                                                       |
| 1,02 | ARHGAP33                                  | Rho GTPase activating protein 33                                                                                                                              |
| 1,02 | ARV1                                      | ARV1 homolog, fatty acid homeostasis modulator                                                                                                                |
| 1,02 | SLX1A-<br>SULT1A3                         | SLX1A-SULT1A3 readthrough (NMD candidate)                                                                                                                     |
| 1,02 | DENR                                      | density-regulated protein                                                                                                                                     |
| 1,02 | GMDS                                      | GDP-mannose 4,6-dehydratase                                                                                                                                   |
| 1,02 | CEP95                                     | centrosomal protein 95kDa                                                                                                                                     |

|      |                                              |                                                                                                                                 |
|------|----------------------------------------------|---------------------------------------------------------------------------------------------------------------------------------|
| 1,02 | MYD88                                        | myeloid differentiation primary response 88                                                                                     |
| 1,02 | BTG3                                         | BTG family, member 3                                                                                                            |
| 1,02 | C16orf47                                     | chromosome 16 open reading frame 47                                                                                             |
| 1,02 | TMX3                                         | thioredoxin-related transmembrane protein 3                                                                                     |
| 1,02 | CHURC1                                       | churchill domain containing 1                                                                                                   |
| 1,02 | GTPBP8                                       | GTP-binding protein 8 (putative)                                                                                                |
| 1,02 | DAP                                          | death-associated protein                                                                                                        |
| 1,02 | ABCF2                                        | ATP binding cassette subfamily F member 2                                                                                       |
| 1,02 | AGPAT3                                       | 1-acylglycerol-3-phosphate O-acyltransferase 3                                                                                  |
| 1,02 | SLC17A9                                      | solute carrier family 17 (vesicular nucleotide transporter), member 9                                                           |
| 1,02 | OR5W2                                        | olfactory receptor, family 5, subfamily W, member 2                                                                             |
| 1,02 | GDPD5                                        | glycerophosphodiester phosphodiesterase domain containing 5                                                                     |
| 1,02 | AES                                          | amino-terminal enhancer of split                                                                                                |
| 1,02 | PDHB                                         | pyruvate dehydrogenase (lipoamide) beta                                                                                         |
| 1,02 | NCBP3                                        | nuclear cap binding subunit 3                                                                                                   |
| 1,02 | MME                                          | membrane metallo-endopeptidase                                                                                                  |
| 1,02 | BPY2C; BPY2                                  | basic charge, Y-linked, 2C; basic charge, Y-linked, 2                                                                           |
| 1,02 | PRRT1                                        | proline-rich transmembrane protein 1                                                                                            |
| 1,02 | FAM159A                                      | family with sequence similarity 159, member A                                                                                   |
| 1,02 | ETV3L                                        | ets variant 3-like                                                                                                              |
| 1,02 | HMGCR                                        | 3-hydroxy-3-methylglutaryl-CoA reductase                                                                                        |
| 1,02 | DCTPP1                                       | dCTP pyrophosphatase 1                                                                                                          |
| 1,02 | POLR3C                                       | polymerase (RNA) III (DNA directed) polypeptide C (62kD)                                                                        |
| 1,02 | VPS28                                        | vacuolar protein sorting 28 homolog ( <i>S. cerevisiae</i> )                                                                    |
| 1,02 | ACD                                          | adrenocortical dysplasia homolog (mouse)                                                                                        |
| 1,02 | CSHL1                                        | chorionic somatomammotropin hormone-like 1                                                                                      |
| 1,02 | SFSWAP                                       | splicing factor, suppressor of white-apricot family                                                                             |
| 1,02 | PARP12                                       | poly(ADP-ribose) polymerase family member 12                                                                                    |
| 1,02 | CD79A                                        | CD79a molecule, immunoglobulin-associated alpha                                                                                 |
| 1,02 | RRM2B                                        | ribonucleotide reductase M2 B (TP53 inducible)                                                                                  |
| 1,02 | RPL17;<br>SNORD58A;<br>SNORD58B;<br>SNORD58C | ribosomal protein L17; small nucleolar RNA, C/D box 58A; small nucleolar RNA, C/D box 58B; small nucleolar RNA, C/D box 58C     |
| 1,02 | BCL2L1                                       | BCL2-like 1                                                                                                                     |
| 1,02 | HMHB1                                        | histocompatibility (minor) HB-1                                                                                                 |
| 1,02 | AMICA1                                       | adhesion molecule, interacts with CXADR antigen 1                                                                               |
| 1,02 | GLMN                                         | glomulin, FKBP associated protein                                                                                               |
| 1,02 | AC009133.12;<br>PAGR1                        | novel transcript, antisense to C16orf53 and MVP; PAXIP1 associated glutamate-rich protein 1 [Source:HGNC Symbol;Acc:HGNC:28707] |
| 1,02 | TBX18                                        | T-box 18                                                                                                                        |
| 1,02 | TYROBP                                       | TYRO protein tyrosine kinase binding protein                                                                                    |
| 1,02 | OCSTAMP                                      | osteoclast stimulatory transmembrane protein                                                                                    |
| 1,02 | PRX                                          | periaxin                                                                                                                        |
| 1,02 | EEF1A1P5                                     | eukaryotic translation elongation factor 1 alpha 1 pseudogene 5                                                                 |

|      |                 |                                                                                                         |
|------|-----------------|---------------------------------------------------------------------------------------------------------|
| 1,02 | CD209           | CD209 molecule                                                                                          |
| 1,02 | LAMTOR3         | late endosomal/lysosomal adaptor, MAPK and MTOR activator 3                                             |
| 1,02 | SRSF2; MIR636   | serine/arginine-rich splicing factor 2; microRNA 636                                                    |
| 1,02 | C11orf45        | chromosome 11 open reading frame 45                                                                     |
| 1,02 | CCDC102A        | coiled-coil domain containing 102A                                                                      |
| 1,02 | GLIS2           | GLIS family zinc finger 2                                                                               |
| 1,02 | RFPL4AL1        | ret finger protein-like 4A-like 1                                                                       |
| 1,02 | CDIP1           | cell death-inducing p53 target 1                                                                        |
| 1,02 | OSBPL1A         | oxysterol binding protein-like 1A                                                                       |
| 1,02 | BCL2L14         | BCL2-like 14 (apoptosis facilitator)                                                                    |
| 1,02 | ISM2            | isthmin 2                                                                                               |
| 1,02 | KRT78           | keratin 78, type II                                                                                     |
| 1,02 | HLA-DPA1        | major histocompatibility complex, class II, DP alpha 1                                                  |
| 1,02 | MGAT1           | mannosyl (alpha-1,3-)-glycoprotein beta-1,2-N-acetylglucosaminyltransferase                             |
| 1,02 | TMSB4X          | thymosin beta 4, X-linked                                                                               |
| 1,02 | PRDM10          | PR domain containing 10                                                                                 |
| 1,02 | CLLU1           | chronic lymphocytic leukemia up-regulated 1                                                             |
| 1,02 | FAM192A         | family with sequence similarity 192, member A                                                           |
| 1,02 | FTL             | ferritin, light polypeptide                                                                             |
| 1,02 | CALML4          | calmodulin-like 4                                                                                       |
| 1,02 | B4GALT4         | UDP-Gal:betaGlcNAc beta 1,4- galactosyltransferase, polypeptide 4                                       |
| 1,02 | IKBKE           | inhibitor of kappa light polypeptide gene enhancer in B-cells, kinase epsilon                           |
| 1,02 | ERCC1           | excision repair cross-complementation group 1                                                           |
| 1,02 | ABCB1           | ATP binding cassette subfamily B member 1                                                               |
| 1,02 | HMBS            | hydroxymethylbilane synthase                                                                            |
| 1,02 | SLC13A3; TP53RK | solute carrier family 13 (sodium-dependent dicarboxylate transporter), member 3; TP53 regulating kinase |
| 1,02 | TGM3            | transglutaminase 3                                                                                      |
| 1,02 | FYB             | FYN binding protein                                                                                     |
| 1,02 | CGB5; CGB8      | chorionic gonadotropin, beta polypeptide 5; chorionic gonadotropin, beta polypeptide 8                  |
| 1,02 | FAM127A         | family with sequence similarity 127, member A                                                           |
| 1,02 | CCDC140         | coiled-coil domain containing 140                                                                       |
| 1,02 | MTFMT           | mitochondrial methionyl-tRNA formyltransferase                                                          |
| 1,02 | CLCN2           | chloride channel, voltage-sensitive 2                                                                   |
| 1,02 | GALNT6          | polypeptide N-acetylgalactosaminyltransferase 6                                                         |
| 1,02 | WDR36           | WD repeat domain 36                                                                                     |
| 1,02 | CAPZB           | capping protein (actin filament) muscle Z-line, beta                                                    |
| 1,02 | UBE2R2          | ubiquitin-conjugating enzyme E2R 2                                                                      |
| 1,02 | GCLM            | glutamate-cysteine ligase, modifier subunit                                                             |
| 1,02 | ACY1            | aminoacylase 1                                                                                          |
| 1,02 | TAF2            | TAF2 RNA polymerase II, TATA box binding protein (TBP)-associated factor, 150kDa                        |
| 1,02 | OXGR1           | oxoglutarate (alpha-ketoglutarate) receptor 1                                                           |

|      |                           |                                                                                                  |
|------|---------------------------|--------------------------------------------------------------------------------------------------|
| 1,02 | ZCWPW1                    | zinc finger, CW type with PWWP domain 1                                                          |
| 1,02 | CCDC13                    | coiled-coil domain containing 13                                                                 |
| 1,02 | VPS11                     | vacuolar protein sorting 11 homolog (S. cerevisiae)                                              |
| 1,02 | MED24;<br>MIR6884         | mediator complex subunit 24; microRNA 6884                                                       |
| 1,02 | HIST2H2AA3;<br>HIST2H2AA4 | histone cluster 2, H2aa3; histone cluster 2, H2aa4                                               |
| 1,02 | OR8D2                     | olfactory receptor, family 8, subfamily D, member 2<br>(gene/pseudogene)                         |
| 1,02 | MGLL                      | monoglyceride lipase                                                                             |
| 1,02 | ZNF277                    | zinc finger protein 277                                                                          |
| 1,02 | CEACAM16                  | carcinoembryonic antigen-related cell adhesion<br>molecule 16                                    |
| 1,02 | HIST1H2BE                 | histone cluster 1, H2be                                                                          |
| 1,02 | HAUS2                     | HAUS augmin like complex subunit 2                                                               |
| 1,02 | HYOU1                     | hypoxia up-regulated 1                                                                           |
| 1,02 | TSEN15                    | TSEN15 tRNA splicing endonuclease subunit                                                        |
| 1,02 | NR4A2                     | nuclear receptor subfamily 4, group A, member 2                                                  |
| 1,02 | EIF2AK1                   | eukaryotic translation initiation factor 2-alpha kinase 1                                        |
| 1,02 | UBE2G1                    | ubiquitin conjugating enzyme E2G 1                                                               |
| 1,02 | OLR1                      | oxidized low density lipoprotein (lectin-like) receptor 1                                        |
| 1,02 | FADS3                     | fatty acid desaturase 3                                                                          |
| 1,02 | PLEKHB2                   | pleckstrin homology domain containing, family B<br>(evectins) member 2                           |
| 1,02 | C5orf15                   | chromosome 5 open reading frame 15                                                               |
| 1,02 | EBAG9                     | estrogen receptor binding site associated, antigen, 9                                            |
| 1,02 | PJA2                      | praja ring finger 2, E3 ubiquitin protein ligase                                                 |
| 1,02 | USP1                      | ubiquitin specific peptidase 1                                                                   |
| 1,02 | EIF3F                     | Eukaryotic translation initiation factor 3 subunit F<br>[Source:UniProtKB/Swiss-Prot;Acc:O00303] |
| 1,02 | DSCR8                     | Down syndrome critical region 8                                                                  |
| 1,02 | PPIA                      | peptidylprolyl isomerase A (cyclophilin A)                                                       |
| 1,02 | KIF20A                    | kinesin family member 20A                                                                        |
| 1,02 | HIST1H2BC                 | histone cluster 1, H2bc                                                                          |
| 1,02 | OASL                      | 2-5-oligoadenylate synthetase-like                                                               |
| 1,02 | LHFPL4                    | lipoma HMGIC fusion partner-like 4                                                               |
| 1,02 | SRP9                      | signal recognition particle 9kDa                                                                 |
| 1,02 | TDO2                      | tryptophan 2,3-dioxygenase                                                                       |
| 1,02 | CAPN5                     | calpain 5                                                                                        |
| 1,02 | ZBTB32                    | zinc finger and BTB domain containing 32                                                         |
| 1,02 | UPK1B                     | uroplakin 1B                                                                                     |
| 1,02 | OTUD4                     | OTU deubiquitinase 4                                                                             |
| 1,02 | C7orf57                   | chromosome 7 open reading frame 57                                                               |
| 1,02 | ATP1A3                    | ATPase, Na <sup>+</sup> /K <sup>+</sup> transporting, alpha 3 polypeptide                        |
| 1,02 | SLC35C1                   | solute carrier family 35 (GDP-fucose transporter),<br>member C1                                  |
| 1,02 | DDX11                     | DEAD/H (Asp-Glu-Ala-Asp/His) box helicase 11                                                     |
| 1,02 | P4HA1                     | prolyl 4-hydroxylase, alpha polypeptide I                                                        |

|      |                                           |                                                                                                                                                                |
|------|-------------------------------------------|----------------------------------------------------------------------------------------------------------------------------------------------------------------|
| 1,02 | CUTA                                      | cutA divalent cation tolerance homolog (E. coli)                                                                                                               |
| 1,02 | RNASE9                                    | ribonuclease, RNase A family, 9 (non-active)                                                                                                                   |
| 1,02 | NUDT4P1;<br>NUDT4P2;<br>NUDT4             | nudix hydrolase 4 pseudogene 1; nudix hydrolase 4 pseudogene 2; nudix hydrolase 4                                                                              |
| 1,02 | NUDT4;<br>NUDT4P1                         | nudix hydrolase 4; nudix hydrolase 4 pseudogene 1                                                                                                              |
| 1,02 | EMC10                                     | ER membrane protein complex subunit 10                                                                                                                         |
| 1,02 | DKC1;<br>SNORA36A;<br>SNORA56;<br>MIR664B | dyskeratosis congenita 1, dyskerin; small nucleolar RNA, H/ACA box 36A; small nucleolar RNA, H/ACA box 56; microRNA 664b                                       |
| 1,02 | UBAC1                                     | UBA domain containing 1                                                                                                                                        |
| 1,02 | ELK4                                      | ELK4, ETS-domain protein (SRF accessory protein 1)                                                                                                             |
| 1,02 | TRAM2                                     | translocation associated membrane protein 2                                                                                                                    |
| 1,02 | ZNF667                                    | zinc finger protein 667                                                                                                                                        |
| 1,02 | TWSG1                                     | twisted gastrulation BMP signaling modulator 1                                                                                                                 |
| 1,02 | PDIA2                                     | protein disulfide isomerase family A, member 2                                                                                                                 |
| 1,02 | KRTAP10-11;<br>KRTAP12-3;<br>KRTAP10-12   | keratin associated protein 10-11; keratin associated protein 12-3; keratin associated protein 10-12                                                            |
| 1,02 | ADH5                                      | alcohol dehydrogenase 5 (class III), chi polypeptide                                                                                                           |
| 1,02 | HSPA5                                     | heat shock 70kDa protein 5 (glucose-regulated protein, 78kDa)                                                                                                  |
| 1,02 | CSNK1G3                                   | casein kinase 1, gamma 3                                                                                                                                       |
| 1,02 | CASKIN2                                   | CASK interacting protein 2                                                                                                                                     |
| 1,02 | LOC101927572;<br>AC002116.7;<br>CLIP3     | uncharacterized LOC101927572; Memczak2013 ANTISENSE, CDS, coding, INTERNAL, intronic best transcript NM_015526; novel transcript, antisense to CLIP3 and THAP8 |
| 1,02 | PSME3                                     | proteasome activator subunit 3                                                                                                                                 |
| 1,02 | INTS12                                    | integrator complex subunit 12                                                                                                                                  |
| 1,02 | C11orf44                                  | chromosome 11 open reading frame 44                                                                                                                            |
| 1,02 | VPS36                                     | vacuolar protein sorting 36 homolog (S. cerevisiae)                                                                                                            |
| 1,02 | CERS5                                     | ceramide synthase 5                                                                                                                                            |
| 1,02 | HRG                                       | histidine-rich glycoprotein                                                                                                                                    |
| 1,02 | SYNRG                                     | synergins, gamma                                                                                                                                               |
| 1,02 | PCBD2                                     | pterin-4 alpha-carbinolamine dehydratase/dimerization cofactor of hepatocyte nuclear factor 1 alpha (TCF1) 2                                                   |
| 1,02 | SFXN3                                     | sideroflexin 3                                                                                                                                                 |
| 1,02 | HRC                                       | histidine rich calcium binding protein                                                                                                                         |
| 1,02 | OR5P3                                     | olfactory receptor, family 5, subfamily P, member 3                                                                                                            |
| 1,02 | XPO6                                      | exportin 6                                                                                                                                                     |
| 1,02 | N6AMT2                                    | N-6 adenine-specific DNA methyltransferase 2 (putative)                                                                                                        |
| 1,02 | VIM                                       | vimentin                                                                                                                                                       |
| 1,02 | PLCB3                                     | phospholipase C, beta 3 (phosphatidylinositol-specific)                                                                                                        |
| 1,02 | PCDH20                                    | protocadherin 20                                                                                                                                               |
| 1,02 | RASL12                                    | RAS-like, family 12                                                                                                                                            |

|      |                                 |                                                                                                                                                                                                                                                                                                                                                                                                                                                                                                                                                      |
|------|---------------------------------|------------------------------------------------------------------------------------------------------------------------------------------------------------------------------------------------------------------------------------------------------------------------------------------------------------------------------------------------------------------------------------------------------------------------------------------------------------------------------------------------------------------------------------------------------|
| 1,02 | PWWP2B                          | PWWP domain containing 2B                                                                                                                                                                                                                                                                                                                                                                                                                                                                                                                            |
| 1,02 | GLTSCR1                         | glioma tumor suppressor candidate region gene 1                                                                                                                                                                                                                                                                                                                                                                                                                                                                                                      |
| 1,02 | TMEM249                         | transmembrane protein 249                                                                                                                                                                                                                                                                                                                                                                                                                                                                                                                            |
| 1,02 | SLCO4A1-AS1                     | SLCO4A1 antisense RNA 1                                                                                                                                                                                                                                                                                                                                                                                                                                                                                                                              |
| 1,02 | RFX4                            | regulatory factor X, 4 (influences HLA class II expression)                                                                                                                                                                                                                                                                                                                                                                                                                                                                                          |
| 1,02 | BTBD11                          | BTB (POZ) domain containing 11                                                                                                                                                                                                                                                                                                                                                                                                                                                                                                                       |
| 1,02 | MYPN                            | myopalladin                                                                                                                                                                                                                                                                                                                                                                                                                                                                                                                                          |
| 1,02 | PIGS                            | phosphatidylinositol glycan anchor biosynthesis class S                                                                                                                                                                                                                                                                                                                                                                                                                                                                                              |
| 1,02 | PGLS                            | 6-phosphogluconolactonase                                                                                                                                                                                                                                                                                                                                                                                                                                                                                                                            |
| 1,02 | UBASH3A                         | ubiquitin associated and SH3 domain containing A                                                                                                                                                                                                                                                                                                                                                                                                                                                                                                     |
| 1,02 | C9                              | complement component 9                                                                                                                                                                                                                                                                                                                                                                                                                                                                                                                               |
| 1,02 | RGS14                           | regulator of G-protein signaling 14                                                                                                                                                                                                                                                                                                                                                                                                                                                                                                                  |
| 1,02 | ATP11C                          | ATPase, class VI, type 11C                                                                                                                                                                                                                                                                                                                                                                                                                                                                                                                           |
| 1,02 | DDX55                           | DEAD (Asp-Glu-Ala-Asp) box polypeptide 55                                                                                                                                                                                                                                                                                                                                                                                                                                                                                                            |
| 1,02 | SDK2                            | sidekick cell adhesion molecule 2                                                                                                                                                                                                                                                                                                                                                                                                                                                                                                                    |
| 1,02 | CHST11                          | carbohydrate (chondroitin 4) sulfotransferase 11                                                                                                                                                                                                                                                                                                                                                                                                                                                                                                     |
| 1,02 | POTEB3;<br>POTEB;<br>AC136352.4 | Homo sapiens POTE ankyrin domain family, member B3 (POTEB3), transcript variant 1, mRNA.; Homo sapiens POTE ankyrin domain family, member B, mRNA (cDNA clone MGC:119371 IMAGE:40006483), complete cds.; Homo sapiens POTE ankyrin domain family, member B, mRNA (cDNA clone MGC:119372 IMAGE:40006485), complete cds.; Homo sapiens POTE ankyrin domain family, member B, mRNA (cDNA clone MGC:119373 IMAGE:40006489), complete cds.; Homo sapiens POTE ankyrin domain family, member B, mRNA (cDNA clone MGC:156116 IMAGE:40006490), complete cds. |
| 1,02 | CDH23                           | cadherin-related 23                                                                                                                                                                                                                                                                                                                                                                                                                                                                                                                                  |
| 1,02 | TNFSF18                         | tumor necrosis factor (ligand) superfamily, member 18                                                                                                                                                                                                                                                                                                                                                                                                                                                                                                |
| 1,02 | SCGB1C1                         | secretoglobin, family 1C, member 1                                                                                                                                                                                                                                                                                                                                                                                                                                                                                                                   |
| 1,02 | ILF3                            | interleukin enhancer binding factor 3                                                                                                                                                                                                                                                                                                                                                                                                                                                                                                                |
| 1,02 | WDR46;<br>MIR6873               | WD repeat domain 46; microRNA 6873                                                                                                                                                                                                                                                                                                                                                                                                                                                                                                                   |
| 1,02 | MAVS                            | Jeck2013 ANTISENSE, coding, INTERNAL, OVEXON, UTR3 best transcript NM_020746                                                                                                                                                                                                                                                                                                                                                                                                                                                                         |
| 1,02 | LRAT                            | lecithin retinol acyltransferase (phosphatidylcholine--retinol O-acyltransferase)                                                                                                                                                                                                                                                                                                                                                                                                                                                                    |
| 1,02 | ACTL6A                          | actin-like 6A                                                                                                                                                                                                                                                                                                                                                                                                                                                                                                                                        |
| 1,02 | MYL7                            | myosin light chain 7                                                                                                                                                                                                                                                                                                                                                                                                                                                                                                                                 |
| 1,02 | XRCC1                           | X-ray repair complementing defective repair in Chinese hamster cells 1                                                                                                                                                                                                                                                                                                                                                                                                                                                                               |
| 1,02 | TMEM125                         | transmembrane protein 125                                                                                                                                                                                                                                                                                                                                                                                                                                                                                                                            |
| 1,02 | CEP250                          | centrosomal protein 250kDa                                                                                                                                                                                                                                                                                                                                                                                                                                                                                                                           |
| 1,02 | SKAP1                           | src kinase associated phosphoprotein 1                                                                                                                                                                                                                                                                                                                                                                                                                                                                                                               |

|      |                                                                                     |                                                                                                                                                                                                                                                                                                                                                                                                                                                                                                                                                                        |
|------|-------------------------------------------------------------------------------------|------------------------------------------------------------------------------------------------------------------------------------------------------------------------------------------------------------------------------------------------------------------------------------------------------------------------------------------------------------------------------------------------------------------------------------------------------------------------------------------------------------------------------------------------------------------------|
| 1,02 | TBC1D3H;<br>TBC1D3L;<br>TBC1D3I;<br>LOC101060389;<br>TBC1D3C;<br>TBC1D3;<br>TBC1D3D | Homo sapiens TBC1 domain family, member 3H (TBC1D3H), mRNA.; Homo sapiens TBC1 domain family, member 3L (TBC1D3L), mRNA.; Homo sapiens TBC1 domain family, member 3I (TBC1D3I), mRNA.; Homo sapiens TBC1 domain family member-like (LOC101060389), mRNA.; TBC1 domain family member-like; Homo sapiens TBC1 domain family, member 3C, mRNA (cDNA clone MGC:87891 IMAGE:5165385), complete cds.; Homo sapiens TBC1 domain family, member 3, mRNA (cDNA clone MGC:87893 IMAGE:5742850), complete cds.; TBC1 domain family, member 3D [Source:HGNC Symbol;Acc:HGNC:28944] |
| 1,02 | RBM12B                                                                              | RNA binding motif protein 12B                                                                                                                                                                                                                                                                                                                                                                                                                                                                                                                                          |
| 1,02 | DYRK1B                                                                              | dual specificity tyrosine-(Y)-phosphorylation regulated kinase 1B                                                                                                                                                                                                                                                                                                                                                                                                                                                                                                      |
| 1,02 | SMARCA2                                                                             | SWI/SNF related, matrix associated, actin dependent regulator of chromatin, subfamily a, member 2                                                                                                                                                                                                                                                                                                                                                                                                                                                                      |
| 1,02 | CDIPT                                                                               | CDP-diacylglycerol--inositol 3-phosphatidyltransferase                                                                                                                                                                                                                                                                                                                                                                                                                                                                                                                 |
| 1,02 | USP30                                                                               | ubiquitin specific peptidase 30                                                                                                                                                                                                                                                                                                                                                                                                                                                                                                                                        |
| 1,02 | MLH1                                                                                | mutL homolog 1                                                                                                                                                                                                                                                                                                                                                                                                                                                                                                                                                         |
| 1,02 | CELA2A                                                                              | chymotrypsin-like elastase family, member 2A                                                                                                                                                                                                                                                                                                                                                                                                                                                                                                                           |
| 1,02 | UQCRC2                                                                              | ubiquinol-cytochrome c reductase core protein II                                                                                                                                                                                                                                                                                                                                                                                                                                                                                                                       |
| 1,02 | FAM111B                                                                             | family with sequence similarity 111, member B                                                                                                                                                                                                                                                                                                                                                                                                                                                                                                                          |
| 1,02 | RPS6KA6                                                                             | ribosomal protein S6 kinase, 90kDa, polypeptide 6                                                                                                                                                                                                                                                                                                                                                                                                                                                                                                                      |
| 1,02 | SLC15A1                                                                             | solute carrier family 15 (oligopeptide transporter), member 1                                                                                                                                                                                                                                                                                                                                                                                                                                                                                                          |
| 1,02 | ARF1; MIR3620                                                                       | ADP-ribosylation factor 1; microRNA 3620                                                                                                                                                                                                                                                                                                                                                                                                                                                                                                                               |
| 1,02 | MKS1                                                                                | Meckel syndrome, type 1                                                                                                                                                                                                                                                                                                                                                                                                                                                                                                                                                |
| 1,02 | MSN                                                                                 | moesin                                                                                                                                                                                                                                                                                                                                                                                                                                                                                                                                                                 |
| 1,02 | SLC22A17                                                                            | solute carrier family 22, member 17                                                                                                                                                                                                                                                                                                                                                                                                                                                                                                                                    |
| 1,02 | YWHAG                                                                               | Memczak2013 ALT_ACCEPTOR, ALT_DONOR, coding, INTERNAL, intronic best transcript NM_012479                                                                                                                                                                                                                                                                                                                                                                                                                                                                              |
| 1,02 | PLCB1                                                                               | phospholipase C, beta 1 (phosphoinositide-specific)                                                                                                                                                                                                                                                                                                                                                                                                                                                                                                                    |
| 1,02 | SLC35G4                                                                             | solute carrier family 35, member G4                                                                                                                                                                                                                                                                                                                                                                                                                                                                                                                                    |
| 1,02 | HYOU1                                                                               | hypoxia up-regulated 1                                                                                                                                                                                                                                                                                                                                                                                                                                                                                                                                                 |
| 1,02 | HNRNPD                                                                              | heterogeneous nuclear ribonucleoprotein D                                                                                                                                                                                                                                                                                                                                                                                                                                                                                                                              |
| 1,02 | NT5DC1                                                                              | 5-nucleotidase domain containing 1                                                                                                                                                                                                                                                                                                                                                                                                                                                                                                                                     |
| 1,02 | AZIN1                                                                               | antizyme inhibitor 1                                                                                                                                                                                                                                                                                                                                                                                                                                                                                                                                                   |
| 1,02 | DMGDH                                                                               | dimethylglycine dehydrogenase                                                                                                                                                                                                                                                                                                                                                                                                                                                                                                                                          |
| 1,02 | C1QL4                                                                               | complement component 1, q subcomponent-like 4                                                                                                                                                                                                                                                                                                                                                                                                                                                                                                                          |
| 1,02 | GPR1                                                                                | G protein-coupled receptor 1                                                                                                                                                                                                                                                                                                                                                                                                                                                                                                                                           |
| 1,02 | TBC1D3E                                                                             | TBC1 domain family, member 3E                                                                                                                                                                                                                                                                                                                                                                                                                                                                                                                                          |
| 1,02 | TMEM246                                                                             | transmembrane protein 246                                                                                                                                                                                                                                                                                                                                                                                                                                                                                                                                              |
| 1,02 | AQP8                                                                                | aquaporin 8                                                                                                                                                                                                                                                                                                                                                                                                                                                                                                                                                            |
| 1,02 | ST3GAL6                                                                             | ST3 beta-galactoside alpha-2,3-sialyltransferase 6                                                                                                                                                                                                                                                                                                                                                                                                                                                                                                                     |
| 1,02 | PDGFC                                                                               | platelet derived growth factor C                                                                                                                                                                                                                                                                                                                                                                                                                                                                                                                                       |
| 1,02 | LOC400558;<br>RP11-46C24.3                                                          | uncharacterized LOC400558; Transcript Identified by AceView, Entrez Gene ID(s) 400558; novel transcript                                                                                                                                                                                                                                                                                                                                                                                                                                                                |

|      |               |                                                                                      |
|------|---------------|--------------------------------------------------------------------------------------|
| 1,02 | RAI14         | retinoic acid induced 14                                                             |
| 1,02 | PRH1          | proline-rich protein HaeIII subfamily 1                                              |
| 1,02 | IPO11; LRRC70 | importin 11; leucine rich repeat containing 70                                       |
| 1,02 | C7            | complement component 7                                                               |
| 1,02 | ACO2          | aconitase 2, mitochondrial                                                           |
| 1,02 | SDHD          | succinate dehydrogenase complex subunit D, integral membrane protein                 |
| 1,02 | TCF21         | transcription factor 21                                                              |
| 1,02 | DDA1          | DET1 and DDB1 associated 1                                                           |
| 1,02 | PSMD9         | proteasome 26S subunit, non-ATPase 9                                                 |
| 1,02 | MPP3          | membrane protein, palmitoylated 3                                                    |
| 1,02 | RNGTT         | RNA guanylyltransferase and 5-phosphatase                                            |
| 1,02 | DUS3L         | dihydrouridine synthase 3-like                                                       |
| 1,02 | FASTKD2       | FAST kinase domains 2                                                                |
| 1,02 | PNPLA7        | patatin-like phospholipase domain containing 7                                       |
| 1,02 | ZNF286A       | zinc finger protein 286A                                                             |
| 1,02 | ERAP1         | Transcript Identified by AceView, Entrez Gene ID(s) 51752                            |
| 1,02 | PGRMC1        | progesterone receptor membrane component 1                                           |
| 1,02 | ARMCX5        | armadillo repeat containing, X-linked 5                                              |
| 1,02 | SSSCA1-AS1    | SSSCA1 antisense RNA 1 (head to head)                                                |
| 1,02 | MYL12A        | myosin light chain 12A                                                               |
| 1,02 | WNT9B         | wingless-type MMTV integration site family, member 9B                                |
| 1,02 | SZT2          | seizure threshold 2 homolog (mouse)                                                  |
| 1,02 | HIST1H2AB     | histone cluster 1, H2ab                                                              |
| 1,02 | FAM101B       | family with sequence similarity 101, member B                                        |
| 1,02 | ADARB2        | adenosine deaminase, RNA-specific, B2 (inactive)                                     |
| 1,02 | BLOC1S6       | biogenesis of lysosomal organelles complex-1, subunit 6, pallidin                    |
| 1,02 | GCC2          | GRIP and coiled-coil domain containing 2                                             |
| 1,02 | CYTL1         | cytokine like 1                                                                      |
| 1,02 | ZNF44         | zinc finger protein 44                                                               |
| 1,02 | FHL2          | four and a half LIM domains 2                                                        |
| 1,02 | RBMX; SNORD61 | RNA binding motif protein, X-linked; small nucleolar RNA, C/D box 61                 |
| 1,02 | ENO4          | enolase family member 4                                                              |
| 1,02 | HNRNPCL4      | heterogeneous nuclear ribonucleoprotein C-like 4 [Source:HGNC Symbol;Acc:HGNC:51333] |
| 1,02 | NKX1-2        | NK1 homeobox 2                                                                       |
| 1,02 | LRTOMT        | leucine rich transmembrane and O-methyltransferase domain containing                 |
| 1,02 | LHFP          | lipoma HMGIC fusion partner                                                          |
| 1,02 | VDAC1         | voltage-dependent anion channel 1                                                    |
| 1,02 | HSD17B12      | hydroxysteroid (17-beta) dehydrogenase 12                                            |
| 1,02 | TONSL         | tonsoku-like, DNA repair protein                                                     |
| 1,02 | SPATA16       | spermatogenesis associated 16                                                        |
| 1,02 | GAS1          | growth arrest-specific 1                                                             |
| 1,02 | NCBP2L        | nuclear cap binding protein subunit 2-like                                           |
| 1,02 | NSDHL         | NAD(P) dependent steroid dehydrogenase-like                                          |

|      |                   |                                                                            |
|------|-------------------|----------------------------------------------------------------------------|
| 1,02 | APOL3             | apolipoprotein L, 3                                                        |
| 1,02 | COX7C;<br>MIR3607 | cytochrome c oxidase subunit VIIc; microRNA 3607                           |
| 1,02 | IDH1              | isocitrate dehydrogenase 1 (NADP+)                                         |
| 1,02 | NFAM1             | NFAT activating protein with ITAM motif 1                                  |
| 1,02 | CEP57L1           | centrosomal protein 57kDa-like 1                                           |
| 1,02 | IFT80             | intraflagellar transport 80                                                |
| 1,02 | OR6K2             | olfactory receptor, family 6, subfamily K, member 2                        |
| 1,02 | MTUS2             | microtubule associated tumor suppressor candidate 2                        |
| 1,02 | FTO               | fat mass and obesity associated                                            |
| 1,02 | NGEF              | neuronal guanine nucleotide exchange factor                                |
| 1,02 | DCTN1             | dynactin 1                                                                 |
| 1,02 | DEFB131           | defensin, beta 131                                                         |
| 1,02 | SALL4             | spalt-like transcription factor 4                                          |
| 1,02 | URI1              | URI1, prefoldin-like chaperone                                             |
| 1,02 | GTF2H1            | general transcription factor IIH subunit 1                                 |
| 1,02 | CRTAP             | cartilage associated protein                                               |
| 1,02 | C14orf105         | chromosome 14 open reading frame 105                                       |
| 1,02 | KIF5C             | kinesin family member 5C                                                   |
| 1,02 | DRAP1             | DR1-associated protein 1 (negative cofactor 2 alpha)                       |
| 1,02 | EMC8              | ER membrane protein complex subunit 8                                      |
| 1,02 | AAGAB             | Transcript Identified by AceView, Entrez Gene ID(s)<br>79719               |
| 1,02 | GON4L             | gon-4-like (C. elegans)                                                    |
| 1,02 | ITPA              | inosine triphosphatase (nucleoside triphosphate<br>pyrophosphatase)        |
| 1,02 | GRAMD1B           | GRAM domain containing 1B                                                  |
| 1,02 | ABCC9             | Transcript Identified by AceView, Entrez Gene ID(s)<br>10060               |
| 1,02 | UBXN8             | UBX domain protein 8                                                       |
| 1,02 | CD101             | CD101 molecule                                                             |
| 1,02 | KIAA0368          | KIAA0368                                                                   |
| 1,02 | TAC1              | tachykinin, precursor 1                                                    |
| 1,02 | PLCZ1             | phospholipase C, zeta 1                                                    |
| 1,02 | USP34             | Transcript Identified by AceView, Entrez Gene ID(s)<br>9736                |
| 1,02 | MFAP3L            | microfibrillar associated protein 3 like                                   |
| 1,02 | KCNG1             | potassium channel, voltage gated modifier subfamily<br>G, member 1         |
| 1,02 | CBX1              | chromobox homolog 1                                                        |
| 1,02 | PPRC1             | peroxisome proliferator-activated receptor gamma,<br>coactivator-related 1 |
| 1,02 | SYS1              | Sys1 golgi trafficking protein                                             |
| 1,02 | PDAP1             | PDGFA associated protein 1                                                 |
| 1,02 | PLP2              | proteolipid protein 2 (colonic epithelium-enriched)                        |
| 1,02 | KRTAP4-8          | keratin associated protein 4-8                                             |
| 1,02 | CDH3              | cadherin 3, type 1, P-cadherin (placental)                                 |
| 1,02 | AP5M1             | adaptor-related protein complex 5, mu 1 subunit                            |
| 1,02 | NSUN2             | NOP2/Sun RNA methyltransferase family, member 2                            |
| 1,02 | SH3D21            | SH3 domain containing 21                                                   |

|      |                     |                                                                                                           |
|------|---------------------|-----------------------------------------------------------------------------------------------------------|
| 1,02 | LRRC61              | leucine rich repeat containing 61                                                                         |
| 1,02 | YTHDF2              | YTH N(6)-methyladenosine RNA binding protein 2                                                            |
| 1,02 | OR5P2               | olfactory receptor, family 5, subfamily P, member 2                                                       |
| 1,02 | MYO1G               | Memczak2013 ANTISENSE, CDS, coding, INTERNAL best transcript NM_033054                                    |
| 1,02 | EIF4H               | eukaryotic translation initiation factor 4H                                                               |
| 1,02 | C1QBP               | complement component 1, q subcomponent binding protein                                                    |
| 1,02 | LRIG1               |                                                                                                           |
| 1,02 | NOX1                | NADPH oxidase 1                                                                                           |
| 1,02 | PEX2                | peroxisomal biogenesis factor 2                                                                           |
| 1,02 | IL11                | interleukin 11                                                                                            |
| 1,02 | SOAT1               | sterol O-acyltransferase 1                                                                                |
| 1,02 | GOLGA8N;<br>GOLGA8H | golgin A8 family, member N; golgin A8 family, member H                                                    |
| 1,02 | ANGEL2              | angel homolog 2 (Drosophila)                                                                              |
| 1,02 | MED29               | mediator complex subunit 29                                                                               |
| 1,02 | S1PR1               | sphingosine-1-phosphate receptor 1                                                                        |
| 1,02 | CALCRL              | calcitonin receptor like receptor                                                                         |
| 1,02 | IQSEC1              | IQ motif and Sec7 domain 1                                                                                |
| 1,02 | CXCL3               | chemokine (C-X-C motif) ligand 3                                                                          |
| 1,02 | PROKR2              | prokineticin receptor 2                                                                                   |
| 1,02 | CMTM5               | CKLF-like MARVEL transmembrane domain containing 5                                                        |
| 1,02 | CCDC59              | coiled-coil domain containing 59                                                                          |
| 1,02 | TACR1               | tachykinin receptor 1                                                                                     |
| 1,02 | SIGIRR              | single immunoglobulin and toll-interleukin 1 receptor (TIR) domain                                        |
| 1,02 | MRPL34              | mitochondrial ribosomal protein L34                                                                       |
| 1,02 | ATP5SL              | ATP5S-like                                                                                                |
| 1,02 | IFFO1               | intermediate filament family orphan 1                                                                     |
| 1,02 | FAM65C              | family with sequence similarity 65, member C                                                              |
| 1,02 | HYOU1               | hypoxia up-regulated 1                                                                                    |
| 1,02 | ZNF230              | zinc finger protein 230                                                                                   |
| 1,02 | PIIB                | Jeck2013 ALT_ACCEPTOR, ALT_DONOR, coding, INTERNAL, intronic, OVERLAPTX, OVEXON best transcript NM_000942 |
| 1,02 | TUBA4B              | tubulin, alpha 4b                                                                                         |
| 1,02 | FBXL2               | F-box and leucine-rich repeat protein 2                                                                   |
| 1,02 | FAM118B             | family with sequence similarity 118, member B                                                             |
| 1,02 | ANKRD66             | ankyrin repeat domain 66                                                                                  |
| 1,02 | SLC6A9              | solute carrier family 6 (neurotransmitter transporter, glycine), member 9                                 |
| 1,02 | NADSYN1             | NAD synthetase 1                                                                                          |
| 1,02 | KDM6A               | lysine (K)-specific demethylase 6A                                                                        |
| 1,02 | AC208162.1          |                                                                                                           |
| 1,02 | LANCL1              | LanC lantibiotic synthetase component C-like 1 (bacterial)                                                |
| 1,02 | EIF3A               | eukaryotic translation initiation factor 3, subunit A                                                     |
| 1,02 | SUSD3               | sushi domain containing 3                                                                                 |

|      |                                                   |                                                                                                                                                                                                     |
|------|---------------------------------------------------|-----------------------------------------------------------------------------------------------------------------------------------------------------------------------------------------------------|
| 1,02 | NONO                                              | non-POU domain containing, octamer-binding                                                                                                                                                          |
| 1,02 | MARS; MIR6758                                     | methionyl-tRNA synthetase; microRNA 6758                                                                                                                                                            |
| 1,02 | KRT6A                                             | keratin 6A, type II                                                                                                                                                                                 |
| 1,02 | FSCB                                              | fibrous sheath CABYR binding protein                                                                                                                                                                |
| 1,02 | LURAP1L                                           | leucine rich adaptor protein 1-like                                                                                                                                                                 |
| 1,02 | FIBP                                              | fibroblast growth factor (acidic) intracellular binding protein                                                                                                                                     |
| 1,02 | RAVER1                                            | ribonucleoprotein, PTB-binding 1                                                                                                                                                                    |
| 1,02 | C20orf173                                         | chromosome 20 open reading frame 173                                                                                                                                                                |
| 1,02 | ASB8                                              | ankyrin repeat and SOCS box containing 8                                                                                                                                                            |
| 1,02 | SMIM21                                            | small integral membrane protein 21                                                                                                                                                                  |
| 1,02 | NMUR2                                             | neuromedin U receptor 2                                                                                                                                                                             |
| 1,02 | CCAR1; SNORD98                                    | cell division cycle and apoptosis regulator 1; small nucleolar RNA, C/D box 98                                                                                                                      |
| 1,02 | SMCO4                                             | single-pass membrane protein with coiled-coil domains 4                                                                                                                                             |
| 1,02 | DPH1; OVCA2                                       | diphthamide biosynthesis 1; ovarian tumor suppressor candidate 2                                                                                                                                    |
| 1,02 | SLFN14                                            | schlafen family member 14                                                                                                                                                                           |
| 1,02 | PCK2                                              | phosphoenolpyruvate carboxykinase 2 (mitochondrial)                                                                                                                                                 |
| 1,02 | OR56B4                                            | olfactory receptor, family 56, subfamily B, member 4                                                                                                                                                |
| 1,02 | MRPL46                                            | mitochondrial ribosomal protein L46                                                                                                                                                                 |
| 1,02 | HMBS                                              | hydroxymethylbilane synthase                                                                                                                                                                        |
| 1,02 | EIF4A2; SNORA63; SNORD2; SNORA4; SNORA81; MIR1248 | eukaryotic translation initiation factor 4A2; small nucleolar RNA, H/ACA box 63; small nucleolar RNA, C/D box 2; small nucleolar RNA, H/ACA box 4; small nucleolar RNA, H/ACA box 81; microRNA 1248 |
| 1,02 | WDR43; SNORD53                                    | WD repeat domain 43; small nucleolar RNA, C/D box 53                                                                                                                                                |
| 1,02 | PPP1R1C                                           | protein phosphatase 1, regulatory (inhibitor) subunit 1C                                                                                                                                            |
| 1,02 | CFAP74                                            | cilia and flagella associated protein 74                                                                                                                                                            |
| 1,02 | CBFB                                              | core-binding factor, beta subunit                                                                                                                                                                   |
| 1,02 | AQP12A                                            | aquaporin 12A                                                                                                                                                                                       |
| 1,02 | OR6Y1                                             | olfactory receptor, family 6, subfamily Y, member 1                                                                                                                                                 |
| 1,02 | RSL1D1                                            | ribosomal L1 domain containing 1                                                                                                                                                                    |
| 1,02 | PABPN1L                                           | poly(A) binding protein, nuclear 1-like (cytoplasmic)                                                                                                                                               |
| 1,02 | RAB1B                                             | RAB1B, member RAS oncogene family                                                                                                                                                                   |
| 1,02 | AP3M2                                             | adaptor-related protein complex 3, mu 2 subunit                                                                                                                                                     |
| 1,02 | ZNF618                                            | Zhang2013 ALT_ACCEPTOR, ALT_DONOR, coding, INTERNAL, intronic best transcript NM_133374                                                                                                             |
| 1,02 | AFG3L2                                            | AFG3-like AAA ATPase 2                                                                                                                                                                              |
| 1,02 | FAM107B                                           | Memczak2013 ALT_ACCEPTOR, ALT_DONOR, coding, INTERNAL, intronic best transcript NM_031453                                                                                                           |
| 1,02 | ATP6V1F                                           | ATPase, H <sup>+</sup> transporting, lysosomal 14kDa, V1 subunit F                                                                                                                                  |

|      |                                                                                |                                                                                                                                                                                                                |
|------|--------------------------------------------------------------------------------|----------------------------------------------------------------------------------------------------------------------------------------------------------------------------------------------------------------|
| 1,02 | SPANXN5                                                                        | SPANX family, member N5                                                                                                                                                                                        |
| 1,02 | TMCO3                                                                          | transmembrane and coiled-coil domains 3                                                                                                                                                                        |
| 1,02 | NUDT17                                                                         | nudix hydrolase 17                                                                                                                                                                                             |
| 1,02 | ATF3                                                                           | activating transcription factor 3                                                                                                                                                                              |
| 1,02 | GJA3                                                                           | gap junction protein alpha 3                                                                                                                                                                                   |
| 1,02 | CDC20                                                                          | cell division cycle 20                                                                                                                                                                                         |
| 1,02 | NAA10                                                                          | N(alpha)-acetyltransferase 10, NatA catalytic subunit                                                                                                                                                          |
| 1,02 | ADSS                                                                           | adenylosuccinate synthase                                                                                                                                                                                      |
| 1,02 | PSMC6                                                                          | proteasome 26S subunit, ATPase 6                                                                                                                                                                               |
| 1,02 | SLC25A43                                                                       | solute carrier family 25, member 43                                                                                                                                                                            |
| 1,02 | DYNC1I2                                                                        | dynein, cytoplasmic 1, intermediate chain 2                                                                                                                                                                    |
| 1,02 | ZNF451                                                                         | zinc finger protein 451                                                                                                                                                                                        |
| 1,02 | KIR2DL4                                                                        | killer cell immunoglobulin-like receptor, two domains, long cytoplasmic tail, 4                                                                                                                                |
| 1,02 | MRPL51                                                                         | mitochondrial ribosomal protein L51                                                                                                                                                                            |
| 1,02 | VSTM2L                                                                         | V-set and transmembrane domain containing 2 like                                                                                                                                                               |
| 1,02 | PHLDB3                                                                         | pleckstrin homology-like domain, family B, member 3                                                                                                                                                            |
| 1,02 | FKBP11; ARF3                                                                   | FK506 binding protein 11; ADP-ribosylation factor 3                                                                                                                                                            |
| 1,02 | KIAA1324L                                                                      | KIAA1324-like                                                                                                                                                                                                  |
| 1,02 | POLR2J4                                                                        | polymerase (RNA) II (DNA directed) polypeptide J4, pseudogene                                                                                                                                                  |
| 1,02 | THEG5;<br>AC011525.4;<br>pleysey                                               | testis highly expressed protein 5; novel transcript;<br>Transcript Identified by AceView                                                                                                                       |
| 1,02 | ZNF174                                                                         | zinc finger protein 174                                                                                                                                                                                        |
| 1,02 | NOP56;<br>SNORD57;<br>SNORD56;<br>SNORA51;<br>SNORD110;<br>SNORD86;<br>MIR1292 | NOP56 ribonucleoprotein; small nucleolar RNA, C/D box 57; small nucleolar RNA, C/D box 56; small nucleolar RNA, H/ACA box 51; small nucleolar RNA, C/D box 110; small nucleolar RNA, C/D box 86; microRNA 1292 |
| 1,02 | HMGCLL1                                                                        | 3-hydroxymethyl-3-methylglutaryl-CoA lyase-like 1                                                                                                                                                              |
| 1,02 | EID3                                                                           | EP300 interacting inhibitor of differentiation 3                                                                                                                                                               |
| 1,02 | CEL                                                                            | carboxyl ester lipase                                                                                                                                                                                          |
| 1,02 | B3GALT6                                                                        | UDP-Gal:betaGal beta 1,3-galactosyltransferase 6                                                                                                                                                               |
| 1,02 | SULF2                                                                          | sulfatase 2                                                                                                                                                                                                    |
| 1,02 | LINC00482                                                                      | long intergenic non-protein coding RNA 482                                                                                                                                                                     |
| 1,02 | THOC3                                                                          | THO complex 3                                                                                                                                                                                                  |
| 1,02 | ARL5B                                                                          | ADP-ribosylation factor like GTPase 5B                                                                                                                                                                         |
| 1,02 | LOC149373; RP5-1097F14.3;<br>kosimo                                            | uncharacterized LOC149373; Transcript Identified by AceView; novel transcript                                                                                                                                  |
| 1,02 | ZSCAN22;<br>MIR6806                                                            | zinc finger and SCAN domain containing 22;<br>microRNA 6806                                                                                                                                                    |
| 1,02 | RNF11                                                                          | ring finger protein 11                                                                                                                                                                                         |
| 1,02 | RBBP8; MIR4741                                                                 | retinoblastoma binding protein 8; microRNA 4741                                                                                                                                                                |
| 1,02 | DYRK1B                                                                         | dual specificity tyrosine-(Y)-phosphorylation regulated kinase 1B                                                                                                                                              |
| 1,02 | TAS2R46                                                                        | taste receptor, type 2, member 46                                                                                                                                                                              |
| 1,02 | EHD2                                                                           | EH domain containing 2                                                                                                                                                                                         |

|      |                                                |                                                                                                                                                                                               |
|------|------------------------------------------------|-----------------------------------------------------------------------------------------------------------------------------------------------------------------------------------------------|
| 1,02 | OR2T33                                         | olfactory receptor, family 2, subfamily T, member 33                                                                                                                                          |
| 1,02 | FAM129C                                        | family with sequence similarity 129, member C                                                                                                                                                 |
| 1,02 | TGOLN2                                         | Memczak2013 ANTISENSE, CDS, coding, INTERNAL best transcript NM_001206844                                                                                                                     |
| 1,02 | TRIM8                                          | tripartite motif containing 8                                                                                                                                                                 |
| 1,02 | SERP2                                          | stress-associated endoplasmic reticulum protein family member 2                                                                                                                               |
| 1,02 | APOE                                           | apolipoprotein E                                                                                                                                                                              |
| 1,02 | CCDC153                                        | coiled-coil domain containing 153                                                                                                                                                             |
| 1,02 | ERI1                                           | exoribonuclease 1                                                                                                                                                                             |
| 1,02 | CDK9                                           | cyclin-dependent kinase 9                                                                                                                                                                     |
| 1,02 | PRKCA                                          | protein kinase C, alpha                                                                                                                                                                       |
| 1,02 | SF3A3                                          | splicing factor 3a subunit 3                                                                                                                                                                  |
| 1,02 | LDLRAD2                                        | low density lipoprotein receptor class A domain containing 2                                                                                                                                  |
| 1,02 | RAC2                                           | ras-related C3 botulinum toxin substrate 2 (rho family, small GTP binding protein Rac2)                                                                                                       |
| 1,02 | AKR1B1                                         | aldo-keto reductase family 1, member B1 (aldose reductase)                                                                                                                                    |
| 1,02 | BCAR1                                          | breast cancer anti-estrogen resistance 1                                                                                                                                                      |
| 1,02 | PMFBP1                                         | polyamine modulated factor 1 binding protein 1                                                                                                                                                |
| 1,02 | TOR1AIP1                                       | torsin A interacting protein 1                                                                                                                                                                |
| 1,02 | CCDC117                                        | coiled-coil domain containing 117                                                                                                                                                             |
| 1,02 | SPRR2E                                         | small proline-rich protein 2E                                                                                                                                                                 |
| 1,02 | PDLIM3                                         | PDZ and LIM domain 3                                                                                                                                                                          |
| 1,02 | THOC5                                          | THO complex 5                                                                                                                                                                                 |
| 1,02 | C18orf32                                       | chromosome 18 open reading frame 32                                                                                                                                                           |
| 1,02 | C22orf24                                       | chromosome 22 open reading frame 24                                                                                                                                                           |
| 1,02 | BEND7                                          | BEN domain containing 7                                                                                                                                                                       |
| 1,02 | ARC                                            | activity-regulated cytoskeleton-associated protein                                                                                                                                            |
| 1,02 | MAST3                                          | microtubule associated serine/threonine kinase 3                                                                                                                                              |
| 1,02 | RNF215                                         | ring finger protein 215                                                                                                                                                                       |
| 1,02 | RIF1                                           | replication timing regulatory factor 1                                                                                                                                                        |
| 1,02 | SIGMAR1                                        | sigma non-opioid intracellular receptor 1                                                                                                                                                     |
| 1,02 | FOXC1                                          | forkhead box C1                                                                                                                                                                               |
| 1,02 | CCDC189                                        | coiled-coil domain containing 189                                                                                                                                                             |
| 1,02 | PGRMC2                                         | progesterone receptor membrane component 2                                                                                                                                                    |
| 1,02 | KLF16                                          | Kruppel-like factor 16                                                                                                                                                                        |
| 1,02 | CRIP1                                          | cysteine-rich PDZ-binding protein                                                                                                                                                             |
| 1,02 | TFE3                                           | transcription factor binding to IGHM enhancer 3                                                                                                                                               |
| 1,02 | ZNF585B                                        | zinc finger protein 585B                                                                                                                                                                      |
| 1,02 | MGRN1                                          | mahogunin ring finger 1, E3 ubiquitin protein ligase                                                                                                                                          |
| 1,02 | ATXN2                                          | ataxin 2                                                                                                                                                                                      |
| 1,02 | LOC101928161;<br>AC010890.1;<br>NCKAP5; spawfa | uncharacterized LOC101928161; Salzman2013 ANTISENSE, coding, INTERNAL, intronic, OVERLAPTX best transcript NM_207363; novel transcript, antisense to NCKAP5; Transcript Identified by AceView |
| 1,02 | PNLIPRP1                                       | pancreatic lipase-related protein 1                                                                                                                                                           |
| 1,02 | ANO7                                           | anoctamin 7                                                                                                                                                                                   |

|      |                     |                                                                        |
|------|---------------------|------------------------------------------------------------------------|
| 1,02 | PPP1R13L            | protein phosphatase 1, regulatory subunit 13 like                      |
| 1,02 | CREB5               | cAMP responsive element binding protein 5                              |
| 1,02 | TACC2               | transforming, acidic coiled-coil containing protein 2                  |
| 1,02 | SNX27               | sorting nexin family member 27                                         |
| 1,02 | CFAP57              | cilia and flagella associated protein 57                               |
| 1,02 | KPNA4               | karyopherin alpha 4 (importin alpha 3)                                 |
| 1,02 | SLTM                | SAFB-like, transcription modulator                                     |
| 1,02 | NRCAM               | neuronal cell adhesion molecule                                        |
| 1,02 | GLTSCR1L            | GLTSCR1-like                                                           |
| 1,02 | OR6K3               | olfactory receptor, family 6, subfamily K, member 3                    |
| 1,02 | CNOT7               | CCR4-NOT transcription complex subunit 7                               |
| 1,02 | FAM109B             | family with sequence similarity 109, member B                          |
| 1,02 | RAB33A              | RAB33A, member RAS oncogene family                                     |
| 1,02 | RING1               | ring finger protein 1                                                  |
| 1,02 | EMC1                | ER membrane protein complex subunit 1                                  |
| 1,02 | CA5B                | carbonic anhydrase VB, mitochondrial                                   |
| 1,02 | USPL1               | ubiquitin specific peptidase like 1                                    |
| 1,02 | RNASEH1             | ribonuclease H1                                                        |
| 1,02 | GMIP                | GEM interacting protein                                                |
| 1,02 | TEX14               | testis expressed 14                                                    |
| 1,02 | STAG2               | stromal antigen 2                                                      |
| 1,02 | USP14               | ubiquitin specific peptidase 14 (tRNA-guanine transglycosylase)        |
| 1,02 | MIPOL1              | mirror-image polydactyly 1                                             |
| 1,02 | EXOSC4;<br>MIR6847  | exosome component 4; microRNA 6847                                     |
| 1,02 | PDZRN3              | PDZ domain containing ring finger 3                                    |
| 1,02 | SLC43A2             | solute carrier family 43 (amino acid system L transporter), member 2   |
| 1,02 | ETV3                | ets variant 3                                                          |
| 1,02 | BCL2                | B-cell CLL/lymphoma 2                                                  |
| 1,02 | DLD                 | dihydrolipoamide dehydrogenase                                         |
| 1,02 | ALDH1A1             | aldehyde dehydrogenase 1 family, member A1                             |
| 1,02 | SYT7                | synaptotagmin VII                                                      |
| 1,02 | BOLA2B;<br>BOLA2    | bolA family member 2B; bolA family member 2                            |
| 1,02 | THAP4               | THAP domain containing 4                                               |
| 1,02 | P2RY4               | pyrimidinergic receptor P2Y, G-protein coupled, 4                      |
| 1,02 | SOX5                | Transcript Identified by AceView, Entrez Gene ID(s)<br>6660            |
| 1,02 | MRPL9               | mitochondrial ribosomal protein L9                                     |
| 1,02 | SLC46A3             | solute carrier family 46, member 3                                     |
| 1,02 | SYNDIG1L            | synapse differentiation inducing 1-like                                |
| 1,02 | PRR5                | proline rich 5 (renal)                                                 |
| 1,02 | SLC26A6;<br>MIR6824 | solute carrier family 26 (anion exchanger), member 6;<br>microRNA 6824 |
| 1,02 | SPATC1L             | spermatogenesis and centriole associated 1-like                        |
| 1,02 | TMEM86B             | transmembrane protein 86B                                              |
| 1,02 | EEPD1               | endonuclease/exonuclease/phosphatase family domain<br>containing 1     |

|      |           |                                                                                               |
|------|-----------|-----------------------------------------------------------------------------------------------|
| 1,02 | CDC73     | cell division cycle 73                                                                        |
| 1,02 | GSTCD     | glutathione S-transferase, C-terminal domain containing                                       |
| 1,02 | SLC12A6   | solute carrier family 12 (potassium/chloride transporter), member 6                           |
| 1,02 | TCOF1     | Treacher Collins-Franceschetti syndrome 1                                                     |
| 1,02 | DDX17     | DEAD (Asp-Glu-Ala-Asp) box helicase 17                                                        |
| 1,02 | TADA2B    | transcriptional adaptor 2B                                                                    |
| 1,02 | TNFRSF10C | tumor necrosis factor receptor superfamily, member 10c, decoy without an intracellular domain |
| 1,02 | RTFDC1    | replication termination factor 2 domain containing 1                                          |
| 1,02 | FZD4      | frizzled class receptor 4                                                                     |
| 1,02 | NEK11     | NIMA-related kinase 11                                                                        |
| 1,02 | C2orf57   | chromosome 2 open reading frame 57                                                            |
| 1,02 | CREB1     | cAMP responsive element binding protein 1                                                     |
| 1,02 | NR1I2     | nuclear receptor subfamily 1, group I, member 2                                               |
| 1,02 | ALK       | anaplastic lymphoma receptor tyrosine kinase                                                  |
| 1,02 | IL17RA    | interleukin 17 receptor A                                                                     |
| 1,02 | ANKDD1B   | ankyrin repeat and death domain containing 1B                                                 |
| 1,02 | AGAP4     | ArfGAP with GTPase domain, ankyrin repeat and PH domain 4                                     |
| 1,02 | EP400NL   | EP400 N-terminal like                                                                         |
| 1,02 | GJA5      | gap junction protein alpha 5                                                                  |
| 1,02 | IMPDH2    | IMP (inosine 5-monophosphate) dehydrogenase 2                                                 |
| 1,02 | RINT1     | RAD50 interactor 1                                                                            |
| 1,02 | VMO1      | vitelline membrane outer layer 1 homolog (chicken)                                            |
| 1,02 | ZNF765    | zinc finger protein 765                                                                       |
| 1,02 | NIFK      | nucleolar protein interacting with the FHA domain of MKI67                                    |
| 1,02 | CCNL2     | cyclin L2                                                                                     |
| 1,02 | ACAP3     | ArfGAP with coiled-coil, ankyrin repeat and PH domains 3                                      |
| 1,02 | PLA2G2F   | phospholipase A2, group IIF                                                                   |
| 1,02 | HSPA4L    | heat shock 70kDa protein 4-like                                                               |
| 1,02 | MRPS17    | mitochondrial ribosomal protein S17                                                           |
| 1,02 | GALNT1    | polypeptide N-acetylgalactosaminyltransferase 1                                               |
| 1,02 | ZCCHC4    | zinc finger, CCHC domain containing 4                                                         |
| 1,02 | KLK5      | kallikrein related peptidase 5                                                                |
| 1,02 | TAAR8     | trace amine associated receptor 8                                                             |
| 1,02 | HEPACAM   | hepatic and glial cell adhesion molecule                                                      |
| 1,02 | ZNF768    | zinc finger protein 768                                                                       |
| 1,02 | PDE6C     | phosphodiesterase 6C, cGMP-specific, cone, alpha prime                                        |
| 1,02 | WAC       | WW domain containing adaptor with coiled-coil                                                 |
| 1,02 | FBL       | fibrillarin                                                                                   |
| 1,02 | RBM18     | RNA binding motif protein 18                                                                  |
| 1,02 | CPXM1     | carboxypeptidase X (M14 family), member 1                                                     |
| 1,02 | PRKAG2    | protein kinase, AMP-activated, gamma 2 non-catalytic subunit                                  |
| 1,02 | HYOU1     | hypoxia up-regulated 1                                                                        |

|      |                  |                                                                            |
|------|------------------|----------------------------------------------------------------------------|
| 1,02 | CYP51A1          | cytochrome P450, family 51, subfamily A, polypeptide 1                     |
| 1,02 | RTCB             | RNA 2,3-cyclic phosphate and 5-OH ligase                                   |
| 1,02 | TCTEX1D1         | Tctex1 domain containing 1                                                 |
| 1,02 | POM121C          | POM121 transmembrane nucleoporin C                                         |
| 1,02 | MPV17            | MpV17 mitochondrial inner membrane protein                                 |
| 1,02 | CHADL            | chondroadherin-like                                                        |
| 1,02 | FOXR1            | forkhead box R1                                                            |
| 1,02 | PRAMEF12         | PRAME family member 12                                                     |
| 1,02 | DKK3             | dickkopf WNT signaling pathway inhibitor 3                                 |
| 1,02 | C1QTNF6          | C1q and tumor necrosis factor related protein 6                            |
| 1,02 | AMDHD2           | amidohydrolase domain containing 2                                         |
| 1,02 | CASC10           | cancer susceptibility candidate 10                                         |
| 1,02 | STXBP2           | syntaxin binding protein 2                                                 |
| 1,02 | UGGT2            | UDP-glucose glycoprotein glucosyltransferase 2                             |
| 1,02 | PTPN18           | protein tyrosine phosphatase, non-receptor type 18 (brain-derived)         |
| 1,02 | RBSN             | rabenosyn, RAB effector                                                    |
| 1,02 | ELOVL5           | ELOVL fatty acid elongase 5                                                |
| 1,02 | FBL              | fibrillarin                                                                |
| 1,02 | CYP2C19          | cytochrome P450, family 2, subfamily C, polypeptide 19                     |
| 1,02 | TSR1             | TSR1, 20S rRNA accumulation, homolog (S. cerevisiae)                       |
| 1,02 | PTGIS            | prostaglandin I2 (prostacyclin) synthase                                   |
| 1,02 | OR11H2           | olfactory receptor, family 11, subfamily H, member 2                       |
| 1,02 | PDDC1            | Parkinson disease 7 domain containing 1                                    |
| 1,02 | MAP4K3           | mitogen-activated protein kinase kinase kinase kinase 3                    |
| 1,02 | CCDC179          | coiled-coil domain containing 179                                          |
| 1,02 | GLRX3            | glutaredoxin 3                                                             |
| 1,02 | GOLGA6L3         | golgin A6 family-like 3                                                    |
| 1,02 | RUFY4            | RUN and FYVE domain containing 4                                           |
| 1,02 | PHF19            | Transcript Identified by AceView, Entrez Gene ID(s) 26147                  |
| 1,02 | ZNF792           | zinc finger protein 792                                                    |
| 1,02 | CHIC1            | cysteine rich hydrophobic domain 1                                         |
| 1,02 | DGKD             | diacylglycerol kinase, delta 130kDa                                        |
| 1,02 | EXOSC1           | exosome component 1                                                        |
| 1,02 | ZNF345           | zinc finger protein 345                                                    |
| 1,02 | NMD3             | NMD3 ribosome export adaptor                                               |
| 1,02 | IDUA             | iduronidase, alpha-L-                                                      |
| 1,02 | SH3BP2           | SH3-domain binding protein 2                                               |
| 1,02 | TCF7             | transcription factor 7 (T-cell specific, HMG-box)                          |
| 1,02 | SCAMP4;<br>ADAT3 | secretory carrier membrane protein 4; adenosine deaminase, tRNA-specific 3 |
| 1,02 | UBE2F            | ubiquitin-conjugating enzyme E2F (putative)                                |
| 1,02 | TRAPPC5          | trafficking protein particle complex 5                                     |
| 1,02 | GLUD2            | glutamate dehydrogenase 2                                                  |

|      |                                                                                                    |                                                                                                                                                                                                                                                                                                              |
|------|----------------------------------------------------------------------------------------------------|--------------------------------------------------------------------------------------------------------------------------------------------------------------------------------------------------------------------------------------------------------------------------------------------------------------|
| 1,02 | GNG10                                                                                              | guanine nucleotide binding protein (G protein), gamma 10                                                                                                                                                                                                                                                     |
| 1,02 | KRTAP3-3                                                                                           | keratin associated protein 3-3                                                                                                                                                                                                                                                                               |
| 1,02 | GCM1                                                                                               | glial cells missing homolog 1 (Drosophila)                                                                                                                                                                                                                                                                   |
| 1,02 | GAP43                                                                                              | growth associated protein 43                                                                                                                                                                                                                                                                                 |
| 1,02 | ZNF146                                                                                             | zinc finger protein 146                                                                                                                                                                                                                                                                                      |
| 1,02 | PDE6B                                                                                              | phosphodiesterase 6B, cGMP-specific, rod, beta                                                                                                                                                                                                                                                               |
| 1,02 | PLPP7                                                                                              | phospholipid phosphatase 7 (inactive)                                                                                                                                                                                                                                                                        |
| 1,02 | PAPD5                                                                                              | PAP associated domain containing 5                                                                                                                                                                                                                                                                           |
| 1,02 | FJX1                                                                                               | four jointed box 1                                                                                                                                                                                                                                                                                           |
| 1,02 | FGFR1                                                                                              | fibroblast growth factor receptor 1                                                                                                                                                                                                                                                                          |
| 1,02 | ZNF534                                                                                             | zinc finger protein 534                                                                                                                                                                                                                                                                                      |
| 1,02 | ADAM29                                                                                             | ADAM metallopeptidase domain 29                                                                                                                                                                                                                                                                              |
| 1,02 | SREK1                                                                                              | splicing regulatory glutamine/lysine-rich protein 1                                                                                                                                                                                                                                                          |
| 1,02 | RUFY1                                                                                              | RUN and FYVE domain containing 1                                                                                                                                                                                                                                                                             |
| 1,02 | HMGA2                                                                                              | high mobility group AT-hook 2                                                                                                                                                                                                                                                                                |
| 1,02 | CLPTM1L                                                                                            | CLPTM1-like                                                                                                                                                                                                                                                                                                  |
| 1,02 | ANKLE2                                                                                             | ankyrin repeat and LEM domain containing 2                                                                                                                                                                                                                                                                   |
| 1,02 | SUN2                                                                                               | Sad1 and UNC84 domain containing 2                                                                                                                                                                                                                                                                           |
| 1,02 | SMARCAD1                                                                                           | SWI/SNF-related, matrix-associated actin-dependent regulator of chromatin, subfamily a, containing DEAD/H box 1                                                                                                                                                                                              |
| 1,02 | C17orf50                                                                                           | chromosome 17 open reading frame 50                                                                                                                                                                                                                                                                          |
| 1,02 | C20orf194                                                                                          | chromosome 20 open reading frame 194                                                                                                                                                                                                                                                                         |
| 1,02 | HNRNPA0                                                                                            | heterogeneous nuclear ribonucleoprotein A0                                                                                                                                                                                                                                                                   |
| 1,02 | CPM                                                                                                | carboxypeptidase M                                                                                                                                                                                                                                                                                           |
| 1,02 | CATSPERD                                                                                           | catsper channel auxiliary subunit delta                                                                                                                                                                                                                                                                      |
| 1,02 | OSM                                                                                                | oncostatin M                                                                                                                                                                                                                                                                                                 |
| 1,02 | TRAPPC9                                                                                            | trafficking protein particle complex 9                                                                                                                                                                                                                                                                       |
| 1,02 | LETM2                                                                                              | leucine zipper-EF-hand containing transmembrane protein 2                                                                                                                                                                                                                                                    |
| 1,02 | TAF1B                                                                                              | TATA box binding protein (TBP)-associated factor, RNA polymerase I, B, 63kDa                                                                                                                                                                                                                                 |
| 1,02 | SDK1                                                                                               | sidekick cell adhesion molecule 1                                                                                                                                                                                                                                                                            |
| 1,02 | INO80B                                                                                             | INO80 complex subunit B                                                                                                                                                                                                                                                                                      |
| 1,02 | HSP90B1;<br>MIR3652                                                                                | heat shock protein 90kDa beta (Grp94), member 1;<br>microRNA 3652                                                                                                                                                                                                                                            |
| 1,02 | LCE3D                                                                                              | late cornified envelope 3D                                                                                                                                                                                                                                                                                   |
| 1,02 | SLC35D1                                                                                            | solute carrier family 35 (UDP-GlcA/UDP-GalNAc transporter), member D1                                                                                                                                                                                                                                        |
| 1,02 | PEX3                                                                                               | peroxisomal biogenesis factor 3                                                                                                                                                                                                                                                                              |
| 1,02 | TAF1D;<br>SNORA8;<br>SNORA18;<br>SNORA40;<br>SNORA1;<br>SNORA25;<br>SNORA32;<br>SNORD5;<br>MIR1304 | TATA box binding protein associated factor 1D; small nucleolar RNA, H/ACA box 8; small nucleolar RNA, H/ACA box 18; small nucleolar RNA, H/ACA box 40; small nucleolar RNA, H/ACA box 1; small nucleolar RNA, H/ACA box 25; small nucleolar RNA, H/ACA box 32; small nucleolar RNA, C/D box 5; microRNA 1304 |
| 1,02 | ACTL10                                                                                             | actin-like 10                                                                                                                                                                                                                                                                                                |

|      |                                    |                                                                                                                                                                 |
|------|------------------------------------|-----------------------------------------------------------------------------------------------------------------------------------------------------------------|
| 1,02 | PSMC2                              | proteasome 26S subunit, ATPase 2                                                                                                                                |
| 1,02 | UNK                                | unkempt family zinc finger                                                                                                                                      |
| 1,02 | DUSP1                              | dual specificity phosphatase 1                                                                                                                                  |
| 1,02 | MYO9B                              | myosin IXB                                                                                                                                                      |
| 1,02 | ND5                                | NADH dehydrogenase, subunit 5 (complex I)                                                                                                                       |
| 1,02 | DMTF1                              | cyclin D binding myb-like transcription factor 1                                                                                                                |
| 1,02 | TBC1D3L;<br>TBC1D3E                | TBC1 domain family, member 3L; TBC1 domain family, member 3E                                                                                                    |
| 1,02 | CRYZ                               | crystallin zeta                                                                                                                                                 |
| 1,02 | GABRA2                             | gamma-aminobutyric acid (GABA) A receptor, alpha 2                                                                                                              |
| 1,02 | RGPD5; RGPD8                       | RANBP2-like and GRIP domain containing 5;<br>RANBP2-like and GRIP domain containing 8                                                                           |
| 1,02 | CTAG1B                             | cancer/testis antigen 1B                                                                                                                                        |
| 1,02 | DCK                                | deoxycytidine kinase                                                                                                                                            |
| 1,02 | SMIM11A                            | small integral membrane protein 11A                                                                                                                             |
| 1,02 | ISL1                               | ISL LIM homeobox 1                                                                                                                                              |
| 1,02 | SCYL2                              | SCY1-like, kinase-like 2                                                                                                                                        |
| 1,02 | SCAF11                             | SR-related CTD-associated factor 11                                                                                                                             |
| 1,02 | APEX1                              | APEX nuclease (multifunctional DNA repair enzyme)<br>1                                                                                                          |
| 1,02 | RAB22A                             | RAB22A, member RAS oncogene family                                                                                                                              |
| 1,02 | VPS53;<br>RPS4XP17                 | vacuolar protein sorting 53 homolog (S. cerevisiae);<br>ribosomal protein S4X pseudogene 17                                                                     |
| 1,02 | LIPA                               | lipase A, lysosomal acid, cholesterol esterase                                                                                                                  |
| 1,02 | SSR1                               | signal sequence receptor, alpha                                                                                                                                 |
| 1,02 | STKLD1                             | serine/threonine kinase-like domain containing 1<br>[Source:HGNC Symbol;Acc:HGNC:28669]                                                                         |
| 1,02 | SAV1                               | salvador family WW domain containing protein 1                                                                                                                  |
| 1,02 | FGD4                               | FYVE, RhoGEF and PH domain containing 4                                                                                                                         |
| 1,02 | PTPN2                              | protein tyrosine phosphatase, non-receptor type 2                                                                                                               |
| 1,02 | OR7G1                              | olfactory receptor, family 7, subfamily G, member 1                                                                                                             |
| 1,02 | CAMTA1                             | calmodulin binding transcription activator 1                                                                                                                    |
| 1,02 | CCSER2                             | coiled-coil serine rich protein 2                                                                                                                               |
| 1,02 | LOC388813;<br>bafor;<br>AF165138.7 | uncharacterized protein ENSP00000383407-like;<br>Transcript Identified by AceView; HCG1818297;<br>Protein LOC388813<br>[Source:UniProtKB/TrEMBL;Acc:A0A087WSY0] |
| 1,02 | MOB4                               | MOB family member 4, phocein                                                                                                                                    |
| 1,02 | KCNK3                              | potassium channel, two pore domain subfamily K,<br>member 3                                                                                                     |
| 1,02 | G6PD                               | glucose-6-phosphate dehydrogenase                                                                                                                               |
| 1,02 | GLRB                               | glycine receptor beta                                                                                                                                           |
| 1,02 | ATP13A5                            | ATPase type 13A5                                                                                                                                                |
| 1,02 | SP2                                | Sp2 transcription factor                                                                                                                                        |
| 1,02 | EIF1                               | eukaryotic translation initiation factor 1                                                                                                                      |
| 1,02 | CRCP                               | CGRP receptor component                                                                                                                                         |
| 1,02 | RAPGEF2                            | Rap guanine nucleotide exchange factor 2                                                                                                                        |
| 1,02 | TIA1                               | TIA1 cytotoxic granule-associated RNA binding<br>protein                                                                                                        |

|      |                   |                                                                             |
|------|-------------------|-----------------------------------------------------------------------------|
| 1,02 | C14orf166         | chromosome 14 open reading frame 166                                        |
| 1,02 | FGF2              | fibroblast growth factor 2 (basic)                                          |
| 1,02 | ZNF99             | zinc finger protein 99                                                      |
| 1,02 | ATP2B3            | ATPase, Ca <sup>++</sup> transporting, plasma membrane 3                    |
| 1,02 | TIMM44            | translocase of inner mitochondrial membrane 44 homolog (yeast)              |
| 1,02 | QSOX1             | quiescin Q6 sulfhydryl oxidase 1                                            |
| 1,02 | NLRP13            | NLR family, pyrin domain containing 13                                      |
| 1,02 | ZNF321P           | zinc finger protein 321, pseudogene                                         |
| 1,02 | DBR1              | debranching RNA lariats 1                                                   |
| 1,02 | PACSIN3           | protein kinase C and casein kinase substrate in neurons 3                   |
| 1,02 | TIMM8B            | translocase of inner mitochondrial membrane 8 homolog B (yeast)             |
| 1,02 | CDH1              | cadherin 1, type 1                                                          |
| 1,02 | LY6G5B;<br>CSNK2B | lymphocyte antigen 6 complex, locus G5B; casein kinase 2, beta polypeptide  |
| 1,02 | CYSLTR1           | cysteinyl leukotriene receptor 1                                            |
| 1,02 | GNRH2             | gonadotropin releasing hormone 2                                            |
| 1,02 | SLC38A3           | solute carrier family 38, member 3                                          |
| 1,02 | HEYL              | Transcript Identified by AceView, Entrez Gene ID(s) 26508                   |
| 1,02 | IK; MIR3655       | IK cytokine, down-regulator of HLA II; microRNA 3655                        |
| 1,02 | CARNMT1           | carnosine N-methyltransferase 1                                             |
| 1,02 | FGD3              | FYVE, RhoGEF and PH domain containing 3                                     |
| 1,02 | MUL1              | mitochondrial E3 ubiquitin protein ligase 1                                 |
| 1,02 | ZNF317            | zinc finger protein 317                                                     |
| 1,02 | ELF1              | E74-like factor 1 (ets domain transcription factor)                         |
| 1,02 | C12orf71          | chromosome 12 open reading frame 71                                         |
| 1,02 | PGF               | placental growth factor                                                     |
| 1,02 | MGAT2             | mannosyl (alpha-1,6-)-glycoprotein beta-1,2-N-acetylglucosaminyltransferase |
| 1,02 | DDX60L            | DEAD (Asp-Glu-Ala-Asp) box polypeptide 60-like                              |
| 1,02 | HMBS              | hydroxymethylbilane synthase                                                |
| 1,02 | TPRXL             | tetra-peptide repeat homeobox-like                                          |
| 1,02 | RCC2              | regulator of chromosome condensation 2                                      |
| 1,02 | TSG101            | tumor susceptibility 101                                                    |
| 1,02 | MEPCE             | methylphosphate capping enzyme                                              |
| 1,02 | MRPS22            | mitochondrial ribosomal protein S22                                         |
| 1,02 | SRSF8             | serine/arginine-rich splicing factor 8                                      |
| 1,02 | COA7              | cytochrome c oxidase assembly factor 7 (putative)                           |
| 1,02 | NBEAL2            | neurobeachin like 2                                                         |
| 1,02 | DNAJC9            | DnaJ (Hsp40) homolog, subfamily C, member 9                                 |
| 1,02 | YBX3              | Y box binding protein 3                                                     |
| 1,02 | RPGRIPL           | RPGRIPL-like                                                                |
| 1,02 | NDNF              | neuron-derived neurotrophic factor                                          |
| 1,02 | EPN3              | epsin 3                                                                     |
| 1,02 | LKAAEAR1          | LKAAEAR motif containing 1                                                  |
| 1,02 | OR56B1            | olfactory receptor, family 56, subfamily B, member 1                        |

|      |                      |                                                                                       |
|------|----------------------|---------------------------------------------------------------------------------------|
| 1,02 | PMPCB                | peptidase (mitochondrial processing) beta                                             |
| 1,02 | ADNP2                | ADNP homeobox 2                                                                       |
| 1,02 | RAB11A               | RAB11A, member RAS oncogene family                                                    |
| 1,02 | DOCK6                | dedicator of cytokinesis 6                                                            |
| 1,02 | SPANXA1              | sperm protein associated with the nucleus, X-linked, family member A1                 |
| 1,02 | KCNIP2               | Kv channel interacting protein 2                                                      |
| 1,02 | LRFN3                | leucine rich repeat and fibronectin type III domain containing 3                      |
| 1,02 | CD48                 | CD48 molecule                                                                         |
| 1,02 | ANXA1                | annexin A1                                                                            |
| 1,02 | KMT5B                | lysine (K)-specific methyltransferase 5B                                              |
| 1,02 | SRPK3                | SRSF protein kinase 3                                                                 |
| 1,02 | HOXA2                | homeobox A2                                                                           |
| 1,02 | FUT1                 | fucosyltransferase 1 (galactoside 2-alpha-L-fucosyltransferase, H blood group)        |
| 1,02 | LEAP2                | liver expressed antimicrobial peptide 2                                               |
| 1,02 | BABAM1               | BRISC and BRCA1 A complex member 1                                                    |
| 1,02 | SERPINH1             | Jeck2013 ANTISENSE, coding, INTERNAL, intronic best transcript NM_001207014           |
| 1,02 | CPO                  | carboxypeptidase O                                                                    |
| 1,02 | ZBTB34               | zinc finger and BTB domain containing 34                                              |
| 1,02 | PAPD7                | PAP associated domain containing 7                                                    |
| 1,02 | U2AF1                | U2 small nuclear RNA auxiliary factor 1                                               |
| 1,02 | ULBP2                | UL16 binding protein 2                                                                |
| 1,02 | IFIH1                | interferon induced, with helicase C domain 1                                          |
| 1,02 | SOX12                | SRY box 12                                                                            |
| 1,02 | NUP98                | Transcript Identified by AceView, Entrez Gene ID(s) 4928                              |
| 1,02 | HOXA13               | homeobox A13                                                                          |
| 1,02 | PSMB6                | proteasome subunit beta 6                                                             |
| 1,02 | ALOXE3               | arachidonate lipoxygenase 3                                                           |
| 1,02 | MFN2                 | mitofusin 2                                                                           |
| 1,02 | PRSS21               | protease, serine, 21 (testisin)                                                       |
| 1,02 | YPEL1                | yippee like 1                                                                         |
| 1,02 | NXF5                 | nuclear RNA export factor 5                                                           |
| 1,02 | RPL23;<br>SNORA21    | ribosomal protein L23; small nucleolar RNA, H/ACA box 21                              |
| 1,02 | TRIM24               | tripartite motif containing 24                                                        |
| 1,02 | GCDH                 | glutaryl-CoA dehydrogenase                                                            |
| 1,02 | MFS11                | major facilitator superfamily domain containing 11                                    |
| 1,02 | TTYH3                | tweety family member 3                                                                |
| 1,02 | ND4L; ND4            | NADH dehydrogenase, subunit 4L (complex I); NADH dehydrogenase, subunit 4 (complex I) |
| 1,02 | LRRC16A              | leucine rich repeat containing 16A                                                    |
| 1,02 | CXorf49B;<br>CXorf49 | chromosome X open reading frame 49B; chromosome X open reading frame 49               |
| 1,02 | PEX5L                | peroxisomal biogenesis factor 5-like                                                  |
| 1,02 | MFF                  | mitochondrial fission factor                                                          |

|      |                    |                                                                                                            |
|------|--------------------|------------------------------------------------------------------------------------------------------------|
| 1,02 | LHPP               | phospholysine phosphohistidine inorganic pyrophosphate phosphatase                                         |
| 1,02 | PAQR6              | progesterone and adipoQ receptor family member VI                                                          |
| 1,02 | CFD                | complement factor D (adipsin)                                                                              |
| 1,02 | POPDC3             | popeye domain containing 3                                                                                 |
| 1,02 | BEAN1-AS1          | BEAN1 antisense RNA 1                                                                                      |
| 1,02 | GADD45B            | growth arrest and DNA-damage-inducible, beta                                                               |
| 1,02 | SATB2              | SATB homeobox 2                                                                                            |
| 1,02 | PAFAH1B3           | platelet-activating factor acetylhydrolase 1b, catalytic subunit 3 (29kDa)                                 |
| 1,02 | GFM1               | G elongation factor, mitochondrial 1                                                                       |
| 1,02 | HOXA4              | homeobox A4                                                                                                |
| 1,02 | HSD17B6            | hydroxysteroid (17-beta) dehydrogenase 6                                                                   |
| 1,02 | MSRB3              | methionine sulfoxide reductase B3                                                                          |
| 1,02 | PTH1R              | parathyroid hormone 1 receptor                                                                             |
| 1,02 | PHLDB1;<br>MIR6716 | pleckstrin homology-like domain, family B, member 1;<br>microRNA 6716                                      |
| 1,02 | RBM38              | RNA binding motif protein 38                                                                               |
| 1,02 | C5orf63            | chromosome 5 open reading frame 63                                                                         |
| 1,02 | RAP2B              | RAP2B, member of RAS oncogene family                                                                       |
| 1,02 | PTK2B              | protein tyrosine kinase 2 beta                                                                             |
| 1,02 | PPP1R14C           | protein phosphatase 1, regulatory (inhibitor) subunit 14C                                                  |
| 1,02 | R3HCC1             | R3H domain and coiled-coil containing 1                                                                    |
| 1,02 | AGFG1;<br>MIR5703  | ArfGAP with FG repeats 1; microRNA 5703                                                                    |
| 1,02 | ASAH2              | N-acylsphingosine amidohydrolase (non-lysosomal ceramidase) 2                                              |
| 1,02 | MINPP1             | multiple inositol-polyphosphate phosphatase 1                                                              |
| 1,02 | ADAMTSL5           | ADAMTS like 5                                                                                              |
| 1,02 | PPIG               | peptidylprolyl isomerase G (cyclophilin G)                                                                 |
| 1,02 | OSBPL8             | oxysterol binding protein-like 8                                                                           |
| 1,02 | GLUD1              | glutamate dehydrogenase 1                                                                                  |
| 1,02 | OR10J4             | olfactory receptor, family 10, subfamily J, member 4 (gene/pseudogene) [Source:HGNC Symbol;Acc:HGNC:15408] |
| 1,02 | CRCT1              | cysteine rich C-terminal 1                                                                                 |
| 1,02 | PSMG1              | proteasome (prosome, macropain) assembly chaperone 1                                                       |
| 1,02 | DCST2              | DC-STAMP domain containing 2                                                                               |
| 1,02 | SCAF4              | SR-related CTD-associated factor 4                                                                         |
| 1,02 | SLC13A4            | solute carrier family 13 (sodium/sulfate symporter), member 4                                              |
| 1,02 | NOP16              | NOP16 nucleolar protein                                                                                    |
| 1,02 | LINC01587          | long intergenic non-protein coding RNA 1587                                                                |
| 1,02 | KIAA2013           | KIAA2013                                                                                                   |
| 1,02 | C1orf146           | chromosome 1 open reading frame 146                                                                        |
| 1,02 | TAB3               | TGF-beta activated kinase 1/MAP3K7 binding protein 3                                                       |
| 1,02 | IFNA2              | interferon, alpha 2                                                                                        |

|      |                                   |                                                                                                                                                                                                                                                                                                                                               |
|------|-----------------------------------|-----------------------------------------------------------------------------------------------------------------------------------------------------------------------------------------------------------------------------------------------------------------------------------------------------------------------------------------------|
| 1,02 | TTC21B                            | tetratricopeptide repeat domain 21B                                                                                                                                                                                                                                                                                                           |
| 1,02 | BMP8A                             | bone morphogenetic protein 8a                                                                                                                                                                                                                                                                                                                 |
| 1,02 | WDR92                             | WD repeat domain 92                                                                                                                                                                                                                                                                                                                           |
| 1,02 | GATAD1                            | GATA zinc finger domain containing 1                                                                                                                                                                                                                                                                                                          |
| 1,02 | EBF3                              | early B-cell factor 3                                                                                                                                                                                                                                                                                                                         |
| 1,02 | IL5                               | interleukin 5                                                                                                                                                                                                                                                                                                                                 |
| 1,02 | KRT7                              | keratin 7, type II                                                                                                                                                                                                                                                                                                                            |
| 1,02 | C1QTNF1                           | C1q and tumor necrosis factor related protein 1                                                                                                                                                                                                                                                                                               |
| 1,02 | TNF                               | tumor necrosis factor                                                                                                                                                                                                                                                                                                                         |
| 1,02 | ZNF780A                           | zinc finger protein 780A                                                                                                                                                                                                                                                                                                                      |
| 1,02 | HPCA                              | hippocalcin                                                                                                                                                                                                                                                                                                                                   |
| 1,02 | PTCHD4                            | patched domain containing 4                                                                                                                                                                                                                                                                                                                   |
| 1,02 | MIPOL1                            | mirror-image polydactyly 1                                                                                                                                                                                                                                                                                                                    |
| 1,02 | FAM3C2                            | FAM3C pseudogene                                                                                                                                                                                                                                                                                                                              |
| 1,02 | CCR6                              | chemokine (C-C motif) receptor 6                                                                                                                                                                                                                                                                                                              |
| 1,02 | C1orf35                           | chromosome 1 open reading frame 35                                                                                                                                                                                                                                                                                                            |
| 1,02 | EPT1                              | ethanolaminephosphotransferase 1                                                                                                                                                                                                                                                                                                              |
| 1,02 | CTTNBP2NL                         | CTTNBP2 N-terminal like                                                                                                                                                                                                                                                                                                                       |
| 1,02 | GCSH                              | glycine cleavage system protein H (aminomethyl carrier)                                                                                                                                                                                                                                                                                       |
| 1,02 | DUOXA1                            | dual oxidase maturation factor 1                                                                                                                                                                                                                                                                                                              |
| 1,02 | PTTG1IP                           | pituitary tumor-transforming 1 interacting protein                                                                                                                                                                                                                                                                                            |
| 1,02 | WFIKKN2                           | WAP, follistatin/kazal, immunoglobulin, kunitz and netrin domain containing 2                                                                                                                                                                                                                                                                 |
| 1,02 | TP53I11                           | Memczak2013 ALT_ACCEPTOR, ALT_DONOR, coding, INTERNAL, intronic best transcript NM_001076787                                                                                                                                                                                                                                                  |
| 1,02 | CCDC92                            | coiled-coil domain containing 92                                                                                                                                                                                                                                                                                                              |
| 1,02 | RXRA                              | Memczak2013 ANTISENSE, CDS, coding, INTERNAL best transcript NM_002957                                                                                                                                                                                                                                                                        |
| 1,02 | PLS3                              | plastin 3                                                                                                                                                                                                                                                                                                                                     |
| 1,02 | PLG                               | plasminogen                                                                                                                                                                                                                                                                                                                                   |
| 1,02 | CACNA2D4                          | calcium channel, voltage-dependent, alpha 2/delta subunit 4                                                                                                                                                                                                                                                                                   |
| 1,02 | SHF                               | Src homology 2 domain containing F                                                                                                                                                                                                                                                                                                            |
| 1,02 | BNIP2                             | BCL2/adenovirus E1B 19kDa interacting protein 2                                                                                                                                                                                                                                                                                               |
| 1,02 | CLASP1                            | cytoplasmic linker associated protein 1                                                                                                                                                                                                                                                                                                       |
| 1,02 | SCAND2P                           | SCAN domain containing 2 pseudogene                                                                                                                                                                                                                                                                                                           |
| 1,02 | LUZP4                             | leucine zipper protein 4                                                                                                                                                                                                                                                                                                                      |
| 1,02 | AHSA2                             | AHA1, activator of heat shock 90kDa protein ATPase homolog 2 (yeast)                                                                                                                                                                                                                                                                          |
| 1,02 | P2RY14                            | purinergic receptor P2Y, G-protein coupled, 14                                                                                                                                                                                                                                                                                                |
| 1,02 | TMEM252                           | transmembrane protein 252                                                                                                                                                                                                                                                                                                                     |
| 1,02 | CXorf51A;<br>CXorf51B;<br>CXorf51 | Homo sapiens chromosome X open reading frame 51A (CXorf51A), mRNA.; Homo sapiens chromosome X open reading frame 51B (CXorf51B), mRNA.; Transcript Identified by AceView, Entrez Gene ID(s) 100129239, RefSeq ID(s) NM_001144064; chromosome X open reading frame 51A [Source:HGNC Symbol;Acc:HGNC:30533]; chromosome X open reading frame 51 |

|      |           |                                                                                           |
|------|-----------|-------------------------------------------------------------------------------------------|
| 1,02 | TNFRSF10D | tumor necrosis factor receptor superfamily, member 10d, decoy with truncated death domain |
| 1,02 | POGK      | pogo transposable element with KRAB domain                                                |
| 1,02 | SPCS3     | signal peptidase complex subunit 3                                                        |
| 1,02 | NDUFC1    | NADH dehydrogenase (ubiquinone) 1, subcomplex unknown, 1, 6kDa                            |
| 1,02 | STAG3L4   | stromal antigen 3-like 4 (pseudogene)                                                     |
| 1,02 | UCHL5     | ubiquitin C-terminal hydrolase L5                                                         |
| 1,02 | EFR3A     | EFR3 homolog A                                                                            |
| 1,02 | RRP1B     | ribosomal RNA processing 1B                                                               |
| 1,02 | CCDC17    | coiled-coil domain containing 17                                                          |
| 1,02 | RPIA      | ribose 5-phosphate isomerase A                                                            |
| 1,02 | ADO       | 2-aminoethanethiol (cysteamine) dioxygenase                                               |
| 1,02 | GTF2H4    | general transcription factor IIH subunit 4                                                |
| 1,02 | C19orf70  | chromosome 19 open reading frame 70                                                       |
| 1,02 | TMPRSS13  | transmembrane protease, serine 13                                                         |
| 1,02 | DEGS1     | delta(4)-desaturase, sphingolipid 1                                                       |
| 1,02 | COPB1     | coatamer protein complex subunit beta 1                                                   |
| 1,02 | SHANK1    | SH3 and multiple ankyrin repeat domains 1                                                 |
| 1,02 | ZYX       | zyxin                                                                                     |
| 1,02 | UPK3A     | uroplakin 3A                                                                              |
| 1,02 | TPX2      | TPX2, microtubule-associated                                                              |
| 1,02 | CALU      | calumenin                                                                                 |
| 1,02 | SCOC      | short coiled-coil protein                                                                 |
| 1,02 | KLF11     | Kruppel-like factor 11                                                                    |
| 1,02 | TMIGD1    | transmembrane and immunoglobulin domain containing 1                                      |
| 1,02 | PLA2G2E   | phospholipase A2, group IIE                                                               |
| 1,02 | ADORA2A   | adenosine A2a receptor                                                                    |
| 1,02 | SPATA31D1 | SPATA31 subfamily D, member 1                                                             |
| 1,02 | P2RX1     | purinergic receptor P2X, ligand gated ion channel, 1                                      |
| 1,02 | AGAP6     | ArfGAP with GTPase domain, ankyrin repeat and PH domain 6                                 |
| 1,02 | PADI1     | peptidyl arginine deiminase, type I                                                       |
| 1,02 | POTEB3    | POTE ankyrin domain family, member B3                                                     |
| 1,02 | MARK2     | MAP/microtubule affinity-regulating kinase 2                                              |
| 1,02 | CCL22     | chemokine (C-C motif) ligand 22                                                           |
| 1,02 | WSB1      | WD repeat and SOCS box containing 1                                                       |
| 1,02 | TTC24     | tetratricopeptide repeat domain 24                                                        |
| 1,02 | AATF      | apoptosis antagonizing transcription factor                                               |
| 1,02 | ADA       | adenosine deaminase                                                                       |
| 1,02 | EPB41L1   | erythrocyte membrane protein band 4.1-like 1                                              |
| 1,02 | INCA1     | inhibitor of CDK, cyclin A1 interacting protein 1                                         |
| 1,02 | KIAA0196  | KIAA0196                                                                                  |

|      |                                           |                                                                                                                                                                                                                                                                                                                                                                                           |
|------|-------------------------------------------|-------------------------------------------------------------------------------------------------------------------------------------------------------------------------------------------------------------------------------------------------------------------------------------------------------------------------------------------------------------------------------------------|
| 1,02 | LOC388242;<br>LOC613038;<br>RP11-347C12.3 | Homo sapiens coiled-coil domain containing 101 pseudogene (LOC388242), non-coding RNA.; Homo sapiens SAGA complex associated factor 29 pseudogene (LOC613038), non-coding RNA.; Transcript Identified by AceView, Entrez Gene ID(s) 613038, RefSeq ID(s) NR_002557; Transcript Identified by AceView, Entrez Gene ID(s) 613038; Protein LOC101929849 [Source:UniProtKB/TrEMBL;Acc:H0YHN6] |
| 1,02 | FAM199X                                   | family with sequence similarity 199, X-linked                                                                                                                                                                                                                                                                                                                                             |
| 1,02 | FBLN2                                     | fibulin 2                                                                                                                                                                                                                                                                                                                                                                                 |
| 1,02 | ZC3H18                                    | zinc finger CCCH-type containing 18                                                                                                                                                                                                                                                                                                                                                       |
| 1,02 | INPP5D                                    | inositol polyphosphate-5-phosphatase D                                                                                                                                                                                                                                                                                                                                                    |
| 1,02 | PDLIM2                                    | PDZ and LIM domain 2 (mystique)                                                                                                                                                                                                                                                                                                                                                           |
| 1,02 | GNB5                                      | guanine nucleotide binding protein (G protein), beta 5                                                                                                                                                                                                                                                                                                                                    |
| 1,02 | TRIM11;<br>MIR6742                        | tripartite motif containing 11; microRNA 6742                                                                                                                                                                                                                                                                                                                                             |
| 1,02 | EID2                                      | EP300 interacting inhibitor of differentiation 2                                                                                                                                                                                                                                                                                                                                          |
| 1,02 | SPG7                                      | spastic paraplegia 7 (pure and complicated autosomal recessive)                                                                                                                                                                                                                                                                                                                           |
| 1,02 | FAM49B                                    | family with sequence similarity 49, member B                                                                                                                                                                                                                                                                                                                                              |
| 1,02 | EPHA10                                    | EPH receptor A10                                                                                                                                                                                                                                                                                                                                                                          |
| 1,02 | CTTN                                      | cortactin                                                                                                                                                                                                                                                                                                                                                                                 |
| 1,02 | PFKFB1                                    | 6-phosphofructo-2-kinase/fructose-2,6-biphosphatase 1                                                                                                                                                                                                                                                                                                                                     |
| 1,02 | MOCS3                                     | molybdenum cofactor synthesis 3                                                                                                                                                                                                                                                                                                                                                           |
| 1,02 | SLC3A2                                    | solute carrier family 3 (amino acid transporter heavy chain), member 2                                                                                                                                                                                                                                                                                                                    |
| 1,02 | GOLGA8T                                   | golgin A8 family, member T                                                                                                                                                                                                                                                                                                                                                                |
| 1,01 | NUP107                                    | nucleoporin 107kDa                                                                                                                                                                                                                                                                                                                                                                        |
| 1,01 | UBA3                                      | ubiquitin-like modifier activating enzyme 3                                                                                                                                                                                                                                                                                                                                               |
| 1,01 | OR1D5                                     | olfactory receptor, family 1, subfamily D, member 5                                                                                                                                                                                                                                                                                                                                       |
| 1,01 | PDE12                                     | phosphodiesterase 12                                                                                                                                                                                                                                                                                                                                                                      |
| 1,01 | LTV1                                      | LTV1 ribosome biogenesis factor                                                                                                                                                                                                                                                                                                                                                           |
| 1,01 | RPS24                                     | ribosomal protein S24                                                                                                                                                                                                                                                                                                                                                                     |
| 1,01 | LIN9                                      | lin-9 DREAM MuvB core complex component                                                                                                                                                                                                                                                                                                                                                   |
| 1,01 | MILR1                                     | mast cell immunoglobulin-like receptor 1                                                                                                                                                                                                                                                                                                                                                  |
| 1,01 | TGIF2LY                                   | TGFB-induced factor homeobox 2-like, Y-linked                                                                                                                                                                                                                                                                                                                                             |
| 1,01 | HS3ST3A1                                  | Jeck2013 ALT_ACCEPTOR, ALT_DONOR, coding, INTERNAL, intronic best transcript NM_006042                                                                                                                                                                                                                                                                                                    |
| 1,01 | KDM1A;<br>MIR3115                         | lysine (K)-specific demethylase 1A; microRNA 3115                                                                                                                                                                                                                                                                                                                                         |
| 1,01 | WHSC1                                     | Wolf-Hirschhorn syndrome candidate 1                                                                                                                                                                                                                                                                                                                                                      |
| 1,01 | SRRM2                                     | serine/arginine repetitive matrix 2                                                                                                                                                                                                                                                                                                                                                       |
| 1,01 | STAM2                                     | signal transducing adaptor molecule (SH3 domain and ITAM motif) 2                                                                                                                                                                                                                                                                                                                         |
| 1,01 | STX6                                      | syntaxin 6                                                                                                                                                                                                                                                                                                                                                                                |
| 1,01 | RNF8                                      | ring finger protein 8, E3 ubiquitin protein ligase                                                                                                                                                                                                                                                                                                                                        |
| 1,01 | ASPA                                      | aspartoacylase                                                                                                                                                                                                                                                                                                                                                                            |
| 1,01 | PGGT1B                                    | protein geranylgeranyltransferase type I, beta subunit                                                                                                                                                                                                                                                                                                                                    |

|      |                                |                                                                                                            |
|------|--------------------------------|------------------------------------------------------------------------------------------------------------|
| 1,01 | APPBP2                         | amyloid beta precursor protein (cytoplasmic tail) binding protein 2                                        |
| 1,01 | CKAP2                          | cytoskeleton associated protein 2                                                                          |
| 1,01 | ALOX12B                        | arachidonate 12-lipoxygenase, 12R type                                                                     |
| 1,01 | FAM65A                         | family with sequence similarity 65, member A                                                               |
| 1,01 | USP42                          | ubiquitin specific peptidase 42                                                                            |
| 1,01 | DMP1                           | dentin matrix acidic phosphoprotein 1                                                                      |
| 1,01 | TMEM68                         | transmembrane protein 68                                                                                   |
| 1,01 | MED10                          | mediator complex subunit 10                                                                                |
| 1,01 | HDAC1                          | histone deacetylase 1                                                                                      |
| 1,01 | ZMYM1                          | zinc finger, MYM-type 1                                                                                    |
| 1,01 | B9D2                           | B9 protein domain 2                                                                                        |
| 1,01 | RPGRIP1                        | retinitis pigmentosa GTPase regulator interacting protein 1                                                |
| 1,01 | FAM193B                        | family with sequence similarity 193, member B                                                              |
| 1,01 | EPC2                           | enhancer of polycomb homolog 2 (Drosophila)                                                                |
| 1,01 | MX1                            | MX dynamin-like GTPase 1                                                                                   |
| 1,01 | CEP63                          | centrosomal protein 63kDa                                                                                  |
| 1,01 | HIST3H2BB                      | histone cluster 3, H2bb                                                                                    |
| 1,01 | MCF2L                          | MCF.2 cell line derived transforming sequence like                                                         |
| 1,01 | SLC39A6                        | solute carrier family 39 (zinc transporter), member 6                                                      |
| 1,01 | TUSC1                          | tumor suppressor candidate 1                                                                               |
| 1,01 | RAD21; MIR3610                 | RAD21 cohesin complex component; microRNA 3610                                                             |
| 1,01 | ANKH                           | ANKH inorganic pyrophosphate transport regulator                                                           |
| 1,01 | PLCB1                          | Memczak2013 ANTISENSE, coding, INTERNAL, intronic best transcript NM_182734                                |
| 1,01 | NPBWR2                         | neuropeptides B/W receptor 2                                                                               |
| 1,01 | ZNF611                         | zinc finger protein 611                                                                                    |
| 1,01 | CAPN7                          | calpain 7                                                                                                  |
| 1,01 | ANKRD11                        | ankyrin repeat domain 11                                                                                   |
| 1,01 | RXFP1                          | relaxin/insulin-like family peptide receptor 1                                                             |
| 1,01 | SRSF6                          | serine/arginine-rich splicing factor 6                                                                     |
| 1,01 | PIDD1                          | p53-induced death domain protein 1                                                                         |
| 1,01 | DMRTB1                         | DMRT-like family B with proline-rich C-terminal, 1                                                         |
| 1,01 | UQCRB                          | ubiquinol-cytochrome c reductase binding protein                                                           |
| 1,01 | USP24                          | Transcript Identified by AceView, Entrez Gene ID(s) 23358                                                  |
| 1,01 | SRSF5                          | serine/arginine-rich splicing factor 5                                                                     |
| 1,01 | OR4C12                         | olfactory receptor, family 4, subfamily C, member 12                                                       |
| 1,01 | ST7; ST7-OT4; ST7-OT3; MIR6132 | suppression of tumorigenicity 7; ST7 overlapping transcript 4; ST7 overlapping transcript 3; microRNA 6132 |
| 1,01 | MASP2                          | mannan-binding lectin serine peptidase 2                                                                   |
| 1,01 | PGAP3                          | post-GPI attachment to proteins 3                                                                          |
| 1,01 | PSMA5                          | proteasome subunit alpha 5                                                                                 |
| 1,01 | G6PC2                          | glucose-6-phosphatase, catalytic, 2                                                                        |
| 1,01 | HOXA6                          | homeobox A6                                                                                                |
| 1,01 | GCFC2                          | GC-rich sequence DNA-binding factor 2                                                                      |
| 1,01 | SAR1B                          | secretion associated, Ras related GTPase 1B                                                                |

|      |                      |                                                                                           |
|------|----------------------|-------------------------------------------------------------------------------------------|
| 1,01 | GOLT1B               | golgi transport 1B                                                                        |
| 1,01 | INTS8                | integrator complex subunit 8                                                              |
| 1,01 | PRKACB               | protein kinase, cAMP-dependent, catalytic, beta                                           |
| 1,01 | MYF5                 | myogenic factor 5                                                                         |
| 1,01 | KCTD11               | potassium channel tetramerization domain containing 11                                    |
| 1,01 | VN1R5                | vomeroneural 1 receptor 5 (gene/pseudogene)                                               |
| 1,01 | CIITA                | class II, major histocompatibility complex, transactivator                                |
| 1,01 | CDC26                | cell division cycle 26                                                                    |
| 1,01 | RPL7A                | ribosomal protein L7a                                                                     |
| 1,01 | S100A9               | S100 calcium binding protein A9                                                           |
| 1,01 | PHB                  | prohibitin                                                                                |
| 1,01 | BAG3                 | BCL2-associated athanogene 3                                                              |
| 1,01 | LDHB                 | lactate dehydrogenase B                                                                   |
| 1,01 | GSG1                 | germ cell associated 1                                                                    |
| 1,01 | ANO10                | anoctamin 10                                                                              |
| 1,01 | EBNA1BP2;<br>MIR6733 | EBNA1 binding protein 2; microRNA 6733                                                    |
| 1,01 | ATP1B1               | ATPase, Na <sup>+</sup> /K <sup>+</sup> transporting, beta 1 polypeptide                  |
| 1,01 | SNX8; MIR6836        | sorting nexin 8; microRNA 6836                                                            |
| 1,01 | RNF149               | ring finger protein 149                                                                   |
| 1,01 | PUS3                 | pseudouridylate synthase 3                                                                |
| 1,01 | GTF2I                | general transcription factor Ii                                                           |
| 1,01 | TEX101               | testis expressed 101                                                                      |
| 1,01 | APRT                 | adenine phosphoribosyltransferase                                                         |
| 1,01 | SNAP23               | synaptosome associated protein 23kDa                                                      |
| 1,01 | SOX6; MIR6073        | SRY box 6; microRNA 6073                                                                  |
| 1,01 | VAPA                 | Memczak2013 ALT_ACCEPTOR, ALT_DONOR, coding, INTERNAL, intronic best transcript NM_003574 |
| 1,01 | RNF183               | ring finger protein 183                                                                   |
| 1,01 | RTP4                 | receptor (chemosensory) transporter protein 4                                             |
| 1,01 | RANBP2               | RAN binding protein 2                                                                     |
| 1,01 | MAN2C1               | mannosidase, alpha, class 2C, member 1                                                    |
| 1,01 | BROX                 | BRO1 domain and CAAX motif containing                                                     |
| 1,01 | EXOSC3               | exosome component 3                                                                       |
| 1,01 | HIST1H2BH            | histone cluster 1, H2bh                                                                   |
| 1,01 | ZNF354B              | zinc finger protein 354B                                                                  |
| 1,01 | ANP32E               | acidic nuclear phosphoprotein 32 family member E                                          |
| 1,01 | SNRPC                | small nuclear ribonucleoprotein polypeptide C                                             |
| 1,01 | MPP7                 | membrane protein, palmitoylated 7                                                         |
| 1,01 | TRAPPC6A             | trafficking protein particle complex 6A                                                   |
| 1,01 | TTI1                 | TELO2 interacting protein 1                                                               |
| 1,01 | C10orf2              | chromosome 10 open reading frame 2                                                        |
| 1,01 | PIGC                 | phosphatidylinositol glycan anchor biosynthesis class C                                   |
| 1,01 | FUT2                 | fucosyltransferase 2 (secretor status included)                                           |
| 1,01 | RBBP5                | retinoblastoma binding protein 5                                                          |
| 1,01 | SYAP1                | synapse associated protein 1                                                              |

|      |                         |                                                                         |
|------|-------------------------|-------------------------------------------------------------------------|
| 1,01 | SGTA                    | small glutamine-rich tetratricopeptide repeat (TPR)-containing, alpha   |
| 1,01 | MAOA                    | monoamine oxidase A                                                     |
| 1,01 | SLC25A33                | solute carrier family 25 (pyrimidine nucleotide carrier), member 33     |
| 1,01 | ACOX3                   | acyl-CoA oxidase 3, pristanoyl                                          |
| 1,01 | TRIM71                  | tripartite motif containing 71, E3 ubiquitin protein ligase             |
| 1,01 | GPBP1                   | GC-rich promoter binding protein 1                                      |
| 1,01 | ZSWIM6                  | zinc finger, SWIM-type containing 6                                     |
| 1,01 | FAM71F2                 | family with sequence similarity 71, member F2                           |
| 1,01 | CTSE                    | cathepsin E                                                             |
| 1,01 | FBXO27                  | F-box protein 27                                                        |
| 1,01 | RCC2                    | regulator of chromosome condensation 2                                  |
| 1,01 | NSUN4                   | NOP2/Sun domain family, member 4                                        |
| 1,01 | BEX4                    | brain expressed X-linked 4                                              |
| 1,01 | COLEC10                 | collectin sub-family member 10 (C-type lectin)                          |
| 1,01 | DYSF                    | dysferlin                                                               |
| 1,01 | CTPS2                   | CTP synthase 2                                                          |
| 1,01 | TNFAIP3                 | tumor necrosis factor, alpha-induced protein 3                          |
| 1,01 | GIN3                    | GIN3 complex subunit 3 (Psf3 homolog)                                   |
| 1,01 | DNAJC3                  | DnaJ (Hsp40) homolog, subfamily C, member 3                             |
| 1,01 | IGLL1                   | immunoglobulin lambda-like polypeptide 1                                |
| 1,01 | ATP6V1G2-DDX39B         | ATP6V1G2-DDX39B readthrough (NMD candidate)                             |
| 1,01 | RERG                    | RAS-like, estrogen-regulated, growth inhibitor                          |
| 1,01 | ADAP1                   | ArfGAP with dual PH domains 1                                           |
| 1,01 | GBP3                    | guanylate binding protein 3                                             |
| 1,01 | POP1                    | POP1 homolog, ribonuclease P/MRP subunit                                |
| 1,01 | C3orf79                 | chromosome 3 open reading frame 79                                      |
| 1,01 | ADAMTS13                | ADAM metalloproteinase with thrombospondin type 1 motif 13              |
| 1,01 | RGAG4                   | retrotransposon gag domain containing 4                                 |
| 1,01 | HPN-AS1                 | HPN antisense RNA 1                                                     |
| 1,01 | AIDA                    | axin interactor, dorsalization associated                               |
| 1,01 | GRIFIN                  | galectin-related inter-fiber protein                                    |
| 1,01 | RPS19BP1                | ribosomal protein S19 binding protein 1                                 |
| 1,01 | DNAAF5                  | dynein, axonemal, assembly factor 5                                     |
| 1,01 | GRK4                    | G protein-coupled receptor kinase 4                                     |
| 1,01 | RFFL                    | ring finger and FYVE-like domain containing E3 ubiquitin protein ligase |
| 1,01 | BIVM-ERCC5              | BIVM-ERCC5 readthrough                                                  |
| 1,01 | LOC729970; RP4-639F20.1 | hCG2028352-like; novel transcript                                       |
| 1,01 | DYRK1B                  | dual specificity tyrosine-(Y)-phosphorylation regulated kinase 1B       |
| 1,01 | N4BP1                   | NEDD4 binding protein 1                                                 |
| 1,01 | CPB2                    | carboxypeptidase B2 (plasma)                                            |
| 1,01 | RAB29                   | RAB29, member RAS oncogene family                                       |
| 1,01 | TMEM167B                | transmembrane protein 167B                                              |

|      |                      |                                                                                                                                                               |
|------|----------------------|---------------------------------------------------------------------------------------------------------------------------------------------------------------|
| 1,01 | LOC400927;<br>CSNK1E | TPTE and PTEN homologous inositol lipid phosphatase pseudogene; Transcript Identified by AceView, Entrez Gene ID(s) 1454; 400927                              |
| 1,01 | ZNF699               | zinc finger protein 699                                                                                                                                       |
| 1,01 | SS18L1               | synovial sarcoma translocation gene on chromosome 18-like 1                                                                                                   |
| 1,01 | SGK3; C8orf44-SGK3   | serum/glucocorticoid regulated kinase family, member 3; C8orf44-SGK3 readthrough                                                                              |
| 1,01 | TBX4                 | T-box 4                                                                                                                                                       |
| 1,01 | DNAJC7               | DnaJ (Hsp40) homolog, subfamily C, member 7                                                                                                                   |
| 1,01 | CABIN1               | calcineurin binding protein 1                                                                                                                                 |
| 1,01 | BOD1                 | biorientation of chromosomes in cell division 1                                                                                                               |
| 1,01 | SLC25A48             | solute carrier family 25, member 48                                                                                                                           |
| 1,01 | RPS17                | ribosomal protein S17                                                                                                                                         |
| 1,01 | SUPT20H              | SPT20 homolog, SAGA complex component                                                                                                                         |
| 1,01 | MUT                  | methylmalonyl-CoA mutase                                                                                                                                      |
| 1,01 | RPL32;<br>SNORA7A    | ribosomal protein L32; small nucleolar RNA, H/ACA box 7A                                                                                                      |
| 1,01 | GTF2H2               | general transcription factor IIH subunit 2                                                                                                                    |
| 1,01 | CRYBB1               | crystallin beta B1                                                                                                                                            |
| 1,01 | SH2D1B               | SH2 domain containing 1B                                                                                                                                      |
| 1,01 | ELAVL1               | ELAV like RNA binding protein 1                                                                                                                               |
| 1,01 | ZNF705D              | zinc finger protein 705D                                                                                                                                      |
| 1,01 | GLI4                 | GLI family zinc finger 4                                                                                                                                      |
| 1,01 | FAM69C               | family with sequence similarity 69, member C                                                                                                                  |
| 1,01 | DHRS7B               | dehydrogenase/reductase (SDR family) member 7B                                                                                                                |
| 1,01 | MRAP2                | melanocortin 2 receptor accessory protein 2                                                                                                                   |
| 1,01 | FHAD1                | forkhead-associated (FHA) phosphopeptide binding domain 1                                                                                                     |
| 1,01 | SFTPD                | surfactant protein D                                                                                                                                          |
| 1,01 | LYNX1                | Ly6/neurotoxin 1                                                                                                                                              |
| 1,01 | TES                  | testin LIM domain protein                                                                                                                                     |
| 1,01 | IL15RA               | interleukin 15 receptor, alpha                                                                                                                                |
| 1,01 | MCPH1                | microcephalin 1                                                                                                                                               |
| 1,01 | SEN5P                | SUMO1/sentrin specific peptidase 5                                                                                                                            |
| 1,01 | AK2                  | adenylate kinase 2                                                                                                                                            |
| 1,01 | SOAT2                | sterol O-acyltransferase 2                                                                                                                                    |
| 1,01 | RPS27L               | ribosomal protein S27-like                                                                                                                                    |
| 1,01 | CRLF3                | cytokine receptor-like factor 3                                                                                                                               |
| 1,01 | ARAP3                | ArfGAP with RhoGAP domain, ankyrin repeat and PH domain 3                                                                                                     |
| 1,01 | ABO                  | ABO blood group (transferase A, alpha 1-3-N-acetylgalactosaminyltransferase; transferase B, alpha 1-3-galactosyltransferase) [Source:HGNC Symbol;Acc:HGNC:79] |
| 1,01 | PPM1B                | Memczak2013 ANTISENSE, coding, INTERNAL, intronic best transcript NM_001033556                                                                                |
| 1,01 | RPL10;<br>SNORA70    | ribosomal protein L10; small nucleolar RNA, H/ACA box 70                                                                                                      |
| 1,01 | FBL                  | fibrillarin                                                                                                                                                   |

|      |                     |                                                                                              |
|------|---------------------|----------------------------------------------------------------------------------------------|
| 1,01 | H2AFZ               | H2A histone family, member Z                                                                 |
| 1,01 | DYM                 | dymeclin                                                                                     |
| 1,01 | PKP4                | Transcript Identified by AceView, Entrez Gene ID(s)<br>8502                                  |
| 1,01 | GCHFR               | GTP cyclohydrolase I feedback regulator                                                      |
| 1,01 | RAP1B               | RAP1B, member of RAS oncogene family                                                         |
| 1,01 | BCAS2               | breast carcinoma amplified sequence 2                                                        |
| 1,01 | ZNF532              | zinc finger protein 532                                                                      |
| 1,01 | LPAR2               | lysophosphatidic acid receptor 2                                                             |
| 1,01 | RPL37A              | ribosomal protein L37a                                                                       |
| 1,01 | TCP11L2             | t-complex 11, testis-specific-like 2                                                         |
| 1,01 | CCDC39              | coiled-coil domain containing 39                                                             |
| 1,01 | YBX1                | Y box binding protein 1                                                                      |
| 1,01 | NMT1                | N-myristoyltransferase 1                                                                     |
| 1,01 | TCHP                | trichoplein, keratin filament binding                                                        |
| 1,01 | RPL22               | ribosomal protein L22                                                                        |
| 1,01 | GPC5                | glypican 5                                                                                   |
| 1,01 | RHOBTB1             | Rho-related BTB domain containing 1                                                          |
| 1,01 | CPTP                | ceramide-1-phosphate transfer protein                                                        |
| 1,01 | CDH24               | cadherin 24, type 2                                                                          |
| 1,01 | FAM234A;<br>ARHGDIG | family with sequence similarity 234, member A; Rho<br>GDP dissociation inhibitor (GDI) gamma |
| 1,01 | RGS7BP              | regulator of G-protein signaling 7 binding protein                                           |
| 1,01 | CSTB                | cystatin B (stefin B)                                                                        |
| 1,01 | CDC42               | Transcript Identified by AceView, Entrez Gene ID(s)<br>998                                   |
| 1,01 | FGR                 | FGR proto-oncogene, Src family tyrosine kinase                                               |
| 1,01 | KDM1B               | lysine (K)-specific demethylase 1B                                                           |
| 1,01 | NR2C1               | nuclear receptor subfamily 2, group C, member 1                                              |
| 1,01 | LAMTOR2             | late endosomal/lysosomal adaptor, MAPK and MTOR<br>activator 2                               |
| 1,01 | C11orf98;<br>LBHD1  | chromosome 11 open reading frame 98; LBH domain<br>containing 1                              |
| 1,01 | HMGN1               | high mobility group nucleosome binding domain 1                                              |
| 1,01 | GEM                 | GTP binding protein overexpressed in skeletal muscle                                         |
| 1,01 | QPRT                | quinolinate phosphoribosyltransferase                                                        |
| 1,01 | PTK2                | Transcript Identified by AceView, Entrez Gene ID(s)<br>5747                                  |
| 1,01 | DYNC1LI2            | dynein, cytoplasmic 1, light intermediate chain 2                                            |
| 1,01 | OR4A5               | olfactory receptor, family 4, subfamily A, member 5                                          |
| 1,01 | BRF1                | BRF1, RNA polymerase III transcription initiation<br>factor 90 kDa subunit                   |
| 1,01 | UBASH3B             | ubiquitin associated and SH3 domain containing B                                             |
| 1,01 | SCGB2B2             | secretoglobin, family 2B, member 2                                                           |
| 1,01 | GNAI1               | guanine nucleotide binding protein (G protein), alpha<br>inhibiting activity polypeptide 1   |
| 1,01 | KDSR                | 3-ketodihydrosphingosine reductase                                                           |
| 1,01 | PDIA4               | protein disulfide isomerase family A, member 4                                               |
| 1,01 | TBRG1               | transforming growth factor beta regulator 1                                                  |

|      |           |                                                                                                                                                                                                                                                                                                                                                                                                                                                                                                                                                                                                                                                                                                                                                                                                                            |
|------|-----------|----------------------------------------------------------------------------------------------------------------------------------------------------------------------------------------------------------------------------------------------------------------------------------------------------------------------------------------------------------------------------------------------------------------------------------------------------------------------------------------------------------------------------------------------------------------------------------------------------------------------------------------------------------------------------------------------------------------------------------------------------------------------------------------------------------------------------|
| 1,01 | CNOT8     | CCR4-NOT transcription complex subunit 8                                                                                                                                                                                                                                                                                                                                                                                                                                                                                                                                                                                                                                                                                                                                                                                   |
| 1,01 | LIN7B     | lin-7 homolog B (C. elegans)                                                                                                                                                                                                                                                                                                                                                                                                                                                                                                                                                                                                                                                                                                                                                                                               |
| 1,01 | SPOCK3    | sparc/osteonectin, cwcv and kazal-like domains<br>proteoglycan (testican) 3                                                                                                                                                                                                                                                                                                                                                                                                                                                                                                                                                                                                                                                                                                                                                |
| 1,01 | HIST1H2AC | histone cluster 1, H2ac                                                                                                                                                                                                                                                                                                                                                                                                                                                                                                                                                                                                                                                                                                                                                                                                    |
| 1,01 | PSMD7     | proteasome 26S subunit, non-ATPase 7                                                                                                                                                                                                                                                                                                                                                                                                                                                                                                                                                                                                                                                                                                                                                                                       |
| 1,01 | CDCA8     | cell division cycle associated 8                                                                                                                                                                                                                                                                                                                                                                                                                                                                                                                                                                                                                                                                                                                                                                                           |
| 1,01 | ACSM3     | acyl-CoA synthetase medium-chain family member 3                                                                                                                                                                                                                                                                                                                                                                                                                                                                                                                                                                                                                                                                                                                                                                           |
| 1,01 | CNPY3     | canopy FGF signaling regulator 3                                                                                                                                                                                                                                                                                                                                                                                                                                                                                                                                                                                                                                                                                                                                                                                           |
| 1,01 | ORMDL1    | ORMDL sphingolipid biosynthesis regulator 1                                                                                                                                                                                                                                                                                                                                                                                                                                                                                                                                                                                                                                                                                                                                                                                |
| 1,01 | TMEM176B  | transmembrane protein 176B                                                                                                                                                                                                                                                                                                                                                                                                                                                                                                                                                                                                                                                                                                                                                                                                 |
| 1,01 | RHOT2     | ras homolog family member T2                                                                                                                                                                                                                                                                                                                                                                                                                                                                                                                                                                                                                                                                                                                                                                                               |
| 1,01 | SIGLEC6   | sialic acid binding Ig-like lectin 6                                                                                                                                                                                                                                                                                                                                                                                                                                                                                                                                                                                                                                                                                                                                                                                       |
| 1,01 | DOK7      | docking protein 7                                                                                                                                                                                                                                                                                                                                                                                                                                                                                                                                                                                                                                                                                                                                                                                                          |
| 1,01 | FAM60A    | family with sequence similarity 60, member A                                                                                                                                                                                                                                                                                                                                                                                                                                                                                                                                                                                                                                                                                                                                                                               |
| 1,01 | MED15     | mediator complex subunit 15                                                                                                                                                                                                                                                                                                                                                                                                                                                                                                                                                                                                                                                                                                                                                                                                |
| 1,01 | VEGFB     | vascular endothelial growth factor B                                                                                                                                                                                                                                                                                                                                                                                                                                                                                                                                                                                                                                                                                                                                                                                       |
| 1,01 | CXCL6     | chemokine (C-X-C motif) ligand 6                                                                                                                                                                                                                                                                                                                                                                                                                                                                                                                                                                                                                                                                                                                                                                                           |
| 1,01 | MCTS1     | malignant T-cell amplified sequence 1                                                                                                                                                                                                                                                                                                                                                                                                                                                                                                                                                                                                                                                                                                                                                                                      |
| 1,01 | CTSO      | cathepsin O                                                                                                                                                                                                                                                                                                                                                                                                                                                                                                                                                                                                                                                                                                                                                                                                                |
| 1,01 | SPC24     | SPC24, NDC80 kinetochore complex component                                                                                                                                                                                                                                                                                                                                                                                                                                                                                                                                                                                                                                                                                                                                                                                 |
| 1,01 | SF3A2     | splicing factor 3a subunit 2                                                                                                                                                                                                                                                                                                                                                                                                                                                                                                                                                                                                                                                                                                                                                                                               |
| 1,01 | OAZ1      | Memczak2013 ALT_ACCEPTOR, ALT_DONOR,<br>coding, INTERNAL, intronic best transcript<br>NM_004152                                                                                                                                                                                                                                                                                                                                                                                                                                                                                                                                                                                                                                                                                                                            |
| 1,01 | RPL21     | Homo sapiens ribosomal protein L21, mRNA (cDNA<br>clone MGC:2150 IMAGE:3543702), complete cds.;<br>Homo sapiens ribosomal protein L21, mRNA (cDNA<br>clone MGC:4136 IMAGE:2964441), complete cds.;<br>Homo sapiens ribosomal protein L21, mRNA (cDNA<br>clone MGC:71252 IMAGE:6084268), complete cds.;<br>Homo sapiens ribosomal protein L21, mRNA (cDNA<br>clone MGC:88165 IMAGE:4281405), complete cds.;<br>Homo sapiens ribosomal protein L21, mRNA (cDNA<br>clone MGC:88326 IMAGE:4248655), complete cds.;<br>Homo sapiens ribosomal protein L21, mRNA (cDNA<br>clone MGC:88334 IMAGE:3931616), complete cds.;<br>Homo sapiens ribosomal protein L21, mRNA (cDNA<br>clone MGC:88581 IMAGE:4901492), complete cds.;<br>Homo sapiens ribosomal protein L21, mRNA (cDNA<br>clone MGC:104275 IMAGE:6724053), complete cds. |
| 1,01 | TMPO      | thymopoietin                                                                                                                                                                                                                                                                                                                                                                                                                                                                                                                                                                                                                                                                                                                                                                                                               |
| 1,01 | FOSB      | FBJ murine osteosarcoma viral oncogene homolog B                                                                                                                                                                                                                                                                                                                                                                                                                                                                                                                                                                                                                                                                                                                                                                           |
| 1,01 | CNGA3     | cyclic nucleotide gated channel alpha 3                                                                                                                                                                                                                                                                                                                                                                                                                                                                                                                                                                                                                                                                                                                                                                                    |
| 1,01 | PHF6      | PHD finger protein 6                                                                                                                                                                                                                                                                                                                                                                                                                                                                                                                                                                                                                                                                                                                                                                                                       |
| 1,01 | FUT5      | fucosyltransferase 5 (alpha (1,3) fucosyltransferase)                                                                                                                                                                                                                                                                                                                                                                                                                                                                                                                                                                                                                                                                                                                                                                      |
| 1,01 | ABCC12    | ATP binding cassette subfamily C member 12                                                                                                                                                                                                                                                                                                                                                                                                                                                                                                                                                                                                                                                                                                                                                                                 |
| 1,01 | LIN52     | lin-52 DREAM MuvB core complex component                                                                                                                                                                                                                                                                                                                                                                                                                                                                                                                                                                                                                                                                                                                                                                                   |
| 1,01 | POLR2J    | polymerase (RNA) II (DNA directed) polypeptide J,<br>13.3kDa                                                                                                                                                                                                                                                                                                                                                                                                                                                                                                                                                                                                                                                                                                                                                               |
| 1,01 | ZBED9     | zinc finger, BED-type containing 9                                                                                                                                                                                                                                                                                                                                                                                                                                                                                                                                                                                                                                                                                                                                                                                         |

|      |                                             |                                                                                                                     |
|------|---------------------------------------------|---------------------------------------------------------------------------------------------------------------------|
| 1,01 | HMGB3                                       | high mobility group box 3                                                                                           |
| 1,01 | BCL2L14                                     | BCL2-like 14 (apoptosis facilitator)                                                                                |
| 1,01 | PFDN5                                       | prefoldin subunit 5                                                                                                 |
| 1,01 | TCP1;<br>SNORA20;<br>SNORA29                | t-complex 1; small nucleolar RNA, H/ACA box 20;<br>small nucleolar RNA, H/ACA box 29                                |
| 1,01 | ENTPD5                                      | ectonucleoside triphosphate diphosphohydrolase 5                                                                    |
| 1,01 | SLC27A3                                     | solute carrier family 27 (fatty acid transporter),<br>member 3                                                      |
| 1,01 | SIRT7                                       | sirtuin 7                                                                                                           |
| 1,01 | NKX6-2                                      | NK6 homeobox 2                                                                                                      |
| 1,01 | SPTBN5                                      | spectrin, beta, non-erythrocytic 5                                                                                  |
| 1,01 | PCF11                                       | PCF11 cleavage and polyadenylation factor subunit                                                                   |
| 1,01 | TFCP2                                       | transcription factor CP2                                                                                            |
| 1,01 | DHX40                                       | DEAH (Asp-Glu-Ala-His) box polypeptide 40                                                                           |
| 1,01 | ZNF552                                      | zinc finger protein 552                                                                                             |
| 1,01 | RPL7L1                                      | ribosomal protein L7-like 1                                                                                         |
| 1,01 | SERINC2                                     | serine incorporator 2                                                                                               |
| 1,01 | INPP5D                                      | inositol polyphosphate-5-phosphatase D                                                                              |
| 1,01 | RPL12                                       | ribosomal protein L12                                                                                               |
| 1,01 | F13B                                        | coagulation factor XIII, B polypeptide                                                                              |
| 1,01 | TLR4                                        | toll-like receptor 4                                                                                                |
| 1,01 | SPON1                                       | spondin 1, extracellular matrix protein                                                                             |
| 1,01 | ZNF90                                       | zinc finger protein 90                                                                                              |
| 1,01 | ADCYAP1                                     | adenylate cyclase activating polypeptide 1 (pituitary)                                                              |
| 1,01 | LRRC43                                      | leucine rich repeat containing 43                                                                                   |
| 1,01 | QPCTL                                       | glutaminyl-peptide cyclotransferase-like                                                                            |
| 1,01 | RNF125                                      | ring finger protein 125, E3 ubiquitin protein ligase                                                                |
| 1,01 | CLIP4                                       | CAP-GLY domain containing linker protein family,<br>member 4                                                        |
| 1,01 | LOC100131315;<br>RP11-758N13.1              | uncharacterized LOC100131315; novel transcript                                                                      |
| 1,01 | SEC14L1;<br>SCARNA16;<br>SNHG20;<br>MIR6516 | SEC14-like lipid binding 1; small Cajal body-specific<br>RNA 16; small nucleolar RNA host gene 20;<br>microRNA 6516 |
| 1,01 | METTL6                                      | methyltransferase like 6                                                                                            |
| 1,01 | IGFL1                                       | IGF like family member 1                                                                                            |
| 1,01 | DHX30                                       | DEAH (Asp-Glu-Ala-His) box helicase 30                                                                              |
| 1,01 | ADAMTS13                                    | ADAM metalloproteinase with thrombospondin type 1<br>motif 13                                                       |
| 1,01 | RAPGEF3                                     | Rap guanine nucleotide exchange factor 3                                                                            |
| 1,01 | KRTAP19-5                                   | keratin associated protein 19-5                                                                                     |
| 1,01 | CYP4F3                                      | cytochrome P450, family 4, subfamily F, polypeptide 3                                                               |
| 1,01 | C12orf75                                    | chromosome 12 open reading frame 75                                                                                 |
| 1,01 | CASP5                                       | caspase 5                                                                                                           |
| 1,01 | SLC39A2                                     | solute carrier family 39 (zinc transporter), member 2                                                               |
| 1,01 | IRX3                                        | iroquois homeobox 3                                                                                                 |
| 1,01 | OBP2B                                       | odorant binding protein 2B                                                                                          |

|      |                                            |                                                                                                                                                                           |
|------|--------------------------------------------|---------------------------------------------------------------------------------------------------------------------------------------------------------------------------|
| 1,01 | LMBRD2                                     | LMBR1 domain containing 2                                                                                                                                                 |
| 1,01 | FAM114A1                                   | family with sequence similarity 114, member A1                                                                                                                            |
| 1,01 | RIPK2                                      | receptor-interacting serine-threonine kinase 2                                                                                                                            |
| 1,01 | RBMV1E;<br>RBMV1B                          | RNA binding motif protein, Y-linked, family 1, member E; RNA binding motif protein, Y-linked, family 1, member B                                                          |
| 1,01 | RBMV1E;<br>RBMV1D;<br>RBMV1B               | RNA binding motif protein, Y-linked, family 1, member E; RNA binding motif protein, Y-linked, family 1, member D; RNA binding motif protein, Y-linked, family 1, member B |
| 1,01 | EIF4A1;<br>SNORD10;<br>SNORA67;<br>SNORA48 | eukaryotic translation initiation factor 4A1; small nucleolar RNA, C/D box 10; small nucleolar RNA, H/ACA box 67; small nucleolar RNA, H/ACA box 48                       |
| 1,01 | ANKRD63                                    | ankyrin repeat domain 63                                                                                                                                                  |
| 1,01 | PEF1                                       | penta-EF-hand domain containing 1                                                                                                                                         |
| 1,01 | KLK3                                       | kallikrein related peptidase 3                                                                                                                                            |
| 1,01 | INPP5D                                     | inositol polyphosphate-5-phosphatase D                                                                                                                                    |
| 1,01 | FAM3D                                      | family with sequence similarity 3, member D                                                                                                                               |
| 1,01 | GRHL3                                      | grainyhead-like transcription factor 3                                                                                                                                    |
| 1,01 | TMOD2                                      | tropomodulin 2 (neuronal)                                                                                                                                                 |
| 1,01 | TMPRSS4                                    | transmembrane protease, serine 4                                                                                                                                          |
| 1,01 | PCDH11X                                    | Salzman2013 ANTISENSE, coding, INTERNAL, intronic best transcript NM_032968                                                                                               |
| 1,01 | ARL13B                                     | ADP-ribosylation factor like GTPase 13B                                                                                                                                   |
| 1,01 | GPATCH2L                                   | G-patch domain containing 2 like                                                                                                                                          |
| 1,01 | COX15                                      | cytochrome c oxidase assembly homolog 15 (yeast)                                                                                                                          |
| 1,01 | KPRP                                       | keratinocyte proline-rich protein                                                                                                                                         |
| 1,01 | BHMG1                                      | basic helix-loop-helix and HMG box domain containing 1                                                                                                                    |
| 1,01 | TIMM50                                     | translocase of inner mitochondrial membrane 50 homolog (S. cerevisiae)                                                                                                    |
| 1,01 | CD9                                        | CD9 molecule                                                                                                                                                              |
| 1,01 | SEZ6                                       | Memczak2013 ANTISENSE, CDS, coding, INTERNAL, intronic best transcript NM_178860                                                                                          |
| 1,01 | UBE2NL                                     | ubiquitin conjugating enzyme E2N-like (gene/pseudogene)                                                                                                                   |
| 1,01 | BLCAP                                      | bladder cancer associated protein                                                                                                                                         |
| 1,01 | PAGE2                                      | P antigen family, member 2 (prostate associated)                                                                                                                          |
| 1,01 | GOLPH3L                                    | golgi phosphoprotein 3-like                                                                                                                                               |
| 1,01 | MLF1                                       | myeloid leukemia factor 1                                                                                                                                                 |
| 1,01 | SSH1                                       | slingshot protein phosphatase 1                                                                                                                                           |
| 1,01 | GPAT3                                      | glycerol-3-phosphate acyltransferase 3                                                                                                                                    |
| 1,01 | METAP1D                                    | methionyl aminopeptidase type 1D (mitochondrial)                                                                                                                          |
| 1,01 | AC007292.7;<br>MPND                        | Transcript Identified by AceView, Entrez Gene ID(s) 84954; novel transcript, antisense to STAP2                                                                           |
| 1,01 | ZFX                                        | zinc finger protein, X-linked                                                                                                                                             |
| 1,01 | TUT1                                       | terminal uridylyl transferase 1, U6 snRNA-specific                                                                                                                        |
| 1,01 | JAG2                                       | jagged 2                                                                                                                                                                  |

|      |                       |                                                                                                                   |
|------|-----------------------|-------------------------------------------------------------------------------------------------------------------|
| 1,01 | TMSB15B; RP11-722G7.1 | Homo sapiens thymosin beta 15B (TMSB15B), mRNA.; Thymosin beta-15B<br>[Source:UniProtKB/Swiss-Prot;Acc:P0CG35]    |
| 1,01 | SMURF1                | SMAD specific E3 ubiquitin protein ligase 1                                                                       |
| 1,01 | CAMK2N1               | calcium/calmodulin-dependent protein kinase II inhibitor 1                                                        |
| 1,01 | ARL2                  | ADP-ribosylation factor like GTPase 2                                                                             |
| 1,01 | NNAT                  | neuronatin                                                                                                        |
| 1,01 | SAG                   | S-antigen; retina and pineal gland (arrestin)                                                                     |
| 1,01 | C19orf33              | chromosome 19 open reading frame 33                                                                               |
| 1,01 | LRIG1                 |                                                                                                                   |
| 1,01 | TRNT1                 | tRNA nucleotidyl transferase, CCA-adding, 1                                                                       |
| 1,01 | RPRD2                 | regulation of nuclear pre-mRNA domain containing 2                                                                |
| 1,01 | STKLD1                | serine/threonine kinase-like domain containing 1<br>[Source:HGNC Symbol;Acc:HGNC:28669]                           |
| 1,01 | SAMD11                | sterile alpha motif domain containing 11                                                                          |
| 1,01 | PSMD3                 | proteasome 26S subunit, non-ATPase 3                                                                              |
| 1,01 | TRIM60                | tripartite motif containing 60                                                                                    |
| 1,01 | EZH2                  | enhancer of zeste 2 polycomb repressive complex 2 subunit                                                         |
| 1,01 | AAK1                  | AP2 associated kinase 1                                                                                           |
| 1,01 | DDB1                  | damage-specific DNA binding protein 1                                                                             |
| 1,01 | CFL1                  | cofilin 1 (non-muscle)                                                                                            |
| 1,01 | PPME1                 | protein phosphatase methylesterase 1                                                                              |
| 1,01 | RCOR3                 | REST corepressor 3                                                                                                |
| 1,01 | POLDIP2               | polymerase (DNA-directed), delta interacting protein 2                                                            |
| 1,01 | ZNF780A               | zinc finger protein 780A                                                                                          |
| 1,01 | TM4SF1                | transmembrane 4 L six family member 1                                                                             |
| 1,01 | ATP8B1                | Salzman2013 ANTISENSE, CDS, coding, INTERNAL, intronic, OVCODE, OVERLAPTX, OVEXON, UTR5 best transcript NM_005603 |
| 1,01 | FZD8; MIR4683         | frizzled class receptor 8; microRNA 4683                                                                          |
| 1,01 | NDUFV3                | NADH dehydrogenase (ubiquinone) flavoprotein 3, 10kDa                                                             |
| 1,01 | DCAF12                | DDB1 and CUL4 associated factor 12                                                                                |
| 1,01 | MYO15B                | Memczak2013 ANTISENSE, INTERNAL, ncRNA best transcript NR_003587                                                  |
| 1,01 | SMIM10L2A             | small integral membrane protein 10 like 2A                                                                        |
| 1,01 | SLC18B1               | solute carrier family 18, subfamily B, member 1                                                                   |
| 1,01 | LRRC16B               | leucine rich repeat containing 16B                                                                                |
| 1,01 | SLC17A6               | solute carrier family 17 (vesicular glutamate transporter), member 6                                              |
| 1,01 | ECD                   | ecdysoneless homolog (Drosophila)                                                                                 |
| 1,01 | NUDT1                 | nudix hydrolase 1                                                                                                 |
| 1,01 | GGPS1                 | geranylgeranyl diphosphate synthase 1                                                                             |
| 1,01 | RPSA; SNORA62; SNORA6 | ribosomal protein SA; small nucleolar RNA, H/ACA box 62; small nucleolar RNA, H/ACA box 6                         |
| 1,01 | C10orf95              | chromosome 10 open reading frame 95                                                                               |

|      |                         |                                                                                 |
|------|-------------------------|---------------------------------------------------------------------------------|
| 1,01 | STMN4                   | stathmin-like 4                                                                 |
| 1,01 | C6orf132                | chromosome 6 open reading frame 132                                             |
| 1,01 | DHPS                    | deoxyhypusine synthase                                                          |
| 1,01 | EDAR                    | ectodysplasin A receptor                                                        |
| 1,01 | SP7                     | Sp7 transcription factor                                                        |
| 1,01 | WDR53                   | WD repeat domain 53                                                             |
| 1,01 | XKR8                    | X-linked Kx blood group related 8                                               |
| 1,01 | UQCRC1                  | ubiquinol-cytochrome c reductase core protein I                                 |
| 1,01 | FUBP1                   | far upstream element (FUSE) binding protein 1                                   |
| 1,01 | PMS1                    | PMS1 homolog 1, mismatch repair system component                                |
| 1,01 | LRRC47                  | leucine rich repeat containing 47                                               |
| 1,01 | HIST1H2AL;<br>HIST1H2BN | histone cluster 1, H2al; histone cluster 1, H2bn                                |
| 1,01 | HPN                     | hepsin                                                                          |
| 1,01 | ZNF646                  | Memczak2013 ANTISENSE, coding, INTERNAL,<br>intronic best transcript NM_014699  |
| 1,01 | TMEM19                  | transmembrane protein 19                                                        |
| 1,01 | PLPPR3                  | phospholipid phosphatase related 3                                              |
| 1,01 | STT3B                   | STT3B, subunit of the oligosaccharyltransferase<br>complex (catalytic)          |
| 1,01 | LIG3                    | ligase III, DNA, ATP-dependent                                                  |
| 1,01 | HIST1H2AK               | histone cluster 1, H2ak                                                         |
| 1,01 | MINOS1-NBL1             | MINOS1-NBL1 readthrough                                                         |
| 1,01 | SLC2A9                  | solute carrier family 2 (facilitated glucose transporter),<br>member 9          |
| 1,01 | HSD3B7                  | hydroxy-delta-5-steroid dehydrogenase, 3 beta- and<br>steroid delta-isomerase 7 |
| 1,01 | MLXIP                   | MLX interacting protein                                                         |
| 1,01 | LYPD8                   | LY6/PLAUR domain containing 8                                                   |
| 1,01 | PDRG1                   | p53 and DNA-damage regulated 1                                                  |
| 1,01 | BCL11B                  | B-cell CLL/lymphoma 11B (zinc finger protein)                                   |
| 1,01 | RARS                    | arginyl-tRNA synthetase                                                         |
| 1,01 | ZNRF3                   | zinc and ring finger 3                                                          |
| 1,01 | PACS1                   | phosphofurin acidic cluster sorting protein 1                                   |
| 1,01 | PTF1A                   | pancreas specific transcription factor, 1a                                      |
| 1,01 | EEA1                    | early endosome antigen 1                                                        |
| 1,01 | FAM98C                  | family with sequence similarity 98, member C                                    |
| 1,01 | FBN3                    | fibrillin 3                                                                     |
| 1,01 | RNF146                  | ring finger protein 146                                                         |
| 1,01 | THEM5                   | thioesterase superfamily member 5                                               |
| 1,01 | ARPC2                   | actin related protein 2/3 complex subunit 2                                     |
| 1,01 | CD24                    | CD24 molecule                                                                   |

|      |                     |                                                                                                                                                                                                                                                                                                                                                                                                                                                                                                                                                                                                                                                                                                                                                                                                                                                                                |
|------|---------------------|--------------------------------------------------------------------------------------------------------------------------------------------------------------------------------------------------------------------------------------------------------------------------------------------------------------------------------------------------------------------------------------------------------------------------------------------------------------------------------------------------------------------------------------------------------------------------------------------------------------------------------------------------------------------------------------------------------------------------------------------------------------------------------------------------------------------------------------------------------------------------------|
| 1,01 | PGAM1               | Homo sapiens phosphoglycerate mutase 1 (brain), mRNA (cDNA clone MGC:8462 IMAGE:2821567), complete cds.; Homo sapiens phosphoglycerate mutase 1 (brain), mRNA (cDNA clone MGC:19732 IMAGE:3604026), complete cds.; Homo sapiens phosphoglycerate mutase 1 (brain), mRNA (cDNA clone MGC:15086 IMAGE:4299008), complete cds.; Homo sapiens phosphoglycerate mutase 1 (brain), mRNA (cDNA clone MGC:61519 IMAGE:5787678), complete cds.; Homo sapiens phosphoglycerate mutase 1 (brain), mRNA (cDNA clone MGC:71323 IMAGE:6584466), complete cds.; Homo sapiens phosphoglycerate mutase 1 (brain), mRNA (cDNA clone MGC:87445 IMAGE:5262935), complete cds.; Homo sapiens phosphoglycerate mutase 1 (brain), mRNA (cDNA clone MGC:88744 IMAGE:6297173), complete cds.; Homo sapiens phosphoglycerate mutase 1 (brain), mRNA (cDNA clone MGC:189702 IMAGE:8862699), complete cds. |
| 1,01 | MTIF2               | mitochondrial translational initiation factor 2                                                                                                                                                                                                                                                                                                                                                                                                                                                                                                                                                                                                                                                                                                                                                                                                                                |
| 1,01 | ZNF679              | zinc finger protein 679                                                                                                                                                                                                                                                                                                                                                                                                                                                                                                                                                                                                                                                                                                                                                                                                                                                        |
| 1,01 | NOXA1               | NADPH oxidase activator 1                                                                                                                                                                                                                                                                                                                                                                                                                                                                                                                                                                                                                                                                                                                                                                                                                                                      |
| 1,01 | JAZF1               | JAZF zinc finger 1                                                                                                                                                                                                                                                                                                                                                                                                                                                                                                                                                                                                                                                                                                                                                                                                                                                             |
| 1,01 | SLC25A15;<br>MIR621 | solute carrier family 25 (mitochondrial carrier; ornithine transporter) member 15; microRNA 621                                                                                                                                                                                                                                                                                                                                                                                                                                                                                                                                                                                                                                                                                                                                                                                |
| 1,01 | ICE2                | interactor of little elongation complex ELL subunit 2                                                                                                                                                                                                                                                                                                                                                                                                                                                                                                                                                                                                                                                                                                                                                                                                                          |
| 1,01 | NCAPH               | non-SMC condensin I complex subunit H                                                                                                                                                                                                                                                                                                                                                                                                                                                                                                                                                                                                                                                                                                                                                                                                                                          |
| 1,01 | CCT5                | chaperonin containing TCP1, subunit 5 (epsilon)                                                                                                                                                                                                                                                                                                                                                                                                                                                                                                                                                                                                                                                                                                                                                                                                                                |
| 1,01 | CELF3               | CUGBP, Elav-like family member 3                                                                                                                                                                                                                                                                                                                                                                                                                                                                                                                                                                                                                                                                                                                                                                                                                                               |
| 1,01 | KRT27               | keratin 27, type I                                                                                                                                                                                                                                                                                                                                                                                                                                                                                                                                                                                                                                                                                                                                                                                                                                                             |
| 1,01 | THOC7               | THO complex 7                                                                                                                                                                                                                                                                                                                                                                                                                                                                                                                                                                                                                                                                                                                                                                                                                                                                  |
| 1,01 | HIST1H4G            | histone cluster 1, H4g                                                                                                                                                                                                                                                                                                                                                                                                                                                                                                                                                                                                                                                                                                                                                                                                                                                         |
| 1,01 | NXF2B; NXF2         | nuclear RNA export factor 2B; nuclear RNA export factor 2                                                                                                                                                                                                                                                                                                                                                                                                                                                                                                                                                                                                                                                                                                                                                                                                                      |
| 1,01 | RSPH9               | radial spoke head 9 homolog (Chlamydomonas)                                                                                                                                                                                                                                                                                                                                                                                                                                                                                                                                                                                                                                                                                                                                                                                                                                    |
| 1,01 | SET                 | SET nuclear proto-oncogene                                                                                                                                                                                                                                                                                                                                                                                                                                                                                                                                                                                                                                                                                                                                                                                                                                                     |
| 1,01 | OGG1                | 8-oxoguanine DNA glycosylase                                                                                                                                                                                                                                                                                                                                                                                                                                                                                                                                                                                                                                                                                                                                                                                                                                                   |
| 1,01 | SPATA31D3           | SPATA31 subfamily D, member 3                                                                                                                                                                                                                                                                                                                                                                                                                                                                                                                                                                                                                                                                                                                                                                                                                                                  |
| 1,01 | NKRF                | NFkB repressing factor                                                                                                                                                                                                                                                                                                                                                                                                                                                                                                                                                                                                                                                                                                                                                                                                                                                         |
| 1,01 | RPL11               | ribosomal protein L11                                                                                                                                                                                                                                                                                                                                                                                                                                                                                                                                                                                                                                                                                                                                                                                                                                                          |
| 1,01 | PCOLCE2             | procollagen C-endopeptidase enhancer 2                                                                                                                                                                                                                                                                                                                                                                                                                                                                                                                                                                                                                                                                                                                                                                                                                                         |
| 1,01 | PCLO                | piccolo presynaptic cytomatrix protein                                                                                                                                                                                                                                                                                                                                                                                                                                                                                                                                                                                                                                                                                                                                                                                                                                         |
| 1,01 | OPALIN              | oligodendrocytic myelin paranodal and inner loop protein                                                                                                                                                                                                                                                                                                                                                                                                                                                                                                                                                                                                                                                                                                                                                                                                                       |
| 1,01 | sep-01              | sepin 1                                                                                                                                                                                                                                                                                                                                                                                                                                                                                                                                                                                                                                                                                                                                                                                                                                                                        |
| 1,01 | PAFAH1B2            | platelet-activating factor acetylhydrolase 1b, catalytic subunit 2 (30kDa)                                                                                                                                                                                                                                                                                                                                                                                                                                                                                                                                                                                                                                                                                                                                                                                                     |
| 1,01 | CHRM3               | cholinergic receptor, muscarinic 3                                                                                                                                                                                                                                                                                                                                                                                                                                                                                                                                                                                                                                                                                                                                                                                                                                             |
| 1,01 | RB1CC1              | RB1-inducible coiled-coil 1                                                                                                                                                                                                                                                                                                                                                                                                                                                                                                                                                                                                                                                                                                                                                                                                                                                    |
| 1,01 | TMEM243             | transmembrane protein 243, mitochondrial                                                                                                                                                                                                                                                                                                                                                                                                                                                                                                                                                                                                                                                                                                                                                                                                                                       |
| 1,01 | SAMD12              | sterile alpha motif domain containing 12                                                                                                                                                                                                                                                                                                                                                                                                                                                                                                                                                                                                                                                                                                                                                                                                                                       |

|      |                    |                                                                          |
|------|--------------------|--------------------------------------------------------------------------|
| 1,01 | ARHGEF25           | Rho guanine nucleotide exchange factor 25                                |
| 1,01 | ARSB               | arylsulfatase B                                                          |
| 1,01 | TRIM41             | tripartite motif containing 41                                           |
| 1,01 | BCLAF1             | BCL2-associated transcription factor 1                                   |
| 1,01 | POT1               | protection of telomeres 1                                                |
| 1,01 | ID2                | inhibitor of DNA binding 2, dominant negative helix-loop-helix protein   |
| 1,01 | COL9A1             | collagen, type IX, alpha 1                                               |
| 1,01 | SEC23A             | Sec23 homolog A, COPII coat complex component                            |
| 1,01 | DLGAP4             | discs, large (Drosophila) homolog-associated protein 4                   |
| 1,01 | CHID1              | chitinase domain containing 1                                            |
| 1,01 | KISS1              | KiSS-1 metastasis-suppressor                                             |
| 1,01 | MBL2               | mannose-binding lectin (protein C) 2, soluble                            |
| 1,01 | TMEM39A            | transmembrane protein 39A                                                |
| 1,01 | IL19               | interleukin 19                                                           |
| 1,01 | MAPK14             | mitogen-activated protein kinase 14                                      |
| 1,01 | CALM2              | calmodulin 2 (phosphorylase kinase, delta)                               |
| 1,01 | HNRNPU             | heterogeneous nuclear ribonucleoprotein U (scaffold attachment factor A) |
| 1,01 | MIOS               | missing oocyte, meiosis regulator, homolog (Drosophila)                  |
| 1,01 | TSR2               | TSR2, 20S rRNA accumulation, homolog (S. cerevisiae)                     |
| 1,01 | ATP6V0D1           | ATPase, H <sup>+</sup> transporting, lysosomal 38kDa, V0 subunit d1      |
| 1,01 | SLC5A2             | solute carrier family 5 (sodium/glucose cotransporter), member 2         |
| 1,01 | CTR9               | CTR9 homolog, Paf1/RNA polymerase II complex component                   |
| 1,01 | PHKA1              | phosphorylase kinase, alpha 1 (muscle)                                   |
| 1,01 | ZNHIT1             | zinc finger, HIT-type containing 1                                       |
| 1,01 | EIF4E2             | eukaryotic translation initiation factor 4E family member 2              |
| 1,01 | ZNF540; ZNF571-AS1 | zinc finger protein 540; ZNF571 antisense RNA 1                          |
| 1,01 | UNKL               | unkempt family zinc finger-like                                          |
| 1,01 | ZNF598             | zinc finger protein 598                                                  |
| 1,01 | CCDC182            | coiled-coil domain containing 182                                        |
| 1,01 | TPP1               | tripeptidyl peptidase I                                                  |
| 1,01 | HSBP1L1            | heat shock factor binding protein 1-like 1                               |
| 1,01 | OR7G2              | olfactory receptor, family 7, subfamily G, member 2                      |
| 1,01 | MTMR9              | myotubularin related protein 9                                           |
| 1,01 | JAGN1              | jagunal homolog 1                                                        |
| 1,01 | SOHLH1             | spermatogenesis and oogenesis specific basic helix-loop-helix 1          |
| 1,01 | RGP1               | RGP1 homolog, RAB6A GEF complex partner 1                                |
| 1,01 | MAF1               | MAF1 homolog, negative regulator of RNA polymerase III                   |
| 1,01 | GOT1               | glutamic-oxaloacetic transaminase 1, soluble                             |

|      |                             |                                                                                                        |
|------|-----------------------------|--------------------------------------------------------------------------------------------------------|
| 1,01 | ASAH1                       | N-acylsphingosine amidohydrolase (acid ceramidase) 1                                                   |
| 1,01 | FAM229B                     | family with sequence similarity 229, member B                                                          |
| 1,01 | KAT6B                       | K(lysine) acetyltransferase 6B                                                                         |
| 1,01 | HSFX2; HSFX1                | heat shock transcription factor family, X-linked 2; heat shock transcription factor family, X-linked 1 |
| 1,01 | HSPA2                       | heat shock 70kDa protein 2                                                                             |
| 1,01 | TNFAIP6                     | tumor necrosis factor, alpha-induced protein 6                                                         |
| 1,01 | HIST4H4                     | histone cluster 4, H4                                                                                  |
| 1,01 | GPR132                      | G protein-coupled receptor 132                                                                         |
| 1,01 | TMEM158                     | transmembrane protein 158 (gene/pseudogene)                                                            |
| 1,01 | CSH2                        | chorionic somatomammotropin hormone 2                                                                  |
| 1,01 | HOXC10                      | homeobox C10                                                                                           |
| 1,01 | GID4                        | GID complex subunit 4 homolog                                                                          |
| 1,01 | POC1B; POC1B-GALNT4; GALNT4 | POC1 centriolar protein B; POC1B-GALNT4 readthrough; polypeptide N-acetylgalactosaminyltransferase 4   |
| 1,01 | HIST1H3F                    | histone cluster 1, H3f                                                                                 |
| 1,01 | DHX9                        | DEAH (Asp-Glu-Ala-His) box helicase 9                                                                  |
| 1,01 | CHML                        | choroideremia-like (Rab escort protein 2)                                                              |
| 1,01 | RTKN                        | rhotekin                                                                                               |
| 1,01 | SMIM11A                     | small integral membrane protein 11A                                                                    |
| 1,01 | MFS10                       | major facilitator superfamily domain containing 10                                                     |
| 1,01 | DGCR6                       | DiGeorge syndrome critical region gene 6                                                               |
| 1,01 | VBP1                        | von Hippel-Lindau binding protein 1                                                                    |
| 1,01 | ITFG2                       | integrin alpha FG-GAP repeat containing 2                                                              |
| 1,01 | NAA50                       | N(alpha)-acetyltransferase 50, NatE catalytic subunit                                                  |
| 1,01 | TMEM230                     | transmembrane protein 230                                                                              |
| 1,01 | TP53TG3B; TP53TG3; TP53TG3C | TP53 target 3B; TP53 target 3; TP53 target 3C                                                          |
| 1,01 | NRDC; MIR761                | nardilysin convertase; microRNA 761                                                                    |
| 1,01 | SLAMF8                      | SLAM family member 8                                                                                   |
| 1,01 | ago-01                      | argonaute RISC catalytic component 1                                                                   |
| 1,01 | ENO1                        | enolase 1, (alpha)                                                                                     |
| 1,01 | C15orf53                    | chromosome 15 open reading frame 53                                                                    |
| 1,01 | SIVA1                       | SIVA1, apoptosis-inducing factor                                                                       |
| 1,01 | TGIF2-C20orf24              | TGIF2-C20orf24 readthrough                                                                             |
| 1,01 | SLC39A1                     | solute carrier family 39 (zinc transporter), member 1                                                  |
| 1,01 | TMPRSS12                    | transmembrane (C-terminal) protease, serine 12                                                         |
| 1,01 | VCL                         | vinculin                                                                                               |
| 1,01 | DCBLD2                      | discoidin, CUB and LCCL domain containing 2                                                            |
| 1,01 | MAGEF1                      | MAGE family member F1                                                                                  |
| 1,01 | SLC35A5                     | solute carrier family 35, member A5                                                                    |
| 1,01 | GJB2                        | gap junction protein beta 2                                                                            |
| 1,01 | XRN2                        | 5-3 exoribonuclease 2                                                                                  |
| 1,01 | C8orf22                     | chromosome 8 open reading frame 22                                                                     |
| 1,01 | NPC1L1                      | NPC1-like 1                                                                                            |
| 1,01 | TNFSF12-TNFSF13             | TNFSF12-TNFSF13 readthrough                                                                            |

|      |                       |                                                                    |
|------|-----------------------|--------------------------------------------------------------------|
| 1,01 | ABCD3                 | ATP binding cassette subfamily D member 3                          |
| 1,01 | TMEM14B               | transmembrane protein 14B                                          |
| 1,01 | INPP5D                | inositol polyphosphate-5-phosphatase D                             |
| 1,01 | UCK2; MIR3658         | uridine-cytidine kinase 2; microRNA 3658                           |
| 1,01 | BORCS7-ASMT           | BORCS7-ASMT readthrough (NMD candidate)                            |
| 1,01 | SLC35D3               | solute carrier family 35, member D3                                |
| 1,01 | SNRNP40               | small nuclear ribonucleoprotein, U5 40kDa subunit                  |
| 1,01 | RPL14                 | ribosomal protein L14                                              |
| 1,01 | RPS6KA1               | ribosomal protein S6 kinase, 90kDa, polypeptide 1                  |
| 1,01 | PPOX                  | protoporphyrinogen oxidase                                         |
| 1,01 | GEMIN2                | gem nuclear organelle associated protein 2                         |
| 1,01 | ESPL1                 | extra spindle pole bodies like 1, separase                         |
| 1,01 | GUCD1                 | guanylyl cyclase domain containing 1                               |
| 1,01 | FBXO48                | F-box protein 48                                                   |
| 1,01 | OR2L3                 | olfactory receptor, family 2, subfamily L, member 3                |
| 1,01 | MC2R                  | melanocortin 2 receptor (adrenocorticotrophic hormone)             |
| 1,01 | IQCH                  | IQ motif containing H                                              |
| 1,01 | GAS2L3                | growth arrest-specific 2 like 3                                    |
| 1,01 | GYPE                  | glycophorin E (MNS blood group)                                    |
| 1,01 | MED30                 | mediator complex subunit 30                                        |
| 1,01 | TMEM239;<br>C20orf141 | transmembrane protein 239; chromosome 20 open<br>reading frame 141 |
| 1,01 | ADAM30                | ADAM metallopeptidase domain 30                                    |
| 1,01 | YEATS4                | YEATS domain containing 4                                          |
| 1,01 | CUL2                  | cullin 2                                                           |
| 1,01 | EXOC1                 | exocyst complex component 1                                        |
| 1,01 | GRIA4                 | glutamate receptor, ionotropic, AMPA 4                             |
| 1,01 | FAM71E2               | family with sequence similarity 71, member E2                      |
| 1,01 | SF3B2                 | splicing factor 3b subunit 2                                       |
| 1,01 | FAM151B               | family with sequence similarity 151, member B                      |
| 1,01 | PHKG2                 | phosphorylase kinase, gamma 2 (testis)                             |
| 1,01 | PIP5K1B               | Transcript Identified by AceView, Entrez Gene ID(s)<br>8395        |
| 1,01 | PLAU                  | plasminogen activator, urokinase                                   |
| 1,01 | TRIM50                | tripartite motif containing 50                                     |
| 1,01 | SNAPC3                | small nuclear RNA activating complex polypeptide 3                 |
| 1,01 | BAP1                  | BRCA1 associated protein 1                                         |
| 1,01 | IRX1                  | iroquois homeobox 1                                                |
| 1,01 | NRAP                  | nebulin-related anchoring protein                                  |
| 1,01 | INPP1                 | inositol polyphosphate-1-phosphatase                               |
| 1,01 | ERCC5                 | excision repair cross-complementation group 5                      |
| 1,01 | NMNAT1                | nicotinamide nucleotide adenyltransferase 1                        |
| 1,01 | PRR11                 | proline rich 11                                                    |
| 1,01 | DEFA6                 | defensin, alpha 6, Paneth cell-specific                            |
| 1,01 | ZNF397                | zinc finger protein 397                                            |
| 1,01 | MIER2                 | mesoderm induction early response 1, family member 2               |
| 1,01 | SMR3A                 | submaxillary gland androgen regulated protein 3A                   |
| 1,01 | PRKCB                 | protein kinase C, beta                                             |

|      |                   |                                                                       |
|------|-------------------|-----------------------------------------------------------------------|
| 1,01 | ZC2HC1B           | zinc finger, C2HC-type containing 1B                                  |
| 1,01 | RELL2             | RELT-like 2                                                           |
| 1,01 | CPSF6             | cleavage and polyadenylation specific factor 6                        |
| 1,01 | TBC1D3G           | TBC1 domain family, member 3G                                         |
| 1,01 | FAM126A           | family with sequence similarity 126, member A                         |
| 1,01 | STAM              | signal transducing adaptor molecule (SH3 domain and ITAM motif) 1     |
| 1,01 | MYBL1             | v-myb avian myeloblastosis viral oncogene homolog-like 1              |
| 1,01 | FAM53A            | family with sequence similarity 53, member A                          |
| 1,01 | PSTPIP1           | proline-serine-threonine phosphatase interacting protein 1            |
| 1,01 | FXVD3;<br>MIR6887 | FXVD domain containing ion transport regulator 3;<br>microRNA 6887    |
| 1,01 | ZFP90             | ZFP90 zinc finger protein                                             |
| 1,01 | RASA3             | RAS p21 protein activator 3                                           |
| 1,01 | INTS2             | integrator complex subunit 2                                          |
| 1,01 | LRCH3             | leucine-rich repeats and calponin homology (CH) domain containing 3   |
| 1,01 | MAP4K5            | mitogen-activated protein kinase kinase kinase kinase 5               |
| 1,01 | CALCR             | calcitonin receptor                                                   |
| 1,01 | FBL               | fibrillarin                                                           |
| 1,01 | ZSWIM4            | Transcript Identified by AceView, Entrez Gene ID(s)<br>65249          |
| 1,01 | SMC6              | Transcript Identified by AceView, Entrez Gene ID(s)<br>79677          |
| 1,01 | JUP               | junction plakoglobin                                                  |
| 1,01 | GNA13             | guanine nucleotide binding protein (G protein), alpha 13              |
| 1,01 | PHF14             | PHD finger protein 14                                                 |
| 1,01 | MPHOSPH6          | M-phase phosphoprotein 6                                              |
| 1,01 | MBD4              | methyl-CpG binding domain 4 DNA glycosylase                           |
| 1,01 | TCAIM             | T cell activation inhibitor, mitochondrial                            |
| 1,01 | PXMP2             | peroxisomal membrane protein 2                                        |
| 1,01 | SMAD7             | SMAD family member 7                                                  |
| 1,01 | USF3              | upstream transcription factor family member 3                         |
| 1,01 | GRAP              | GRB2-related adaptor protein                                          |
| 1,01 | PTH2R             | parathyroid hormone 2 receptor                                        |
| 1,01 | VAPB              | VAMP (vesicle-associated membrane protein)-associated protein B and C |
| 1,01 | TNS2              | tensin 2                                                              |
| 1,01 | SLCO5A1           | solute carrier organic anion transporter family, member 5A1           |
| 1,01 | NAA15             | N(alpha)-acetyltransferase 15, NatA auxiliary subunit                 |
| 1,01 | RARRES3           | retinoic acid receptor responder (tazarotene induced) 3               |
| 1,01 | CAP2              | CAP, adenylate cyclase-associated protein, 2 (yeast)                  |
| 1,01 | MYO15B            | myosin XVb                                                            |
| 1,01 | SYNCRIP           | synaptotagmin binding, cytoplasmic RNA interacting protein            |

|      |                  |                                                                                                                                                            |
|------|------------------|------------------------------------------------------------------------------------------------------------------------------------------------------------|
| 1,01 | ADGRL3           | adhesion G protein-coupled receptor L3                                                                                                                     |
| 1,01 | POLR2J3          | polymerase (RNA) II (DNA directed) polypeptide J3                                                                                                          |
| 1,01 | BRD8             | bromodomain containing 8                                                                                                                                   |
| 1,01 | SP140            | SP140 nuclear body protein                                                                                                                                 |
| 1,01 | BRD1             | bromodomain containing 1                                                                                                                                   |
| 1,01 | KLHL26           | kelch-like family member 26                                                                                                                                |
| 1,01 | NDST1            | N-deacetylase/N-sulfotransferase (heparan glucosaminyl) 1                                                                                                  |
| 1,01 | HMP19            | HMP19 protein; Neuron-specific protein family member 2 [Source:UniProtKB/Swiss-Prot;Acc:Q9Y328]; Transcript Identified by AceView, Entrez Gene ID(s) 51617 |
| 1,01 | HES3             | hes family bHLH transcription factor 3                                                                                                                     |
| 1,01 | TMEM134          | transmembrane protein 134                                                                                                                                  |
| 1,01 | SLC14A2          | solute carrier family 14 (urea transporter), member 2                                                                                                      |
| 1,01 | ACER3            | alkaline ceramidase 3                                                                                                                                      |
| 1,01 | ALCAM            | activated leukocyte cell adhesion molecule                                                                                                                 |
| 1,01 | ATG3             | autophagy related 3                                                                                                                                        |
| 1,01 | ASAP1; ASAP1-IT2 | ArfGAP with SH3 domain, ankyrin repeat and PH domain 1; ASAP1 intronic transcript 2                                                                        |
| 1,01 | LDLR; MIR6886    | low density lipoprotein receptor; microRNA 6886                                                                                                            |
| 1,01 | TRAPPC4          | trafficking protein particle complex 4                                                                                                                     |
| 1,01 | IL18R1           | interleukin 18 receptor 1                                                                                                                                  |
| 1,01 | NDUFA2           | NADH dehydrogenase (ubiquinone) 1 alpha subcomplex, 2, 8kDa                                                                                                |
| 1,01 | ACAA1            | acetyl-CoA acyltransferase 1                                                                                                                               |
| 1,01 | SCN1A            | sodium channel, voltage gated, type I alpha subunit                                                                                                        |
| 1,01 | LDHA             | lactate dehydrogenase A                                                                                                                                    |
| 1,01 | TOB2             | transducer of ERBB2, 2                                                                                                                                     |
| 1,01 | CFAP77           | cilia and flagella associated protein 77                                                                                                                   |
| 1,01 | IWS1             | IWS1 homolog (S. cerevisiae)                                                                                                                               |
| 1,01 | CCDC43           | coiled-coil domain containing 43                                                                                                                           |
| 1,01 | RPS26            | ribosomal protein S26                                                                                                                                      |
| 1,01 | GOLGA8DP         | golgin A8 family, member D, pseudogene                                                                                                                     |
| 1,01 | MMP19            | matrix metalloproteinase 19                                                                                                                                |
| 1,01 | CYB5R4           | cytochrome b5 reductase 4                                                                                                                                  |
| 1,01 | UCHL3            | ubiquitin C-terminal hydrolase L3                                                                                                                          |
| 1,01 | KCNQ5            | Jeck2013 ALT_ACCEPTOR, ALT_DONOR, coding, INTERNAL, intronic best transcript NM_001160133                                                                  |
| 1,01 | CREG1            | cellular repressor of E1A-stimulated genes 1                                                                                                               |
| 1,01 | TNFRSF11A        | tumor necrosis factor receptor superfamily, member 11a, NFkB activator                                                                                     |
| 1,01 | TNPO3            | transportin 3                                                                                                                                              |
| 1,01 | MESP2            | mesoderm posterior bHLH transcription factor 2                                                                                                             |
| 1,01 | GSTP1            | glutathione S-transferase pi 1                                                                                                                             |
| 1,01 | ADRB3            | adrenoceptor beta 3                                                                                                                                        |
| 1,01 | ZNHIT6           | zinc finger, HIT-type containing 6                                                                                                                         |
| 1,01 | RAB3IL1          | RAB3A interacting protein (rabin3)-like 1                                                                                                                  |
| 1,01 | SATL1            | spermidine/spermine N1-acetyl transferase-like 1                                                                                                           |
| 1,01 | VDAC3            | voltage-dependent anion channel 3                                                                                                                          |

|      |                           |                                                                                                                 |
|------|---------------------------|-----------------------------------------------------------------------------------------------------------------|
| 1,01 | SLC22A15                  | solute carrier family 22, member 15                                                                             |
| 1,01 | HNRNPCL3;<br>HNRNPCL4     | heterogeneous nuclear ribonucleoprotein C-like 3;<br>heterogeneous nuclear ribonucleoprotein C-like 4           |
| 1,01 | HSP90AB1                  | heat shock protein 90kDa alpha (cytosolic), class B<br>member 1                                                 |
| 1,01 | ENPP1                     | ectonucleotide pyrophosphatase/phosphodiesterase 1                                                              |
| 1,01 | RCOR1                     | REST corepressor 1                                                                                              |
| 1,01 | USP17L22;<br>USP17L20     | ubiquitin specific peptidase 17-like family member 22;<br>ubiquitin specific peptidase 17-like family member 20 |
| 1,01 | RAD50                     | RAD50 homolog, double strand break repair protein                                                               |
| 1,01 | EXOSC2                    | exosome component 2                                                                                             |
| 1,01 | SYNGR2                    | synaptogyrin 2                                                                                                  |
| 1,01 | ST8SIA1                   | ST8 alpha-N-acetyl-neuraminide alpha-2,8-<br>sialyltransferase 1                                                |
| 1,01 | MRRF                      | mitochondrial ribosome recycling factor                                                                         |
| 1,01 | XRCC3                     | X-ray repair complementing defective repair in Chinese<br>hamster cells 3                                       |
| 1,01 | LSMEM2                    | leucine-rich single-pass membrane protein 2                                                                     |
| 1,01 | LOC100421561              | family with sequence similarity 133, member A<br>pseudogene                                                     |
| 1,01 | ATPAF2                    | ATP synthase mitochondrial F1 complex assembly<br>factor 2                                                      |
| 1,01 | SNAP29                    | synaptosome associated protein 29kDa                                                                            |
| 1,01 | LSM12                     | LSM12 homolog                                                                                                   |
| 1,01 | RAB44                     | RAB44, member RAS oncogene family                                                                               |
| 1,01 | FRG1BP                    | FSHD region gene 1 family member B, pseudogene                                                                  |
| 1,01 | ZNF454                    | zinc finger protein 454                                                                                         |
| 1,01 | FAM102A                   | family with sequence similarity 102, member A                                                                   |
| 1,01 | AP1M1                     | Memczak2013 ALT_ACCEPTOR, ALT_DONOR,<br>coding, INTERNAL, intronic best transcript<br>NM_032493                 |
| 1,01 | MYLIP; MIR4639            | myosin regulatory light chain interacting protein;<br>microRNA 4639                                             |
| 1,01 | ATP5B                     | ATP synthase, H <sup>+</sup> transporting, mitochondrial F1<br>complex, beta polypeptide                        |
| 1,01 | DMRT3                     | doublesex and mab-3 related transcription factor 3                                                              |
| 1,01 | STYX                      | serine/threonine/tyrosine interacting protein                                                                   |
| 1,01 | ADGRE1                    | adhesion G protein-coupled receptor E1                                                                          |
| 1,01 | PKD2                      | pyruvate dehydrogenase kinase, isozyme 2                                                                        |
| 1,01 | ZXDB                      | zinc finger, X-linked, duplicated B                                                                             |
| 1,01 | AIFM1                     | apoptosis-inducing factor, mitochondrion-associated, 1                                                          |
| 1,01 | LMNTD1                    | lamin tail domain containing 1                                                                                  |
| 1,01 | CNOT10                    | CCR4-NOT transcription complex subunit 10                                                                       |
| 1,01 | DCANP1                    | dendritic cell-associated nuclear protein                                                                       |
| 1,01 | PDCD4;<br>MIR4680         | programmed cell death 4 (neoplastic transformation<br>inhibitor); microRNA 4680                                 |
| 1,01 | CCNH                      | cyclin H                                                                                                        |
| 1,01 | SAA2; SAA2-<br>SAA4; SAA4 | serum amyloid A2; SAA2-SAA4 readthrough; serum<br>amyloid A4, constitutive                                      |

|      |                         |                                                                                  |
|------|-------------------------|----------------------------------------------------------------------------------|
| 1,01 | FOXH1                   | forkhead box H1                                                                  |
| 1,01 | CD1A                    | CD1a molecule                                                                    |
| 1,01 | BLK                     | Transcript Identified by AceView, Entrez Gene ID(s)<br>640                       |
| 1,01 | ASPH                    | aspartate beta-hydroxylase                                                       |
| 1,01 | CNIH3; RP11-<br>449J1.1 | Transcript Identified by AceView, Entrez Gene ID(s)<br>149111; novel transcript  |
| 1,01 | SLC16A1                 | solute carrier family 16 (monocarboxylate transporter),<br>member 1              |
| 1,01 | GRM2                    | glutamate receptor, metabotropic 2                                               |
| 1,01 | NDUFA10                 | NADH dehydrogenase (ubiquinone) 1 alpha<br>subcomplex, 10, 42kDa                 |
| 1,01 | TREM1                   | triggering receptor expressed on myeloid cells 1                                 |
| 1,01 | TCTA                    | T-cell leukemia translocation altered                                            |
| 1,01 | LRP10                   | LDL receptor related protein 10                                                  |
| 1,01 | ZNF865                  | zinc finger protein 865                                                          |
| 1,01 | PRF1                    | perforin 1 (pore forming protein)                                                |
| 1,01 | LRP6                    | LDL receptor related protein 6                                                   |
| 1,01 | RPS12                   | ribosomal protein S12                                                            |
| 1,01 | NME4                    | NME/NM23 nucleoside diphosphate kinase 4                                         |
| 1,01 | C10orf55                | chromosome 10 open reading frame 55                                              |
| 1,01 | MXD4; MIR4800           | MAX dimerization protein 4; microRNA 4800                                        |
| 1,01 | P2RY6                   | pyrimidinergic receptor P2Y, G-protein coupled, 6                                |
| 1,01 | MKRN2                   | makorin ring finger protein 2                                                    |
| 1,01 | TJP1                    | tight junction protein 1                                                         |
| 1,01 | C1orf64                 | chromosome 1 open reading frame 64                                               |
| 1,01 | SLC28A1                 | solute carrier family 28 (concentrative nucleoside<br>transporter), member 1     |
| 1,01 | TOMM40                  | translocase of outer mitochondrial membrane 40<br>homolog (yeast)                |
| 1,01 | ABCC5                   | ATP binding cassette subfamily C member 5                                        |
| 1,01 | TADA3                   | transcriptional adaptor 3                                                        |
| 1,01 | PGC                     | progastricsin (pepsinogen C)                                                     |
| 1,01 | GPRIN3                  | GPRIN family member 3                                                            |
| 1,01 | DALRD3                  | DALR anticodon binding domain containing 3                                       |
| 1,01 | C2CD4C                  | C2 calcium-dependent domain containing 4C                                        |
| 1,01 | ATP5L                   | ATP synthase, H <sup>+</sup> transporting, mitochondrial Fo<br>complex subunit G |
| 1,01 | PPP1R12B                | protein phosphatase 1, regulatory subunit 12B                                    |
| 1,01 | REXO4                   | REX4 homolog, 3-5 exonuclease                                                    |
| 1,01 | KIN                     | Kin17 DNA and RNA binding protein                                                |
| 1,01 | POLR1A                  | polymerase (RNA) I polypeptide A                                                 |
| 1,01 | NXPH3                   | neurexophilin 3                                                                  |
| 1,01 | WBSCR22                 | Williams Beuren syndrome chromosome region 22                                    |
| 1,01 | IL6ST                   | interleukin 6 signal transducer                                                  |
| 1,01 | TACSTD2                 | tumor-associated calcium signal transducer 2                                     |
| 1,01 | PRKD2                   | protein kinase D2                                                                |
| 1,01 | APMAP                   | adipocyte plasma membrane associated protein                                     |
| 1,01 | BANK1                   | B-cell scaffold protein with ankyrin repeats 1                                   |
| 1,01 | LARS                    | leucyl-tRNA synthetase                                                           |

|      |                         |                                                                                                                             |
|------|-------------------------|-----------------------------------------------------------------------------------------------------------------------------|
| 1,01 | PDGFB                   | platelet-derived growth factor beta polypeptide                                                                             |
| 1,01 | NRG2                    | neuregulin 2                                                                                                                |
| 1,01 | RIMKLB                  | ribosomal modification protein rimK-like family member B                                                                    |
| 1,01 | DHX15                   | DEAH (Asp-Glu-Ala-His) box helicase 15                                                                                      |
| 1,01 | RP11-325B23.2;<br>OR5H8 | novel transcript; olfactory receptor, family 5, subfamily H, member 8 (gene/pseudogene) [Source:HGNC Symbol;Acc:HGNC:14773] |
| 1,01 | TMCO5A                  | transmembrane and coiled-coil domains 5A                                                                                    |
| 1,01 | RAB5A                   | RAB5A, member RAS oncogene family                                                                                           |
| 1,01 | ZNF665                  | zinc finger protein 665                                                                                                     |
| 1,01 | CBLN1                   | cerebellin 1 precursor                                                                                                      |
| 1,01 | TGOLN2                  | trans-golgi network protein 2                                                                                               |
| 1,01 | OSGEP                   | O-sialoglycoprotein endopeptidase                                                                                           |
| 1,01 | NPC1                    | Niemann-Pick disease, type C1                                                                                               |
| 1,01 | ABCB5                   | ATP binding cassette subfamily B member 5                                                                                   |
| 1,01 | TRAPPC2                 | trafficking protein particle complex 2                                                                                      |
| 1,01 | PIK3R6                  | phosphoinositide-3-kinase, regulatory subunit 6                                                                             |
| 1,01 | C7orf71                 | chromosome 7 open reading frame 71                                                                                          |
| 1,01 | TUBG1                   | tubulin, gamma 1                                                                                                            |
| 1,01 | OVCH1                   | ovochymase 1                                                                                                                |
| 1,01 | ALG10                   | ALG10, alpha-1,2-glucosyltransferase                                                                                        |
| 1,01 | THRA                    | thyroid hormone receptor, alpha                                                                                             |
| 1,01 | ZNF197                  | zinc finger protein 197                                                                                                     |
| 1,01 | TNFRSF10B               | tumor necrosis factor receptor superfamily, member 10b                                                                      |
| 1,01 | ALDH5A1                 | aldehyde dehydrogenase 5 family, member A1                                                                                  |
| 1,01 | SLC9B1                  | solute carrier family 9, subfamily B (NHA1, cation proton antiporter 1), member 1                                           |
| 1,01 | THEM6                   | thioesterase superfamily member 6                                                                                           |
| 1,01 | PTBP3                   | polypyrimidine tract binding protein 3                                                                                      |
| 1,01 | PTPN9                   | protein tyrosine phosphatase, non-receptor type 9                                                                           |
| 1,01 | HS3ST6                  | heparan sulfate (glucosamine) 3-O-sulfotransferase 6                                                                        |
| 1,01 | CLEC10A                 | C-type lectin domain family 10, member A                                                                                    |
| 1,01 | TNFRSF13C;<br>MIR378I   | tumor necrosis factor receptor superfamily, member 13C; microRNA 378i                                                       |
| 1,01 | CD7                     | CD7 molecule                                                                                                                |
| 1,01 | CRYBB2                  | crystallin beta B2                                                                                                          |
| 1,01 | SLC4A9                  | solute carrier family 4, sodium bicarbonate cotransporter, member 9                                                         |
| 1,01 | CYP21A1P;<br>CYP21A2    | cytochrome P450, family 21, subfamily A, polypeptide 1 pseudogene; cytochrome P450, family 21, subfamily A, polypeptide 2   |
| 1,01 | STARD3NL                | STARD3 N-terminal like                                                                                                      |
| 1,01 | RPUSD4                  | RNA pseudouridylate synthase domain containing 4                                                                            |
| 1,01 | GAK                     | cyclin G associated kinase                                                                                                  |
| 1,01 | GLE1                    | GLE1 RNA export mediator                                                                                                    |
| 1,01 | ATF1                    | activating transcription factor 1                                                                                           |
| 1,01 | OR5AC2                  | olfactory receptor, family 5, subfamily AC, member 2                                                                        |

|      |                        |                                                                                                                                                                                                                                                                                                                                                        |
|------|------------------------|--------------------------------------------------------------------------------------------------------------------------------------------------------------------------------------------------------------------------------------------------------------------------------------------------------------------------------------------------------|
| 1,01 | RP11-484D2.4;<br>TTC17 | novel transcript, sense overlapping TTC17; Transcript Identified by AceView, Entrez Gene ID(s) 55761                                                                                                                                                                                                                                                   |
| 1,01 | NSMCE1                 | NSE1 homolog, SMC5-SMC6 complex component                                                                                                                                                                                                                                                                                                              |
| 1,01 | INPP5K                 | inositol polyphosphate-5-phosphatase K                                                                                                                                                                                                                                                                                                                 |
| 1,01 | TMEM47                 | transmembrane protein 47                                                                                                                                                                                                                                                                                                                               |
| 1,01 | LRRN2                  | leucine rich repeat neuronal 2                                                                                                                                                                                                                                                                                                                         |
| 1,01 | GCC1                   | GRIP and coiled-coil domain containing 1                                                                                                                                                                                                                                                                                                               |
| 1,01 | KLRG1                  | killer cell lectin-like receptor subfamily G, member 1                                                                                                                                                                                                                                                                                                 |
| 1,01 | ARHGAP10               | Rho GTPase activating protein 10                                                                                                                                                                                                                                                                                                                       |
| 1,01 | PMPCA                  | peptidase (mitochondrial processing) alpha                                                                                                                                                                                                                                                                                                             |
| 1,01 | TRMT1                  | tRNA methyltransferase 1                                                                                                                                                                                                                                                                                                                               |
| 1,01 | CHCHD2                 | coiled-coil-helix-coiled-coil-helix domain containing 2                                                                                                                                                                                                                                                                                                |
| 1,01 | RPL21                  | ribosomal protein L21                                                                                                                                                                                                                                                                                                                                  |
| 1,01 | EVX1                   | even-skipped homeobox 1                                                                                                                                                                                                                                                                                                                                |
| 1,01 | RPS19                  | ribosomal protein S19                                                                                                                                                                                                                                                                                                                                  |
| 1,01 | HOOK3                  | hook microtubule-tethering protein 3                                                                                                                                                                                                                                                                                                                   |
| 1,01 | CACYBP                 | calcyclin binding protein                                                                                                                                                                                                                                                                                                                              |
| 1,01 | CISD2                  | CDGSH iron sulfur domain 2                                                                                                                                                                                                                                                                                                                             |
| 1,01 | SPIRE2                 | spire-type actin nucleation factor 2                                                                                                                                                                                                                                                                                                                   |
| 1,01 | SYNGR1                 | synaptogyrin 1                                                                                                                                                                                                                                                                                                                                         |
| 1,01 | ARL16                  | ADP-ribosylation factor like GTPase 16                                                                                                                                                                                                                                                                                                                 |
| 1,01 | STK19                  | Homo sapiens serine/threonine kinase 19 (STK19), transcript variant 1, mRNA.; Homo sapiens serine/threonine kinase 19 (STK19), transcript variant 2, mRNA.; Homo sapiens serine/threonine kinase 19 (STK19), transcript variant 3, non-coding RNA.; Homo sapiens serine/threonine kinase 19, mRNA (cDNA clone MGC:117388 IMAGE:5165123), complete cds. |
| 1,01 | CTF1                   | cardiotrophin 1                                                                                                                                                                                                                                                                                                                                        |
| 1,01 | MAP3K5                 | mitogen-activated protein kinase kinase kinase 5                                                                                                                                                                                                                                                                                                       |
| 1,01 | HMGN4                  | high mobility group nucleosomal binding domain 4                                                                                                                                                                                                                                                                                                       |
| 1,01 | ANKRD34A               | ankyrin repeat domain 34A                                                                                                                                                                                                                                                                                                                              |
| 1,01 | SLC30A1                | solute carrier family 30 (zinc transporter), member 1                                                                                                                                                                                                                                                                                                  |
| 1,01 | CBR4                   | carbonyl reductase 4                                                                                                                                                                                                                                                                                                                                   |
| 1,01 | POLR1B                 | polymerase (RNA) I polypeptide B                                                                                                                                                                                                                                                                                                                       |
| 1,01 | ZDHHC2                 | zinc finger, DHHC-type containing 2                                                                                                                                                                                                                                                                                                                    |
| 1,01 | RGS7                   | regulator of G-protein signaling 7                                                                                                                                                                                                                                                                                                                     |
| 1,01 | POLD2                  | polymerase (DNA directed), delta 2, accessory subunit                                                                                                                                                                                                                                                                                                  |
| 1,01 | ING2                   | inhibitor of growth family member 2                                                                                                                                                                                                                                                                                                                    |
| 1,01 | ARMCX2                 | armadillo repeat containing, X-linked 2                                                                                                                                                                                                                                                                                                                |
| 1,01 | TMED10                 | transmembrane p24 trafficking protein 10                                                                                                                                                                                                                                                                                                               |
| 1,01 | CCDC84                 | coiled-coil domain containing 84                                                                                                                                                                                                                                                                                                                       |
| 1,01 | LZIC                   | leucine zipper and CTNNBIP1 domain containing                                                                                                                                                                                                                                                                                                          |
| 1,01 | SPATA5                 | spermatogenesis associated 5                                                                                                                                                                                                                                                                                                                           |

|      |                                        |                                                                                                                                                                                                                                                                                                                                                                                                                                                                                                         |
|------|----------------------------------------|---------------------------------------------------------------------------------------------------------------------------------------------------------------------------------------------------------------------------------------------------------------------------------------------------------------------------------------------------------------------------------------------------------------------------------------------------------------------------------------------------------|
| 1,01 | LOC100130691;<br>AC074286.1;<br>NFE2L2 | uncharacterized LOC100130691; Transcript Identified by AceView, Entrez Gene ID(s) 100130691; 4780, RefSeq ID(s) NR_026966; novel transcript                                                                                                                                                                                                                                                                                                                                                             |
| 1,01 | IL3RA                                  | Homo sapiens interleukin 3 receptor, alpha (low affinity) (IL3RA), transcript variant 2, mRNA.; Homo sapiens interleukin 3 receptor, alpha (low affinity) (IL3RA), transcript variant 1, mRNA.; interleukin 3 receptor, alpha (low affinity) [Source:HGNC Symbol;Acc:HGNC:6012]; Homo sapiens interleukin 3 receptor, alpha (low affinity), mRNA (cDNA clone MGC:34174 IMAGE:5167281), complete cds.; Salzman2013 ANNOTATED, CDS, coding, INTERNAL, OVCODE, OVERLAPTX, OVEXON best transcript NM_002183 |
| 1,01 | ARMC1                                  | armadillo repeat containing 1                                                                                                                                                                                                                                                                                                                                                                                                                                                                           |
| 1,01 | GRIA2                                  | Transcript Identified by AceView, Entrez Gene ID(s) 2891                                                                                                                                                                                                                                                                                                                                                                                                                                                |
| 1,01 | HERC3                                  | HECT and RLD domain containing E3 ubiquitin protein ligase 3                                                                                                                                                                                                                                                                                                                                                                                                                                            |
| 1,01 | PHGDH                                  | phosphoglycerate dehydrogenase                                                                                                                                                                                                                                                                                                                                                                                                                                                                          |
| 1,01 | ACOT1                                  | acyl-CoA thioesterase 1                                                                                                                                                                                                                                                                                                                                                                                                                                                                                 |
| 1,01 | PRAMEF1                                | PRAME family member 1                                                                                                                                                                                                                                                                                                                                                                                                                                                                                   |
| 1,01 | KCTD10                                 | potassium channel tetramerization domain containing 10                                                                                                                                                                                                                                                                                                                                                                                                                                                  |
| 1,01 | PRPS1                                  | phosphoribosyl pyrophosphate synthetase 1                                                                                                                                                                                                                                                                                                                                                                                                                                                               |
| 1,01 | DAB2IP                                 | DAB2 interacting protein                                                                                                                                                                                                                                                                                                                                                                                                                                                                                |
| 1,01 | TBC1D23                                | TBC1 domain family, member 23                                                                                                                                                                                                                                                                                                                                                                                                                                                                           |
| 1,01 | SNTN                                   | sentan, cilia apical structure protein                                                                                                                                                                                                                                                                                                                                                                                                                                                                  |
| 1,01 | UBE2B                                  | ubiquitin conjugating enzyme E2B                                                                                                                                                                                                                                                                                                                                                                                                                                                                        |
| 1,01 | CLIP2                                  | CAP-GLY domain containing linker protein 2                                                                                                                                                                                                                                                                                                                                                                                                                                                              |
| 1,01 | FGFRL1                                 | fibroblast growth factor receptor-like 1                                                                                                                                                                                                                                                                                                                                                                                                                                                                |
| 1,01 | FUS                                    | FUS RNA binding protein                                                                                                                                                                                                                                                                                                                                                                                                                                                                                 |
| 1,01 | ZNF23                                  | zinc finger protein 23                                                                                                                                                                                                                                                                                                                                                                                                                                                                                  |
| 1,01 | VPS26A                                 | VPS26 retromer complex component A                                                                                                                                                                                                                                                                                                                                                                                                                                                                      |
| 1,01 | BCKDHB                                 | branched chain keto acid dehydrogenase E1, beta polypeptide                                                                                                                                                                                                                                                                                                                                                                                                                                             |
| 1,01 | LY6G6F                                 | lymphocyte antigen 6 complex, locus G6F                                                                                                                                                                                                                                                                                                                                                                                                                                                                 |
| 1,01 | SLC29A3                                | solute carrier family 29 (equilibrative nucleoside transporter), member 3                                                                                                                                                                                                                                                                                                                                                                                                                               |
| 1,01 | KAT6B                                  | K(lysine) acetyltransferase 6B                                                                                                                                                                                                                                                                                                                                                                                                                                                                          |
| 1,01 | ENOPH1                                 | enolase-phosphatase 1                                                                                                                                                                                                                                                                                                                                                                                                                                                                                   |
| 1,01 | RAB33B                                 | RAB33B, member RAS oncogene family                                                                                                                                                                                                                                                                                                                                                                                                                                                                      |
| 1,01 | RUNX1                                  | runt-related transcription factor 1                                                                                                                                                                                                                                                                                                                                                                                                                                                                     |
| 1,01 | TBC1D25                                | TBC1 domain family, member 25                                                                                                                                                                                                                                                                                                                                                                                                                                                                           |
| 1,01 | RABL2B                                 | RAB, member of RAS oncogene family-like 2B                                                                                                                                                                                                                                                                                                                                                                                                                                                              |
| 1,01 | SUB1                                   | SUB1 homolog, transcriptional regulator                                                                                                                                                                                                                                                                                                                                                                                                                                                                 |
| 1,01 | MRT04                                  | MRT4 homolog, ribosome maturation factor                                                                                                                                                                                                                                                                                                                                                                                                                                                                |
| 1,01 | WIPF3                                  | WAS/WASL interacting protein family, member 3                                                                                                                                                                                                                                                                                                                                                                                                                                                           |
| 1,01 | SLC25A10                               | solute carrier family 25 (mitochondrial carrier; dicarboxylate transporter), member 10                                                                                                                                                                                                                                                                                                                                                                                                                  |

|      |                           |                                                                                                                             |
|------|---------------------------|-----------------------------------------------------------------------------------------------------------------------------|
| 1,01 | MAGEH1                    | MAGE family member H1                                                                                                       |
| 1,01 | PTPN11                    | protein tyrosine phosphatase, non-receptor type 11                                                                          |
| 1,01 | ZNF142                    | zinc finger protein 142                                                                                                     |
| 1,01 | DRD3                      | dopamine receptor D3                                                                                                        |
| 1,01 | CDS2                      | CDP-diacylglycerol synthase 2                                                                                               |
| 1,01 | EDN3                      | endothelin 3                                                                                                                |
| 1,01 | BTBD6                     | BTB (POZ) domain containing 6                                                                                               |
| 1,01 | SMN1                      | survival of motor neuron 1, telomeric                                                                                       |
| 1,01 | PYCARD                    | PYD and CARD domain containing                                                                                              |
| 1,01 | NPIA7                     | nuclear pore complex interacting protein family, member A7                                                                  |
| 1,01 | USO1                      | USO1 vesicle transport factor                                                                                               |
| 1,01 | LUC7L3                    | LUC7-like 3 pre-mRNA splicing factor                                                                                        |
| 1,01 | EGFL6                     | EGF-like-domain, multiple 6                                                                                                 |
| 1,01 | UPK3B                     | uroplakin 3B                                                                                                                |
| 1,01 | OR4F6                     | olfactory receptor, family 4, subfamily F, member 6                                                                         |
| 1,01 | MIR1199                   | microRNA 1199                                                                                                               |
| 1,01 | RBP5                      | retinol binding protein 5, cellular                                                                                         |
| 1,01 | FAM92B                    | family with sequence similarity 92, member B                                                                                |
| 1,01 | ARHGAP44                  | Rho GTPase activating protein 44                                                                                            |
| 1,01 | SLC4A7                    | solute carrier family 4, sodium bicarbonate cotransporter, member 7                                                         |
| 1,01 | EPB41L5                   | erythrocyte membrane protein band 4.1 like 5                                                                                |
| 1,01 | WDR76                     | WD repeat domain 76                                                                                                         |
| 1,01 | PEBP1                     | phosphatidylethanolamine binding protein 1                                                                                  |
| 1,01 | PLPPR1                    | phospholipid phosphatase related 1                                                                                          |
| 1,01 | HERC2P2                   | hect domain and RLD 2 pseudogene 2                                                                                          |
| 1,01 | C11orf49                  | chromosome 11 open reading frame 49                                                                                         |
| 1,01 | PCBD1                     | pterin-4 alpha-carbinolamine dehydratase/dimerization cofactor of hepatocyte nuclear factor 1 alpha                         |
| 1,01 | GFM2                      | G elongation factor, mitochondrial 2                                                                                        |
| 1,01 | RRN3                      | RRN3 homolog, RNA polymerase I transcription factor                                                                         |
| 1,01 | ZNF816-ZNF321P            | ZNF816-ZNF321P readthrough                                                                                                  |
| 1,01 | SS18L2                    | synovial sarcoma translocation gene on chromosome 18-like 2                                                                 |
| 1,01 | OR2L8                     | olfactory receptor, family 2, subfamily L, member 8 (gene/pseudogene)                                                       |
| 1,01 | FXYP6; FXYP6-FXYP2; FXYP2 | FXYP domain containing ion transport regulator 6; FXYP6-FXYP2 readthrough; FXYP domain containing ion transport regulator 2 |
| 1,01 | RASSF6                    | Ras association (RalGDS/AF-6) domain family member 6                                                                        |
| 1,01 | KRTAP7-1                  | keratin associated protein 7-1 (gene/pseudogene)                                                                            |
| 1,01 | RASGRP4                   | RAS guanyl releasing protein 4                                                                                              |
| 1,01 | EPHB3                     | EPH receptor B3                                                                                                             |
| 1,01 | MRPL35                    | mitochondrial ribosomal protein L35                                                                                         |
| 1,01 | RSU1                      | Ras suppressor protein 1                                                                                                    |

|      |                |                                                                                |
|------|----------------|--------------------------------------------------------------------------------|
| 1,01 | FAM107A        | family with sequence similarity 107, member A                                  |
| 1,01 | IPO13          | importin 13                                                                    |
| 1,01 | SETD3          | SET domain containing 3                                                        |
| 1,01 | DLG3           | discs, large homolog 3 (Drosophila)                                            |
| 1,01 | REEP6          | receptor accessory protein 6                                                   |
| 1,01 | SNED1          | Memczak2013 ALT_DONOR, coding, INTERNAL, intronic best transcript NM_001080437 |
| 1,01 | ECT2           | epithelial cell transforming 2                                                 |
| 1,01 | ZNF618         | zinc finger protein 618                                                        |
| 1,01 | TCTN3          | tectonic family member 3                                                       |
| 1,01 | PNP            | purine nucleoside phosphorylase                                                |
| 1,01 | PNMA1          | paraneoplastic Ma antigen 1                                                    |
| 1,01 | SMIM6          | small integral membrane protein 6                                              |
| 1,01 | SENP7          | SUMO1/sentrin specific peptidase 7                                             |
| 1,01 | INSL5          | insulin-like 5                                                                 |
| 1,01 | ZNF850         | zinc finger protein 850                                                        |
| 1,01 | RAP2C          | RAP2C, member of RAS oncogene family                                           |
| 1,01 | SERINC4        | serine incorporator 4                                                          |
| 1,01 | GPX5           | glutathione peroxidase 5                                                       |
| 1,01 | FRG2C          | FSHD region gene 2 family, member C                                            |
| 1,01 | EIF3M          | eukaryotic translation initiation factor 3, subunit M                          |
| 1,01 | FAM170B        | family with sequence similarity 170, member B                                  |
| 1,01 | CEP78          | centrosomal protein 78kDa                                                      |
| 1,01 | MARCH4         | membrane associated ring finger 4                                              |
| 1,01 | NRG4           | neuregulin 4                                                                   |
| 1,01 | CCL7           | chemokine (C-C motif) ligand 7                                                 |
| 1,01 | METTL8         | methyltransferase like 8                                                       |
| 1,01 | OR52L1         | olfactory receptor, family 52, subfamily L, member 1                           |
| 1,01 | AGGF1          | angiogenic factor with G-patch and FHA domains 1                               |
| 1,01 | MERTK          | MER proto-oncogene, tyrosine kinase                                            |
| 1,01 | HRK            | harakiri, BCL2 interacting protein                                             |
| 1,01 | ZNF787         | zinc finger protein 787                                                        |
| 1,01 | LRRC73         | leucine rich repeat containing 73                                              |
| 1,01 | HIST1H2BA      | histone cluster 1, H2ba                                                        |
| 1,01 | TRPC4          | transient receptor potential cation channel, subfamily C, member 4             |
| 1,01 | PRSS12         | protease, serine, 12 (neurotrypsin, motopsin)                                  |
| 1,01 | C22orf39; HIRA | chromosome 22 open reading frame 39; histone cell cycle regulator              |
| 1,01 | UBE2O          | ubiquitin-conjugating enzyme E2O                                               |
| 1,01 | CD160          | CD160 molecule                                                                 |
| 1,01 | TIAM2          | T-cell lymphoma invasion and metastasis 2                                      |
| 1,01 | IGSF5          | immunoglobulin superfamily, member 5                                           |
| 1,01 | PSMA6          | proteasome subunit alpha 6                                                     |
| 1,01 | CUEDC1         | CUE domain containing 1                                                        |
| 1,01 | P2RX5          | purinergic receptor P2X, ligand gated ion channel, 5                           |
| 1,01 | GPR137         | G protein-coupled receptor 137                                                 |
| 1,01 | SNX24          | sorting nexin 24                                                               |
| 1,01 | CFC1B; CFC1    | cripto, FRL-1, cryptic family 1B; cripto, FRL-1, cryptic family 1              |

|      |                    |                                                                                                    |
|------|--------------------|----------------------------------------------------------------------------------------------------|
| 1,01 | PIP5KL1            | phosphatidylinositol-4-phosphate 5-kinase-like 1                                                   |
| 1,01 | SLC39A3            | solute carrier family 39 (zinc transporter), member 3                                              |
| 1,01 | C16orf54           | chromosome 16 open reading frame 54                                                                |
| 1,01 | PRPS2              | phosphoribosyl pyrophosphate synthetase 2                                                          |
| 1,01 | CFAP53             | cilia and flagella associated protein 53                                                           |
| 1,01 | KDM7A              | lysine (K)-specific demethylase 7A                                                                 |
| 1,01 | TM4SF1-AS1         | TM4SF1 antisense RNA 1                                                                             |
| 1,01 | EIF4G2;<br>SNORD97 | eukaryotic translation initiation factor 4 gamma, 2;<br>small nucleolar RNA, C/D box 97            |
| 1,01 | SLC22A11           | solute carrier family 22 (organic anion/urate transporter), member 11                              |
| 1,01 | KRTAP5-5           | keratin associated protein 5-5                                                                     |
| 1,01 | ITGB5              | integrin beta 5                                                                                    |
| 1,01 | PEBP1              | Memczak2013 ANTISENSE, coding, INTERNAL,<br>UTR3 best transcript NM_002567                         |
| 1,01 | CHMP7              | charged multivesicular body protein 7                                                              |
| 1,01 | DYNLL2             | dynein, light chain, LC8-type 2                                                                    |
| 1,01 | HS6ST3             | heparan sulfate 6-O-sulfotransferase 3                                                             |
| 1,01 | ZFP3               | ZFP3 zinc finger protein                                                                           |
| 1,01 | CLCN4              | chloride channel, voltage-sensitive 4                                                              |
| 1,01 | HIST1H2AI          | histone cluster 1, H2ai                                                                            |
| 1,01 | TYR                | tyrosinase                                                                                         |
| 1,01 | VAMP8              | vesicle associated membrane protein 8                                                              |
| 1,01 | LINC01465          | long intergenic non-protein coding RNA 1465                                                        |
| 1,01 | ZNF525             | zinc finger protein 525                                                                            |
| 1,01 | PPIAL4G            | peptidylprolyl isomerase A (cyclophilin A)-like 4G                                                 |
| 1,01 | ADAM8              | ADAM metallopeptidase domain 8                                                                     |
| 1,01 | TMEM208            | transmembrane protein 208                                                                          |
| 1,01 | COX6A1             | cytochrome c oxidase subunit VIa polypeptide 1                                                     |
| 1,01 | CREB3              | cAMP responsive element binding protein 3                                                          |
| 1,01 | PPP2R5E            | protein phosphatase 2, regulatory subunit B, epsilon<br>isoform                                    |
| 1,01 | LNPEP              | Memczak2013 ANTISENSE, coding, INTERNAL,<br>UTR3 best transcript NM_175920                         |
| 1,01 | ENTPD3             | ectonucleoside triphosphate diphosphohydrolase 3                                                   |
| 1,01 | AXIN1              | axin 1                                                                                             |
| 1,01 | C1orf43            | chromosome 1 open reading frame 43                                                                 |
| 1,01 | SUSD1              | sushi domain containing 1                                                                          |
| 1,01 | RABGEF1            | RAB guanine nucleotide exchange factor (GEF) 1                                                     |
| 1,01 | PRAMEF33P          | PRAME family member 33, pseudogene                                                                 |
| 1,01 | B3GALT2            | UDP-Gal:betaGlcNAc beta 1,3-galactosyltransferase 2                                                |
| 1,01 | USP16              | ubiquitin specific peptidase 16                                                                    |
| 1,01 | PCYT1A             | phosphate cytidyltransferase 1, choline, alpha                                                     |
| 1,01 | BACH2              | Memczak2013 ALT_ACCEPTOR, ALT_DONOR,<br>coding, INTERNAL, intronic best transcript<br>NM_001170794 |
| 1,01 | CAPN2              | calpain 2, (m/II) large subunit                                                                    |
| 1,01 | SLC47A2            | solute carrier family 47 (multidrug and toxin<br>extrusion), member 2                              |

|      |                       |                                                                                   |
|------|-----------------------|-----------------------------------------------------------------------------------|
| 1,01 | ADGRE5                | adhesion G protein-coupled receptor E5                                            |
| 1,01 | NUFIP2                | nuclear fragile X mental retardation protein interacting protein 2                |
| 1,01 | MRPS5                 | mitochondrial ribosomal protein S5                                                |
| 1,01 | C9orf9                | chromosome 9 open reading frame 9                                                 |
| 1,01 | HIST2H4B;<br>HIST2H4A | histone cluster 2, H4b; histone cluster 2, H4a                                    |
| 1,01 | MRPL19                | mitochondrial ribosomal protein L19                                               |
| 1,01 | SLC9A9                | solute carrier family 9, subfamily A (NHE9, cation proton antiporter 9), member 9 |
| 1,01 | GALNTL6               | polypeptide N-acetylgalactosaminyltransferase-like 6                              |
| 1,01 | HLA-DQA1              | major histocompatibility complex, class II, DQ alpha 1                            |
| 1,01 | TNNI3                 | troponin I type 3 (cardiac)                                                       |
| 1,01 | NACA                  | nascent polypeptide-associated complex alpha subunit                              |
| 1,01 | AICDA                 | activation-induced cytidine deaminase                                             |
| 1,01 | TMCC3;<br>MIR7844     | transmembrane and coiled-coil domain family 3;<br>microRNA 7844                   |
| 1,01 | CCDC169               | coiled-coil domain containing 169                                                 |
| 1,01 | RPL23AP5              | ribosomal protein L23a pseudogene 5                                               |
| 1,01 | EIF1B                 | eukaryotic translation initiation factor 1B                                       |
| 1,01 | MTFR2                 | mitochondrial fission regulator 2                                                 |
| 1,01 | SAMD10                | sterile alpha motif domain containing 10                                          |
| 1,01 | USP49                 | ubiquitin specific peptidase 49                                                   |
| 1,01 | RGS8                  | regulator of G-protein signaling 8                                                |
| 1,01 | STX16                 | syntaxin 16                                                                       |
| 1,01 | RNF175                | ring finger protein 175                                                           |
| 1,01 | CD3EAP                | CD3e molecule, epsilon associated protein                                         |
| 1,01 | TCERG1                | transcription elongation regulator 1                                              |
| 1,01 | C20orf196             | Transcript Identified by AceView, Entrez Gene ID(s)<br>149840                     |
| 1,01 | INAFM2                | InaF-motif containing 2                                                           |
| 1,01 | GOSR2                 | golgi SNAP receptor complex member 2                                              |
| 1,01 | MCM3                  | minichromosome maintenance complex component 3                                    |
| 1,01 | MYH13                 | myosin, heavy chain 13, skeletal muscle                                           |
| 1,01 | LINC01567             | long intergenic non-protein coding RNA 1567                                       |
| 1,01 | TXNDC5                | thioredoxin domain containing 5 (endoplasmic<br>reticulum)                        |
| 1,01 | KIF3B                 | kinesin family member 3B                                                          |
| 1,01 | ZNF724P               | zinc finger protein 724, pseudogene                                               |
| 1,01 | CWC15                 | CWC15 spliceosome-associated protein                                              |
| 1,00 | SAG                   | S-antigen; retina and pineal gland (arrestin)                                     |
| 1,00 | TMEM61                | transmembrane protein 61                                                          |
| 1,00 | PPP1R2                | protein phosphatase 1, regulatory (inhibitor) subunit 2                           |
| 1,00 | DYNC2H1               | dynein, cytoplasmic 2, heavy chain 1                                              |
| 1,00 | SPATA9                | spermatogenesis associated 9                                                      |
| 1,00 | HIST1H2BI             | histone cluster 1, H2bi                                                           |
| 1,00 | ATG16L1               | autophagy related 16-like 1                                                       |

|      |                |                                                                                     |
|------|----------------|-------------------------------------------------------------------------------------|
| 1,00 | TCEB1          | transcription elongation factor B (SIII), polypeptide 1 (15kDa, elongin C)          |
| 1,00 | CYP2C8         | cytochrome P450, family 2, subfamily C, polypeptide 8                               |
| 1,00 | PDLIM4         | PDZ and LIM domain 4                                                                |
| 1,00 | RNF115         | ring finger protein 115                                                             |
| 1,00 | RRNAD1         | ribosomal RNA adenine dimethylase domain containing 1                               |
| 1,00 | SMTNL1         | smoothelin-like 1                                                                   |
| 1,00 | STAR           | steroidogenic acute regulatory protein                                              |
| 1,00 | CXorf56        | chromosome X open reading frame 56                                                  |
| 1,00 | THAP8          | THAP domain containing 8                                                            |
| 1,00 | KANSL1         | KAT8 regulatory NSL complex subunit 1                                               |
| 1,00 | ATG16L1        | autophagy related 16-like 1                                                         |
| 1,00 | APBA2          | amyloid beta (A4) precursor protein-binding, family A, member 2                     |
| 1,00 | SMIM1          | small integral membrane protein 1 (Vel blood group)                                 |
| 1,00 | FBXL15         | F-box and leucine-rich repeat protein 15                                            |
| 1,00 | XPO1           | exportin 1                                                                          |
| 1,00 | ANLN           | anillin actin binding protein                                                       |
| 1,00 | FAM26D         | family with sequence similarity 26, member D                                        |
| 1,00 | KIF18B         | kinesin family member 18B                                                           |
| 1,00 | PTPMT1         | protein tyrosine phosphatase, mitochondrial 1                                       |
| 1,00 | CPAMD8         | C3 and PZP-like, alpha-2-macroglobulin domain containing 8                          |
| 1,00 | COL11A1        | collagen, type XI, alpha 1                                                          |
| 1,00 | C17orf53       | chromosome 17 open reading frame 53                                                 |
| 1,00 | LCE3E          | late cornified envelope 3E                                                          |
| 1,00 | REXO1L10P      | REX1, RNA exonuclease 1 homolog-like 10, pseudogene                                 |
| 1,00 | GRSF1          | G-rich RNA sequence binding factor 1                                                |
| 1,00 | KCNJ2          | potassium channel, inwardly rectifying subfamily J, member 2                        |
| 1,00 | MLXIP          | MLX interacting protein                                                             |
| 1,00 | SRP72          | signal recognition particle 72kDa                                                   |
| 1,00 | CEACAM20       | carcinoembryonic antigen-related cell adhesion molecule 20                          |
| 1,00 | MID1IP1        | MID1 interacting protein 1                                                          |
| 1,00 | GBP7           | guanylate binding protein 7                                                         |
| 1,00 | TOM1           | target of myb1 membrane trafficking protein                                         |
| 1,00 | PSMC5          | proteasome 26S subunit, ATPase 5                                                    |
| 1,00 | EEF1E1-BLOC1S5 | EEF1E1-BLOC1S5 readthrough (NMD candidate)                                          |
| 1,00 | DGKD           | diacylglycerol kinase, delta 130kDa                                                 |
| 1,00 | MUTYH          | mutY DNA glycosylase                                                                |
| 1,00 | IFT74          | intraflagellar transport 74                                                         |
| 1,00 | SARS           | seryl-tRNA synthetase                                                               |
| 1,00 | LINC00493      | long intergenic non-protein coding RNA 493                                          |
| 1,00 | PARP8          | Memczak2013 ANTISENSE, CDS, coding, INTERNAL, intronic best transcript NM_001178056 |

|      |                  |                                                                 |
|------|------------------|-----------------------------------------------------------------|
| 1,00 | AGTR1            | angiotensin II receptor, type 1                                 |
| 1,00 | WARS2            | tryptophanyl tRNA synthetase 2, mitochondrial                   |
| 1,00 | CBX3             | chromobox homolog 3                                             |
| 1,00 | GDAP1L1          | ganglioside induced differentiation associated protein 1-like 1 |
| 1,00 | ZNF3             | zinc finger protein 3                                           |
| 1,00 | EPRS             | glutamyl-prolyl-tRNA synthetase                                 |
| 1,00 | IRAK1; MIR718    | interleukin 1 receptor associated kinase 1; microRNA 718        |
| 1,00 | STX12            | syntaxin 12                                                     |
| 1,00 | KIF13B           | kinesin family member 13B                                       |
| 1,00 | IPO9             | importin 9                                                      |
| 1,00 | UNC5A            | unc-5 netrin receptor A                                         |
| 1,00 | SHFM1            | split hand/foot malformation (ectrodactyly) type 1              |
| 1,00 | C1QTNF7          | C1q and tumor necrosis factor related protein 7                 |
| 1,00 | UBA1             | ubiquitin-like modifier activating enzyme 1                     |
| 1,00 | CLCN3            | chloride channel, voltage-sensitive 3                           |
| 1,00 | NDUFB4           | NADH dehydrogenase (ubiquinone) 1 beta subcomplex, 4, 15kDa     |
| 1,00 | GAPDH            | glyceraldehyde-3-phosphate dehydrogenase                        |
| 1,00 | ANGPTL8          | angiopoietin like 8                                             |
| 1,00 | UNC119B; MIR4700 | unc-119 lipid binding chaperone B; microRNA 4700                |
| 1,00 | ARF4             | ADP-ribosylation factor 4                                       |
| 1,00 | FOXP2            | forkhead box P2                                                 |
| 1,00 | ZNF726; ZNF92P3  | zinc finger protein 726; zinc finger protein 92 pseudogene 3    |
| 1,00 | IPO4             | importin 4                                                      |
| 1,00 | LOX              | lysyl oxidase                                                   |
| 1,00 | KIAA2012         | KIAA2012                                                        |
| 1,00 | COX6B1           | cytochrome c oxidase subunit VIb polypeptide 1 (ubiquitous)     |
| 1,00 | C6orf222         | chromosome 6 open reading frame 222                             |
| 1,00 | KLF1             | Kruppel-like factor 1 (erythroid)                               |
| 1,00 | ANKS3            | ankyrin repeat and sterile alpha motif domain containing 3      |
| 1,00 | ZNF319           | zinc finger protein 319                                         |
| 1,00 | IFNAR1           | interferon (alpha, beta and omega) receptor 1                   |
| 1,00 | ADAMTS13         | ADAM metalloproteinase with thrombospondin type 1 motif 13      |
| 1,00 | OTOP1            | otopetrin 1                                                     |
| 1,00 | FEM1C            | fem-1 homolog c (C. elegans)                                    |
| 1,00 | ARHGAP35         | Rho GTPase activating protein 35                                |
| 1,00 | BTN3A3           | butyrophilin, subfamily 3, member A3                            |
| 1,00 | FTSJ3            | FtsJ homolog 3 (E. coli)                                        |
| 1,00 | EIF4E            | eukaryotic translation initiation factor 4E                     |
| 1,00 | PLIN4            | perilipin 4                                                     |
| 1,00 | PRPF19           | pre-mRNA processing factor 19                                   |
| 1,00 | CIPC             | CLOCK-interacting pacemaker                                     |
| 1,00 | TLR3             | toll-like receptor 3                                            |

|      |                                    |                                                                                                                                                                                                                                                                                                                                                                                                                                                               |
|------|------------------------------------|---------------------------------------------------------------------------------------------------------------------------------------------------------------------------------------------------------------------------------------------------------------------------------------------------------------------------------------------------------------------------------------------------------------------------------------------------------------|
| 1,00 | TSEN54                             | TSEN54 tRNA splicing endonuclease subunit                                                                                                                                                                                                                                                                                                                                                                                                                     |
| 1,00 | CACNA2D1                           | calcium channel, voltage-dependent, alpha 2/delta subunit 1                                                                                                                                                                                                                                                                                                                                                                                                   |
| 1,00 | ZBTB8B                             | zinc finger and BTB domain containing 8B                                                                                                                                                                                                                                                                                                                                                                                                                      |
| 1,00 | C10orf82                           | chromosome 10 open reading frame 82                                                                                                                                                                                                                                                                                                                                                                                                                           |
| 1,00 | ADAM8                              | Memczak2013 ANTISENSE, CDS, coding, INTERNAL best transcript NM_001109                                                                                                                                                                                                                                                                                                                                                                                        |
| 1,00 | THEGL                              | theg spermatid protein-like                                                                                                                                                                                                                                                                                                                                                                                                                                   |
| 1,00 | STRN                               | striatin, calmodulin binding protein                                                                                                                                                                                                                                                                                                                                                                                                                          |
| 1,00 | MANSC1                             | MANSC domain containing 1                                                                                                                                                                                                                                                                                                                                                                                                                                     |
| 1,00 | DARS                               | aspartyl-tRNA synthetase                                                                                                                                                                                                                                                                                                                                                                                                                                      |
| 1,00 | SLC19A3                            | solute carrier family 19 (thiamine transporter), member 3                                                                                                                                                                                                                                                                                                                                                                                                     |
| 1,00 | CHEK1                              | checkpoint kinase 1                                                                                                                                                                                                                                                                                                                                                                                                                                           |
| 1,00 | SDHAF4                             | succinate dehydrogenase complex assembly factor 4                                                                                                                                                                                                                                                                                                                                                                                                             |
| 1,00 | TISP43;<br>LOC646743;<br>LOC150527 | Homo sapiens uncharacterized LOC150527 (TISP43), transcript variant 1, non-coding RNA.; Homo sapiens uncharacterized LOC150527 (TISP43), transcript variant 2, non-coding RNA.; Homo sapiens uncharacterized LOC646743 (LOC646743), non-coding RNA.; Transcript Identified by AceView, Entrez Gene ID(s) 150527; Transcript Identified by AceView, Entrez Gene ID(s) 150527, RefSeq ID(s) NR_027313; uncharacterized LOC150527 [Source:EntrezGene;Acc:150527] |
| 1,00 | PRKAB2                             | protein kinase, AMP-activated, beta 2 non-catalytic subunit                                                                                                                                                                                                                                                                                                                                                                                                   |
| 1,00 | LCE1E                              | late cornified envelope 1E                                                                                                                                                                                                                                                                                                                                                                                                                                    |
| 1,00 | EMID1                              | EMI domain containing 1                                                                                                                                                                                                                                                                                                                                                                                                                                       |
| 1,00 | XPNPEP3                            | X-prolyl aminopeptidase 3, mitochondrial                                                                                                                                                                                                                                                                                                                                                                                                                      |
| 1,00 | FBXO18                             | F-box protein, helicase, 18                                                                                                                                                                                                                                                                                                                                                                                                                                   |
| 1,00 | NARS                               | asparaginyl-tRNA synthetase                                                                                                                                                                                                                                                                                                                                                                                                                                   |
| 1,00 | SLC36A3                            | solute carrier family 36, member 3                                                                                                                                                                                                                                                                                                                                                                                                                            |
| 1,00 | VEZT                               | vezatin, adherens junctions transmembrane protein                                                                                                                                                                                                                                                                                                                                                                                                             |
| 1,00 | STAP1                              | signal transducing adaptor family member 1                                                                                                                                                                                                                                                                                                                                                                                                                    |
| 1,00 | KRT25                              | keratin 25, type I                                                                                                                                                                                                                                                                                                                                                                                                                                            |
| 1,00 | SEPW1                              | selenoprotein W, 1                                                                                                                                                                                                                                                                                                                                                                                                                                            |
| 1,00 | HS3ST3A1                           | heparan sulfate (glucosamine) 3-O-sulfotransferase 3A1                                                                                                                                                                                                                                                                                                                                                                                                        |
| 1,00 | ZDHHC21                            | zinc finger, DHHC-type containing 21                                                                                                                                                                                                                                                                                                                                                                                                                          |
| 1,00 | LAMTOR1                            | late endosomal/lysosomal adaptor, MAPK and MTOR activator 1                                                                                                                                                                                                                                                                                                                                                                                                   |
| 1,00 | MITF                               | microphthalmia-associated transcription factor                                                                                                                                                                                                                                                                                                                                                                                                                |
| 1,00 | SLC19A2                            | solute carrier family 19 (thiamine transporter), member 2                                                                                                                                                                                                                                                                                                                                                                                                     |
| 1,00 | FOXO4L4                            | forkhead box D4-like 4                                                                                                                                                                                                                                                                                                                                                                                                                                        |
| 1,00 | SUCLG1                             | succinate-CoA ligase, alpha subunit                                                                                                                                                                                                                                                                                                                                                                                                                           |
| 1,00 | FRA10AC1                           | fragile site, folic acid type, rare, fra(10)(q23.3) or fra(10)(q24.2) candidate 1                                                                                                                                                                                                                                                                                                                                                                             |
| 1,00 | MDH2                               | malate dehydrogenase 2                                                                                                                                                                                                                                                                                                                                                                                                                                        |
| 1,00 | ZC3H3                              | zinc finger CCCH-type containing 3                                                                                                                                                                                                                                                                                                                                                                                                                            |

|      |            |                                                                                                      |
|------|------------|------------------------------------------------------------------------------------------------------|
| 1,00 | JSRP1      | junctional sarcoplasmic reticulum protein 1                                                          |
| 1,00 | GRAMD3     | GRAM domain containing 3                                                                             |
| 1,00 | F9         | coagulation factor IX                                                                                |
| 1,00 | FAM174A    | family with sequence similarity 174, member A                                                        |
| 1,00 | CTAGE8     | CTAGE family, member 8                                                                               |
| 1,00 | SUMO1      | small ubiquitin-like modifier 1                                                                      |
| 1,00 | MSANTD2    | Myb/SANT-like DNA-binding domain containing 2                                                        |
| 1,00 | VSIG10L    | V-set and immunoglobulin domain containing 10 like                                                   |
| 1,00 | MTHFD2     | methylenetetrahydrofolate dehydrogenase (NADP+ dependent) 2, methenyltetrahydrofolate cyclohydrolase |
| 1,00 | ORC5       | origin recognition complex subunit 5                                                                 |
| 1,00 | GLUL       | glutamate-ammonia ligase                                                                             |
| 1,00 | GFRAL      | GNDF family receptor alpha like                                                                      |
| 1,00 | RAB11FIP5  | RAB11 family interacting protein 5 (class I)                                                         |
| 1,00 | NXT1       | nuclear transport factor 2-like export factor 1                                                      |
| 1,00 | SH2D7      | SH2 domain containing 7                                                                              |
| 1,00 | SLC35F4    | solute carrier family 35, member F4                                                                  |
| 1,00 | TCHP       | trichoplein, keratin filament binding                                                                |
| 1,00 | THBS4      | thrombospondin 4                                                                                     |
| 1,00 | TM4SF19    | transmembrane 4 L six family member 19                                                               |
| 1,00 | PDE4C      | phosphodiesterase 4C, cAMP-specific                                                                  |
| 1,00 | KDM4E      | lysine (K)-specific demethylase 4E                                                                   |
| 1,00 | LYPD1      | LY6/PLAUR domain containing 1                                                                        |
| 1,00 | C7orf26    | chromosome 7 open reading frame 26                                                                   |
| 1,00 | UBR2       | ubiquitin protein ligase E3 component n-recogin 2                                                    |
| 1,00 | ISY1-RAB43 | ISY1-RAB43 readthrough                                                                               |
| 1,00 | CSPG5      | chondroitin sulfate proteoglycan 5 (neuroglycan C)                                                   |
| 1,00 | OXTR       | oxytocin receptor                                                                                    |
| 1,00 | MRPL16     | mitochondrial ribosomal protein L16                                                                  |
| 1,00 | SFMBT1     | Scm-like with four mbt domains 1                                                                     |
| 1,00 | C22orf46   | chromosome 22 open reading frame 46                                                                  |
| 1,00 | MANEA      | mannosidase, endo-alpha                                                                              |
| 1,00 | ACAT2      | acetyl-CoA acetyltransferase 2                                                                       |
| 1,00 | SLC7A5     | solute carrier family 7 (amino acid transporter light chain, L system), member 5                     |
| 1,00 | EML2-AS1   | EML2 antisense RNA 1                                                                                 |
| 1,00 | SIAH2      | siah E3 ubiquitin protein ligase 2                                                                   |
| 1,00 | ZDHHC22    | zinc finger, DHHC-type containing 22                                                                 |
| 1,00 | MBTD1      | mbt domain containing 1                                                                              |
| 1,00 | FLT4       | fms-related tyrosine kinase 4                                                                        |
| 1,00 | TJP3       | tight junction protein 3                                                                             |
| 1,00 | S100A16    | S100 calcium binding protein A16                                                                     |
| 1,00 | SEC23IP    | SEC23 interacting protein                                                                            |
| 1,00 | USP24      | ubiquitin specific peptidase 24                                                                      |
| 1,00 | HNRNPR     | heterogeneous nuclear ribonucleoprotein R                                                            |
| 1,00 | CCR10      | chemokine (C-C motif) receptor 10                                                                    |
| 1,00 | DEFB129    | defensin, beta 129                                                                                   |
| 1,00 | NDUFV2     | NADH dehydrogenase (ubiquinone) flavoprotein 2, 24kDa                                                |

|      |                 |                                                                                                   |
|------|-----------------|---------------------------------------------------------------------------------------------------|
| 1,00 | PCID2           | PCI domain containing 2                                                                           |
| 1,00 | ZNF891          | zinc finger protein 891                                                                           |
| 1,00 | CFAP47          | cilia and flagella associated protein 47                                                          |
| 1,00 | ERI2            | ERI1 exoribonuclease family member 2                                                              |
| 1,00 | CANT1           | calcium activated nucleotidase 1                                                                  |
| 1,00 | SMAD4           | SMAD family member 4                                                                              |
| 1,00 | CCR4            | chemokine (C-C motif) receptor 4                                                                  |
| 1,00 | HPCAL1          | hippocalcin-like 1                                                                                |
| 1,00 | LAMP2           | lysosomal-associated membrane protein 2                                                           |
| 1,00 | RFX5            | regulatory factor X, 5 (influences HLA class II expression)                                       |
| 1,00 | MB              | myoglobin                                                                                         |
| 1,00 | PROCR           | protein C receptor, endothelial                                                                   |
| 1,00 | VPS41           | vacuolar protein sorting 41 homolog (S. cerevisiae)                                               |
| 1,00 | DNPEP           | aspartyl aminopeptidase                                                                           |
| 1,00 | MTIF3           | mitochondrial translational initiation factor 3                                                   |
| 1,00 | SMARCB1         | SWI/SNF related, matrix associated, actin dependent regulator of chromatin, subfamily b, member 1 |
| 1,00 | ZNF791          | zinc finger protein 791                                                                           |
| 1,00 | PSMC4           | proteasome 26S subunit, ATPase 4 [Source:HGNC Symbol;Acc:HGNC:9551]                               |
| 1,00 | ATG16L1         | autophagy related 16-like 1                                                                       |
| 1,00 | ENTPD4; LOXL2   | ectonucleoside triphosphate diphosphohydrolase 4; lysyl oxidase-like 2                            |
| 1,00 | HNRNPUL1        | heterogeneous nuclear ribonucleoprotein U-like 1                                                  |
| 1,00 | CAMK2D          | calcium/calmodulin-dependent protein kinase II delta                                              |
| 1,00 | RBM28           | RNA binding motif protein 28                                                                      |
| 1,00 | CCDC68          | coiled-coil domain containing 68                                                                  |
| 1,00 | XCL1            | chemokine (C motif) ligand 1                                                                      |
| 1,00 | FAM196A         | family with sequence similarity 196, member A                                                     |
| 1,00 | HSPA1B; HSPA1A  | heat shock 70kDa protein 1B; heat shock 70kDa protein 1A                                          |
| 1,00 | CNBD1           | cyclic nucleotide binding domain containing 1                                                     |
| 1,00 | CELSR3; MIR4793 | cadherin, EGF LAG seven-pass G-type receptor 3; microRNA 4793                                     |
| 1,00 | RASA3           | RAS p21 protein activator 3                                                                       |
| 1,00 | SDS             | serine dehydratase                                                                                |
| 1,00 | C9orf78         | chromosome 9 open reading frame 78                                                                |
| 1,00 | FBL             | fibrillarin                                                                                       |
| 1,00 | ASAH2B          | N-acylsphingosine amidohydrolase (non-lysosomal ceramidase) 2B                                    |
| 1,00 | MOGS            | mannosyl-oligosaccharide glucosidase                                                              |
| 1,00 | RNF13           | ring finger protein 13                                                                            |
| 1,00 | DBNDD1          | dysbindin (dystrobrevin binding protein 1) domain containing 1                                    |
| 1,00 | PPP6R3          | protein phosphatase 6, regulatory subunit 3                                                       |
| 1,00 | MBNL2           | muscleblind-like splicing regulator 2                                                             |
| 1,00 | CRAMP1          | cramped chromatin regulator homolog 1                                                             |
| 1,00 | SPRY2           | sprouty RTK signaling antagonist 2                                                                |
| 1,00 | ZNF324B         | zinc finger protein 324B                                                                          |

|      |             |                                                                                           |
|------|-------------|-------------------------------------------------------------------------------------------|
| 1,00 | OR13C4      | olfactory receptor, family 13, subfamily C, member 4                                      |
| 1,00 | GFI1        | growth factor independent 1 transcription repressor                                       |
| 1,00 | C7orf34     | chromosome 7 open reading frame 34                                                        |
| 1,00 | MRPL15      | mitochondrial ribosomal protein L15                                                       |
| 1,00 | RPL5        | Memczak2013 ALT_ACCEPTOR, ALT_DONOR, coding, INTERNAL, intronic best transcript NM_000969 |
| 1,00 | CDCP1       | CUB domain containing protein 1                                                           |
| 1,00 | ZNF727      | zinc finger protein 727                                                                   |
| 1,00 | HIST3H3     | histone cluster 3, H3                                                                     |
| 1,00 | CCNT2       | cyclin T2                                                                                 |
| 1,00 | MAPK4       | mitogen-activated protein kinase 4                                                        |
| 1,00 | GALNS       | galactosamine (N-acetyl)-6-sulfatase                                                      |
| 1,00 | ZNF586      | zinc finger protein 586                                                                   |
| 1,00 | C1orf115    | chromosome 1 open reading frame 115                                                       |
| 1,00 | SATB1       | SATB homeobox 1                                                                           |
| 1,00 | GBA         | glucosidase, beta, acid                                                                   |
| 1,00 | ERCC3       | excision repair cross-complementation group 3                                             |
| 1,00 | PTEN        | phosphatase and tensin homolog                                                            |
| 1,00 | HAUS3; POLN | HAUS augmin like complex subunit 3; polymerase (DNA directed) nu                          |
| 1,00 | MYO19       | myosin XIX                                                                                |
| 1,00 | PPP3R1      | protein phosphatase 3, regulatory subunit B, alpha                                        |
| 1,00 | ITIH4       | inter-alpha-trypsin inhibitor heavy chain family, member 4                                |
| 1,00 | GOSR1       | golgi SNAP receptor complex member 1                                                      |
| 1,00 | CD247       | CD247 molecule                                                                            |
| 1,00 | TCTEX1D4    | Tctex1 domain containing 4                                                                |
| 1,00 | FIGNL1      | fidgetin-like 1                                                                           |
| 1,00 | GALNT7      | polypeptide N-acetylgalactosaminyltransferase 7                                           |
| 1,00 | TRAPPC4     | trafficking protein particle complex 4                                                    |
| 1,00 | CYP1A2      | cytochrome P450, family 1, subfamily A, polypeptide 2                                     |
| 1,00 | ETFDH       | electron-transferring-flavoprotein dehydrogenase                                          |
| 1,00 | EIF3E       | eukaryotic translation initiation factor 3, subunit E                                     |
| 1,00 | GPD1        | glycerol-3-phosphate dehydrogenase 1                                                      |
| 1,00 | RFX8        | RFX family member 8, lacking RFX DNA binding domain                                       |
| 1,00 | CREBRF      | CREB3 regulatory factor                                                                   |
| 1,00 | BCAP31      | B-cell receptor-associated protein 31                                                     |
| 1,00 | AP1S2       | adaptor-related protein complex 1 sigma 2 subunit                                         |
| 1,00 | HIST1H1C    | histone cluster 1, H1c                                                                    |
| 1,00 | HNRNPC      | heterogeneous nuclear ribonucleoprotein C (C1/C2)                                         |
| 1,00 | MTMR10      | myotubularin related protein 10                                                           |
| 1,00 | EMX2        | empty spiracles homeobox 2                                                                |
| 1,00 | CDK20       | cyclin-dependent kinase 20                                                                |
| 1,00 | UTP14A      | UTP14A small subunit (SSU) processome component                                           |
| 1,00 | PSMD14      | proteasome 26S subunit, non-ATPase 14                                                     |
| 1,00 | SIAH1       | siah E3 ubiquitin protein ligase 1                                                        |
| 1,00 | PHF19       | PHD finger protein 19                                                                     |

|      |                    |                                                                            |
|------|--------------------|----------------------------------------------------------------------------|
| 1,00 | MRPL40             | mitochondrial ribosomal protein L40                                        |
| 1,00 | CCDC168            | coiled-coil domain containing 168                                          |
| 1,00 | YARS               | tyrosyl-tRNA synthetase                                                    |
| 1,00 | ZNF425             | zinc finger protein 425                                                    |
| 1,00 | SRCIN1             | SRC kinase signaling inhibitor 1                                           |
| 1,00 | C11orf97           | chromosome 11 open reading frame 97                                        |
| 1,00 | PTDSS1             | phosphatidylserine synthase 1                                              |
| 1,00 | TEX26              | testis expressed 26                                                        |
| 1,00 | TM2D3              | TM2 domain containing 3                                                    |
| 1,00 | PXK                | PX domain containing serine/threonine kinase                               |
| 1,00 | RASAL3             | RAS protein activator like 3                                               |
| 1,00 | C21orf33           | chromosome 21 open reading frame 33                                        |
| 1,00 | IL27RA             | interleukin 27 receptor, alpha                                             |
| 1,00 | IRF2BP1            | interferon regulatory factor 2 binding protein 1                           |
| 1,00 | MIEF1              | mitochondrial elongation factor 1                                          |
| 1,00 | TNNT3              | troponin T type 3 (skeletal, fast)                                         |
| 1,00 | TYSND1             | trypsin domain containing 1                                                |
| 1,00 | ATAD3C             | ATPase family, AAA domain containing 3C                                    |
| 1,00 | SNED1              | sushi, nidogen and EGF-like domains 1                                      |
| 1,00 | PSMD6              | proteasome 26S subunit, non-ATPase 6                                       |
| 1,00 | ZZZ3               | zinc finger, ZZ-type containing 3                                          |
| 1,00 | ITLN1              | intelectin 1 (galactofuranose binding)                                     |
| 1,00 | QARS; MIR6890      | glutaminyl-tRNA synthetase; microRNA 6890                                  |
| 1,00 | EGFLAM             | EGF-like, fibronectin type III and laminin G domains                       |
| 1,00 | NAP1L3             | nucleosome assembly protein 1-like 3                                       |
| 1,00 | AGPAT1;<br>MIR6721 | 1-acylglycerol-3-phosphate O-acyltransferase 1;<br>microRNA 6721           |
| 1,00 | CNTN6              | contactin 6                                                                |
| 1,00 | PROC               | protein C (inactivator of coagulation factors Va and VIIIa)                |
| 1,00 | POTEM; POTE        | POTE ankyrin domain family, member M; POTE ankyrin domain family, member G |
| 1,00 | CAPRIN1            | cell cycle associated protein 1                                            |
| 1,00 | THSD4              | Transcript Identified by AceView, Entrez Gene ID(s) 79875                  |
| 1,00 | ZACN               | zinc activated ligand-gated ion channel                                    |
| 1,00 | OR4P4              | olfactory receptor, family 4, subfamily P, member 4                        |
| 1,00 | COMMD5             | COMM domain containing 5                                                   |
| 1,00 | PSMD11             | proteasome 26S subunit, non-ATPase 11                                      |
| 1,00 | DPEP2              | dipeptidase 2                                                              |
| 1,00 | CCDC180            | coiled-coil domain containing 180                                          |
| 1,00 | PTPN3              | protein tyrosine phosphatase, non-receptor type 3                          |
| 1,00 | SLC30A6            | solute carrier family 30 (zinc transporter), member 6                      |
| 1,00 | NBPF3              | neuroblastoma breakpoint family, member 3                                  |
| 1,00 | SLMAP              | sarcolemma associated protein                                              |
| 1,00 | PROS1              | protein S (alpha)                                                          |
| 1,00 | MIA2               | melanoma inhibitory activity 2                                             |
| 1,00 | RPTOR              | regulatory associated protein of MTOR, complex 1                           |
| 1,00 | STRA8              | stimulated by retinoic acid 8                                              |
| 1,00 | ZBTB2              | zinc finger and BTB domain containing 2                                    |

|      |                                                                     |                                                                                                                                                                                                                                                                                                                                                                                                                                                                                                                                                                          |
|------|---------------------------------------------------------------------|--------------------------------------------------------------------------------------------------------------------------------------------------------------------------------------------------------------------------------------------------------------------------------------------------------------------------------------------------------------------------------------------------------------------------------------------------------------------------------------------------------------------------------------------------------------------------|
| 1,00 | CD3G                                                                | CD3g molecule, gamma (CD3-TCR complex)                                                                                                                                                                                                                                                                                                                                                                                                                                                                                                                                   |
| 1,00 | ADAMTS19                                                            | ADAM metallopeptidase with thrombospondin type 1 motif 19                                                                                                                                                                                                                                                                                                                                                                                                                                                                                                                |
| 1,00 | NPAS4                                                               | neuronal PAS domain protein 4                                                                                                                                                                                                                                                                                                                                                                                                                                                                                                                                            |
| 1,00 | ZNHIT2                                                              | zinc finger, HIT-type containing 2                                                                                                                                                                                                                                                                                                                                                                                                                                                                                                                                       |
| 1,00 | PACSIN1                                                             | protein kinase C and casein kinase substrate in neurons 1                                                                                                                                                                                                                                                                                                                                                                                                                                                                                                                |
| 1,00 | HSPE1-MOB4                                                          | HSPE1-MOB4 readthrough                                                                                                                                                                                                                                                                                                                                                                                                                                                                                                                                                   |
| 1,00 | BTF3                                                                | basic transcription factor 3                                                                                                                                                                                                                                                                                                                                                                                                                                                                                                                                             |
| 1,00 | KLK14                                                               | kallikrein related peptidase 14                                                                                                                                                                                                                                                                                                                                                                                                                                                                                                                                          |
| 1,00 | TTC14                                                               | tetratricopeptide repeat domain 14                                                                                                                                                                                                                                                                                                                                                                                                                                                                                                                                       |
| 1,00 | NPIPA3                                                              | nuclear pore complex interacting protein family, member A3                                                                                                                                                                                                                                                                                                                                                                                                                                                                                                               |
| 1,00 | RND3                                                                | Rho family GTPase 3                                                                                                                                                                                                                                                                                                                                                                                                                                                                                                                                                      |
| 1,00 | LGALS3                                                              | lectin, galactoside-binding, soluble, 3                                                                                                                                                                                                                                                                                                                                                                                                                                                                                                                                  |
| 1,00 | UBQLN2                                                              | ubiquilin 2                                                                                                                                                                                                                                                                                                                                                                                                                                                                                                                                                              |
| 1,00 | TMEM123                                                             | transmembrane protein 123                                                                                                                                                                                                                                                                                                                                                                                                                                                                                                                                                |
| 1,00 | NPIPA2                                                              | nuclear pore complex interacting protein family, member A2                                                                                                                                                                                                                                                                                                                                                                                                                                                                                                               |
| 1,00 | TRIP10                                                              | thyroid hormone receptor interactor 10                                                                                                                                                                                                                                                                                                                                                                                                                                                                                                                                   |
| 1,00 | VHL                                                                 | von Hippel-Lindau tumor suppressor, E3 ubiquitin protein ligase                                                                                                                                                                                                                                                                                                                                                                                                                                                                                                          |
| 1,00 | ANKZF1                                                              | ankyrin repeat and zinc finger domain containing 1                                                                                                                                                                                                                                                                                                                                                                                                                                                                                                                       |
| 1,00 | DCTN6                                                               | dynactin 6                                                                                                                                                                                                                                                                                                                                                                                                                                                                                                                                                               |
| 1,00 | TAF10                                                               | TAF10 RNA polymerase II, TATA box binding protein (TBP)-associated factor, 30kDa                                                                                                                                                                                                                                                                                                                                                                                                                                                                                         |
| 1,00 | KIAA1211                                                            | KIAA1211                                                                                                                                                                                                                                                                                                                                                                                                                                                                                                                                                                 |
| 1,00 | NOC2L                                                               | NOC2-like nucleolar associated transcriptional repressor                                                                                                                                                                                                                                                                                                                                                                                                                                                                                                                 |
| 1,00 | COL4A3BP                                                            | collagen, type IV, alpha 3 (Goodpasture antigen) binding protein                                                                                                                                                                                                                                                                                                                                                                                                                                                                                                         |
| 1,00 | HSDL2                                                               | hydroxysteroid dehydrogenase like 2                                                                                                                                                                                                                                                                                                                                                                                                                                                                                                                                      |
| 1,00 | TAS2R19                                                             | taste receptor, type 2, member 19                                                                                                                                                                                                                                                                                                                                                                                                                                                                                                                                        |
| 1,00 | RALGDS                                                              | ral guanine nucleotide dissociation stimulator                                                                                                                                                                                                                                                                                                                                                                                                                                                                                                                           |
| 1,00 | ANXA5                                                               | annexin A5                                                                                                                                                                                                                                                                                                                                                                                                                                                                                                                                                               |
| 1,00 | REXO2                                                               | RNA exonuclease 2                                                                                                                                                                                                                                                                                                                                                                                                                                                                                                                                                        |
| 1,00 | CCT4                                                                | chaperonin containing TCP1, subunit 4 (delta)                                                                                                                                                                                                                                                                                                                                                                                                                                                                                                                            |
| 1,00 | CFAP97                                                              | cilia and flagella associated protein 97                                                                                                                                                                                                                                                                                                                                                                                                                                                                                                                                 |
| 1,00 | SGK494;<br>FLJ25006;<br>KIAA0100andSGK494andSPAG5;<br>RP11-192H23.4 | uncharacterized serine/threonine-protein kinase SgK494; Synthetic construct Homo sapiens clone IMAGE:100064171, MGC:193254 uncharacterized serine/threonine-protein kinase SgK494 (FLJ25006) mRNA, encodes complete protein.; Salzman2013 ANNOTATED, CDS, coding, INTERNAL, OVCODE, OVERLAPTX, OVEXON best transcript NM_001174103; Transcript Identified by AceView, Entrez Gene ID(s) 124923; 9703; 645851; 10615; uncharacterized serine/threonine-protein kinase SgK494 [Source:EntrezGene;Acc:124923]; Uncharacterized protein [Source:UniProtKB/TrEMBL;Acc:J3KTE0] |

|      |                            |                                                                                                         |
|------|----------------------------|---------------------------------------------------------------------------------------------------------|
| 1,00 | TMIGD2                     | transmembrane and immunoglobulin domain containing 2                                                    |
| 1,00 | ZCRB1; MIR7851             | zinc finger CCHC-type and RNA binding motif 1; microRNA 7851                                            |
| 1,00 | COL18A1-AS1                | COL18A1 antisense RNA 1                                                                                 |
| 1,00 | CAMK2B                     | Transcript Identified by AceView, Entrez Gene ID(s) 816                                                 |
| 1,00 | OR10A6                     | olfactory receptor family 10 subfamily A member 6 (gene/pseudogene) [Source:HGNC Symbol;Acc:HGNC:15132] |
| 1,00 | PPP1R15B                   | protein phosphatase 1, regulatory subunit 15B                                                           |
| 1,00 | TEX11                      | testis expressed 11                                                                                     |
| 1,00 | FBL                        | fibrillarin                                                                                             |
| 1,00 | LAT2                       | linker for activation of T-cells family member 2                                                        |
| 1,00 | B3GNT7                     | UDP-GlcNAc:betaGal beta-1,3-N-acetylglucosaminyltransferase 7                                           |
| 1,00 | SNX3                       | sorting nexin 3                                                                                         |
| 1,00 | EPB42                      | erythrocyte membrane protein band 4.2                                                                   |
| 1,00 | TRIP13                     | thyroid hormone receptor interactor 13                                                                  |
| 1,00 | ZXDC                       | ZXD family zinc finger C                                                                                |
| 1,00 | EIF2B1                     | eukaryotic translation initiation factor 2B, subunit 1 alpha, 26kDa                                     |
| 1,00 | LOC100131496; RP4-569M23.5 | uncharacterized LOC100131496; novel transcript, antisense to ZMYND8                                     |
| 1,00 | RAN                        | RAN, member RAS oncogene family                                                                         |
| 1,00 | GOLGA8EP; GOLGA8DP         | golgin A8 family, member E, pseudogene; golgin A8 family, member D, pseudogene                          |
| 1,00 | KLHL32                     | kelch-like family member 32                                                                             |
| 1,00 | ENTPD6                     | ectonucleoside triphosphate diphosphohydrolase 6 (putative)                                             |
| 1,00 | SRC                        | SRC proto-oncogene, non-receptor tyrosine kinase                                                        |
| 1,00 | SRSF4                      | serine/arginine-rich splicing factor 4                                                                  |
| 1,00 | NR2E1                      | nuclear receptor subfamily 2, group E, member 1                                                         |
| 1,00 | KCNJ13                     | potassium channel, inwardly rectifying subfamily J, member 13                                           |
| 1,00 | LY6G6E                     | lymphocyte antigen 6 complex, locus G6E (pseudogene)                                                    |
| 1,00 | TOLLIP                     | toll interacting protein                                                                                |
| 1,00 | ZNF124                     | zinc finger protein 124                                                                                 |
| 1,00 | IFITM3                     | interferon induced transmembrane protein 3                                                              |
| 1,00 | CIR1                       | corepressor interacting with RBPJ, 1                                                                    |
| 1,00 | C1orf210                   | chromosome 1 open reading frame 210                                                                     |
| 1,00 | EXOSC7                     | exosome component 7                                                                                     |
| 1,00 | ZFAND3                     | zinc finger, AN1-type domain 3                                                                          |
| 1,00 | DDX27                      | DEAD (Asp-Glu-Ala-Asp) box polypeptide 27                                                               |
| 1,00 | TFRC                       | transferrin receptor                                                                                    |
| 1,00 | CD164                      | CD164 molecule, sialomucin                                                                              |
| 1,00 | SLC22A7                    | solute carrier family 22 (organic anion transporter), member 7                                          |
| 1,00 | NME9                       | NME/NM23 family member 9                                                                                |

|      |                                 |                                                                                 |
|------|---------------------------------|---------------------------------------------------------------------------------|
| 1,00 | PIK3C2G                         | phosphatidylinositol-4-phosphate 3-kinase, catalytic subunit type 2 gamma       |
| 1,00 | HK3                             | hexokinase 3 (white cell)                                                       |
| 1,00 | LCE1B                           | late cornified envelope 1B                                                      |
| 1,00 | SLC30A7                         | solute carrier family 30 (zinc transporter), member 7                           |
| 1,00 | NDE1; MIR484                    | nudE neurodevelopment protein 1; microRNA 484                                   |
| 1,00 | MBD2                            | methyl-CpG binding domain protein 2                                             |
| 1,00 | PLOD1                           | procollagen-lysine, 2-oxoglutarate 5-dioxygenase 1                              |
| 1,00 | INS; INS-IGF2                   | insulin; INS-IGF2 readthrough                                                   |
| 1,00 | TRAK2                           | trafficking protein, kinesin binding 2                                          |
| 1,00 | NUDT7                           | nudix hydrolase 7                                                               |
| 1,00 | NLRX1                           | NLR family member X1                                                            |
| 1,00 | IFRD2                           | interferon-related developmental regulator 2                                    |
| 1,00 | BRIP1                           | BRCA1 interacting protein C-terminal helicase 1                                 |
| 1,00 | PEX11B                          | peroxisomal biogenesis factor 11 beta                                           |
| 1,00 | OR51Q1                          | olfactory receptor, family 51, subfamily Q, member 1 (gene/pseudogene)          |
| 1,00 | NKX2-4                          | NK2 homeobox 4                                                                  |
| 1,00 | RABEPK                          | Rab9 effector protein with kelch motifs                                         |
| 1,00 | ADGRG1                          | adhesion G protein-coupled receptor G1                                          |
| 1,00 | MOSPD3                          | motile sperm domain containing 3                                                |
| 1,00 | DNAJA3                          | DnaJ (Hsp40) homolog, subfamily A, member 3                                     |
| 1,00 | STRADB                          | STE20-related kinase adaptor beta                                               |
| 1,00 | FHL5                            | four and a half LIM domains 5                                                   |
| 1,00 | MAPK6                           | mitogen-activated protein kinase 6                                              |
| 1,00 | TGFBRAP1                        | transforming growth factor beta receptor associated protein 1                   |
| 1,00 | NKIRAS1                         | NFKB inhibitor interacting Ras-like 1                                           |
| 1,00 | PAPSS1                          | 3-phosphoadenosine 5-phosphosulfate synthase 1                                  |
| 1,00 | SLC27A5                         | solute carrier family 27 (fatty acid transporter), member 5                     |
| 1,00 | CHERP                           | calcium homeostasis endoplasmic reticulum protein                               |
| 1,00 | CSF1                            | colony stimulating factor 1 (macrophage)                                        |
| 1,00 | PIRT                            | phosphoinositide-interacting regulator of transient receptor potential channels |
| 1,00 | MITD1                           | microtubule interacting and trafficking domain containing 1                     |
| 1,00 | ANKMY2                          | ankyrin repeat and MYND domain containing 2                                     |
| 1,00 | MIDN                            | midnolin                                                                        |
| 1,00 | CDK10                           | cyclin-dependent kinase 10                                                      |
| 1,00 | GSS                             | glutathione synthetase                                                          |
| 1,00 | DTX3                            | deltex 3, E3 ubiquitin ligase                                                   |
| 1,00 | TYRP1                           | tyrosinase-related protein 1                                                    |
| 1,00 | MEGF9                           | multiple EGF-like-domains 9                                                     |
| 1,00 | MYH3                            | myosin, heavy chain 3, skeletal muscle, embryonic                               |
| 1,00 | GAGE12C;<br>GAGE12E;<br>GAGE12H | G antigen 12C; G antigen 12E; G antigen 12H                                     |
| 1,00 | FBXO5                           | F-box protein 5                                                                 |
| 1,00 | BZW1                            | basic leucine zipper and W2 domains 1                                           |

|      |                 |                                                                                        |
|------|-----------------|----------------------------------------------------------------------------------------|
| 1,00 | NWD1            | NACHT and WD repeat domain containing 1                                                |
| 1,00 | NDUFA9          | NADH dehydrogenase (ubiquinone) 1 alpha subcomplex, 9, 39kDa                           |
| 1,00 | PODNL1          | podocan-like 1                                                                         |
| 1,00 | ZNF233          | zinc finger protein 233                                                                |
| 1,00 | LENG8           | leukocyte receptor cluster (LRC) member 8                                              |
| 1,00 | OBP2B           | odorant binding protein 2B                                                             |
| 1,00 | OR7A17          | olfactory receptor, family 7, subfamily A, member 17                                   |
| 1,00 | HEPH            | hephaestin                                                                             |
| 1,00 | COX6C           | cytochrome c oxidase subunit VIc                                                       |
| 1,00 | LEMD3           | LEM domain containing 3                                                                |
| 1,00 | HPSE            | heparanase                                                                             |
| 1,00 | ZKSCAN7         | zinc finger with KRAB and SCAN domains 7                                               |
| 1,00 | SLC39A8         | solute carrier family 39 (zinc transporter), member 8                                  |
| 1,00 | TIPRL           | TOR signaling pathway regulator                                                        |
| 1,00 | SUPT20HL1       | SPT20 homolog, SAGA complex component-like 1                                           |
| 1,00 | OGDH            | oxoglutarate (alpha-ketoglutarate) dehydrogenase (lipoamide)                           |
| 1,00 | CDC42EP2        | CDC42 effector protein (Rho GTPase binding) 2                                          |
| 1,00 | C1orf220        | chromosome 1 open reading frame 220                                                    |
| 1,00 | ERG             | v-ets avian erythroblastosis virus E26 oncogene homolog                                |
| 1,00 | FAM43A          | family with sequence similarity 43, member A                                           |
| 1,00 | CARS            | cysteinyl-tRNA synthetase                                                              |
| 1,00 | SPECC1L-ADORA2A | SPECC1L-ADORA2A readthrough (NMD candidate)                                            |
| 1,00 | HAGHL           | hydroxyacylglutathione hydrolase-like                                                  |
| 1,00 | JKAMP           | JNK1/MAPK8-associated membrane protein                                                 |
| 1,00 | NOL8            | nucleolar protein 8                                                                    |
| 1,00 | ECI2            | enoyl-CoA delta isomerase 2                                                            |
| 1,00 | SETD6           | SET domain containing 6                                                                |
| 1,00 | ZNF627          | zinc finger protein 627                                                                |
| 1,00 | PADI2           | peptidyl arginine deiminase, type II                                                   |
| 1,00 | DPP9            | dipeptidyl-peptidase 9                                                                 |
| 1,00 | MRPL18          | mitochondrial ribosomal protein L18                                                    |
| 1,00 | HMBS            | hydroxymethylbilane synthase                                                           |
| 1,00 | MGAT4B          | mannosyl (alpha-1,3-)-glycoprotein beta-1,4-N-acetylglucosaminyltransferase, isozyme B |
| 1,00 | WNK4            | WNK lysine deficient protein kinase 4                                                  |
| 1,00 | VCPIP1          | valosin containing protein (p97)/p47 complex interacting protein 1                     |
| 1,00 | NUDT8           | nudix hydrolase 8                                                                      |
| 1,00 | STARD5          | StAR-related lipid transfer domain containing 5                                        |
| 1,00 | JUND            | jun D proto-oncogene                                                                   |
| 1,00 | SCEL            | sciellin                                                                               |
| 1,00 | FAM163A         | family with sequence similarity 163, member A                                          |
| 1,00 | KLK10           | kallikrein related peptidase 10                                                        |
| 1,00 | KHDC1           | KH homology domain containing 1                                                        |
| 1,00 | BRCC3           | BRCA1/BRCA2-containing complex subunit 3                                               |
| 1,00 | POLR3B          | polymerase (RNA) III (DNA directed) polypeptide B                                      |

|      |                     |                                                                                        |
|------|---------------------|----------------------------------------------------------------------------------------|
| 1,00 | CCDC71L             | coiled-coil domain containing 71-like                                                  |
| 1,00 | HNRNPA1             | heterogeneous nuclear ribonucleoprotein A1                                             |
| 1,00 | OARD1               | O-acyl-ADP-ribose deacylase 1                                                          |
| 1,00 | PBK                 | PDZ binding kinase                                                                     |
| 1,00 | ANKRD9              | ankyrin repeat domain 9                                                                |
| 1,00 | CDC40               | cell division cycle 40                                                                 |
| 1,00 | LSM2                | LSM2 homolog, U6 small nuclear RNA and mRNA degradation associated                     |
| 1,00 | TRAM1               | translocation associated membrane protein 1                                            |
| 1,00 | A2BP1               | Transcript Identified by AceView, Entrez Gene ID(s) 54715                              |
| 1,00 | APOM                | apolipoprotein M                                                                       |
| 1,00 | ZNF264              | zinc finger protein 264                                                                |
| 1,00 | SNU13               | SNU13 homolog, small nuclear ribonucleoprotein (U4/U6.U5)                              |
| 1,00 | OR52K1              | olfactory receptor, family 52, subfamily K, member 1                                   |
| 1,00 | SEMA3A              | sema domain, immunoglobulin domain (Ig), short basic domain, secreted, (semaphorin) 3A |
| 1,00 | PRKCZ               | protein kinase C, zeta                                                                 |
| 1,00 | TRAF5               | TNF receptor-associated factor 5                                                       |
| 1,00 | LMAN1               | lectin, mannose-binding, 1                                                             |
| 1,00 | CPA3                | carboxypeptidase A3 (mast cell)                                                        |
| 1,00 | BCAP29              | B-cell receptor-associated protein 29                                                  |
| 1,00 | ASCC3               | activating signal cointegrator 1 complex subunit 3                                     |
| 1,00 | NAA60               | N(alpha)-acetyltransferase 60, NatF catalytic subunit                                  |
| 1,00 | FGF13;<br>LINC00889 | fibroblast growth factor 13; long intergenic non-protein coding RNA 889                |
| 1,00 | NIPAL2              | NIPA-like domain containing 2                                                          |
| 1,00 | HMOX2               | heme oxygenase 2                                                                       |
| 1,00 | YWHAG               | tyrosine 3-monooxygenase/tryptophan 5-monooxygenase activation protein, gamma          |
| 1,00 | OAZ1                | ornithine decarboxylase antizyme 1                                                     |
| 1,00 | ZNF527              | zinc finger protein 527                                                                |
| 1,00 | ABCG2               | ATP binding cassette subfamily G member 2 (Junior blood group)                         |
| 1,00 | PTPRCAP             | protein tyrosine phosphatase, receptor type, C-associated protein                      |
| 1,00 | UBR3                | ubiquitin protein ligase E3 component n-recognin 3 (putative)                          |
| 1,00 | EZR                 | ezrin                                                                                  |
| 1,00 | PHACTR3             | Transcript Identified by AceView, Entrez Gene ID(s) 116154                             |
| 1,00 | GATB                | glutamyl-tRNA(Gln) amidotransferase, subunit B                                         |
| 1,00 | GC                  | group-specific component (vitamin D binding protein)                                   |
| 1,00 | PRR20D;<br>PRR20B   | proline rich 20D; proline rich 20B                                                     |
| 1,00 | PRR20D;<br>PRR20B   | proline rich 20D; proline rich 20B                                                     |
| 1,00 | PRR20C;<br>PRR20E   | proline rich 20C; proline rich 20E                                                     |

|      |                                         |                                                                           |
|------|-----------------------------------------|---------------------------------------------------------------------------|
| 1,00 | PRR20B;<br>PRR20E;<br>PRR20A;<br>PRR20D | proline rich 20B; proline rich 20E; proline rich 20A;<br>proline rich 20D |
| 1,00 | PRR20C;<br>PRR20D                       | proline rich 20C; proline rich 20D                                        |
| 1,00 | OSTC                                    | oligosaccharyltransferase complex subunit (non-catalytic)                 |
| 1,00 | PLSCR4                                  | phospholipid scramblase 4                                                 |
| 1,00 | SLIT1;<br>ARHGAP19-<br>SLIT1            | slit guidance ligand 1; ARHGAP19-SLIT1 readthrough (NMD candidate)        |
| 1,00 | SNRPB2                                  | small nuclear ribonucleoprotein polypeptide B                             |
| 1,00 | TATDN1;<br>MIR6844                      | TatD DNase domain containing 1; microRNA 6844                             |
| 1,00 | ACSL3                                   | acyl-CoA synthetase long-chain family member 3                            |
| 1,00 | FEN1                                    | flap structure-specific endonuclease 1                                    |
| 1,00 | RPS6KA3                                 | ribosomal protein S6 kinase, 90kDa, polypeptide 3                         |
| 1,00 | BCL6                                    | B-cell CLL/lymphoma 6                                                     |
| 1,00 | GINS4                                   | GINS complex subunit 4 (Sld5 homolog)                                     |
| 1,00 | BLOC1S2                                 | biogenesis of lysosomal organelles complex-1, subunit 2                   |
| 1,00 | IFI44L                                  | interferon-induced protein 44-like                                        |
| 1,00 | ABI1                                    | abl-interactor 1                                                          |
| 1,00 | MRPL42                                  | mitochondrial ribosomal protein L42                                       |
| 1,00 | R3HDM1                                  | R3H domain containing 1                                                   |
| 1,00 | POTED                                   | POTE ankyrin domain family, member D                                      |
| 1,00 | ERICH3                                  | glutamate rich 3                                                          |
| 1,00 | PPAP2B                                  | Transcript Identified by AceView, Entrez Gene ID(s) 8613                  |
| 1,00 | RNF14                                   | ring finger protein 14                                                    |
| 1,00 | KMO                                     | kynurenine 3-monooxygenase (kynurenine 3-hydroxylase)                     |
| 1,00 | PRPH                                    | peripherin                                                                |
| 1,00 | C5orf45                                 | chromosome 5 open reading frame 45                                        |
| 1,00 | HEXB                                    | hexosaminidase B (beta polypeptide)                                       |
| 1,00 | LIPE                                    | lipase, hormone-sensitive                                                 |
| 1,00 | ACSM1                                   | acyl-CoA synthetase medium-chain family member 1                          |
| 1,00 | TCEAL3                                  | transcription elongation factor A (SII)-like 3                            |
| 1,00 | APBA1                                   | amyloid beta (A4) precursor protein-binding, family A, member 1           |
| 1,00 | MS4A4A                                  | membrane-spanning 4-domains, subfamily A, member 4A                       |
| 1,00 | NDUFAB1                                 | NADH dehydrogenase (ubiquinone) 1, alpha/beta subcomplex, 1, 8kDa         |
| 1,00 | ZNF180                                  | zinc finger protein 180                                                   |
| 1,00 | PSAT1                                   | phosphoserine aminotransferase 1                                          |
| 1,00 | OR6C4                                   | olfactory receptor, family 6, subfamily C, member 4                       |
| 1,00 | SSR3                                    | signal sequence receptor, gamma (translocon-associated protein gamma)     |
| 1,00 | USP19                                   | ubiquitin specific peptidase 19                                           |

|      |                  |                                                                                   |
|------|------------------|-----------------------------------------------------------------------------------|
| 1,00 | CCK              | cholecystokinin                                                                   |
| 1,00 | BOLA2;<br>BOLA2B | bolA family member 2; bolA family member 2B                                       |
| 1,00 | OR1I1            | olfactory receptor, family 1, subfamily I, member 1                               |
| 1,00 | PSMB7            | proteasome subunit beta 7                                                         |
| 1,00 | AURKA            | aurora kinase A                                                                   |
| 1,00 | PPP1CC           | protein phosphatase 1, catalytic subunit, gamma isozyme                           |
| 1,00 | NXF3             | nuclear RNA export factor 3                                                       |
| 1,00 | REXO4            | REX4 homolog, 3'-5' exonuclease [Source:HGNC Symbol;Acc:HGNC:12820]               |
| 1,00 | ADRB2            | adrenoceptor beta 2, surface                                                      |
| 1,00 | STX1B            | syntaxin 1B                                                                       |
| 1,00 | PRAMEF10         | PRAME family member 10                                                            |
| 1,00 | C19orf66         | chromosome 19 open reading frame 66                                               |
| 1,00 | JUNB             | jun B proto-oncogene                                                              |
| 1,00 | SMUG1            | single-strand-selective monofunctional uracil-DNA glycosylase 1                   |
| 1,00 | ZNF780B          | zinc finger protein 780B                                                          |
| 1,00 | ZNF780B          | zinc finger protein 780B                                                          |
| 1,00 | IGF1R            | insulin-like growth factor 1 receptor                                             |
| 1,00 | ACTR2            | ARP2 actin-related protein 2 homolog (yeast)                                      |
| 1,00 | DDX18            | DEAD (Asp-Glu-Ala-Asp) box polypeptide 18                                         |
| 1,00 | ZDHHC5           | zinc finger, DHHC-type containing 5                                               |
| 1,00 | FAM173A          | family with sequence similarity 173, member A                                     |
| 1,00 | TWIST2           | twist family bHLH transcription factor 2                                          |
| 1,00 | GSX2             | GS homeobox 2                                                                     |
| 1,00 | DDX24            | DEAD (Asp-Glu-Ala-Asp) box helicase 24                                            |
| 1,00 | IL1RAPL2         | interleukin 1 receptor accessory protein-like 2                                   |
| 1,00 | MCU              | mitochondrial calcium uniporter                                                   |
| 1,00 | DBN1             | drebrin 1                                                                         |
| 1,00 | TRAF3            | TNF receptor-associated factor 3                                                  |
| 1,00 | EXOSC5           | exosome component 5                                                               |
| 1,00 | ETNK1            | ethanolamine kinase 1                                                             |
| 1,00 | PLA2G4D          | phospholipase A2, group IVD (cytosolic)                                           |
| 1,00 | RPN1             | ribophorin I                                                                      |
| 1,00 | ACBD5            | acyl-CoA binding domain containing 5                                              |
| 1,00 | TRAPPC4          | trafficking protein particle complex 4                                            |
| 1,00 | RPN2             | ribophorin II                                                                     |
| 1,00 | TTLL6            | tubulin tyrosine ligase-like family member 6                                      |
| 1,00 | ATP8B2           | ATPase, aminophospholipid transporter, class I, type 8B, member 2                 |
| 1,00 | MRPS10           | mitochondrial ribosomal protein S10                                               |
| 1,00 | LYZL1            | lysozyme-like 1                                                                   |
| 1,00 | NDUFS4           | NADH dehydrogenase (ubiquinone) Fe-S protein 4, 18kDa (NADH-coenzyme Q reductase) |
| 1,00 | GCNT2            | glucosaminyl (N-acetyl) transferase 2, I-branching enzyme (I blood group)         |
| 1,00 | PITPNB           | phosphatidylinositol transfer protein, beta                                       |
| 1,00 | TMEM168          | transmembrane protein 168                                                         |

|      |                               |                                                                                                                                                                                                |
|------|-------------------------------|------------------------------------------------------------------------------------------------------------------------------------------------------------------------------------------------|
| 1,00 | ARHGEF38                      | Rho guanine nucleotide exchange factor 38                                                                                                                                                      |
| 1,00 | EHMT2                         | euchromatic histone-lysine N-methyltransferase 2                                                                                                                                               |
| 1,00 | SORBS2                        | sorbin and SH3 domain containing 2                                                                                                                                                             |
| 1,00 | TMEM179                       | transmembrane protein 179                                                                                                                                                                      |
| 1,00 | ANKLE1                        | ankyrin repeat and LEM domain containing 1                                                                                                                                                     |
| 1,00 | ALDH18A1                      | aldehyde dehydrogenase 18 family, member A1                                                                                                                                                    |
| 1,00 | CNTNAP3B                      | contactin associated protein-like 3B                                                                                                                                                           |
| 1,00 | NOL3                          | nucleolar protein 3 (apoptosis repressor with CARD domain)                                                                                                                                     |
| 1,00 | DEPTOR                        | DEP domain containing MTOR-interacting protein                                                                                                                                                 |
| 1,00 | NDUFA10                       | NADH dehydrogenase (ubiquinone) 1 alpha subcomplex, 10, 42kDa                                                                                                                                  |
| 1,00 | NPLOC4                        | NPL4 homolog, ubiquitin recognition factor                                                                                                                                                     |
| 1,00 | SLC22A13                      | solute carrier family 22 (organic anion/urate transporter), member 13                                                                                                                          |
| 1,00 | EIF5B                         | eukaryotic translation initiation factor 5B                                                                                                                                                    |
| 1,00 | sep-10                        | sepin 10                                                                                                                                                                                       |
| 1,00 | DDX20                         | DEAD (Asp-Glu-Ala-Asp) box polypeptide 20                                                                                                                                                      |
| 1,00 | ZBTB40                        | zinc finger and BTB domain containing 40                                                                                                                                                       |
| 1,00 | HOXC9                         | homeobox C9                                                                                                                                                                                    |
| 1,00 | CMYA5                         | cardiomyopathy associated 5                                                                                                                                                                    |
| 1,00 | CD96                          | CD96 molecule                                                                                                                                                                                  |
| 1,00 | ZNF354B                       | Zhang2013 ALT_ACCEPTOR, ALT_DONOR, coding, INTERNAL, intronic best transcript NM_058230                                                                                                        |
| 1,00 | JMJD1C                        | jumonji domain containing 1C                                                                                                                                                                   |
| 1,00 | TICRR                         | TOPBP1-interacting checkpoint and replication regulator                                                                                                                                        |
| 1,00 | ISPD                          | isoprenoid synthase domain containing                                                                                                                                                          |
| 1,00 | ZDHHC3                        | zinc finger, DHHC-type containing 3                                                                                                                                                            |
| 1,00 | ACADSB                        | acyl-CoA dehydrogenase, short/branched chain                                                                                                                                                   |
| 1,00 | KRAS                          | Kirsten rat sarcoma viral oncogene homolog                                                                                                                                                     |
| 1,00 | PUS1                          | pseudouridylate synthase 1                                                                                                                                                                     |
| 1,00 | DIP2B                         | disco-interacting protein 2 homolog B                                                                                                                                                          |
| 1,00 | ZNF485                        | zinc finger protein 485                                                                                                                                                                        |
| 1,00 | SP1                           | Sp1 transcription factor                                                                                                                                                                       |
| 1,00 | VTI1B                         | vesicle transport through interaction with t-SNAREs 1B                                                                                                                                         |
| 1,00 | KRTAP12-4                     | keratin associated protein 12-4                                                                                                                                                                |
| 1,00 | MED14                         | mediator complex subunit 14                                                                                                                                                                    |
| 1,00 | MGC57346-CRHR1; RP11-105N13.4 | Homo sapiens MGC57346-CRHR1 readthrough (MGC57346-CRHR1), transcript variant 5, mRNA.; Homo sapiens MGC57346-CRHR1 readthrough (MGC57346-CRHR1), transcript variant 6, mRNA.; novel transcript |
| 1,00 | OR5G5P; OR5G3                 | olfactory receptor, family 5, subfamily G, member 5 pseudogene; olfactory receptor, family 5, subfamily G, member 3 (gene/pseudogene)                                                          |
| 1,00 | HLTF                          | helicase-like transcription factor                                                                                                                                                             |
| 1,00 | CEP170B                       | centrosomal protein 170B                                                                                                                                                                       |

|      |                            |                                                                                                                                                        |
|------|----------------------------|--------------------------------------------------------------------------------------------------------------------------------------------------------|
| 1,00 | C17orf112                  | chromosome 17 open reading frame 112                                                                                                                   |
| 1,00 | SRBD1                      | S1 RNA binding domain 1                                                                                                                                |
| 1,00 | SMPD2                      | sphingomyelin phosphodiesterase 2, neutral membrane (neutral sphingomyelinase)                                                                         |
| 1,00 | ATXN7L1                    | ataxin 7-like 1                                                                                                                                        |
| 1,00 | HAUS8                      | HAUS augmin like complex subunit 8                                                                                                                     |
| 1,00 | GTF2B                      | general transcription factor IIB                                                                                                                       |
| 1,00 | TMEM183A                   | transmembrane protein 183A                                                                                                                             |
| 1,00 | MXI1                       | MAX interactor 1, dimerization protein                                                                                                                 |
| 1,00 | IGF2BP1                    | insulin-like growth factor 2 mRNA binding protein 1                                                                                                    |
| 1,00 | TRIM32                     | tripartite motif containing 32                                                                                                                         |
| 1,00 | PGA5                       | pepsinogen 5, group I (pepsinogen A)                                                                                                                   |
| 1,00 | TRMT13                     | tRNA methyltransferase 13 homolog (S. cerevisiae)                                                                                                      |
| 1,00 | NWD2                       | NACHT and WD repeat domain containing 2                                                                                                                |
| 1,00 | P2RX5-TAX1BP3              | P2RX5-TAX1BP3 readthrough (NMD candidate)                                                                                                              |
| 1,00 | SNRNP70                    | small nuclear ribonucleoprotein, U1 70kDa subunit                                                                                                      |
| 1,00 | CD300LB                    | CD300 molecule-like family member b                                                                                                                    |
| 1,00 | CDX2                       | caudal type homeobox 2                                                                                                                                 |
| 1,00 | AQP11                      | aquaporin 11                                                                                                                                           |
| 1,00 | SCRN2                      | secernin 2                                                                                                                                             |
| 1,00 | DHFR                       | dihydrofolate reductase                                                                                                                                |
| 1,00 | CST11                      | cystatin 11                                                                                                                                            |
| 1,00 | ZPR1                       | ZPR1 zinc finger                                                                                                                                       |
| 1,00 | SMOX                       | spermine oxidase                                                                                                                                       |
| 1,00 | UBE4A                      | ubiquitination factor E4A                                                                                                                              |
| 1,00 | SLC52A2                    | solute carrier family 52 (riboflavin transporter), member 2                                                                                            |
| 1,00 | MED12L                     | mediator complex subunit 12 like                                                                                                                       |
| 1,00 | boyboy; RP4-630A11.3; LEPR | Transcript Identified by AceView; Jeck2013 ALT_ACCEPTOR, ALT_DONOR, coding, INTERNAL, intronic best transcript NM_001003679; putative novel transcript |
| 1,00 | RNF103-CHMP3; CHMP3        | RNF103-CHMP3 readthrough; charged multivesicular body protein 3                                                                                        |
| 1,00 | IL1RAP                     | interleukin 1 receptor accessory protein                                                                                                               |
| 1,00 | CBWD1                      | COBW domain containing 1                                                                                                                               |
| 1,00 | ST8SIA3                    | ST8 alpha-N-acetyl-neuraminide alpha-2,8-sialyltransferase 3                                                                                           |
| 1,00 | TBC1D1                     | TBC1 (tre-2/USP6, BUB2, cdc16) domain family, member 1                                                                                                 |
| 1,00 | SUCLA2                     | succinate-CoA ligase, ADP-forming, beta subunit                                                                                                        |
| 1,00 | SMPDL3B                    | sphingomyelin phosphodiesterase, acid-like 3B                                                                                                          |
| 1,00 | CDH7                       | cadherin 7, type 2                                                                                                                                     |
| 1,00 | OSBPL11                    | oxysterol binding protein-like 11                                                                                                                      |
| 1,00 | GSTA4                      | glutathione S-transferase alpha 4                                                                                                                      |
| 1,00 | HHAT                       | hedgehog acyltransferase                                                                                                                               |
| 1,00 | CDK7                       | cyclin-dependent kinase 7                                                                                                                              |
| 1,00 | GPC6                       | glypican 6                                                                                                                                             |

|      |                                        |                                                                                                                                                                                                                                                                                                                                                                                                                                                                                                        |
|------|----------------------------------------|--------------------------------------------------------------------------------------------------------------------------------------------------------------------------------------------------------------------------------------------------------------------------------------------------------------------------------------------------------------------------------------------------------------------------------------------------------------------------------------------------------|
| 1,00 | UPK3BL;<br>POLR2J2                     | uropalakin 3B-like; polymerase (RNA) II (DNA directed) polypeptide J2                                                                                                                                                                                                                                                                                                                                                                                                                                  |
| 1,00 | RBL1                                   | retinoblastoma-like 1                                                                                                                                                                                                                                                                                                                                                                                                                                                                                  |
| 1,00 | CDCA4                                  | cell division cycle associated 4                                                                                                                                                                                                                                                                                                                                                                                                                                                                       |
| 1,00 | LOC102724279;<br>AC004791.2;<br>nimure | uncharacterized LOC102724279; Transcript Identified by AceView; novel transcript                                                                                                                                                                                                                                                                                                                                                                                                                       |
| 1,00 | PODXL                                  | podocalyxin-like                                                                                                                                                                                                                                                                                                                                                                                                                                                                                       |
| 1,00 | PLBD2                                  | phospholipase B domain containing 2                                                                                                                                                                                                                                                                                                                                                                                                                                                                    |
| 1,00 | FZD7                                   | frizzled class receptor 7                                                                                                                                                                                                                                                                                                                                                                                                                                                                              |
| 1,00 | PSG4                                   | pregnancy specific beta-1-glycoprotein 4                                                                                                                                                                                                                                                                                                                                                                                                                                                               |
| 1,00 | LINC00668                              | long intergenic non-protein coding RNA 668                                                                                                                                                                                                                                                                                                                                                                                                                                                             |
| 1,00 | SNORD102;<br>SNORA27;<br>RPL21         | small nucleolar RNA, C/D box 102; small nucleolar RNA, H/ACA box 27; ribosomal protein L21                                                                                                                                                                                                                                                                                                                                                                                                             |
| 1,00 | AGAP1                                  | ArfGAP with GTPase domain, ankyrin repeat and PH domain 1                                                                                                                                                                                                                                                                                                                                                                                                                                              |
| 1,00 | IRAK3; MIR6502                         | interleukin 1 receptor associated kinase 3; microRNA 6502                                                                                                                                                                                                                                                                                                                                                                                                                                              |
| 1,00 | HDGFRP3                                | hepatoma-derived growth factor, related protein 3; Hepatoma-derived growth factor-related protein 3 [Source:UniProtKB/Swiss-Prot;Acc:Q9Y3E1]; Transcript Identified by AceView, Entrez Gene ID(s) 50810; Jeck2013, Memczak2013, Salzman2013 ANNOTATED, CDS, coding, INTERNAL, OVCODE, OVEXON best transcript NM_016073; Jeck2013 ALT_ACCEPTOR, ALT_DONOR, coding, INTERNAL, intronic best transcript NM_016073; Salzman2013 ANNOTATED, CDS, coding, INTERNAL, OVCODE, OVEXON best transcript NM_016073 |
| 1,00 | TMEM101                                | transmembrane protein 101                                                                                                                                                                                                                                                                                                                                                                                                                                                                              |
| 1,00 | GPR21;<br>RABGAP1                      | G protein-coupled receptor 21; RAB GTPase activating protein 1                                                                                                                                                                                                                                                                                                                                                                                                                                         |
| 1,00 | SPRTN                                  | SprT-like N-terminal domain                                                                                                                                                                                                                                                                                                                                                                                                                                                                            |
| 1,00 | SMC3                                   | structural maintenance of chromosomes 3                                                                                                                                                                                                                                                                                                                                                                                                                                                                |
| 1,00 | C1orf159                               | chromosome 1 open reading frame 159                                                                                                                                                                                                                                                                                                                                                                                                                                                                    |
| 1,00 | DAPP1                                  | dual adaptor of phosphotyrosine and 3-phosphoinositides                                                                                                                                                                                                                                                                                                                                                                                                                                                |
| 1,00 | RNF185                                 | ring finger protein 185                                                                                                                                                                                                                                                                                                                                                                                                                                                                                |
| 1,00 | NDUFAF6                                | NADH dehydrogenase (ubiquinone) complex I, assembly factor 6                                                                                                                                                                                                                                                                                                                                                                                                                                           |
| 1,00 | NDUFS1;<br>GCSHP3                      | NADH dehydrogenase (ubiquinone) Fe-S protein 1, 75kDa (NADH-coenzyme Q reductase); glycine cleavage system protein H (aminomethyl carrier) pseudogene 3                                                                                                                                                                                                                                                                                                                                                |
| 1,00 | CACNA1B                                | calcium channel, voltage-dependent, N type, alpha 1B subunit                                                                                                                                                                                                                                                                                                                                                                                                                                           |
| 1,00 | RNF130                                 | ring finger protein 130                                                                                                                                                                                                                                                                                                                                                                                                                                                                                |
| 1,00 | H1FOO                                  | H1 histone family, member O, oocyte-specific                                                                                                                                                                                                                                                                                                                                                                                                                                                           |

|      |                    |                                                                                                                 |
|------|--------------------|-----------------------------------------------------------------------------------------------------------------|
| 1,00 | LRRC16A            | Transcript Identified by AceView, Entrez Gene ID(s)<br>55604                                                    |
| 1,00 | FH                 | fumarate hydratase                                                                                              |
| 1,00 | LATS2              | large tumor suppressor kinase 2                                                                                 |
| 1,00 | IFITM2             | interferon induced transmembrane protein 2                                                                      |
| 1,00 | C18orf21           | chromosome 18 open reading frame 21                                                                             |
| 1,00 | MRPS33             | mitochondrial ribosomal protein S33                                                                             |
| 1,00 | MAGEA2;<br>MAGEA2B | MAGE family member A2; MAGE family member<br>A2B                                                                |
| 1,00 | C10orf10           | chromosome 10 open reading frame 10                                                                             |
| 1,00 | SERPING1           | serpin peptidase inhibitor, clade G (C1 inhibitor),<br>member 1                                                 |
| 1,00 | PSMC1              | proteasome 26S subunit, ATPase 1                                                                                |
| 1,00 | METTL14            | methyltransferase like 14                                                                                       |
| 1,00 | GYPA               | glycophorin A (MNS blood group)                                                                                 |
| 1,00 | SHROOM2            | shroom family member 2                                                                                          |
| 1,00 | CT45A5             | cancer/testis antigen family 45, member A5                                                                      |
| 1,00 | PFDN1              | prefoldin subunit 1                                                                                             |
| 1,00 | ANXA2              | annexin A2                                                                                                      |
| 1,00 | ANAPC15            | anaphase promoting complex subunit 15                                                                           |
| 1,00 | OR2J2              | olfactory receptor, family 2, subfamily J, member 2                                                             |
| 1,00 | ACOT6              | acyl-CoA thioesterase 6                                                                                         |
| 1,00 | PRR5L              | proline rich 5 like                                                                                             |
| 1,00 | PDXDC2P            | pyridoxal-dependent decarboxylase domain containing<br>2, pseudogene                                            |
| 1,00 | PHACTR4            | phosphatase and actin regulator 4                                                                               |
| 1,00 | OSBPL10            | oxysterol binding protein-like 10                                                                               |
| 1,00 | HSD17B4            | hydroxysteroid (17-beta) dehydrogenase 4                                                                        |
| 1,00 | SSSCA1             | Sjogren syndrome/scleroderma autoantigen 1                                                                      |
| 1,00 | MORF4L2            | mortality factor 4 like 2                                                                                       |
| 1,00 | PCGF2              | polycomb group ring finger 2                                                                                    |
| 1,00 | ATG9A              | autophagy related 9A                                                                                            |
| 1,00 | ZMYND8             | zinc finger, MYND-type containing 8                                                                             |
| 1,00 | EPB41              | Memczak2013 ALT_ACCEPTOR, ALT_DONOR,<br>coding, INTERNAL, intronic best transcript<br>NM_001166007              |
| 1,00 | SLC9C1             | solute carrier family 9, subfamily C (Na <sup>+</sup> -transporting<br>carboxylic acid decarboxylase), member 1 |
| 1,00 | RGAG1              | retrotransposon gag domain containing 1                                                                         |
| 1,00 | RPS6KA1            | ribosomal protein S6 kinase, 90kDa, polypeptide 1                                                               |
| 1,00 | ADCY3              | adenylate cyclase 3                                                                                             |
| 1,00 | PIGV               | phosphatidylinositol glycan anchor biosynthesis class<br>V                                                      |
| 1,00 | ZNF613             | zinc finger protein 613                                                                                         |
| 1,00 | LIFR               | leukemia inhibitory factor receptor alpha                                                                       |
| 1,00 | ZNF197             | zinc finger protein 197                                                                                         |
| 1,00 | HAT1               | histone acetyltransferase 1                                                                                     |
| 1,00 | METTL2B            | methyltransferase like 2B                                                                                       |
| 1,00 | ZNF737             | zinc finger protein 737                                                                                         |

|      |                           |                                                                                            |
|------|---------------------------|--------------------------------------------------------------------------------------------|
| 1,00 | METTL9                    | methyltransferase like 9                                                                   |
| 1,00 | PQBP1                     | polyglutamine binding protein 1                                                            |
| 1,00 | AARD                      | alanine and arginine rich domain containing protein                                        |
| 1,00 | TMEM89                    | transmembrane protein 89                                                                   |
| 1,00 | TSKU                      | tsukushi, small leucine rich proteoglycan                                                  |
| 1,00 | DNAJC1                    | DnaJ (Hsp40) homolog, subfamily C, member 1                                                |
| 1,00 | PPHLN1                    | periphilin 1                                                                               |
| 1,00 | SLC10A7                   | solute carrier family 10, member 7                                                         |
| 1,00 | LOC389602;<br>AC021218.2  | uncharacterized LOC389602; novel transcript                                                |
| 1,00 | FAM205C                   | family with sequence similarity 205, member C                                              |
| 1,00 | AURKB                     | aurora kinase B                                                                            |
| 1,00 | CNBP                      | CCHC-type zinc finger, nucleic acid binding protein                                        |
| 1,00 | TBC1D3L                   | TBC1 domain family, member 3L                                                              |
| 1,00 | PPP1R42                   | protein phosphatase 1, regulatory subunit 42                                               |
| 1,00 | MBOAT1                    | membrane bound O-acyltransferase domain containing 1                                       |
| 1,00 | DEPDC7                    | DEP domain containing 7                                                                    |
| 1,00 | NMRK2                     | nicotinamide riboside kinase 2                                                             |
| 1,00 | RNF166                    | ring finger protein 166                                                                    |
| 1,00 | CCDC137                   | coiled-coil domain containing 137                                                          |
| 1,00 | C4orf32                   | chromosome 4 open reading frame 32                                                         |
| 1,00 | FTCD                      | formimidoyltransferase cyclodeaminase                                                      |
| 1,00 | ZNF780B                   | zinc finger protein 780B                                                                   |
| 1,00 | TTYH1                     | tweety family member 1                                                                     |
| 1,00 | TMEM209                   | transmembrane protein 209                                                                  |
| 1,00 | RPS2; SNORA64;<br>SNORA10 | ribosomal protein S2; small nucleolar RNA, H/ACA box 64; small nucleolar RNA, H/ACA box 10 |
| 1,00 | PPP4R2                    | protein phosphatase 4, regulatory subunit 2                                                |
| 1,00 | MPZL3                     | myelin protein zero-like 3                                                                 |
| 1,00 | NIPSNAP1                  | nipsnap homolog 1 (C. elegans)                                                             |
| 1,00 | SLC25A36                  | solute carrier family 25 (pyrimidine nucleotide carrier), member 36                        |
| 1,00 | OR2M7                     | olfactory receptor, family 2, subfamily M, member 7                                        |
| 1,00 | PPP3CA                    | protein phosphatase 3, catalytic subunit, alpha isozyme                                    |
| 1,00 | DEFB133                   | defensin, beta 133                                                                         |
| 1,00 | TTC38                     | Memczak2013 ALT_ACCEPTOR, ALT_DONOR, coding, INTERNAL, intronic best transcript NM_017931  |
| 1,00 | CCL25                     | chemokine (C-C motif) ligand 25                                                            |
| 1,00 | GTSF1                     | gametocyte specific factor 1                                                               |
| 1,00 | ABHD17B                   | abhydrolase domain containing 17B                                                          |
| 1,00 | CD74                      | CD74 molecule, major histocompatibility complex, class II invariant chain                  |
| 1,00 | PVR                       | poliovirus receptor                                                                        |
| 1,00 | OR1S1                     | olfactory receptor, family 1, subfamily S, member 1 (gene/pseudogene)                      |
| 1,00 | YIPF5                     | Yip1 domain family member 5                                                                |

|      |                   |                                                                                                                            |
|------|-------------------|----------------------------------------------------------------------------------------------------------------------------|
| 1,00 | PLIN2             | perilipin 2                                                                                                                |
| 1,00 | DFNB31            | deafness, autosomal recessive 31                                                                                           |
| 1,00 | ZNF471            | zinc finger protein 471                                                                                                    |
| 1,00 | KIAA0895L         | KIAA0895-like                                                                                                              |
| 1,00 | C8orf33           | chromosome 8 open reading frame 33                                                                                         |
| 1,00 | HDAC2             | histone deacetylase 2                                                                                                      |
| 1,00 | HMG2              | high mobility group nucleosomal binding domain 2                                                                           |
| 1,00 | WDR35             | WD repeat domain 35                                                                                                        |
| 1,00 | SOX5              | SRY box 5                                                                                                                  |
| 1,00 | SNCG              | synuclein gamma                                                                                                            |
| 1,00 | IPO7; SNORA23     | importin 7; small nucleolar RNA, H/ACA box 23                                                                              |
| 1,00 | ADAD2             | adenosine deaminase domain containing 2                                                                                    |
| 1,00 | ZER1              | zyg-11 related, cell cycle regulator                                                                                       |
| 1,00 | VTCN1             | V-set domain containing T cell activation inhibitor 1                                                                      |
| 1,00 | STAT2             | signal transducer and activator of transcription 2                                                                         |
| 1,00 | SLC22A4           | solute carrier family 22 (organic cation/zwitterion transporter), member 4                                                 |
| 1,00 | GART              | phosphoribosylglycinamide formyltransferase, phosphoribosylglycinamide synthetase, phosphoribosylaminoimidazole synthetase |
| 1,00 | OR52I1            | olfactory receptor, family 52, subfamily I, member 1                                                                       |
| 1,00 | PHRF1             | PHD and ring finger domains 1                                                                                              |
| 1,00 | SCN2A             | sodium channel, voltage gated, type II alpha subunit                                                                       |
| 1,00 | ADGRB2            | adhesion G protein-coupled receptor B2                                                                                     |
| 1,00 | MROH5             | maestro heat-like repeat family member 5                                                                                   |
| 1,00 | PFDN2             | prefoldin subunit 2                                                                                                        |
| 1,00 | NPIP5             | nuclear pore complex interacting protein family, member B5                                                                 |
| 1,00 | CT45A10           | cancer/testis antigen family 45, member A10                                                                                |
| 1,00 | CCDC51            | coiled-coil domain containing 51                                                                                           |
| 1,00 | USP15; MIR6125    | ubiquitin specific peptidase 15; microRNA 6125                                                                             |
| 1,00 | EBF2              | early B-cell factor 2                                                                                                      |
| 1,00 | HOPX              | HOP homeobox                                                                                                               |
| 1,00 | SOX5              | Transcript Identified by AceView, Entrez Gene ID(s) 6660                                                                   |
| 1,00 | MUC2              | mucin 2, oligomeric mucus/gel-forming                                                                                      |
| 1,00 | CRIP1             | cysteine-rich protein 1 (intestinal)                                                                                       |
| 1,00 | LAX1              | lymphocyte transmembrane adaptor 1                                                                                         |
| 1,00 | GOLGA8J; GOLGA8IP | golgin A8 family, member J; golgin A8 family, member I, pseudogene                                                         |
| 1,00 | FGD5              | FYVE, RhoGEF and PH domain containing 5                                                                                    |
| 1,00 | CLDN25            | claudin 25                                                                                                                 |
| 1,00 | RBMX2             | RNA binding motif protein, X-linked 2                                                                                      |
| 1,00 | UBXN2B            | UBX domain protein 2B                                                                                                      |
| 1,00 | WEE1              | WEE1 G2 checkpoint kinase                                                                                                  |
| 1,00 | AMELY             | amelogenin, Y-linked                                                                                                       |
| 1,00 | CXCR5             | chemokine (C-X-C motif) receptor 5                                                                                         |
| 1,00 | GCNT7             | glucosaminyl (N-acetyl) transferase family member 7                                                                        |
| 1,00 | DUS1L             | dihydrouridine synthase 1-like                                                                                             |
| 1,00 | TNRC6A            | trinucleotide repeat containing 6A                                                                                         |

|      |                                |                                                                           |
|------|--------------------------------|---------------------------------------------------------------------------|
| 1,00 | ABRACL                         | ABRA C-terminal like                                                      |
| 1,00 | ARHGDIG                        | Rho GDP dissociation inhibitor (GDI) gamma                                |
| 1,00 | IL5RA                          | interleukin 5 receptor, alpha                                             |
| 1,00 | HMBOX1                         | homeobox containing 1                                                     |
| 1,00 | CDYL                           | chromodomain protein, Y-like                                              |
| 1,00 | SYN3                           | synapsin III                                                              |
| 1,00 | BCS1L                          | BCS1 homolog, ubiquinol-cytochrome c reductase complex chaperone          |
| 1,00 | EIF2AK2                        | eukaryotic translation initiation factor 2-alpha kinase 2                 |
| 1,00 | OLIG3                          | oligodendrocyte transcription factor 3                                    |
| 1,00 | NR3C1                          | nuclear receptor subfamily 3, group C, member 1 (glucocorticoid receptor) |
| 1,00 | EPPIN-WFDC6                    | EPPIN-WFDC6 readthrough                                                   |
| 1,00 | CPSF3L; MIR6727                | cleavage and polyadenylation specific factor 3-like; microRNA 6727        |
| 1,00 | KCNH2                          | potassium channel, voltage gated eag related subfamily H, member 2        |
| 1,00 | KCNAB2                         | potassium channel, voltage gated subfamily A regulatory beta subunit 2    |
| 1,00 | PDCD2                          | programmed cell death 2                                                   |
| 1,00 | DGKD                           | diacylglycerol kinase, delta 130kDa                                       |
| 1,00 | KPNA2                          | karyopherin alpha 2 (RAG cohort 1, importin alpha 1)                      |
| 1,00 | RPS6KA1                        | ribosomal protein S6 kinase, 90kDa, polypeptide 1                         |
| 1,00 | GALNT5                         | polypeptide N-acetylgalactosaminyltransferase 5                           |
| 1,00 | UAP1                           | UDP-N-acetylglucosamine pyrophosphorylase 1                               |
| 1,00 | OCIAD1                         | Transcript Identified by AceView, Entrez Gene ID(s) 54940                 |
| 1,00 | IKZF2                          | IKAROS family zinc finger 2                                               |
| 1,00 | XBP1                           | X-box binding protein 1                                                   |
| 1,00 | VPS29                          | VPS29 retromer complex component                                          |
| 1,00 | EPB41L4A-AS2                   | EPB41L4A antisense RNA 2 (head to head)                                   |
| 1,00 | DCLK3                          | doublecortin-like kinase 3                                                |
| 1,00 | KIAA1614                       | KIAA1614                                                                  |
| 1,00 | FAM50B                         | family with sequence similarity 50, member B                              |
| 1,00 | VPS25                          | vacuolar protein sorting 25 homolog (S. cerevisiae)                       |
| 1,00 | SSU72                          | SSU72 homolog, RNA polymerase II CTD phosphatase                          |
| 1,00 | MANSC1                         | MANSC domain containing 1                                                 |
| 1,00 | CHD5                           | chromodomain helicase DNA binding protein 5                               |
| 1,00 | SUZ12                          | SUZ12 polycomb repressive complex 2 subunit                               |
| 1,00 | VCP                            | valosin containing protein                                                |
| 1,00 | RNF139                         | ring finger protein 139                                                   |
| 1,00 | CORO1B                         | coronin, actin binding protein, 1B                                        |
| 1,00 | GSK3A                          | glycogen synthase kinase 3 alpha                                          |
| 1,00 | MAN1B1                         | mannosidase, alpha, class 1B, member 1                                    |
| 1,00 | MAGEA10-MAGEA5; RP11-1007I13.4 | MAGEA10-MAGEA5 readthrough; novel transcript                              |
| 1,00 | TMEM65                         | transmembrane protein 65                                                  |

|      |                      |                                                                                                              |
|------|----------------------|--------------------------------------------------------------------------------------------------------------|
| 1,00 | TP53BP2              | tumor protein p53 binding protein 2                                                                          |
| 1,00 | DUSP9                | dual specificity phosphatase 9                                                                               |
| 1,00 | DDX19B               | DEAD (Asp-Glu-Ala-Asp) box polypeptide 19B                                                                   |
| 1,00 | FAM72B               | family with sequence similarity 72, member B                                                                 |
| 1,00 | ADH6                 | alcohol dehydrogenase 6 (class V)                                                                            |
| 1,00 | ATP2C1               | ATPase, Ca <sup>++</sup> transporting, type 2C, member 1                                                     |
| 1,00 | RCCD1                | RCC1 domain containing 1                                                                                     |
| 1,00 | SLC9A3R1;<br>MIR3615 | solute carrier family 9, subfamily A (NHE3, cation proton antiporter 3), member 3 regulator 1; microRNA 3615 |
| 1,00 | RPS6KA1              | ribosomal protein S6 kinase, 90kDa, polypeptide 1                                                            |
| 1,00 | GJB7                 | gap junction protein beta 7                                                                                  |
| 1,00 | IQCB1                | IQ motif containing B1                                                                                       |
| 1,00 | DGKQ                 | diacylglycerol kinase theta                                                                                  |
| 1,00 | ZFY                  | zinc finger protein, Y-linked                                                                                |
| 1,00 | VMP1; MIR21          | vacuole membrane protein 1; microRNA 21                                                                      |
| 1,00 | NPFFR1               | neuropeptide FF receptor 1                                                                                   |
| 1,00 | ALDH1A1              | aldehyde dehydrogenase 1 family, member A1                                                                   |
| 1,00 | B4GAT1               | beta-1,4-glucuronyltransferase 1                                                                             |
| 1,00 | KIF20B               | kinesin family member 20B                                                                                    |
| 1,00 | REN                  | renin                                                                                                        |
| 1,00 | YME1L1               | YME1-like 1 ATPase                                                                                           |
| 1,00 | SLC2A5               | solute carrier family 2 (facilitated glucose/fructose transporter), member 5                                 |
| 1,00 | SPANXB1              | SPANX family, member B1                                                                                      |
| 1,00 | PWP2                 | PWP2 periodic tryptophan protein homolog (yeast)                                                             |
| 1,00 | RAD51C               | RAD51 paralog C                                                                                              |
| 1,00 | CCPG1; MIR628        | cell cycle progression 1; microRNA 628                                                                       |
| 1,00 | DCN                  | decorin                                                                                                      |
| 1,00 | LRRC27               | leucine rich repeat containing 27                                                                            |
| 1,00 | RBM15                | RNA binding motif protein 15                                                                                 |
| 1,00 | DNAI1                | Transcript Identified by AceView, Entrez Gene ID(s) 27019                                                    |
| 1,00 | SNX4                 | sorting nexin 4                                                                                              |
| 1,00 | MRPL28               | mitochondrial ribosomal protein L28                                                                          |
| 1,00 | ZNF202               | zinc finger protein 202                                                                                      |
| 1,00 | MAGEC1               | MAGE family member C1                                                                                        |
| 1,00 | PFKP                 | phosphofructokinase, platelet                                                                                |
| 1,00 | TMEM261              | transmembrane protein 261                                                                                    |
| 1,00 | TMEM91               | transmembrane protein 91                                                                                     |
| 1,00 | NFX1                 | nuclear transcription factor, X-box binding 1                                                                |
| 1,00 | SPHK1                | sphingosine kinase 1                                                                                         |
| 1,00 | FXR1                 | fragile X mental retardation, autosomal homolog 1                                                            |
| 1,00 | ATP6V1B2             | ATPase, H <sup>+</sup> transporting, lysosomal 56/58kDa, V1 subunit B2                                       |
| 1,00 | RPL29                | ribosomal protein L29                                                                                        |
| 1,00 | KRTAP19-4            | keratin associated protein 19-4                                                                              |
| 1,00 | MACROD1              | MACRO domain containing 1                                                                                    |
| 1,00 | FAM47A               | family with sequence similarity 47, member A                                                                 |
| 1,00 | DOK6                 | docking protein 6                                                                                            |

|      |               |                                                                                |
|------|---------------|--------------------------------------------------------------------------------|
| 1,00 | FKBP7         | FK506 binding protein 7                                                        |
| 1,00 | EFHC1         | EF-hand domain (C-terminal) containing 1                                       |
| 1,00 | TPT1; SNORA31 | tumor protein, translationally-controlled 1; small nucleolar RNA, H/ACA box 31 |
| 1,00 | APOH          | apolipoprotein H (beta-2-glycoprotein I)                                       |
| 1,00 | PABPC4        | poly(A) binding protein, cytoplasmic 4 (inducible form)                        |
| 1,00 | COPS4         | COP9 signalosome subunit 4                                                     |
| 1,00 | TAS2R8        | taste receptor, type 2, member 8                                               |
| 1,00 | WDR55         | WD repeat domain 55                                                            |
| 1,00 | MAGOHB        | mago homolog B, exon junction complex core component                           |
| 1,00 | STK38         | serine/threonine kinase 38                                                     |
| 1,00 | PDS5B         | PDS5 cohesin associated factor B                                               |
| 1,00 | CLEC16A       | C-type lectin domain family 16, member A                                       |
| 1,00 | NCAPG         | non-SMC condensin I complex subunit G                                          |
| 1,00 | NDUFB2        | NADH dehydrogenase (ubiquinone) 1 beta subcomplex, 2, 8kDa                     |
| 1,00 | CWC22         | CWC22 homolog, spliceosome-associated protein                                  |
| 1,00 | AP4B1         | adaptor-related protein complex 4, beta 1 subunit                              |
| 1,00 | TAC4          | tachykinin 4 (hemokinin)                                                       |
| 1,00 | ORC1          | origin recognition complex subunit 1                                           |
| 1,00 | PLPP5         | phospholipid phosphatase 5                                                     |
| 1,00 | HCAR3         | hydroxycarboxylic acid receptor 3                                              |
| 1,00 | LRIG3         | leucine-rich repeats and immunoglobulin-like domains 3                         |
| 1,00 | ZDHHC3        | zinc finger, DHHC-type containing 3                                            |
| 1,00 | KRT16         | keratin 16, type I                                                             |
| 1,00 | CLVS1         | clavesin 1                                                                     |
| 1,00 | LINC01270     | long intergenic non-protein coding RNA 1270                                    |
| 1,00 | VPS18         | VPS18 CORVET/HOPS core subunit                                                 |
| 1,00 | HYAL2         | hyaluronoglucosaminidase 2                                                     |
| 1,00 | FCRL2         | Fc receptor-like 2                                                             |
| 1,00 | CHST5         | carbohydrate (N-acetylglucosamine 6-O) sulfotransferase 5                      |
| 1,00 | GSPT2         | G1 to S phase transition 2                                                     |
| 1,00 | THUMPD3       | THUMP domain containing 3                                                      |
| 1,00 | GNAQ          | guanine nucleotide binding protein (G protein), q polypeptide                  |
| 1,00 | TSKS          | testis-specific serine kinase substrate                                        |
| 1,00 | LRRC37B       | leucine rich repeat containing 37B                                             |
| 1,00 | NUP160        | nucleoporin 160kDa                                                             |
| 1,00 | KCNMB4        | potassium channel subfamily M regulatory beta subunit 4                        |
| 1,00 | UBE2K         | ubiquitin conjugating enzyme E2K                                               |
| 1,00 | FFAR1         | free fatty acid receptor 1                                                     |
| 1,00 | OR11H6        | olfactory receptor, family 11, subfamily H, member 6                           |
| 1,00 | ZDHHC4        | zinc finger, DHHC-type containing 4                                            |
| 1,00 | ADPGK         | ADP-dependent glucokinase                                                      |
| 1,00 | MYL6B         | myosin light chain 6B                                                          |

|      |                                               |                                                                                                                                                                                                                                                                                                                                                      |
|------|-----------------------------------------------|------------------------------------------------------------------------------------------------------------------------------------------------------------------------------------------------------------------------------------------------------------------------------------------------------------------------------------------------------|
| 1,00 | RND1                                          | Rho family GTPase 1                                                                                                                                                                                                                                                                                                                                  |
| 1,00 | MTX3                                          | metaxin 3                                                                                                                                                                                                                                                                                                                                            |
| 1,00 | SMLR1                                         | small leucine-rich protein 1                                                                                                                                                                                                                                                                                                                         |
| 1,00 | SLC38A9                                       | Transcript Identified by AceView, Entrez Gene ID(s) 153129                                                                                                                                                                                                                                                                                           |
| 1,00 | LRFN4                                         | leucine rich repeat and fibronectin type III domain containing 4                                                                                                                                                                                                                                                                                     |
| 1,00 | BSG                                           | basigin (Ok blood group)                                                                                                                                                                                                                                                                                                                             |
| 1,00 | PVRL1                                         | poliovirus receptor-related 1 (herpesvirus entry mediator C)                                                                                                                                                                                                                                                                                         |
| 1,00 | COPB2                                         | coatamer protein complex subunit beta 2 (beta prime)                                                                                                                                                                                                                                                                                                 |
| 1,00 | EPHB6                                         | EPH receptor B6                                                                                                                                                                                                                                                                                                                                      |
| 1,00 | STOX2                                         | storkhead box 2                                                                                                                                                                                                                                                                                                                                      |
| 1,00 | ACSF2                                         | acyl-CoA synthetase family member 2                                                                                                                                                                                                                                                                                                                  |
| 1,00 | PRRC1                                         | proline-rich coiled-coil 1                                                                                                                                                                                                                                                                                                                           |
| 1,00 | LOC338797;<br>RP13-507P19.2;<br>RP13-507P19.1 | uncharacterized LOC338797; novel transcript                                                                                                                                                                                                                                                                                                          |
| 0,99 | LOC100130370;<br>RP11-1055B8.3                | uncharacterized LOC100130370; novel transcript                                                                                                                                                                                                                                                                                                       |
| 0,99 | PRODH2                                        | proline dehydrogenase (oxidase) 2                                                                                                                                                                                                                                                                                                                    |
| 0,99 | BCL9                                          | B-cell CLL/lymphoma 9                                                                                                                                                                                                                                                                                                                                |
| 0,99 | C15orf40                                      | chromosome 15 open reading frame 40                                                                                                                                                                                                                                                                                                                  |
| 0,99 | THPO                                          | thrombopoietin                                                                                                                                                                                                                                                                                                                                       |
| 0,99 | OR2A42; OR2A1                                 | olfactory receptor, family 2, subfamily A, member 42;<br>olfactory receptor, family 2, subfamily A, member 1                                                                                                                                                                                                                                         |
| 0,99 | C9orf173                                      | chromosome 9 open reading frame 173                                                                                                                                                                                                                                                                                                                  |
| 0,99 | PRAMEF18                                      | PRAME family member 18                                                                                                                                                                                                                                                                                                                               |
| 0,99 | NAA16                                         | N(alpha)-acetyltransferase 16, NatA auxiliary subunit                                                                                                                                                                                                                                                                                                |
| 0,99 | TIPARP                                        | TCDD-inducible poly(ADP-ribose) polymerase                                                                                                                                                                                                                                                                                                           |
| 0,99 | LOC728554;<br>THOC3                           | THO complex 3 pseudogene; Homo sapiens THO complex 3, mRNA (cDNA clone MGC:5469 IMAGE:3451612), complete cds.; Homo sapiens THO complex 3, mRNA (cDNA clone MGC:87233 IMAGE:5262880), complete cds.; Salzman2013 ANNOTATED, INTERNAL, ncRNA, OVERLAPTX, OVEXON best transcript NR_003615; Transcript Identified by AceView, Entrez Gene ID(s) 728554 |
| 0,99 | PRSS8                                         | protease, serine, 8                                                                                                                                                                                                                                                                                                                                  |
| 0,99 | C6orf223                                      | chromosome 6 open reading frame 223                                                                                                                                                                                                                                                                                                                  |
| 0,99 | NDUFAF7                                       | NADH dehydrogenase (ubiquinone) complex I, assembly factor 7                                                                                                                                                                                                                                                                                         |
| 0,99 | SEN3-EIF4A1                                   | SEN3-EIF4A1 readthrough (NMD candidate)                                                                                                                                                                                                                                                                                                              |
| 0,99 | ADAMTS18                                      | ADAM metalloproteinase with thrombospondin type 1 motif 18                                                                                                                                                                                                                                                                                           |
| 0,99 | TBX21                                         | T-box 21                                                                                                                                                                                                                                                                                                                                             |
| 0,99 | PYGL                                          | phosphorylase, glycogen, liver                                                                                                                                                                                                                                                                                                                       |
| 0,99 | PRPF40A                                       | PRP40 pre-mRNA processing factor 40 homolog A                                                                                                                                                                                                                                                                                                        |
| 0,99 | PNMT                                          | phenylethanolamine N-methyltransferase                                                                                                                                                                                                                                                                                                               |

|      |           |                                                                     |
|------|-----------|---------------------------------------------------------------------|
| 0,99 | ABTB1     | ankyrin repeat and BTB (POZ) domain containing 1                    |
| 0,99 | CRTC1     | CREB regulated transcription coactivator 1                          |
| 0,99 | GAMT      | guanidinoacetate N-methyltransferase                                |
| 0,99 | PTRF      | polymerase I and transcript release factor                          |
| 0,99 | NUDT6     | nudix hydrolase 6                                                   |
| 0,99 | ZNF579    | zinc finger protein 579                                             |
| 0,99 | HMG20A    | Transcript Identified by AceView, Entrez Gene ID(s)<br>10363        |
| 0,99 | TECTA     | tectorin alpha                                                      |
| 0,99 | ANKRD33   | ankyrin repeat domain 33                                            |
| 0,99 | ANXA2R    | annexin A2 receptor                                                 |
| 0,99 | TAX1BP3   | Tax1 (human T-cell leukemia virus type I) binding<br>protein 3      |
| 0,99 | B4GALNT4  | beta-1,4-N-acetyl-galactosaminyl transferase 4                      |
| 0,99 | C1orf27   | chromosome 1 open reading frame 27                                  |
| 0,99 | NOTUM     | notum pectinacylesterase homolog (Drosophila)                       |
| 0,99 | ARHGAP36  | Rho GTPase activating protein 36                                    |
| 0,99 | SV2C      | synaptic vesicle glycoprotein 2C                                    |
| 0,99 | IGF2      | insulin-like growth factor 2                                        |
| 0,99 | RABAC1    | Rab acceptor 1 (prenylated)                                         |
| 0,99 | WDR82     | WD repeat domain 82                                                 |
| 0,99 | RCSD1     | RCSD domain containing 1                                            |
| 0,99 | GID8      | GID complex subunit 8                                               |
| 0,99 | CHAD      | chondroadherin                                                      |
| 0,99 | RBM10     | RNA binding motif protein 10                                        |
| 0,99 | DYNLRB2   | dynein, light chain, roadblock-type 2                               |
| 0,99 | ZNF148    | zinc finger protein 148                                             |
| 0,99 | GPR35     | G protein-coupled receptor 35                                       |
| 0,99 | OR10AG1   | olfactory receptor, family 10, subfamily AG, member 1               |
| 0,99 | PAPOLG    | poly(A) polymerase gamma                                            |
| 0,99 | MANSC1    | MANSC domain containing 1                                           |
| 0,99 | OR51E1    | olfactory receptor, family 51, subfamily E, member 1                |
| 0,99 | MTMR14    | myotubularin related protein 14                                     |
| 0,99 | NDUFA6    | NADH dehydrogenase (ubiquinone) 1 alpha<br>subcomplex, 6, 14kDa     |
| 0,99 | DACT1     | dishevelled-binding antagonist of beta-catenin 1                    |
| 0,99 | PGS1      | phosphatidylglycerophosphate synthase 1                             |
| 0,99 | FASLG     | Fas ligand (TNF superfamily, member 6)                              |
| 0,99 | TTC39B    | tetratricopeptide repeat domain 39B                                 |
| 0,99 | COL23A1   | collagen, type XXIII, alpha 1                                       |
| 0,99 | SPEG      | SPEG complex locus                                                  |
| 0,99 | RNASEH2B  | ribonuclease H2, subunit B                                          |
| 0,99 | DCUN1D5   | DCN1, defective in cullin neddylation 1, domain<br>containing 5     |
| 0,99 | LRFN5     | leucine rich repeat and fibronectin type III domain<br>containing 5 |
| 0,99 | LRRC29    | leucine rich repeat containing 29                                   |
| 0,99 | OPRD1     | opioid receptor, delta 1                                            |
| 0,99 | SPATA31D4 | SPATA31 subfamily D, member 4                                       |

|      |                                |                                                                                                                                                |
|------|--------------------------------|------------------------------------------------------------------------------------------------------------------------------------------------|
| 0,99 | SRSF9                          | serine/arginine-rich splicing factor 9                                                                                                         |
| 0,99 | LINC01272                      | long intergenic non-protein coding RNA 1272                                                                                                    |
| 0,99 | FHAD1                          | forkhead-associated (FHA) phosphopeptide binding domain 1                                                                                      |
| 0,99 | PRAME                          | preferentially expressed antigen in melanoma                                                                                                   |
| 0,99 | RNF186                         | ring finger protein 186                                                                                                                        |
| 0,99 | HIST1H3H                       | histone cluster 1, H3h                                                                                                                         |
| 0,99 | ZNF155                         | zinc finger protein 155                                                                                                                        |
| 0,99 | SUV39H2                        | suppressor of variegation 3-9 homolog 2 (Drosophila)                                                                                           |
| 0,99 | CTC-453G23.8;<br>CARD8; nekera | Memczak2013 ANTISENSE, CDS, coding, INTERNAL best transcript NM_014959; Transcript Identified by AceView; novel transcript, antisense to CARD8 |
| 0,99 | POU2F1                         | POU class 2 homeobox 1                                                                                                                         |
| 0,99 | YWHAE                          | tyrosine 3-monooxygenase/tryptophan 5-monooxygenase activation protein, epsilon                                                                |
| 0,99 | FAM153A                        | family with sequence similarity 153, member A                                                                                                  |
| 0,99 | GSC                            | goosecoid homeobox                                                                                                                             |
| 0,99 | SCRIB; MIR937                  | scribbled planar cell polarity protein; microRNA 937                                                                                           |
| 0,99 | SYNDIG1                        | synapse differentiation inducing 1                                                                                                             |
| 0,99 | CLDN22                         | claudin 22                                                                                                                                     |
| 0,99 | GALNT12                        | polypeptide N-acetylgalactosaminyltransferase 12                                                                                               |
| 0,99 | CCDC85A                        | Transcript Identified by AceView, Entrez Gene ID(s) 114800                                                                                     |
| 0,99 | EEF1A2                         | eukaryotic translation elongation factor 1 alpha 2                                                                                             |
| 0,99 | EXOSC6                         | exosome component 6                                                                                                                            |
| 0,99 | RIN3                           | Ras and Rab interactor 3                                                                                                                       |
| 0,99 | GHITM                          | growth hormone inducible transmembrane protein                                                                                                 |
| 0,99 | TIMMDC1                        | translocase of inner mitochondrial membrane domain containing 1                                                                                |
| 0,99 | NPEPL1                         | aminopeptidase-like 1                                                                                                                          |
| 0,99 | GRID2IP                        | glutamate receptor, ionotropic, delta 2 (Grid2) interacting protein                                                                            |
| 0,99 | CCDC170                        | coiled-coil domain containing 170                                                                                                              |
| 0,99 | SEC61G                         | Sec61 translocon gamma subunit                                                                                                                 |
| 0,99 | ASB11                          | ankyrin repeat and SOCS box containing 11, E3 ubiquitin protein ligase                                                                         |
| 0,99 | VCX; VCX3A                     | variable charge, X-linked; variable charge, X-linked 3A                                                                                        |
| 0,99 | CRYAA                          | crystallin alpha A                                                                                                                             |
| 0,99 | NKX2-8                         | NK2 homeobox 8                                                                                                                                 |
| 0,99 | GIMAP4                         | GTPase, IMAP family member 4                                                                                                                   |
| 0,99 | MTG2                           | mitochondrial ribosome-associated GTPase 2                                                                                                     |
| 0,99 | SUGT1                          | SGT1 homolog, MIS12 kinetochore complex assembly cochaperone                                                                                   |
| 0,99 | CPPED1                         | calcineurin-like phosphoesterase domain containing 1                                                                                           |
| 0,99 | DAZ2; DAZ3                     | deleted in azoospermia 2; deleted in azoospermia 3                                                                                             |
| 0,99 | RPRM                           | reprimin, TP53 dependent G2 arrest mediator candidate                                                                                          |
| 0,99 | UTP3                           | UTP3, small subunit (SSU) processome component, homolog (S. cerevisiae)                                                                        |

|      |                             |                                                                                                                         |
|------|-----------------------------|-------------------------------------------------------------------------------------------------------------------------|
| 0,99 | B3GNT3                      | UDP-GlcNAc:betaGal beta-1,3-N-acetylglucosaminyltransferase 3                                                           |
| 0,99 | KCND3                       | potassium channel, voltage gated Shal related subfamily D, member 3                                                     |
| 0,99 | LOC115110; RP3-395M20.8     | uncharacterized LOC115110; novel transcript                                                                             |
| 0,99 | ST18                        | suppression of tumorigenicity 18, zinc finger                                                                           |
| 0,99 | FZD3                        | frizzled class receptor 3                                                                                               |
| 0,99 | ALDH1A2                     | aldehyde dehydrogenase 1 family, member A2                                                                              |
| 0,99 | SLC48A1                     | solute carrier family 48 (heme transporter), member 1                                                                   |
| 0,99 | MS4A3                       | membrane-spanning 4-domains, subfamily A, member 3 (hematopoietic cell-specific)                                        |
| 0,99 | EMC6                        | ER membrane protein complex subunit 6                                                                                   |
| 0,99 | TXNDC9                      | thioredoxin domain containing 9                                                                                         |
| 0,99 | PTPN1                       | protein tyrosine phosphatase, non-receptor type 1                                                                       |
| 0,99 | DPYD                        | dihydropyrimidine dehydrogenase                                                                                         |
| 0,99 | SFR1                        | SWI5-dependent homologous recombination repair protein 1                                                                |
| 0,99 | LIN7A                       | lin-7 homolog A (C. elegans)                                                                                            |
| 0,99 | GALT                        | galactose-1-phosphate uridylyltransferase                                                                               |
| 0,99 | MAGEA2                      | MAGE family member A2                                                                                                   |
| 0,99 | KRT24                       | keratin 24, type I                                                                                                      |
| 0,99 | SCG2                        | secretogranin II                                                                                                        |
| 0,99 | LPIN2                       | lipin 2                                                                                                                 |
| 0,99 | FATE1                       | fetal and adult testis expressed 1                                                                                      |
| 0,99 | VWA3A                       | von Willebrand factor A domain containing 3A                                                                            |
| 0,99 | STAT1                       | signal transducer and activator of transcription 1                                                                      |
| 0,99 | ZNF207; MIR632              | zinc finger protein 207; microRNA 632                                                                                   |
| 0,99 | DNAH3                       | dynein, axonemal, heavy chain 3                                                                                         |
| 0,99 | C8orf87                     | chromosome 8 open reading frame 87                                                                                      |
| 0,99 | ST5                         | suppression of tumorigenicity 5                                                                                         |
| 0,99 | DHX29                       | DEAH (Asp-Glu-Ala-His) box polypeptide 29                                                                               |
| 0,99 | BMS1P20; IGLV1-51; IGLV5-52 | BMS1 ribosome biogenesis factor pseudogene 20; immunoglobulin lambda variable 1-51; immunoglobulin lambda variable 5-52 |
| 0,99 | CA13                        | carbonic anhydrase XIII                                                                                                 |
| 0,99 | RDH11                       | retinol dehydrogenase 11 (all-trans/9-cis/11-cis)                                                                       |
| 0,99 | GREM1                       | gremlin 1, DAN family BMP antagonist                                                                                    |
| 0,99 | INPP5E                      | inositol polyphosphate-5-phosphatase E                                                                                  |
| 0,99 | TCAF2                       | TRPM8 channel-associated factor 2                                                                                       |
| 0,99 | MC1R                        | melanocortin 1 receptor (alpha melanocyte stimulating hormone receptor)                                                 |
| 0,99 | ERCC8                       | excision repair cross-complementation group 8                                                                           |
| 0,99 | GATA4                       | GATA binding protein 4                                                                                                  |
| 0,99 | GTF2H5                      | general transcription factor IIH subunit 5                                                                              |
| 0,99 | PRIM1                       | primase, DNA, polypeptide 1 (49kDa)                                                                                     |
| 0,99 | CALD1                       | caldesmon 1                                                                                                             |
| 0,99 | NIP7                        | NIP7, nucleolar pre-rRNA processing protein                                                                             |
| 0,99 | CEP112                      | centrosomal protein 112kDa                                                                                              |
| 0,99 | CT45A8                      | cancer/testis antigen family 45, member A8                                                                              |

|      |                              |                                                                                                            |
|------|------------------------------|------------------------------------------------------------------------------------------------------------|
| 0,99 | CT45A9                       | cancer/testis antigen family 45, member A9                                                                 |
| 0,99 | HIST1H4C                     | histone cluster 1, H4c                                                                                     |
| 0,99 | UBE2V2                       | ubiquitin conjugating enzyme E2 variant 2                                                                  |
| 0,99 | RMND5A                       | required for meiotic nuclear division 5 homolog A                                                          |
| 0,99 | LOC100131303;<br>CTC-479C5.6 | uncharacterized LOC100131303; novel transcript,<br>antisense to DUS2L                                      |
| 0,99 | BHLHE40                      | basic helix-loop-helix family, member e40                                                                  |
| 0,99 | TDP2                         | tyrosyl-DNA phosphodiesterase 2                                                                            |
| 0,99 | CITED2                       | Cbp/p300-interacting transactivator, with Glu/Asp rich<br>carboxy-terminal domain, 2                       |
| 0,99 | TUBD1                        | tubulin, delta 1                                                                                           |
| 0,99 | TCF4                         | Memczak2013 ANTISENSE, coding, INTERNAL,<br>intronic best transcript NM_001243234                          |
| 0,99 | CAAP1                        | caspase activity and apoptosis inhibitor 1                                                                 |
| 0,99 | PRELID3B;<br>ATP5E           | PRELI domain containing 3B; ATP synthase, H+<br>transporting, mitochondrial F1 complex, epsilon<br>subunit |
| 0,99 | CD22; MIR5196                | CD22 molecule; microRNA 5196                                                                               |
| 0,99 | ARHGAP11B                    | Rho GTPase activating protein 11B                                                                          |
| 0,99 | F2RL2                        | coagulation factor II (thrombin) receptor-like 2                                                           |
| 0,99 | IL10RB                       | interleukin 10 receptor, beta                                                                              |
| 0,99 | HAUS6                        | HAUS augmin like complex subunit 6                                                                         |
| 0,99 | HTR4                         | 5-hydroxytryptamine (serotonin) receptor 4, G protein-<br>coupled                                          |
| 0,99 | TRIM49B                      | tripartite motif containing 49B                                                                            |
| 0,99 | SALL2                        | spalt-like transcription factor 2                                                                          |
| 0,99 | NRSN2                        | neurensin 2                                                                                                |
| 0,99 | RPL7A                        | ribosomal protein L7a                                                                                      |
| 0,99 | CCDC14                       | coiled-coil domain containing 14                                                                           |
| 0,99 | GPKOW                        | G-patch domain and KOW motifs                                                                              |
| 0,99 | FER1L5                       | fer-1-like family member 5                                                                                 |
| 0,99 | CBLN3                        | cerebellin 3 precursor                                                                                     |
| 0,99 | LMCD1;<br>LINC00312          | LIM and cysteine-rich domains 1; long intergenic non-<br>protein coding RNA 312                            |
| 0,99 | TM2D2                        | TM2 domain containing 2                                                                                    |
| 0,99 | OR10A3                       | olfactory receptor, family 10, subfamily A, member 3                                                       |
| 0,99 | INHA                         | inhibin alpha                                                                                              |
| 0,99 | LSM8                         | LSM8 homolog, U6 small nuclear RNA associated                                                              |
| 0,99 | RAB28                        | RAB28, member RAS oncogene family                                                                          |
| 0,99 | SPA17                        | sperm autoantigenic protein 17                                                                             |
| 0,99 | ZFP82                        | ZFP82 zinc finger protein                                                                                  |
| 0,99 | TRIQQ                        | triple QxxK/R motif containing                                                                             |
| 0,99 | OR56A4                       | olfactory receptor, family 56, subfamily A, member 4                                                       |
| 0,99 | TTC22                        | tetratricopeptide repeat domain 22                                                                         |
| 0,99 | PPP4R3A                      | protein phosphatase 4, regulatory subunit 3A                                                               |
| 0,99 | GTF2IRD1                     | GTF2I repeat domain containing 1                                                                           |
| 0,99 | RIMS3                        | regulating synaptic membrane exocytosis 3                                                                  |
| 0,99 | RGL2                         | ral guanine nucleotide dissociation stimulator-like 2                                                      |
| 0,99 | EIF4A3                       | eukaryotic translation initiation factor 4A3                                                               |
| 0,99 | COMTD1                       | catechol-O-methyltransferase domain containing 1                                                           |

|      |                        |                                                                                                                               |
|------|------------------------|-------------------------------------------------------------------------------------------------------------------------------|
| 0,99 | HYOU1                  | hypoxia up-regulated 1                                                                                                        |
| 0,99 | NOTO                   | notochord homeobox                                                                                                            |
| 0,99 | MTF2                   | metal response element binding transcription factor 2                                                                         |
| 0,99 | C5                     | complement component 5                                                                                                        |
| 0,99 | PSPC1                  | paraspeckle component 1                                                                                                       |
| 0,99 | SLC52A1                | solute carrier family 52 (riboflavin transporter), member 1                                                                   |
| 0,99 | CAMK2A                 | calcium/calmodulin-dependent protein kinase II alpha                                                                          |
| 0,99 | IER5L                  | immediate early response 5-like                                                                                               |
| 0,99 | CHRNA3                 | cholinergic receptor, nicotinic alpha 3                                                                                       |
| 0,99 | PTK6                   | protein tyrosine kinase 6                                                                                                     |
| 0,99 | FXR2                   | fragile X mental retardation, autosomal homolog 2                                                                             |
| 0,99 | C17orf62               | chromosome 17 open reading frame 62                                                                                           |
| 0,99 | ZNF407                 | zinc finger protein 407                                                                                                       |
| 0,99 | MCM6                   | minichromosome maintenance complex component 6                                                                                |
| 0,99 | COA6                   | cytochrome c oxidase assembly factor 6                                                                                        |
| 0,99 | TP53                   | tumor protein p53                                                                                                             |
| 0,99 | PIIB                   | peptidylprolyl isomerase B (cyclophilin B)                                                                                    |
| 0,99 | KLF10                  | Kruppel-like factor 10                                                                                                        |
| 0,99 | CLDN6                  | claudin 6                                                                                                                     |
| 0,99 | STK24                  | serine/threonine kinase 24                                                                                                    |
| 0,99 | LSM11                  | LSM11, U7 small nuclear RNA associated                                                                                        |
| 0,99 | ABCA5                  | ATP binding cassette subfamily A member 5                                                                                     |
| 0,99 | OR5P3                  | olfactory receptor, family 5, subfamily P, member 3                                                                           |
| 0,99 | RARG                   | retinoic acid receptor, gamma                                                                                                 |
| 0,99 | RPP30                  | ribonuclease P/MRP 30kDa subunit                                                                                              |
| 0,99 | RNF114                 | ring finger protein 114                                                                                                       |
| 0,99 | ZNF701;<br>ZNF137P     | zinc finger protein 701; zinc finger protein 137, pseudogene                                                                  |
| 0,99 | RAB5B                  | RAB5B, member RAS oncogene family                                                                                             |
| 0,99 | GATAD2A;<br>MIR640     | GATA zinc finger domain containing 2A; microRNA 640                                                                           |
| 0,99 | ATP5I                  | ATP synthase, H <sup>+</sup> transporting, mitochondrial Fo complex subunit E                                                 |
| 0,99 | LELP1                  | late cornified envelope-like proline-rich 1                                                                                   |
| 0,99 | GNG12                  | guanine nucleotide binding protein (G protein), gamma 12                                                                      |
| 0,99 | NSMCE4A                | NSE4 homolog A, SMC5-SMC6 complex component                                                                                   |
| 0,99 | RASSF2                 | Memczak2013 ANTISENSE, coding, INTERNAL, UTR3 best transcript NM_014737                                                       |
| 0,99 | HES4                   | hes family bHLH transcription factor 4                                                                                        |
| 0,99 | CDK1                   | cyclin-dependent kinase 1                                                                                                     |
| 0,99 | RP11-35G9.5;<br>ATP8B1 | Salzman2013 ANTISENSE, coding, INTERNAL, intronic, OVERLAPTX best transcript NM_005603; novel transcript, antisense to ATP8B1 |
| 0,99 | ATP6V0E1               | ATPase, H <sup>+</sup> transporting, lysosomal 9kDa, V0 subunit e1                                                            |
| 0,99 | ZCCHC17                | zinc finger, CCHC domain containing 17                                                                                        |
| 0,99 | TSPYL1                 | TSPY-like 1                                                                                                                   |
| 0,99 | LRRC18                 | leucine rich repeat containing 18                                                                                             |

|      |               |                                                                                                                                                                                      |
|------|---------------|--------------------------------------------------------------------------------------------------------------------------------------------------------------------------------------|
| 0,99 | SMARCC1       | SWI/SNF related, matrix associated, actin dependent regulator of chromatin, subfamily c, member 1                                                                                    |
| 0,99 | TTC8          | Transcript Identified by AceView, Entrez Gene ID(s) 123016                                                                                                                           |
| 0,99 | TEKT4         | tektin 4                                                                                                                                                                             |
| 0,99 | MGST1         | microsomal glutathione S-transferase 1                                                                                                                                               |
| 0,99 | RUNDC1        | RUN domain containing 1                                                                                                                                                              |
| 0,99 | AP1G1         | adaptor-related protein complex 1, gamma 1 subunit                                                                                                                                   |
| 0,99 | WNT9B         | wingless-type MMTV integration site family, member 9B                                                                                                                                |
| 0,99 | PPP5D1        | PPP5 tetratricopeptide repeat domain containing 1                                                                                                                                    |
| 0,99 | LMBRD1        | LMBR1 domain containing 1                                                                                                                                                            |
| 0,99 | ATP6V1D       | ATPase, H <sup>+</sup> transporting, lysosomal 34kDa, V1 subunit D                                                                                                                   |
| 0,99 | SGPP2         | sphingosine-1-phosphate phosphatase 2                                                                                                                                                |
| 0,99 | DERL2         | derlin 2                                                                                                                                                                             |
| 0,99 | LIMS1         | LIM and senescent cell antigen-like domains 1                                                                                                                                        |
| 0,99 | FRMPD1        | FERM and PDZ domain containing 1                                                                                                                                                     |
| 0,99 | OR52N5        | olfactory receptor, family 52, subfamily N, member 5                                                                                                                                 |
| 0,99 | PLA2G12B      | phospholipase A2, group XIIB                                                                                                                                                         |
| 0,99 | GPR146        | G protein-coupled receptor 146                                                                                                                                                       |
| 0,99 | ZG16B         | zymogen granule protein 16B                                                                                                                                                          |
| 0,99 | OR7A5         | olfactory receptor, family 7, subfamily A, member 5                                                                                                                                  |
| 0,99 | C5orf51       | chromosome 5 open reading frame 51                                                                                                                                                   |
| 0,99 | GLB1L2        | galactosidase beta 1 like 2                                                                                                                                                          |
| 0,99 | KRT71         | keratin 71, type II                                                                                                                                                                  |
| 0,99 | SAP30BP       | SAP30 binding protein                                                                                                                                                                |
| 0,99 | CLDN5         | claudin 5                                                                                                                                                                            |
| 0,99 | TMEM14EP      | transmembrane protein 14E, pseudogene                                                                                                                                                |
| 0,99 | MET           | MET proto-oncogene, receptor tyrosine kinase                                                                                                                                         |
| 0,99 | PPM1D         | protein phosphatase, Mg <sup>2+</sup> /Mn <sup>2+</sup> dependent, 1D                                                                                                                |
| 0,99 | EFEMP2        | EGF containing fibulin-like extracellular matrix protein 2                                                                                                                           |
| 0,99 | NRL           | neural retina leucine zipper                                                                                                                                                         |
| 0,99 | XPOT          | exportin, tRNA                                                                                                                                                                       |
| 0,99 | SRSF3         | serine/arginine-rich splicing factor 3                                                                                                                                               |
| 0,99 | DPH5          | diphthamide biosynthesis 5                                                                                                                                                           |
| 0,99 | GDNF          | glial cell derived neurotrophic factor                                                                                                                                               |
| 0,99 | MTA2          | metastasis associated 1 family member 2                                                                                                                                              |
| 0,99 | CDR1; CDR1-AS | Memczak2013 ANTISENSE, CDS, coding, downstream_end, upstream_start, UTR3, UTR5 best transcript NM_004065; CDR1 antisense RNA; CDR1 antisense RNA [Source:HGNC Symbol;Acc:HGNC:48926] |
| 0,99 | GPS2          | G protein pathway suppressor 2                                                                                                                                                       |
| 0,99 | POLI          | polymerase (DNA directed) iota                                                                                                                                                       |
| 0,99 | APBA3         | amyloid beta (A4) precursor protein-binding, family A, member 3                                                                                                                      |
| 0,99 | MRFAP1L1      | Morf4 family associated protein 1-like 1                                                                                                                                             |
| 0,99 | ANGPTL2       | angiopoietin like 2                                                                                                                                                                  |

|      |               |                                                                                            |
|------|---------------|--------------------------------------------------------------------------------------------|
| 0,99 | PLA2G1B       | phospholipase A2, group IB (pancreas)                                                      |
| 0,99 | SH3TC1        | SH3 domain and tetratricopeptide repeats 1                                                 |
| 0,99 | NPR2          | natriuretic peptide receptor 2                                                             |
| 0,99 | FKBP8         | FK506 binding protein 8                                                                    |
| 0,99 | PRAMEF25      | PRAME family member 25                                                                     |
| 0,99 | MIP           | major intrinsic protein of lens fiber                                                      |
| 0,99 | BTN2A3P       | butyrophilin, subfamily 2, member A3, pseudogene                                           |
| 0,99 | BCL7B         | B-cell CLL/lymphoma 7B                                                                     |
| 0,99 | PMM2          | phosphomannomutase 2                                                                       |
| 0,99 | UQCR10        | ubiquinol-cytochrome c reductase, complex III subunit X                                    |
| 0,99 | EIF4ENIF1     | eukaryotic translation initiation factor 4E nuclear import factor 1                        |
| 0,99 | TSEN34        | TSEN34 tRNA splicing endonuclease subunit                                                  |
| 0,99 | TMEM213       | transmembrane protein 213                                                                  |
| 0,99 | TJAP1         | Zhang2013 ALT_ACCEPTOR, ALT_DONOR, coding, INTERNAL, intronic best transcript NM_001146018 |
| 0,99 | SLCO1A2       | Transcript Identified by AceView, Entrez Gene ID(s) 6579                                   |
| 0,99 | PNKD; MIR6810 | paroxysmal nonkinesigenic dyskinesia; microRNA 6810                                        |
| 0,99 | OSTM1         | osteopetrosis associated transmembrane protein 1                                           |
| 0,99 | VPS33B        | vacuolar protein sorting 33 homolog B (yeast)                                              |
| 0,99 | CXorf49B      | chromosome X open reading frame 49B                                                        |
| 0,99 | ZNF600        | zinc finger protein 600                                                                    |
| 0,99 | MINA          | MYC induced nuclear antigen                                                                |
| 0,99 | ZNF546        | zinc finger protein 546                                                                    |
| 0,99 | C9orf85       | chromosome 9 open reading frame 85                                                         |
| 0,99 | FLYWCH1       | FLYWCH-type zinc finger 1                                                                  |
| 0,99 | TAF15         | TATA box binding protein associated factor 15                                              |
| 0,99 | MIA3          | melanoma inhibitory activity family, member 3                                              |
| 0,99 | MAVS          | mitochondrial antiviral signaling protein                                                  |
| 0,99 | LARP1         | La ribonucleoprotein domain family, member 1                                               |
| 0,99 | PYDC2         | pyrin domain containing 2                                                                  |
| 0,99 | CTHRC1        | collagen triple helix repeat containing 1                                                  |
| 0,99 | STC1          | stanniocalcin 1                                                                            |
| 0,99 | SMC4          | structural maintenance of chromosomes 4                                                    |
| 0,99 | SLC16A8       | solute carrier family 16 (monocarboxylate transporter), member 8                           |
| 0,99 | CKS2          | CDC28 protein kinase regulatory subunit 2                                                  |
| 0,99 | SOX30         | SRY box 30                                                                                 |
| 0,99 | UBE2E2        | ubiquitin conjugating enzyme E2E 2                                                         |
| 0,99 | FLII          | flightless I actin binding protein                                                         |
| 0,99 | UBE2M         | ubiquitin-conjugating enzyme E2M                                                           |
| 0,99 | KIAA2022      | KIAA2022                                                                                   |
| 0,99 | EPS8L3        | EPS8-like 3                                                                                |
| 0,99 | ELL           | elongation factor RNA polymerase II                                                        |
| 0,99 | FAM150A       | family with sequence similarity 150, member A                                              |
| 0,99 | RPGR          | retinitis pigmentosa GTPase regulator                                                      |

|      |                      |                                                                                                                      |
|------|----------------------|----------------------------------------------------------------------------------------------------------------------|
| 0,99 | PERM1                | PPARGC1 and ESRR induced regulator, muscle 1                                                                         |
| 0,99 | NPHP3                | nephronophthisis 3 (adolescent)                                                                                      |
| 0,99 | THOP1                | thimet oligopeptidase 1                                                                                              |
| 0,99 | MRPL36               | mitochondrial ribosomal protein L36                                                                                  |
| 0,99 | EXD2                 | exonuclease 3-5 domain containing 2                                                                                  |
| 0,99 | TAS1R2               | taste receptor, type 1, member 2                                                                                     |
| 0,99 | PLPP4                | phospholipid phosphatase 4                                                                                           |
| 0,99 | KIAA0101;<br>CSNK1G1 | KIAA0101; casein kinase 1, gamma 1                                                                                   |
| 0,99 | SPIC                 | Spi-C transcription factor (Spi-1/PU.1 related)                                                                      |
| 0,99 | RARA                 | retinoic acid receptor, alpha                                                                                        |
| 0,99 | DCUN1D4              | DCN1, defective in cullin neddylation 1, domain containing 4                                                         |
| 0,99 | NUTF2                | nuclear transport factor 2                                                                                           |
| 0,99 | WDR93                | WD repeat domain 93                                                                                                  |
| 0,99 | THSD4                | Transcript Identified by AceView, Entrez Gene ID(s)<br>79875                                                         |
| 0,99 | ROR2                 | receptor tyrosine kinase-like orphan receptor 2                                                                      |
| 0,99 | USP48                | ubiquitin specific peptidase 48                                                                                      |
| 0,99 | C19orf43             | chromosome 19 open reading frame 43                                                                                  |
| 0,99 | BATF3                | basic leucine zipper transcription factor, ATF-like 3                                                                |
| 0,99 | HIBADH               | 3-hydroxyisobutyrate dehydrogenase                                                                                   |
| 0,99 | IGSF9B               | immunoglobulin superfamily, member 9B                                                                                |
| 0,99 | HNRNPAB              | heterogeneous nuclear ribonucleoprotein A/B                                                                          |
| 0,99 | TXNDC11              | thioredoxin domain containing 11                                                                                     |
| 0,99 | LRRC26               | leucine rich repeat containing 26                                                                                    |
| 0,99 | TPM4                 | tropomyosin 4                                                                                                        |
| 0,99 | FAM27L               | family with sequence similarity 27-like                                                                              |
| 0,99 | RESP18               | regulated endocrine-specific protein 18                                                                              |
| 0,99 | PCMT1                | protein-L-isoaspartate (D-aspartate) O-methyltransferase                                                             |
| 0,99 | NME7                 | NME/NM23 family member 7                                                                                             |
| 0,99 | CREB3L2              | cAMP responsive element binding protein 3-like 2                                                                     |
| 0,99 | sep-09               | septin 9                                                                                                             |
| 0,99 | RAD51L3-RFFL         | RAD51L3-RFFL readthrough; HCG2039718, isoform CRA_g; Uncharacterized protein<br>[Source:UniProtKB/TrEMBL;Acc:K7EN88] |
| 0,99 | EID1                 | EP300 interacting inhibitor of differentiation 1                                                                     |
| 0,99 | HINT1                | histidine triad nucleotide binding protein 1                                                                         |
| 0,99 | TMEM132A             | transmembrane protein 132A                                                                                           |
| 0,99 | PRAMEF8              | PRAME family member 8                                                                                                |
| 0,99 | ERP44                | endoplasmic reticulum protein 44                                                                                     |
| 0,99 | LMOD3                | leiomodins 3 (fetal)                                                                                                 |
| 0,99 | CSDC2                | cold shock domain containing C2, RNA binding                                                                         |
| 0,99 | MAP4K2               | mitogen-activated protein kinase kinase kinase kinase 2                                                              |
| 0,99 | SURF2                | surfeit 2 [Source:HGNC Symbol;Acc:HGNC:11475]                                                                        |
| 0,99 | HADHA                | hydroxyacyl-CoA dehydrogenase/3-ketoacyl-CoA thiolase/enoyl-CoA hydratase (trifunctional protein),<br>alpha subunit  |

|      |                                |                                                                                                          |
|------|--------------------------------|----------------------------------------------------------------------------------------------------------|
| 0,99 | PRKG1                          | protein kinase, cGMP-dependent, type I                                                                   |
| 0,99 | RRAGC                          | Ras-related GTP binding C                                                                                |
| 0,99 | FAM172A;<br>POU5F2;<br>MIR2277 | family with sequence similarity 172, member A; POU domain class 5, transcription factor 2; microRNA 2277 |
| 0,99 | BHLHE23                        | basic helix-loop-helix family, member e23                                                                |
| 0,99 | ENPEP                          | glutamyl aminopeptidase (aminopeptidase A)                                                               |
| 0,99 | CCDC151                        | coiled-coil domain containing 151                                                                        |
| 0,99 | C18orf42                       | chromosome 18 open reading frame 42                                                                      |
| 0,99 | ZNF767P                        | zinc finger family member 767, pseudogene                                                                |
| 0,99 | EEF1G; MIR3654                 | eukaryotic translation elongation factor 1 gamma; microRNA 3654                                          |
| 0,99 | IQCC                           | IQ motif containing C                                                                                    |
| 0,99 | HSD17B11                       | hydroxysteroid (17-beta) dehydrogenase 11                                                                |
| 0,99 | PRSS57                         | protease, serine, 57                                                                                     |
| 0,99 | SKP1                           | S-phase kinase-associated protein 1                                                                      |
| 0,99 | GABARAP                        | GABA(A) receptor-associated protein                                                                      |
| 0,99 | RFC1                           | replication factor C subunit 1                                                                           |
| 0,99 | BYSL                           | bystin-like                                                                                              |
| 0,99 | DNAJC25-<br>GNG10              | DNAJC25-GNG10 readthrough                                                                                |
| 0,99 | SLC15A2                        | solute carrier family 15 (oligopeptide transporter), member 2                                            |
| 0,99 | MRPS36                         | mitochondrial ribosomal protein S36                                                                      |
| 0,99 | MARCH2                         | membrane associated ring finger 2                                                                        |
| 0,99 | CANX                           | calnexin                                                                                                 |
| 0,99 | CHP2                           | calcineurin-like EF-hand protein 2                                                                       |
| 0,99 | ST3GAL5                        | ST3 beta-galactoside alpha-2,3-sialyltransferase 5                                                       |
| 0,99 | RAD51AP1                       | RAD51 associated protein 1                                                                               |
| 0,99 | CEP72                          | centrosomal protein 72kDa                                                                                |
| 0,99 | CC2D1A                         | coiled-coil and C2 domain containing 1A                                                                  |
| 0,99 | NDUFV1                         | NADH dehydrogenase (ubiquinone) flavoprotein 1, 51kDa                                                    |
| 0,99 | NFATC3                         | nuclear factor of activated T-cells, cytoplasmic, calcineurin-dependent 3                                |
| 0,99 | LHFPL2                         | lipoma HMGIC fusion partner-like 2                                                                       |
| 0,99 | OTUB1                          | OTU deubiquitinase, ubiquitin aldehyde binding 1                                                         |
| 0,99 | CHTF18                         | chromosome transmission fidelity factor 18                                                               |
| 0,99 | ZYG11A                         | zyg-11 family member A, cell cycle regulator                                                             |
| 0,99 | NEIL3                          | nei-like DNA glycosylase 3                                                                               |
| 0,99 | ZNF112                         | zinc finger protein 112                                                                                  |
| 0,99 | TAX1BP1                        | Tax1 (human T-cell leukemia virus type I) binding protein 1                                              |
| 0,99 | ATP6AP2                        | ATPase, H <sup>+</sup> transporting, lysosomal accessory protein 2                                       |
| 0,99 | GALNT14                        | polypeptide N-acetylgalactosaminyltransferase 14                                                         |
| 0,99 | NDUFB9                         | NADH dehydrogenase (ubiquinone) 1 beta subcomplex, 9, 22kDa                                              |
| 0,99 | GEMIN4                         | gem nuclear organelle associated protein 4                                                               |
| 0,99 | TBC1D4                         | TBC1 domain family, member 4                                                                             |

|      |                    |                                                                            |
|------|--------------------|----------------------------------------------------------------------------|
| 0,99 | BORCS7             | BLOC-1 related complex subunit 7                                           |
| 0,99 | PCDHB14            | protocadherin beta 14                                                      |
| 0,99 | TBCB               | tubulin folding cofactor B                                                 |
| 0,99 | HSPD1              | heat shock 60kDa protein 1 (chaperonin)                                    |
| 0,99 | TPP2               | tripeptidyl peptidase II                                                   |
| 0,99 | RP1L1              | retinitis pigmentosa 1-like 1                                              |
| 0,99 | RPP40              | ribonuclease P/MRP 40kDa subunit                                           |
| 0,99 | PPP2R3A            | protein phosphatase 2, regulatory subunit B, alpha                         |
| 0,99 | SRGN               | Transcript Identified by AceView, Entrez Gene ID(s)<br>5552                |
| 0,99 | COPS3              | COP9 signalosome subunit 3                                                 |
| 0,99 | CYP2A6             | cytochrome P450, family 2, subfamily A, polypeptide 6                      |
| 0,99 | OR5I1              | olfactory receptor, family 5, subfamily I, member 1                        |
| 0,99 | ROR1-AS1           | ROR1 antisense RNA 1                                                       |
| 0,99 | LSM14B             | LSM family member 14B                                                      |
| 0,99 | MBNL1              | muscleblind like splicing regulator 1                                      |
| 0,99 | PHF11              | PHD finger protein 11                                                      |
| 0,99 | TAP2               | transporter 2, ATP-binding cassette, sub-family B<br>(MDR/TAP)             |
| 0,99 | ST20-MTHFS         | ST20-MTHFS readthrough                                                     |
| 0,99 | TPMT               | thiopurine S-methyltransferase                                             |
| 0,99 | RBM4               | RNA binding motif protein 4                                                |
| 0,99 | KAT5               | K(lysine) acetyltransferase 5                                              |
| 0,99 | RNF170;<br>MIR4469 | ring finger protein 170; microRNA 4469                                     |
| 0,99 | CBL                | Cbl proto-oncogene, E3 ubiquitin protein ligase                            |
| 0,99 | TRMT112            | tRNA methyltransferase 11-2 homolog ( <i>S. cerevisiae</i> )               |
| 0,99 | ID4                | inhibitor of DNA binding 4, dominant negative helix-<br>loop-helix protein |
| 0,99 | MAFK               | v-maf avian musculoaponeurotic fibrosarcoma<br>oncogene homolog K          |
| 0,99 | RCN2               | reticulocalbin 2, EF-hand calcium binding domain                           |
| 0,99 | LRIT2              | leucine-rich repeat, immunoglobulin-like and<br>transmembrane domains 2    |
| 0,99 | ABCD1              | Transcript Identified by AceView, Entrez Gene ID(s)<br>215                 |
| 0,99 | SNX6               | sorting nexin 6                                                            |
| 0,99 | POLE3              | polymerase (DNA directed), epsilon 3, accessory<br>subunit                 |
| 0,99 | CDH2               | cadherin 2, type 1, N-cadherin (neuronal)                                  |
| 0,99 | TLR8               | toll-like receptor 8                                                       |
| 0,99 | LRRC56             | leucine rich repeat containing 56                                          |
| 0,99 | CYP4F8             | cytochrome P450, family 4, subfamily F, polypeptide 8                      |
| 0,99 | PLCXD1             | phosphatidylinositol-specific phospholipase C, X<br>domain containing 1    |
| 0,99 | TMEM62             | transmembrane protein 62                                                   |
| 0,99 | TRUB1              | TruB pseudouridine (psi) synthase family member 1                          |
| 0,99 | ZNF593             | zinc finger protein 593                                                    |

|      |                   |                                                                             |
|------|-------------------|-----------------------------------------------------------------------------|
| 0,99 | SRSF11            | serine/arginine-rich splicing factor 11                                     |
| 0,99 | C17orf89          | chromosome 17 open reading frame 89                                         |
| 0,99 | HNRNPA2B1         | heterogeneous nuclear ribonucleoprotein A2/B1                               |
| 0,99 | COPZ1             | coatomer protein complex subunit zeta 1                                     |
| 0,99 | DYNLT3            | dynein, light chain, Tctex-type 3                                           |
| 0,99 | IER3IP1           | immediate early response 3 interacting protein 1                            |
| 0,99 | AGMAT             | agmatinase                                                                  |
| 0,99 | TECR; MIR639      | trans-2,3-enoyl-CoA reductase; microRNA 639                                 |
| 0,99 | PSMA4             | proteasome subunit alpha 4                                                  |
| 0,99 | RPS20;<br>SNORD54 | ribosomal protein S20; small nucleolar RNA, C/D box 54                      |
| 0,99 | EID2B             | EP300 interacting inhibitor of differentiation 2B                           |
| 0,99 | ZFAND6            | zinc finger, AN1-type domain 6                                              |
| 0,99 | CRYGA             | crystallin gamma A                                                          |
| 0,99 | LRRC8A            | leucine rich repeat containing 8 family, member A                           |
| 0,99 | IFI27L2           | interferon, alpha-inducible protein 27-like 2                               |
| 0,99 | CPNE2             | copine II                                                                   |
| 0,99 | CASP12            | caspase 12 (gene/pseudogene)                                                |
| 0,99 | SPATA19           | spermatogenesis associated 19                                               |
| 0,99 | PLEKHF2           | pleckstrin homology domain containing, family F (with FYVE domain) member 2 |
| 0,99 | SPTB; MIR7855     | spectrin, beta, erythrocytic; microRNA 7855                                 |
| 0,99 | KIDINS220         | kinase D-interacting substrate 220kDa                                       |
| 0,99 | MTERF3            | mitochondrial transcription termination factor 3                            |
| 0,99 | LDLRAD3           | low density lipoprotein receptor class A domain containing 3                |
| 0,99 | THAP9-AS1         | THAP9 antisense RNA 1                                                       |
| 0,99 | TP53I11           | tumor protein p53 inducible protein 11                                      |
| 0,99 | ZNF501            | zinc finger protein 501 [Source:HGNC Symbol;Acc:HGNC:23717]                 |
| 0,99 | NUMBL             | numb homolog (Drosophila)-like                                              |
| 0,99 | ISY1              | ISY1 splicing factor homolog                                                |
| 0,99 | MRPS18B           | mitochondrial ribosomal protein S18B                                        |
| 0,99 | ZNF880            | zinc finger protein 880                                                     |
| 0,99 | CD40LG            | CD40 ligand                                                                 |
| 0,99 | CDK2AP1           | cyclin-dependent kinase 2 associated protein 1                              |
| 0,99 | SLC22A2           | solute carrier family 22 (organic cation transporter), member 2             |
| 0,99 | RTN3              | reticulon 3                                                                 |
| 0,99 | SOCS6             | suppressor of cytokine signaling 6                                          |
| 0,99 | PADI4             | peptidyl arginine deiminase, type IV                                        |
| 0,99 | SLC25A51          | solute carrier family 25, member 51                                         |
| 0,99 | ABCA8             | ATP binding cassette subfamily A member 8                                   |
| 0,99 | GSTM5             | glutathione S-transferase mu 5                                              |
| 0,99 | SFPQ              | splicing factor proline/glutamine-rich                                      |
| 0,99 | DISP2             | dispatched homolog 2 (Drosophila)                                           |
| 0,99 | SLITRK2           | SLIT and NTRK-like family, member 2                                         |
| 0,99 | UBE2Q1            | ubiquitin-conjugating enzyme E2Q family member 1                            |
| 0,99 | NADK2             | NAD kinase 2, mitochondrial                                                 |
| 0,99 | ZNF529-AS1        | ZNF529 antisense RNA 1                                                      |

|      |                        |                                                                                                                        |
|------|------------------------|------------------------------------------------------------------------------------------------------------------------|
| 0,99 | ASB1                   | ankyrin repeat and SOCS box containing 1                                                                               |
| 0,99 | BSCL2                  | Berardinelli-Seip congenital lipodystrophy 2 (seipin)                                                                  |
| 0,99 | PQLC3                  | PQ loop repeat containing 3                                                                                            |
| 0,99 | OTOP2                  | otopetrin 2                                                                                                            |
| 0,99 | TAF15                  | Transcript Identified by AceView, Entrez Gene ID(s)<br>8148                                                            |
| 0,99 | SFT2D1                 | SFT2 domain containing 1                                                                                               |
| 0,99 | ANKRD20A5P;<br>RHOT1P1 | ankyrin repeat domain 20 family, member A5,<br>pseudogene; ras homolog family member T1<br>pseudogene 1                |
| 0,99 | SEMA4C                 | sema domain, immunoglobulin domain (Ig),<br>transmembrane domain (TM) and short cytoplasmic<br>domain, (semaphorin) 4C |
| 0,99 | HP1BP3                 | heterochromatin protein 1, binding protein 3                                                                           |
| 0,99 | DENND4B                | DENN/MADD domain containing 4B                                                                                         |
| 0,99 | CTRL                   | chymotrypsin-like                                                                                                      |
| 0,99 | TRH                    | thyrotropin-releasing hormone                                                                                          |
| 0,99 | PHYHIPL                | phytanoyl-CoA 2-hydroxylase interacting protein-like                                                                   |
| 0,99 | SERBP1                 | SERPINE1 mRNA binding protein 1                                                                                        |
| 0,99 | RIPK3                  | receptor-interacting serine-threonine kinase 3                                                                         |
| 0,99 | C21orf33               | chromosome 21 open reading frame 33                                                                                    |
| 0,99 | MRAP                   | melanocortin 2 receptor accessory protein                                                                              |
| 0,99 | SKOR1                  | SKI family transcriptional corepressor 1                                                                               |
| 0,99 | CTSD                   | cathepsin D                                                                                                            |
| 0,99 | GTPBP1                 | GTP binding protein 1                                                                                                  |
| 0,99 | SQRDL                  | sulfide quinone reductase-like (yeast)                                                                                 |
| 0,99 | FAM155A                | Jeck2013 ALT_ACCEPTOR, ALT_DONOR, coding,<br>INTERNAL, intronic best transcript NM_001080396                           |
| 0,99 | OTOGL                  | otogelin-like                                                                                                          |
| 0,99 | PRR5-ARHGAP8           | PRR5-ARHGAP8 readthrough                                                                                               |
| 0,99 | CLDN7                  | claudin 7                                                                                                              |
| 0,99 | ULK1                   | unc-51 like autophagy activating kinase 1                                                                              |
| 0,99 | PPT1                   | palmitoyl-protein thioesterase 1                                                                                       |
| 0,99 | HIST1H4K               | histone cluster 1, H4k                                                                                                 |
| 0,99 | HACD2                  | 3-hydroxyacyl-CoA dehydratase 2                                                                                        |
| 0,99 | TNIP1                  | TNFAIP3 interacting protein 1                                                                                          |
| 0,99 | ACTB                   | actin, beta                                                                                                            |
| 0,99 | MRPS28                 | mitochondrial ribosomal protein S28                                                                                    |
| 0,99 | KAT6B                  | K(lysine) acetyltransferase 6B                                                                                         |
| 0,99 | TLCD1                  | TLC domain containing 1                                                                                                |
| 0,99 | RACGAP1                | Rac GTPase activating protein 1                                                                                        |
| 0,99 | HEXIM2                 | hexamethylene bis-acetamide inducible 2                                                                                |
| 0,99 | TOMM7                  | translocase of outer mitochondrial membrane 7<br>homolog (yeast)                                                       |
| 0,99 | TCEAL6                 | transcription elongation factor A (SII)-like 6                                                                         |
| 0,99 | CASP16P                | caspase 16, pseudogene                                                                                                 |
| 0,99 | COL18A1                | collagen, type XVIII, alpha 1                                                                                          |
| 0,99 | YWHAH                  | tyrosine 3-monooxygenase/tryptophan 5-<br>monooxygenase activation protein, eta                                        |
| 0,99 | EMC4                   | ER membrane protein complex subunit 4                                                                                  |

|      |           |                                                                |
|------|-----------|----------------------------------------------------------------|
| 0,99 | TOMM20    | translocase of outer mitochondrial membrane 20 homolog (yeast) |
| 0,99 | PARP1     | poly(ADP-ribose) polymerase 1                                  |
| 0,99 | TCF3      | transcription factor 3                                         |
| 0,99 | CDC5L     | cell division cycle 5-like                                     |
| 0,99 | HRNR      | hornerin                                                       |
| 0,99 | AFTPH     | aftiphilin                                                     |
| 0,99 | ZNF197    | zinc finger protein 197                                        |
| 0,99 | SLC39A14  | solute carrier family 39 (zinc transporter), member 14         |
| 0,99 | TAGLN2    | transgelin 2                                                   |
| 0,99 | SOX13     | SRY box 13                                                     |
| 0,99 | SPCS2     | signal peptidase complex subunit 2                             |
| 0,99 | SHISA6    | shisa family member 6                                          |
| 0,99 | NOS3      | Transcript Identified by AceView, Entrez Gene ID(s) 4846       |
| 0,99 | ATP7B     | ATPase, Cu <sup>++</sup> transporting, beta polypeptide        |
| 0,99 | FBXL4     | F-box and leucine-rich repeat protein 4                        |
| 0,99 | SNRNP25   | small nuclear ribonucleoprotein, U11/U12 25kDa subunit         |
| 0,99 | PRMT2     | protein arginine methyltransferase 2                           |
| 0,99 | PRMT5     | protein arginine methyltransferase 5                           |
| 0,99 | LSG1      | large 60S subunit nuclear export GTPase 1                      |
| 0,99 | MKLN1     | muskelin 1, intracellular mediator containing kelch motifs     |
| 0,99 | ERF       | Ets2 repressor factor                                          |
| 0,99 | MRPL13    | mitochondrial ribosomal protein L13                            |
| 0,99 | CD5L      | CD5 molecule-like                                              |
| 0,99 | TGM7      | transglutaminase 7                                             |
| 0,99 | CALCOCO1  | calcium binding and coiled-coil domain 1                       |
| 0,99 | KRT14     | keratin 14, type I                                             |
| 0,99 | TMPRSS11D | transmembrane protease, serine 11D                             |
| 0,99 | ZNF229    | zinc finger protein 229                                        |
| 0,99 | HHAT      | hedgehog acyltransferase                                       |
| 0,99 | RNASE6    | ribonuclease, RNase A family, k6                               |
| 0,99 | AP2M1     | adaptor-related protein complex 2, mu 1 subunit                |
| 0,99 | NPAT      | nuclear protein, ataxia-telangiectasia locus                   |
| 0,99 | TMX1      | thioredoxin-related transmembrane protein 1                    |
| 0,99 | TMEM231   | transmembrane protein 231                                      |
| 0,99 | PRAP1     | proline-rich acidic protein 1                                  |
| 0,99 | WBP4      | Transcript Identified by AceView, Entrez Gene ID(s) 11193      |
| 0,99 | NDUFAF6   | NADH dehydrogenase (ubiquinone) complex I, assembly factor 6   |
| 0,99 | BLOC1S3   | biogenesis of lysosomal organelles complex-1, subunit 3        |
| 0,99 | EPB41L4B  | erythrocyte membrane protein band 4.1 like 4B                  |
| 0,99 | DIAPH3    | diaphanous-related formin 3                                    |
| 0,99 | IFNA5     | interferon, alpha 5                                            |
| 0,99 | PCDHB10   | protocadherin beta 10                                          |
| 0,99 | TRIM65    | tripartite motif containing 65                                 |

|      |                      |                                                                                                                    |
|------|----------------------|--------------------------------------------------------------------------------------------------------------------|
| 0,99 | CDK17                | cyclin-dependent kinase 17                                                                                         |
| 0,99 | CER1                 | cerberus 1, DAN family BMP antagonist                                                                              |
| 0,99 | C11orf40             | chromosome 11 open reading frame 40                                                                                |
| 0,99 | EEF1A1               | eukaryotic translation elongation factor 1 alpha 1                                                                 |
| 0,99 | MIR205HG;<br>MIR205  | MIR205 host gene; microRNA 205                                                                                     |
| 0,99 | MYL12B               | myosin light chain 12B                                                                                             |
| 0,99 | DIS3                 | DIS3 homolog, exosome endoribonuclease and 3-5<br>exoribonuclease                                                  |
| 0,99 | ZNF131               | zinc finger protein 131                                                                                            |
| 0,99 | FAM69B               | family with sequence similarity 69, member B                                                                       |
| 0,99 | YOD1                 | YOD1 deubiquitinase                                                                                                |
| 0,99 | MBP                  | myelin basic protein                                                                                               |
| 0,99 | KRT3                 | keratin 3, type II                                                                                                 |
| 0,99 | SFXN5                | sideroflexin 5                                                                                                     |
| 0,99 | ZNF160               | zinc finger protein 160                                                                                            |
| 0,99 | ATAD3B               | ATPase family, AAA domain containing 3B                                                                            |
| 0,99 | RPL36A               | ribosomal protein L36a                                                                                             |
| 0,99 | FAM46D               | family with sequence similarity 46, member D                                                                       |
| 0,99 | SIX6                 | SIX homeobox 6                                                                                                     |
| 0,99 | ZNF287               | zinc finger protein 287                                                                                            |
| 0,99 | LRP8                 | LDL receptor related protein 8                                                                                     |
| 0,99 | PHB2;<br>SCARNA12    | prohibitin 2; small Cajal body-specific RNA 12                                                                     |
| 0,99 | TMEM59               | transmembrane protein 59                                                                                           |
| 0,99 | NCAPH2               | non-SMC condensin II complex subunit H2                                                                            |
| 0,99 | RPS13;<br>SNORD14B   | ribosomal protein S13; small nucleolar RNA, C/D box<br>14B                                                         |
| 0,99 | DSG2                 | desmoglein 2                                                                                                       |
| 0,99 | KHDRBS1              | KH domain containing, RNA binding, signal<br>transduction associated 1                                             |
| 0,99 | PLXNA1               | plexin A1                                                                                                          |
| 0,99 | ZNF587               | zinc finger protein 587                                                                                            |
| 0,99 | RANBP1               | RAN binding protein 1                                                                                              |
| 0,99 | CCDC152              | coiled-coil domain containing 152                                                                                  |
| 0,99 | GORASP1              | golgi reassembly stacking protein 1                                                                                |
| 0,99 | CYB561A3             | cytochrome b561 family, member A3                                                                                  |
| 0,99 | ACTR10               | actin-related protein 10 homolog (S. cerevisiae)                                                                   |
| 0,99 | CLEC2D               | C-type lectin domain family 2, member D                                                                            |
| 0,99 | MLX                  | MLX, MAX dimerization protein                                                                                      |
| 0,99 | METTL2A              | methyltransferase like 2A                                                                                          |
| 0,99 | C1orf158             | chromosome 1 open reading frame 158                                                                                |
| 0,99 | FBXO41               | F-box protein 41                                                                                                   |
| 0,99 | VRK3                 | vaccinia related kinase 3                                                                                          |
| 0,99 | PCP4L1               | Purkinje cell protein 4 like 1                                                                                     |
| 0,99 | PAPOLG               | Transcript Identified by AceView, Entrez Gene ID(s)<br>64895                                                       |
| 0,99 | NFATC2IP;<br>MIR4517 | nuclear factor of activated T-cells, cytoplasmic,<br>calcineurin-dependent 2 interacting protein; microRNA<br>4517 |

|      |                             |                                                                                                                                      |
|------|-----------------------------|--------------------------------------------------------------------------------------------------------------------------------------|
| 0,99 | EPHX4                       | epoxide hydrolase 4                                                                                                                  |
| 0,99 | STARD6                      | StAR-related lipid transfer domain containing 6                                                                                      |
| 0,99 | IRG1                        | immunoresponsive 1 homolog (mouse)                                                                                                   |
| 0,99 | TUBA3C                      | tubulin, alpha 3c                                                                                                                    |
| 0,99 | CYGB                        | cytoglobin                                                                                                                           |
| 0,99 | TFEC                        | transcription factor EC                                                                                                              |
| 0,99 | ZNF780B                     | zinc finger protein 780B                                                                                                             |
| 0,99 | RNF212                      | ring finger protein 212                                                                                                              |
| 0,99 | FAM32A                      | family with sequence similarity 32, member A                                                                                         |
| 0,99 | KDM2B                       | lysine (K)-specific demethylase 2B                                                                                                   |
| 0,99 | PURG                        | purine-rich element binding protein G                                                                                                |
| 0,99 | NUP62CL                     | nucleoporin 62kDa C-terminal like                                                                                                    |
| 0,99 | PRR19                       | proline rich 19                                                                                                                      |
| 0,99 | HYOU1                       | hypoxia up-regulated 1                                                                                                               |
| 0,99 | SARAF                       | store-operated calcium entry-associated regulatory factor                                                                            |
| 0,99 | SLC24A4                     | solute carrier family 24 (sodium/potassium/calcium exchanger), member 4                                                              |
| 0,99 | KCNC1                       | potassium channel, voltage gated Shaw related subfamily C, member 1                                                                  |
| 0,99 | CCDC110                     | coiled-coil domain containing 110                                                                                                    |
| 0,99 | LRRC9                       | leucine rich repeat containing 9                                                                                                     |
| 0,99 | IVNS1ABP                    | influenza virus NS1A binding protein                                                                                                 |
| 0,99 | PTCRA                       | pre T-cell antigen receptor alpha                                                                                                    |
| 0,99 | NEUROG3                     | neurogenin 3                                                                                                                         |
| 0,99 | PPM1A                       | protein phosphatase, Mg <sup>2+</sup> /Mn <sup>2+</sup> dependent, 1A                                                                |
| 0,99 | ANKRD22                     | ankyrin repeat domain 22                                                                                                             |
| 0,99 | DNAL1                       | dynein, axonemal, light chain 1                                                                                                      |
| 0,99 | SCN8A                       | Jeck2013 ANTISENSE, coding, INTERNAL, intronic best transcript NM_014191                                                             |
| 0,99 | TFAM                        | transcription factor A, mitochondrial                                                                                                |
| 0,99 | LOC100129083; CTD-2616J11.2 | uncharacterized LOC100129083; Transcript Identified by AceView, Entrez Gene ID(s) 100129083; novel transcript, antisense to SIGLEC10 |
| 0,99 | NUCB1                       | nucleobindin 1                                                                                                                       |
| 0,99 | TRMT5                       | tRNA methyltransferase 5                                                                                                             |
| 0,99 | IRX4                        | iroquois homeobox 4                                                                                                                  |
| 0,99 | OSMR                        | oncostatin M receptor                                                                                                                |
| 0,99 | TTC17                       | tetratricopeptide repeat domain 17                                                                                                   |
| 0,99 | TNFAIP8L3                   | tumor necrosis factor, alpha-induced protein 8-like 3                                                                                |
| 0,99 | CSRP1                       | cysteine and glycine-rich protein 1                                                                                                  |
| 0,99 | KCNA7                       | potassium channel, voltage gated shaker related subfamily A, member 7                                                                |
| 0,99 | RELT                        | RELT tumor necrosis factor receptor                                                                                                  |
| 0,99 | SRP68                       | signal recognition particle 68kDa                                                                                                    |
| 0,99 | TP63                        | tumor protein p63                                                                                                                    |
| 0,99 | STRAP                       | serine/threonine kinase receptor associated protein                                                                                  |
| 0,99 | FBL                         | fibrillarin                                                                                                                          |
| 0,99 | RNF224                      | ring finger protein 224                                                                                                              |
| 0,99 | PDPN                        | podoplanin                                                                                                                           |

|      |                     |                                                                                              |
|------|---------------------|----------------------------------------------------------------------------------------------|
| 0,99 | FOXN2               | forkhead box N2                                                                              |
| 0,99 | MTRNR2L6            | MT-RNR2-like 6                                                                               |
| 0,99 | C15orf38-AP3S2      | C15orf38-AP3S2 readthrough                                                                   |
| 0,99 | FSTL3               | folliculin-like 3 (secreted glycoprotein)                                                    |
| 0,99 | CAPN1               | calpain 1, (mu/I) large subunit                                                              |
| 0,99 | NDUFS3              | NADH dehydrogenase (ubiquinone) Fe-S protein 3, 30kDa (NADH-coenzyme Q reductase)            |
| 0,99 | MOGAT1              | monoacylglycerol O-acyltransferase 1                                                         |
| 0,99 | FUZ                 | fuzzy planar cell polarity protein                                                           |
| 0,99 | ADORA1              | adenosine A1 receptor                                                                        |
| 0,99 | CGGBP1              | CGG triplet repeat binding protein 1                                                         |
| 0,99 | RHOBTB2             | Rho-related BTB domain containing 2                                                          |
| 0,99 | SLC10A1             | solute carrier family 10 (sodium/bile acid cotransporter), member 1                          |
| 0,99 | NUP35               | nucleoporin 35kDa                                                                            |
| 0,99 | CPNE7               | copine VII                                                                                   |
| 0,99 | RUNX1               | runt-related transcription factor 1                                                          |
| 0,99 | SEC23B              | Sec23 homolog B, COPII coat complex component                                                |
| 0,99 | SERPINA11           | serpin peptidase inhibitor, clade A (alpha-1 antitrypsin), member 11                         |
| 0,99 | ABCA9               | ATP binding cassette subfamily A member 9                                                    |
| 0,99 | TFPI                | tissue factor pathway inhibitor (lipoprotein-associated coagulation inhibitor)               |
| 0,99 | POU4F1              | POU class 4 homeobox 1                                                                       |
| 0,99 | BDNF                | brain-derived neurotrophic factor                                                            |
| 0,99 | MICAL2              | microtubule associated monooxygenase, calponin and LIM domain containing 2                   |
| 0,99 | GLCE                | glucuronic acid epimerase                                                                    |
| 0,99 | EDNRB               | endothelin receptor type B                                                                   |
| 0,99 | SYNJ1               | synaptojanin 1                                                                               |
| 0,99 | ADII                | acireductone dioxygenase 1                                                                   |
| 0,99 | NECAP2              | NECAP endocytosis associated 2                                                               |
| 0,99 | MIIP                | Transcript Identified by AceView, Entrez Gene ID(s) 60672                                    |
| 0,99 | CRAT                | carnitine O-acetyltransferase                                                                |
| 0,99 | FAM156B;<br>FAM156A | family with sequence similarity 156, member B; family with sequence similarity 156, member A |
| 0,99 | CRYBA4              | crystallin beta A4                                                                           |
| 0,99 | FOXO4               | forkhead box O4                                                                              |
| 0,99 | SMIM7; MED26        | small integral membrane protein 7; mediator complex subunit 26                               |
| 0,99 | KDM2A               | lysine (K)-specific demethylase 2A                                                           |
| 0,99 | RPP21               | ribonuclease P/MRP 21kDa subunit                                                             |
| 0,99 | ADPRM               | ADP-ribose/CDP-alcohol diphosphatase, manganese-dependent                                    |
| 0,99 | VCPKMT              | valosin containing protein lysine (K) methyltransferase                                      |
| 0,99 | TSPAN1              | tetraspanin 1                                                                                |
| 0,99 | ARPC3               | actin related protein 2/3 complex subunit 3                                                  |
| 0,99 | RRAS                | related RAS viral (r-ras) oncogene homolog                                                   |

|      |               |                                                                                         |
|------|---------------|-----------------------------------------------------------------------------------------|
| 0,99 | SCO1          | SCO1 cytochrome c oxidase assembly protein                                              |
| 0,99 | BPIFA2        | BPI fold containing family A, member 2                                                  |
| 0,99 | PDGFA         | platelet-derived growth factor alpha polypeptide                                        |
| 0,99 | RAB10         | RAB10, member RAS oncogene family                                                       |
| 0,99 | ZNF645        | zinc finger protein 645                                                                 |
| 0,99 | FRMD8         | FERM domain containing 8                                                                |
| 0,99 | FBL           | fibrillarlin                                                                            |
| 0,99 | RHEB          | Ras homolog enriched in brain                                                           |
| 0,99 | SECISBP2L     | SECIS binding protein 2-like                                                            |
| 0,99 | sep-07        | septin 7                                                                                |
| 0,99 | PHF20L1       | PHD finger protein 20-like 1                                                            |
| 0,99 | CCDC93        | coiled-coil domain containing 93                                                        |
| 0,99 | SMIM13        | small integral membrane protein 13                                                      |
| 0,99 | ERCC6L2       | excision repair cross-complementation group 6-like 2                                    |
| 0,99 | DAPK3; MIR637 | death-associated protein kinase 3; microRNA 637                                         |
| 0,99 | PPP6R2        | protein phosphatase 6, regulatory subunit 2                                             |
| 0,99 | TCEB2         | transcription elongation factor B (SIII), polypeptide 2 (18kDa, elongin B)              |
| 0,99 | CALR          | calreticulin                                                                            |
| 0,99 | CDS1          | CDP-diacylglycerol synthase 1                                                           |
| 0,99 | KIRREL        | kin of IRRE like (Drosophila)                                                           |
| 0,99 | USP12         | ubiquitin specific peptidase 12                                                         |
| 0,99 | C21orf59      | chromosome 21 open reading frame 59                                                     |
| 0,99 | CELA3A        | chymotrypsin-like elastase family, member 3A                                            |
| 0,99 | MAG           | myelin associated glycoprotein                                                          |
| 0,99 | MRPS14        | mitochondrial ribosomal protein S14                                                     |
| 0,99 | PMS2P3        | PMS1 homolog 2, mismatch repair system component pseudogene 3                           |
| 0,99 | RPL38         | ribosomal protein L38                                                                   |
| 0,99 | CT47A1        | cancer/testis antigen family 47, member A1                                              |
| 0,99 | ZNF555        | zinc finger protein 555                                                                 |
| 0,99 | RAP2A         | RAP2A, member of RAS oncogene family                                                    |
| 0,99 | ERICH5        | glutamate rich 5                                                                        |
| 0,99 | TNFSF13       | tumor necrosis factor (ligand) superfamily, member 13                                   |
| 0,99 | HOXB9         | homeobox B9                                                                             |
| 0,99 | CNOT3         | CCR4-NOT transcription complex subunit 3                                                |
| 0,99 | DDX3Y         | DEAD (Asp-Glu-Ala-Asp) box helicase 3, Y-linked                                         |
| 0,99 | PATE1         | prostate and testis expressed 1                                                         |
| 0,99 | RAD23B        | RAD23 homolog B, nucleotide excision repair protein                                     |
| 0,99 | ZBED6CL       | ZBED6 C-terminal like                                                                   |
| 0,99 | HIF1A         | hypoxia inducible factor 1, alpha subunit (basic helix-loop-helix transcription factor) |
| 0,99 | RNF207        | ring finger protein 207                                                                 |
| 0,99 | NFKB1         | nuclear factor of kappa light polypeptide gene enhancer in B-cells 1                    |
| 0,99 | ASZ1          | ankyrin repeat, SAM and basic leucine zipper domain containing 1                        |
| 0,99 | ARNTL         | aryl hydrocarbon receptor nuclear translocator-like                                     |
| 0,99 | DHX36         | DEAH (Asp-Glu-Ala-His) box polypeptide 36                                               |

|      |                   |                                                                                                                                |
|------|-------------------|--------------------------------------------------------------------------------------------------------------------------------|
| 0,99 | SLC35D2           | solute carrier family 35 (UDP-GlcNAc/UDP-glucose transporter), member D2                                                       |
| 0,99 | SHKBP1            | SH3KBP1 binding protein 1                                                                                                      |
| 0,99 | PRSS35            | protease, serine 35                                                                                                            |
| 0,99 | PMP22             | peripheral myelin protein 22                                                                                                   |
| 0,99 | OLFM4             | olfactomedin 4                                                                                                                 |
| 0,99 | PSMB5             | proteasome subunit beta 5                                                                                                      |
| 0,99 | TBC1D24           | TBC1 domain family, member 24                                                                                                  |
| 0,99 | CCNT2-AS1         | CCNT2 antisense RNA 1                                                                                                          |
| 0,99 | OR3A4P;<br>OR3A5P | olfactory receptor, family 3, subfamily A, member 4 pseudogene; olfactory receptor, family 3, subfamily A, member 5 pseudogene |
| 0,99 | KCNB1             | potassium channel, voltage gated Shab related subfamily B, member 1                                                            |
| 0,99 | WSCD1             | WSC domain containing 1                                                                                                        |
| 0,99 | ATP1A4            | ATPase, Na <sup>+</sup> /K <sup>+</sup> transporting, alpha 4 polypeptide                                                      |
| 0,99 | RBM6              | RNA binding motif protein 6                                                                                                    |
| 0,99 | ZNF595            | zinc finger protein 595                                                                                                        |
| 0,99 | VAMP7             | vesicle associated membrane protein 7                                                                                          |
| 0,99 | C1QC              | complement component 1, q subcomponent, C chain                                                                                |
| 0,99 | RDH10-AS1         | RDH10 antisense RNA 1                                                                                                          |
| 0,99 | FSCN2             | fascin actin-bundling protein 2, retinal                                                                                       |
| 0,99 | TEK               | TEK tyrosine kinase, endothelial                                                                                               |
| 0,99 | IFT27             | intraflagellar transport 27                                                                                                    |
| 0,99 | ZBTB11            | zinc finger and BTB domain containing 11                                                                                       |
| 0,99 | IFITM10           | interferon induced transmembrane protein 10                                                                                    |
| 0,99 | MRPL3             | mitochondrial ribosomal protein L3                                                                                             |
| 0,99 | SYNGR3            | synaptogyrin 3                                                                                                                 |
| 0,99 | GUCA1C            | guanylate cyclase activator 1C                                                                                                 |
| 0,99 | FMR1NB            | fragile X mental retardation 1 neighbor                                                                                        |
| 0,99 | MPP1              | membrane protein, palmitoylated 1                                                                                              |
| 0,99 | SGPL1             | sphingosine-1-phosphate lyase 1                                                                                                |
| 0,99 | ARHGAP15          | Rho GTPase activating protein 15                                                                                               |
| 0,99 | GIT1              | G protein-coupled receptor kinase interacting ArfGAP 1                                                                         |
| 0,99 | IP6K2             | inositol hexakisphosphate kinase 2                                                                                             |
| 0,99 | OBP2B             | odorant binding protein 2B                                                                                                     |
| 0,99 | FAM89B            | family with sequence similarity 89, member B                                                                                   |
| 0,99 | DERA              | deoxyribose-phosphate aldolase (putative)                                                                                      |
| 0,99 | PROX2             | prospero homeobox 2                                                                                                            |
| 0,99 | CCNA1             | cyclin A1                                                                                                                      |
| 0,99 | PCGF6             | polycomb group ring finger 6                                                                                                   |
| 0,99 | LIPI              | lipase, member I                                                                                                               |
| 0,99 | PLEKHN1           | pleckstrin homology domain containing, family N member 1                                                                       |
| 0,99 | HES1              | hes family bHLH transcription factor 1                                                                                         |
| 0,99 | GPN1              | GPN-loop GTPase 1                                                                                                              |
| 0,99 | RNF220            | ring finger protein 220                                                                                                        |
| 0,99 | DHRS13            | dehydrogenase/reductase (SDR family) member 13                                                                                 |
| 0,99 | MYADML2           | myeloid-associated differentiation marker-like 2                                                                               |

|      |                |                                                                                  |
|------|----------------|----------------------------------------------------------------------------------|
| 0,99 | TCEANC         | transcription elongation factor A (SII) N-terminal and central domain containing |
| 0,99 | TMBIM6         | transmembrane BAX inhibitor motif containing 6                                   |
| 0,99 | SLC25A20       | solute carrier family 25 (carnitine/acylcarnitine translocase), member 20        |
| 0,99 | SPATA32        | spermatogenesis associated 32                                                    |
| 0,99 | GMPR2          | guanosine monophosphate reductase 2                                              |
| 0,99 | KRIT1          | KRIT1, ankyrin repeat containing                                                 |
| 0,99 | CASP8AP2       | caspase 8 associated protein 2                                                   |
| 0,99 | SNX19          | sorting nexin 19                                                                 |
| 0,99 | NNT            | nicotinamide nucleotide transhydrogenase                                         |
| 0,99 | PRPF4B         | pre-mRNA processing factor 4B                                                    |
| 0,99 | KIAA0100       | KIAA0100                                                                         |
| 0,99 | C11orf73       | chromosome 11 open reading frame 73                                              |
| 0,99 | OSBP2          | oxysterol binding protein 2                                                      |
| 0,99 | SULT1A1        | sulfotransferase family 1A member 1                                              |
| 0,99 | DCTD           | dCMP deaminase                                                                   |
| 0,99 | SERPINB5       | serpin peptidase inhibitor, clade B (ovalbumin), member 5                        |
| 0,99 | COX5A          | cytochrome c oxidase subunit Va                                                  |
| 0,99 | MAB21L2        | mab-21-like 2 (C. elegans)                                                       |
| 0,99 | ZC3H14         | zinc finger CCCH-type containing 14                                              |
| 0,99 | VIT            | vitrin                                                                           |
| 0,99 | STARD3         | StAR-related lipid transfer domain containing 3                                  |
| 0,99 | CCDC167        | coiled-coil domain containing 167                                                |
| 0,99 | BLOC1S5-TXNDC5 | BLOC1S5-TXNDC5 readthrough (NMD candidate)                                       |
| 0,99 | CCNF           | cyclin F                                                                         |
| 0,99 | GPR12          | G protein-coupled receptor 12                                                    |
| 0,99 | ADGRV1         | adhesion G protein-coupled receptor V1                                           |
| 0,99 | C1orf198       | chromosome 1 open reading frame 198                                              |
| 0,99 | MTM1           | myotubularin 1                                                                   |
| 0,99 | TDP1           | tyrosyl-DNA phosphodiesterase 1                                                  |
| 0,99 | NBPF7          | neuroblastoma breakpoint family, member 7                                        |
| 0,99 | C3             | complement component 3                                                           |
| 0,99 | AZI2           | 5-azacytidine induced 2                                                          |
| 0,99 | CDC25C         | cell division cycle 25C                                                          |
| 0,99 | GPATCH1        | G-patch domain containing 1                                                      |
| 0,99 | ADCY9          | adenylate cyclase 9                                                              |
| 0,99 | ZSWIM3         | zinc finger, SWIM-type containing 3                                              |
| 0,99 | GOLPH3         | golgi phosphoprotein 3 (coat-protein)                                            |
| 0,99 | FANCI          | Fanconi anemia complementation group I                                           |
| 0,99 | PAXBP1         | PAX3 and PAX7 binding protein 1                                                  |
| 0,99 | GPATCH3        | G-patch domain containing 3                                                      |
| 0,99 | CD151          | CD151 molecule (Raph blood group)                                                |
| 0,99 | SLC39A4        | solute carrier family 39 (zinc transporter), member 4                            |
| 0,99 | KRT31          | keratin 31, type I                                                               |
| 0,99 | ASCL5          | achaete-scute family bHLH transcription factor 5                                 |
| 0,99 | STIM1; MIR4687 | stromal interaction molecule 1; microRNA 4687                                    |
| 0,99 | HJURP          | Holliday junction recognition protein                                            |

|      |                                              |                                                                                                                             |
|------|----------------------------------------------|-----------------------------------------------------------------------------------------------------------------------------|
| 0,99 | NDUFA1                                       | NADH dehydrogenase (ubiquinone) 1 alpha subcomplex, 1, 7.5kDa                                                               |
| 0,99 | RPL23A;<br>SNORD4B;<br>SNORD42B;<br>SNORD42A | ribosomal protein L23a; small nucleolar RNA, C/D box 4B; small nucleolar RNA, C/D box 42B; small nucleolar RNA, C/D box 42A |
| 0,99 | LINC00961                                    | long intergenic non-protein coding RNA 961                                                                                  |
| 0,99 | MAU2                                         | MAU2 sister chromatid cohesion factor                                                                                       |
| 0,99 | MECOM                                        | MDS1 and EVI1 complex locus                                                                                                 |
| 0,99 | OR10J1                                       | olfactory receptor, family 10, subfamily J, member 1                                                                        |
| 0,99 | LAMA2                                        | laminin, alpha 2                                                                                                            |
| 0,99 | CTSV                                         | cathepsin V                                                                                                                 |
| 0,99 | SLC38A11                                     | solute carrier family 38, member 11                                                                                         |
| 0,99 | USP17L2                                      | ubiquitin specific peptidase 17-like family member 2                                                                        |
| 0,99 | FAH                                          | fumarylacetoacetate hydrolase (fumarylacetoacetase)                                                                         |
| 0,99 | EBPL                                         | emopamil binding protein-like                                                                                               |
| 0,99 | PPA2                                         | pyrophosphatase (inorganic) 2                                                                                               |
| 0,99 | PLLP                                         | plasmolipin                                                                                                                 |
| 0,99 | SPAST                                        | spastin                                                                                                                     |
| 0,99 | ARHGAP4                                      | Rho GTPase activating protein 4                                                                                             |
| 0,99 | SPINK4                                       | serine peptidase inhibitor, Kazal type 4                                                                                    |
| 0,99 | MRPS23                                       | mitochondrial ribosomal protein S23                                                                                         |
| 0,99 | FLOT1                                        | flotillin 1                                                                                                                 |
| 0,99 | MYH4                                         | myosin, heavy chain 4, skeletal muscle                                                                                      |
| 0,99 | UBA5                                         | ubiquitin-like modifier activating enzyme 5                                                                                 |
| 0,99 | UBE2H                                        | ubiquitin conjugating enzyme E2H                                                                                            |
| 0,99 | RNF157                                       | ring finger protein 157                                                                                                     |
| 0,99 | OR10P1                                       | olfactory receptor, family 10, subfamily P, member 1                                                                        |
| 0,99 | CSPG4P1Y                                     | chondroitin sulfate proteoglycan 4 pseudogene 1, Y-linked                                                                   |
| 0,99 | SEC61A2                                      | Sec61 translocon alpha 2 subunit                                                                                            |
| 0,99 | SURF2                                        | surfeit 2 [Source:HGNC Symbol;Acc:HGNC:11475]                                                                               |
| 0,99 | IBSP                                         | integrin-binding sialoprotein                                                                                               |
| 0,99 | TUBGCP4                                      | tubulin, gamma complex associated protein 4                                                                                 |
| 0,99 | PRL                                          | prolactin                                                                                                                   |
| 0,99 | VIPAS39                                      | VPS33B interacting protein, apical-basolateral polarity regulator, spe-39 homolog                                           |
| 0,99 | RAB30                                        | RAB30, member RAS oncogene family                                                                                           |
| 0,99 | ADK                                          | Memczak2013 ANTISENSE, coding, INTERNAL, intronic best transcript NM_006721                                                 |
| 0,99 | DDX1                                         | DEAD (Asp-Glu-Ala-Asp) box helicase 1                                                                                       |
| 0,99 | SLC25A38                                     | solute carrier family 25, member 38                                                                                         |
| 0,99 | ALAS1                                        | 5-aminolevulinate synthase 1                                                                                                |
| 0,99 | ZIK1                                         | zinc finger protein interacting with K protein 1                                                                            |
| 0,99 | KCTD20                                       | potassium channel tetramerization domain containing 20                                                                      |
| 0,99 | F11-AS1                                      | F11 antisense RNA 1                                                                                                         |
| 0,99 | MRPL44                                       | mitochondrial ribosomal protein L44                                                                                         |
| 0,99 | PPP1CB                                       | protein phosphatase 1, catalytic subunit, beta isozyme                                                                      |
| 0,99 | LINC00663                                    | long intergenic non-protein coding RNA 663                                                                                  |

|      |                                    |                                                                                                                                                                                                                                                                                                                            |
|------|------------------------------------|----------------------------------------------------------------------------------------------------------------------------------------------------------------------------------------------------------------------------------------------------------------------------------------------------------------------------|
| 0,99 | EIF1AD                             | eukaryotic translation initiation factor 1A domain containing                                                                                                                                                                                                                                                              |
| 0,99 | ZNF57                              | zinc finger protein 57                                                                                                                                                                                                                                                                                                     |
| 0,99 | PWWP2A                             | PWWP domain containing 2A                                                                                                                                                                                                                                                                                                  |
| 0,99 | RECQL5                             | RecQ helicase-like 5                                                                                                                                                                                                                                                                                                       |
| 0,99 | RASA1                              | RAS p21 protein activator (GTPase activating protein) 1                                                                                                                                                                                                                                                                    |
| 0,99 | FAM163B                            | family with sequence similarity 163, member B                                                                                                                                                                                                                                                                              |
| 0,99 | ATRX                               | alpha thalassemia/mental retardation syndrome X-linked                                                                                                                                                                                                                                                                     |
| 0,99 | ATP13A3                            | ATPase type 13A3                                                                                                                                                                                                                                                                                                           |
| 0,99 | CCDC42                             | coiled-coil domain containing 42                                                                                                                                                                                                                                                                                           |
| 0,99 | ASB14                              | ankyrin repeat and SOCS box containing 14                                                                                                                                                                                                                                                                                  |
| 0,99 | TRAF3IP1                           | TNF receptor-associated factor 3 interacting protein 1                                                                                                                                                                                                                                                                     |
| 0,99 | SURF6                              | surfeit 6                                                                                                                                                                                                                                                                                                                  |
| 0,99 | HYOU1                              | hypoxia up-regulated 1                                                                                                                                                                                                                                                                                                     |
| 0,99 | PTPRN2                             | protein tyrosine phosphatase, receptor type, N polypeptide 2                                                                                                                                                                                                                                                               |
| 0,99 | CA5A                               | carbonic anhydrase VA, mitochondrial                                                                                                                                                                                                                                                                                       |
| 0,99 | ME1                                | malic enzyme 1, NADP(+)-dependent, cytosolic                                                                                                                                                                                                                                                                               |
| 0,99 | BST2                               | bone marrow stromal cell antigen 2                                                                                                                                                                                                                                                                                         |
| 0,99 | TTC16                              | tetratricopeptide repeat domain 16                                                                                                                                                                                                                                                                                         |
| 0,99 | POLG                               | polymerase (DNA directed), gamma                                                                                                                                                                                                                                                                                           |
| 0,99 | METTL15                            | methyltransferase like 15                                                                                                                                                                                                                                                                                                  |
| 0,99 | HILPDA                             | hypoxia inducible lipid droplet-associated                                                                                                                                                                                                                                                                                 |
| 0,99 | TMEM67                             | transmembrane protein 67                                                                                                                                                                                                                                                                                                   |
| 0,99 | DDX28                              | DEAD (Asp-Glu-Ala-Asp) box polypeptide 28                                                                                                                                                                                                                                                                                  |
| 0,99 | IMPA2                              | inositol(myo)-1(or 4)-monophosphatase 2                                                                                                                                                                                                                                                                                    |
| 0,99 | REXO1L2P;<br>REXO1L1;<br>blarbeyby | Homo sapiens REX1, RNA exonuclease 1 homolog-like 2, pseudogene (REXO1L2P), non-coding RNA.; Synthetic construct Homo sapiens clone IMAGE:100068172, MGC:195789 REX1, RNA exonuclease 1 homolog (S. cerevisiae)-like 1 (REXO1L1) mRNA, encodes complete protein.; Transcript Identified by AceView, RefSeq ID(s) NR_003594 |
| 0,99 | STAG3L2                            | stromal antigen 3-like 2 (pseudogene)                                                                                                                                                                                                                                                                                      |
| 0,99 | ADAM28                             | ADAM metallopeptidase domain 28                                                                                                                                                                                                                                                                                            |
| 0,99 | PPP1R1B                            | protein phosphatase 1, regulatory (inhibitor) subunit 1B                                                                                                                                                                                                                                                                   |
| 0,99 | PAQR9                              | progesterin and adipoQ receptor family member IX                                                                                                                                                                                                                                                                           |
| 0,99 | BCAT1                              | branched chain amino-acid transaminase 1, cytosolic                                                                                                                                                                                                                                                                        |
| 0,99 | TCEB3                              | transcription elongation factor B (SIII), polypeptide 3 (110kDa, elongin A)                                                                                                                                                                                                                                                |
| 0,99 | ASH2L                              | ash2 (absent, small, or homeotic)-like (Drosophila)                                                                                                                                                                                                                                                                        |
| 0,99 | GTF2F1                             | general transcription factor IIF subunit 1                                                                                                                                                                                                                                                                                 |
| 0,99 | KCTD2                              | potassium channel tetramerization domain containing 2                                                                                                                                                                                                                                                                      |
| 0,99 | GPI                                | glucose-6-phosphate isomerase                                                                                                                                                                                                                                                                                              |
| 0,99 | PPP1R3G                            | protein phosphatase 1, regulatory subunit 3G                                                                                                                                                                                                                                                                               |
| 0,99 | HYAL1                              | hyaluronoglucosaminidase 1                                                                                                                                                                                                                                                                                                 |

|      |              |                                                                                             |
|------|--------------|---------------------------------------------------------------------------------------------|
| 0,99 | KRTAP10-2    | keratin associated protein 10-2                                                             |
| 0,99 | C15orf61     | chromosome 15 open reading frame 61                                                         |
| 0,99 | VPS51        | vacuolar protein sorting 51 homolog (S. cerevisiae)                                         |
| 0,99 | MYH7B        | myosin, heavy chain 7B, cardiac muscle, beta                                                |
| 0,99 | MPL          | MPL proto-oncogene, thrombopoietin receptor                                                 |
| 0,99 | ZNF283       | zinc finger protein 283                                                                     |
| 0,99 | ZFAND2B      | zinc finger, AN1-type domain 2B                                                             |
| 0,99 | RAB2A        | RAB2A, member RAS oncogene family                                                           |
| 0,99 | ARHGAP26     | Rho GTPase activating protein 26                                                            |
| 0,99 | GNG5         | guanine nucleotide binding protein (G protein), gamma 5                                     |
| 0,99 | TSHR         | thyroid stimulating hormone receptor                                                        |
| 0,99 | HMGCS2       | 3-hydroxy-3-methylglutaryl-CoA synthase 2 (mitochondrial)                                   |
| 0,99 | BCCIP        | BRCA2 and CDKN1A interacting protein                                                        |
| 0,99 | PCSK4        | proprotein convertase subtilisin/kexin type 4                                               |
| 0,99 | NXT2         | nuclear transport factor 2-like export factor 2                                             |
| 0,99 | TTPAL        | tocopherol (alpha) transfer protein-like                                                    |
| 0,99 | NISCH        | nischarin                                                                                   |
| 0,99 | GSDMA        | gasdermin A                                                                                 |
| 0,99 | LCE2A        | late cornified envelope 2A                                                                  |
| 0,99 | BZW2         | basic leucine zipper and W2 domains 2                                                       |
| 0,99 | DNHD1        | dynein heavy chain domain 1                                                                 |
| 0,99 | SKIL         | SKI-like proto-oncogene                                                                     |
| 0,99 | OGFOD1       | 2-oxoglutarate and iron-dependent oxygenase domain containing 1                             |
| 0,99 | CPOX         | coproporphyrinogen oxidase                                                                  |
| 0,99 | SLC39A10     | solute carrier family 39 (zinc transporter), member 10                                      |
| 0,99 | RABEP1       | rabaptin, RAB GTPase binding effector protein 1                                             |
| 0,99 | RAB4A; SPHAR | RAB4A, member RAS oncogene family; S-phase response (cyclin related)                        |
| 0,99 | C21orf2      | chromosome 21 open reading frame 2                                                          |
| 0,99 | ASGR1        | asialoglycoprotein receptor 1                                                               |
| 0,99 | C16orf52     | chromosome 16 open reading frame 52                                                         |
| 0,99 | CACNG1       | calcium channel, voltage-dependent, gamma subunit 1                                         |
| 0,99 | AEN          | apoptosis enhancing nuclease                                                                |
| 0,99 | WDFY3        | WD repeat and FYVE domain containing 3                                                      |
| 0,99 | GREM1        | gremlin 1, DAN family BMP antagonist [Source:HGNC Symbol;Acc:HGNC:2001]                     |
| 0,99 | DCUN1D1      | DCN1, defective in cullin neddylation 1, domain containing 1                                |
| 0,99 | OR4D6        | olfactory receptor, family 4, subfamily D, member 6                                         |
| 0,99 | MYH14        | myosin, heavy chain 14, non-muscle                                                          |
| 0,99 | SSBP2        | single-stranded DNA binding protein 2                                                       |
| 0,99 | SLC25A6      | solute carrier family 25 (mitochondrial carrier; adenine nucleotide translocator), member 6 |
| 0,99 | XRCC6        | X-ray repair complementing defective repair in Chinese hamster cells 6                      |
| 0,99 | HTR3C        | 5-hydroxytryptamine (serotonin) receptor 3C, ionotropic                                     |

|      |                                |                                                                                               |
|------|--------------------------------|-----------------------------------------------------------------------------------------------|
| 0,99 | EDDM3A                         | epididymal protein 3A                                                                         |
| 0,99 | DUSP26                         | dual specificity phosphatase 26 (putative)                                                    |
| 0,99 | COQ10B                         | coenzyme Q10B                                                                                 |
| 0,99 | BRAP                           | BRCA1 associated protein                                                                      |
| 0,99 | CT45A2                         | cancer/testis antigen family 45, member A2                                                    |
| 0,99 | PEBP4                          | phosphatidylethanolamine-binding protein 4                                                    |
| 0,99 | SHC2                           | SHC (Src homology 2 domain containing) transforming protein 2                                 |
| 0,99 | HPRT1                          | hypoxanthine phosphoribosyltransferase 1                                                      |
| 0,99 | CHEK2                          | checkpoint kinase 2                                                                           |
| 0,99 | PARP15                         | poly(ADP-ribose) polymerase family member 15                                                  |
| 0,99 | ATF4                           | activating transcription factor 4                                                             |
| 0,99 | TRAM2                          | Transcript Identified by AceView, Entrez Gene ID(s) 9697                                      |
| 0,99 | LCE2C                          | late cornified envelope 2C                                                                    |
| 0,99 | HSD17B8                        | hydroxysteroid (17-beta) dehydrogenase 8                                                      |
| 0,99 | AP1B1                          | adaptor-related protein complex 1, beta 1 subunit                                             |
| 0,99 | RPA3                           | replication protein A3                                                                        |
| 0,99 | SAXO2                          | stabilizer of axonemal microtubules 2                                                         |
| 0,99 | RPF1                           | ribosome production factor 1 homolog                                                          |
| 0,99 | FAM174B                        | family with sequence similarity 174, member B                                                 |
| 0,99 | GLRX2                          | glutaredoxin 2                                                                                |
| 0,99 | FAM220A                        | family with sequence similarity 220, member A                                                 |
| 0,99 | SMDT1                          | single-pass membrane protein with aspartate-rich tail 1                                       |
| 0,99 | ABCC3                          | ATP binding cassette subfamily C member 3                                                     |
| 0,99 | EIF3F                          | Eukaryotic translation initiation factor 3 subunit F [Source:UniProtKB/Swiss-Prot;Acc:O00303] |
| 0,99 | MRPS31                         | mitochondrial ribosomal protein S31                                                           |
| 0,99 | USP5                           | ubiquitin specific peptidase 5 (isopeptidase T)                                               |
| 0,99 | ZNF778                         | zinc finger protein 778                                                                       |
| 0,99 | LOC102724957;<br>RP11-396O20.1 | uncharacterized LOC102724957; novel transcript                                                |
| 0,99 | UPF2                           | UPF2 regulator of nonsense transcripts homolog (yeast)                                        |
| 0,99 | IRX5                           | iroquois homeobox 5                                                                           |
| 0,99 | RPS6KA4                        | ribosomal protein S6 kinase, 90kDa, polypeptide 4                                             |
| 0,99 | MRPS26                         | mitochondrial ribosomal protein S26                                                           |
| 0,99 | VPS72                          | vacuolar protein sorting 72 homolog (S. cerevisiae)                                           |
| 0,99 | OR10H2                         | olfactory receptor, family 10, subfamily H, member 2                                          |
| 0,99 | QRSL1                          | glutaminyl-tRNA synthase (glutamine-hydrolyzing)-like 1                                       |
| 0,99 | RNF185                         | Transcript Identified by AceView, Entrez Gene ID(s) 91445                                     |
| 0,99 | MRPL43                         | mitochondrial ribosomal protein L43                                                           |
| 0,99 | PTGES3                         | prostaglandin E synthase 3 (cytosolic)                                                        |
| 0,99 | SESN2                          | sestrin 2                                                                                     |
| 0,99 | C1GALT1C1L                     | C1GALT1-specific chaperone 1 like                                                             |
| 0,99 | CDADC1                         | cytidine and dCMP deaminase domain containing 1                                               |

|      |                    |                                                                                                                                                                                                                                                                                                                                                        |
|------|--------------------|--------------------------------------------------------------------------------------------------------------------------------------------------------------------------------------------------------------------------------------------------------------------------------------------------------------------------------------------------------|
| 0,99 | GTF2H2;<br>GTF2H2B | general transcription factor IIH subunit 2; general transcription factor IIH subunit 2B (pseudogene)                                                                                                                                                                                                                                                   |
| 0,99 | ZNF587B            | zinc finger protein 587B                                                                                                                                                                                                                                                                                                                               |
| 0,99 | EFCAB11            | EF-hand calcium binding domain 11                                                                                                                                                                                                                                                                                                                      |
| 0,99 | ZNF410             | zinc finger protein 410                                                                                                                                                                                                                                                                                                                                |
| 0,98 | STK32A             | serine/threonine kinase 32A                                                                                                                                                                                                                                                                                                                            |
| 0,98 | AKR1B10            | aldo-keto reductase family 1, member B10 (aldose reductase)                                                                                                                                                                                                                                                                                            |
| 0,98 | ATIC               | 5-aminoimidazole-4-carboxamide ribonucleotide formyltransferase/IMP cyclohydrolase                                                                                                                                                                                                                                                                     |
| 0,98 | ABCC1              | Jeck2013 ALT_ACCEPTOR, ALT_DONOR, coding, INTERNAL, intronic best transcript NM_004996                                                                                                                                                                                                                                                                 |
| 0,98 | UBTD2              | ubiquitin domain containing 2                                                                                                                                                                                                                                                                                                                          |
| 0,98 | TTC34              | tetratricopeptide repeat domain 34                                                                                                                                                                                                                                                                                                                     |
| 0,98 | MAPK8IP2           | mitogen-activated protein kinase 8 interacting protein 2                                                                                                                                                                                                                                                                                               |
| 0,98 | OR8J3              | olfactory receptor, family 8, subfamily J, member 3                                                                                                                                                                                                                                                                                                    |
| 0,98 | BMP1               | bone morphogenetic protein 1                                                                                                                                                                                                                                                                                                                           |
| 0,98 | SRGAP3             | SLIT-ROBO Rho GTPase activating protein 3                                                                                                                                                                                                                                                                                                              |
| 0,98 | FST                | follicle-stimulating hormone receptor                                                                                                                                                                                                                                                                                                                  |
| 0,98 | TAP1               | transporter 1, ATP-binding cassette, sub-family B (MDR/TAP)                                                                                                                                                                                                                                                                                            |
| 0,98 | FDX1L              | ferredoxin 1-like                                                                                                                                                                                                                                                                                                                                      |
| 0,98 | EIF4EBP1           | eukaryotic translation initiation factor 4E binding protein 1                                                                                                                                                                                                                                                                                          |
| 0,98 | FBL                | fibrillarin                                                                                                                                                                                                                                                                                                                                            |
| 0,98 | DNAH6              | dynein, axonemal, heavy chain 6                                                                                                                                                                                                                                                                                                                        |
| 0,98 | LGALS9             | lectin, galactoside-binding, soluble, 9                                                                                                                                                                                                                                                                                                                |
| 0,98 | YIPF3              | Yip1 domain family member 3                                                                                                                                                                                                                                                                                                                            |
| 0,98 | ARL6IP4            | ADP-ribosylation factor like GTPase 6 interacting protein 4                                                                                                                                                                                                                                                                                            |
| 0,98 | MGAT4D             | MGAT4 family, member D                                                                                                                                                                                                                                                                                                                                 |
| 0,98 | KIRREL2            | kin of IRRE like 2 (Drosophila)                                                                                                                                                                                                                                                                                                                        |
| 0,98 | MASP1              | mannan-binding lectin serine peptidase 1 (C4/C2 activating component of Ra-reactive factor)                                                                                                                                                                                                                                                            |
| 0,98 | RNF2               | ring finger protein 2                                                                                                                                                                                                                                                                                                                                  |
| 0,98 | MLLT3              | Jeck2013 ALT_ACCEPTOR, ALT_DONOR, coding, INTERNAL, intronic best transcript NM_004529                                                                                                                                                                                                                                                                 |
| 0,98 | TMEM75             | transmembrane protein 75                                                                                                                                                                                                                                                                                                                               |
| 0,98 | NEK9               | NIMA-related kinase 9                                                                                                                                                                                                                                                                                                                                  |
| 0,98 | SELO               | selenoprotein O; selenoprotein O<br>[Source:EntrezGene;Acc:83642]; Salzman2013 ANNOTATED, CDS, coding, INTERNAL, OVCODE, OVERLAPTX, OVEXON best transcript NM_031454; Salzman2013 ANNOTATED, CDS, coding, OVCODE, OVERLAPTX, OVEXON, UTR3 best transcript NM_031454; Transcript Identified by AceView, Entrez Gene ID(s) 83642, RefSeq ID(s) NM_031454 |
| 0,98 | ZNF652             | zinc finger protein 652                                                                                                                                                                                                                                                                                                                                |
| 0,98 | ZNF394             | zinc finger protein 394                                                                                                                                                                                                                                                                                                                                |

|      |           |                                                                                                           |
|------|-----------|-----------------------------------------------------------------------------------------------------------|
| 0,98 | FAM104A   | family with sequence similarity 104, member A                                                             |
| 0,98 | KCNH7     | potassium channel, voltage gated eag related subfamily H, member 7                                        |
| 0,98 | TMEM132C  | transmembrane protein 132C                                                                                |
| 0,98 | TPST1     | tyrosylprotein sulfotransferase 1                                                                         |
| 0,98 | MAS1L     | MAS1 proto-oncogene like, G protein-coupled receptor                                                      |
| 0,98 | FCGBP     | Fc fragment of IgG binding protein                                                                        |
| 0,98 | GCKR      | glucokinase (hexokinase 4) regulator                                                                      |
| 0,98 | CA10      | carbonic anhydrase X                                                                                      |
| 0,98 | LINC00935 | long intergenic non-protein coding RNA 935                                                                |
| 0,98 | NPIPA5    | nuclear pore complex interacting protein family, member A5                                                |
| 0,98 | IGFN1     | immunoglobulin-like and fibronectin type III domain containing 1                                          |
| 0,98 | MMP16     | matrix metalloproteinase 16 (membrane-inserted)                                                           |
| 0,98 | PPFIA4    | protein tyrosine phosphatase, receptor type, f polypeptide (PTPRF), interacting protein (liprin), alpha 4 |
| 0,98 | COPA      | coatamer protein complex subunit alpha                                                                    |
| 0,98 | UQCC1     | ubiquinol-cytochrome c reductase complex assembly factor 1                                                |
| 0,98 | C18orf54  | chromosome 18 open reading frame 54                                                                       |
| 0,98 | COG3      | component of oligomeric golgi complex 3                                                                   |
| 0,98 | CCDC130   | coiled-coil domain containing 130                                                                         |
| 0,98 | ZNF674    | zinc finger protein 674                                                                                   |
| 0,98 | VNN1      | vanin 1                                                                                                   |
| 0,98 | SMIM22    | small integral membrane protein 22                                                                        |
| 0,98 | STAT5B    | signal transducer and activator of transcription 5B                                                       |
| 0,98 | TAAR1     | trace amine associated receptor 1                                                                         |
| 0,98 | GREB1     | growth regulation by estrogen in breast cancer 1                                                          |
| 0,98 | TRAPPC6B  | trafficking protein particle complex 6B                                                                   |
| 0,98 | UFC1      | ubiquitin-fold modifier conjugating enzyme 1                                                              |
| 0,98 | ZDHHC3    | zinc finger, DHHC-type containing 3                                                                       |
| 0,98 | HIST1H2AG | histone cluster 1, H2ag                                                                                   |
| 0,98 | UQCRQ     | ubiquinol-cytochrome c reductase complex III subunit VII                                                  |
| 0,98 | FHOD3     | formin homology 2 domain containing 3                                                                     |
| 0,98 | SLC30A2   | solute carrier family 30 (zinc transporter), member 2                                                     |
| 0,98 | LCE2B     | late cornified envelope 2B                                                                                |
| 0,98 | XAB2      | XPA binding protein 2                                                                                     |
| 0,98 | SDF2L1    | stromal cell-derived factor 2-like 1                                                                      |
| 0,98 | ZCCHC9    | zinc finger, CCHC domain containing 9                                                                     |
| 0,98 | USP37     | ubiquitin specific peptidase 37                                                                           |
| 0,98 | CRISPLD1  | cysteine-rich secretory protein LCCL domain containing 1                                                  |
| 0,98 | CBARP     | calcium channel, voltage-dependent, beta subunit associated regulatory protein                            |
| 0,98 | SNRPD2    | small nuclear ribonucleoprotein D2 polypeptide                                                            |
| 0,98 | LAPTM4A   | lysosomal protein transmembrane 4 alpha                                                                   |

|      |                                 |                                                                                                                                                 |
|------|---------------------------------|-------------------------------------------------------------------------------------------------------------------------------------------------|
| 0,98 | FBXW8                           | F-box and WD repeat domain containing 8                                                                                                         |
| 0,98 | ACKR2                           | atypical chemokine receptor 2                                                                                                                   |
| 0,98 | ITGA4                           | integrin alpha 4                                                                                                                                |
| 0,98 | BCL2L14                         | BCL2-like 14 (apoptosis facilitator)                                                                                                            |
| 0,98 | ARIH1; MIR630                   | ariadne RBR E3 ubiquitin protein ligase 1; microRNA 630                                                                                         |
| 0,98 | RASGRP1                         | RAS guanyl releasing protein 1 (calcium and DAG-regulated)                                                                                      |
| 0,98 | ATP2B1                          | ATPase, Ca++ transporting, plasma membrane 1                                                                                                    |
| 0,98 | FAM214A                         | family with sequence similarity 214, member A                                                                                                   |
| 0,98 | ATP5J2                          | ATP synthase, H+ transporting, mitochondrial Fo complex subunit F2                                                                              |
| 0,98 | MSS51                           | MSS51 mitochondrial translational activator                                                                                                     |
| 0,98 | HENMT1                          | HEN1 methyltransferase homolog 1 (Arabidopsis)                                                                                                  |
| 0,98 | CCDC154                         | coiled-coil domain containing 154                                                                                                               |
| 0,98 | TSPAN3                          | tetraspanin 3                                                                                                                                   |
| 0,98 | FGG                             | fibrinogen gamma chain                                                                                                                          |
| 0,98 | MORN5                           | MORN repeat containing 5                                                                                                                        |
| 0,98 | OR4N5                           | olfactory receptor, family 4, subfamily N, member 5                                                                                             |
| 0,98 | CORO1A                          | coronin, actin binding protein, 1A                                                                                                              |
| 0,98 | KNOP1                           | lysine-rich nucleolar protein 1                                                                                                                 |
| 0,98 | MCOLN1                          | mucolipin 1                                                                                                                                     |
| 0,98 | CLEC18B                         | C-type lectin domain family 18, member B                                                                                                        |
| 0,98 | STAP2                           | signal transducing adaptor family member 2                                                                                                      |
| 0,98 | SLC8A1                          | solute carrier family 8 (sodium/calcium exchanger), member 1                                                                                    |
| 0,98 | GZMB                            | granzyme B                                                                                                                                      |
| 0,98 | SYT2                            | synaptotagmin II                                                                                                                                |
| 0,98 | PSMA2                           | proteasome subunit alpha 2                                                                                                                      |
| 0,98 | CD46                            | CD46 molecule, complement regulatory protein                                                                                                    |
| 0,98 | STEAP3                          | STEAP family member 3, metalloredutase                                                                                                          |
| 0,98 | TRAPPC4                         | trafficking protein particle complex 4                                                                                                          |
| 0,98 | PEAK1                           | pseudopodium-enriched atypical kinase 1                                                                                                         |
| 0,98 | MCM5                            | minichromosome maintenance complex component 5                                                                                                  |
| 0,98 | IQCJ; SCHIP1; IQCJ-SCHIP1       | IQ motif containing J; schwannomin interacting protein 1; IQCJ-SCHIP1 readthrough                                                               |
| 0,98 | RCC1; SNORA73A; SNHG3; SNORA73B | regulator of chromosome condensation 1; small nucleolar RNA, H/ACA box 73A; small nucleolar RNA host gene 3; small nucleolar RNA, H/ACA box 73B |
| 0,98 | ZNF780B                         | zinc finger protein 780B                                                                                                                        |
| 0,98 | GPR65                           | G protein-coupled receptor 65                                                                                                                   |
| 0,98 | PINK1; MIR6084                  | PTEN induced putative kinase 1; microRNA 6084                                                                                                   |
| 0,98 | SNRPE                           | small nuclear ribonucleoprotein polypeptide E                                                                                                   |
| 0,98 | PIK3C3                          | phosphatidylinositol 3-kinase, catalytic subunit type 3                                                                                         |
| 0,98 | ANP32A                          | acidic nuclear phosphoprotein 32 family member A                                                                                                |
| 0,98 | LINC00982                       | long intergenic non-protein coding RNA 982                                                                                                      |
| 0,98 | SLC25A26                        | solute carrier family 25 (S-adenosylmethionine carrier), member 26                                                                              |
| 0,98 | ACO1                            | aconitase 1, soluble                                                                                                                            |

|      |                                   |                                                                                                      |
|------|-----------------------------------|------------------------------------------------------------------------------------------------------|
| 0,98 | TLE4                              | transducin-like enhancer of split 4                                                                  |
| 0,98 | IL20                              | interleukin 20                                                                                       |
| 0,98 | USP3                              | ubiquitin specific peptidase 3                                                                       |
| 0,98 | HK1                               | hexokinase 1                                                                                         |
| 0,98 | NKX2-5                            | NK2 homeobox 5                                                                                       |
| 0,98 | APOBEC3A                          | apolipoprotein B mRNA editing enzyme, catalytic polypeptide-like 3A                                  |
| 0,98 | CTBP1                             | C-terminal binding protein 1                                                                         |
| 0,98 | RPS25                             | ribosomal protein S25                                                                                |
| 0,98 | LCLAT1                            | lysocardiolipin acyltransferase 1                                                                    |
| 0,98 | RAB35                             | RAB35, member RAS oncogene family                                                                    |
| 0,98 | PRSS46                            | protease, serine 46                                                                                  |
| 0,98 | ZNF217                            | zinc finger protein 217                                                                              |
| 0,98 | ARL8B                             | ADP-ribosylation factor like GTPase 8B                                                               |
| 0,98 | NR1H2                             | nuclear receptor subfamily 1, group H, member 2                                                      |
| 0,98 | RASL10B                           | RAS-like, family 10, member B                                                                        |
| 0,98 | TSPYL2                            | TSPY-like 2                                                                                          |
| 0,98 | ACVR1B                            | activin A receptor type IB                                                                           |
| 0,98 | ZNF420                            | zinc finger protein 420                                                                              |
| 0,98 | AKIRIN2                           | akirin 2                                                                                             |
| 0,98 | PSMG2                             | proteasome (prosome, macropain) assembly chaperone 2                                                 |
| 0,98 | EDRF1                             | erythroid differentiation regulatory factor 1                                                        |
| 0,98 | GPR61                             | G protein-coupled receptor 61                                                                        |
| 0,98 | SPRR2D                            | small proline-rich protein 2D                                                                        |
| 0,98 | CELSR2                            | cadherin, EGF LAG seven-pass G-type receptor 2                                                       |
| 0,98 | FNTB                              | farnesyltransferase, CAAX box, beta                                                                  |
| 0,98 | DEFB103A;<br>DEFB103B             | defensin, beta 103A; defensin, beta 103B                                                             |
| 0,98 | RRP8                              | ribosomal RNA processing 8, methyltransferase, homolog (yeast)                                       |
| 0,98 | SIRPB2                            | signal-regulatory protein beta 2                                                                     |
| 0,98 | LUZP6; MTPN                       | leucine zipper protein 6; myotrophin                                                                 |
| 0,98 | HIST1H1E                          | histone cluster 1, H1e                                                                               |
| 0,98 | DNAL4                             | dynein, axonemal, light chain 4                                                                      |
| 0,98 | CD300LG                           | CD300 molecule-like family member g                                                                  |
| 0,98 | B2M                               | beta-2-microglobulin                                                                                 |
| 0,98 | UBAP2;<br>SNORD121A;<br>SNORD121B | ubiquitin associated protein 2; small nucleolar RNA, C/D box 121A; small nucleolar RNA, C/D box 121B |
| 0,98 | STRA6                             | stimulated by retinoic acid 6                                                                        |
| 0,98 | ST3GAL2                           | ST3 beta-galactoside alpha-2,3-sialyltransferase 2                                                   |
| 0,98 | ZNF585A                           | zinc finger protein 585A                                                                             |
| 0,98 | TSSC4                             | tumor suppressing subtransferable candidate 4                                                        |
| 0,98 | ID1                               | inhibitor of DNA binding 1, dominant negative helix-loop-helix protein                               |
| 0,98 | PITPNA                            | phosphatidylinositol transfer protein, alpha                                                         |
| 0,98 | ZBTB7B                            | zinc finger and BTB domain containing 7B                                                             |
| 0,98 | NXPH4                             | neurexophilin 4                                                                                      |

|      |                             |                                                                                                   |
|------|-----------------------------|---------------------------------------------------------------------------------------------------|
| 0,98 | SYDE1                       | synapse defective 1, Rho GTPase, homolog 1 (C. elegans)                                           |
| 0,98 | SYF2                        | SYF2 pre-mRNA-splicing factor                                                                     |
| 0,98 | NHLRC3                      | NHL repeat containing 3                                                                           |
| 0,98 | ARVCF                       | armadillo repeat gene deleted in velocardiofacial syndrome                                        |
| 0,98 | RANBP3L                     | RAN binding protein 3-like                                                                        |
| 0,98 | EIF3I                       | eukaryotic translation initiation factor 3, subunit I                                             |
| 0,98 | ZC3H8                       | zinc finger CCCH-type containing 8                                                                |
| 0,98 | YPEL3                       | yippee like 3                                                                                     |
| 0,98 | DLC1                        | DLC1 Rho GTPase activating protein                                                                |
| 0,98 | NT5C3B                      | 5-nucleotidase, cytosolic IIIB                                                                    |
| 0,98 | SLC16A13                    | solute carrier family 16, member 13                                                               |
| 0,98 | GALNTL6                     | Salzman2013 ANTISENSE, coding, INTERNAL, intronic best transcript NM_001034845                    |
| 0,98 | FDPS                        | farnesyl diphosphate synthase                                                                     |
| 0,98 | TCF15                       | transcription factor 15 (basic helix-loop-helix)                                                  |
| 0,98 | TIPIN; RPL9P25              | TIMELESS interacting protein; ribosomal protein L9 pseudogene 25                                  |
| 0,98 | ATHL1                       | ATH1, acid trehalase-like 1 (yeast)                                                               |
| 0,98 | GBAS                        | glioblastoma amplified sequence                                                                   |
| 0,98 | LAMA4                       | laminin, alpha 4                                                                                  |
| 0,98 | POU6F1                      | POU class 6 homeobox 1                                                                            |
| 0,98 | PTPRC                       | protein tyrosine phosphatase, receptor type, C                                                    |
| 0,98 | EFCC1                       | EF-hand and coiled-coil domain containing 1                                                       |
| 0,98 | NUS1                        | NUS1 dehydrolipichyl diphosphate synthase subunit                                                 |
| 0,98 | ATP5EP2                     | ATP synthase, H <sup>+</sup> transporting, mitochondrial F1 complex, epsilon subunit pseudogene 2 |
| 0,98 | MICALL1                     | MICAL-like 1                                                                                      |
| 0,98 | BAIAP2                      | BAI1-associated protein 2                                                                         |
| 0,98 | FAM72D                      | family with sequence similarity 72, member D                                                      |
| 0,98 | CCR3                        | chemokine (C-C motif) receptor 3                                                                  |
| 0,98 | MIS18BP1                    | MIS18 binding protein 1                                                                           |
| 0,98 | ZC3H13                      | zinc finger CCCH-type containing 13                                                               |
| 0,98 | FAM213B                     | family with sequence similarity 213, member B                                                     |
| 0,98 | ATP6V1G3                    | ATPase, H <sup>+</sup> transporting, lysosomal 13kDa, V1 subunit G3                               |
| 0,98 | RYR1                        | ryanodine receptor 1 (skeletal)                                                                   |
| 0,98 | LOC100130705; RP11-309L24.4 | uncharacterized LOC100130705; putative novel transcript                                           |
| 0,98 | ST3GAL4                     | ST3 beta-galactoside alpha-2,3-sialyltransferase 4                                                |
| 0,98 | PML                         | promyelocytic leukemia                                                                            |
| 0,98 | HS1BP3                      | HCLS1 binding protein 3                                                                           |
| 0,98 | PCGF3                       | polycomb group ring finger 3                                                                      |
| 0,98 | ZCCHC2                      | zinc finger, CCHC domain containing 2                                                             |
| 0,98 | CSNK1E                      | casein kinase 1, epsilon                                                                          |
| 0,98 | PDE6D                       | phosphodiesterase 6D, cGMP-specific, rod, delta                                                   |
| 0,98 | TCTN2                       | tectonic family member 2                                                                          |

|      |                              |                                                                               |
|------|------------------------------|-------------------------------------------------------------------------------|
| 0,98 | MATR3;<br>SNORA74A;<br>SNHG4 | matrin 3; small nucleolar RNA, H/ACA box 74A; small nucleolar RNA host gene 4 |
| 0,98 | RPL22L1                      | ribosomal protein L22-like 1                                                  |
| 0,98 | KLHDC2                       | kelch domain containing 2                                                     |
| 0,98 | LMNB2;<br>MIR7108            | lamin B2; microRNA 7108                                                       |
| 0,98 | C2orf47                      | chromosome 2 open reading frame 47                                            |
| 0,98 | C18orf63                     | chromosome 18 open reading frame 63                                           |
| 0,98 | CALML6                       | calmodulin-like 6                                                             |
| 0,98 | SNPH                         | syntaphilin                                                                   |
| 0,98 | TEX13B                       | testis expressed 13B                                                          |
| 0,98 | EGFR                         | epidermal growth factor receptor                                              |
| 0,98 | SLCO1A2                      | solute carrier organic anion transporter family, member 1A2                   |
| 0,98 | TRDN                         | triadin                                                                       |
| 0,98 | CCDC38                       | coiled-coil domain containing 38                                              |
| 0,98 | CRACR2B                      | calcium release activated channel regulator 2B                                |
| 0,98 | KANSL1L                      | KAT8 regulatory NSL complex subunit 1 like                                    |
| 0,98 | GZF1                         | GDNF-inducible zinc finger protein 1                                          |
| 0,98 | NR2C2                        | nuclear receptor subfamily 2, group C, member 2                               |
| 0,98 | OR1F1                        | olfactory receptor, family 1, subfamily F, member 1                           |
| 0,98 | NEGR1                        | neuronal growth regulator 1                                                   |
| 0,98 | ERAP1                        | endoplasmic reticulum aminopeptidase 1                                        |
| 0,98 | KRTAP10-7;<br>KRTAP10-8      | keratin associated protein 10-7; keratin associated protein 10-8              |
| 0,98 | SNRPD2P2                     | small nuclear ribonucleoprotein D2 pseudogene 2                               |
| 0,98 | IL34                         | interleukin 34                                                                |
| 0,98 | PHYHIP                       | phytanoyl-CoA 2-hydroxylase interacting protein                               |
| 0,98 | KIF21A                       | kinesin family member 21A                                                     |
| 0,98 | TRIM54                       | tripartite motif containing 54                                                |
| 0,98 | ADAM17                       | ADAM metallopeptidase domain 17                                               |
| 0,98 | KHDC1L                       | KH homology domain containing 1-like                                          |
| 0,98 | DOLPP1                       | dolichydiphosphatase 1                                                        |
| 0,98 | PSMD2                        | proteasome 26S subunit, non-ATPase 2                                          |
| 0,98 | SAV1                         | salvador family WW domain containing protein 1                                |
| 0,98 | MSX2                         | msh homeobox 2                                                                |
| 0,98 | TFIP11                       | tuftelin interacting protein 11                                               |
| 0,98 | DMWD                         | dystrophia myotonica, WD repeat containing                                    |
| 0,98 | TMEM199;<br>MIR4723          | transmembrane protein 199; microRNA 4723                                      |
| 0,98 | UBA52                        | ubiquitin A-52 residue ribosomal protein fusion product 1                     |
| 0,98 | UFD1L                        | ubiquitin fusion degradation 1 like (yeast)                                   |
| 0,98 | MST1L                        | macrophage stimulating 1-like                                                 |
| 0,98 | RBM8A                        | RNA binding motif protein 8A                                                  |
| 0,98 | PINLYP                       | phospholipase A2 inhibitor and LY6/PLAUR domain containing                    |
| 0,98 | RUNX1T1                      | runt-related transcription factor 1; translocated to, 1 (cyclin D-related)    |

|      |                                                         |                                                                                                                                                                      |
|------|---------------------------------------------------------|----------------------------------------------------------------------------------------------------------------------------------------------------------------------|
| 0,98 | ASB3                                                    | ankyrin repeat and SOCS box containing 3                                                                                                                             |
| 0,98 | ASB13                                                   | ankyrin repeat and SOCS box containing 13                                                                                                                            |
| 0,98 | KPNA3                                                   | Transcript Identified by AceView, Entrez Gene ID(s)<br>3839                                                                                                          |
| 0,98 | AVPR1A                                                  | arginine vasopressin receptor 1A                                                                                                                                     |
| 0,98 | GLMP                                                    | glycosylated lysosomal membrane protein                                                                                                                              |
| 0,98 | CNNM4                                                   | cyclin and CBS domain divalent metal cation transport<br>mediator 4                                                                                                  |
| 0,98 | ASPHD1                                                  | aspartate beta-hydroxylase domain containing 1                                                                                                                       |
| 0,98 | FGF23                                                   | fibroblast growth factor 23                                                                                                                                          |
| 0,98 | MPRIP                                                   | myosin phosphatase Rho interacting protein                                                                                                                           |
| 0,98 | DIEXF                                                   | digestive organ expansion factor homolog (zebrafish)                                                                                                                 |
| 0,98 | LPAL2                                                   | lipoprotein, Lp(a)-like 2, pseudogene                                                                                                                                |
| 0,98 | CDH26                                                   | cadherin 26                                                                                                                                                          |
| 0,98 | CCDC7                                                   | coiled-coil domain containing 7                                                                                                                                      |
| 0,98 | UPB1                                                    | ureidopropionase, beta                                                                                                                                               |
| 0,98 | CCDC106                                                 | coiled-coil domain containing 106                                                                                                                                    |
| 0,98 | SLFN12                                                  | schlafen family member 12                                                                                                                                            |
| 0,98 | RLF                                                     | rearranged L-myc fusion                                                                                                                                              |
| 0,98 | PABPC1L2B                                               | poly(A) binding protein, cytoplasmic 1-like 2B                                                                                                                       |
| 0,98 | CHPF                                                    | chondroitin polymerizing factor                                                                                                                                      |
| 0,98 | FIS1                                                    | fission, mitochondrial 1                                                                                                                                             |
| 0,98 | GCSAM                                                   | germinal center-associated, signaling and motility                                                                                                                   |
| 0,98 | SST                                                     | somatostatin                                                                                                                                                         |
| 0,98 | NRP1                                                    | neuropilin 1                                                                                                                                                         |
| 0,98 | ZBTB44                                                  | zinc finger and BTB domain containing 44                                                                                                                             |
| 0,98 | ZNF606                                                  | zinc finger protein 606                                                                                                                                              |
| 0,98 | EEF1D                                                   | eukaryotic translation elongation factor 1 delta<br>(guanine nucleotide exchange protein)                                                                            |
| 0,98 | TFB2M                                                   | transcription factor B2, mitochondrial                                                                                                                               |
| 0,98 | CRYGS                                                   | crystallin gamma S                                                                                                                                                   |
| 0,98 | A3GALT2                                                 | alpha 1,3-galactosyltransferase 2                                                                                                                                    |
| 0,98 | LSM10                                                   | LSM10, U7 small nuclear RNA associated                                                                                                                               |
| 0,98 | ORAOV1                                                  | oral cancer overexpressed 1                                                                                                                                          |
| 0,98 | CNKSR1                                                  | connector enhancer of kinase suppressor of Ras 1                                                                                                                     |
| 0,98 | SURF4                                                   | surfeit 4                                                                                                                                                            |
| 0,98 | RSL24D1                                                 | ribosomal L24 domain containing 1                                                                                                                                    |
| 0,98 | TRO                                                     | trophinin                                                                                                                                                            |
| 0,98 | PUS7L                                                   | pseudouridylate synthase 7-like                                                                                                                                      |
| 0,98 | ZNF558                                                  | zinc finger protein 558                                                                                                                                              |
| 0,98 | RPL4;<br>SNORD16;<br>SNORD18A;<br>SNORD18B;<br>SNORD18C | ribosomal protein L4; small nucleolar RNA, C/D box<br>16; small nucleolar RNA, C/D box 18A; small<br>nucleolar RNA, C/D box 18B; small nucleolar RNA,<br>C/D box 18C |
| 0,98 | RARRES1                                                 | retinoic acid receptor responder (tazarotene induced) 1                                                                                                              |
| 0,98 | NHLRC2                                                  | NHL repeat containing 2                                                                                                                                              |

|      |                |                                                                                                      |
|------|----------------|------------------------------------------------------------------------------------------------------|
| 0,98 | PPP6R3         | Memczak2013 ALT_ACCEPTOR, ALT_DONOR, coding, INTERNAL, intronic best transcript NM_001164162         |
| 0,98 | DNAJC10        | DnaJ (Hsp40) homolog, subfamily C, member 10                                                         |
| 0,98 | COL21A1        | collagen, type XXI, alpha 1                                                                          |
| 0,98 | BLVRB          | biliverdin reductase B                                                                               |
| 0,98 | LMNB1          | lamin B1                                                                                             |
| 0,98 | SAGE1          | sarcoma antigen 1                                                                                    |
| 0,98 | CD68           | CD68 molecule                                                                                        |
| 0,98 | ATP5A1         | ATP synthase, H <sup>+</sup> transporting, mitochondrial F1 complex, alpha subunit 1, cardiac muscle |
| 0,98 | DHCR24         | 24-dehydrocholesterol reductase                                                                      |
| 0,98 | HSPB9          | heat shock protein, alpha-crystallin-related, B9                                                     |
| 0,98 | HIST1H2AA      | histone cluster 1, H2aa                                                                              |
| 0,98 | SERTAD4        | SERTA domain containing 4                                                                            |
| 0,98 | ACER2          | alkaline ceramidase 2                                                                                |
| 0,98 | SPTBN2         | spectrin, beta, non-erythrocytic 2                                                                   |
| 0,98 | TBCCD1         | TBCC domain containing 1                                                                             |
| 0,98 | DAP3           | death associated protein 3                                                                           |
| 0,98 | SCAF1          | SR-related CTD-associated factor 1                                                                   |
| 0,98 | IVD            | isovaleryl-CoA dehydrogenase                                                                         |
| 0,98 | TDRD10         | tudor domain containing 10                                                                           |
| 0,98 | IFT22          | intraflagellar transport 22                                                                          |
| 0,98 | PNKP           | polynucleotide kinase 3-phosphatase                                                                  |
| 0,98 | APOC2          | apolipoprotein C-II                                                                                  |
| 0,98 | ANXA4          | annexin A4                                                                                           |
| 0,98 | SNAPC5         | small nuclear RNA activating complex polypeptide 5                                                   |
| 0,98 | PELP1          | proline, glutamate and leucine rich protein 1                                                        |
| 0,98 | MSRB1          | methionine sulfoxide reductase B1                                                                    |
| 0,98 | CCNA2          | cyclin A2                                                                                            |
| 0,98 | TEKT5          | tektin 5                                                                                             |
| 0,98 | PLD5           | phospholipase D family, member 5                                                                     |
| 0,98 | OR6C75         | olfactory receptor, family 6, subfamily C, member 75                                                 |
| 0,98 | FBL            | fibrillarin                                                                                          |
| 0,98 | CEP41          | centrosomal protein 41kDa                                                                            |
| 0,98 | ZNF273         | zinc finger protein 273                                                                              |
| 0,98 | RAB12          | RAB12, member RAS oncogene family                                                                    |
| 0,98 | HBS1L          | HBS1-like translational GTPase                                                                       |
| 0,98 | ZBTB26         | zinc finger and BTB domain containing 26                                                             |
| 0,98 | PIGO           | phosphatidylinositol glycan anchor biosynthesis class O                                              |
| 0,98 | C1orf233       | chromosome 1 open reading frame 233                                                                  |
| 0,98 | WDTC1          | WD and tetratricopeptide repeats 1                                                                   |
| 0,98 | VAV1           | vav 1 guanine nucleotide exchange factor                                                             |
| 0,98 | RPUSD2         | RNA pseudouridylate synthase domain containing 2                                                     |
| 0,98 | ZNF766; MIR643 | zinc finger protein 766; microRNA 643                                                                |
| 0,98 | HTN1           | histatin 1                                                                                           |
| 0,98 | FBRF           | fibrosin                                                                                             |
| 0,98 | SSNA1          | Sjogren syndrome nuclear autoantigen 1                                                               |
| 0,98 | C16orf72       | chromosome 16 open reading frame 72                                                                  |

|      |                               |                                                                                                                        |
|------|-------------------------------|------------------------------------------------------------------------------------------------------------------------|
| 0,98 | TBC1D15                       | TBC1 domain family, member 15                                                                                          |
| 0,98 | RAMP2                         | receptor (G protein-coupled) activity modifying protein 2                                                              |
| 0,98 | TSPO                          | translocator protein (18kDa)                                                                                           |
| 0,98 | EIF4G3                        | eukaryotic translation initiation factor 4 gamma, 3                                                                    |
| 0,98 | RPL17-C18orf32                | RPL17-C18orf32 readthrough                                                                                             |
| 0,98 | POC1A                         | POC1 centriolar protein A                                                                                              |
| 0,98 | IL7                           | interleukin 7                                                                                                          |
| 0,98 | KIF18A                        | kinesin family member 18A                                                                                              |
| 0,98 | FAM20B                        | family with sequence similarity 20, member B                                                                           |
| 0,98 | SPINT1                        | serine peptidase inhibitor, Kunitz type 1                                                                              |
| 0,98 | ADGRE2                        | adhesion G protein-coupled receptor E2                                                                                 |
| 0,98 | ZNF678                        | Transcript Identified by AceView, Entrez Gene ID(s) 339500                                                             |
| 0,98 | LAMP1                         | lysosomal-associated membrane protein 1                                                                                |
| 0,98 | DAD1                          | defender against cell death 1                                                                                          |
| 0,98 | EMSY                          | EMSY BRCA2-interacting transcriptional repressor                                                                       |
| 0,98 | PKD2L1                        | polycystic kidney disease 2-like 1                                                                                     |
| 0,98 | RPL3;<br>SNORD83B;<br>SNORD43 | ribosomal protein L3; small nucleolar RNA, C/D box 83B; small nucleolar RNA, C/D box 43                                |
| 0,98 | IL21R                         | interleukin 21 receptor                                                                                                |
| 0,98 | MORN2                         | MORN repeat containing 2                                                                                               |
| 0,98 | POLR1E                        | polymerase (RNA) I polypeptide E                                                                                       |
| 0,98 | ARHGDIA                       | Rho GDP dissociation inhibitor (GDI) alpha                                                                             |
| 0,98 | DNAH9                         | dynein, axonemal, heavy chain 9                                                                                        |
| 0,98 | TNIP2                         | TNFAIP3 interacting protein 2                                                                                          |
| 0,98 | YTHDF1                        | YTH N(6)-methyladenosine RNA binding protein 1                                                                         |
| 0,98 | CT83                          | cancer/testis antigen 83                                                                                               |
| 0,98 | FPGS                          | folylpolyglutamate synthase                                                                                            |
| 0,98 | FSCN3                         | fascin actin-bundling protein 3, testicular                                                                            |
| 0,98 | DNAJC15                       | DnaJ (Hsp40) homolog, subfamily C, member 15                                                                           |
| 0,98 | SPIRE2                        | spire-type actin nucleation factor 2                                                                                   |
| 0,98 | AGTPBP1                       | ATP/GTP binding protein 1                                                                                              |
| 0,98 | PCCA                          | propionyl-CoA carboxylase alpha subunit                                                                                |
| 0,98 | PAIP1                         | poly(A) binding protein interacting protein 1                                                                          |
| 0,98 | NSG1; D4S234E                 | neuron specific gene family member 1; Neuron-specific protein family member 1 [Source:UniProtKB/Swiss-Prot;Acc:P42857] |
| 0,98 | STARD8                        | StAR-related lipid transfer domain containing 8                                                                        |
| 0,98 | MCEE                          | methylmalonyl CoA epimerase                                                                                            |
| 0,98 | GAD1                          | glutamate decarboxylase 1                                                                                              |
| 0,98 | NBPF8                         | neuroblastoma breakpoint family, member 8                                                                              |
| 0,98 | KIAA1715                      | KIAA1715                                                                                                               |
| 0,98 | NAP1L4                        | nucleosome assembly protein 1-like 4                                                                                   |
| 0,98 | PRRG1                         | proline rich Gla (G-carboxyglutamic acid) 1                                                                            |
| 0,98 | FCRL5                         | Fc receptor-like 5                                                                                                     |
| 0,98 | PRR18                         | proline rich 18                                                                                                        |
| 0,98 | EXOC6B                        | exocyst complex component 6B                                                                                           |
| 0,98 | DAGLA                         | diacylglycerol lipase, alpha                                                                                           |

|      |                                |                                                                                                        |
|------|--------------------------------|--------------------------------------------------------------------------------------------------------|
| 0,98 | MTHFR                          | methylenetetrahydrofolate reductase (NAD(P)H)                                                          |
| 0,98 | NT5DC2                         | 5-nucleotidase domain containing 2                                                                     |
| 0,98 | LPAR4                          | lysophosphatidic acid receptor 4                                                                       |
| 0,98 | HHAT                           | hedgehog acyltransferase                                                                               |
| 0,98 | SOX4                           | SRY box 4                                                                                              |
| 0,98 | YRDC                           | yrdC N(6)-threonylcarbamoyltransferase domain containing                                               |
| 0,98 | LRIG1                          |                                                                                                        |
| 0,98 | PRDX2                          | peroxiredoxin 2                                                                                        |
| 0,98 | ARF5                           | ADP-ribosylation factor 5                                                                              |
| 0,98 | ARFGEF3                        | ARFGEF family member 3                                                                                 |
| 0,98 | RAB5C                          | RAB5C, member RAS oncogene family                                                                      |
| 0,98 | SEC24D                         | SEC24 homolog D, COPII coat complex component                                                          |
| 0,98 | EGLN2                          | egl-9 family hypoxia-inducible factor 2                                                                |
| 0,98 | AMOTL2;<br>MIR6827;<br>RPL39P5 | angiomotin like 2; microRNA 6827; ribosomal protein L39 pseudogene 5                                   |
| 0,98 | PRAMEF11                       | PRAME family member 11                                                                                 |
| 0,98 | NR1H2                          | nuclear receptor subfamily 1, group H, member 2                                                        |
| 0,98 | ERVW-1                         | endogenous retrovirus group W, member 1                                                                |
| 0,98 | SSX4B                          | synovial sarcoma, X breakpoint 4B                                                                      |
| 0,98 | GPATCH2                        | G-patch domain containing 2                                                                            |
| 0,98 | ODF2                           | outer dense fiber of sperm tails 2                                                                     |
| 0,98 | RBM17                          | RNA binding motif protein 17                                                                           |
| 0,98 | DSCR3                          | Down syndrome critical region 3                                                                        |
| 0,98 | PGAM1                          | phosphoglycerate mutase 1 (brain)                                                                      |
| 0,98 | PRND                           | prion protein 2 (dublet)                                                                               |
| 0,98 | CTU1                           | cytosolic thiouridylase subunit 1                                                                      |
| 0,98 | DNPH1                          | 2-deoxynucleoside 5-phosphate N-hydrolase 1                                                            |
| 0,98 | SH2B3                          | SH2B adaptor protein 3                                                                                 |
| 0,98 | HIST1H4D                       | histone cluster 1, H4d                                                                                 |
| 0,98 | MIR650; IGLV3-9;<br>IGLV2-8    | microRNA 650; immunoglobulin lambda variable 3-9 (gene/pseudogene); immunoglobulin lambda variable 2-8 |
| 0,98 | STOM                           | stomatin                                                                                               |
| 0,98 | SCD                            | stearoyl-CoA desaturase (delta-9-desaturase)                                                           |
| 0,98 | SPG20                          | spastic paraplegia 20 (Troyer syndrome)                                                                |
| 0,98 | CPLX1                          | complexin 1                                                                                            |
| 0,98 | LSM14A                         | LSM14A mRNA processing body assembly factor                                                            |
| 0,98 | GMFB                           | glia maturation factor, beta                                                                           |
| 0,98 | VIPR1                          | vasoactive intestinal peptide receptor 1                                                               |
| 0,98 | RCL1                           | RNA terminal phosphate cyclase-like 1                                                                  |
| 0,98 | DCDC2B                         | doublecortin domain containing 2B                                                                      |
| 0,98 | NSUN3                          | NOP2/Sun domain family, member 3                                                                       |
| 0,98 | SURF4                          | surfeit 4                                                                                              |
| 0,98 | STRN3                          | striatin, calmodulin binding protein 3                                                                 |
| 0,98 | DUSP12                         | dual specificity phosphatase 12                                                                        |
| 0,98 | MELK                           | maternal embryonic leucine zipper kinase                                                               |
| 0,98 | TOMM40L;<br>MIR5187            | translocase of outer mitochondrial membrane 40 homolog (yeast)-like; microRNA 5187                     |

|      |                                                          |                                                                                                                                                              |
|------|----------------------------------------------------------|--------------------------------------------------------------------------------------------------------------------------------------------------------------|
| 0,98 | CASP9                                                    | caspase 9                                                                                                                                                    |
| 0,98 | COPS5                                                    | COP9 signalosome subunit 5                                                                                                                                   |
| 0,98 | SIPA1L3                                                  | signal-induced proliferation-associated 1 like 3                                                                                                             |
| 0,98 | ATP5F1                                                   | ATP synthase, H <sup>+</sup> transporting, mitochondrial Fo complex subunit B1                                                                               |
| 0,98 | VWA8; MIR5006                                            | von Willebrand factor A domain containing 8; microRNA 5006                                                                                                   |
| 0,98 | ANKRD52                                                  | Zhang2013 ALT_ACCEPTOR, ALT_DONOR, coding, INTERNAL, intronic best transcript NM_173595                                                                      |
| 0,98 | CATSPERG                                                 | catsper channel auxiliary subunit gamma                                                                                                                      |
| 0,98 | BIK                                                      | BCL2-interacting killer (apoptosis-inducing)                                                                                                                 |
| 0,98 | C4orf33                                                  | chromosome 4 open reading frame 33                                                                                                                           |
| 0,98 | TUBB4A                                                   | tubulin, beta 4A class IVa                                                                                                                                   |
| 0,98 | MICU3                                                    | mitochondrial calcium uptake family, member 3                                                                                                                |
| 0,98 | SUOX                                                     | sulfite oxidase                                                                                                                                              |
| 0,98 | COQ7                                                     | coenzyme Q7 homolog, ubiquinone (yeast)                                                                                                                      |
| 0,98 | TRIM49D2;<br>TRIM49D1                                    | tripartite motif containing 49D2; tripartite motif containing 49D1                                                                                           |
| 0,98 | NOC3L                                                    | NOC3-like DNA replication regulator                                                                                                                          |
| 0,98 | SOST                                                     | sclerostin                                                                                                                                                   |
| 0,98 | C15orf57;<br>MRPL42P5                                    | chromosome 15 open reading frame 57; mitochondrial ribosomal protein L42 pseudogene 5                                                                        |
| 0,98 | EIF3C; EIF3CL                                            | eukaryotic translation initiation factor 3, subunit C; eukaryotic translation initiation factor 3, subunit C-like                                            |
| 0,98 | RBL2                                                     | retinoblastoma-like 2                                                                                                                                        |
| 0,98 | KY                                                       | kyphoscoliosis peptidase                                                                                                                                     |
| 0,98 | GNPTG                                                    | N-acetylglucosamine-1-phosphate transferase, gamma subunit                                                                                                   |
| 0,98 | EIF4B                                                    | eukaryotic translation initiation factor 4B                                                                                                                  |
| 0,98 | ZNF687                                                   | zinc finger protein 687                                                                                                                                      |
| 0,98 | PQLC1                                                    | PQ loop repeat containing 1                                                                                                                                  |
| 0,98 | THBS1                                                    | thrombospondin 1                                                                                                                                             |
| 0,98 | CGB7                                                     | chorionic gonadotropin, beta polypeptide 7                                                                                                                   |
| 0,98 | CTNNA2                                                   | catenin (cadherin-associated protein), alpha 2                                                                                                               |
| 0,98 | FAM178B                                                  | family with sequence similarity 178, member B                                                                                                                |
| 0,98 | SEC22B                                                   | SEC22 homolog B, vesicle trafficking protein (gene/pseudogene)                                                                                               |
| 0,98 | SPOP                                                     | speckle-type POZ protein                                                                                                                                     |
| 0,98 | NBPF1                                                    | neuroblastoma breakpoint family, member 1                                                                                                                    |
| 0,98 | DCC                                                      | DCC netrin 1 receptor                                                                                                                                        |
| 0,98 | AMPD2                                                    | adenosine monophosphate deaminase 2                                                                                                                          |
| 0,98 | C7orf65                                                  | chromosome 7 open reading frame 65                                                                                                                           |
| 0,98 | NPTXR                                                    | neuronal pentraxin receptor                                                                                                                                  |
| 0,98 | RPL13A;<br>SNORD35A;<br>SNORD34;<br>SNORD33;<br>SNORD32A | ribosomal protein L13a; small nucleolar RNA, C/D box 35A; small nucleolar RNA, C/D box 34; small nucleolar RNA, C/D box 33; small nucleolar RNA, C/D box 32A |
| 0,98 | FAM83H-AS1                                               | FAM83H antisense RNA 1 (head to head)                                                                                                                        |

|      |                                 |                                                                                                      |
|------|---------------------------------|------------------------------------------------------------------------------------------------------|
| 0,98 | TTLL5                           | tubulin tyrosine ligase-like family member 5                                                         |
| 0,98 | SRPRB                           | signal recognition particle receptor, B subunit                                                      |
| 0,98 | RIOK3                           | RIO kinase 3                                                                                         |
| 0,98 | GRPEL2                          | GrpE-like 2, mitochondrial (E. coli)                                                                 |
| 0,98 | CLDN20                          | claudin 20                                                                                           |
| 0,98 | NDST3                           | N-deacetylase/N-sulfotransferase (heparan glucosaminyl) 3                                            |
| 0,98 | HYPK                            | huntingtin interacting protein K                                                                     |
| 0,98 | FAM50A                          | family with sequence similarity 50, member A                                                         |
| 0,98 | TBX2                            | T-box 2                                                                                              |
| 0,98 | HLA-V                           | major histocompatibility complex, class I, V (pseudogene)                                            |
| 0,98 | CKB                             | creatine kinase, brain                                                                               |
| 0,98 | FLYWCH1                         | Transcript Identified by AceView, Entrez Gene ID(s) 84256                                            |
| 0,98 | HIST2H3A                        | histone cluster 2, H3a                                                                               |
| 0,98 | ABHD11                          | abhydrolase domain containing 11                                                                     |
| 0,98 | M6PR                            | mannose-6-phosphate receptor (cation dependent)                                                      |
| 0,98 | DUSP21                          | dual specificity phosphatase 21                                                                      |
| 0,98 | CSTF1                           | cleavage stimulation factor, 3 pre-RNA, subunit 1                                                    |
| 0,98 | CX3CL1                          | chemokine (C-X3-C motif) ligand 1                                                                    |
| 0,98 | RNF6                            | ring finger protein (C3H2C3 type) 6                                                                  |
| 0,98 | LRRC28                          | leucine rich repeat containing 28                                                                    |
| 0,98 | ANKRD40                         | ankyrin repeat domain 40                                                                             |
| 0,98 | sep-02                          | septin 2                                                                                             |
| 0,98 | CDC20B                          | cell division cycle 20B                                                                              |
| 0,98 | ZNF256                          | zinc finger protein 256                                                                              |
| 0,98 | SMCO1                           | single-pass membrane protein with coiled-coil domains 1                                              |
| 0,98 | TMEM115                         | transmembrane protein 115                                                                            |
| 0,98 | GLIS3                           | GLIS family zinc finger 3                                                                            |
| 0,98 | BRS3                            | bombesin-like receptor 3                                                                             |
| 0,98 | FBXO36                          | F-box protein 36                                                                                     |
| 0,98 | EBF4                            | early B-cell factor 4                                                                                |
| 0,98 | EAF1                            | ELL associated factor 1                                                                              |
| 0,98 | ZNF580; ZNF581                  | zinc finger protein 580; zinc finger protein 581                                                     |
| 0,98 | RELN                            | reelin                                                                                               |
| 0,98 | MED6                            | mediator complex subunit 6                                                                           |
| 0,98 | RNF17                           | ring finger protein 17                                                                               |
| 0,98 | sep-12                          | septin 12                                                                                            |
| 0,98 | EHBP1L1                         | EH domain binding protein 1 like 1                                                                   |
| 0,98 | ZMAT4                           | zinc finger, matrin-type 4                                                                           |
| 0,98 | RSF1                            | remodeling and spacing factor 1                                                                      |
| 0,98 | HINFP                           | histone H4 transcription factor                                                                      |
| 0,98 | C7orf55-LUC7L2; LUC7L2; C7orf55 | C7orf55-LUC7L2 readthrough; LUC7-like 2 pre-mRNA splicing factor; chromosome 7 open reading frame 55 |
| 0,98 | ITPRIPL2                        | inositol 1,4,5-trisphosphate receptor interacting protein-like 2                                     |

|      |                 |                                                                                                              |
|------|-----------------|--------------------------------------------------------------------------------------------------------------|
| 0,98 | PIEZO1          | piezo-type mechanosensitive ion channel component 1                                                          |
| 0,98 | JTB             | jumping translocation breakpoint                                                                             |
| 0,98 | FAM201A         | family with sequence similarity 201, member A                                                                |
| 0,98 | SERPINB10       | serpin peptidase inhibitor, clade B (ovalbumin), member 10                                                   |
| 0,98 | BPY2B           | basic charge, Y-linked, 2B                                                                                   |
| 0,98 | LILRA1          | leukocyte immunoglobulin-like receptor, subfamily A (with TM domain), member 1                               |
| 0,98 | CAT             | catalase                                                                                                     |
| 0,98 | NEDD9           | Memczak2013 ALT_ACCEPTOR, ALT_DONOR, coding, INTERNAL, intronic best transcript NM_001142393                 |
| 0,98 | ST6GALNAC4      | ST6 (alpha-N-acetyl-neuraminy-2,3-beta-galactosyl-1,3)-N-acetylgalactosaminide alpha-2,6-sialyltransferase 4 |
| 0,98 | MESDC2          | mesoderm development candidate 2                                                                             |
| 0,98 | LRRC59          | leucine rich repeat containing 59                                                                            |
| 0,98 | KLHL20          | kelch-like family member 20                                                                                  |
| 0,98 | GIPR            | gastric inhibitory polypeptide receptor                                                                      |
| 0,98 | MAGEA9; MAGEA9B | MAGE family member A9; MAGE family member A9B                                                                |
| 0,98 | BIN3            | bridging integrator 3                                                                                        |
| 0,98 | HS3ST2          | heparan sulfate (glucosamine) 3-O-sulfotransferase 2                                                         |
| 0,98 | RPL36AL         | ribosomal protein L36a-like                                                                                  |
| 0,98 | DDX6            | DEAD (Asp-Glu-Ala-Asp) box helicase 6                                                                        |
| 0,98 | UNC13B          | unc-13 homolog B (C. elegans)                                                                                |
| 0,98 | KCNJ6           | potassium channel, inwardly rectifying subfamily J, member 6                                                 |
| 0,98 | NEBL            | nebulette                                                                                                    |
| 0,98 | SLC16A14        | solute carrier family 16, member 14                                                                          |
| 0,98 | DHX57           | DEAH (Asp-Glu-Ala-Asp/His) box polypeptide 57                                                                |
| 0,98 | TMPRSS2         | transmembrane protease, serine 2                                                                             |
| 0,98 | ART4            | ADP-ribosyltransferase 4 (Dombrock blood group)                                                              |
| 0,98 | NUCB2           | nucleobindin 2                                                                                               |
| 0,98 | ACOT9           | acyl-CoA thioesterase 9                                                                                      |
| 0,98 | FOXB2           | forkhead box B2                                                                                              |
| 0,98 | MANSC1          | MANSC domain containing 1                                                                                    |
| 0,98 | G3BP1           | GTPase activating protein (SH3 domain) binding protein 1                                                     |
| 0,98 | FBXO7           | F-box protein 7                                                                                              |
| 0,98 | TDG             | thymine DNA glycosylase                                                                                      |
| 0,98 | LBP             | lipopolysaccharide binding protein                                                                           |
| 0,98 | B4GALNT1        | beta-1,4-N-acetyl-galactosaminyl transferase 1                                                               |
| 0,98 | OR2L5           | olfactory receptor, family 2, subfamily L, member 5                                                          |
| 0,98 | NKAIN3          | Jeck2013 ANTISENSE, coding, INTERNAL, intronic best transcript NM_173688                                     |
| 0,98 | DRAM1           | DNA-damage regulated autophagy modulator 1                                                                   |
| 0,98 | EIF2S3          | eukaryotic translation initiation factor 2, subunit 3 gamma, 52kDa                                           |

|      |                                         |                                                                                                                                          |
|------|-----------------------------------------|------------------------------------------------------------------------------------------------------------------------------------------|
| 0,98 | NOMO1                                   | NODAL modulator 1                                                                                                                        |
| 0,98 | OR8K3                                   | olfactory receptor, family 8, subfamily K, member 3<br>(gene/pseudogene)                                                                 |
| 0,98 | LOC100287728;<br>RP11-85L21.4;<br>jerva | uncharacterized LOC100287728; Transcript Identified<br>by AceView; novel transcript                                                      |
| 0,98 | NDUFS6                                  | NADH dehydrogenase (ubiquinone) Fe-S protein 6,<br>13kDa (NADH-coenzyme Q reductase)                                                     |
| 0,98 | NAA25                                   | N(alpha)-acetyltransferase 25, NatB auxiliary subunit                                                                                    |
| 0,98 | SLC2A1                                  | solute carrier family 2 (facilitated glucose transporter),<br>member 1                                                                   |
| 0,98 | TSNAX-DISC1                             | TSNAX-DISC1 readthrough (NMD candidate)                                                                                                  |
| 0,98 | ATPAF1                                  | ATP synthase mitochondrial F1 complex assembly<br>factor 1                                                                               |
| 0,98 | SDAD1                                   | SDA1 domain containing 1                                                                                                                 |
| 0,98 | FBXO22                                  | F-box protein 22                                                                                                                         |
| 0,98 | WDR11                                   | WD repeat domain 11                                                                                                                      |
| 0,98 | COX11                                   | COX11 cytochrome c oxidase copper chaperone                                                                                              |
| 0,98 | SLC15A3                                 | solute carrier family 15 (oligopeptide transporter),<br>member 3                                                                         |
| 0,98 | ZNF17                                   | zinc finger protein 17                                                                                                                   |
| 0,98 | ZNF728                                  | zinc finger protein 728                                                                                                                  |
| 0,98 | MARCKSL1                                | MARCKS-like 1                                                                                                                            |
| 0,98 | LEUTX                                   | leucine twenty homeobox                                                                                                                  |
| 0,98 | OR2A12                                  | olfactory receptor, family 2, subfamily A, member 12                                                                                     |
| 0,98 | CT45A3;<br>CT45A4;<br>CT45A5            | cancer/testis antigen family 45, member A3;<br>cancer/testis antigen family 45, member A4;<br>cancer/testis antigen family 45, member A5 |
| 0,98 | PIGY; PYURF                             | phosphatidylinositol glycan anchor biosynthesis class<br>Y; PIGY upstream reading frame                                                  |
| 0,98 | DLG4                                    | discs, large homolog 4 (Drosophila)                                                                                                      |
| 0,98 | CPEB4                                   | cytoplasmic polyadenylation element binding protein 4                                                                                    |
| 0,98 | IL12A                                   | interleukin 12A                                                                                                                          |
| 0,98 | SHANK2                                  | SH3 and multiple ankyrin repeat domains 2                                                                                                |
| 0,98 | PRIM2                                   | Salzman2013 ANNOTATED, CDS, coding, OVCODE,<br>OVEXON, UTR3 best transcript NM_000947                                                    |
| 0,98 | CEP85                                   | centrosomal protein 85kDa                                                                                                                |
| 0,98 | OR5M11                                  | olfactory receptor, family 5, subfamily M, member 11                                                                                     |
| 0,98 | MAGEA11                                 | MAGE family member A11                                                                                                                   |
| 0,98 | AKNAD1                                  | AKNA domain containing 1                                                                                                                 |
| 0,98 | NAPSA                                   | napsin A aspartic peptidase                                                                                                              |
| 0,98 | MAP7D3                                  | MAP7 domain containing 3                                                                                                                 |
| 0,98 | CENPN                                   | centromere protein N                                                                                                                     |
| 0,98 | SPRY4                                   | sprouty RTK signaling antagonist 4                                                                                                       |
| 0,98 | NR2F6                                   | nuclear receptor subfamily 2, group F, member 6                                                                                          |
| 0,98 | GFPT1                                   | glutamine--fructose-6-phosphate transaminase 1                                                                                           |
| 0,98 | EMG1                                    | EMG1 N1-specific pseudouridine methyltransferase                                                                                         |
| 0,98 | YAP1                                    | Yes-associated protein 1                                                                                                                 |

|      |                                           |                                                                                                     |
|------|-------------------------------------------|-----------------------------------------------------------------------------------------------------|
| 0,98 | NOL11                                     | nucleolar protein 11                                                                                |
| 0,98 | TPRX1                                     | tetra-peptide repeat homeobox 1                                                                     |
| 0,98 | ADGRG2                                    | adhesion G protein-coupled receptor G2                                                              |
| 0,98 | KCNJ1                                     | potassium channel, inwardly rectifying subfamily J, member 1                                        |
| 0,98 | KTN1                                      | kinectin 1 (kinesin receptor)                                                                       |
| 0,98 | HSF2BP                                    | heat shock transcription factor 2 binding protein                                                   |
| 0,98 | CLPB                                      | ClpB homolog, mitochondrial AAA ATPase chaperonin                                                   |
| 0,98 | DYNLT1                                    | dynein, light chain, Tctex-type 1                                                                   |
| 0,98 | FOXI1                                     | forkhead box II                                                                                     |
| 0,98 | CLOCK                                     | clock circadian regulator                                                                           |
| 0,98 | TSPO                                      | Memczak2013 ANTISENSE, CDS, coding, INTERNAL best transcript NM_000714                              |
| 0,98 | ALYREF                                    | Aly/REF export factor                                                                               |
| 0,98 | ZNF316                                    | zinc finger protein 316                                                                             |
| 0,98 | BCL2L12                                   | BCL2-like 12 (proline rich)                                                                         |
| 0,98 | SSR2                                      | signal sequence receptor, beta (translocon-associated protein beta)                                 |
| 0,98 | GRTP1                                     | growth hormone regulated TBC protein 1                                                              |
| 0,98 | GDI1                                      | GDP dissociation inhibitor 1                                                                        |
| 0,98 | NOA1                                      | nitric oxide associated 1                                                                           |
| 0,98 | SERPINH1                                  | serpin peptidase inhibitor, clade H (heat shock protein 47), member 1, (collagen binding protein 1) |
| 0,98 | CFAP100                                   | cilia and flagella associated protein 100                                                           |
| 0,98 | DBI                                       | diazepam binding inhibitor (GABA receptor modulator, acyl-CoA binding protein)                      |
| 0,98 | NSUN5P1                                   | NOP2/Sun domain family, member 5 pseudogene 1                                                       |
| 0,98 | AK1                                       | adenylate kinase 1                                                                                  |
| 0,98 | PCNXL4                                    | pecanex-like 4 (Drosophila)                                                                         |
| 0,98 | TNFSF13B                                  | Transcript Identified by AceView, Entrez Gene ID(s) 10673                                           |
| 0,98 | ARFGAP3                                   | ADP-ribosylation factor GTPase activating protein 3                                                 |
| 0,98 | PATE2                                     | prostate and testis expressed 2                                                                     |
| 0,98 | VSTM4                                     | V-set and transmembrane domain containing 4                                                         |
| 0,98 | ING4                                      | inhibitor of growth family member 4                                                                 |
| 0,98 | C18orf8                                   | chromosome 18 open reading frame 8                                                                  |
| 0,98 | LOC102467081;<br>CTD-2313F11.1;<br>slygee | uncharacterized LOC102467081; novel transcript, antisense to GZMK; Transcript Identified by AceView |
| 0,98 | JAM2                                      | junctional adhesion molecule 2                                                                      |
| 0,98 | BLOC1S4                                   | biogenesis of lysosomal organelles complex-1, subunit 4, cappuccino                                 |
| 0,98 | MRPS24                                    | mitochondrial ribosomal protein S24                                                                 |
| 0,98 | EXOC8                                     | exocyst complex component 8                                                                         |
| 0,98 | C16orf90                                  | chromosome 16 open reading frame 90                                                                 |
| 0,98 | HBM                                       | hemoglobin, mu                                                                                      |
| 0,98 | FAM53B                                    | Memczak2013 ALT_ACCEPTOR, ALT_DONOR, coding, INTERNAL, intronic best transcript NM_014661           |

|      |                                  |                                                                                                           |
|------|----------------------------------|-----------------------------------------------------------------------------------------------------------|
| 0,98 | PRR26                            | proline rich 26                                                                                           |
| 0,98 | OR4Q2                            | olfactory receptor, family 4, subfamily Q, member 2 (gene/pseudogene)                                     |
| 0,98 | KLC1                             | kinesin light chain 1                                                                                     |
| 0,98 | ATR                              | ATR serine/threonine kinase                                                                               |
| 0,98 | CDK8                             | cyclin-dependent kinase 8                                                                                 |
| 0,98 | PRR36                            | proline rich 36                                                                                           |
| 0,98 | CDK2                             | cyclin-dependent kinase 2                                                                                 |
| 0,98 | OR8H3                            | olfactory receptor, family 8, subfamily H, member 3                                                       |
| 0,98 | PKD1;<br>MIR6511B2;<br>MIR6511B1 | polycystic kidney disease 1 (autosomal dominant);<br>microRNA 6511b-2; microRNA 6511b-1                   |
| 0,98 | SGIP1                            | SH3-domain GRB2-like (endophilin) interacting protein 1                                                   |
| 0,98 | ADGRG3                           | adhesion G protein-coupled receptor G3                                                                    |
| 0,98 | BCL2L2                           | BCL2-like 2                                                                                               |
| 0,98 | PPIAL4F;<br>PPIAL4D              | peptidylprolyl isomerase A (cyclophilin A)-like 4F;<br>peptidylprolyl isomerase A (cyclophilin A)-like 4D |
| 0,98 | PANK1                            | pantothenate kinase 1                                                                                     |
| 0,98 | GRIN2C                           | glutamate receptor, ionotropic, N-methyl D-aspartate 2C                                                   |
| 0,98 | TMEM215                          | transmembrane protein 215                                                                                 |
| 0,98 | ZNF749                           | zinc finger protein 749                                                                                   |
| 0,98 | PFN4                             | profilin family, member 4                                                                                 |
| 0,98 | ZNF644                           | zinc finger protein 644                                                                                   |
| 0,98 | TAB1                             | TGF-beta activated kinase 1/MAP3K7 binding protein 1                                                      |
| 0,98 | LETMD1                           | LETM1 domain containing 1                                                                                 |
| 0,98 | ARGLU1                           | arginine and glutamate rich 1                                                                             |
| 0,98 | CACNG2                           | calcium channel, voltage-dependent, gamma subunit 2                                                       |
| 0,98 | THRAP3                           | thyroid hormone receptor associated protein 3                                                             |
| 0,98 | NKAIN4                           | Na <sup>+</sup> /K <sup>+</sup> transporting ATPase interacting 4                                         |
| 0,98 | IFNL1                            | interferon, lambda 1                                                                                      |
| 0,98 | AGAP2                            | ArfGAP with GTPase domain, ankyrin repeat and PH domain 2                                                 |
| 0,98 | WDR18                            | WD repeat domain 18                                                                                       |
| 0,98 | EIF2D                            | eukaryotic translation initiation factor 2D                                                               |
| 0,98 | ATP1A1                           | ATPase, Na <sup>+</sup> /K <sup>+</sup> transporting, alpha 1 polypeptide                                 |
| 0,98 | ASB2                             | ankyrin repeat and SOCS box containing 2                                                                  |
| 0,98 | C2orf69                          | chromosome 2 open reading frame 69                                                                        |
| 0,98 | TPD52                            | tumor protein D52                                                                                         |
| 0,98 | LGALS4                           | lectin, galactoside-binding, soluble, 4                                                                   |
| 0,98 | NDUFA10                          | NADH dehydrogenase (ubiquinone) 1 alpha subcomplex, 10, 42kDa                                             |
| 0,98 | POU3F3                           | POU class 3 homeobox 3                                                                                    |
| 0,98 | RFX1                             | regulatory factor X, 1 (influences HLA class II expression)                                               |
| 0,98 | ENY2                             | enhancer of yellow 2 homolog (Drosophila)                                                                 |
| 0,98 | ZNF460                           | zinc finger protein 460                                                                                   |

|      |                    |                                                                                       |
|------|--------------------|---------------------------------------------------------------------------------------|
| 0,98 | MTURN              | maturin, neural progenitor differentiation regulator homolog (Xenopus)                |
| 0,98 | EIF3J              | eukaryotic translation initiation factor 3, subunit J                                 |
| 0,98 | OR10X1             | olfactory receptor, family 10, subfamily X, member 1 (gene/pseudogene)                |
| 0,98 | HAGH               | hydroxyacylglutathione hydrolase                                                      |
| 0,98 | ANO10              | anoctamin 10                                                                          |
| 0,98 | FAM210A            | family with sequence similarity 210, member A                                         |
| 0,98 | ICAM1              | intercellular adhesion molecule 1                                                     |
| 0,98 | GPR108;<br>MIR6791 | G protein-coupled receptor 108; microRNA 6791                                         |
| 0,98 | AHDC1              | AT hook, DNA binding motif, containing 1                                              |
| 0,98 | VGLL3              | vestigial-like family member 3                                                        |
| 0,98 | GOLGA2             | golgin A2                                                                             |
| 0,98 | PGBD1              | piggyBac transposable element derived 1                                               |
| 0,98 | MMP24              | matrix metalloproteinase 24 (membrane-inserted)                                       |
| 0,98 | LRRC31             | leucine rich repeat containing 31                                                     |
| 0,98 | MEMO1              | mediator of cell motility 1                                                           |
| 0,98 | HBEGF              | heparin-binding EGF-like growth factor                                                |
| 0,98 | IRF6               | interferon regulatory factor 6                                                        |
| 0,98 | LMO7               | LIM domain 7                                                                          |
| 0,98 | NASP               | nuclear autoantigenic sperm protein (histone-binding)                                 |
| 0,98 | PTGS2              | prostaglandin-endoperoxide synthase 2 (prostaglandin G/H synthase and cyclooxygenase) |
| 0,98 | C19orf18           | chromosome 19 open reading frame 18                                                   |
| 0,98 | REG1B              | regenerating islet-derived 1 beta                                                     |
| 0,98 | TMEM42;<br>MIR564  | transmembrane protein 42; microRNA 564                                                |
| 0,98 | PRAMEF25           | PRAME family member 25                                                                |
| 0,98 | OR8B2              | olfactory receptor, family 8, subfamily B, member 2                                   |
| 0,98 | RPS10-NUDT3        | RPS10-NUDT3 readthrough                                                               |
| 0,98 | KIAA1033           | KIAA1033                                                                              |
| 0,98 | WDR60              | WD repeat domain 60                                                                   |
| 0,98 | CDKN2AIPNL         | CDKN2A interacting protein N-terminal like                                            |
| 0,98 | MARVELD2           | Transcript Identified by AceView, Entrez Gene ID(s) 153562                            |
| 0,98 | NUB1               | negative regulator of ubiquitin-like proteins 1                                       |
| 0,98 | CDC6               | cell division cycle 6                                                                 |
| 0,98 | PPP2R3B            | protein phosphatase 2, regulatory subunit B, beta                                     |
| 0,98 | PPP2R3B            | protein phosphatase 2, regulatory subunit B, beta                                     |
| 0,98 | GNS                | glucosamine (N-acetyl)-6-sulfatase                                                    |
| 0,98 | NOC4L              | nucleolar complex associated 4 homolog                                                |
| 0,98 | KDEL1              | KDEL (Lys-Asp-Glu-Leu) containing 1                                                   |
| 0,98 | KIAA0922           | KIAA0922                                                                              |
| 0,98 | GAS8               | growth arrest-specific 8                                                              |
| 0,98 | HIST1H2AE          | histone cluster 1, H2ae                                                               |
| 0,98 | CD163              | CD163 molecule                                                                        |
| 0,98 | RHOG               | ras homolog family member G                                                           |
| 0,98 | SF1                | splicing factor 1                                                                     |
| 0,98 | RNF141             | ring finger protein 141                                                               |

|      |                         |                                                                                                      |
|------|-------------------------|------------------------------------------------------------------------------------------------------|
| 0,98 | USE1                    | unconventional SNARE in the ER 1 homolog (S. cerevisiae)                                             |
| 0,98 | BTN3A2                  | butyrophilin, subfamily 3, member A2                                                                 |
| 0,98 | SCAMP3                  | secretory carrier membrane protein 3                                                                 |
| 0,98 | HERPUD1                 | homocysteine-inducible, endoplasmic reticulum stress-inducible, ubiquitin-like domain member 1       |
| 0,98 | ZMAT1                   | zinc finger, matrin-type 1                                                                           |
| 0,98 | PRCD                    | progressive rod-cone degeneration                                                                    |
| 0,98 | ADARB1                  | adenosine deaminase, RNA-specific, B1                                                                |
| 0,98 | OR2T35                  | olfactory receptor, family 2, subfamily T, member 35                                                 |
| 0,98 | TMTC4                   | transmembrane and tetratricopeptide repeat containing 4                                              |
| 0,98 | LILRB2                  | leukocyte immunoglobulin-like receptor, subfamily B (with TM and ITIM domains), member 2             |
| 0,98 | G0S2                    | G0/G1 switch 2                                                                                       |
| 0,98 | HPS5                    | Hermansky-Pudlak syndrome 5                                                                          |
| 0,98 | NMI                     | N-myc (and STAT) interactor                                                                          |
| 0,98 | WWC1                    | WW and C2 domain containing 1                                                                        |
| 0,98 | LINC00337               | long intergenic non-protein coding RNA 337                                                           |
| 0,98 | ELAC2                   | elaC ribonuclease Z 2                                                                                |
| 0,98 | PPP4C                   | protein phosphatase 4, catalytic subunit                                                             |
| 0,98 | APP                     | amyloid beta (A4) precursor protein                                                                  |
| 0,98 | SMARCD1                 | SWI/SNF related, matrix associated, actin dependent regulator of chromatin, subfamily d, member 1    |
| 0,98 | HIST2H3A;<br>HIST2H3C   | histone cluster 2, H3a; histone cluster 2, H3c                                                       |
| 0,98 | ZNF44                   | zinc finger protein 44                                                                               |
| 0,98 | TOPORS-AS1;<br>GVQW1    | TOPORS antisense RNA 1; GVQW motif containing 1                                                      |
| 0,98 | CENPBD1                 | CENPB DNA-binding domain containing 1                                                                |
| 0,98 | ZNF697                  | zinc finger protein 697                                                                              |
| 0,98 | PKM                     | pyruvate kinase, muscle                                                                              |
| 0,98 | C16orf58                | chromosome 16 open reading frame 58                                                                  |
| 0,98 | ZMAT2                   | zinc finger, matrin-type 2                                                                           |
| 0,98 | SLC17A3;<br>HIST1H2APS2 | solute carrier family 17 (organic anion transporter), member 3; histone cluster 1, H2a, pseudogene 2 |
| 0,98 | ASXL2                   | additional sex combs like transcriptional regulator 2                                                |
| 0,98 | WDR1                    | WD repeat domain 1                                                                                   |
| 0,98 | HLA-DPB1                | major histocompatibility complex, class II, DP beta 1                                                |
| 0,98 | C11orf63                | chromosome 11 open reading frame 63                                                                  |
| 0,98 | WNT4                    | wingless-type MMTV integration site family, member 4                                                 |
| 0,98 | SLFN13                  | schlafen family member 13                                                                            |
| 0,98 | CARNS1                  | carnosine synthase 1                                                                                 |
| 0,98 | DBX1                    | developing brain homeobox 1                                                                          |
| 0,98 | ZNF780A                 | zinc finger protein 780A                                                                             |
| 0,98 | PRAMEF25                | PRAME family member 25                                                                               |
| 0,98 | SCLT1                   | sodium channel and clathrin linker 1                                                                 |
| 0,98 | RCC2                    | regulator of chromosome condensation 2                                                               |
| 0,98 | TXNL4A                  | thioredoxin-like 4A                                                                                  |

|      |                                       |                                                                                               |
|------|---------------------------------------|-----------------------------------------------------------------------------------------------|
| 0,98 | CDK2AP2                               | cyclin-dependent kinase 2 associated protein 2                                                |
| 0,98 | TMSB10                                | thymosin beta 10                                                                              |
| 0,98 | CES5A                                 | carboxylesterase 5A                                                                           |
| 0,98 | OTUD6B                                | Transcript Identified by AceView, Entrez Gene ID(s)<br>51633                                  |
| 0,98 | NADK                                  | NAD kinase                                                                                    |
| 0,98 | TMEM187                               | transmembrane protein 187                                                                     |
| 0,98 | PRRT1                                 | proline-rich transmembrane protein 1                                                          |
| 0,98 | NUP88                                 | nucleoporin 88kDa                                                                             |
| 0,98 | USO1                                  | Transcript Identified by AceView, Entrez Gene ID(s)<br>8615                                   |
| 0,98 | ADAR                                  | adenosine deaminase, RNA-specific                                                             |
| 0,98 | HIST1H2BL                             | histone cluster 1, H2bl                                                                       |
| 0,98 | MGAT5                                 | mannosyl (alpha-1,6-)-glycoprotein beta-1,6-N-acetyl-<br>glucosaminyltransferase              |
| 0,98 | DNAH2                                 | dynein, axonemal, heavy chain 2                                                               |
| 0,98 | MICAL3                                | Transcript Identified by AceView, Entrez Gene ID(s)<br>57553                                  |
| 0,98 | TSR3                                  | TSR3, 20S rRNA accumulation, homolog (S.<br>cerevisiae)                                       |
| 0,98 | HIST1H2AH                             | histone cluster 1, H2ah                                                                       |
| 0,98 | NCKAP5L                               | NCK-associated protein 5-like                                                                 |
| 0,98 | TECRL                                 | trans-2,3-enoyl-CoA reductase-like                                                            |
| 0,98 | CPSF1; MIR939;<br>MIR1234;<br>MIR6849 | cleavage and polyadenylation specific factor 1;<br>microRNA 939; microRNA 1234; microRNA 6849 |
| 0,98 | EPOR                                  | erythropoietin receptor                                                                       |
| 0,98 | FBXO24                                | F-box protein 24                                                                              |
| 0,98 | CXXC1                                 | CXXC finger protein 1                                                                         |
| 0,98 | MOB1B                                 | MOB kinase activator 1B                                                                       |
| 0,98 | TMEM64                                | transmembrane protein 64                                                                      |
| 0,98 | CERS4                                 | ceramide synthase 4                                                                           |
| 0,98 | ROCK1                                 | Rho-associated, coiled-coil containing protein kinase 1                                       |
| 0,98 | GLP2R                                 | glucagon-like peptide 2 receptor                                                              |
| 0,98 | DLG1                                  | discs, large homolog 1 (Drosophila)                                                           |
| 0,98 | CISD1                                 | CDGSH iron sulfur domain 1                                                                    |
| 0,98 | CACTIN                                | cactin, spliceosome C complex subunit                                                         |
| 0,98 | BTBD7                                 | BTB (POZ) domain containing 7                                                                 |
| 0,98 | C17orf74                              | chromosome 17 open reading frame 74                                                           |
| 0,98 | FAHD2A                                | Transcript Identified by AceView, Entrez Gene ID(s)<br>51011                                  |
| 0,98 | LIPN                                  | lipase, family member N                                                                       |
| 0,98 | DECR2                                 | 2,4-dienoyl-CoA reductase 2, peroxisomal                                                      |
| 0,98 | OR5K1                                 | olfactory receptor, family 5, subfamily K, member 1                                           |
| 0,98 | CRNN                                  | cornulin                                                                                      |
| 0,98 | TXNL1                                 | thioredoxin-like 1                                                                            |
| 0,98 | RSBN1                                 | round spermatid basic protein 1                                                               |
| 0,98 | KIAA0391                              | KIAA0391                                                                                      |
| 0,98 | GDF11                                 | growth differentiation factor 11                                                              |

|      |                  |                                                                    |
|------|------------------|--------------------------------------------------------------------|
| 0,98 | LAMTOR4          | late endosomal/lysosomal adaptor, MAPK and MTOR activator 4        |
| 0,98 | ATAD3A           | ATPase family, AAA domain containing 3A                            |
| 0,98 | RPL35            | ribosomal protein L35                                              |
| 0,98 | TSPY1            | testis specific protein, Y-linked 1                                |
| 0,98 | OR6K6            | olfactory receptor, family 6, subfamily K, member 6                |
| 0,98 | ALDH1B1          | aldehyde dehydrogenase 1 family, member B1                         |
| 0,98 | LPO              | lactoperoxidase                                                    |
| 0,98 | CHMP1A           | charged multivesicular body protein 1A                             |
| 0,98 | PRPF38A          | pre-mRNA processing factor 38A                                     |
| 0,98 | RPS6             | ribosomal protein S6                                               |
| 0,98 | TACR3            | tachykinin receptor 3                                              |
| 0,98 | ZNF557           | zinc finger protein 557                                            |
| 0,98 | ITSN2            | intersectin 2                                                      |
| 0,98 | EPYC             | epiphycan                                                          |
| 0,98 | RPS6KC1          | ribosomal protein S6 kinase, 52kDa, polypeptide 1                  |
| 0,98 | TMEM181          | transmembrane protein 181                                          |
| 0,98 | GABARAPL1        | GABA(A) receptor-associated protein like 1                         |
| 0,98 | OTX2             | orthodenticle homeobox 2                                           |
| 0,98 | RSG1             | REM2 and RAB-like small GTPase 1                                   |
| 0,98 | USP33            | ubiquitin specific peptidase 33                                    |
| 0,98 | NAGPA            | N-acetylglucosamine-1-phosphodiester alpha-N-acetylglucosaminidase |
| 0,98 | PVRIG            | poliovirus receptor related immunoglobulin domain containing       |
| 0,98 | DNAJB2           | DnaJ (Hsp40) homolog, subfamily B, member 2                        |
| 0,98 | VSX2             | visual system homeobox 2                                           |
| 0,98 | CCDC127          | coiled-coil domain containing 127                                  |
| 0,98 | CAPS2            | calcyphosine 2                                                     |
| 0,98 | CCDC58           | coiled-coil domain containing 58                                   |
| 0,98 | ADH1A            | alcohol dehydrogenase 1A (class I), alpha polypeptide              |
| 0,98 | CHRD             | chordin                                                            |
| 0,98 | C3AR1            | complement component 3a receptor 1                                 |
| 0,98 | C19orf71         | chromosome 19 open reading frame 71                                |
| 0,98 | FGF14; FGF14-IT1 | fibroblast growth factor 14; FGF14 intronic transcript 1           |
| 0,98 | PDYN             | prodynorphin                                                       |
| 0,98 | WDR74            | WD repeat domain 74                                                |
| 0,98 | TOR3A            | torsin family 3, member A                                          |
| 0,98 | CA14             | carbonic anhydrase XIV                                             |
| 0,98 | NCOA3            | nuclear receptor coactivator 3                                     |
| 0,98 | LRRC15           | leucine rich repeat containing 15                                  |
| 0,98 | BID              | BH3 interacting domain death agonist                               |
| 0,98 | AHCTF1           | AT hook containing transcription factor 1                          |
| 0,98 | POLE2            | polymerase (DNA directed), epsilon 2, accessory subunit            |
| 0,98 | KRTAP4-9         | keratin associated protein 4-9                                     |
| 0,98 | PSORS1C2         | psoriasis susceptibility 1 candidate 2                             |
| 0,98 | PPP1R36          | protein phosphatase 1, regulatory subunit 36                       |

|      |                            |                                                                                                         |
|------|----------------------------|---------------------------------------------------------------------------------------------------------|
| 0,98 | C14orf1                    | chromosome 14 open reading frame 1                                                                      |
| 0,98 | CFAP61                     | cilia and flagella associated protein 61                                                                |
| 0,98 | TRA2A                      | transformer 2 alpha homolog (Drosophila)                                                                |
| 0,98 | GMPPB                      | GDP-mannose pyrophosphorylase B                                                                         |
| 0,98 | TIFA                       | TRAF-interacting protein with forkhead-associated domain                                                |
| 0,98 | DTX4                       | deltex 4, E3 ubiquitin ligase                                                                           |
| 0,98 | CHURC1-FNTB                | CHURC1-FNTB readthrough                                                                                 |
| 0,98 | SULT1E1                    | sulfotransferase family 1E member 1                                                                     |
| 0,98 | ZNF831                     | zinc finger protein 831                                                                                 |
| 0,98 | CDC45                      | cell division cycle 45                                                                                  |
| 0,98 | SYK                        | Memczak2013 ANTISENSE, CDS, coding, INTERNAL best transcript NM_001174167                               |
| 0,98 | CTNND1                     | catenin (cadherin-associated protein), delta 1                                                          |
| 0,98 | DYNC1LI1                   | dynein, cytoplasmic 1, light intermediate chain 1                                                       |
| 0,98 | DMBX1                      | diencephalon/mesencephalon homeobox 1                                                                   |
| 0,98 | NAA38                      | N(alpha)-acetyltransferase 38, NatC auxiliary subunit                                                   |
| 0,98 | PLA2G15                    | phospholipase A2, group XV                                                                              |
| 0,98 | RILPL2                     | Rab interacting lysosomal protein-like 2                                                                |
| 0,98 | NCL                        | nucleolin                                                                                               |
| 0,98 | TSLP                       | thymic stromal lymphopoietin                                                                            |
| 0,98 | C9orf114                   | chromosome 9 open reading frame 114                                                                     |
| 0,98 | LOC102724238;<br>LOC554249 | uncharacterized LOC102724238; uncharacterized LOC554249                                                 |
| 0,98 | TAF7                       | TAF7 RNA polymerase II, TATA box binding protein (TBP)-associated factor, 55kDa                         |
| 0,98 | TCF24                      | transcription factor 24                                                                                 |
| 0,98 | ZNF569                     | zinc finger protein 569                                                                                 |
| 0,98 | PELO; ITGA1                | pelota homolog (Drosophila); integrin alpha 1                                                           |
| 0,98 | HNRNPUL2-<br>BSCL2         | HNRNPUL2-BSCL2 readthrough (NMD candidate)                                                              |
| 0,98 | CELF4                      | CUGBP, Elav-like family member 4                                                                        |
| 0,98 | CAPN11                     | calpain 11                                                                                              |
| 0,98 | LOC339803;<br>AC016747.3   | uncharacterized LOC339803; Transcript Identified by AceView, Entrez Gene ID(s) 339803; novel transcript |
| 0,98 | RSPH4A                     | radial spoke head 4 homolog A (Chlamydomonas)                                                           |
| 0,98 | RDH12                      | retinol dehydrogenase 12 (all-trans/9-cis/11-cis)                                                       |
| 0,98 | ZNF385A                    | zinc finger protein 385A                                                                                |
| 0,98 | ANAPC5                     | anaphase promoting complex subunit 5                                                                    |
| 0,98 | HOMER3                     | homer scaffolding protein 3                                                                             |
| 0,98 | KIF23                      | kinesin family member 23                                                                                |
| 0,98 | TMX2-CTNND1                | TMX2-CTNND1 readthrough (NMD candidate)                                                                 |
| 0,98 | UBE2I                      | ubiquitin conjugating enzyme E2I                                                                        |
| 0,98 | C5orf52                    | chromosome 5 open reading frame 52                                                                      |
| 0,98 | MRPL47                     | mitochondrial ribosomal protein L47                                                                     |
| 0,98 | SLC16A3;<br>MIR6787        | solute carrier family 16 (monocarboxylate transporter), member 3; microRNA 6787                         |
| 0,98 | LRRC20                     | Transcript Identified by AceView, Entrez Gene ID(s) 55222                                               |
| 0,98 | KLHL24                     | kelch-like family member 24                                                                             |

|      |               |                                                                                                              |
|------|---------------|--------------------------------------------------------------------------------------------------------------|
| 0,98 | ZFHX2         | zinc finger homeobox 2                                                                                       |
| 0,98 | SNX9          | sorting nexin 9                                                                                              |
| 0,98 | RPL15         | ribosomal protein L15                                                                                        |
| 0,98 | EIF4EBP2      | eukaryotic translation initiation factor 4E binding protein 2                                                |
| 0,98 | CHM           | choroideremia (Rab escort protein 1)                                                                         |
| 0,98 | PSTK          | phosphoserine-tRNA kinase                                                                                    |
| 0,98 | UBXN10        | UBX domain protein 10                                                                                        |
| 0,98 | ST6GALNAC6    | ST6 (alpha-N-acetyl-neuraminy-2,3-beta-galactosyl-1,3)-N-acetylgalactosaminide alpha-2,6-sialyltransferase 6 |
| 0,98 | SBDS          | Shwachman-Bodian-Diamond syndrome                                                                            |
| 0,98 | RPL8; MIR6850 | ribosomal protein L8; microRNA 6850                                                                          |
| 0,98 | RHOH          | ras homolog family member H                                                                                  |
| 0,98 | ARMC8         | armadillo repeat containing 8                                                                                |
| 0,98 | PRCP          | prolylcarboxypeptidase                                                                                       |
| 0,98 | DDAH2         | dimethylarginine dimethylaminohydrolase 2                                                                    |
| 0,98 | FAM19A4       | family with sequence similarity 19 (chemokine (C-C motif)-like), member A4                                   |
| 0,98 | TK1           | thymidine kinase 1, soluble                                                                                  |
| 0,98 | NIN           | ninein (GSK3B interacting protein)                                                                           |
| 0,98 | STK3          | serine/threonine kinase 3                                                                                    |
| 0,98 | TMEM178B      | transmembrane protein 178B                                                                                   |
| 0,98 | MSH2          | mutS homolog 2                                                                                               |
| 0,98 | EPHA7         | EPH receptor A7                                                                                              |
| 0,98 | RFC4          | replication factor C subunit 4                                                                               |
| 0,98 | TMBIM6        | transmembrane BAX inhibitor motif containing 6                                                               |
| 0,98 | FZD9          | frizzled class receptor 9                                                                                    |
| 0,98 | FMO3          | flavin containing monooxygenase 3                                                                            |
| 0,98 | MDM2          | MDM2 proto-oncogene, E3 ubiquitin protein ligase                                                             |
| 0,98 | POLR3E        | polymerase (RNA) III (DNA directed) polypeptide E (80kD)                                                     |
| 0,98 | HOOK2         | hook microtubule-tethering protein 2                                                                         |
| 0,98 | TNFRSF13B     | tumor necrosis factor receptor superfamily, member 13B                                                       |
| 0,98 | CASC1         | cancer susceptibility candidate 1                                                                            |
| 0,98 | MRPL41        | mitochondrial ribosomal protein L41                                                                          |
| 0,98 | IGFBP6        | insulin like growth factor binding protein 6                                                                 |
| 0,98 | IFIT1         | interferon-induced protein with tetratricopeptide repeats 1                                                  |
| 0,98 | TAB2          | TGF-beta activated kinase 1/MAP3K7 binding protein 2                                                         |
| 0,98 | UST           | uronyl-2-sulfotransferase                                                                                    |
| 0,98 | NSMAF         | neutral sphingomyelinase activation associated factor                                                        |
| 0,98 | PSMA7         | proteasome subunit alpha 7                                                                                   |
| 0,98 | TMEM126B      | transmembrane protein 126B                                                                                   |
| 0,98 | USP11         | ubiquitin specific peptidase 11                                                                              |
| 0,98 | OR14A16       | olfactory receptor, family 14, subfamily A, member 16                                                        |
| 0,98 | SCGB1D4       | secretoglobin, family 1D, member 4                                                                           |

|      |            |                                                                                        |
|------|------------|----------------------------------------------------------------------------------------|
| 0,98 | GFPT2      | glutamine-fructose-6-phosphate transaminase 2                                          |
| 0,98 | CASK       | calcium/calmodulin-dependent serine protein kinase (MAGUK family)                      |
| 0,98 | RPL9       | ribosomal protein L9                                                                   |
| 0,98 | NPAP1      | nuclear pore associated protein 1                                                      |
| 0,98 | LOC389895  | chromosome 16 open reading frame 72-like                                               |
| 0,98 | TMEM97     | transmembrane protein 97                                                               |
| 0,98 | HTATIP2    | HIV-1 Tat interactive protein 2                                                        |
| 0,98 | CCM2L      | cerebral cavernous malformation 2-like                                                 |
| 0,98 | PRAMEF20   | PRAME family member 20                                                                 |
| 0,98 | ATP6V1G2   | ATPase, H <sup>+</sup> transporting, lysosomal 13kDa, V1 subunit G2                    |
| 0,98 | DLX6       | distal-less homeobox 6                                                                 |
| 0,98 | TIMM17B    | translocase of inner mitochondrial membrane 17 homolog B (yeast)                       |
| 0,98 | DBH        | dopamine beta-hydroxylase (dopamine beta-monooxygenase)                                |
| 0,98 | NXPE4      | neurexophilin and PC-esterase domain family, member 4                                  |
| 0,98 | HYPM       | huntingtin interacting protein M                                                       |
| 0,98 | MFN1       | mitofusin 1                                                                            |
| 0,98 | GET4       | golgi to ER traffic protein 4                                                          |
| 0,98 | SEN3       | SUMO1/sentrin/SMT3 specific peptidase 3                                                |
| 0,98 | CDKAL1     | Jeck2013 ALT_ACCEPTOR, ALT_DONOR, coding, INTERNAL, intronic best transcript NM_017774 |
| 0,98 | ALG14      | ALG14, UDP-N-acetylglucosaminyltransferase subunit                                     |
| 0,98 | OR1G1      | olfactory receptor, family 1, subfamily G, member 1                                    |
| 0,98 | RPL36A     | ribosomal protein L36a                                                                 |
| 0,98 | ADAM7      | ADAM metallopeptidase domain 7                                                         |
| 0,98 | LRPPRC     | leucine-rich pentatricopeptide repeat containing                                       |
| 0,98 | ZMYM4      | zinc finger, MYM-type 4                                                                |
| 0,98 | NKIRAS2    | NFKB inhibitor interacting Ras-like 2                                                  |
| 0,98 | PCNXL2     | pecanex-like 2 (Drosophila)                                                            |
| 0,98 | LRRTM4     | leucine rich repeat transmembrane neuronal 4                                           |
| 0,98 | FER1L6-AS1 | FER1L6 antisense RNA 1                                                                 |
| 0,98 | TNFRSF11A  | Transcript Identified by AceView, Entrez Gene ID(s) 8792                               |
| 0,98 | MLC1       | megalencephalic leukoencephalopathy with subcortical cysts 1                           |
| 0,98 | R3HDM1     | Transcript Identified by AceView, Entrez Gene ID(s) 23518                              |
| 0,98 | ARHGEF18   | Rho/Rac guanine nucleotide exchange factor 18                                          |
| 0,98 | NGF        | nerve growth factor (beta polypeptide)                                                 |
| 0,98 | HS2ST1     | heparan sulfate 2-O-sulfotransferase 1                                                 |
| 0,98 | EPHX2      | epoxide hydrolase 2, cytoplasmic                                                       |
| 0,98 | ZC3H13     | Memczak2013 ANTISENSE, CDS, coding, INTERNAL best transcript NM_015070                 |
| 0,98 | GPR55      | G protein-coupled receptor 55                                                          |
| 0,98 | C2orf50    | chromosome 2 open reading frame 50                                                     |

|      |                  |                                                                                   |
|------|------------------|-----------------------------------------------------------------------------------|
| 0,98 | RGL1             | ral guanine nucleotide dissociation stimulator-like 1                             |
| 0,98 | PCBP2; PCBP2-OT1 | poly(rC) binding protein 2; PCBP2 overlapping transcript 1                        |
| 0,98 | SF3B6            | splicing factor 3b subunit 6                                                      |
| 0,98 | C11orf54         | chromosome 11 open reading frame 54                                               |
| 0,98 | ZNF350           | zinc finger protein 350                                                           |
| 0,98 | FAM46C           | family with sequence similarity 46, member C                                      |
| 0,98 | HBA1             | hemoglobin, alpha 1                                                               |
| 0,98 | IRX6             | iroquois homeobox 6                                                               |
| 0,98 | ZFAT             | zinc finger and AT hook domain containing                                         |
| 0,98 | ELOVL3           | ELOVL fatty acid elongase 3                                                       |
| 0,98 | PTPRD            | protein tyrosine phosphatase, receptor type, D                                    |
| 0,98 | C4orf47          | chromosome 4 open reading frame 47                                                |
| 0,98 | MUC13            | mucin 13, cell surface associated                                                 |
| 0,98 | ASPN             | asporin                                                                           |
| 0,98 | APLF             | aprataxin and PNKP like factor                                                    |
| 0,98 | CLPS             | colipase, pancreatic                                                              |
| 0,98 | C10orf67         | chromosome 10 open reading frame 67                                               |
| 0,98 | ARAP1            | ArfGAP with RhoGAP domain, ankyrin repeat and PH domain 1                         |
| 0,98 | CRTC3            | CREB regulated transcription coactivator 3                                        |
| 0,98 | OR4K1            | olfactory receptor, family 4, subfamily K, member 1                               |
| 0,98 | LYRM9            | LYR motif containing 9                                                            |
| 0,98 | ACAD9            | acyl-CoA dehydrogenase family, member 9                                           |
| 0,98 | TEAD4            | TEA domain family member 4                                                        |
| 0,98 | PREB             | prolactin regulatory element binding                                              |
| 0,98 | CADM1            | cell adhesion molecule 1                                                          |
| 0,98 | RNF126           | ring finger protein 126                                                           |
| 0,98 | C9orf135         | chromosome 9 open reading frame 135                                               |
| 0,98 | MCMBP            | minichromosome maintenance complex binding protein                                |
| 0,98 | ZEB2             | zinc finger E-box binding homeobox 2                                              |
| 0,98 | CIB3             | calcium and integrin binding family member 3                                      |
| 0,98 | IGSF8            | immunoglobulin superfamily, member 8                                              |
| 0,98 | SLC17A2          | solute carrier family 17, member 2                                                |
| 0,98 | PREPL            | prolyl endopeptidase-like                                                         |
| 0,98 | TTK              | TTK protein kinase                                                                |
| 0,98 | CSF2RB           | colony stimulating factor 2 receptor, beta, low-affinity (granulocyte-macrophage) |
| 0,98 | TMEM88           | transmembrane protein 88                                                          |
| 0,98 | CFAP206          | cilia and flagella associated protein 206                                         |
| 0,98 | CFAP126          | cilia and flagella associated protein 126                                         |
| 0,98 | CWC25            | CWC25 spliceosome-associated protein homolog                                      |
| 0,97 | MRPL20           | mitochondrial ribosomal protein L20                                               |
| 0,97 | TMEM183B         | transmembrane protein 183B                                                        |
| 0,97 | REEP3            | receptor accessory protein 3                                                      |
| 0,97 | EXOSC9           | exosome component 9                                                               |
| 0,97 | KRTAP5-7         | keratin associated protein 5-7                                                    |
| 0,97 | BASP1            | brain abundant, membrane attached signal protein 1                                |
| 0,97 | RGS21            | regulator of G-protein signaling 21                                               |

|      |                       |                                                                                                           |
|------|-----------------------|-----------------------------------------------------------------------------------------------------------|
| 0,97 | CD109                 | CD109 molecule                                                                                            |
| 0,97 | JAG1                  | jagged 1                                                                                                  |
| 0,97 | TSPYL6                | TSPY-like 6                                                                                               |
| 0,97 | SPATA20               | spermatogenesis associated 20                                                                             |
| 0,97 | NME1; NME1-NME2; NME2 | NME/NM23 nucleoside diphosphate kinase 1; NME1-NME2 readthrough; NME/NM23 nucleoside diphosphate kinase 2 |
| 0,97 | LHX5                  | LIM homeobox 5                                                                                            |
| 0,97 | TUBB6                 | tubulin, beta 6 class V                                                                                   |
| 0,97 | FGF11                 | fibroblast growth factor 11                                                                               |
| 0,97 | LDB3                  | LIM domain binding 3                                                                                      |
| 0,97 | MKX                   | mohawk homeobox                                                                                           |
| 0,97 | COPS7B                | COP9 signalosome subunit 7B                                                                               |
| 0,97 | RAB6A                 | RAB6A, member RAS oncogene family                                                                         |
| 0,97 | LRRC23                | leucine rich repeat containing 23                                                                         |
| 0,97 | NRROS                 | negative regulator of reactive oxygen species                                                             |
| 0,97 | BLACAT1; LEMD1        | bladder cancer associated transcript 1 (non-protein coding); LEM domain containing 1                      |
| 0,97 | SCNN1B                | sodium channel, non voltage gated 1 beta subunit                                                          |
| 0,97 | C1QA                  | complement component 1, q subcomponent, A chain                                                           |
| 0,97 | ZNF320                | zinc finger protein 320                                                                                   |
| 0,97 | POLR2D                | polymerase (RNA) II (DNA directed) polypeptide D                                                          |
| 0,97 | EXOC5                 | exocyst complex component 5                                                                               |
| 0,97 | COX7A2L               | cytochrome c oxidase subunit VIIa polypeptide 2 like                                                      |
| 0,97 | PLEKHM1; MIR4315-1    | pleckstrin homology domain containing, family M (with RUN domain) member 1; microRNA 4315-1               |
| 0,97 | KAZN                  | kazrin, periplakin interacting protein                                                                    |
| 0,97 | MAP3K9                | mitogen-activated protein kinase kinase kinase 9                                                          |
| 0,97 | STAMPB                | STAM binding protein                                                                                      |
| 0,97 | FAM218A               | family with sequence similarity 218, member A                                                             |
| 0,97 | RARS2                 | arginyl-tRNA synthetase 2, mitochondrial                                                                  |
| 0,97 | SUCNR1                | succinate receptor 1                                                                                      |
| 0,97 | MLXIP                 | MLX interacting protein                                                                                   |
| 0,97 | OR2A14; OR2A2         | olfactory receptor, family 2, subfamily A, member 14; olfactory receptor, family 2, subfamily A, member 2 |
| 0,97 | LAYN                  | layilin                                                                                                   |
| 0,97 | NUBP1                 | nucleotide binding protein 1                                                                              |
| 0,97 | RIC8A; MIR6743        | RIC8 guanine nucleotide exchange factor A; microRNA 6743                                                  |
| 0,97 | AGAP3                 | ArfGAP with GTPase domain, ankyrin repeat and PH domain 3                                                 |
| 0,97 | CYYR1                 | cysteine/tyrosine-rich 1                                                                                  |
| 0,97 | IFNA13                | interferon, alpha 13                                                                                      |
| 0,97 | TRIM16L               | tripartite motif containing 16-like                                                                       |
| 0,97 | GMPPA                 | GDP-mannose pyrophosphorylase A                                                                           |
| 0,97 | KRTAP19-8             | keratin associated protein 19-8                                                                           |
| 0,97 | IYD                   | iodotyrosine deiodinase                                                                                   |
| 0,97 | BIRC8                 | baculoviral IAP repeat containing 8                                                                       |
| 0,97 | EFR3B                 | EFR3 homolog B                                                                                            |

|      |                          |                                                                                    |
|------|--------------------------|------------------------------------------------------------------------------------|
| 0,97 | MRPS7                    | mitochondrial ribosomal protein S7                                                 |
| 0,97 | C10orf91                 | chromosome 10 open reading frame 91                                                |
| 0,97 | FARP2                    | FERM, ARH/RhoGEF and pleckstrin domain protein 2                                   |
| 0,97 | FAM134C                  | family with sequence similarity 134, member C                                      |
| 0,97 | AMIGO1                   | adhesion molecule with Ig-like domain 1                                            |
| 0,97 | CSF2RA                   | colony stimulating factor 2 receptor, alpha, low-affinity (granulocyte-macrophage) |
| 0,97 | SLU7                     | SLU7 homolog, splicing factor                                                      |
| 0,97 | GPATCH8                  | G-patch domain containing 8                                                        |
| 0,97 | UBE2L6                   | Transcript Identified by AceView, Entrez Gene ID(s) 9246                           |
| 0,97 | NAA40                    | N(alpha)-acetyltransferase 40, NatD catalytic subunit                              |
| 0,97 | CLSPN                    | claspin                                                                            |
| 0,97 | BORCS6                   | BLOC-1 related complex subunit 6                                                   |
| 0,97 | PAPOLB                   | poly(A) polymerase beta                                                            |
| 0,97 | ARPC1A                   | actin related protein 2/3 complex subunit 1A                                       |
| 0,97 | LINC01565                | long intergenic non-protein coding RNA 1565                                        |
| 0,97 | OCIAD2                   | OCIA domain containing 2                                                           |
| 0,97 | HNRNPK; MIR7-1           | heterogeneous nuclear ribonucleoprotein K; microRNA 7-1                            |
| 0,97 | B9D1                     | B9 protein domain 1                                                                |
| 0,97 | C16orf45                 | chromosome 16 open reading frame 45                                                |
| 0,97 | C17orf97                 | chromosome 17 open reading frame 97                                                |
| 0,97 | GPR174                   | G protein-coupled receptor 174                                                     |
| 0,97 | PBX2                     | pre-B-cell leukemia homeobox 2                                                     |
| 0,97 | C8orf59                  | chromosome 8 open reading frame 59                                                 |
| 0,97 | WDR5                     | WD repeat domain 5                                                                 |
| 0,97 | SNAPC4                   | small nuclear RNA activating complex polypeptide 4                                 |
| 0,97 | UNC119B                  | Memczak2013 ANTISENSE, CDS, coding, INTERNAL, UTR3 best transcript NM_001080533    |
| 0,97 | AEBP2                    | AE binding protein 2                                                               |
| 0,97 | SEPSECS                  | Sep (O-phosphoserine) tRNA:Sec (selenocysteine) tRNA synthase                      |
| 0,97 | SLC22A18                 | solute carrier family 22, member 18                                                |
| 0,97 | PHYH                     | phytanoyl-CoA 2-hydroxylase                                                        |
| 0,97 | LOC101928327; AC007557.1 | uncharacterized LOC101928327; novel transcript                                     |
| 0,97 | YIPF6                    | Yip1 domain family member 6                                                        |
| 0,97 | ABHD10                   | abhydrolase domain containing 10                                                   |
| 0,97 | TGIF1                    | TGFB-induced factor homeobox 1                                                     |
| 0,97 | RHBDL3                   | rhomboid, veinlet-like 3 (Drosophila)                                              |
| 0,97 | USP2                     | ubiquitin specific peptidase 2                                                     |
| 0,97 | C18orf65                 | chromosome 18 open reading frame 65                                                |
| 0,97 | CPNE4                    | copine IV                                                                          |
| 0,97 | SSRP1                    | structure specific recognition protein 1                                           |
| 0,97 | BBIP1                    | BBSome interacting protein 1                                                       |
| 0,97 | DDX10                    | DEAD (Asp-Glu-Ala-Asp) box polypeptide 10                                          |
| 0,97 | ALOX12                   | arachidonate 12-lipoxygenase                                                       |
| 0,97 | EIF3H                    | eukaryotic translation initiation factor 3, subunit H                              |

|      |                                       |                                                                                                                                        |
|------|---------------------------------------|----------------------------------------------------------------------------------------------------------------------------------------|
| 0,97 | RBM26                                 | RNA binding motif protein 26                                                                                                           |
| 0,97 | HIST1H3E                              | histone cluster 1, H3e                                                                                                                 |
| 0,97 | XPNPEP1                               | X-prolyl aminopeptidase (aminopeptidase P) 1, soluble                                                                                  |
| 0,97 | ADGRB3                                | adhesion G protein-coupled receptor B3                                                                                                 |
| 0,97 | GABRB2                                | gamma-aminobutyric acid (GABA) A receptor, beta 2                                                                                      |
| 0,97 | LPL                                   | lipoprotein lipase                                                                                                                     |
| 0,97 | APBB2                                 | amyloid beta (A4) precursor protein-binding, family B, member 2                                                                        |
| 0,97 | LRRC37B                               | leucine rich repeat containing 37B                                                                                                     |
| 0,97 | CHCHD10                               | coiled-coil-helix-coiled-coil-helix domain containing 10                                                                               |
| 0,97 | HYLS1                                 | hydroletharus syndrome 1                                                                                                               |
| 0,97 | BLZF1                                 | basic leucine zipper nuclear factor 1                                                                                                  |
| 0,97 | DR1                                   | down-regulator of transcription 1                                                                                                      |
| 0,97 | TOPORS                                | topoisomerase I binding, arginine/serine-rich, E3 ubiquitin protein ligase                                                             |
| 0,97 | HOXA10;<br>HOXA9;<br>MIR196B          | homeobox A10; homeobox A9; microRNA 196b                                                                                               |
| 0,97 | CDC42EP3                              | CDC42 effector protein (Rho GTPase binding) 3                                                                                          |
| 0,97 | SLC28A2                               | solute carrier family 28 (concentrative nucleoside transporter), member 2                                                              |
| 0,97 | LOC101927668;<br>AC005062.2;<br>MACC1 | uncharacterized LOC101927668; Transcript Identified by AceView, Entrez Gene ID(s) 346389; novel transcript, sense overlapping to MACC1 |
| 0,97 | ATP6V1C2                              | ATPase, H <sup>+</sup> transporting, lysosomal 42kDa, V1 subunit C2                                                                    |
| 0,97 | TMEM38A                               | Transcript Identified by AceView, Entrez Gene ID(s) 79041                                                                              |
| 0,97 | RNFT1                                 | ring finger protein, transmembrane 1                                                                                                   |
| 0,97 | TUBAL3                                | tubulin, alpha-like 3                                                                                                                  |
| 0,97 | FCAMR                                 | Fc receptor, IgA, IgM, high affinity                                                                                                   |
| 0,97 | OR4F3                                 | olfactory receptor, family 4, subfamily F, member 3                                                                                    |
| 0,97 | TAL2                                  | T-cell acute lymphocytic leukemia 2                                                                                                    |
| 0,97 | SRL                                   | sarcalumenin                                                                                                                           |
| 0,97 | PRAMEF25                              | PRAME family member 25                                                                                                                 |
| 0,97 | PRAMEF25                              | PRAME family member 25                                                                                                                 |
| 0,97 | PPP1R12A                              | protein phosphatase 1, regulatory subunit 12A                                                                                          |
| 0,97 | RAD51B                                | Jeck2013 ALT_ACCEPTOR, ALT_DONOR, coding, INTERNAL, intronic best transcript NM_133509                                                 |
| 0,97 | OBP2B                                 | odorant binding protein 2B                                                                                                             |
| 0,97 | HGSNAT                                | heparan-alpha-glucosaminide N-acetyltransferase                                                                                        |
| 0,97 | PPIL3                                 | peptidylprolyl isomerase (cyclophilin)-like 3                                                                                          |
| 0,97 | S100A12                               | S100 calcium binding protein A12                                                                                                       |
| 0,97 | DEFB1                                 | defensin, beta 1                                                                                                                       |
| 0,97 | SPACA5                                | sperm acrosome associated 5                                                                                                            |
| 0,97 | SNCB                                  | synuclein beta                                                                                                                         |
| 0,97 | KRTAP29-1                             | keratin associated protein 29-1                                                                                                        |
| 0,97 | IL17C                                 | interleukin 17C                                                                                                                        |

|      |              |                                                                                                                                                                                                                                                                                                                                                                                                                                                                                                                                                                                                                                                                          |
|------|--------------|--------------------------------------------------------------------------------------------------------------------------------------------------------------------------------------------------------------------------------------------------------------------------------------------------------------------------------------------------------------------------------------------------------------------------------------------------------------------------------------------------------------------------------------------------------------------------------------------------------------------------------------------------------------------------|
| 0,97 | UBE2D4       | ubiquitin-conjugating enzyme E2D 4 (putative)                                                                                                                                                                                                                                                                                                                                                                                                                                                                                                                                                                                                                            |
| 0,97 | XAGE2        | X antigen family, member 2                                                                                                                                                                                                                                                                                                                                                                                                                                                                                                                                                                                                                                               |
| 0,97 | HHATL        | hedgehog acyltransferase-like                                                                                                                                                                                                                                                                                                                                                                                                                                                                                                                                                                                                                                            |
| 0,97 | NFIC         | nuclear factor I/C (CCAAT-binding transcription factor)                                                                                                                                                                                                                                                                                                                                                                                                                                                                                                                                                                                                                  |
| 0,97 | BTBD8        | BTB (POZ) domain containing 8                                                                                                                                                                                                                                                                                                                                                                                                                                                                                                                                                                                                                                            |
| 0,97 | UXT          | ubiquitously expressed prefoldin like chaperone                                                                                                                                                                                                                                                                                                                                                                                                                                                                                                                                                                                                                          |
| 0,97 | CHPT1        | choline phosphotransferase 1                                                                                                                                                                                                                                                                                                                                                                                                                                                                                                                                                                                                                                             |
| 0,97 | ERVV-1       | endogenous retrovirus group V, member 1                                                                                                                                                                                                                                                                                                                                                                                                                                                                                                                                                                                                                                  |
| 0,97 | RAD54B; FSBP | RAD54 homolog B ( <i>S. cerevisiae</i> ); fibrinogen silencer binding protein                                                                                                                                                                                                                                                                                                                                                                                                                                                                                                                                                                                            |
| 0,97 | NFIL3        | nuclear factor, interleukin 3 regulated                                                                                                                                                                                                                                                                                                                                                                                                                                                                                                                                                                                                                                  |
| 0,97 | NPIPB11      | nuclear pore complex interacting protein family, member B11                                                                                                                                                                                                                                                                                                                                                                                                                                                                                                                                                                                                              |
| 0,97 | BPTF         | bromodomain PHD finger transcription factor                                                                                                                                                                                                                                                                                                                                                                                                                                                                                                                                                                                                                              |
| 0,97 | BRWD1        | bromodomain and WD repeat domain containing 1                                                                                                                                                                                                                                                                                                                                                                                                                                                                                                                                                                                                                            |
| 0,97 | ANXA11       | annexin A11                                                                                                                                                                                                                                                                                                                                                                                                                                                                                                                                                                                                                                                              |
| 0,97 | TMEM255B     | transmembrane protein 255B                                                                                                                                                                                                                                                                                                                                                                                                                                                                                                                                                                                                                                               |
| 0,97 | TTC6         | tetratricopeptide repeat domain 6                                                                                                                                                                                                                                                                                                                                                                                                                                                                                                                                                                                                                                        |
| 0,97 | ZDHHC3       | zinc finger, DHHC-type containing 3                                                                                                                                                                                                                                                                                                                                                                                                                                                                                                                                                                                                                                      |
| 0,97 | GLG1         | golgi glycoprotein 1                                                                                                                                                                                                                                                                                                                                                                                                                                                                                                                                                                                                                                                     |
| 0,97 | TIMM8A       | translocase of inner mitochondrial membrane 8 homolog A (yeast)                                                                                                                                                                                                                                                                                                                                                                                                                                                                                                                                                                                                          |
| 0,97 | VAMP7        | Homo sapiens vesicle-associated membrane protein 7 (VAMP7), transcript variant 2, mRNA.; Homo sapiens vesicle-associated membrane protein 7 (VAMP7), transcript variant 3, mRNA.; Homo sapiens vesicle-associated membrane protein 7 (VAMP7), transcript variant 1, mRNA.; Homo sapiens vesicle-associated membrane protein 7 (VAMP7), transcript variant 4, non-coding RNA.; Homo sapiens vesicle-associated membrane protein 7 (VAMP7), transcript variant 5, non-coding RNA.; vesicle-associated membrane protein 7 [Source:HGNC Symbol;Acc:HGNC:11486]; Homo sapiens vesicle-associated membrane protein 7, mRNA (cDNA clone MGC:64832 IMAGE:6503665), complete cds. |
| 0,97 | MGAT5B       | mannosyl (alpha-1,6-)-glycoprotein beta-1,6-N-acetylglucosaminyltransferase, isozyme B                                                                                                                                                                                                                                                                                                                                                                                                                                                                                                                                                                                   |
| 0,97 | PIGP         | phosphatidylinositol glycan anchor biosynthesis class P                                                                                                                                                                                                                                                                                                                                                                                                                                                                                                                                                                                                                  |
| 0,97 | SEC14L3      | SEC14-like lipid binding 3                                                                                                                                                                                                                                                                                                                                                                                                                                                                                                                                                                                                                                               |
| 0,97 | NFYA         | nuclear transcription factor Y subunit alpha                                                                                                                                                                                                                                                                                                                                                                                                                                                                                                                                                                                                                             |
| 0,97 | NTS          | neurotensin                                                                                                                                                                                                                                                                                                                                                                                                                                                                                                                                                                                                                                                              |
| 0,97 | RPS25        | ribosomal protein S25                                                                                                                                                                                                                                                                                                                                                                                                                                                                                                                                                                                                                                                    |
| 0,97 | CD200R1      | CD200 receptor 1                                                                                                                                                                                                                                                                                                                                                                                                                                                                                                                                                                                                                                                         |
| 0,97 | ALDOA        | aldolase A, fructose-bisphosphate                                                                                                                                                                                                                                                                                                                                                                                                                                                                                                                                                                                                                                        |
| 0,97 | VAC14        | Vac14 homolog ( <i>S. cerevisiae</i> )                                                                                                                                                                                                                                                                                                                                                                                                                                                                                                                                                                                                                                   |
| 0,97 | BSPH1        | bindin of sperm protein homolog 1                                                                                                                                                                                                                                                                                                                                                                                                                                                                                                                                                                                                                                        |
| 0,97 | ACAD8        | acyl-CoA dehydrogenase family, member 8                                                                                                                                                                                                                                                                                                                                                                                                                                                                                                                                                                                                                                  |

|      |                   |                                                                                  |
|------|-------------------|----------------------------------------------------------------------------------|
| 0,97 | PUF60             | poly-U binding splicing factor 60KDa                                             |
| 0,97 | LAS1L             | LAS1-like, ribosome biogenesis factor                                            |
| 0,97 | BAMBI             | BMP and activin membrane-bound inhibitor                                         |
| 0,97 | PYROXD1           | pyridine nucleotide-disulphide oxidoreductase domain<br>1                        |
| 0,97 | OR6C6             | olfactory receptor, family 6, subfamily C, member 6                              |
| 0,97 | RSPH14            | radial spoke head 14 homolog (Chlamydomonas)                                     |
| 0,97 | ZNF268            | zinc finger protein 268                                                          |
| 0,97 | GREM2             | gremlin 2, DAN family BMP antagonist                                             |
| 0,97 | KCTD17            | potassium channel tetramerization domain containing<br>17                        |
| 0,97 | DOCK10            | dedicator of cytokinesis 10                                                      |
| 0,97 | ABCC6             | ATP binding cassette subfamily C member 6                                        |
| 0,97 | RANBP6            | RAN binding protein 6                                                            |
| 0,97 | SEMA3A            | Transcript Identified by AceView, Entrez Gene ID(s)<br>10371                     |
| 0,97 | TMEM44            | transmembrane protein 44                                                         |
| 0,97 | RAD21L1           | RAD21 cohesin complex component like 1                                           |
| 0,97 | RNMT              | RNA (guanine-7-) methyltransferase                                               |
| 0,97 | EVA1B             | eva-1 homolog B (C. elegans)                                                     |
| 0,97 | PNRC2             | proline-rich nuclear receptor coactivator 2                                      |
| 0,97 | ZNF35             | zinc finger protein 35                                                           |
| 0,97 | MAGEB1;<br>MAGEB4 | MAGE family member B1; MAGE family member B4                                     |
| 0,97 | DET1              | de-etiolated homolog 1 (Arabidopsis)                                             |
| 0,97 | TWISTNB           | TWIST neighbor                                                                   |
| 0,97 | PTER              | phosphotriesterase related                                                       |
| 0,97 | TKFC              | triokinase/FMN cyclase                                                           |
| 0,97 | POLR2B            | polymerase (RNA) II (DNA directed) polypeptide B,<br>140kDa                      |
| 0,97 | MRPS18C           | mitochondrial ribosomal protein S18C                                             |
| 0,97 | AKR1C8P           | aldo-keto reductase family 1, member C8, pseudogene                              |
| 0,97 | RIC8B             | RIC8 guanine nucleotide exchange factor B                                        |
| 0,97 | OXCT2P1           | 3-oxoacid CoA-transferase 2 pseudogene 1                                         |
| 0,97 | FERMT2            | fermitin family member 2                                                         |
| 0,97 | LRRC3C            | leucine rich repeat containing 3C                                                |
| 0,97 | TMOD3             | tropomodulin 3 (ubiquitous)                                                      |
| 0,97 | YWHAB             | tyrosine 3-monooxygenase/tryptophan 5-<br>monooxygenase activation protein, beta |
| 0,97 | ADAMTS15          | ADAM metalloproteinase with thrombospondin type 1<br>motif 15                    |
| 0,97 | POLR3F            | polymerase (RNA) III (DNA directed) polypeptide F,<br>39 kDa                     |
| 0,97 | FOPNL             | FGFR1OP N-terminal like                                                          |
| 0,97 | GNE               | glucosamine (UDP-N-acetyl)-2-epimerase/N-<br>acetylmannosamine kinase            |
| 0,97 | COX7B             | cytochrome c oxidase subunit VIIb                                                |
| 0,97 | SPATA31C2         | SPATA31 subfamily C, member 2                                                    |
| 0,97 | TMED2             | transmembrane p24 trafficking protein 2                                          |

|      |                |                                                                                            |
|------|----------------|--------------------------------------------------------------------------------------------|
| 0,97 | OTUD3          | OTU deubiquitinase 3                                                                       |
| 0,97 | TMEM141        | transmembrane protein 141                                                                  |
| 0,97 | ZNF780A        | zinc finger protein 780A                                                                   |
| 0,97 | RUBCN; MIR922  | RUN domain and cysteine-rich domain containing, Beclin 1-interacting protein; microRNA 922 |
| 0,97 | TSPAN31        | tetraspanin 31                                                                             |
| 0,97 | MEP1A          | meprin A, alpha (PABA peptide hydrolase)                                                   |
| 0,97 | ZNF669         | zinc finger protein 669                                                                    |
| 0,97 | TADA1          | transcriptional adaptor 1                                                                  |
| 0,97 | ZNF221         | zinc finger protein 221                                                                    |
| 0,97 | SEBOX          | SEBOX homeobox                                                                             |
| 0,97 | NDUFB3         | NADH dehydrogenase (ubiquinone) 1 beta subcomplex, 3, 12kDa                                |
| 0,97 | PAQR4          | progesterone and adipoQ receptor family member IV                                          |
| 0,97 | FOXF1          | forkhead box F1                                                                            |
| 0,97 | ACSM4          | acyl-CoA synthetase medium-chain family member 4                                           |
| 0,97 | RAF1           | Raf-1 proto-oncogene, serine/threonine kinase                                              |
| 0,97 | KIAA0430       | Transcript Identified by AceView, Entrez Gene ID(s) 9665                                   |
| 0,97 | TSPYL5         | TSPY-like 5                                                                                |
| 0,97 | KIRREL3        | Jeck2013 ALT_ACCEPTOR, ALT_DONOR, coding, INTERNAL, intronic best transcript NM_032531     |
| 0,97 | TRPV2          | transient receptor potential cation channel, subfamily V, member 2                         |
| 0,97 | TUBGCP5        | tubulin, gamma complex associated protein 5                                                |
| 0,97 | UBR7           | ubiquitin protein ligase E3 component n-recognin 7 (putative)                              |
| 0,97 | LOC100131107   | putative UPF0607 protein ENSP00000383783                                                   |
| 0,97 | ZNF833P        | zinc finger protein 833, pseudogene                                                        |
| 0,97 | MTX1           | metaxin 1                                                                                  |
| 0,97 | HBD            | hemoglobin, delta                                                                          |
| 0,97 | NT5DC3         | 5-nucleotidase domain containing 3                                                         |
| 0,97 | RQCD1          | RCD1 required for cell differentiation1 homolog (S. pombe)                                 |
| 0,97 | UMPS           | uridine monophosphate synthetase                                                           |
| 0,97 | MAMDC2         | MAM domain containing 2                                                                    |
| 0,97 | PCYOX1         | prenylcysteine oxidase 1                                                                   |
| 0,97 | EEF2KMT        | eukaryotic elongation factor 2 lysine methyltransferase                                    |
| 0,97 | NPR3           | natriuretic peptide receptor 3                                                             |
| 0,97 | ZNF33A         | zinc finger protein 33A                                                                    |
| 0,97 | CHRNA10; NUP98 | cholinergic receptor, nicotinic alpha 10; nucleoporin 98kDa                                |
| 0,97 | HEMGN          | hemogen                                                                                    |
| 0,97 | ADGRL1         | adhesion G protein-coupled receptor L1                                                     |
| 0,97 | SPOPL          | speckle-type POZ protein-like                                                              |
| 0,97 | DTX2           | deltex 2, E3 ubiquitin ligase                                                              |
| 0,97 | ADD2           | adducin 2 (beta)                                                                           |
| 0,97 | HEYL           | hes-related family bHLH transcription factor with YRPW motif-like                          |

|      |                |                                                                                                                   |
|------|----------------|-------------------------------------------------------------------------------------------------------------------|
| 0,97 | PRKAB1         | protein kinase, AMP-activated, beta 1 non-catalytic subunit                                                       |
| 0,97 | LRRC71         | leucine rich repeat containing 71                                                                                 |
| 0,97 | MYO6           | myosin VI                                                                                                         |
| 0,97 | TMPRSS15       | transmembrane protease, serine 15                                                                                 |
| 0,97 | SPN            | Memczak2013 ANTISENSE, CDS, coding, INTERNAL best transcript NM_003123                                            |
| 0,97 | EIF2S1         | eukaryotic translation initiation factor 2, subunit 1 alpha, 35kDa                                                |
| 0,97 | CERS6          | ceramide synthase 6                                                                                               |
| 0,97 | EIF3C; EIF3CL  | eukaryotic translation initiation factor 3, subunit C; eukaryotic translation initiation factor 3, subunit C-like |
| 0,97 | RPL7A          | ribosomal protein L7a                                                                                             |
| 0,97 | SH3BP1; PDXP   | SH3-domain binding protein 1; pyridoxal (pyridoxine, vitamin B6) phosphatase                                      |
| 0,97 | METTL13        | methyltransferase like 13                                                                                         |
| 0,97 | ATP13A4        | ATPase type 13A4                                                                                                  |
| 0,97 | LRRC38         | leucine rich repeat containing 38                                                                                 |
| 0,97 | ACCSL          | 1-aminocyclopropane-1-carboxylate synthase (inactive)-like                                                        |
| 0,97 | MLXIP          | MLX interacting protein                                                                                           |
| 0,97 | APOA5          | apolipoprotein A-V                                                                                                |
| 0,97 | SLC35B4        | solute carrier family 35 (UDP-xylose/UDP-N-acetylglucosamine transporter), member B4                              |
| 0,97 | PAIP2          | poly(A) binding protein interacting protein 2                                                                     |
| 0,97 | ARPC5          | actin related protein 2/3 complex subunit 5                                                                       |
| 0,97 | ADNP           | activity-dependent neuroprotector homeobox                                                                        |
| 0,97 | USMG5; MIR1307 | up-regulated during skeletal muscle growth 5 homolog (mouse); microRNA 1307                                       |
| 0,97 | FRMPD3         | FERM and PDZ domain containing 3                                                                                  |
| 0,97 | UNC93B1        | unc-93 homolog B1 (C. elegans)                                                                                    |
| 0,97 | SUFU           | Transcript Identified by AceView, Entrez Gene ID(s) 51684                                                         |
| 0,97 | P2RX3          | purinergic receptor P2X, ligand gated ion channel, 3                                                              |
| 0,97 | ADCK5          | aarF domain containing kinase 5                                                                                   |
| 0,97 | PRMT1          | protein arginine methyltransferase 1                                                                              |
| 0,97 | C14orf2        | chromosome 14 open reading frame 2                                                                                |
| 0,97 | C10orf105      | chromosome 10 open reading frame 105                                                                              |
| 0,97 | RPL34          | ribosomal protein L34                                                                                             |
| 0,97 | UHMK1          | U2AF homology motif (UHM) kinase 1                                                                                |
| 0,97 | OR6M1          | olfactory receptor, family 6, subfamily M, member 1                                                               |
| 0,97 | ORAI2          | ORAI calcium release-activated calcium modulator 2                                                                |
| 0,97 | ZBED2          | zinc finger, BED-type containing 2                                                                                |
| 0,97 | VWDE           | von Willebrand factor D and EGF domains                                                                           |
| 0,97 | EHHADH         | enoyl-CoA, hydratase/3-hydroxyacyl CoA dehydrogenase                                                              |
| 0,97 | KCP            | kielin/chordin-like protein                                                                                       |
| 0,97 | CEPT1          | choline/ethanolamine phosphotransferase 1                                                                         |
| 0,97 | PCNX           | pecanex homolog (Drosophila)                                                                                      |

|      |                    |                                                                                              |
|------|--------------------|----------------------------------------------------------------------------------------------|
| 0,97 | MGME1              | mitochondrial genome maintenance exonuclease 1                                               |
| 0,97 | NFKBID             | nuclear factor of kappa light polypeptide gene enhancer in B-cells inhibitor, delta          |
| 0,97 | PRRC2A             | proline-rich coiled-coil 2A                                                                  |
| 0,97 | PIGBOS1;<br>RAB27A | PIGB opposite strand 1; RAB27A, member RAS oncogene family                                   |
| 0,97 | CAMK2G             | calcium/calmodulin-dependent protein kinase II gamma                                         |
| 0,97 | LCE1B              | late cornified envelope 1B                                                                   |
| 0,97 | TUBGCP3            | tubulin, gamma complex associated protein 3                                                  |
| 0,97 | PABPN1             | poly(A) binding protein, nuclear 1                                                           |
| 0,97 | GNB1               | guanine nucleotide binding protein (G protein), beta polypeptide 1                           |
| 0,97 | CPLX2              | complexin 2                                                                                  |
| 0,97 | ELP4               | elongator acetyltransferase complex subunit 4                                                |
| 0,97 | ZCCHC16            | zinc finger, CCHC domain containing 16                                                       |
| 0,97 | MRPL49             | mitochondrial ribosomal protein L49                                                          |
| 0,97 | CCDC77             | coiled-coil domain containing 77                                                             |
| 0,97 | ATP6V0A2           | ATPase, H <sup>+</sup> transporting, lysosomal V0 subunit a2                                 |
| 0,97 | NARF               | nuclear prelamin A recognition factor                                                        |
| 0,97 | U2AF2              | Memczak2013 ALT_ACCEPTOR, ALT_DONOR, coding, INTERNAL, intronic best transcript NM_001012478 |
| 0,97 | FAM117B            | family with sequence similarity 117, member B                                                |
| 0,97 | FKBP5              | FK506 binding protein 5                                                                      |
| 0,97 | TSPAN4             | tetraspanin 4                                                                                |
| 0,97 | KRTAP19-6          | keratin associated protein 19-6                                                              |
| 0,97 | STK16              | serine/threonine kinase 16                                                                   |
| 0,97 | KLB                | klotho beta                                                                                  |
| 0,97 | STK19              | serine/threonine kinase 19                                                                   |
| 0,97 | ROMO1              | reactive oxygen species modulator 1                                                          |
| 0,97 | METRNL             | meteorin, glial cell differentiation regulator-like                                          |
| 0,97 | PSG6               | pregnancy specific beta-1-glycoprotein 6                                                     |
| 0,97 | CHAF1A             | chromatin assembly factor 1, subunit A (p150)                                                |
| 0,97 | TRA2B              | transformer 2 beta homolog (Drosophila)                                                      |
| 0,97 | ZBTB8OS            | zinc finger and BTB domain containing 8 opposite strand                                      |
| 0,97 | UBL5               | ubiquitin-like 5                                                                             |
| 0,97 | PDE7B              | phosphodiesterase 7B                                                                         |
| 0,97 | NREP               | neuronal regeneration related protein                                                        |
| 0,97 | GUK1               | guanylate kinase 1                                                                           |
| 0,97 | DSCAML1            | Down syndrome cell adhesion molecule like 1                                                  |
| 0,97 | QRFP               | pyroglutamylated RFamide peptide                                                             |
| 0,97 | MTMR6              | Transcript Identified by AceView, Entrez Gene ID(s) 9107                                     |
| 0,97 | SLC9A7             | solute carrier family 9, subfamily A (NHE7, cation proton antiporter 7), member 7            |
| 0,97 | DPP8               | dipeptidyl-peptidase 8                                                                       |
| 0,97 | CASP1              | caspase 1                                                                                    |
| 0,97 | CTDSP1             | CTD small phosphatase 1                                                                      |

|      |          |                                                                                  |
|------|----------|----------------------------------------------------------------------------------|
| 0,97 | PPFIBP1  | PTPRF interacting protein, binding protein 1 (liprin beta 1)                     |
| 0,97 | CELA1    | chymotrypsin-like elastase family, member 1                                      |
| 0,97 | TMEM8A   | transmembrane protein 8A                                                         |
| 0,97 | SV2A     | synaptic vesicle glycoprotein 2A                                                 |
| 0,97 | ACLY     | ATP citrate lyase                                                                |
| 0,97 | MYH9     | Memczak2013 ANTISENSE, CDS, coding, INTERNAL best transcript NM_002473           |
| 0,97 | RER1     | retention in endoplasmic reticulum sorting receptor 1                            |
| 0,97 | TMEM30B  | transmembrane protein 30B                                                        |
| 0,97 | ZKSCAN7  | zinc finger with KRAB and SCAN domains 7                                         |
| 0,97 | CBS      | cystathionine-beta-synthase                                                      |
| 0,97 | AP1AR    | adaptor-related protein complex 1 associated regulatory protein                  |
| 0,97 | IPO8     | importin 8                                                                       |
| 0,97 | CASP3    | caspase 3                                                                        |
| 0,97 | ANKRD13C | ankyrin repeat domain 13C                                                        |
| 0,97 | PVALB    | parvalbumin                                                                      |
| 0,97 | GPR87    | G protein-coupled receptor 87                                                    |
| 0,97 | TMOD4    | tropomodulin 4 (muscle)                                                          |
| 0,97 | VPS37B   | vacuolar protein sorting 37 homolog B (S. cerevisiae)                            |
| 0,97 | REP15    | RAB15 effector protein                                                           |
| 0,97 | DNAJB11  | DnaJ (Hsp40) homolog, subfamily B, member 11                                     |
| 0,97 | CTU2     | cytosolic thiouridylase subunit 2 homolog (S. pombe)                             |
| 0,97 | DIO2     | deiodinase, iodothyronine, type II                                               |
| 0,97 | SYNE4    | spectrin repeat containing, nuclear envelope family member 4                     |
| 0,97 | FUT8     | fucosyltransferase 8 (alpha (1,6) fucosyltransferase)                            |
| 0,97 | KRT32    | keratin 32, type I                                                               |
| 0,97 | DEFB4A   | defensin, beta 4A                                                                |
| 0,97 | MBNL3    | muscleblind-like splicing regulator 3                                            |
| 0,97 | DPPA5    | developmental pluripotency associated 5                                          |
| 0,97 | ACAP2    | ArfGAP with coiled-coil, ankyrin repeat and PH domains 2                         |
| 0,97 | FMN1     | formin 1                                                                         |
| 0,97 | OR2F1    | olfactory receptor, family 2, subfamily F, member 1 (gene/pseudogene)            |
| 0,97 | BACH1    | BTB and CNC homology 1, basic leucine zipper transcription factor 1              |
| 0,97 | FLOT2    | Memczak2013 ANTISENSE, CDS, coding, INTERNAL, intronic best transcript NM_004475 |
| 0,97 | GOLGA3   | golgin A3                                                                        |
| 0,97 | DPRX     | divergent-paired related homeobox                                                |
| 0,97 | MEI4     | meiotic double-stranded break formation protein 4                                |
| 0,97 | TRMO     | tRNA methyltransferase O                                                         |
| 0,97 | PCDH10   | protocadherin 10                                                                 |
| 0,97 | ATP6V1G1 | ATPase, H+ transporting, lysosomal 13kDa, V1 subunit G1                          |
| 0,97 | PRMT8    | protein arginine methyltransferase 8                                             |

|      |                     |                                                                                                       |
|------|---------------------|-------------------------------------------------------------------------------------------------------|
| 0,97 | SEMA6D              | sema domain, transmembrane domain (TM), and cytoplasmic domain, (semaphorin) 6D                       |
| 0,97 | CYTH1               | cytohesin 1                                                                                           |
| 0,97 | S100A13             | S100 calcium binding protein A13                                                                      |
| 0,97 | MCM7                | minichromosome maintenance complex component 7                                                        |
| 0,97 | DDX39A              | DEAD (Asp-Glu-Ala-Asp) box polypeptide 39A                                                            |
| 0,97 | NOM1                | nucleolar protein with MIF4G domain 1                                                                 |
| 0,97 | LRRFIP2             | leucine rich repeat (in FLII) interacting protein 2                                                   |
| 0,97 | PATZ1               | POZ (BTB) and AT hook containing zinc finger 1                                                        |
| 0,97 | IFNAR2              | interferon (alpha, beta and omega) receptor 2                                                         |
| 0,97 | CHRNA5              | cholinergic receptor, nicotinic alpha 5                                                               |
| 0,97 | TANGO6              | transport and golgi organization 6 homolog                                                            |
| 0,97 | UTP15               | UTP15, U3 small nucleolar ribonucleoprotein, homolog (S. cerevisiae)                                  |
| 0,97 | CAMKMT              | Memczak2013 ALT_ACCEPTOR, ALT_DONOR, coding, INTERNAL, intronic best transcript NM_024766             |
| 0,97 | SLAMF1              | signaling lymphocytic activation molecule family member 1                                             |
| 0,97 | PRPF3               | pre-mRNA processing factor 3                                                                          |
| 0,97 | SLIT3               | slit guidance ligand 3                                                                                |
| 0,97 | VAPA                | VAMP associated protein A                                                                             |
| 0,97 | IFI27L1             | interferon, alpha-inducible protein 27-like 1                                                         |
| 0,97 | FNBP1               | formin binding protein 1                                                                              |
| 0,97 | SETDB2              | SET domain, bifurcated 2                                                                              |
| 0,97 | ENTPD2              | ectonucleoside triphosphate diphosphohydrolase 2                                                      |
| 0,97 | DUX3                | double homeobox 3                                                                                     |
| 0,97 | RIC1                | RIC1 homolog, RAB6A GEF complex partner 1                                                             |
| 0,97 | NFE2L2              | nuclear factor, erythroid 2-like 2                                                                    |
| 0,97 | AMZ2                | archaelysin family metallopeptidase 2                                                                 |
| 0,97 | HTR3D               | 5-hydroxytryptamine (serotonin) receptor 3D, ionotropic                                               |
| 0,97 | TMEM191C            | transmembrane protein 191C                                                                            |
| 0,97 | DNAH17              | dynein, axonemal, heavy chain 17                                                                      |
| 0,97 | DEPDC1B             | DEP domain containing 1B                                                                              |
| 0,97 | CKLF-CMTM1          | CKLF-CMTM1 readthrough                                                                                |
| 0,97 | ZFP62               | ZFP62 zinc finger protein                                                                             |
| 0,97 | NCOA6               | nuclear receptor coactivator 6                                                                        |
| 0,97 | COL8A2              | collagen, type VIII, alpha 2                                                                          |
| 0,97 | AKAP4               | A kinase (PRKA) anchor protein 4                                                                      |
| 0,97 | SURF4               | surfeit 4                                                                                             |
| 0,97 | COL25A1             | collagen, type XXV, alpha 1                                                                           |
| 0,97 | CALM1               | calmodulin 1 (phosphorylase kinase, delta)                                                            |
| 0,97 | ZNF572              | zinc finger protein 572                                                                               |
| 0,97 | SDC2                | syndecan 2                                                                                            |
| 0,97 | DOCK9               | dedicator of cytokinesis 9                                                                            |
| 0,97 | CTBP2               | C-terminal binding protein 2                                                                          |
| 0,97 | SLC35B2;<br>MIR4647 | solute carrier family 35 (adenosine 3-phospho 5-phosphosulfate transporter), member B2; microRNA 4647 |

|      |                                 |                                                                                                                     |
|------|---------------------------------|---------------------------------------------------------------------------------------------------------------------|
| 0,97 | CCDC146                         | coiled-coil domain containing 146                                                                                   |
| 0,97 | PLA2G4A                         | phospholipase A2, group IVA (cytosolic, calcium-dependent)                                                          |
| 0,97 | HMBS                            | hydroxymethylbilane synthase                                                                                        |
| 0,97 | MKKS                            | McKusick-Kaufman syndrome                                                                                           |
| 0,97 | CCDC109B                        | coiled-coil domain containing 109B                                                                                  |
| 0,97 | IQGAP3                          | IQ motif containing GTPase activating protein 3                                                                     |
| 0,97 | ERI3; ERI3-IT1                  | ERI1 exoribonuclease family member 3; ERI3 intronic transcript 1                                                    |
| 0,97 | TOX                             | thymocyte selection-associated high mobility group box                                                              |
| 0,97 | BMPR2                           | bone morphogenetic protein receptor type II                                                                         |
| 0,97 | CHD1L                           | chromodomain helicase DNA binding protein 1-like                                                                    |
| 0,97 | DUSP22                          | dual specificity phosphatase 22                                                                                     |
| 0,97 | KRTAP4-11                       | keratin associated protein 4-11                                                                                     |
| 0,97 | PTGES3L-AARSD1; PTGES3L; AARSD1 | PTGES3L-AARSD1 readthrough; prostaglandin E synthase 3 (cytosolic)-like; alanyl-tRNA synthetase domain containing 1 |
| 0,97 | LRRC3B                          | leucine rich repeat containing 3B                                                                                   |
| 0,97 | TMEM223                         | transmembrane protein 223                                                                                           |
| 0,97 | CIRBP                           | cold inducible RNA binding protein                                                                                  |
| 0,97 | NUMB                            | numb homolog (Drosophila)                                                                                           |
| 0,97 | PAX8                            | paired box 8                                                                                                        |
| 0,97 | ZNF41                           | zinc finger protein 41                                                                                              |
| 0,97 | PIGT                            | phosphatidylinositol glycan anchor biosynthesis class T                                                             |
| 0,97 | FBXO9                           | F-box protein 9                                                                                                     |
| 0,97 | RBM47                           | RNA binding motif protein 47                                                                                        |
| 0,97 | MAML3                           | Memczak2013 ALT_ACCEPTOR, ALT_DONOR, coding, INTERNAL, intronic best transcript NM_018717                           |
| 0,97 | ZNF436-AS1                      | ZNF436 antisense RNA 1                                                                                              |
| 0,97 | SPRED2                          | sprouty-related, EVH1 domain containing 2                                                                           |
| 0,97 | ATG2B                           | autophagy related 2B                                                                                                |
| 0,97 | BRD9                            | bromodomain containing 9                                                                                            |
| 0,97 | EXOC2                           | exocyst complex component 2                                                                                         |
| 0,97 | RBCK1                           | RanBP-type and C3HC4-type zinc finger containing 1                                                                  |
| 0,97 | UQCC2                           | ubiquinol-cytochrome c reductase complex assembly factor 2                                                          |
| 0,97 | PIF1                            | PIF1 5-to-3 DNA helicase                                                                                            |
| 0,97 | BOLL                            | boule homolog, RNA binding protein                                                                                  |
| 0,97 | C21orf58                        | chromosome 21 open reading frame 58                                                                                 |
| 0,97 | SUMO2                           | small ubiquitin-like modifier 2                                                                                     |
| 0,97 | KCNK16                          | potassium channel, two pore domain subfamily K, member 16                                                           |
| 0,97 | ARSE                            | arylsulfatase E (chondrodysplasia punctata 1)                                                                       |
| 0,97 | INPP5D                          | inositol polyphosphate-5-phosphatase D                                                                              |
| 0,97 | RPS27A                          | ribosomal protein S27a                                                                                              |
| 0,97 | STK11IP                         | serine/threonine kinase 11 interacting protein                                                                      |

|      |                 |                                                                                                   |
|------|-----------------|---------------------------------------------------------------------------------------------------|
| 0,97 | NR2C2AP         | nuclear receptor 2C2-associated protein                                                           |
| 0,97 | SFTPB           | surfactant protein B                                                                              |
| 0,97 | DNAJB11         | DnaJ (Hsp40) homolog, subfamily B, member 11                                                      |
| 0,97 | GNA12           | guanine nucleotide binding protein (G protein) alpha 12                                           |
| 0,97 | LINC00282       | long intergenic non-protein coding RNA 282                                                        |
| 0,97 | WSB2            | WD repeat and SOCS box containing 2                                                               |
| 0,97 | RHBDL3          | Transcript Identified by AceView, Entrez Gene ID(s) 162494                                        |
| 0,97 | HHLA3           | HERV-H LTR-associating 3                                                                          |
| 0,97 | SIAE            | sialic acid acetyltransferase                                                                     |
| 0,97 | ZNF638          | zinc finger protein 638                                                                           |
| 0,97 | MRPL12          | mitochondrial ribosomal protein L12                                                               |
| 0,97 | GOLIM4          | golgi integral membrane protein 4                                                                 |
| 0,97 | PIWIL2          | piwi-like RNA-mediated gene silencing 2                                                           |
| 0,97 | PSMD10          | proteasome 26S subunit, non-ATPase 10                                                             |
| 0,97 | NOMO3;<br>NOMO2 | NODAL modulator 3; NODAL modulator 2                                                              |
| 0,97 | LPAR1           | lysophosphatidic acid receptor 1                                                                  |
| 0,97 | KARS            | lysyl-tRNA synthetase                                                                             |
| 0,97 | F10             | coagulation factor X                                                                              |
| 0,97 | AHCYL1          | adenosylhomocysteinase like 1                                                                     |
| 0,97 | SMARCE1         | SWI/SNF related, matrix associated, actin dependent regulator of chromatin, subfamily e, member 1 |
| 0,97 | AHRR; PDCD6     | aryl-hydrocarbon receptor repressor; programmed cell death 6                                      |
| 0,97 | MAPRE1          | microtubule-associated protein, RP/EB family, member 1                                            |
| 0,97 | GBA3            | glucosidase, beta, acid 3 (gene/pseudogene)                                                       |
| 0,97 | C22orf31        | chromosome 22 open reading frame 31                                                               |
| 0,97 | ZMYND11         | zinc finger, MYND-type containing 11                                                              |
| 0,97 | KRTAP9-4        | keratin associated protein 9-4                                                                    |
| 0,97 | TAS2R50         | taste receptor, type 2, member 50                                                                 |
| 0,97 | LBR             | lamin B receptor                                                                                  |
| 0,97 | TIMM23          | translocase of inner mitochondrial membrane 23 homolog (yeast)                                    |
| 0,97 | PPP1R35         | protein phosphatase 1, regulatory subunit 35                                                      |
| 0,97 | TPM1            | tropomyosin 1 (alpha)                                                                             |
| 0,97 | SLC2A7          | solute carrier family 2 (facilitated glucose transporter), member 7                               |
| 0,97 | TBPL2           | TATA box binding protein like 2                                                                   |
| 0,97 | ZNF706          | zinc finger protein 706                                                                           |
| 0,97 | POU5F1          | POU class 5 homeobox 1                                                                            |
| 0,97 | SRSF7           | serine/arginine-rich splicing factor 7                                                            |
| 0,97 | NBPF10          | neuroblastoma breakpoint family, member 10                                                        |
| 0,97 | ZDHHC17         | zinc finger, DHHC-type containing 17                                                              |
| 0,97 | SRR             | serine racemase                                                                                   |
| 0,97 | OFCC1           | orofacial cleft 1 candidate 1                                                                     |
| 0,97 | SPRED1          | sprouty-related, EVH1 domain containing 1                                                         |
| 0,97 | ZFAND1          | zinc finger, AN1-type domain 1                                                                    |

|      |                     |                                                                                                                                                                                                                          |
|------|---------------------|--------------------------------------------------------------------------------------------------------------------------------------------------------------------------------------------------------------------------|
| 0,97 | TK2                 | thymidine kinase 2, mitochondrial                                                                                                                                                                                        |
| 0,97 | SELT; SELT.1        | selenoprotein T; SELT protein; Selenoprotein T; cDNA FLJ90525 fis, clone NT2RP4001001, highly similar to Selenoprotein T [Source:UniProtKB/TrEMBL;Acc:Q6IAK0]; Transcript Identified by AceView, Entrez Gene ID(s) 51714 |
| 0,97 | CAPN13              | calpain 13                                                                                                                                                                                                               |
| 0,97 | MPHOSPH8            | M-phase phosphoprotein 8                                                                                                                                                                                                 |
| 0,97 | CACFD1              | calcium channel flower domain containing 1                                                                                                                                                                               |
| 0,97 | PJA1                | praja ring finger 1, E3 ubiquitin protein ligase                                                                                                                                                                         |
| 0,97 | PHF7                | PHD finger protein 7                                                                                                                                                                                                     |
| 0,97 | OR4K3               | olfactory receptor family 4 subfamily K member 3 (gene/pseudogene) [Source:HGNC Symbol;Acc:HGNC:14731]                                                                                                                   |
| 0,97 | OR6C2               | olfactory receptor, family 6, subfamily C, member 2                                                                                                                                                                      |
| 0,97 | NQO2                | NAD(P)H dehydrogenase, quinone 2                                                                                                                                                                                         |
| 0,97 | PRR23D2             | proline rich 23 domain containing 2                                                                                                                                                                                      |
| 0,97 | CAPNS1              | calpain, small subunit 1                                                                                                                                                                                                 |
| 0,97 | CTD-3032H12.2; IRX5 | Transcript Identified by AceView, Entrez Gene ID(s) 10265; novel transcript                                                                                                                                              |
| 0,97 | PDE4DIP             | phosphodiesterase 4D interacting protein                                                                                                                                                                                 |
| 0,97 | ZNF620              | zinc finger protein 620                                                                                                                                                                                                  |
| 0,97 | SERPINB8            | serpin peptidase inhibitor, clade B (ovalbumin), member 8                                                                                                                                                                |
| 0,97 | FMN1                | formin 1                                                                                                                                                                                                                 |
| 0,97 | FAM217A             | family with sequence similarity 217, member A                                                                                                                                                                            |
| 0,97 | EMC3                | ER membrane protein complex subunit 3                                                                                                                                                                                    |
| 0,97 | DEGS2               | delta(4)-desaturase, sphingolipid 2                                                                                                                                                                                      |
| 0,97 | VWA1                | von Willebrand factor A domain containing 1                                                                                                                                                                              |
| 0,97 | VPS45               | vacuolar protein sorting 45 homolog (S. cerevisiae)                                                                                                                                                                      |
| 0,97 | OSR2                | odd-skipped related transcription factor 2                                                                                                                                                                               |
| 0,97 | TBC1D5              | TBC1 domain family, member 5                                                                                                                                                                                             |
| 0,97 | CAPN9               | calpain 9                                                                                                                                                                                                                |
| 0,97 | DHX35               | Memczak2013 ANTISENSE, coding, INTERNAL, intronic best transcript NM_021931                                                                                                                                              |
| 0,97 | CLEC9A              | C-type lectin domain family 9, member A                                                                                                                                                                                  |
| 0,97 | MMP14               | matrix metalloproteinase 14 (membrane-inserted)                                                                                                                                                                          |
| 0,97 | CERS3               | ceramide synthase 3                                                                                                                                                                                                      |
| 0,97 | CELF1               | CUGBP, Elav-like family member 1                                                                                                                                                                                         |
| 0,97 | PRDM11              | PR domain containing 11                                                                                                                                                                                                  |
| 0,97 | KLHL28              | kelch-like family member 28                                                                                                                                                                                              |
| 0,97 | SGSM2               | small G protein signaling modulator 2                                                                                                                                                                                    |
| 0,97 | C5orf49             | chromosome 5 open reading frame 49                                                                                                                                                                                       |
| 0,97 | NOMO2               | NODAL modulator 2                                                                                                                                                                                                        |
| 0,97 | RNF20               | ring finger protein 20, E3 ubiquitin protein ligase                                                                                                                                                                      |
| 0,97 | LTN1                | listerin E3 ubiquitin protein ligase 1                                                                                                                                                                                   |
| 0,97 | SI                  | sucrase-isomaltase (alpha-glucosidase)                                                                                                                                                                                   |
| 0,97 | BBS10               | Bardet-Biedl syndrome 10                                                                                                                                                                                                 |

|      |                     |                                                                                                                   |
|------|---------------------|-------------------------------------------------------------------------------------------------------------------|
| 0,97 | FAM89A;<br>MIR1182  | family with sequence similarity 89, member A;<br>microRNA 1182                                                    |
| 0,97 | ACVRL1              | Memczak2013 ANTISENSE, CDS, coding,<br>INTERNAL, intronic best transcript NM_001077401                            |
| 0,97 | CCT7                | chaperonin containing TCP1, subunit 7 (eta)                                                                       |
| 0,97 | RUSC1               | RUN and SH3 domain containing 1                                                                                   |
| 0,97 | GFRA1               | GDNF family receptor alpha 1                                                                                      |
| 0,97 | FAM83A              | family with sequence similarity 83, member A                                                                      |
| 0,97 | AF131215.3;<br>XKR6 | Memczak2013 ALT_ACCEPTOR, ALT_DONOR,<br>coding, INTERNAL, intronic best transcript<br>NM_173683; novel transcript |
| 0,97 | FAM120AOS           | family with sequence similarity 120A opposite strand                                                              |
| 0,97 | UQCRFS1             | ubiquinol-cytochrome c reductase, Rieske iron-sulfur<br>polypeptide 1                                             |
| 0,97 | N4BP2L2             | NEDD4 binding protein 2-like 2                                                                                    |
| 0,97 | FAM122C             | family with sequence similarity 122C                                                                              |
| 0,97 | TPGS2               | tubulin polyglutamylase complex subunit 2                                                                         |
| 0,97 | GOLGA6D             | golgin A6 family, member D                                                                                        |
| 0,97 | C17orf99            | chromosome 17 open reading frame 99                                                                               |
| 0,97 | ERGIC1              | endoplasmic reticulum-golgi intermediate compartment<br>1                                                         |
| 0,97 | PLA2G12A            | Memczak2013 ANTISENSE, CDS, coding,<br>INTERNAL best transcript NM_030821                                         |
| 0,97 | ADAMTS10            | ADAM metalloproteinase with thrombospondin type 1<br>motif 10                                                     |
| 0,97 | ACOX1               | acyl-CoA oxidase 1, palmitoyl                                                                                     |
| 0,97 | SF3B2               | splicing factor 3b subunit 2                                                                                      |
| 0,97 | INHBC               | inhibin beta C                                                                                                    |
| 0,97 | SDHC                | succinate dehydrogenase complex, subunit C, integral<br>membrane protein, 15kDa                                   |
| 0,97 | TRPC4AP             | transient receptor potential cation channel, subfamily<br>C, member 4 associated protein                          |
| 0,97 | IGSF23              | immunoglobulin superfamily, member 23                                                                             |

|      |          |                                                                                                                                                                                                                                                                                                                                                                                                                                                                                                                                                                                                                                                                                                                                                                                                                |
|------|----------|----------------------------------------------------------------------------------------------------------------------------------------------------------------------------------------------------------------------------------------------------------------------------------------------------------------------------------------------------------------------------------------------------------------------------------------------------------------------------------------------------------------------------------------------------------------------------------------------------------------------------------------------------------------------------------------------------------------------------------------------------------------------------------------------------------------|
| 0,97 | HDGFRP2  | hepatoma-derived growth factor-related protein 2;<br>Hepatoma-derived growth factor-related protein 2<br>[Source:UniProtKB/Swiss-Prot;Acc:Q7Z4V5];<br>Salzman2013 ANNOTATED, CDS, coding, OVCODE,<br>OVEXON, UTR5 best transcript NM_001001520;<br>Salzman2013 ANNOTATED, CDS, coding, OVCODE,<br>OVERLAPTX, OVEXON, UTR3, UTR5 best<br>transcript NM_001001520; Salzman2013<br>ANNOTATED, CDS, coding, INTERNAL, OVCODE,<br>OVEXON best transcript NM_001001520;<br>Salzman2013 ALT_ACCEPTOR, CDS, coding,<br>INTERNAL, intronic, OVCODE, OVEXON best<br>transcript NM_001001520; Salzman2013<br>ANNOTATED, CDS, coding, OVCODE,<br>OVERLAPTX, OVEXON, UTR3 best transcript<br>NM_001001520; Salzman2013 ALT_DONOR, CDS,<br>coding, INTERNAL, OVCODE, OVERLAPTX,<br>OVEXON, UTR3 best transcript NM_001001520 |
| 0,97 | HNRNPF   | heterogeneous nuclear ribonucleoprotein F                                                                                                                                                                                                                                                                                                                                                                                                                                                                                                                                                                                                                                                                                                                                                                      |
| 0,97 | CD207    | CD207 molecule, langerin                                                                                                                                                                                                                                                                                                                                                                                                                                                                                                                                                                                                                                                                                                                                                                                       |
| 0,97 | TSPAN32  | tetraspanin 32                                                                                                                                                                                                                                                                                                                                                                                                                                                                                                                                                                                                                                                                                                                                                                                                 |
| 0,97 | EPHB1    | EPH receptor B1                                                                                                                                                                                                                                                                                                                                                                                                                                                                                                                                                                                                                                                                                                                                                                                                |
| 0,97 | OR1L6    | olfactory receptor, family 1, subfamily L, member 6                                                                                                                                                                                                                                                                                                                                                                                                                                                                                                                                                                                                                                                                                                                                                            |
| 0,97 | GPHN     | gephyrin                                                                                                                                                                                                                                                                                                                                                                                                                                                                                                                                                                                                                                                                                                                                                                                                       |
| 0,97 | AHI1     | Abelson helper integration site 1                                                                                                                                                                                                                                                                                                                                                                                                                                                                                                                                                                                                                                                                                                                                                                              |
| 0,97 | NUBPL    | nucleotide binding protein-like                                                                                                                                                                                                                                                                                                                                                                                                                                                                                                                                                                                                                                                                                                                                                                                |
| 0,97 | OR10J3   | olfactory receptor, family 10, subfamily J, member 3                                                                                                                                                                                                                                                                                                                                                                                                                                                                                                                                                                                                                                                                                                                                                           |
| 0,97 | BPNT1    | 3(2), 5-bisphosphate nucleotidase 1                                                                                                                                                                                                                                                                                                                                                                                                                                                                                                                                                                                                                                                                                                                                                                            |
| 0,97 | TRIM56   | tripartite motif containing 56                                                                                                                                                                                                                                                                                                                                                                                                                                                                                                                                                                                                                                                                                                                                                                                 |
| 0,97 | BUB3     | BUB3 mitotic checkpoint protein                                                                                                                                                                                                                                                                                                                                                                                                                                                                                                                                                                                                                                                                                                                                                                                |
| 0,97 | SCARA3   | scavenger receptor class A, member 3                                                                                                                                                                                                                                                                                                                                                                                                                                                                                                                                                                                                                                                                                                                                                                           |
| 0,97 | HEATR1   | HEAT repeat containing 1                                                                                                                                                                                                                                                                                                                                                                                                                                                                                                                                                                                                                                                                                                                                                                                       |
| 0,97 | CAMSAP3  | calmodulin regulated spectrin-associated protein<br>family, member 3                                                                                                                                                                                                                                                                                                                                                                                                                                                                                                                                                                                                                                                                                                                                           |
| 0,97 | CETP     | cholesteryl ester transfer protein, plasma                                                                                                                                                                                                                                                                                                                                                                                                                                                                                                                                                                                                                                                                                                                                                                     |
| 0,97 | TMEM200B | transmembrane protein 200B                                                                                                                                                                                                                                                                                                                                                                                                                                                                                                                                                                                                                                                                                                                                                                                     |
| 0,97 | CALCB    | calcitonin-related polypeptide beta                                                                                                                                                                                                                                                                                                                                                                                                                                                                                                                                                                                                                                                                                                                                                                            |
| 0,97 | AAR2     | AAR2 splicing factor homolog                                                                                                                                                                                                                                                                                                                                                                                                                                                                                                                                                                                                                                                                                                                                                                                   |
| 0,97 | DAZAP1   | DAZ associated protein 1                                                                                                                                                                                                                                                                                                                                                                                                                                                                                                                                                                                                                                                                                                                                                                                       |
| 0,97 | ATG7     | autophagy related 7                                                                                                                                                                                                                                                                                                                                                                                                                                                                                                                                                                                                                                                                                                                                                                                            |
| 0,97 | ST8SIA1  | ST8 alpha-N-acetyl-neuraminide alpha-2,8-<br>sialyltransferase 1                                                                                                                                                                                                                                                                                                                                                                                                                                                                                                                                                                                                                                                                                                                                               |
| 0,97 | C7orf73  | chromosome 7 open reading frame 73                                                                                                                                                                                                                                                                                                                                                                                                                                                                                                                                                                                                                                                                                                                                                                             |
| 0,97 | RGS3     | regulator of G-protein signaling 3                                                                                                                                                                                                                                                                                                                                                                                                                                                                                                                                                                                                                                                                                                                                                                             |
| 0,97 | GABRG3   | gamma-aminobutyric acid (GABA) A receptor, gamma<br>3                                                                                                                                                                                                                                                                                                                                                                                                                                                                                                                                                                                                                                                                                                                                                          |
| 0,97 | SLC39A5  | solute carrier family 39 (zinc transporter), member 5                                                                                                                                                                                                                                                                                                                                                                                                                                                                                                                                                                                                                                                                                                                                                          |
| 0,97 | TMEM14A  | transmembrane protein 14A                                                                                                                                                                                                                                                                                                                                                                                                                                                                                                                                                                                                                                                                                                                                                                                      |
| 0,97 | LRPAP1   | LDL receptor related protein associated protein 1                                                                                                                                                                                                                                                                                                                                                                                                                                                                                                                                                                                                                                                                                                                                                              |
| 0,97 | IRF2BP2  | interferon regulatory factor 2 binding protein 2                                                                                                                                                                                                                                                                                                                                                                                                                                                                                                                                                                                                                                                                                                                                                               |

|      |                                   |                                                                                                                                                                 |
|------|-----------------------------------|-----------------------------------------------------------------------------------------------------------------------------------------------------------------|
| 0,97 | NSFL1C                            | NSFL1 (p97) cofactor (p47)                                                                                                                                      |
| 0,97 | TCTE3                             | t-complex-associated-testis-expressed 3                                                                                                                         |
| 0,97 | ALDH7A1                           | aldehyde dehydrogenase 7 family, member A1                                                                                                                      |
| 0,97 | CRIP3                             | cysteine-rich protein 3                                                                                                                                         |
| 0,97 | C4orf45                           | chromosome 4 open reading frame 45                                                                                                                              |
| 0,97 | ALS2CL                            | ALS2 C-terminal like                                                                                                                                            |
| 0,97 | CTNNAL1                           | catenin (cadherin-associated protein), alpha-like 1                                                                                                             |
| 0,97 | RFX2                              | regulatory factor X, 2 (influences HLA class II expression)                                                                                                     |
| 0,97 | GPD1L                             | glycerol-3-phosphate dehydrogenase 1-like                                                                                                                       |
| 0,97 | MAPK13                            | mitogen-activated protein kinase 13                                                                                                                             |
| 0,97 | MCIDAS                            | multiciliate differentiation and DNA synthesis associated cell cycle protein                                                                                    |
| 0,97 | B3GNT9                            | UDP-GlcNAc:betaGal beta-1,3-N-acetylglucosaminyltransferase 9                                                                                                   |
| 0,97 | MAMDC4                            | MAM domain containing 4                                                                                                                                         |
| 0,97 | AMACR                             | alpha-methylacyl-CoA racemase                                                                                                                                   |
| 0,97 | OR4F29; OR4F3; OR4F16             | olfactory receptor, family 4, subfamily F, member 29; olfactory receptor, family 4, subfamily F, member 3; olfactory receptor, family 4, subfamily F, member 16 |
| 0,97 | OR4F16; OR4F29                    | olfactory receptor, family 4, subfamily F, member 16; olfactory receptor, family 4, subfamily F, member 29                                                      |
| 0,97 | PRRX2                             | paired related homeobox 2                                                                                                                                       |
| 0,97 | ICOSLG                            | inducible T-cell co-stimulator ligand                                                                                                                           |
| 0,97 | OR4X2                             | olfactory receptor, family 4, subfamily X, member 2 (gene/pseudogene)                                                                                           |
| 0,97 | CD8A                              | CD8a molecule                                                                                                                                                   |
| 0,97 | DGKD                              | diacylglycerol kinase, delta 130kDa                                                                                                                             |
| 0,97 | ANKHD1; EIF4EBP3; ANKHD1-EIF4EBP3 | ankyrin repeat and KH domain containing 1; eukaryotic translation initiation factor 4E binding protein 3; ANKHD1-EIF4EBP3 readthrough                           |
| 0,97 | UBA6                              | ubiquitin-like modifier activating enzyme 6                                                                                                                     |
| 0,97 | PARP10                            | poly(ADP-ribose) polymerase family member 10                                                                                                                    |
| 0,97 | GSE1                              | Gse1 coiled-coil protein                                                                                                                                        |
| 0,97 | ZNF254                            | zinc finger protein 254                                                                                                                                         |
| 0,97 | PHLDA3                            | pleckstrin homology-like domain, family A, member 3                                                                                                             |
| 0,97 | BVES                              | blood vessel epicardial substance                                                                                                                               |
| 0,97 | RAB11B                            | RAB11B, member RAS oncogene family                                                                                                                              |
| 0,97 | NDUFAF2                           | NADH dehydrogenase (ubiquinone) complex I, assembly factor 2                                                                                                    |
| 0,97 | NKIRAS2                           | Memczak2013 ANTISENSE, coding, INTERNAL, UTR3 best transcript NM_001001349                                                                                      |
| 0,97 | DEF8                              | differentially expressed in FDCP 8 homolog (mouse)                                                                                                              |
| 0,97 | CSE1L                             | CSE1 chromosome segregation 1-like (yeast)                                                                                                                      |
| 0,97 | CD200                             | CD200 molecule                                                                                                                                                  |
| 0,97 | SERINC5                           | serine incorporator 5                                                                                                                                           |
| 0,97 | DYRK1B                            | dual specificity tyrosine-(Y)-phosphorylation regulated kinase 1B                                                                                               |

|      |           |                                                                                    |
|------|-----------|------------------------------------------------------------------------------------|
| 0,97 | TIMM13    | translocase of inner mitochondrial membrane 13 homolog (yeast)                     |
| 0,97 | HCCS      | holocytochrome c synthase                                                          |
| 0,97 | ZBTB33    | zinc finger and BTB domain containing 33                                           |
| 0,97 | DNAJC19   | DnaJ (Hsp40) homolog, subfamily C, member 19                                       |
| 0,97 | B4GALT1   | UDP-Gal:betaGlcNAc beta 1,4- galactosyltransferase, polypeptide 1                  |
| 0,97 | HSD17B2   | hydroxysteroid (17-beta) dehydrogenase 2                                           |
| 0,97 | DEFB110   | defensin, beta 110                                                                 |
| 0,97 | OLIG1     | oligodendrocyte transcription factor 1                                             |
| 0,97 | CTBP1-AS2 | CTBP1 antisense RNA 2 (head to head)                                               |
| 0,97 | HIVEP3    | human immunodeficiency virus type I enhancer binding protein 3                     |
| 0,97 | PRAMEF7   | PRAME family member 7                                                              |
| 0,97 | SEMA7A    | semaphorin 7A, GPI membrane anchor (John Milton Hagen blood group)                 |
| 0,97 | CAPZA1    | capping protein (actin filament) muscle Z-line, alpha 1                            |
| 0,97 | PTGER2    | prostaglandin E receptor 2                                                         |
| 0,97 | TUBB8     | tubulin, beta 8 class VIII                                                         |
| 0,97 | MSI2      | musashi RNA binding protein 2                                                      |
| 0,97 | PGAM2     | phosphoglycerate mutase 2 (muscle)                                                 |
| 0,97 | SGSM1     | small G protein signaling modulator 1                                              |
| 0,97 | TAS2R13   | taste receptor, type 2, member 13                                                  |
| 0,97 | FAM227B   | family with sequence similarity 227, member B                                      |
| 0,97 | TMEM165   | transmembrane protein 165                                                          |
| 0,97 | PKP4      | plakophilin 4                                                                      |
| 0,97 | SBF2      | SET binding factor 2                                                               |
| 0,97 | ARID1B    | AT rich interactive domain 1B (SWI1-like)                                          |
| 0,97 | PTPRQ     | protein tyrosine phosphatase, receptor type, Q                                     |
| 0,97 | GSK3B     | glycogen synthase kinase 3 beta                                                    |
| 0,97 | PITRM1    | pitrilysin metalloproteinase 1                                                     |
| 0,97 | ZDHHC3    | zinc finger, DHHC-type containing 3                                                |
| 0,97 | BNIP3L    | BCL2/adenovirus E1B 19kDa interacting protein 3-like                               |
| 0,97 | KRT38     | keratin 38, type I                                                                 |
| 0,97 | ADCK4     | aarF domain containing kinase 4                                                    |
| 0,97 | NFKBIZ    | nuclear factor of kappa light polypeptide gene enhancer in B-cells inhibitor, zeta |
| 0,97 | CIDEA     | cell death-inducing DFFA-like effector a                                           |
| 0,97 | COPS6     | COP9 signalosome subunit 6                                                         |
| 0,97 | PCDHB2    | protocadherin beta 2                                                               |
| 0,97 | PRAMEF7   | PRAME family member 7                                                              |
| 0,97 | ACVR1     | activin A receptor type I                                                          |
| 0,97 | CLEC2A    | C-type lectin domain family 2, member A                                            |
| 0,97 | PTGDR     | prostaglandin D2 receptor (DP)                                                     |
| 0,97 | ZBTB38    | zinc finger and BTB domain containing 38                                           |
| 0,97 | OR51S1    | olfactory receptor, family 51, subfamily S, member 1                               |
| 0,97 | LRP6      | LDL receptor related protein 6                                                     |
| 0,97 | FDCSP     | follicular dendritic cell secreted protein                                         |

|      |                |                                                                                             |
|------|----------------|---------------------------------------------------------------------------------------------|
| 0,97 | ZNF721         | Salzman2013 ALT_ACCEPTOR, ALT_DONOR, coding, INTERNAL, intronic best transcript NM_133474   |
| 0,97 | MKRN1          | makorin ring finger protein 1                                                               |
| 0,97 | ARL6IP1        | ADP-ribosylation factor like GTPase 6 interacting protein 1                                 |
| 0,97 | DHX8           | DEAH (Asp-Glu-Ala-His) box polypeptide 8                                                    |
| 0,97 | WDR4           | WD repeat domain 4                                                                          |
| 0,97 | BAIAP2L1       | BAI1-associated protein 2-like 1                                                            |
| 0,97 | SLC25A6        | solute carrier family 25 (mitochondrial carrier; adenine nucleotide translocator), member 6 |
| 0,97 | NSRP1; MIR423  | nuclear speckle splicing regulatory protein 1; microRNA 423                                 |
| 0,97 | ELMO3          | engulfment and cell motility 3                                                              |
| 0,97 | MID1           | midline 1                                                                                   |
| 0,97 | FLVCR1         | feline leukemia virus subgroup C cellular receptor 1                                        |
| 0,97 | FHOD1          | formin homology 2 domain containing 1                                                       |
| 0,97 | FBXO47         | F-box protein 47                                                                            |
| 0,97 | COLCA1         | colorectal cancer associated 1                                                              |
| 0,97 | DCTN2          | dynactin 2 (p50)                                                                            |
| 0,97 | KRT79          | keratin 79, type II                                                                         |
| 0,97 | STEAP4         | STEAP family member 4                                                                       |
| 0,97 | TRABD2A        | TraB domain containing 2A                                                                   |
| 0,97 | PRKCSH         | protein kinase C substrate 80K-H                                                            |
| 0,97 | UCKL1; MIR1914 | uridine-cytidine kinase 1-like 1; microRNA 1914                                             |
| 0,97 | SEC14L6        | SEC14-like lipid binding 6                                                                  |
| 0,97 | GATC           | glutamyl-tRNA(Gln) amidotransferase, subunit C                                              |
| 0,97 | ASAP2          | ArfGAP with SH3 domain, ankyrin repeat and PH domain 2                                      |
| 0,97 | ZNF735         | zinc finger protein 735                                                                     |
| 0,97 | EMC2           | ER membrane protein complex subunit 2                                                       |
| 0,97 | SLC16A10       | solute carrier family 16 (aromatic amino acid transporter), member 10                       |
| 0,97 | C12orf29       | chromosome 12 open reading frame 29                                                         |
| 0,97 | FOXD4          | forkhead box D4                                                                             |
| 0,97 | USP35          | ubiquitin specific peptidase 35                                                             |
| 0,97 | KAT6B          | K(lysine) acetyltransferase 6B                                                              |
| 0,97 | ZNF33B         | zinc finger protein 33B                                                                     |
| 0,97 | RDX            | radixin                                                                                     |
| 0,97 | NSL1           | NSL1, MIS12 kinetochore complex component                                                   |
| 0,97 | PRKD3          | protein kinase D3                                                                           |
| 0,97 | ZKSCAN4        | zinc finger with KRAB and SCAN domains 4                                                    |
| 0,97 | NBPF9          | neuroblastoma breakpoint family, member 9                                                   |
| 0,97 | TNFAIP2        | tumor necrosis factor, alpha-induced protein 2                                              |
| 0,97 | MPDZ           | multiple PDZ domain protein                                                                 |
| 0,97 | OR51J1         | olfactory receptor, family 51, subfamily J, member 1 (gene/pseudogene)                      |
| 0,97 | LEFTY2         | left-right determination factor 2                                                           |
| 0,97 | OR10W1         | olfactory receptor, family 10, subfamily W, member 1                                        |

|      |          |                                                                                                 |
|------|----------|-------------------------------------------------------------------------------------------------|
| 0,97 | ICK      | intestinal cell (MAK-like) kinase                                                               |
| 0,97 | PTPN13   | protein tyrosine phosphatase, non-receptor type 13<br>(APO-1/CD95 (Fas)-associated phosphatase) |
| 0,97 | STPG1    | sperm-tail PG-rich repeat containing 1                                                          |
| 0,97 | PXDC1    | PX domain containing 1                                                                          |
| 0,97 | SIN3A    | SIN3 transcription regulator family member A                                                    |
| 0,97 | RGS10    | regulator of G-protein signaling 10                                                             |
| 0,97 | LRCH2    | leucine-rich repeats and calponin homology (CH)<br>domain containing 2                          |
| 0,97 | DDX54    | DEAD (Asp-Glu-Ala-Asp) box polypeptide 54                                                       |
| 0,97 | ITGA2B   | integrin alpha 2b                                                                               |
| 0,97 | APOBEC1  | apolipoprotein B mRNA editing enzyme, catalytic<br>polypeptide 1                                |
| 0,97 | ABHD5    | abhydrolase domain containing 5                                                                 |
| 0,97 | PQLC2    | PQ loop repeat containing 2                                                                     |
| 0,97 | ATG4D    | autophagy related 4D, cysteine peptidase                                                        |
| 0,97 | L2HGDH   | L-2-hydroxyglutarate dehydrogenase                                                              |
| 0,97 | ZBTB8A   | zinc finger and BTB domain containing 8A                                                        |
| 0,97 | RMI2     | RecQ mediated genome instability 2                                                              |
| 0,97 | TMPRSS3  | transmembrane protease, serine 3                                                                |
| 0,97 | C1orf52  | chromosome 1 open reading frame 52                                                              |
| 0,97 | ZDHHC3   | zinc finger, DHHC-type containing 3                                                             |
| 0,97 | MUC5B    | mucin 5B, oligomeric mucus/gel-forming                                                          |
| 0,97 | COBL     | cordon-bleu WH2 repeat protein                                                                  |
| 0,97 | H2AFV    | H2A histone family, member V                                                                    |
| 0,97 | C17orf47 | chromosome 17 open reading frame 47                                                             |
| 0,97 | PIK3CB   | phosphatidylinositol-4,5-bisphosphate 3-kinase,<br>catalytic subunit beta                       |
| 0,97 | KRTAP6-2 | keratin associated protein 6-2                                                                  |
| 0,97 | HMSD     | histocompatibility (minor) serpin domain containing                                             |
| 0,97 | MRPL48   | mitochondrial ribosomal protein L48                                                             |
| 0,97 | TUBGCP6  | tubulin, gamma complex associated protein 6                                                     |
| 0,97 | MYOM1    | myomesin 1                                                                                      |
| 0,97 | PARP4    | poly(ADP-ribose) polymerase family member 4                                                     |
| 0,97 | TMEM160  | transmembrane protein 160                                                                       |
| 0,97 | APOA1BP  | apolipoprotein A-I binding protein                                                              |
| 0,97 | ZNF780A  | zinc finger protein 780A                                                                        |
| 0,97 | CRB3     | crumbs family member 3                                                                          |
| 0,97 | TLX2     | T-cell leukemia homeobox 2                                                                      |
| 0,97 | CECR6    | cat eye syndrome chromosome region, candidate 6                                                 |
| 0,97 | ZNF546   | zinc finger protein 546                                                                         |
| 0,97 | TOP3A    | topoisomerase (DNA) III alpha                                                                   |
| 0,97 | PABPC4L  | poly(A) binding protein, cytoplasmic 4-like                                                     |
| 0,97 | ZNF536   | zinc finger protein 536                                                                         |
| 0,97 | EMILIN1  | elastin microfibril interfacier 1                                                               |
| 0,97 | CTSL3P   | cathepsin L family member 3, pseudogene                                                         |
| 0,97 | GTF3A    | general transcription factor IIIA                                                               |
| 0,97 | JMY      | junction mediating and regulatory protein, p53 cofactor                                         |
| 0,97 | CHD1     | chromodomain helicase DNA binding protein 1                                                     |

|      |             |                                                                              |
|------|-------------|------------------------------------------------------------------------------|
| 0,97 | APH1A       | APH1A gamma secretase subunit                                                |
| 0,97 | SFMBT2      | Scm-like with four mbt domains 2                                             |
| 0,97 | TRAFD1      | TRAF-type zinc finger domain containing 1                                    |
| 0,97 | RPS23       | ribosomal protein S23                                                        |
| 0,97 | SIGLEC16    | sialic acid binding Ig-like lectin 16 (gene/pseudogene)                      |
| 0,97 | HSF4; FBXL8 | heat shock transcription factor 4; F-box and leucine-rich repeat protein 8   |
| 0,97 | CARD10      | caspase recruitment domain family, member 10                                 |
| 0,97 | OR13C3      | olfactory receptor, family 13, subfamily C, member 3                         |
| 0,97 | DNAI1       | dynein, axonemal, intermediate chain 1                                       |
| 0,97 | COPS2       | COP9 signalosome subunit 2                                                   |
| 0,97 | SETDB1      | SET domain, bifurcated 1                                                     |
| 0,97 | LAMTOR5     | late endosomal/lysosomal adaptor, MAPK and MTOR activator 5                  |
| 0,97 | CXCR4       | chemokine (C-X-C motif) receptor 4                                           |
| 0,97 | DDX56       | DEAD (Asp-Glu-Ala-Asp) box helicase 56                                       |
| 0,97 | KLRB1       | killer cell lectin-like receptor subfamily B, member 1                       |
| 0,97 | HTRA3       | HtrA serine peptidase 3                                                      |
| 0,97 | DNAJB12     | DnaJ (Hsp40) homolog, subfamily B, member 12                                 |
| 0,97 | ICMT        | isoprenylcysteine carboxyl methyltransferase                                 |
| 0,97 | ACPI        | acid phosphatase 1, soluble                                                  |
| 0,97 | PRKRA       | protein kinase, interferon-inducible double stranded RNA dependent activator |
| 0,97 | KRTAP5-11   | keratin associated protein 5-11                                              |
| 0,97 | UBALD2      | UBA-like domain containing 2                                                 |
| 0,97 | RMND1       | required for meiotic nuclear division 1 homolog                              |
| 0,97 | PDILT       | protein disulfide isomerase-like, testis expressed                           |
| 0,97 | SP100       | SP100 nuclear antigen                                                        |
| 0,97 | MED7        | mediator complex subunit 7                                                   |
| 0,97 | NPIP9       | nuclear pore complex interacting protein family, member B9                   |
| 0,97 | ZIC2        | Zic family member 2                                                          |
| 0,97 | LIMD1       | LIM domains containing 1                                                     |
| 0,97 | PSG11       | pregnancy specific beta-1-glycoprotein 11                                    |
| 0,97 | HTRA4       | HtrA serine peptidase 4                                                      |
| 0,97 | NUP205      | nucleoporin 205kDa                                                           |
| 0,97 | AKT3        | v-akt murine thymoma viral oncogene homolog 3                                |
| 0,97 | GP9         | glycoprotein IX (platelet)                                                   |
| 0,97 | KCNG2       | potassium channel, voltage gated modifier subfamily G, member 2              |
| 0,97 | APLP2       | amyloid beta (A4) precursor-like protein 2                                   |
| 0,97 | KPNA7       | karyopherin alpha 7 (importin alpha 8)                                       |
| 0,97 | C17orf82    | chromosome 17 open reading frame 82                                          |
| 0,97 | TMTC1       | transmembrane and tetratricopeptide repeat containing 1                      |
| 0,97 | TMEM38A     | transmembrane protein 38A                                                    |
| 0,97 | GLI1        | GLI family zinc finger 1                                                     |
| 0,97 | BMP3        | bone morphogenetic protein 3                                                 |
| 0,97 | ARHGEF5     | Rho guanine nucleotide exchange factor 5                                     |
| 0,97 | SCAND1      | SCAN domain containing 1                                                     |

|      |                   |                                                                                           |
|------|-------------------|-------------------------------------------------------------------------------------------|
| 0,97 | KRTAP10-6         | keratin associated protein 10-6                                                           |
| 0,97 | DDX43             | DEAD (Asp-Glu-Ala-Asp) box polypeptide 43                                                 |
| 0,97 | FKBP9             | FK506 binding protein 9                                                                   |
| 0,97 | SLC22A10          | solute carrier family 22, member 10                                                       |
| 0,97 | RNF168            | ring finger protein 168, E3 ubiquitin protein ligase                                      |
| 0,97 | ICAM4             | intercellular adhesion molecule 4 (Landsteiner-Wiener blood group)                        |
| 0,97 | PPP2R1A           | protein phosphatase 2, regulatory subunit A, alpha                                        |
| 0,97 | SPN               | sialophorin                                                                               |
| 0,97 | FAM58A            | family with sequence similarity 58, member A                                              |
| 0,97 | MOSPD2            | motile sperm domain containing 2                                                          |
| 0,97 | HACL1             | 2-hydroxyacyl-CoA lyase 1                                                                 |
| 0,97 | ANAPC7            | anaphase promoting complex subunit 7                                                      |
| 0,97 | KIF15             | kinesin family member 15                                                                  |
| 0,97 | TRIM73            | tripartite motif containing 73                                                            |
| 0,97 | OR6S1             | olfactory receptor, family 6, subfamily S, member 1                                       |
| 0,97 | LARP4             | La ribonucleoprotein domain family, member 4                                              |
| 0,97 | SLC2A4RG          | SLC2A4 regulator                                                                          |
| 0,97 | ZNF624            | zinc finger protein 624                                                                   |
| 0,97 | LINC01578         | long intergenic non-protein coding RNA 1578                                               |
| 0,97 | ISLR              | immunoglobulin superfamily containing leucine-rich repeat                                 |
| 0,97 | TMEM240           | transmembrane protein 240                                                                 |
| 0,97 | TMUB1             | transmembrane and ubiquitin-like domain containing 1                                      |
| 0,97 | MMP9              | matrix metalloproteinase 9                                                                |
| 0,97 | PPP2CB            | protein phosphatase 2, catalytic subunit, beta isozyme                                    |
| 0,97 | BARX2             | BARX homeobox 2                                                                           |
| 0,97 | FXYP1             | FXYP domain containing ion transport regulator 1                                          |
| 0,97 | RYBP              | RING1 and YY1 binding protein                                                             |
| 0,97 | C1GALT1C1         | C1GALT1 specific chaperone 1                                                              |
| 0,97 | DDX53             | DEAD (Asp-Glu-Ala-Asp) box polypeptide 53                                                 |
| 0,97 | SURF4             | surfeit 4                                                                                 |
| 0,97 | MAP2K4;<br>MIR744 | mitogen-activated protein kinase kinase 4; microRNA 744                                   |
| 0,97 | TPSG1             | tryptase gamma 1                                                                          |
| 0,97 | LCE3B             | late cornified envelope 3B                                                                |
| 0,97 | CT45A6;<br>CT45A7 | cancer/testis antigen family 45, member A6;<br>cancer/testis antigen family 45, member A7 |
| 0,97 | SPAG9             | sperm associated antigen 9                                                                |
| 0,97 | OR52E6            | olfactory receptor, family 52, subfamily E, member 6                                      |
| 0,97 | SUMF1             | sulfatase modifying factor 1                                                              |
| 0,97 | DYRK1B            | dual specificity tyrosine-(Y)-phosphorylation regulated kinase 1B                         |
| 0,97 | ZBED5             | zinc finger, BED-type containing 5                                                        |
| 0,97 | KRTAP3-1          | keratin associated protein 3-1                                                            |
| 0,97 | CYTH3             | cytohesin 3                                                                               |
| 0,97 | ARID4B            | AT rich interactive domain 4B (RBP1-like)                                                 |
| 0,97 | DYNAP             | dynactin associated protein                                                               |
| 0,97 | KRTAP16-1         | keratin associated protein 16-1                                                           |

|      |                          |                                                                                                                                              |
|------|--------------------------|----------------------------------------------------------------------------------------------------------------------------------------------|
| 0,97 | UBB                      | ubiquitin B                                                                                                                                  |
| 0,97 | TMEM200A                 | transmembrane protein 200A                                                                                                                   |
| 0,97 | PRB3                     | proline-rich protein BstNI subfamily 3                                                                                                       |
| 0,97 | REXO4                    | REX4 homolog, 3'-5' exonuclease [Source:HGNC Symbol;Acc:HGNC:12820]                                                                          |
| 0,97 | UBE2W                    | ubiquitin-conjugating enzyme E2W (putative)                                                                                                  |
| 0,97 | AK5                      | adenylate kinase 5                                                                                                                           |
| 0,97 | PPP1R3D                  | protein phosphatase 1, regulatory subunit 3D                                                                                                 |
| 0,97 | JPH1                     | junctophilin 1                                                                                                                               |
| 0,97 | LINC00260                | long intergenic non-protein coding RNA 260                                                                                                   |
| 0,96 | SNORD89;<br>RNF149       | small nucleolar RNA, C/D box 89; ring finger protein 149                                                                                     |
| 0,96 | CDC42EP4                 | CDC42 effector protein (Rho GTPase binding) 4                                                                                                |
| 0,96 | LONP2                    | lon peptidase 2, peroxisomal                                                                                                                 |
| 0,96 | DOK2                     | docking protein 2                                                                                                                            |
| 0,96 | UTP23                    | UTP23, small subunit (SSU) processome component, homolog (yeast)                                                                             |
| 0,96 | CGB8                     | chorionic gonadotropin, beta polypeptide 8                                                                                                   |
| 0,96 | DPM1                     | dolichyl-phosphate mannosyltransferase polypeptide 1, catalytic subunit                                                                      |
| 0,96 | OR2J1                    | olfactory receptor, family 2, subfamily J, member 1 (gene/pseudogene)                                                                        |
| 0,96 | ITSN1                    | intersectin 1                                                                                                                                |
| 0,96 | SNRNPB                   | small nuclear ribonucleoprotein polypeptides B and B1                                                                                        |
| 0,96 | TEN1; CDK3;<br>TEN1-CDK3 | TEN1 CST complex subunit; cyclin-dependent kinase 3; TEN1-CDK3 readthrough (NMD candidate)                                                   |
| 0,96 | DHRS1                    | dehydrogenase/reductase (SDR family) member 1                                                                                                |
| 0,96 | TIMP4                    | TIMP metalloproteinase inhibitor 4                                                                                                           |
| 0,96 | PRDM2                    | PR domain containing 2, with ZNF domain                                                                                                      |
| 0,96 | HKR1                     | Memczak2013 ANTISENSE, CDS, coding, INTERNAL best transcript NM_181786                                                                       |
| 0,96 | ZMAT3                    | zinc finger, matrin-type 3                                                                                                                   |
| 0,96 | ZFP92                    | ZFP92 zinc finger protein                                                                                                                    |
| 0,96 | TRAM1L1                  | translocation associated membrane protein 1-like 1                                                                                           |
| 0,96 | CCZ1; CCZ1B              | CCZ1 homolog, vacuolar protein trafficking and biogenesis associated; CCZ1 homolog B, vacuolar protein trafficking and biogenesis associated |
| 0,96 | CAGE1                    | cancer antigen 1                                                                                                                             |
| 0,96 | CYP4F2                   | cytochrome P450, family 4, subfamily F, polypeptide 2                                                                                        |
| 0,96 | FOS                      | FBJ murine osteosarcoma viral oncogene homolog                                                                                               |
| 0,96 | TIMM23B                  | translocase of inner mitochondrial membrane 23 homolog B (yeast)                                                                             |
| 0,96 | XKR7                     | X-linked Kx blood group related 7                                                                                                            |
| 0,96 | NLGN3                    | neuroligin 3                                                                                                                                 |
| 0,96 | MCM3AP                   | minichromosome maintenance complex component 3 associated protein                                                                            |
| 0,96 | CCNYL1;<br>MIR4775       | cyclin Y like 1; microRNA 4775                                                                                                               |

|      |                       |                                                                                                                                                 |
|------|-----------------------|-------------------------------------------------------------------------------------------------------------------------------------------------|
| 0,96 | TCL1B; TCL6           | T-cell leukemia/lymphoma 1B; T-cell leukemia/lymphoma 6 (non-protein coding)                                                                    |
| 0,96 | SCRN1                 | secernin 1                                                                                                                                      |
| 0,96 | CCT3                  | chaperonin containing TCP1, subunit 3 (gamma)                                                                                                   |
| 0,96 | CAT                   | Memczak2013 ANTISENSE, CDS, coding, INTERNAL, UTR3 best transcript NM_001752                                                                    |
| 0,96 | LCMT2                 | leucine carboxyl methyltransferase 2                                                                                                            |
| 0,96 | RABL3                 | RAB, member of RAS oncogene family-like 3                                                                                                       |
| 0,96 | RGS9BP                | regulator of G protein signaling 9 binding protein                                                                                              |
| 0,96 | RHOD                  | ras homolog family member D                                                                                                                     |
| 0,96 | NABP2                 | nucleic acid binding protein 2                                                                                                                  |
| 0,96 | LSM6                  | Transcript Identified by AceView, Entrez Gene ID(s) 11157                                                                                       |
| 0,96 | GJA4                  | gap junction protein alpha 4                                                                                                                    |
| 0,96 | ZWILCH                | zwilch kinetochore protein                                                                                                                      |
| 0,96 | CMPK2                 | cytidine monophosphate (UMP-CMP) kinase 2, mitochondrial                                                                                        |
| 0,96 | SLC12A4               | solute carrier family 12 (potassium/chloride transporter), member 4                                                                             |
| 0,96 | GPR107                | G protein-coupled receptor 107                                                                                                                  |
| 0,96 | CNTD2                 | cyclin N-terminal domain containing 2                                                                                                           |
| 0,96 | STOML2                | stomatin (EPB72)-like 2                                                                                                                         |
| 0,96 | S1PR4                 | sphingosine-1-phosphate receptor 4                                                                                                              |
| 0,96 | KIF13A                | kinesin family member 13A                                                                                                                       |
| 0,96 | SSX8                  | synovial sarcoma, X breakpoint 8                                                                                                                |
| 0,96 | TARDBP                | TAR DNA binding protein                                                                                                                         |
| 0,96 | PLA2G4F               | phospholipase A2, group IVF                                                                                                                     |
| 0,96 | CCDC85B               | coiled-coil domain containing 85B                                                                                                               |
| 0,96 | ZC3H7A                | zinc finger CCCH-type containing 7A                                                                                                             |
| 0,96 | SLC1A5                | solute carrier family 1 (neutral amino acid transporter), member 5                                                                              |
| 0,96 | CGRRF1                | cell growth regulator with ring finger domain 1                                                                                                 |
| 0,96 | TPK1                  | thiamin pyrophosphokinase 1                                                                                                                     |
| 0,96 | HLCS                  | holocarboxylase synthetase (biotin-(propionyl-CoA-carboxylase (ATP-hydrolysing)) ligase)                                                        |
| 0,96 | FASTK                 | Fas-activated serine/threonine kinase                                                                                                           |
| 0,96 | MYO1F                 | Jeck2013 ANTISENSE, CDS, coding, INTERNAL, intronic, OVCODE, OVEXON best transcript NM_012335                                                   |
| 0,96 | ADIRF; AGAP11; BMS1P3 | adipogenesis regulatory factor; ankyrin repeat and GTPase domain Arf GTPase activating protein 11; BMS1 ribosome biogenesis factor pseudogene 3 |
| 0,96 | HDAC6                 | histone deacetylase 6                                                                                                                           |
| 0,96 | MGAM                  | maltase-glucoamylase                                                                                                                            |
| 0,96 | SERPINA3              | serpin peptidase inhibitor, clade A (alpha-1 antiproteinase, antitrypsin), member 3                                                             |
| 0,96 | FLVCR2                | feline leukemia virus subgroup C cellular receptor family, member 2                                                                             |
| 0,96 | STK39                 | serine threonine kinase 39                                                                                                                      |
| 0,96 | INTS3                 | integrator complex subunit 3                                                                                                                    |
| 0,96 | HEXA                  | hexosaminidase A (alpha polypeptide)                                                                                                            |

|      |                    |                                                                               |
|------|--------------------|-------------------------------------------------------------------------------|
| 0,96 | LIMA1              | LIM domain and actin binding 1                                                |
| 0,96 | ATP5H              | ATP synthase, H <sup>+</sup> transporting, mitochondrial Fo complex subunit D |
| 0,96 | ETFA               | electron-transfer-flavoprotein, alpha polypeptide                             |
| 0,96 | TMEM222            | transmembrane protein 222                                                     |
| 0,96 | DDX52              | DEAD (Asp-Glu-Ala-Asp) box polypeptide 52                                     |
| 0,96 | RGS20              | regulator of G-protein signaling 20                                           |
| 0,96 | THOC2              | THO complex 2                                                                 |
| 0,96 | POFUT1;<br>MIR1825 | protein O-fucosyltransferase 1; microRNA 1825                                 |
| 0,96 | FRMPD2             | FERM and PDZ domain containing 2                                              |
| 0,96 | LINGO1             | leucine rich repeat and Ig domain containing 1                                |
| 0,96 | PI4KAP2            | phosphatidylinositol 4-kinase, catalytic, alpha pseudogene 2                  |
| 0,96 | OR13C2             | olfactory receptor, family 13, subfamily C, member 2                          |
| 0,96 | GRB2               | growth factor receptor bound protein 2                                        |
| 0,96 | RASGRP2            | RAS guanyl releasing protein 2 (calcium and DAG-regulated)                    |
| 0,96 | KRT20              | keratin 20, type I                                                            |
| 0,96 | ABHD15             | abhydrolase domain containing 15                                              |
| 0,96 | SCGB1D1            | secretoglobin, family 1D, member 1                                            |
| 0,96 | YY1AP1             | YY1 associated protein 1                                                      |
| 0,96 | RPS10              | ribosomal protein S10                                                         |
| 0,96 | CENPM              | centromere protein M                                                          |
| 0,96 | POLD3              | polymerase (DNA-directed), delta 3, accessory subunit                         |
| 0,96 | SLFNL1             | schlafen like 1                                                               |
| 0,96 | ITPKB              | inositol-trisphosphate 3-kinase B                                             |
| 0,96 | INPP5D             | inositol polyphosphate-5-phosphatase D                                        |
| 0,96 | COQ9               | coenzyme Q9                                                                   |
| 0,96 | KRT18              | keratin 18, type I                                                            |
| 0,96 | TRIM7              | tripartite motif containing 7                                                 |
| 0,96 | RSAD2              | radical S-adenosyl methionine domain containing 2                             |
| 0,96 | OPRL1              | opiate receptor-like 1                                                        |
| 0,96 | PHF13              | PHD finger protein 13                                                         |
| 0,96 | MED13              | mediator complex subunit 13                                                   |
| 0,96 | TIGD4              | tigger transposable element derived 4                                         |
| 0,96 | WDYHV1             | WDYHV motif containing 1                                                      |
| 0,96 | TCF25              | transcription factor 25 (basic helix-loop-helix)                              |
| 0,96 | CTSL               | cathepsin L                                                                   |
| 0,96 | DPY19L4            | dpy-19-like 4 (C. elegans)                                                    |
| 0,96 | LRIG1              | leucine-rich repeats and immunoglobulin-like domains 1                        |
| 0,96 | S100A4             | S100 calcium binding protein A4                                               |
| 0,96 | UBR3               | Transcript Identified by AceView, Entrez Gene ID(s) 130507                    |
| 0,96 | HIPK4              | homeodomain interacting protein kinase 4                                      |
| 0,96 | RPS7               | ribosomal protein S7                                                          |
| 0,96 | ZDHHC3             | zinc finger, DHHC-type containing 3                                           |
| 0,96 | MTF1               | metal-regulatory transcription factor 1                                       |

|      |                           |                                                                                                        |
|------|---------------------------|--------------------------------------------------------------------------------------------------------|
| 0,96 | KLK13                     | kallikrein related peptidase 13                                                                        |
| 0,96 | CNTROB                    | centrobin, centrosomal BRCA2 interacting protein                                                       |
| 0,96 | TNFRSF25                  | tumor necrosis factor receptor superfamily, member 25                                                  |
| 0,96 | NTPCR                     | nucleoside-triphosphatase, cancer-related                                                              |
| 0,96 | PPARD                     | peroxisome proliferator-activated receptor delta                                                       |
| 0,96 | DBNDD2                    | dysbindin (dystrobrevin binding protein 1) domain containing 2                                         |
| 0,96 | SDHB                      | succinate dehydrogenase complex subunit B, iron sulfur (Ip)                                            |
| 0,96 | LMO3                      | LIM domain only 3 (rhombotin-like 2)                                                                   |
| 0,96 | RPS15A                    | ribosomal protein S15a                                                                                 |
| 0,96 | SERPINB2                  | serpin peptidase inhibitor, clade B (ovalbumin), member 2                                              |
| 0,96 | PIP                       | prolactin-induced protein                                                                              |
| 0,96 | SOS1                      | SOS Ras/Rac guanine nucleotide exchange factor 1                                                       |
| 0,96 | CDRT15                    | CMT1A duplicated region transcript 15                                                                  |
| 0,96 | RBAK; RBAK-RBAKDN; RBAKDN | RB-associated KRAB zinc finger; RBAK-RBAKDN readthrough; RBAK downstream neighbor (non-protein coding) |
| 0,96 | DAXX                      | death-domain associated protein                                                                        |
| 0,96 | PER1; MIR6883             | period circadian clock 1; microRNA 6883                                                                |
| 0,96 | SMPD1                     | sphingomyelin phosphodiesterase 1, acid lysosomal                                                      |
| 0,96 | DDAH1                     | dimethylarginine dimethylaminohydrolase 1                                                              |
| 0,96 | MAP1LC3B2                 | microtubule-associated protein 1 light chain 3 beta 2                                                  |
| 0,96 | EML5                      | Transcript Identified by AceView, Entrez Gene ID(s) 161436                                             |
| 0,96 | ICE1                      | interactor of little elongation complex ELL subunit 1                                                  |
| 0,96 | RPL7                      | ribosomal protein L7                                                                                   |
| 0,96 | HSF1                      | heat shock transcription factor 1                                                                      |
| 0,96 | MCMDC2                    | minichromosome maintenance domain containing 2                                                         |
| 0,96 | ATAD1                     | ATPase family, AAA domain containing 1                                                                 |
| 0,96 | SLC1A6                    | solute carrier family 1 (high affinity aspartate/glutamate transporter), member 6                      |
| 0,96 | GGCX                      | gamma-glutamyl carboxylase                                                                             |
| 0,96 | TTC31                     | tetratricopeptide repeat domain 31                                                                     |
| 0,96 | TIMELESS                  | timeless circadian clock                                                                               |
| 0,96 | RPL24                     | ribosomal protein L24                                                                                  |
| 0,96 | PDZD3                     | PDZ domain containing 3                                                                                |
| 0,96 | ANKRD34C                  | ankyrin repeat domain 34C                                                                              |
| 0,96 | IARS2                     | isoleucyl-tRNA synthetase 2, mitochondrial                                                             |
| 0,96 | LSM4                      | LSM4 homolog, U6 small nuclear RNA and mRNA degradation associated                                     |
| 0,96 | CIAPIN1                   | cytokine induced apoptosis inhibitor 1                                                                 |
| 0,96 | CDY1B; CDY1               | chromodomain protein, Y-linked, 1B; chromodomain protein, Y-linked, 1                                  |
| 0,96 | TAS2R3                    | taste receptor, type 2, member 3                                                                       |
| 0,96 | HTR7                      | 5-hydroxytryptamine (serotonin) receptor 7, adenylate cyclase-coupled                                  |
| 0,96 | FAM81A                    | family with sequence similarity 81, member A                                                           |

|      |                     |                                                                                                                                                                                                                                                                                                                                                                           |
|------|---------------------|---------------------------------------------------------------------------------------------------------------------------------------------------------------------------------------------------------------------------------------------------------------------------------------------------------------------------------------------------------------------------|
| 0,96 | SNX17               | sorting nexin 17                                                                                                                                                                                                                                                                                                                                                          |
| 0,96 | TUFM; MIR4721       | Tu translation elongation factor, mitochondrial;<br>microRNA 4721                                                                                                                                                                                                                                                                                                         |
| 0,96 | DNASE2              | deoxyribonuclease II, lysosomal                                                                                                                                                                                                                                                                                                                                           |
| 0,96 | RHEBL1              | Ras homolog enriched in brain like 1                                                                                                                                                                                                                                                                                                                                      |
| 0,96 | PREX1               | Memczak2013 ALT_ACCEPTOR, ALT_DONOR,<br>coding, INTERNAL, intronic best transcript<br>NM_020820                                                                                                                                                                                                                                                                           |
| 0,96 | CRBN                | cereblon                                                                                                                                                                                                                                                                                                                                                                  |
| 0,96 | SAR1A               | secretion associated, Ras related GTPase 1A                                                                                                                                                                                                                                                                                                                               |
| 0,96 | OXR1                | oxidation resistance 1                                                                                                                                                                                                                                                                                                                                                    |
| 0,96 | MTMR1               | myotubularin related protein 1                                                                                                                                                                                                                                                                                                                                            |
| 0,96 | OLFM3               | olfactomedin 3                                                                                                                                                                                                                                                                                                                                                            |
| 0,96 | TMPRSS11A           | transmembrane protease, serine 11A                                                                                                                                                                                                                                                                                                                                        |
| 0,96 | TRAPPC4             | trafficking protein particle complex 4                                                                                                                                                                                                                                                                                                                                    |
| 0,96 | WIPF1               | WAS/WASL interacting protein family, member 1                                                                                                                                                                                                                                                                                                                             |
| 0,96 | WTAP                | Wilms tumor 1 associated protein                                                                                                                                                                                                                                                                                                                                          |
| 0,96 | ANXA3               | annexin A3                                                                                                                                                                                                                                                                                                                                                                |
| 0,96 | YKT6                | YKT6 v-SNARE homolog (S. cerevisiae)                                                                                                                                                                                                                                                                                                                                      |
| 0,96 | ACPT                | acid phosphatase, testicular                                                                                                                                                                                                                                                                                                                                              |
| 0,96 | SKIV2L              | SKI2 homolog, superkiller viralicidic activity 2-like                                                                                                                                                                                                                                                                                                                     |
| 0,96 | AK8                 | adenylate kinase 8                                                                                                                                                                                                                                                                                                                                                        |
| 0,96 | FAM21A              | family with sequence similarity 21, member A                                                                                                                                                                                                                                                                                                                              |
| 0,96 | DNAJB6              | DnaJ (Hsp40) homolog, subfamily B, member 6                                                                                                                                                                                                                                                                                                                               |
| 0,96 | CENPP               | centromere protein P                                                                                                                                                                                                                                                                                                                                                      |
| 0,96 | NDUFA6              | NADH dehydrogenase (ubiquinone) 1 alpha<br>subcomplex, 6, 14kDa                                                                                                                                                                                                                                                                                                           |
| 0,96 | ZNF800              | zinc finger protein 800                                                                                                                                                                                                                                                                                                                                                   |
| 0,96 | EDF1                | endothelial differentiation-related factor 1                                                                                                                                                                                                                                                                                                                              |
| 0,96 | CTNNA1              | catenin (cadherin-associated protein), alpha 1                                                                                                                                                                                                                                                                                                                            |
| 0,96 | PSIP1               | PC4 and SFRS1 interacting protein 1                                                                                                                                                                                                                                                                                                                                       |
| 0,96 | SLC16A5             | solute carrier family 16 (monocarboxylate transporter),<br>member 5                                                                                                                                                                                                                                                                                                       |
| 0,96 | PCDH11Y             | protocadherin 11 Y-linked                                                                                                                                                                                                                                                                                                                                                 |
| 0,96 | TPST2               | tyrosylprotein sulfotransferase 2                                                                                                                                                                                                                                                                                                                                         |
| 0,96 | EMX1                | empty spiracles homeobox 1                                                                                                                                                                                                                                                                                                                                                |
| 0,96 | TSPY3;<br>LOC728395 | Homo sapiens testis specific protein, Y-linked 3,<br>mRNA (cDNA clone MGC:103998<br>IMAGE:30915406), complete cds.; Homo sapiens<br>similar to testis specific protein, Y-linked 1, mRNA<br>(cDNA clone MGC:150413 IMAGE:40120433),<br>complete cds.; Homo sapiens testis specific protein, Y-<br>linked 3, mRNA (cDNA clone MGC:150414<br>IMAGE:40120435), complete cds. |
| 0,96 | VSIG4               | V-set and immunoglobulin domain containing 4                                                                                                                                                                                                                                                                                                                              |
| 0,96 | ZP1                 | zona pellucida glycoprotein 1 (sperm receptor)                                                                                                                                                                                                                                                                                                                            |
| 0,96 | SOX7                | SRY box 7                                                                                                                                                                                                                                                                                                                                                                 |
| 0,96 | TMEM41B             | transmembrane protein 41B                                                                                                                                                                                                                                                                                                                                                 |
| 0,96 | MRPL50              | mitochondrial ribosomal protein L50                                                                                                                                                                                                                                                                                                                                       |
| 0,96 | SLC35G3             | solute carrier family 35, member G3                                                                                                                                                                                                                                                                                                                                       |

|      |                                |                                                                                                                                 |
|------|--------------------------------|---------------------------------------------------------------------------------------------------------------------------------|
| 0,96 | TMEM63C                        | transmembrane protein 63C                                                                                                       |
| 0,96 | MTHFS                          | 5,10-methenyltetrahydrofolate synthetase (5-formyltetrahydrofolate cyclo-ligase)                                                |
| 0,96 | MRM1                           | mitochondrial rRNA methyltransferase 1                                                                                          |
| 0,96 | UTP18                          | UTP18 small subunit (SSU) processome component                                                                                  |
| 0,96 | AMBN                           | ameloblastin                                                                                                                    |
| 0,96 | GCM2                           | glial cells missing homolog 2 (Drosophila)                                                                                      |
| 0,96 | FAM212A                        | family with sequence similarity 212, member A                                                                                   |
| 0,96 | PIK3C2B                        | phosphatidylinositol-4-phosphate 3-kinase, catalytic subunit type 2 beta                                                        |
| 0,96 | UGT2A2;<br>UGT2A1              | UDP glucuronosyltransferase 2 family, polypeptide A2;<br>UDP glucuronosyltransferase 2 family, polypeptide A1,<br>complex locus |
| 0,96 | PTP4A3                         | protein tyrosine phosphatase type IVA, member 3                                                                                 |
| 0,96 | CCND3                          | Memczak2013 ALT_ACCEPTOR, ALT_DONOR,<br>coding, INTERNAL, intronic best transcript<br>NM_001136017                              |
| 0,96 | FBXO11                         | F-box protein 11                                                                                                                |
| 0,96 | RASA4B; RASA4                  | RAS p21 protein activator 4B; RAS p21 protein<br>activator 4                                                                    |
| 0,96 | CNTNAP3                        | contactin associated protein-like 3                                                                                             |
| 0,96 | LPCAT4                         | lysophosphatidylcholine acyltransferase 4                                                                                       |
| 0,96 | SRGAP2C                        | SLIT-ROBO Rho GTPase activating protein 2C                                                                                      |
| 0,96 | OR52B6                         | olfactory receptor, family 52, subfamily B, member 6                                                                            |
| 0,96 | GLRA1                          | glycine receptor alpha 1                                                                                                        |
| 0,96 | C9orf129                       | chromosome 9 open reading frame 129                                                                                             |
| 0,96 | C1orf111                       | chromosome 1 open reading frame 111                                                                                             |
| 0,96 | C1orf216                       | chromosome 1 open reading frame 216                                                                                             |
| 0,96 | STX3                           | syntaxin 3                                                                                                                      |
| 0,96 | RNASEL                         | ribonuclease L (2,5-oligoadenylate synthetase-<br>dependent)                                                                    |
| 0,96 | GGTLC2                         | gamma-glutamyltransferase light chain 2                                                                                         |
| 0,96 | LOC101928841;<br>RP11-102K13.5 | collagen alpha-1(II) chain-like; novel transcript                                                                               |
| 0,96 | CSF3R                          | colony stimulating factor 3 receptor                                                                                            |
| 0,96 | USP17L4                        | ubiquitin specific peptidase 17-like family member 4                                                                            |
| 0,96 | SLC20A1                        | solute carrier family 20 (phosphate transporter),<br>member 1                                                                   |
| 0,96 | DAO                            | D-amino-acid oxidase                                                                                                            |
| 0,96 | PNOC                           | prepronociceptin                                                                                                                |
| 0,96 | NCBP2                          | nuclear cap binding protein subunit 2                                                                                           |
| 0,96 | C20orf203                      | chromosome 20 open reading frame 203                                                                                            |
| 0,96 | CD37                           | CD37 molecule                                                                                                                   |
| 0,96 | EPHB2                          | EPH receptor B2                                                                                                                 |
| 0,96 | TRERF1                         | transcriptional regulating factor 1                                                                                             |
| 0,96 | COX17                          | COX17 cytochrome c oxidase copper chaperone                                                                                     |
| 0,96 | EBF1                           | early B-cell factor 1                                                                                                           |
| 0,96 | TRIM37                         | tripartite motif containing 37                                                                                                  |
| 0,96 | S100P                          | S100 calcium binding protein P                                                                                                  |
| 0,96 | RERE                           | arginine-glutamic acid dipeptide (RE) repeats                                                                                   |

|      |                                                                                |                                                                                                                                                                                   |
|------|--------------------------------------------------------------------------------|-----------------------------------------------------------------------------------------------------------------------------------------------------------------------------------|
| 0,96 | ATXN10                                                                         | ataxin 10                                                                                                                                                                         |
| 0,96 | PIK3R4                                                                         | phosphoinositide-3-kinase, regulatory subunit 4                                                                                                                                   |
| 0,96 | SIDT1                                                                          | SID1 transmembrane family, member 1                                                                                                                                               |
| 0,96 | UGT2B17                                                                        | UDP glucuronosyltransferase 2 family, polypeptide B17                                                                                                                             |
| 0,96 | REPS2                                                                          | RALBP1 associated Eps domain containing 2                                                                                                                                         |
| 0,96 | STUB1                                                                          | STIP1 homology and U-box containing protein 1, E3 ubiquitin protein ligase                                                                                                        |
| 0,96 | USP17L13                                                                       | ubiquitin specific peptidase 17-like family member 13                                                                                                                             |
| 0,96 | PEX10                                                                          | peroxisomal biogenesis factor 10                                                                                                                                                  |
| 0,96 | PTMS                                                                           | parathymosin                                                                                                                                                                      |
| 0,96 | U2AF1                                                                          | U2 small nuclear RNA auxiliary factor 1                                                                                                                                           |
| 0,96 | NAT6                                                                           | N-acetyltransferase 6 (GCN5-related)                                                                                                                                              |
| 0,96 | OR10A5                                                                         | olfactory receptor, family 10, subfamily A, member 5                                                                                                                              |
| 0,96 | MTRF1                                                                          | mitochondrial translational release factor 1                                                                                                                                      |
| 0,96 | FBXO3                                                                          | F-box protein 3                                                                                                                                                                   |
| 0,96 | TRAPPC12                                                                       | trafficking protein particle complex 12                                                                                                                                           |
| 0,96 | ZNF492                                                                         | zinc finger protein 492                                                                                                                                                           |
| 0,96 | EPHA4                                                                          | Transcript Identified by AceView, Entrez Gene ID(s) 2043                                                                                                                          |
| 0,96 | RPL41                                                                          | ribosomal protein L41                                                                                                                                                             |
| 0,96 | CDK5RAP2                                                                       | CDK5 regulatory subunit associated protein 2                                                                                                                                      |
| 0,96 | LOC103611081;<br>LOC100507431;<br>RP11-890B15.3;<br>RP11-890B15.2;<br>klerglaw | uncharacterized LOC103611081; uncharacterized LOC100507431; Transcript Identified by AceView; novel transcript                                                                    |
| 0,96 | EXOC4                                                                          | exocyst complex component 4                                                                                                                                                       |
| 0,96 | MFAP2                                                                          | microfibrillar associated protein 2                                                                                                                                               |
| 0,96 | SMG7                                                                           | SMG7 nonsense mediated mRNA decay factor                                                                                                                                          |
| 0,96 | ADIRF-AS1;<br>RP11-96C23.15;<br>MMRN2                                          | ADIRF antisense RNA 1 [Source:HGNC Symbol;Acc:HGNC:45127]; Transcript Identified by AceView, Entrez Gene ID(s) 79812; ADIRF antisense RNA 1; novel transcript, antisense to ADIRF |
| 0,96 | LPP                                                                            | LIM domain containing preferred translocation partner in lipoma                                                                                                                   |
| 0,96 | HACD1                                                                          | 3-hydroxyacyl-CoA dehydratase 1                                                                                                                                                   |
| 0,96 | ZDHHC3                                                                         | zinc finger, DHHC-type containing 3                                                                                                                                               |
| 0,96 | HEG1                                                                           | heart development protein with EGF-like domains 1                                                                                                                                 |
| 0,96 | TXLNGY                                                                         | taxilin gamma pseudogene, Y-linked                                                                                                                                                |
| 0,96 | C1orf61                                                                        | chromosome 1 open reading frame 61                                                                                                                                                |
| 0,96 | DZIP1                                                                          | Transcript Identified by AceView, Entrez Gene ID(s) 22873                                                                                                                         |
| 0,96 | CCDC40                                                                         | coiled-coil domain containing 40                                                                                                                                                  |
| 0,96 | ST3GAL1                                                                        | ST3 beta-galactoside alpha-2,3-sialyltransferase 1                                                                                                                                |
| 0,96 | PIK3CG                                                                         | Memczak2013 ANTISENSE, CDS, coding, INTERNAL best transcript NM_002649                                                                                                            |
| 0,96 | CCT6A                                                                          | chaperonin containing TCP1, subunit 6A (zeta 1)                                                                                                                                   |
| 0,96 | ZNF860                                                                         | zinc finger protein 860                                                                                                                                                           |
| 0,96 | CTAGE9                                                                         | CTAGE family, member 9                                                                                                                                                            |

|      |                          |                                                                                            |
|------|--------------------------|--------------------------------------------------------------------------------------------|
| 0,96 | TGM2                     | transglutaminase 2                                                                         |
| 0,96 | AQR                      | aquarius intron-binding spliceosomal factor                                                |
| 0,96 | CYC1                     | cytochrome c-1                                                                             |
| 0,96 | TMEM219                  | transmembrane protein 219                                                                  |
| 0,96 | LOC653653;<br>AC025048.1 | adaptor-related protein complex 1, sigma 2 subunit<br>pseudogene                           |
| 0,96 | ANKRD18A;<br>FAM95C      | ankyrin repeat domain 18A; family with sequence<br>similarity 95, member C                 |
| 0,96 | DPYSL2                   | dihydropyrimidinase-like 2                                                                 |
| 0,96 | ZMYND15                  | zinc finger, MYND-type containing 15                                                       |
| 0,96 | UBN2                     | ubinuclein 2                                                                               |
| 0,96 | KIAA0895                 | KIAA0895                                                                                   |
| 0,96 | PRRC2C                   | proline-rich coiled-coil 2C                                                                |
| 0,96 | ACADM                    | acyl-CoA dehydrogenase, C-4 to C-12 straight chain                                         |
| 0,96 | SERPINA1                 | serpin peptidase inhibitor, clade A (alpha-1<br>antiproteinase, antitrypsin), member 1     |
| 0,96 | CCL2                     | chemokine (C-C motif) ligand 2                                                             |
| 0,96 | RICTOR                   | RPTOR independent companion of MTOR, complex 2                                             |
| 0,96 | TGM4                     | transglutaminase 4                                                                         |
| 0,96 | TAF12                    | TAF12 RNA polymerase II, TATA box binding protein<br>(TBP)-associated factor, 20kDa        |
| 0,96 | GLT8D1                   | glycosyltransferase 8 domain containing 1                                                  |
| 0,96 | RAD18                    | RAD18 E3 ubiquitin protein ligase                                                          |
| 0,96 | SNX1                     | sorting nexin 1                                                                            |
| 0,96 | ERMP1                    | endoplasmic reticulum metalloproteinase 1                                                  |
| 0,96 | COG2                     | component of oligomeric golgi complex 2                                                    |
| 0,96 | BUB1B                    | BUB1 mitotic checkpoint serine/threonine kinase B                                          |
| 0,96 | DEAF1                    | DEAF1 transcription factor                                                                 |
| 0,96 | CALM3                    | calmodulin 3 (phosphorylase kinase, delta)                                                 |
| 0,96 | RAB11FIP2                | RAB11 family interacting protein 2 (class I)                                               |
| 0,96 | CKS1B                    | CDC28 protein kinase regulatory subunit 1B                                                 |
| 0,96 | MAD2L1                   | MAD2 mitotic arrest deficient-like 1 (yeast)                                               |
| 0,96 | CRYGD                    | crystallin gamma D                                                                         |
| 0,96 | SBK1                     | SH3 domain binding kinase 1                                                                |
| 0,96 | SZRD1                    | SUZ RNA binding domain containing 1                                                        |
| 0,96 | GNL3;<br>SNORD19B        | guanine nucleotide binding protein-like 3 (nucleolar);<br>small nucleolar RNA, C/D box 19B |
| 0,96 | FUT9                     | fucosyltransferase 9 (alpha (1,3) fucosyltransferase)                                      |
| 0,96 | TRIM10                   | tripartite motif containing 10                                                             |
| 0,96 | ZNF367                   | zinc finger protein 367                                                                    |
| 0,96 | SSTR2                    | somatostatin receptor 2                                                                    |
| 0,96 | ZNF322                   | zinc finger protein 322                                                                    |
| 0,96 | TTC8                     | tetratricopeptide repeat domain 8                                                          |
| 0,96 | HSPB1                    | heat shock 27kDa protein 1                                                                 |
| 0,96 | TSFM                     | Ts translation elongation factor, mitochondrial                                            |
| 0,96 | FKBP1A;<br>MIR6869       | FK506 binding protein 1A; microRNA 6869                                                    |
| 0,96 | TMEM50A                  | transmembrane protein 50A                                                                  |
| 0,96 | P2RX2                    | purinergic receptor P2X, ligand gated ion channel, 2                                       |

|      |                    |                                                                                                             |
|------|--------------------|-------------------------------------------------------------------------------------------------------------|
| 0,96 | TMC2               | transmembrane channel like 2                                                                                |
| 0,96 | PRKACA             | protein kinase, cAMP-dependent, catalytic, alpha                                                            |
| 0,96 | MRGPRD             | MAS-related GPR, member D                                                                                   |
| 0,96 | FFAR3              | free fatty acid receptor 3                                                                                  |
| 0,96 | ATP2A3             | ATPase, Ca++ transporting, ubiquitous                                                                       |
| 0,96 | MDGA1              | MAM domain containing glycosylphosphatidylinositol anchor 1                                                 |
| 0,96 | FRMPD2B;<br>FRMPD2 | FERM and PDZ domain containing 2B, pseudogene;<br>FERM and PDZ domain containing 2                          |
| 0,96 | ARPP19             | cAMP-regulated phosphoprotein 19kDa                                                                         |
| 0,96 | TSTA3              | tissue specific transplantation antigen P35B                                                                |
| 0,96 | ADAMTS9            | ADAM metalloproteinase with thrombospondin type 1 motif 9                                                   |
| 0,96 | WDR5B              | WD repeat domain 5B                                                                                         |
| 0,96 | CDHR2              | cadherin-related family member 2                                                                            |
| 0,96 | LRIT1              | leucine-rich repeat, immunoglobulin-like and transmembrane domains 1                                        |
| 0,96 | OR8U1; OR8U8       | olfactory receptor, family 8, subfamily U, member 1;<br>olfactory receptor, family 8, subfamily U, member 8 |
| 0,96 | UTP6               | UTP6, small subunit (SSU) processome component, homolog (yeast)                                             |
| 0,96 | KCNK12             | potassium channel, two pore domain subfamily K, member 12                                                   |
| 0,96 | INO80              | INO80 complex subunit                                                                                       |
| 0,96 | PODXL2             | podocalyxin-like 2                                                                                          |
| 0,96 | KPNA1              | Transcript Identified by AceView, Entrez Gene ID(s) 3836                                                    |
| 0,96 | CLIP1              | CAP-GLY domain containing linker protein 1                                                                  |
| 0,96 | KCNE2              | potassium channel, voltage gated subfamily E regulatory beta subunit 2                                      |
| 0,96 | TULP3              | tubby like protein 3                                                                                        |
| 0,96 | GADD45G            | growth arrest and DNA-damage-inducible, gamma                                                               |
| 0,96 | RP1                | retinitis pigmentosa 1 (autosomal dominant)                                                                 |
| 0,96 | EIF3F              | Eukaryotic translation initiation factor 3 subunit F [Source:UniProtKB/Swiss-Prot;Acc:O00303]               |
| 0,96 | TGFB1              | transforming growth factor, beta-induced, 68kDa                                                             |
| 0,96 | NDUFS2             | NADH dehydrogenase (ubiquinone) Fe-S protein 2, 49kDa (NADH-coenzyme Q reductase)                           |
| 0,96 | ASCC1              | activating signal cointegrator 1 complex subunit 1                                                          |
| 0,96 | ANKRD16            | ankyrin repeat domain 16                                                                                    |
| 0,96 | NVL                | nuclear VCP-like                                                                                            |
| 0,96 | SAFB               | scaffold attachment factor B                                                                                |
| 0,96 | NACA2              | nascent polypeptide-associated complex alpha subunit 2                                                      |
| 0,96 | AURKAIP1           | aurora kinase A interacting protein 1                                                                       |
| 0,96 | CHRNA2             | cholinergic receptor, nicotinic alpha 2                                                                     |
| 0,96 | LACTB2             | lactamase, beta 2                                                                                           |
| 0,96 | ZMPSTE24           | zinc metalloproteinase STE24                                                                                |
| 0,96 | C1orf100           | chromosome 1 open reading frame 100                                                                         |
| 0,96 | SYS1-DBNDD2        | SYS1-DBNDD2 readthrough (NMD candidate)                                                                     |

|      |          |                                                                                                                                  |
|------|----------|----------------------------------------------------------------------------------------------------------------------------------|
| 0,96 | TEX19    | testis expressed 19                                                                                                              |
| 0,96 | LYRM2    | LYR motif containing 2                                                                                                           |
| 0,96 | VAV2     | vav 2 guanine nucleotide exchange factor                                                                                         |
| 0,96 | sep-08   | sepin 8                                                                                                                          |
| 0,96 | ASF1A    | anti-silencing function 1A histone chaperone                                                                                     |
| 0,96 | RNF34    | ring finger protein 34, E3 ubiquitin protein ligase                                                                              |
| 0,96 | SYTL2    | synaptotagmin-like 2                                                                                                             |
| 0,96 | ANXA8    | annexin A8                                                                                                                       |
| 0,96 | HPGD     | hydroxyprostaglandin dehydrogenase 15-(NAD)                                                                                      |
| 0,96 | TAOK2    | TAO kinase 2                                                                                                                     |
| 0,96 | TOP1     | topoisomerase (DNA) I                                                                                                            |
| 0,96 | CACUL1   | CDK2-associated, cullin domain 1                                                                                                 |
| 0,96 | RASSF5   | Ras association (RalGDS/AF-6) domain family member 5                                                                             |
| 0,96 | NSF      | N-ethylmaleimide-sensitive factor                                                                                                |
| 0,96 | ZNF575   | zinc finger protein 575                                                                                                          |
| 0,96 | PRPF38B  | pre-mRNA processing factor 38B                                                                                                   |
| 0,96 | OPN1LW   | opsin 1 (cone pigments), long-wave-sensitive                                                                                     |
| 0,96 | TTC37    | tetratricopeptide repeat domain 37                                                                                               |
| 0,96 | POF1B    | premature ovarian failure, 1B                                                                                                    |
| 0,96 | ARHGAP8  | Rho GTPase activating protein 8                                                                                                  |
| 0,96 | INCENP   | inner centromere protein                                                                                                         |
| 0,96 | TECPR1   | tectonin beta-propeller repeat containing 1                                                                                      |
| 0,96 | POU3F4   | POU class 3 homeobox 4                                                                                                           |
| 0,96 | INPPL1   | inositol polyphosphate phosphatase-like 1                                                                                        |
| 0,96 | HTATSF1  | HIV-1 Tat specific factor 1                                                                                                      |
| 0,96 | UNC13D   | unc-13 homolog D (C. elegans)                                                                                                    |
| 0,96 | ATP2A1   | ATPase, Ca <sup>++</sup> transporting, cardiac muscle, fast twitch 1                                                             |
| 0,96 | STAU1    | staufen double-stranded RNA binding protein 1                                                                                    |
| 0,96 | COMMD9   | COMM domain containing 9                                                                                                         |
| 0,96 | HIST1H4I | histone cluster 1, H4i                                                                                                           |
| 0,96 | PRDX4    | peroxiredoxin 4                                                                                                                  |
| 0,96 | UPF1     | UPF1 regulator of nonsense transcripts homolog (yeast)                                                                           |
| 0,96 | MRPL39   | mitochondrial ribosomal protein L39                                                                                              |
| 0,96 | NXNL1    | nucleoredoxin-like 1                                                                                                             |
| 0,96 | FRY      | FRY microtubule binding protein                                                                                                  |
| 0,96 | PRUNE2   | prune homolog 2 (Drosophila)                                                                                                     |
| 0,96 | ACTRT2   | actin-related protein T2                                                                                                         |
| 0,96 | RPL41    | Synthetic construct Homo sapiens clone IMAGE:100063377, MGC:190767 ribosomal protein L41 (RPL41) mRNA, encodes complete protein. |
| 0,96 | TIGD2    | tigger transposable element derived 2                                                                                            |
| 0,96 | BPY2C    | basic charge, Y-linked, 2C                                                                                                       |
| 0,96 | PALM     | paralemmin                                                                                                                       |
| 0,96 | DUSP15   | dual specificity phosphatase 15                                                                                                  |
| 0,96 | CORIN    | corin, serine peptidase                                                                                                          |
| 0,96 | PABPC1L  | poly(A) binding protein, cytoplasmic 1-like                                                                                      |
| 0,96 | UFL1     | UFM1-specific ligase 1                                                                                                           |

|      |                          |                                                                                                   |
|------|--------------------------|---------------------------------------------------------------------------------------------------|
| 0,96 | STK33                    | serine/threonine kinase 33                                                                        |
| 0,96 | KRT80                    | keratin 80, type II                                                                               |
| 0,96 | HTT                      | huntingtin                                                                                        |
| 0,96 | MSTN                     | myostatin                                                                                         |
| 0,96 | ZNF197                   | zinc finger protein 197                                                                           |
| 0,96 | PBRM1                    | polybromo 1                                                                                       |
| 0,96 | NUF2                     | NUF2, NDC80 kinetochore complex component                                                         |
| 0,96 | LYPLA2                   | lysophospholipase II                                                                              |
| 0,96 | PHOSPHO1                 | phosphatase, orphan 1                                                                             |
| 0,96 | LOC101060389;<br>TBC1D3D | TBC1 domain family member-like; TBC1 domain family, member 3D [Source:HGNC Symbol;Acc:HGNC:28944] |
| 0,96 | PIN4                     | peptidylprolyl cis/trans isomerase, NIMA-interacting 4                                            |
| 0,96 | GADD45GIP1               | growth arrest and DNA-damage-inducible, gamma interacting protein 1                               |
| 0,96 | OR14I1                   | olfactory receptor, family 14, subfamily I, member 1                                              |
| 0,96 | OR10A3                   | olfactory receptor, family 10, subfamily A, member 3                                              |
| 0,96 | LPIN1; MIR548S           | lipin 1; microRNA 548s                                                                            |
| 0,96 | NPM3                     | nucleophosmin/nucleoplasmin 3                                                                     |
| 0,96 | IQCF3                    | Transcript Identified by AceView, Entrez Gene ID(s) 401067                                        |
| 0,96 | VANGL1                   | VANGL planar cell polarity protein 1                                                              |
| 0,96 | KLHL11                   | kelch-like family member 11                                                                       |
| 0,96 | C14orf142                | chromosome 14 open reading frame 142                                                              |
| 0,96 | TTC9C                    | tetratricopeptide repeat domain 9C                                                                |
| 0,96 | SORBS1                   | Transcript Identified by AceView, Entrez Gene ID(s) 10580                                         |
| 0,96 | NDUFA7                   | NADH dehydrogenase (ubiquinone) 1 alpha subcomplex, 7, 14.5kDa                                    |
| 0,96 | MRPS16                   | mitochondrial ribosomal protein S16                                                               |
| 0,96 | PDXDC1                   | pyridoxal-dependent decarboxylase domain containing 1                                             |
| 0,96 | TPGS1                    | tubulin polyglutamylase complex subunit 1                                                         |
| 0,96 | ZNF114                   | zinc finger protein 114                                                                           |
| 0,96 | CEACAM3                  | carcinoembryonic antigen-related cell adhesion molecule 3                                         |
| 0,96 | RAG2                     | recombination activating gene 2                                                                   |
| 0,96 | MAPK8                    | mitogen-activated protein kinase 8                                                                |
| 0,96 | PDSS1                    | prenyl (decaprenyl) diphosphate synthase, subunit 1                                               |
| 0,96 | HSPBAP1                  | HSPB (heat shock 27kDa) associated protein 1                                                      |
| 0,96 | CD200; RP11-90K6.1       | Transcript Identified by AceView, Entrez Gene ID(s) 4345; novel transcript                        |
| 0,96 | ZNF281                   | zinc finger protein 281                                                                           |
| 0,96 | FAM198A                  | family with sequence similarity 198, member A                                                     |
| 0,96 | ELMOD1                   | ELMO/CED-12 domain containing 1                                                                   |
| 0,96 | NOSIP                    | nitric oxide synthase interacting protein                                                         |
| 0,96 | KCNQ3                    | potassium channel, voltage gated KQT-like subfamily Q, member 3                                   |
| 0,96 | DBX2                     | developing brain homeobox 2                                                                       |

|      |                                    |                                                                                                         |
|------|------------------------------------|---------------------------------------------------------------------------------------------------------|
| 0,96 | PLPP1;<br>RNF138P1                 | phospholipid phosphatase 1; ring finger protein 138, E3 ubiquitin protein ligase pseudogene 1           |
| 0,96 | EBP                                | emopamil binding protein (sterol isomerase)                                                             |
| 0,96 | ZNF273                             | zinc finger protein 273                                                                                 |
| 0,96 | C1orf137                           | chromosome 1 open reading frame 137                                                                     |
| 0,96 | XYLT2                              | xylosyltransferase II                                                                                   |
| 0,96 | SRSF12                             | serine/arginine-rich splicing factor 12                                                                 |
| 0,96 | ENG                                | endoglin                                                                                                |
| 0,96 | ZNF780B                            | zinc finger protein 780B                                                                                |
| 0,96 | GNAT3                              | guanine nucleotide binding protein, alpha transducing 3                                                 |
| 0,96 | OR6A2                              | olfactory receptor, family 6, subfamily A, member 2                                                     |
| 0,96 | XPO7                               | exportin 7                                                                                              |
| 0,96 | RALY                               | RALY heterogeneous nuclear ribonucleoprotein                                                            |
| 0,96 | GRK6                               | G protein-coupled receptor kinase 6                                                                     |
| 0,96 | C2orf81                            | chromosome 2 open reading frame 81                                                                      |
| 0,96 | HIST1H3G                           | histone cluster 1, H3g                                                                                  |
| 0,96 | C19orf48;<br>SNORD88B;<br>SNORD88C | chromosome 19 open reading frame 48; small nucleolar RNA, C/D box 88B; small nucleolar RNA, C/D box 88C |
| 0,96 | FOXMI                              | forkhead box M1                                                                                         |
| 0,96 | PRSS27                             | protease, serine 27                                                                                     |
| 0,96 | THAP3                              | THAP domain containing, apoptosis associated protein 3                                                  |
| 0,96 | MOBP                               | myelin-associated oligodendrocyte basic protein                                                         |
| 0,96 | CFAP36                             | cilia and flagella associated protein 36                                                                |
| 0,96 | DDHD1                              | DDHD domain containing 1                                                                                |
| 0,96 | PGPEP1                             | pyroglutamyl-peptidase I                                                                                |
| 0,96 | C8orf49                            | chromosome 8 open reading frame 49                                                                      |
| 0,96 | FTSJ2                              | FtsJ RNA methyltransferase homolog 2 (E. coli)                                                          |
| 0,96 | EYA4                               | EYA transcriptional coactivator and phosphatase 4                                                       |
| 0,96 | RSRC1                              | arginine/serine-rich coiled-coil 1                                                                      |
| 0,96 | KRTAP21-2                          | keratin associated protein 21-2                                                                         |
| 0,96 | UBXN4                              | UBX domain protein 4                                                                                    |
| 0,96 | ZNF70                              | zinc finger protein 70                                                                                  |
| 0,96 | LACTBL1                            | lactamase, beta-like 1                                                                                  |
| 0,96 | EIF4E1B                            | eukaryotic translation initiation factor 4E family member 1B                                            |
| 0,96 | MDGA2                              | MAM domain containing glycosylphosphatidylinositol anchor 2                                             |
| 0,96 | SORCS1                             | sortilin-related VPS10 domain containing receptor 1                                                     |
| 0,96 | CACNA1I                            | calcium channel, voltage-dependent, T type, alpha 1I subunit                                            |
| 0,96 | PRDM14                             | PR domain containing 14                                                                                 |
| 0,96 | SLC33A1                            | solute carrier family 33 (acetyl-CoA transporter), member 1                                             |
| 0,96 | RIMS4                              | regulating synaptic membrane exocytosis 4                                                               |
| 0,96 | DBF4B                              | DBF4 zinc finger B                                                                                      |
| 0,96 | FAM71F1                            | family with sequence similarity 71, member F1                                                           |
| 0,96 | FOXN4                              | forkhead box N4                                                                                         |

|      |                     |                                                                                        |
|------|---------------------|----------------------------------------------------------------------------------------|
| 0,96 | C5orf64             | chromosome 5 open reading frame 64                                                     |
| 0,96 | LRRC8C              | leucine rich repeat containing 8 family, member C                                      |
| 0,96 | MAP1LC3B            | microtubule-associated protein 1 light chain 3 beta                                    |
| 0,96 | KHNYN               | KH and NYN domain containing                                                           |
| 0,96 | TALDO1              | transaldolase 1                                                                        |
| 0,96 | C16orf91            | chromosome 16 open reading frame 91                                                    |
| 0,96 | LMAN2               | lectin, mannose-binding 2                                                              |
| 0,96 | PRR27               | proline rich 27                                                                        |
| 0,96 | ENSA                | endosulfine alpha                                                                      |
| 0,96 | MIR22HG             | MIR22 host gene                                                                        |
| 0,96 | BTBD3               | BTB (POZ) domain containing 3                                                          |
| 0,96 | MGAT4C              | MGAT4 family, member C                                                                 |
| 0,96 | RPL14               | Transcript Identified by AceView, Entrez Gene ID(s)<br>9045                            |
| 0,96 | SYNGAP1;<br>MIR5004 | synaptic Ras GTPase activating protein 1; microRNA<br>5004                             |
| 0,96 | GPX8                | glutathione peroxidase 8 (putative)                                                    |
| 0,96 | HEMK1               | HemK methyltransferase family member 1                                                 |
| 0,96 | SLAIN1              | SLAIN motif family member 1                                                            |
| 0,96 | C19orf45            | chromosome 19 open reading frame 45                                                    |
| 0,96 | GTF2E1              | general transcription factor IIE subunit 1                                             |
| 0,96 | RSAD1               | radical S-adenosyl methionine domain containing 1                                      |
| 0,96 | GNG8                | guanine nucleotide binding protein (G protein), gamma<br>8                             |
| 0,96 | OR2AK2              | olfactory receptor, family 2, subfamily AK, member 2                                   |
| 0,96 | TLDC2               | TBC/LysM-associated domain containing 2                                                |
| 0,96 | PTGES2              | prostaglandin E synthase 2                                                             |
| 0,96 | ARID5B              | AT rich interactive domain 5B (MRF1-like)                                              |
| 0,96 | SLC7A9              | solute carrier family 7 (amino acid transporter light<br>chain, bo,+ system), member 9 |
| 0,96 | FAM96A              | family with sequence similarity 96, member A                                           |
| 0,96 | BTNL9               | butyrophilin-like 9                                                                    |
| 0,96 | PRMT3               | protein arginine methyltransferase 3                                                   |
| 0,96 | CKM                 | creatine kinase, muscle                                                                |
| 0,96 | FCER1A              | Fc fragment of IgE, high affinity I, receptor for; alpha<br>polypeptide                |
| 0,96 | ZDHHC20             | zinc finger, DHHC-type containing 20                                                   |
| 0,96 | NRXN1               | neurexin 1                                                                             |
| 0,96 | OR4D10              | olfactory receptor, family 4, subfamily D, member 10                                   |
| 0,96 | CD2AP               | CD2-associated protein                                                                 |
| 0,96 | PRH2                | proline-rich protein HaeIII subfamily 2                                                |
| 0,96 | ERLEC1              | endoplasmic reticulum lectin 1                                                         |
| 0,96 | TRMT1L              | tRNA methyltransferase 1 like                                                          |
| 0,96 | SCUBE1              | signal peptide, CUB domain, EGF-like 1                                                 |
| 0,96 | MYO3A               | myosin IIIA                                                                            |
| 0,96 | CORO2A              | coronin, actin binding protein, 2A                                                     |
| 0,96 | BRPF1               | bromodomain and PHD finger containing 1                                                |
| 0,96 | SOD1                | superoxide dismutase 1, soluble                                                        |
| 0,96 | ABCF1               | ATP binding cassette subfamily F member 1                                              |
| 0,96 | REC114              | REC114 meiotic recombination protein                                                   |

|      |                 |                                                                        |
|------|-----------------|------------------------------------------------------------------------|
| 0,96 | SRGAP2B         | SLIT-ROBO Rho GTPase activating protein 2B                             |
| 0,96 | PGK1            | phosphoglycerate kinase 1                                              |
| 0,96 | ZBTB9           | zinc finger and BTB domain containing 9                                |
| 0,96 | SLC26A8         | solute carrier family 26 (anion exchanger), member 8                   |
| 0,96 | SLC25A32        | solute carrier family 25 (mitochondrial folate carrier), member 32     |
| 0,96 | LRRC7           | leucine rich repeat containing 7                                       |
| 0,96 | LYRM1           | LYR motif containing 1                                                 |
| 0,96 | CD180           | CD180 molecule                                                         |
| 0,96 | ETS2            | v-ets avian erythroblastosis virus E26 oncogene homolog 2              |
| 0,96 | PAH             | phenylalanine hydroxylase                                              |
| 0,96 | PPM1G           | protein phosphatase, Mg <sup>2+</sup> /Mn <sup>2+</sup> dependent, 1G  |
| 0,96 | PSMG3           | proteasome (prosome, macropain) assembly chaperone 3                   |
| 0,96 | ZNF93           | zinc finger protein 93                                                 |
| 0,96 | CEP97           | Transcript Identified by AceView, Entrez Gene ID(s) 79598              |
| 0,96 | GYPB            | glycophorin B (MNS blood group)                                        |
| 0,96 | TIGAR           | TP53 induced glycolysis regulatory phosphatase                         |
| 0,96 | TPM2            | tropomyosin 2 (beta)                                                   |
| 0,96 | SYCP1           | synaptonemal complex protein 1                                         |
| 0,96 | C12orf42        | chromosome 12 open reading frame 42                                    |
| 0,96 | TBX19           | T-box 19                                                               |
| 0,96 | SDHA            | succinate dehydrogenase complex subunit A, flavoprotein (Fp)           |
| 0,96 | CIAO1           | cytosolic iron-sulfur assembly component 1                             |
| 0,96 | EGLN3           | egl-9 family hypoxia-inducible factor 3                                |
| 0,96 | PTPRN           | protein tyrosine phosphatase, receptor type, N                         |
| 0,96 | ITGB6           | integrin beta 6                                                        |
| 0,96 | UROS            | uroporphyrinogen III synthase                                          |
| 0,96 | SCARF2          | scavenger receptor class F, member 2                                   |
| 0,96 | SETD1B          | SET domain containing 1B                                               |
| 0,96 | AQP5            | aquaporin 5                                                            |
| 0,96 | LIPC            | lipase, hepatic                                                        |
| 0,96 | SRP14           | signal recognition particle 14kDa                                      |
| 0,96 | ABHD14A-ACY1    | ABHD14A-ACY1 readthrough                                               |
| 0,96 | CCZ1B           | CCZ1 homolog B, vacuolar protein trafficking and biogenesis associated |
| 0,96 | GPX4            | glutathione peroxidase 4                                               |
| 0,96 | RFESD           | Rieske (Fe-S) domain containing                                        |
| 0,96 | GABARAPL2       | GABA(A) receptor-associated protein like 2                             |
| 0,96 | PELI3           | pellino E3 ubiquitin protein ligase family member 3                    |
| 0,96 | GJA8            | gap junction protein alpha 8                                           |
| 0,96 | UHRF1           | ubiquitin-like with PHD and ring finger domains 1                      |
| 0,96 | RPS3A; SNORD73A | ribosomal protein S3A; small nucleolar RNA, C/D box 73A                |
| 0,96 | MZB1            | marginal zone B and B1 cell-specific protein                           |
| 0,96 | HIST1H2AJ       | histone cluster 1, H2aj                                                |

|      |                                                     |                                                                                                                                                            |
|------|-----------------------------------------------------|------------------------------------------------------------------------------------------------------------------------------------------------------------|
| 0,96 | PYGO2                                               | pygopus family PHD finger 2                                                                                                                                |
| 0,96 | GPRC6A                                              | G protein-coupled receptor, class C, group 6, member A                                                                                                     |
| 0,96 | ANKRD62                                             | ankyrin repeat domain 62                                                                                                                                   |
| 0,96 | FAM167B                                             | family with sequence similarity 167, member B                                                                                                              |
| 0,96 | NAP1L6                                              | nucleosome assembly protein 1-like 6                                                                                                                       |
| 0,96 | DTYMK                                               | deoxythymidylate kinase                                                                                                                                    |
| 0,96 | SMPX                                                | small muscle protein, X-linked                                                                                                                             |
| 0,96 | UBQLNL                                              | ubiquilin-like                                                                                                                                             |
| 0,96 | ZRANB1                                              | zinc finger, RAN-binding domain containing 1                                                                                                               |
| 0,96 | TFDP3                                               | transcription factor Dp family, member 3                                                                                                                   |
| 0,96 | RPS8; SNORD55;<br>SNORD46;<br>SNORD38A;<br>SNORD38B | ribosomal protein S8; small nucleolar RNA, C/D box 55; small nucleolar RNA, C/D box 46; small nucleolar RNA, C/D box 38A; small nucleolar RNA, C/D box 38B |
| 0,96 | TMEM154                                             | transmembrane protein 154                                                                                                                                  |
| 0,96 | S100A6                                              | S100 calcium binding protein A6                                                                                                                            |
| 0,96 | UBE2E3                                              | ubiquitin-conjugating enzyme E2E 3                                                                                                                         |
| 0,96 | CHCHD3                                              | coiled-coil-helix-coiled-coil-helix domain containing 3                                                                                                    |
| 0,96 | TMEM81                                              | transmembrane protein 81                                                                                                                                   |
| 0,96 | TGM1                                                | transglutaminase 1                                                                                                                                         |
| 0,96 | SEL1L3                                              | sel-1 suppressor of lin-12-like 3 (C. elegans)                                                                                                             |
| 0,96 | ABI3BP                                              | ABI family, member 3 (NESH) binding protein                                                                                                                |
| 0,96 | PHF2                                                | PHD finger protein 2                                                                                                                                       |
| 0,96 | CACNG8;<br>MIR935                                   | calcium channel, voltage-dependent, gamma subunit 8;<br>microRNA 935                                                                                       |
| 0,96 | MED31                                               | mediator complex subunit 31                                                                                                                                |
| 0,96 | ZNF74                                               | zinc finger protein 74                                                                                                                                     |
| 0,96 | DDX51                                               | DEAD (Asp-Glu-Ala-Asp) box polypeptide 51                                                                                                                  |
| 0,96 | C10orf126                                           | chromosome 10 open reading frame 126                                                                                                                       |
| 0,96 | INSM1                                               | insulinoma-associated 1                                                                                                                                    |
| 0,96 | IGSF21                                              | immunoglobulin superfamily, member 21                                                                                                                      |
| 0,96 | TLK1                                                | tousled-like kinase 1                                                                                                                                      |
| 0,96 | CHSY3                                               | chondroitin sulfate synthase 3                                                                                                                             |
| 0,96 | OR2V1                                               | olfactory receptor, family 2, subfamily V, member 1                                                                                                        |
| 0,96 | LEO1                                                | LEO1 homolog, Paf1/RNA polymerase II complex component                                                                                                     |
| 0,96 | CECR2                                               | cat eye syndrome chromosome region, candidate 2                                                                                                            |
| 0,96 | RANBP9                                              | RAN binding protein 9                                                                                                                                      |
| 0,96 | PPP2R5D                                             | protein phosphatase 2, regulatory subunit B, delta                                                                                                         |
| 0,96 | ADRA1B                                              | adrenoceptor alpha 1B                                                                                                                                      |
| 0,96 | ITGB1                                               | integrin beta 1                                                                                                                                            |
| 0,96 | CHRNA4                                              | cholinergic receptor, nicotinic alpha 4                                                                                                                    |
| 0,96 | PHF23                                               | PHD finger protein 23                                                                                                                                      |
| 0,96 | TDRKH                                               | tudor and KH domain containing                                                                                                                             |
| 0,96 | B3GALNT2                                            | beta-1,3-N-acetylgalactosaminyltransferase 2                                                                                                               |
| 0,96 | USP13                                               | ubiquitin specific peptidase 13 (isopeptidase T-3)                                                                                                         |

|      |               |                                                                                                              |
|------|---------------|--------------------------------------------------------------------------------------------------------------|
| 0,96 | PPP1R16B      | Transcript Identified by AceView, Entrez Gene ID(s)<br>26051                                                 |
| 0,96 | UGT8          | UDP glycosyltransferase 8                                                                                    |
| 0,96 | NCAPD2        | non-SMC condensin I complex subunit D2                                                                       |
| 0,96 | SLC16A4       | solute carrier family 16, member 4                                                                           |
| 0,96 | UPK2          | uroplakin 2                                                                                                  |
| 0,96 | APLN          | apelin                                                                                                       |
| 0,96 | EFNB2         | ephrin-B2                                                                                                    |
| 0,96 | OR1N1         | olfactory receptor, family 1, subfamily N, member 1                                                          |
| 0,96 | SGK3          | serum/glucocorticoid regulated kinase family, member<br>3                                                    |
| 0,96 | HP            | haptoglobin                                                                                                  |
| 0,96 | HBZ           | hemoglobin, zeta                                                                                             |
| 0,96 | HSBP1         | heat shock factor binding protein 1                                                                          |
| 0,96 | LRIF1         | ligand dependent nuclear receptor interacting factor 1                                                       |
| 0,96 | PRKD1         | protein kinase D1                                                                                            |
| 0,96 | DACT3         | dishevelled-binding antagonist of beta-catenin 3                                                             |
| 0,96 | ZNF888        | zinc finger protein 888                                                                                      |
| 0,96 | OR4F4; OR4F17 | olfactory receptor, family 4, subfamily F, member 4;<br>olfactory receptor, family 4, subfamily F, member 17 |
| 0,96 | HRH3          | histamine receptor H3                                                                                        |
| 0,96 | POLK          | polymerase (DNA directed) kappa                                                                              |
| 0,96 | HTRA3         | Transcript Identified by AceView, Entrez Gene ID(s)<br>94031                                                 |
| 0,96 | ZNF654        | zinc finger protein 654                                                                                      |
| 0,96 | B3GLCT        | beta 3-glucosyltransferase                                                                                   |
| 0,96 | OSR1          | odd-skipped related transcription factor 1                                                                   |
| 0,96 | L3MBTL3       | l(3)mbt-like 3 (Drosophila)                                                                                  |
| 0,96 | IL4R          | interleukin 4 receptor                                                                                       |
| 0,96 | RNF208        | ring finger protein 208                                                                                      |
| 0,96 | SURF4         | surfeit 4                                                                                                    |
| 0,96 | KRTAP9-2      | keratin associated protein 9-2                                                                               |
| 0,96 | ZNF658        | zinc finger protein 658                                                                                      |
| 0,96 | HMBS          | hydroxymethylbilane synthase                                                                                 |
| 0,96 | NCKIPSD       | NCK interacting protein with SH3 domain                                                                      |
| 0,96 | HIST2H2AB     | histone cluster 2, H2ab                                                                                      |
| 0,96 | DUSP16        | dual specificity phosphatase 16                                                                              |
| 0,96 | MCM4          | minichromosome maintenance complex component 4                                                               |
| 0,96 | LGALS12       | lectin, galactoside-binding, soluble, 12                                                                     |
| 0,96 | C4orf3        | chromosome 4 open reading frame 3                                                                            |

|      |                                                             |                                                                                                                                                                                                                                                                                                                                                                                                                                                                                                                                                                                                                                                                                                                      |
|------|-------------------------------------------------------------|----------------------------------------------------------------------------------------------------------------------------------------------------------------------------------------------------------------------------------------------------------------------------------------------------------------------------------------------------------------------------------------------------------------------------------------------------------------------------------------------------------------------------------------------------------------------------------------------------------------------------------------------------------------------------------------------------------------------|
| 0,96 | LOC389831;<br>TCONS_00030034;<br>TCONS_00030035; AC011043.1 | uncharacterized LOC389831; Salzman2013 ANNOTATED, CDS, coding, OVCODE, OVEXON, UTR3 best transcript NM_001242480; Salzman2013 ANNOTATED, CDS, coding, OVCODE, OVEXON, UTR3, UTR5 best transcript NM_001242480; Salzman2013 ANNOTATED, ncRNA, OVEXON best transcript TCONS_00030034; Salzman2013 ANNOTATED, ncRNA, OVCODE, OVEXON best transcript TCONS_00030034; Salzman2013 ALT_ACCEPTOR, ncRNA, OVCODE, OVEXON, upstream_start best transcript TCONS_00030034; Salzman2013 ALT_DONOR, downstream_end, ncRNA, OVEXON best transcript TCONS_00030035; Salzman2013 ALT_DONOR, coding, intronic, OVEXON, UTR5 best transcript NM_001242480; uncharacterized protein LOC389831 [Source:RefSeq peptide;Acc:NP_001229409] |
| 0,96 | SLC7A4                                                      | solute carrier family 7, member 4                                                                                                                                                                                                                                                                                                                                                                                                                                                                                                                                                                                                                                                                                    |
| 0,96 | NUP188                                                      | nucleoporin 188kDa                                                                                                                                                                                                                                                                                                                                                                                                                                                                                                                                                                                                                                                                                                   |
| 0,96 | MED8                                                        | mediator complex subunit 8                                                                                                                                                                                                                                                                                                                                                                                                                                                                                                                                                                                                                                                                                           |
| 0,96 | ESAM                                                        | endothelial cell adhesion molecule                                                                                                                                                                                                                                                                                                                                                                                                                                                                                                                                                                                                                                                                                   |
| 0,96 | TGM4                                                        | transglutaminase 4                                                                                                                                                                                                                                                                                                                                                                                                                                                                                                                                                                                                                                                                                                   |
| 0,96 | CD69                                                        | CD69 molecule                                                                                                                                                                                                                                                                                                                                                                                                                                                                                                                                                                                                                                                                                                        |
| 0,96 | NUP155                                                      | nucleoporin 155kDa                                                                                                                                                                                                                                                                                                                                                                                                                                                                                                                                                                                                                                                                                                   |
| 0,96 | NDUFA10                                                     | NADH dehydrogenase (ubiquinone) 1 alpha subcomplex, 10, 42kDa                                                                                                                                                                                                                                                                                                                                                                                                                                                                                                                                                                                                                                                        |
| 0,96 | DNAJC16                                                     | DnaJ (Hsp40) homolog, subfamily C, member 16                                                                                                                                                                                                                                                                                                                                                                                                                                                                                                                                                                                                                                                                         |
| 0,96 | ALPK1                                                       | alpha kinase 1                                                                                                                                                                                                                                                                                                                                                                                                                                                                                                                                                                                                                                                                                                       |
| 0,96 | ARMT1                                                       | acidic residue methyltransferase 1                                                                                                                                                                                                                                                                                                                                                                                                                                                                                                                                                                                                                                                                                   |
| 0,96 | DMBT1                                                       | deleted in malignant brain tumors 1                                                                                                                                                                                                                                                                                                                                                                                                                                                                                                                                                                                                                                                                                  |
| 0,96 | EHBP1                                                       | EH domain binding protein 1                                                                                                                                                                                                                                                                                                                                                                                                                                                                                                                                                                                                                                                                                          |
| 0,96 | OR8I2                                                       | olfactory receptor, family 8, subfamily I, member 2                                                                                                                                                                                                                                                                                                                                                                                                                                                                                                                                                                                                                                                                  |
| 0,96 | KAZALD1                                                     | Kazal-type serine peptidase inhibitor domain 1                                                                                                                                                                                                                                                                                                                                                                                                                                                                                                                                                                                                                                                                       |
| 0,96 | CHMP3                                                       | charged multivesicular body protein 3                                                                                                                                                                                                                                                                                                                                                                                                                                                                                                                                                                                                                                                                                |
| 0,96 | UHRF2                                                       | ubiquitin-like with PHD and ring finger domains 2, E3 ubiquitin protein ligase                                                                                                                                                                                                                                                                                                                                                                                                                                                                                                                                                                                                                                       |
| 0,96 | LCMT1                                                       | leucine carboxyl methyltransferase 1                                                                                                                                                                                                                                                                                                                                                                                                                                                                                                                                                                                                                                                                                 |
| 0,96 | LOC151121;<br>AC079586.1                                    | uncharacterized LOC151121; novel transcript                                                                                                                                                                                                                                                                                                                                                                                                                                                                                                                                                                                                                                                                          |
| 0,96 | YTHDC2                                                      | YTH domain containing 2                                                                                                                                                                                                                                                                                                                                                                                                                                                                                                                                                                                                                                                                                              |
| 0,96 | CDK5R1                                                      | cyclin-dependent kinase 5, regulatory subunit 1 (p35)                                                                                                                                                                                                                                                                                                                                                                                                                                                                                                                                                                                                                                                                |
| 0,96 | ATP1B3                                                      | ATPase, Na <sup>+</sup> /K <sup>+</sup> transporting, beta 3 polypeptide                                                                                                                                                                                                                                                                                                                                                                                                                                                                                                                                                                                                                                             |
| 0,96 | PHKB                                                        | Transcript Identified by AceView, Entrez Gene ID(s) 5257                                                                                                                                                                                                                                                                                                                                                                                                                                                                                                                                                                                                                                                             |
| 0,96 | C6orf58                                                     | chromosome 6 open reading frame 58                                                                                                                                                                                                                                                                                                                                                                                                                                                                                                                                                                                                                                                                                   |
| 0,96 | TM9SF1                                                      | transmembrane 9 superfamily member 1                                                                                                                                                                                                                                                                                                                                                                                                                                                                                                                                                                                                                                                                                 |
| 0,96 | TRAK1                                                       | trafficking protein, kinesin binding 1                                                                                                                                                                                                                                                                                                                                                                                                                                                                                                                                                                                                                                                                               |
| 0,96 | OR52I2                                                      | olfactory receptor, family 52, subfamily I, member 2                                                                                                                                                                                                                                                                                                                                                                                                                                                                                                                                                                                                                                                                 |
| 0,96 | PET100                                                      | PET100 homolog                                                                                                                                                                                                                                                                                                                                                                                                                                                                                                                                                                                                                                                                                                       |
| 0,96 | UBXN7                                                       | UBX domain protein 7                                                                                                                                                                                                                                                                                                                                                                                                                                                                                                                                                                                                                                                                                                 |

|      |          |                                                                                           |
|------|----------|-------------------------------------------------------------------------------------------|
| 0,96 | GPIHBP1  | glycosylphosphatidylinositol anchored high density lipoprotein binding protein 1          |
| 0,96 | C8G      | complement component 8, gamma polypeptide                                                 |
| 0,96 | SF1      | Memczak2013 ALT_ACCEPTOR, ALT_DONOR, coding, INTERNAL, intronic best transcript NM_201998 |
| 0,96 | PKN1     | protein kinase N1                                                                         |
| 0,96 | ONECUT2  | one cut homeobox 2                                                                        |
| 0,96 | TMEM95   | transmembrane protein 95                                                                  |
| 0,96 | HIST1H4H | histone cluster 1, H4h                                                                    |
| 0,96 | ZNF852   | zinc finger protein 852                                                                   |
| 0,96 | SKA2     | spindle and kinetochore associated complex subunit 2                                      |
| 0,96 | STYK1    | serine/threonine/tyrosine kinase 1                                                        |
| 0,96 | CRB1     | crumbs family member 1, photoreceptor morphogenesis associated                            |
| 0,96 | CAMTA2   | calmodulin binding transcription activator 2                                              |
| 0,96 | MRPS15   | mitochondrial ribosomal protein S15                                                       |
| 0,96 | MAGT1    | magnesium transporter 1                                                                   |
| 0,96 | SFN      | stratifin                                                                                 |
| 0,96 | KDM3B    | lysine (K)-specific demethylase 3B                                                        |
| 0,96 | TRIM69   | tripartite motif containing 69                                                            |
| 0,96 | SNX11    | sorting nexin 11                                                                          |
| 0,96 | LIMCH1   | LIM and calponin homology domains 1                                                       |
| 0,96 | GINS2    | GINS complex subunit 2 (Psf2 homolog)                                                     |
| 0,96 | RREB1    | ras responsive element binding protein 1                                                  |
| 0,96 | CETN2    | centrin 2                                                                                 |
| 0,96 | CNOT11   | CCR4-NOT transcription complex subunit 11                                                 |
| 0,96 | TOR1B    | torsin family 1, member B (torsin B)                                                      |
| 0,96 | SRD5A3   | steroid 5 alpha-reductase 3                                                               |
| 0,96 | CCDC159  | coiled-coil domain containing 159                                                         |
| 0,96 | TSPAN6   | tetraspanin 6                                                                             |
| 0,96 | LTA      | lymphotoxin alpha                                                                         |
| 0,96 | RPS6KA1  | ribosomal protein S6 kinase, 90kDa, polypeptide 1                                         |
| 0,96 | CMC2     | C-x(9)-C motif containing 2                                                               |
| 0,96 | GABRA3   | gamma-aminobutyric acid (GABA) A receptor, alpha 3                                        |
| 0,96 | AGTRAP   | angiotensin II receptor-associated protein                                                |
| 0,96 | ZNRF2    | zinc and ring finger 2, E3 ubiquitin protein ligase                                       |
| 0,96 | NTNG2    | netrin G2                                                                                 |
| 0,96 | FLCN     | folliculin                                                                                |
| 0,96 | AAGAB    | alpha- and gamma-adaptin binding protein                                                  |
| 0,96 | HLA-DQA2 | major histocompatibility complex, class II, DQ alpha 2                                    |
| 0,96 | MORF4L1  | mortality factor 4 like 1                                                                 |
| 0,96 | SESN1    | sestrin 1                                                                                 |
| 0,96 | KIAA1143 | KIAA1143                                                                                  |

|      |                                                       |                                                                                                                                                                                                                                                                                 |
|------|-------------------------------------------------------|---------------------------------------------------------------------------------------------------------------------------------------------------------------------------------------------------------------------------------------------------------------------------------|
| 0,96 | IGLL5; MIR5571; IGLC1; IGLC2; IGLV2-5; IGLV3-1; IGLJ1 | immunoglobulin lambda-like polypeptide 5; microRNA 5571; immunoglobulin lambda constant 1 (Mcg marker); immunoglobulin lambda constant 2 (Kern-Oz marker); immunoglobulin lambda variable 2-5 (pseudogene); immunoglobulin lambda variable 3-1; immunoglobulin lambda joining 1 |
| 0,96 | VWF                                                   | von Willebrand factor                                                                                                                                                                                                                                                           |
| 0,96 | FAM173B                                               | family with sequence similarity 173, member B                                                                                                                                                                                                                                   |
| 0,96 | ADK; MRPL35P3                                         | adenosine kinase; mitochondrial ribosomal protein L35 pseudogene 3                                                                                                                                                                                                              |
| 0,96 | TMEFF2                                                | transmembrane protein with EGF-like and two follistatin-like domains 2                                                                                                                                                                                                          |
| 0,96 | KLHL36                                                | kelch-like family member 36                                                                                                                                                                                                                                                     |
| 0,96 | ATP5O                                                 | ATP synthase, H <sup>+</sup> transporting, mitochondrial F1 complex, O subunit                                                                                                                                                                                                  |
| 0,96 | QSER1                                                 | glutamine and serine rich 1                                                                                                                                                                                                                                                     |
| 0,96 | SAP18                                                 | Sin3A associated protein 18kDa                                                                                                                                                                                                                                                  |
| 0,96 | PIP5K1C                                               | Zhang2013 ALT_ACCEPTOR, ALT_DONOR, coding, INTERNAL, intronic best transcript NM_012398                                                                                                                                                                                         |
| 0,96 | OAS1                                                  | 2-5-oligoadenylate synthetase 1                                                                                                                                                                                                                                                 |
| 0,96 | TTF2                                                  | transcription termination factor, RNA polymerase II                                                                                                                                                                                                                             |
| 0,96 | ADGRA2                                                | adhesion G protein-coupled receptor A2                                                                                                                                                                                                                                          |
| 0,96 | COMMD3-BMI1; BMI1; COMMD3                             | COMMD3-BMI1 readthrough; BMI1 proto-oncogene, polycomb ring finger; COMM domain containing 3                                                                                                                                                                                    |
| 0,96 | FBXO42                                                | F-box protein 42                                                                                                                                                                                                                                                                |
| 0,96 | TRIM4                                                 | tripartite motif containing 4                                                                                                                                                                                                                                                   |
| 0,96 | CD80                                                  | CD80 molecule                                                                                                                                                                                                                                                                   |
| 0,96 | CMTM2                                                 | CKLF-like MARVEL transmembrane domain containing 2                                                                                                                                                                                                                              |
| 0,96 | LRRC42                                                | leucine rich repeat containing 42                                                                                                                                                                                                                                               |
| 0,96 | ZNF705B                                               | zinc finger protein 705B                                                                                                                                                                                                                                                        |
| 0,96 | OSER1                                                 | oxidative stress responsive serine-rich 1                                                                                                                                                                                                                                       |
| 0,96 | BCL2L2-PABPN1                                         | BCL2L2-PABPN1 readthrough                                                                                                                                                                                                                                                       |
| 0,96 | SOWAHC                                                | soosondowah ankyrin repeat domain family member C                                                                                                                                                                                                                               |
| 0,96 | APBA1                                                 | amyloid beta (A4) precursor protein-binding, family A, member 1                                                                                                                                                                                                                 |
| 0,96 | EXO1                                                  | exonuclease 1                                                                                                                                                                                                                                                                   |
| 0,96 | SURF4                                                 | surfeit 4                                                                                                                                                                                                                                                                       |
| 0,96 | ZNF141                                                | zinc finger protein 141                                                                                                                                                                                                                                                         |
| 0,96 | POLE                                                  | Transcript Identified by AceView, Entrez Gene ID(s) 5426                                                                                                                                                                                                                        |
| 0,96 | KIAA1841                                              | KIAA1841                                                                                                                                                                                                                                                                        |
| 0,96 | OGDHL                                                 | oxoglutarate dehydrogenase-like                                                                                                                                                                                                                                                 |
| 0,96 | CRADD                                                 | CASP2 and RIPK1 domain containing adaptor with death domain                                                                                                                                                                                                                     |
| 0,96 | SPATA7                                                | spermatogenesis associated 7                                                                                                                                                                                                                                                    |
| 0,96 | NGB                                                   | neuroglobin                                                                                                                                                                                                                                                                     |
| 0,96 | C4orf48                                               | chromosome 4 open reading frame 48                                                                                                                                                                                                                                              |
| 0,96 | RTTN                                                  | rotatin                                                                                                                                                                                                                                                                         |

|      |                                               |                                                                                                                                                                                                                                                                                                                                                                                                                                                                                                                                                                                                                          |
|------|-----------------------------------------------|--------------------------------------------------------------------------------------------------------------------------------------------------------------------------------------------------------------------------------------------------------------------------------------------------------------------------------------------------------------------------------------------------------------------------------------------------------------------------------------------------------------------------------------------------------------------------------------------------------------------------|
| 0,96 | ZCCHC6                                        | zinc finger, CCHC domain containing 6                                                                                                                                                                                                                                                                                                                                                                                                                                                                                                                                                                                    |
| 0,96 | KNSTRN                                        | kinetochore-localized astrin/SPAG5 binding protein                                                                                                                                                                                                                                                                                                                                                                                                                                                                                                                                                                       |
| 0,96 | CCDC50                                        | coiled-coil domain containing 50                                                                                                                                                                                                                                                                                                                                                                                                                                                                                                                                                                                         |
| 0,96 | WDR13                                         | WD repeat domain 13                                                                                                                                                                                                                                                                                                                                                                                                                                                                                                                                                                                                      |
| 0,96 | RASSF7                                        | Ras association (RalGDS/AF-6) domain family (N-terminal) member 7                                                                                                                                                                                                                                                                                                                                                                                                                                                                                                                                                        |
| 0,96 | PTPRT                                         | protein tyrosine phosphatase, receptor type, T                                                                                                                                                                                                                                                                                                                                                                                                                                                                                                                                                                           |
| 0,96 | FBXO39                                        | F-box protein 39                                                                                                                                                                                                                                                                                                                                                                                                                                                                                                                                                                                                         |
| 0,96 | TRPM7                                         | transient receptor potential cation channel, subfamily M, member 7                                                                                                                                                                                                                                                                                                                                                                                                                                                                                                                                                       |
| 0,96 | CYP27C1                                       | cytochrome P450, family 27, subfamily C, polypeptide 1                                                                                                                                                                                                                                                                                                                                                                                                                                                                                                                                                                   |
| 0,96 | EIF2B2                                        | eukaryotic translation initiation factor 2B, subunit 2 beta, 39kDa                                                                                                                                                                                                                                                                                                                                                                                                                                                                                                                                                       |
| 0,96 | WWC2                                          | WW and C2 domain containing 2                                                                                                                                                                                                                                                                                                                                                                                                                                                                                                                                                                                            |
| 0,96 | TGM4                                          | transglutaminase 4                                                                                                                                                                                                                                                                                                                                                                                                                                                                                                                                                                                                       |
| 0,96 | NBPF15                                        | neuroblastoma breakpoint family, member 15                                                                                                                                                                                                                                                                                                                                                                                                                                                                                                                                                                               |
| 0,96 | SLC1A7                                        | solute carrier family 1 (glutamate transporter), member 7                                                                                                                                                                                                                                                                                                                                                                                                                                                                                                                                                                |
| 0,96 | TPH1                                          | tryptophan hydroxylase 1                                                                                                                                                                                                                                                                                                                                                                                                                                                                                                                                                                                                 |
| 0,96 | LOC100130451;<br>AC079610.2;<br>RP11-105N14.2 | uncharacterized LOC100130451; novel transcript (LOC100130451); novel transcript                                                                                                                                                                                                                                                                                                                                                                                                                                                                                                                                          |
| 0,96 | PRADC1                                        | protease-associated domain containing 1                                                                                                                                                                                                                                                                                                                                                                                                                                                                                                                                                                                  |
| 0,96 | TRHDE                                         | thyrotropin-releasing hormone degrading enzyme                                                                                                                                                                                                                                                                                                                                                                                                                                                                                                                                                                           |
| 0,96 | ATG2A                                         | autophagy related 2A                                                                                                                                                                                                                                                                                                                                                                                                                                                                                                                                                                                                     |
| 0,96 | DHFR; DHFRP1                                  | dihydrofolate reductase; dihydrofolate reductase pseudogene 1                                                                                                                                                                                                                                                                                                                                                                                                                                                                                                                                                            |
| 0,96 | DNM1L                                         | dynamitin 1-like                                                                                                                                                                                                                                                                                                                                                                                                                                                                                                                                                                                                         |
| 0,96 | ZAK; pk                                       | sterile alpha motif and leucine zipper containing kinase AZK; Mitogen-activated protein kinase kinase kinase MLT [Source:UniProtKB/Swiss-Prot;Acc:Q9NYL2]; Salzman2013 ANNOTATED, CDS, coding, INTERNAL, OVCODE, OVERLAPTX, OVEXON best transcript NM_133646; Salzman2013 ANNOTATED, CDS, coding, OVCODE, OVERLAPTX, OVEXON, UTR3 best transcript NM_016653; Salzman2013 ANNOTATED, CDS, coding, OVCODE, OVERLAPTX, OVEXON, UTR3 best transcript NM_133646; Salzman2013 ANNOTATED, CDS, coding, INTERNAL, OVCODE, OVERLAPTX, OVEXON best transcript NM_016653; Transcript Identified by AceView, Entrez Gene ID(s) 51776 |
| 0,96 | DHX38                                         | DEAH (Asp-Glu-Ala-His) box polypeptide 38                                                                                                                                                                                                                                                                                                                                                                                                                                                                                                                                                                                |
| 0,96 | BLMH                                          | bleomycin hydrolase                                                                                                                                                                                                                                                                                                                                                                                                                                                                                                                                                                                                      |
| 0,96 | WISP1                                         | WNT1 inducible signaling pathway protein 1                                                                                                                                                                                                                                                                                                                                                                                                                                                                                                                                                                               |
| 0,96 | MXD3                                          | MAX dimerization protein 3                                                                                                                                                                                                                                                                                                                                                                                                                                                                                                                                                                                               |
| 0,96 | RCBTB1                                        | regulator of chromosome condensation (RCC1) and BTB (POZ) domain containing protein 1                                                                                                                                                                                                                                                                                                                                                                                                                                                                                                                                    |
| 0,96 | APEH                                          | acylaminoacyl-peptide hydrolase                                                                                                                                                                                                                                                                                                                                                                                                                                                                                                                                                                                          |

|      |                                      |                                                                                              |
|------|--------------------------------------|----------------------------------------------------------------------------------------------|
| 0,96 | TLE1                                 | transducin-like enhancer of split 1 (E(sp1) homolog, Drosophila)                             |
| 0,96 | HAX1                                 | HCLS1 associated protein X-1                                                                 |
| 0,96 | TXN2                                 | thioredoxin 2                                                                                |
| 0,96 | LRIG1                                |                                                                                              |
| 0,96 | OR1C1                                | olfactory receptor, family 1, subfamily C, member 1                                          |
| 0,96 | FAM221B                              | family with sequence similarity 221, member B                                                |
| 0,96 | ROM1                                 | retinal outer segment membrane protein 1                                                     |
| 0,96 | TCP11L1                              | t-complex 11, testis-specific-like 1                                                         |
| 0,96 | CHST4                                | carbohydrate (N-acetylglucosamine 6-O) sulfotransferase 4                                    |
| 0,96 | SCN9A                                | sodium channel, voltage gated, type IX alpha subunit                                         |
| 0,96 | SLIT2                                | Jeck2013 ALT_ACCEPTOR, ALT_DONOR, coding, INTERNAL, intronic best transcript NM_004787       |
| 0,96 | ZNF212                               | zinc finger protein 212                                                                      |
| 0,96 | AKAP1                                | A kinase (PRKA) anchor protein 1                                                             |
| 0,96 | PLEKHA2                              | pleckstrin homology domain containing, family A (phosphoinositide binding specific) member 2 |
| 0,96 | CTNNA3                               | catenin (cadherin-associated protein), alpha 3                                               |
| 0,96 | DFNB59                               | deafness, autosomal recessive 59                                                             |
| 0,96 | CYB5A                                | cytochrome b5 type A (microsomal)                                                            |
| 0,96 | RASSF10                              | Ras association (RalGDS/AF-6) domain family (N-terminal) member 10                           |
| 0,96 | RPS25                                | ribosomal protein S25                                                                        |
| 0,96 | MGARP                                | mitochondria localized glutamic acid rich protein                                            |
| 0,96 | ARHGEF17                             | Rho guanine nucleotide exchange factor 17                                                    |
| 0,96 | EEF1B2;<br>SNORA41                   | eukaryotic translation elongation factor 1 beta 2; small nucleolar RNA, H/ACA box 41         |
| 0,96 | SNORD49A;<br>SNORD65;<br>LRRC75A-AS1 | small nucleolar RNA, C/D box 49A; small nucleolar RNA, C/D box 65; LRRC75A antisense RNA 1   |
| 0,96 | LINC01359                            | long intergenic non-protein coding RNA 1359                                                  |
| 0,96 | ZNF623                               | zinc finger protein 623                                                                      |
| 0,96 | OR8B4                                | olfactory receptor, family 8, subfamily B, member 4 (gene/pseudogene)                        |
| 0,96 | NUDT12                               | nudix hydrolase 12                                                                           |
| 0,96 | NUP54                                | nucleoporin 54kDa                                                                            |
| 0,96 | CDKL1                                | cyclin-dependent kinase-like 1 (CDC2-related kinase)                                         |
| 0,96 | NUDT5                                | nudix hydrolase 5                                                                            |
| 0,96 | OR4K2                                | olfactory receptor, family 4, subfamily K, member 2                                          |
| 0,96 | ADAMTS13                             | ADAM metalloproteinase with thrombospondin type 1 motif 13                                   |
| 0,96 | PXDNL                                | peroxidase like                                                                              |
| 0,96 | CACNG6                               | calcium channel, voltage-dependent, gamma subunit 6                                          |
| 0,96 | AASDHPPT                             | aminoadipate-semialdehyde dehydrogenase-phosphopantetheinyl transferase                      |
| 0,96 | NRTN                                 | neurturin                                                                                    |
| 0,96 | PTN                                  | pleiotrophin                                                                                 |
| 0,96 | ACSM3                                | acyl-CoA synthetase medium-chain family member 3                                             |
| 0,96 | PPP4R3B                              | protein phosphatase 4, regulatory subunit 3B                                                 |

|      |                   |                                                                                 |
|------|-------------------|---------------------------------------------------------------------------------|
| 0,96 | CDCA7L            | cell division cycle associated 7-like                                           |
| 0,96 | RPL10L            | ribosomal protein L10-like                                                      |
| 0,96 | LDB2              | LIM domain binding 2                                                            |
| 0,96 | NIF3L1            | NIF3 NGG1 interacting factor 3-like 1                                           |
| 0,96 | COX7A1            | cytochrome c oxidase subunit VIIa polypeptide 1 (muscle)                        |
| 0,96 | NDUFB1            | NADH dehydrogenase (ubiquinone) 1 beta subcomplex, 1, 7kDa                      |
| 0,96 | SNRPA1            | small nuclear ribonucleoprotein polypeptide A                                   |
| 0,96 | LMNTD2            | lamin tail domain containing 2                                                  |
| 0,96 | KRT6C             | keratin 6C, type II                                                             |
| 0,96 | TNS3              | tensin 3                                                                        |
| 0,96 | SPINK9            | serine peptidase inhibitor, Kazal type 9                                        |
| 0,96 | ALDH3A2           | aldehyde dehydrogenase 3 family, member A2                                      |
| 0,96 | HNRNPCL1          | heterogeneous nuclear ribonucleoprotein C-like 1                                |
| 0,96 | ILF2              | interleukin enhancer binding factor 2                                           |
| 0,96 | ALDH1L2           | aldehyde dehydrogenase 1 family, member L2                                      |
| 0,96 | PRAMEF4           | PRAME family member 4                                                           |
| 0,96 | ZNF541            | zinc finger protein 541                                                         |
| 0,96 | GMNN              | geminin, DNA replication inhibitor                                              |
| 0,96 | SOX3              | SRY box 3                                                                       |
| 0,96 | WWTR1             | WW domain containing transcription regulator 1                                  |
| 0,96 | IGFBP3            | insulin like growth factor binding protein 3                                    |
| 0,96 | TAF7L             | TATA box binding protein associated factor 7 like                               |
| 0,96 | BCL2L11           | BCL2-like 11 (apoptosis facilitator)                                            |
| 0,96 | OR2T8             | olfactory receptor, family 2, subfamily T, member 8                             |
| 0,96 | EIF3F             | eukaryotic translation initiation factor 3, subunit F                           |
| 0,96 | C20orf27          | chromosome 20 open reading frame 27                                             |
| 0,96 | SULF1             | sulfatase 1                                                                     |
| 0,96 | C16orf87          | chromosome 16 open reading frame 87                                             |
| 0,96 | UBE2S;<br>UBE2SP1 | ubiquitin-conjugating enzyme E2S; ubiquitin conjugating enzyme E2S pseudogene 1 |
| 0,96 | ALDH3B1           | aldehyde dehydrogenase 3 family, member B1                                      |
| 0,96 | ALAS2             | 5-aminolevulinate synthase 2                                                    |
| 0,96 | PRKAG1            | protein kinase, AMP-activated, gamma 1 non-catalytic subunit                    |
| 0,96 | TMEM108           | transmembrane protein 108                                                       |
| 0,96 | SLC4A3            | solute carrier family 4 (anion exchanger), member 3                             |
| 0,96 | OR6C3             | olfactory receptor, family 6, subfamily C, member 3                             |
| 0,96 | CDH6              | cadherin 6, type 2, K-cadherin (fetal kidney)                                   |
| 0,96 | SBSN              | suprabasin                                                                      |
| 0,96 | VAMP4             | vesicle associated membrane protein 4                                           |
| 0,96 | SNX13             | sorting nexin 13                                                                |
| 0,96 | OCLM              | Transcript Identified by AceView, Entrez Gene ID(s) 10896                       |
| 0,96 | BMPRI1A           | bone morphogenetic protein receptor type IA                                     |
| 0,96 | SURF2             | surfeit 2                                                                       |
| 0,96 | OR1L3             | olfactory receptor, family 1, subfamily L, member 3                             |
| 0,96 | OR4C6             | olfactory receptor, family 4, subfamily C, member 6                             |

|      |                             |                                                                                                             |
|------|-----------------------------|-------------------------------------------------------------------------------------------------------------|
| 0,96 | RPS29;<br>RPL32P29          | ribosomal protein S29; ribosomal protein L32<br>pseudogene 29                                               |
| 0,96 | T                           | T brachyury transcription factor                                                                            |
| 0,96 | SH2B2                       | SH2B adaptor protein 2                                                                                      |
| 0,96 | SPINK13                     | serine peptidase inhibitor, Kazal type 13 (putative)                                                        |
| 0,96 | KLRF1                       | killer cell lectin-like receptor subfamily F, member 1                                                      |
| 0,96 | SMIM12                      | small integral membrane protein 12                                                                          |
| 0,96 | CROCC                       | Zhang2013 ALT_ACCEPTOR, ALT_DONOR, coding,<br>INTERNAL, intronic best transcript NM_014675                  |
| 0,96 | PPM1F                       | protein phosphatase, Mg <sup>2+</sup> /Mn <sup>2+</sup> dependent, 1F                                       |
| 0,96 | TBRG4;<br>SNORA5B           | transforming growth factor beta regulator 4; small<br>nucleolar RNA, H/ACA box 5B                           |
| 0,96 | COMMD7                      | COMM domain containing 7                                                                                    |
| 0,96 | MAPK3                       | mitogen-activated protein kinase 3                                                                          |
| 0,96 | OR13J1                      | olfactory receptor, family 13, subfamily J, member 1                                                        |
| 0,96 | PAGE3                       | P antigen family, member 3 (prostate associated)                                                            |
| 0,96 | ACSS3                       | acyl-CoA synthetase short-chain family member 3                                                             |
| 0,96 | SH3YL1                      | SH3 and SYLF domain containing 1                                                                            |
| 0,96 | HERC3                       | HECT and RLD domain containing E3 ubiquitin<br>protein ligase 3                                             |
| 0,96 | ZSCAN9                      | zinc finger and SCAN domain containing 9                                                                    |
| 0,96 | THSD1                       | thrombospondin type 1 domain containing 1                                                                   |
| 0,96 | RHOXF1                      | Rhox homeobox family, member 1                                                                              |
| 0,96 | LYZL2                       | lysozyme-like 2                                                                                             |
| 0,96 | SYN2                        | synapsin II                                                                                                 |
| 0,96 | FLJ38576; RP11-<br>173M11.6 | uncharacterized LOC651430; uncharacterized<br>LOC651430 [Source:EntrezGene;Acc:651430]; novel<br>transcript |
| 0,96 | AIG1                        | androgen-induced 1                                                                                          |
| 0,96 | EIF3E                       | eukaryotic translation initiation factor 3, subunit E                                                       |
| 0,96 | CD59                        | CD59 molecule, complement regulatory protein                                                                |
| 0,96 | ACRBP                       | acrosin binding protein                                                                                     |
| 0,96 | SBK3                        | SH3 domain binding kinase family, member 3                                                                  |
| 0,96 | FAM129B                     | family with sequence similarity 129, member B                                                               |
| 0,96 | PTGR2                       | prostaglandin reductase 2                                                                                   |
| 0,96 | SLC3A1                      | solute carrier family 3 (amino acid transporter heavy<br>chain), member 1                                   |
| 0,96 | LOC283788;<br>AL592183.1    | FSHD region gene 1 pseudogene                                                                               |
| 0,96 | DPY30                       | dpy-30 histone methyltransferase complex regulatory<br>subunit                                              |
| 0,96 | TAF1                        | TAF1 RNA polymerase II, TATA box binding protein<br>(TBP)-associated factor, 250kDa                         |
| 0,96 | C14orf159                   | chromosome 14 open reading frame 159                                                                        |
| 0,96 | FAM207A                     | family with sequence similarity 207, member A                                                               |
| 0,96 | EPHA3                       | EPH receptor A3                                                                                             |
| 0,96 | CCDC172                     | coiled-coil domain containing 172                                                                           |
| 0,95 | ZNF436                      | zinc finger protein 436                                                                                     |
| 0,95 | ISL2                        | ISL LIM homeobox 2                                                                                          |

|      |                   |                                                                                                                                                                                                                                                                                                                                     |
|------|-------------------|-------------------------------------------------------------------------------------------------------------------------------------------------------------------------------------------------------------------------------------------------------------------------------------------------------------------------------------|
| 0,95 | FAM81B            | family with sequence similarity 81, member B                                                                                                                                                                                                                                                                                        |
| 0,95 | TFDP2             | transcription factor Dp-2 (E2F dimerization partner 2)                                                                                                                                                                                                                                                                              |
| 0,95 | HPS6              | Hermansky-Pudlak syndrome 6                                                                                                                                                                                                                                                                                                         |
| 0,95 | ZNF417            | zinc finger protein 417                                                                                                                                                                                                                                                                                                             |
| 0,95 | sep-15            | 15 kDa selenoprotein; Salzman2013 ANNOTATED, CDS, coding, INTERNAL, OVCODE, OVEXON best transcript NM_004261; Transcript Identified by AceView, Entrez Gene ID(s) 9403, RefSeq ID(s) NM_203341; Transcript Identified by AceView, Entrez Gene ID(s) 9403, RefSeq ID(s) NM_004261; 15 kDa selenoprotein [Source:EntrezGene;Acc:9403] |
| 0,95 | CDAN1             | codanin 1                                                                                                                                                                                                                                                                                                                           |
| 0,95 | SNTB1             | syntrophin, beta 1 (dystrophin-associated protein A1, 59kDa, basic component 1)                                                                                                                                                                                                                                                     |
| 0,95 | P4HB              | prolyl 4-hydroxylase, beta polypeptide                                                                                                                                                                                                                                                                                              |
| 0,95 | PQLC2L            | PQ loop repeat containing 2-like                                                                                                                                                                                                                                                                                                    |
| 0,95 | MYDGF             | myeloid-derived growth factor                                                                                                                                                                                                                                                                                                       |
| 0,95 | SAMD13            | sterile alpha motif domain containing 13                                                                                                                                                                                                                                                                                            |
| 0,95 | DSN1              | DSN1 homolog, MIS12 kinetochore complex component                                                                                                                                                                                                                                                                                   |
| 0,95 | RAB15             | RAB15, member RAS oncogene family                                                                                                                                                                                                                                                                                                   |
| 0,95 | TYW1B             | tRNA-yW synthesizing protein 1 homolog B (S. cerevisiae)                                                                                                                                                                                                                                                                            |
| 0,95 | RPL39;<br>SNORA69 | ribosomal protein L39; small nucleolar RNA, H/ACA box 69                                                                                                                                                                                                                                                                            |
| 0,95 | DESI2             | desumoylating isopeptidase 2                                                                                                                                                                                                                                                                                                        |
| 0,95 | SNCA              | synuclein alpha                                                                                                                                                                                                                                                                                                                     |
| 0,95 | TBC1D20           | TBC1 domain family, member 20                                                                                                                                                                                                                                                                                                       |
| 0,95 | VAR5              | valyl-tRNA synthetase                                                                                                                                                                                                                                                                                                               |
| 0,95 | LOC646938         | TBC1 domain family, member 2B pseudogene; Transcript Identified by AceView, Entrez Gene ID(s) 646938                                                                                                                                                                                                                                |
| 0,95 | GSDMD             | gasdermin D                                                                                                                                                                                                                                                                                                                         |
| 0,95 | USP47             | ubiquitin specific peptidase 47                                                                                                                                                                                                                                                                                                     |
| 0,95 | MNDA              | myeloid cell nuclear differentiation antigen                                                                                                                                                                                                                                                                                        |
| 0,95 | OGN               | osteoglycin                                                                                                                                                                                                                                                                                                                         |
| 0,95 | ZNF786            | zinc finger protein 786                                                                                                                                                                                                                                                                                                             |
| 0,95 | KLHL9             | kelch-like family member 9                                                                                                                                                                                                                                                                                                          |
| 0,95 | EHD4              | EH domain containing 4                                                                                                                                                                                                                                                                                                              |
| 0,95 | BLVRA             | biliverdin reductase A                                                                                                                                                                                                                                                                                                              |
| 0,95 | COA4              | cytochrome c oxidase assembly factor 4 homolog                                                                                                                                                                                                                                                                                      |
| 0,95 | PSMD8             | proteasome 26S subunit, non-ATPase 8                                                                                                                                                                                                                                                                                                |
| 0,95 | IL17F             | interleukin 17F                                                                                                                                                                                                                                                                                                                     |
| 0,95 | C20orf24          | chromosome 20 open reading frame 24                                                                                                                                                                                                                                                                                                 |
| 0,95 | PDIA6             | protein disulfide isomerase family A, member 6                                                                                                                                                                                                                                                                                      |
| 0,95 | EPB41             | erythrocyte membrane protein band 4.1                                                                                                                                                                                                                                                                                               |
| 0,95 | ZNF141            | Transcript Identified by AceView, Entrez Gene ID(s) 100288237; 7700                                                                                                                                                                                                                                                                 |
| 0,95 | CAMK4             | calcium/calmodulin-dependent protein kinase IV                                                                                                                                                                                                                                                                                      |
| 0,95 | GJD4              | gap junction protein delta 4                                                                                                                                                                                                                                                                                                        |

|      |                        |                                                                                                                                                                                                  |
|------|------------------------|--------------------------------------------------------------------------------------------------------------------------------------------------------------------------------------------------|
| 0,95 | C2orf15                | chromosome 2 open reading frame 15                                                                                                                                                               |
| 0,95 | DVL2                   | dishevelled segment polarity protein 2                                                                                                                                                           |
| 0,95 | NPEPPS                 | aminopeptidase puromycin sensitive                                                                                                                                                               |
| 0,95 | CISH                   | cytokine inducible SH2-containing protein                                                                                                                                                        |
| 0,95 | PRMT9                  | protein arginine methyltransferase 9                                                                                                                                                             |
| 0,95 | HRH4                   | histamine receptor H4                                                                                                                                                                            |
| 0,95 | IMP3                   | IMP3, U3 small nucleolar ribonucleoprotein                                                                                                                                                       |
| 0,95 | MRGBP                  | MRG/MORF4L binding protein                                                                                                                                                                       |
| 0,95 | ZC3H6                  | zinc finger CCCH-type containing 6                                                                                                                                                               |
| 0,95 | PLAG1                  | pleiomorphic adenoma gene 1                                                                                                                                                                      |
| 0,95 | GSTT2                  | glutathione S-transferase theta 2 (gene/pseudogene)                                                                                                                                              |
| 0,95 | LEMD2                  | LEM domain containing 2                                                                                                                                                                          |
| 0,95 | PP14571;<br>AC110619.2 | uncharacterized LOC100130449; novel transcript, antisense to GPC1; Transcript Identified by AceView, Entrez Gene ID(s) 100130449; uncharacterized LOC100130449 [Source:EntrezGene;Acc:100130449] |
| 0,95 | C5orf56                | chromosome 5 open reading frame 56                                                                                                                                                               |
| 0,95 | IL3RA                  | Jeck2013 ANTISENSE, CDS, coding, INTERNAL, intronic, OVCODE, OVEXON best transcript NM_002183                                                                                                    |
| 0,95 | SYNPO                  | synaptopodin                                                                                                                                                                                     |
| 0,95 | OR11G2                 | olfactory receptor, family 11, subfamily G, member 2                                                                                                                                             |
| 0,95 | LYZL6                  | lysozyme-like 6                                                                                                                                                                                  |
| 0,95 | GOPC                   | golgi-associated PDZ and coiled-coil motif containing                                                                                                                                            |
| 0,95 | FPR1                   | formyl peptide receptor 1                                                                                                                                                                        |
| 0,95 | NAT9                   | N-acetyltransferase 9 (GCN5-related, putative)                                                                                                                                                   |
| 0,95 | AGPAT5                 | 1-acylglycerol-3-phosphate O-acyltransferase 5                                                                                                                                                   |
| 0,95 | PHF1                   | PHD finger protein 1                                                                                                                                                                             |
| 0,95 | STATH                  | statherin                                                                                                                                                                                        |
| 0,95 | SPR                    | sepiapterin reductase (7,8-dihydrobiopterin:NADP+ oxidoreductase)                                                                                                                                |
| 0,95 | SHCBP1                 | SHC SH2-domain binding protein 1                                                                                                                                                                 |
| 0,95 | GAB4                   | GRB2-associated binding protein family, member 4                                                                                                                                                 |
| 0,95 | BCL2L14                | BCL2-like 14 (apoptosis facilitator)                                                                                                                                                             |
| 0,95 | UBE2U                  | ubiquitin-conjugating enzyme E2U (putative)                                                                                                                                                      |
| 0,95 | GPS1                   | G protein pathway suppressor 1                                                                                                                                                                   |
| 0,95 | HIST1H2BD              | histone cluster 1, H2bd                                                                                                                                                                          |
| 0,95 | CA4                    | carbonic anhydrase IV                                                                                                                                                                            |
| 0,95 | USH2A                  | Usher syndrome 2A (autosomal recessive, mild)                                                                                                                                                    |
| 0,95 | CFC1                   | cripto, FRL-1, cryptic family 1                                                                                                                                                                  |
| 0,95 | RNF169                 | ring finger protein 169                                                                                                                                                                          |
| 0,95 | ING3                   | inhibitor of growth family member 3                                                                                                                                                              |
| 0,95 | ARL5A                  | ADP-ribosylation factor like GTPase 5A                                                                                                                                                           |
| 0,95 | TMEM129                | transmembrane protein 129, E3 ubiquitin protein ligase                                                                                                                                           |
| 0,95 | C1orf116               | chromosome 1 open reading frame 116                                                                                                                                                              |
| 0,95 | USP17L17               | ubiquitin specific peptidase 17-like family member 17                                                                                                                                            |
| 0,95 | TWF1                   | twinfilin actin binding protein 1                                                                                                                                                                |

|      |                         |                                                                                                                        |
|------|-------------------------|------------------------------------------------------------------------------------------------------------------------|
| 0,95 | RANGAP1                 | Ran GTPase activating protein 1                                                                                        |
| 0,95 | OTC                     | ornithine carbamoyltransferase                                                                                         |
| 0,95 | ABCB6                   | ATP binding cassette subfamily B member 6<br>(Langereis blood group)                                                   |
| 0,95 | POLR3A                  | polymerase (RNA) III (DNA directed) polypeptide A,<br>155kDa                                                           |
| 0,95 | PTPRO                   | Transcript Identified by AceView, Entrez Gene ID(s)<br>5800                                                            |
| 0,95 | USP13                   | Memczak2013 ANTISENSE, coding, INTERNAL,<br>intronic best transcript NM_003940                                         |
| 0,95 | PLCD1                   | phospholipase C, delta 1                                                                                               |
| 0,95 | PNMA5                   | paraneoplastic Ma antigen family member 5                                                                              |
| 0,95 | ZNF878                  | zinc finger protein 878                                                                                                |
| 0,95 | CD86                    | CD86 molecule                                                                                                          |
| 0,95 | ZNF625-ZNF20;<br>ZNF625 | ZNF625-ZNF20 readthrough (NMD candidate); zinc<br>finger protein 625                                                   |
| 0,95 | AKTIP                   | AKT interacting protein                                                                                                |
| 0,95 | FYTDD1                  | forty-two-three domain containing 1                                                                                    |
| 0,95 | LCN15                   | lipocalin 15                                                                                                           |
| 0,95 | CDCA2                   | cell division cycle associated 2                                                                                       |
| 0,95 | ZNF615                  | zinc finger protein 615                                                                                                |
| 0,95 | OXER1                   | oxoeicosanoid (OXE) receptor 1                                                                                         |
| 0,95 | EFNA5                   | ephrin-A5                                                                                                              |
| 0,95 | KRT4                    | keratin 4, type II                                                                                                     |
| 0,95 | GPR119                  | G protein-coupled receptor 119                                                                                         |
| 0,95 | GLOD5                   | glyoxalase domain containing 5                                                                                         |
| 0,95 | WBP1L                   | WW domain binding protein 1-like                                                                                       |
| 0,95 | PPP6R1                  | protein phosphatase 6, regulatory subunit 1                                                                            |
| 0,95 | RAD1                    | RAD1 checkpoint DNA exonuclease                                                                                        |
| 0,95 | SMC6                    | structural maintenance of chromosomes 6                                                                                |
| 0,95 | LHCGR                   | luteinizing hormone/choriogonadotropin receptor                                                                        |
| 0,95 | LCE1F                   | late cornified envelope 1F                                                                                             |
| 0,95 | GPR33                   | G protein-coupled receptor 33 (gene/pseudogene)                                                                        |
| 0,95 | AATK                    | apoptosis-associated tyrosine kinase                                                                                   |
| 0,95 | RBM11J;<br>RBM11F       | RNA binding motif protein, Y-linked, family 1,<br>member J; RNA binding motif protein, Y-linked,<br>family 1, member F |
| 0,95 | RUNX3                   | runt-related transcription factor 3                                                                                    |
| 0,95 | PEX1                    | peroxisomal biogenesis factor 1                                                                                        |
| 0,95 | RNF41                   | ring finger protein 41, E3 ubiquitin protein ligase                                                                    |
| 0,95 | TMEM186                 | transmembrane protein 186                                                                                              |
| 0,95 | OR8A1                   | olfactory receptor, family 8, subfamily A, member 1                                                                    |
| 0,95 | LASP1                   | LIM and SH3 protein 1                                                                                                  |
| 0,95 | TATDN3                  | TatD DNase domain containing 3                                                                                         |
| 0,95 | PCMTD1                  | protein-L-isoaspartate (D-aspartate) O-<br>methyltransferase domain containing 1                                       |
| 0,95 | CFL1                    | cofilin 1 (non-muscle)                                                                                                 |
| 0,95 | FICD                    | FIC domain containing                                                                                                  |
| 0,95 | ARHGAP11B               | Rho GTPase activating protein 11B                                                                                      |
| 0,95 | HAND2-AS1               | HAND2 antisense RNA 1 (head to head)                                                                                   |

|      |                    |                                                                                |
|------|--------------------|--------------------------------------------------------------------------------|
| 0,95 | HMGB4              | high mobility group box 4                                                      |
| 0,95 | CARKD              | carbohydrate kinase domain containing                                          |
| 0,95 | KCTD9              | potassium channel tetramerization domain containing 9                          |
| 0,95 | PON2               | paraoxonase 2                                                                  |
| 0,95 | FLYWCH2            | FLYWCH family member 2                                                         |
| 0,95 | ERP29              | endoplasmic reticulum protein 29                                               |
| 0,95 | RRM1               | ribonucleotide reductase M1                                                    |
| 0,95 | SLC25A52           | solute carrier family 25, member 52                                            |
| 0,95 | CLCC1              | chloride channel CLIC-like 1                                                   |
| 0,95 | RPS4Y1             | ribosomal protein S4, Y-linked 1                                               |
| 0,95 | TRMT12             | tRNA methyltransferase 12 homolog (S. cerevisiae)                              |
| 0,95 | WWOX               | WW domain containing oxidoreductase                                            |
| 0,95 | MARCH1             | membrane associated ring finger 1                                              |
| 0,95 | MAN2C1             | mannosidase, alpha, class 2C, member 1                                         |
| 0,95 | NPHP3-ACAD11       | NPHP3-ACAD11 readthrough (NMD candidate)                                       |
| 0,95 | OR1Q1              | olfactory receptor, family 1, subfamily Q, member 1                            |
| 0,95 | NKAIN2             | Na <sup>+</sup> /K <sup>+</sup> transporting ATPase interacting 2              |
| 0,95 | CDK5RAP3           | CDK5 regulatory subunit associated protein 3                                   |
| 0,95 | TRIM48             | tripartite motif containing 48                                                 |
| 0,95 | KDM5B              | lysine (K)-specific demethylase 5B                                             |
| 0,95 | POLR2H             | polymerase (RNA) II (DNA directed) polypeptide H                               |
| 0,95 | KIF4B              | kinesin family member 4B                                                       |
| 0,95 | CYP39A1            | cytochrome P450, family 39, subfamily A, polypeptide 1                         |
| 0,95 | CAPN15;<br>MIR5587 | calpain 15; microRNA 5587                                                      |
| 0,95 | SCYL3              | SCY1-like, kinase-like 3                                                       |
| 0,95 | GPR152             | G protein-coupled receptor 152                                                 |
| 0,95 | SMIM24             | small integral membrane protein 24                                             |
| 0,95 | RPA2               | replication protein A2                                                         |
| 0,95 | MICU1              | mitochondrial calcium uptake 1                                                 |
| 0,95 | C17orf102          | chromosome 17 open reading frame 102                                           |
| 0,95 | SP3                | Sp3 transcription factor                                                       |
| 0,95 | FAM65B             | family with sequence similarity 65, member B                                   |
| 0,95 | CCT6B              | chaperonin containing TCP1, subunit 6B (zeta 2)                                |
| 0,95 | TIMM10B            | translocase of inner mitochondrial membrane 10 homolog B (yeast)               |
| 0,95 | HSFX1              | heat shock transcription factor family, X-linked 1                             |
| 0,95 | OC90               | otoconin 90                                                                    |
| 0,95 | REG3G              | regenerating islet-derived 3 gamma                                             |
| 0,95 | ACTN1;<br>HMGN1P3  | actinin, alpha 1; high mobility group nucleosome binding domain 1 pseudogene 3 |
| 0,95 | GHRHR              | growth hormone releasing hormone receptor                                      |
| 0,95 | HLA-C              | major histocompatibility complex, class I, C                                   |
| 0,95 | PPM1H              | protein phosphatase, Mg <sup>2+</sup> /Mn <sup>2+</sup> dependent, 1H          |
| 0,95 | PLXDC1             | plexin domain containing 1                                                     |
| 0,95 | KHSRP;<br>MIR3940  | KH-type splicing regulatory protein; microRNA 3940                             |
| 0,95 | CNOT6              | CCR4-NOT transcription complex subunit 6                                       |

|      |                           |                                                                                                                               |
|------|---------------------------|-------------------------------------------------------------------------------------------------------------------------------|
| 0,95 | NPSR1                     | neuropeptide S receptor 1                                                                                                     |
| 0,95 | FAM84B                    | family with sequence similarity 84, member B                                                                                  |
| 0,95 | OR4K15                    | olfactory receptor, family 4, subfamily K, member 15                                                                          |
| 0,95 | VPS9D1                    | VPS9 domain containing 1                                                                                                      |
| 0,95 | UCN3                      | urocortin 3                                                                                                                   |
| 0,95 | HAS3                      | hyaluronan synthase 3                                                                                                         |
| 0,95 | C7orf13                   | chromosome 7 open reading frame 13                                                                                            |
| 0,95 | IMMT                      | inner membrane protein, mitochondrial                                                                                         |
| 0,95 | LCN10                     | lipocalin 10                                                                                                                  |
| 0,95 | SHC1                      | SHC (Src homology 2 domain containing) transforming protein 1                                                                 |
| 0,95 | SOX21                     | SRY box 21                                                                                                                    |
| 0,95 | DOC2B                     | double C2-like domains, beta                                                                                                  |
| 0,95 | POP7                      | POP7 homolog, ribonuclease P/MRP subunit                                                                                      |
| 0,95 | RNASEH2C                  | ribonuclease H2, subunit C                                                                                                    |
| 0,95 | FNBP1L                    | formin binding protein 1-like                                                                                                 |
| 0,95 | ING3                      | Transcript Identified by AceView, Entrez Gene ID(s) 54556                                                                     |
| 0,95 | TBCA                      | tubulin folding cofactor A                                                                                                    |
| 0,95 | NUPR2                     | nuclear protein 2, transcriptional regulator                                                                                  |
| 0,95 | GIT2                      | G protein-coupled receptor kinase interacting ArfGAP 2                                                                        |
| 0,95 | PARP11                    | poly(ADP-ribose) polymerase family member 11                                                                                  |
| 0,95 | DHRS9                     | dehydrogenase/reductase (SDR family) member 9                                                                                 |
| 0,95 | TP53BP1                   | tumor protein p53 binding protein 1                                                                                           |
| 0,95 | CMIP                      | Memczak2013 ANTISENSE, coding, INTERNAL, intronic best transcript NM_198390                                                   |
| 0,95 | FANCC                     | Fanconi anemia complementation group C                                                                                        |
| 0,95 | RP11-54C4.3; LOC100652758 | uncharacterized protein LOC100652758 [Source:RefSeq peptide;Acc:NP_001265011]; uncharacterized LOC100652758; novel transcript |
| 0,95 | DDT                       | D-dopachrome tautomerase                                                                                                      |
| 0,95 | PTPRS                     | protein tyrosine phosphatase, receptor type, S                                                                                |
| 0,95 | NUP50                     | nucleoporin 50kDa                                                                                                             |
| 0,95 | BLM                       | Bloom syndrome, RecQ helicase-like                                                                                            |
| 0,95 | STX10                     | syntaxin 10                                                                                                                   |
| 0,95 | ITGAV                     | integrin alpha V                                                                                                              |
| 0,95 | RMDN1                     | regulator of microtubule dynamics 1                                                                                           |
| 0,95 | BEND3                     | BEN domain containing 3                                                                                                       |
| 0,95 | RCC2                      | regulator of chromosome condensation 2                                                                                        |
| 0,95 | MRPS34                    | mitochondrial ribosomal protein S34                                                                                           |
| 0,95 | ZBTB43                    | zinc finger and BTB domain containing 43                                                                                      |
| 0,95 | SLC7A3                    | solute carrier family 7 (cationic amino acid transporter, y+ system), member 3                                                |
| 0,95 | TEX30                     | testis expressed 30                                                                                                           |
| 0,95 | ASXL1                     | additional sex combs like transcriptional regulator 1                                                                         |
| 0,95 | SLC41A2                   | solute carrier family 41 (magnesium transporter), member 2                                                                    |
| 0,95 | CLCA1                     | chloride channel accessory 1                                                                                                  |
| 0,95 | MRPS25                    | mitochondrial ribosomal protein S25                                                                                           |

|      |                                          |                                                                                                                                                  |
|------|------------------------------------------|--------------------------------------------------------------------------------------------------------------------------------------------------|
| 0,95 | PSMC3                                    | proteasome 26S subunit, ATPase 3                                                                                                                 |
| 0,95 | PRR9                                     | proline rich 9                                                                                                                                   |
| 0,95 | WHSC1L1                                  | Wolf-Hirschhorn syndrome candidate 1-like 1                                                                                                      |
| 0,95 | CNBD2                                    | cyclic nucleotide binding domain containing 2                                                                                                    |
| 0,95 | SRPK1                                    | SRSF protein kinase 1                                                                                                                            |
| 0,95 | SEMA4B                                   | sema domain, immunoglobulin domain (Ig), transmembrane domain (TM) and short cytoplasmic domain, (semaphorin) 4B                                 |
| 0,95 | DIDO1                                    | death inducer-obliterator 1                                                                                                                      |
| 0,95 | RAB40A                                   | RAB40A, member RAS oncogene family                                                                                                               |
| 0,95 | AAMP                                     | angio-associated migratory cell protein                                                                                                          |
| 0,95 | PPY                                      | pancreatic polypeptide                                                                                                                           |
| 0,95 | SH3PXD2B                                 | SH3 and PX domains 2B                                                                                                                            |
| 0,95 | IFT20                                    | intraflagellar transport 20                                                                                                                      |
| 0,95 | LGR6                                     | leucine-rich repeat containing G protein-coupled receptor 6                                                                                      |
| 0,95 | WNT3A                                    | wingless-type MMTV integration site family, member 3A                                                                                            |
| 0,95 | PAX3                                     | paired box 3                                                                                                                                     |
| 0,95 | HAPLN2                                   | hyaluronan and proteoglycan link protein 2                                                                                                       |
| 0,95 | ETAA1                                    | Ewing tumor-associated antigen 1                                                                                                                 |
| 0,95 | DDX4                                     | DEAD (Asp-Glu-Ala-Asp) box polypeptide 4                                                                                                         |
| 0,95 | OR2W1                                    | olfactory receptor, family 2, subfamily W, member 1                                                                                              |
| 0,95 | SYNPO2                                   | synaptopodin 2                                                                                                                                   |
| 0,95 | GRXCR2                                   | glutaredoxin, cysteine rich 2                                                                                                                    |
| 0,95 | ORM2                                     | orosomucoid 2                                                                                                                                    |
| 0,95 | ZNF440                                   | zinc finger protein 440                                                                                                                          |
| 0,95 | IL31RA                                   | interleukin 31 receptor A                                                                                                                        |
| 0,95 | SCARB2                                   | scavenger receptor class B, member 2                                                                                                             |
| 0,95 | MARCH6                                   | membrane associated ring finger 6                                                                                                                |
| 0,95 | TEKT2                                    | tektin 2 (testicular)                                                                                                                            |
| 0,95 | PCED1B                                   | PC-esterase domain containing 1B                                                                                                                 |
| 0,95 | RPL13;<br>SNORD68                        | ribosomal protein L13; small nucleolar RNA, C/D box 68                                                                                           |
| 0,95 | MTMR2                                    | myotubularin related protein 2                                                                                                                   |
| 0,95 | C2orf15andLIPT1<br>andMRPL30;<br>C2orf15 | Transcript Identified by AceView, Entrez Gene ID(s) 150590; 51601; 51263; chromosome 2 open reading frame 15 [Source:HGNC Symbol;Acc:HGNC:28436] |
| 0,95 | LSM6                                     | LSM6 homolog, U6 small nuclear RNA and mRNA degradation associated                                                                               |
| 0,95 | FBXO25                                   | F-box protein 25                                                                                                                                 |
| 0,95 | CASQ1                                    | calsequestrin 1 (fast-twitch, skeletal muscle)                                                                                                   |
| 0,95 | TEX2                                     | testis expressed 2                                                                                                                               |
| 0,95 | RBM45                                    | RNA binding motif protein 45                                                                                                                     |
| 0,95 | DEFB112                                  | defensin, beta 112                                                                                                                               |
| 0,95 | ATG16L1                                  | autophagy related 16-like 1                                                                                                                      |
| 0,95 | TMPRSS7                                  | transmembrane protease, serine 7                                                                                                                 |
| 0,95 | POLR2I                                   | polymerase (RNA) II (DNA directed) polypeptide I, 14.5kDa                                                                                        |

|      |                     |                                                                                                           |
|------|---------------------|-----------------------------------------------------------------------------------------------------------|
| 0,95 | SLC7A1              | solute carrier family 7 (cationic amino acid transporter, y+ system), member 1                            |
| 0,95 | GALNT15             | polypeptide N-acetylgalactosaminyltransferase 15                                                          |
| 0,95 | WDR26;<br>MIR4742   | WD repeat domain 26; microRNA 4742                                                                        |
| 0,95 | XRN1                | 5-3 exoribonuclease 1                                                                                     |
| 0,95 | NLRP5               | NLR family, pyrin domain containing 5                                                                     |
| 0,95 | ARRDC3              | arrestin domain containing 3                                                                              |
| 0,95 | MYO10               | myosin X                                                                                                  |
| 0,95 | FAM200B             | family with sequence similarity 200, member B                                                             |
| 0,95 | SSH3                | slingshot protein phosphatase 3                                                                           |
| 0,95 | GRHPR               | glyoxylate reductase/hydroxypyruvate reductase                                                            |
| 0,95 | AKAP10              | A kinase (PRKA) anchor protein 10                                                                         |
| 0,95 | CBLN2               | cerebellin 2 precursor                                                                                    |
| 0,95 | KLHL6               | kelch-like family member 6                                                                                |
| 0,95 | HVCN1               | hydrogen voltage gated channel 1                                                                          |
| 0,95 | TMEM30A             | transmembrane protein 30A                                                                                 |
| 0,95 | B3GNT6              | UDP-GlcNAc:betaGal beta-1,3-N-acetylglucosaminyltransferase 6                                             |
| 0,95 | NAGK                | N-acetylglucosamine kinase                                                                                |
| 0,95 | TUB                 | tubby bipartite transcription factor                                                                      |
| 0,95 | ARHGEF39            | Rho guanine nucleotide exchange factor 39                                                                 |
| 0,95 | WAPL                | WAPL cohesin release factor                                                                               |
| 0,95 | WDR83OS             | WD repeat domain 83 opposite strand                                                                       |
| 0,95 | FMN1                | Jeck2013 ANTISENSE, coding, INTERNAL, intronic best transcript NM_001103184                               |
| 0,95 | PREP                | prolyl endopeptidase                                                                                      |
| 0,95 | HNRNPL              | heterogeneous nuclear ribonucleoprotein L                                                                 |
| 0,95 | CTCF                | CCCTC-binding factor (zinc finger protein)                                                                |
| 0,95 | ZNF273              | zinc finger protein 273                                                                                   |
| 0,95 | SLC2A14             | solute carrier family 2 (facilitated glucose transporter), member 14                                      |
| 0,95 | SKOR2               | SKI family transcriptional corepressor 2                                                                  |
| 0,95 | UBE3C               | ubiquitin protein ligase E3C                                                                              |
| 0,95 | FBXW5               | F-box and WD repeat domain containing 5                                                                   |
| 0,95 | SPPL2A              | signal peptide peptidase like 2A                                                                          |
| 0,95 | RPA1                | replication protein A1                                                                                    |
| 0,95 | MED4                | mediator complex subunit 4                                                                                |
| 0,95 | OR10K1              | olfactory receptor, family 10, subfamily K, member 1                                                      |
| 0,95 | OR4K5               | olfactory receptor, family 4, subfamily K, member 5                                                       |
| 0,95 | MAPKAPK5;<br>ADAM1A | mitogen-activated protein kinase-activated protein kinase 5; ADAM metallopeptidase domain 1A (pseudogene) |
| 0,95 | LRRC57              | leucine rich repeat containing 57                                                                         |
| 0,95 | KIF26A              | kinesin family member 26A                                                                                 |
| 0,95 | SIK2                | salt-inducible kinase 2                                                                                   |
| 0,95 | HEATR5B             | HEAT repeat containing 5B                                                                                 |
| 0,95 | NAT2                | N-acetyltransferase 2 (arylamine N-acetyltransferase)                                                     |
| 0,95 | PAX5                | paired box 5                                                                                              |
| 0,95 | AFM                 | afamin                                                                                                    |

|      |                      |                                                                                                 |
|------|----------------------|-------------------------------------------------------------------------------------------------|
| 0,95 | WDR6                 | WD repeat domain 6                                                                              |
| 0,95 | PITHD1               | PITH (C-terminal proteasome-interacting domain of thioredoxin-like) domain containing 1         |
| 0,95 | RPL9                 | ribosomal protein L9                                                                            |
| 0,95 | GRN                  | granulin                                                                                        |
| 0,95 | NFIB                 | nuclear factor I/B                                                                              |
| 0,95 | CHN1                 | chimerin 1                                                                                      |
| 0,95 | LGALS8-AS1           | LGALS8 antisense RNA 1                                                                          |
| 0,95 | USP32                | ubiquitin specific peptidase 32                                                                 |
| 0,95 | MAGEA8               | MAGE family member A8                                                                           |
| 0,95 | JMJD1C-AS1           | JMJD1C antisense RNA 1                                                                          |
| 0,95 | C1orf56              | chromosome 1 open reading frame 56                                                              |
| 0,95 | CLEC18A              | C-type lectin domain family 18, member A                                                        |
| 0,95 | PHTF1                | putative homeodomain transcription factor 1                                                     |
| 0,95 | SIGLEC14;<br>SIGLEC5 | sialic acid binding Ig-like lectin 14; sialic acid binding Ig-like lectin 5                     |
| 0,95 | GPANK1               | G-patch domain and ankyrin repeats 1                                                            |
| 0,95 | SUMO3                | small ubiquitin-like modifier 3                                                                 |
| 0,95 | EPHA6                | EPH receptor A6                                                                                 |
| 0,95 | ZNF501               | zinc finger protein 501 [Source:HGNC Symbol;Acc:HGNC:23717]                                     |
| 0,95 | SCD5                 | stearoyl-CoA desaturase 5                                                                       |
| 0,95 | TTI2                 | TELO2 interacting protein 2                                                                     |
| 0,95 | CXCR6                | chemokine (C-X-C motif) receptor 6                                                              |
| 0,95 | CLTC                 | clathrin, heavy chain (Hc)                                                                      |
| 0,95 | GEMIN8               | gem nuclear organelle associated protein 8                                                      |
| 0,95 | FSCN1                | fascin actin-bundling protein 1                                                                 |
| 0,95 | MCM2                 | minichromosome maintenance complex component 2                                                  |
| 0,95 | MAZ                  | MYC-associated zinc finger protein (purine-binding transcription factor)                        |
| 0,95 | TLX1                 | T-cell leukemia homeobox 1                                                                      |
| 0,95 | MOCOS                | molybdenum cofactor sulfurase                                                                   |
| 0,95 | CPSF2                | cleavage and polyadenylation specific factor 2                                                  |
| 0,95 | PRAMEF9              | PRAME family member 9                                                                           |
| 0,95 | RAD17                | RAD17 checkpoint clamp loader component                                                         |
| 0,95 | TASP1                | taspase 1                                                                                       |
| 0,95 | NAB2                 | NGFI-A binding protein 2 (EGR1 binding protein 2)                                               |
| 0,95 | CCT8                 | chaperonin containing TCP1, subunit 8 (theta)                                                   |
| 0,95 | TDRD3                | tudor domain containing 3                                                                       |
| 0,95 | UXS1                 | UDP-glucuronate decarboxylase 1                                                                 |
| 0,95 | ZBTB24               | zinc finger and BTB domain containing 24                                                        |
| 0,95 | KCNN4                | potassium channel, calcium activated intermediate/small conductance subfamily N alpha, member 4 |
| 0,95 | LINC01588            | long intergenic non-protein coding RNA 1588                                                     |
| 0,95 | ZSCAN32              | zinc finger and SCAN domain containing 32                                                       |
| 0,95 | EN1                  | engrailed homeobox 1                                                                            |
| 0,95 | BCO2; RPS12P21       | beta-carotene oxygenase 2; ribosomal protein S12 pseudogene 21                                  |
| 0,95 | CPSF3                | cleavage and polyadenylation specific factor 3                                                  |

|      |                                        |                                                                                                                                         |
|------|----------------------------------------|-----------------------------------------------------------------------------------------------------------------------------------------|
| 0,95 | CCBE1                                  | Jeck2013 ALT_ACCEPTOR, ALT_DONOR, coding, INTERNAL, intronic best transcript NM_133459                                                  |
| 0,95 | CHMP5                                  | charged multivesicular body protein 5                                                                                                   |
| 0,95 | LGR4                                   | leucine-rich repeat containing G protein-coupled receptor 4                                                                             |
| 0,95 | DIO1                                   | deiodinase, iodothyronine, type I                                                                                                       |
| 0,95 | MDFIC                                  | MyoD family inhibitor domain containing                                                                                                 |
| 0,95 | SERF1B;<br>SERF1A                      | small EDRK-rich factor 1B (centromeric); small EDRK rich factor 1A (telomeric)                                                          |
| 0,95 | SERF1A                                 | small EDRK-rich factor 1A (telomeric)                                                                                                   |
| 0,95 | HERC1                                  | HECT and RLD domain containing E3 ubiquitin protein ligase family member 1                                                              |
| 0,95 | RP11-67L3.5;<br>RP11-67L3.4;<br>TMEM61 | novel transcript; Transcript Identified by AceView, Entrez Gene ID(s) 199964                                                            |
| 0,95 | TIGD5                                  | tigger transposable element derived 5                                                                                                   |
| 0,95 | SHMT1;<br>MIR6778                      | serine hydroxymethyltransferase 1 (soluble); microRNA 6778                                                                              |
| 0,95 | DEPDC1                                 | DEP domain containing 1                                                                                                                 |
| 0,95 | DNALI1                                 | dynein, axonemal, light intermediate chain 1                                                                                            |
| 0,95 | FOXI3                                  | forkhead box I3                                                                                                                         |
| 0,95 | SAMM50                                 | SAMM50 sorting and assembly machinery component                                                                                         |
| 0,95 | IL22RA1                                | interleukin 22 receptor, alpha 1                                                                                                        |
| 0,95 | FOXE1                                  | forkhead box E1                                                                                                                         |
| 0,95 | BCL2L13                                | BCL2-like 13 (apoptosis facilitator)                                                                                                    |
| 0,95 | ZNF730                                 | zinc finger protein 730                                                                                                                 |
| 0,95 | RBP4                                   | retinol binding protein 4, plasma                                                                                                       |
| 0,95 | DEFB106A                               | defensin, beta 106A                                                                                                                     |
| 0,95 | SPAG8                                  | sperm associated antigen 8                                                                                                              |
| 0,95 | GGA2                                   | golgi-associated, gamma adaptin ear containing, ARF binding protein 2                                                                   |
| 0,95 | SGCE                                   | sarcoglycan epsilon                                                                                                                     |
| 0,95 | PLEKHA8                                | pleckstrin homology domain containing, family A (phosphoinositide binding specific) member 8                                            |
| 0,95 | MTHFD1                                 | methylenetetrahydrofolate dehydrogenase (NADP+ dependent) 1, methenyltetrahydrofolate cyclohydrolase, formyltetrahydrofolate synthetase |
| 0,95 | ASS1                                   | argininosuccinate synthase 1                                                                                                            |
| 0,95 | CRISPLD2                               | cysteine-rich secretory protein LCCL domain containing 2                                                                                |
| 0,95 | SP6                                    | Sp6 transcription factor                                                                                                                |
| 0,95 | HLA-DMB                                | major histocompatibility complex, class II, DM beta                                                                                     |
| 0,95 | TRAPPC3                                | trafficking protein particle complex 3                                                                                                  |
| 0,95 | COL4A3                                 | collagen, type IV, alpha 3 (Goodpasture antigen)                                                                                        |
| 0,95 | HIC1                                   | hypermethylated in cancer 1                                                                                                             |
| 0,95 | PYM1                                   | PYM homolog 1, exon junction complex associated factor                                                                                  |
| 0,95 | ATP4A                                  | ATPase, H <sup>+</sup> /K <sup>+</sup> exchanging, alpha polypeptide                                                                    |
| 0,95 | SPG7                                   | spastic paraplegia 7 (pure and complicated autosomal recessive)                                                                         |

|      |                    |                                                                             |
|------|--------------------|-----------------------------------------------------------------------------|
| 0,95 | C6orf118           | chromosome 6 open reading frame 118                                         |
| 0,95 | ING5               | inhibitor of growth family member 5                                         |
| 0,95 | TCF19              | transcription factor 19                                                     |
| 0,95 | PIAS2              | protein inhibitor of activated STAT 2                                       |
| 0,95 | UMODL1-AS1         | UMODL1 antisense RNA 1                                                      |
| 0,95 | RASSF8             | Ras association (RalGDS/AF-6) domain family (N-terminal) member 8           |
| 0,95 | PASD1              | PAS domain containing 1                                                     |
| 0,95 | LINC00272          | long intergenic non-protein coding RNA 272                                  |
| 0,95 | SAG                | S-antigen; retina and pineal gland (arrestin)                               |
| 0,95 | MYO3B              | myosin IIIB                                                                 |
| 0,95 | COL17A1;<br>MIR936 | collagen, type XVII, alpha 1; microRNA 936                                  |
| 0,95 | DUSP10             | dual specificity phosphatase 10                                             |
| 0,95 | TRIAP1             | TP53 regulated inhibitor of apoptosis 1                                     |
| 0,95 | TMEM190            | transmembrane protein 190                                                   |
| 0,95 | TRIM27             | tripartite motif containing 27                                              |
| 0,95 | MAPRE3             | microtubule-associated protein, RP/EB family, member 3                      |
| 0,95 | ERH                | enhancer of rudimentary homolog (Drosophila)                                |
| 0,95 | ZNF423             | zinc finger protein 423                                                     |
| 0,95 | SPEM1              | spermatid maturation 1                                                      |
| 0,95 | MR1                | major histocompatibility complex, class I-related                           |
| 0,95 | SURF2              | surfeit 2 [Source:HGNC Symbol;Acc:HGNC:11475]                               |
| 0,95 | PLEKHF1            | pleckstrin homology domain containing, family F (with FYVE domain) member 1 |
| 0,95 | FAM122B            | family with sequence similarity 122B                                        |
| 0,95 | RIBC2              | RIB43A domain with coiled-coils 2                                           |
| 0,95 | FOXQ1              | forkhead box Q1                                                             |
| 0,95 | PHKA2              | phosphorylase kinase, alpha 2 (liver)                                       |
| 0,95 | TBC1D22A           | TBC1 domain family, member 22A                                              |
| 0,95 | IFT81              | intraflagellar transport 81                                                 |
| 0,95 | NMB                | neuromedin B                                                                |
| 0,95 | CADM3              | cell adhesion molecule 3                                                    |
| 0,95 | OAZ2               | ornithine decarboxylase antizyme 2                                          |
| 0,95 | SUN5               | Sad1 and UNC84 domain containing 5                                          |
| 0,95 | RFTN1              | raftlin, lipid raft linker 1                                                |
| 0,95 | ZNF546             | zinc finger protein 546                                                     |
| 0,95 | PDCD10             | programmed cell death 10                                                    |
| 0,95 | FDX1               | ferredoxin 1                                                                |
| 0,95 | CENPI              | centromere protein I                                                        |
| 0,95 | NEK3               | NIMA-related kinase 3                                                       |
| 0,95 | ICOSLG             | inducible T-cell co-stimulator ligand                                       |
| 0,95 | PDCD7              | programmed cell death 7                                                     |
| 0,95 | SREK1IP1           | SREK1-interacting protein 1                                                 |
| 0,95 | SLC38A8            | solute carrier family 38, member 8                                          |
| 0,95 | ZNF257             | zinc finger protein 257                                                     |
| 0,95 | TMBIM4             | transmembrane BAX inhibitor motif containing 4                              |
| 0,95 | WDR44              | WD repeat domain 44                                                         |
| 0,95 | BOK                | BCL2-related ovarian killer                                                 |

|      |                         |                                                                                                       |
|------|-------------------------|-------------------------------------------------------------------------------------------------------|
| 0,95 | EVI5L                   | ecotropic viral integration site 5-like                                                               |
| 0,95 | C11orf58                | chromosome 11 open reading frame 58                                                                   |
| 0,95 | RPS25                   | ribosomal protein S25                                                                                 |
| 0,95 | P2RY2                   | purinergic receptor P2Y, G-protein coupled, 2                                                         |
| 0,95 | KIF5B                   | kinesin family member 5B                                                                              |
| 0,95 | WDR90                   | WD repeat domain 90                                                                                   |
| 0,95 | PRKCA                   | Jeck2013 ALT_ACCEPTOR, ALT_DONOR, coding, INTERNAL, intronic best transcript NM_002737                |
| 0,95 | SORCS2                  | sortilin-related VPS10 domain containing receptor 2                                                   |
| 0,95 | LEXM                    | lymphocyte expansion molecule                                                                         |
| 0,95 | AP2S1                   | adaptor-related protein complex 2 sigma 1 subunit                                                     |
| 0,95 | ALPL                    | alkaline phosphatase, liver/bone/kidney                                                               |
| 0,95 | PAXIP1                  | PAX interacting (with transcription-activation domain) protein 1                                      |
| 0,95 | KLF2                    | Kruppel-like factor 2                                                                                 |
| 0,95 | ELAVL3                  | ELAV like neuron-specific RNA binding protein 3                                                       |
| 0,95 | CLUAP1                  | clusterin associated protein 1                                                                        |
| 0,95 | FLJ33534;<br>AC062028.1 | uncharacterized LOC285150; uncharacterized LOC285150 [Source:EntrezGene;Acc:285150]; novel transcript |
| 0,95 | NPIP4                   | nuclear pore complex interacting protein family, member B4                                            |
| 0,95 | CT45A7;<br>CT45A6       | cancer/testis antigen family 45, member A7;<br>cancer/testis antigen family 45, member A6             |
| 0,95 | CCR8                    | chemokine (C-C motif) receptor 8                                                                      |
| 0,95 | XXYL1                   | xyloside xylosyltransferase 1                                                                         |
| 0,95 | STK31                   | serine/threonine kinase 31                                                                            |
| 0,95 | OR1A1                   | olfactory receptor, family 1, subfamily A, member 1                                                   |
| 0,95 | HIST3H2A                | histone cluster 3, H2a                                                                                |
| 0,95 | EHD1                    | EH domain containing 1                                                                                |
| 0,95 | HCN3                    | hyperpolarization activated cyclic nucleotide gated potassium channel 3                               |
| 0,95 | INVS                    | inversin                                                                                              |
| 0,95 | SLC4A1                  | solute carrier family 4 (anion exchanger), member 1 (Diego blood group)                               |
| 0,95 | BRI3BP                  | BRI3 binding protein                                                                                  |
| 0,95 | C2orf76                 | chromosome 2 open reading frame 76                                                                    |
| 0,95 | OTUD1                   | OTU deubiquitinase 1                                                                                  |
| 0,95 | SNUPN                   | snurportin 1                                                                                          |
| 0,95 | RAPGEF1                 | Rap guanine nucleotide exchange factor 1                                                              |
| 0,95 | SNRPG                   | small nuclear ribonucleoprotein polypeptide G                                                         |
| 0,95 | REXO1L11P               | REX1, RNA exonuclease 1 homolog-like 11, pseudogene                                                   |
| 0,95 | SMAD1                   | SMAD family member 1                                                                                  |
| 0,95 | DROSHA                  | drosha, ribonuclease type III                                                                         |
| 0,95 | C16orf72                | Memczak2013 ANTISENSE, coding, INTERNAL, intronic best transcript NM_014117                           |
| 0,95 | PPP1R12C                | protein phosphatase 1, regulatory subunit 12C                                                         |
| 0,95 | GNAL                    | guanine nucleotide binding protein (G protein), alpha activating activity polypeptide, olfactory type |

|      |                                             |                                                                                                           |
|------|---------------------------------------------|-----------------------------------------------------------------------------------------------------------|
| 0,95 | FAR1                                        | fatty acyl CoA reductase 1                                                                                |
| 0,95 | MAP3K7                                      | mitogen-activated protein kinase kinase kinase 7                                                          |
| 0,95 | HELB                                        | helicase (DNA) B                                                                                          |
| 0,95 | ZNF627                                      | zinc finger protein 627                                                                                   |
| 0,95 | RNPEPL1                                     | arginyl aminopeptidase (aminopeptidase B)-like 1                                                          |
| 0,95 | CRIM1                                       | cysteine rich transmembrane BMP regulator 1 (chordin-like)                                                |
| 0,95 | ARL14EP                                     | ADP-ribosylation factor like GTPase 14 effector protein                                                   |
| 0,95 | GEMIN6                                      | gem nuclear organelle associated protein 6                                                                |
| 0,95 | WBSR17                                      | Williams-Beuren syndrome chromosome region 17                                                             |
| 0,95 | SCMH1                                       | sex comb on midleg homolog 1 (Drosophila)                                                                 |
| 0,95 | DEFB106B;<br>DEFB106A                       | defensin, beta 106B; defensin, beta 106A                                                                  |
| 0,95 | MAGEA3                                      | MAGE family member A3                                                                                     |
| 0,95 | CDR2L                                       | cerebellar degeneration-related protein 2-like                                                            |
| 0,95 | ALDH9A1                                     | aldehyde dehydrogenase 9 family, member A1                                                                |
| 0,95 | CTNNB1                                      | catenin (cadherin-associated protein), beta 1                                                             |
| 0,95 | FAM53C                                      | family with sequence similarity 53, member C                                                              |
| 0,95 | MFS12                                       | major facilitator superfamily domain containing 12                                                        |
| 0,95 | DAZ3                                        | deleted in azoospermia 3                                                                                  |
| 0,95 | RPL41P1                                     | ribosomal protein L41 pseudogene 1                                                                        |
| 0,95 | CADM2                                       | cell adhesion molecule 2                                                                                  |
| 0,95 | PGA4                                        | pepsinogen 4, group I (pepsinogen A)                                                                      |
| 0,95 | LOC100129924;<br>C1orf50; RP5-<br>994D16.11 | uncharacterized LOC100129924; Transcript Identified by AceView, Entrez Gene ID(s) 79078; novel transcript |
| 0,95 | TLK2                                        | tousled-like kinase 2                                                                                     |
| 0,95 | GDF2                                        | growth differentiation factor 2                                                                           |
| 0,95 | UBTF                                        | upstream binding transcription factor, RNA polymerase I                                                   |
| 0,95 | MRPS9                                       | mitochondrial ribosomal protein S9                                                                        |
| 0,95 | PTCH2                                       | patched 2                                                                                                 |
| 0,95 | PNMAL2                                      | paraneoplastic Ma antigen family-like 2                                                                   |
| 0,95 | ADSL                                        | adenylosuccinate lyase                                                                                    |
| 0,95 | GPR135                                      | G protein-coupled receptor 135                                                                            |
| 0,95 | CLCA4                                       | chloride channel accessory 4                                                                              |
| 0,95 | NEK4                                        | NIMA-related kinase 4                                                                                     |
| 0,95 | GPRIN1                                      | G protein regulated inducer of neurite outgrowth 1                                                        |
| 0,95 | KNCN                                        | kinocilin                                                                                                 |
| 0,95 | HNRNPA3;<br>MIR4444-2;<br>MIR4444-1         | heterogeneous nuclear ribonucleoprotein A3; microRNA 4444-2; microRNA 4444-1                              |
| 0,95 | SIKE1                                       | suppressor of IKBKE 1                                                                                     |
| 0,95 | TMED1                                       | transmembrane p24 trafficking protein 1                                                                   |
| 0,95 | FAM219B                                     | family with sequence similarity 219, member B                                                             |
| 0,95 | SLC22A14                                    | solute carrier family 22, member 14                                                                       |
| 0,95 | FAM175B                                     | family with sequence similarity 175, member B                                                             |
| 0,95 | ZNF597                                      | zinc finger protein 597                                                                                   |
| 0,95 | RPL7A                                       | ribosomal protein L7a                                                                                     |

|      |                                   |                                                                                                                             |
|------|-----------------------------------|-----------------------------------------------------------------------------------------------------------------------------|
| 0,95 | SNX16                             | sorting nexin 16                                                                                                            |
| 0,95 | SSX2IP                            | synovial sarcoma, X breakpoint 2 interacting protein                                                                        |
| 0,95 | RRM2                              | ribonucleotide reductase M2                                                                                                 |
| 0,95 | ATPIF1                            | ATPase inhibitory factor 1                                                                                                  |
| 0,95 | FMR1                              | fragile X mental retardation 1                                                                                              |
| 0,95 | NDUFA8                            | NADH dehydrogenase (ubiquinone) 1 alpha subcomplex, 8, 19kDa                                                                |
| 0,95 | EN2                               | engrailed homeobox 2                                                                                                        |
| 0,95 | ITGA8                             | integrin alpha 8                                                                                                            |
| 0,95 | CDK5                              | cyclin-dependent kinase 5                                                                                                   |
| 0,95 | RNF225                            | ring finger protein 225                                                                                                     |
| 0,95 | TMEM14C                           | transmembrane protein 14C                                                                                                   |
| 0,95 | NQO1                              | NAD(P)H dehydrogenase, quinone 1                                                                                            |
| 0,95 | CLIC6                             | chloride intracellular channel 6                                                                                            |
| 0,95 | WRB                               | tryptophan rich basic protein                                                                                               |
| 0,95 | PCCB                              | propionyl-CoA carboxylase beta subunit                                                                                      |
| 0,95 | PPFIA1                            | protein tyrosine phosphatase, receptor type, f polypeptide (PTPRF), interacting protein (liprin), alpha 1                   |
| 0,95 | OCIAD1                            | OCIA domain containing 1                                                                                                    |
| 0,95 | IP6K1                             | inositol hexakisphosphate kinase 1                                                                                          |
| 0,95 | MAGI3                             | membrane associated guanylate kinase, WW and PDZ domain containing 3                                                        |
| 0,95 | TRIML2                            | tripartite motif family like 2                                                                                              |
| 0,95 | DGCR8                             | Memczak2013 ALT_ACCEPTOR, ALT_DONOR, coding, INTERNAL, intronic best transcript NM_022720                                   |
| 0,95 | USP44                             | ubiquitin specific peptidase 44                                                                                             |
| 0,95 | MBLAC2                            | metallo-beta-lactamase domain containing 2                                                                                  |
| 0,95 | SLC35G5                           | solute carrier family 35, member G5                                                                                         |
| 0,95 | CMAS                              | cytidine monophosphate N-acetylneuraminic acid synthetase                                                                   |
| 0,95 | CAMKK1                            | calcium/calmodulin-dependent protein kinase kinase 1, alpha                                                                 |
| 0,95 | MED22                             | mediator complex subunit 22                                                                                                 |
| 0,95 | RP11-517A5.5; NOMO3; RP11-517A5.4 | NODAL modulator 3 [Source:HGNC Symbol;Acc:HGNC:25242]; novel transcript, antisense to NOMO3; RP11-517A5.4 (from geneSymbol) |
| 0,95 | MLEC                              | malectin                                                                                                                    |
| 0,95 | SEC61A1                           | Sec61 translocon alpha 1 subunit                                                                                            |
| 0,95 | ZCCHC12                           | zinc finger, CCHC domain containing 12                                                                                      |
| 0,95 | ZC3HAV1L                          | zinc finger CCCH-type, antiviral 1-like                                                                                     |
| 0,95 | SECISBP2                          | SECIS binding protein 2                                                                                                     |
| 0,95 | LRRC53                            | leucine rich repeat containing 53                                                                                           |
| 0,95 | ANO8                              | anoctamin 8                                                                                                                 |
| 0,95 | CNPY3                             | Memczak2013 ALT_ACCEPTOR, ALT_DONOR, coding, INTERNAL, intronic best transcript NM_006586                                   |
| 0,95 | DNAJC24                           | DnaJ (Hsp40) homolog, subfamily C, member 24                                                                                |

|      |            |                                                                                        |
|------|------------|----------------------------------------------------------------------------------------|
| 0,95 | DDOST      | dolichyl-diphosphooligosaccharide--protein glycosyltransferase subunit (non-catalytic) |
| 0,95 | RUSC2      | RUN and SH3 domain containing 2                                                        |
| 0,95 | CDC25B     | cell division cycle 25B                                                                |
| 0,95 | KRTAP2-4   | keratin associated protein 2-4                                                         |
| 0,95 | VWC2       | von Willebrand factor C domain containing 2                                            |
| 0,95 | CXCL17     | chemokine (C-X-C motif) ligand 17                                                      |
| 0,95 | MPC2       | mitochondrial pyruvate carrier 2                                                       |
| 0,95 | PAQR7      | progesterin and adipoQ receptor family member VII                                      |
| 0,95 | RBFOX1     | RNA binding protein, fox-1 homolog (C. elegans) 1                                      |
| 0,95 | ARPP21     | Transcript Identified by AceView, Entrez Gene ID(s) 10777                              |
| 0,95 | TMED4      | transmembrane p24 trafficking protein 4                                                |
| 0,95 | MB21D1     | Mab-21 domain containing 1                                                             |
| 0,95 | CDH22      | cadherin 22, type 2                                                                    |
| 0,95 | RPS14      | ribosomal protein S14                                                                  |
| 0,95 | PFN2       | profilin 2                                                                             |
| 0,95 | TIE1       | tyrosine kinase with immunoglobulin-like and EGF-like domains 1                        |
| 0,95 | EFTUD1     | elongation factor Tu GTP binding domain containing 1                                   |
| 0,95 | TSPAN12    | tetraspanin 12                                                                         |
| 0,95 | FLT3       | fms-related tyrosine kinase 3                                                          |
| 0,95 | ZNF562     | zinc finger protein 562                                                                |
| 0,95 | WLS        | wntless Wnt ligand secretion mediator                                                  |
| 0,95 | IER5       | immediate early response 5                                                             |
| 0,95 | CRH        | corticotropin releasing hormone                                                        |
| 0,95 | DCXR       | dicarbonyl/L-xylulose reductase                                                        |
| 0,95 | UGP2       | UDP-glucose pyrophosphorylase 2                                                        |
| 0,95 | PDE8B      | phosphodiesterase 8B                                                                   |
| 0,95 | GOLM1      | golgi membrane protein 1                                                               |
| 0,95 | FSTL4      | follicle-stimulating hormone-like 4                                                    |
| 0,95 | FAM155A    | family with sequence similarity 155, member A                                          |
| 0,95 | PPP1R14B   | protein phosphatase 1, regulatory (inhibitor) subunit 14B                              |
| 0,95 | PPIL4      | peptidylprolyl isomerase (cyclophilin)-like 4                                          |
| 0,95 | C1orf109   | chromosome 1 open reading frame 109                                                    |
| 0,95 | PIK3CD-AS2 | PIK3CD antisense RNA 2                                                                 |
| 0,95 | PDXK       | pyridoxal (pyridoxine, vitamin B6) kinase                                              |
| 0,95 | ZNF747     | zinc finger protein 747                                                                |
| 0,95 | IGFBPL1    | insulin like growth factor binding protein-like 1                                      |
| 0,95 | MIIP       | migration and invasion inhibitory protein                                              |
| 0,95 | MEAF6      | MYST/Esa1-associated factor 6                                                          |
| 0,95 | TXNDC17    | thioredoxin domain containing 17                                                       |
| 0,95 | FCHO1      | FCH domain only 1                                                                      |
| 0,95 | SYT8       | synaptobrevin VIII                                                                     |
| 0,95 | GPR75      | G protein-coupled receptor 75                                                          |
| 0,95 | MEA1       | male-enhanced antigen 1                                                                |
| 0,95 | KDM4C      | lysine (K)-specific demethylase 4C                                                     |

|      |                    |                                                                                         |
|------|--------------------|-----------------------------------------------------------------------------------------|
| 0,95 | GNAI2              | guanine nucleotide binding protein (G protein), alpha inhibiting activity polypeptide 2 |
| 0,95 | DPM3               | dolichyl-phosphate mannosyltransferase polypeptide 3                                    |
| 0,95 | GIMAP7             | GTPase, IMAP family member 7                                                            |
| 0,95 | PUM3               | pumilio RNA binding family member 3                                                     |
| 0,95 | CRYAA              | crystallin alpha A                                                                      |
| 0,95 | CYR61              | cysteine-rich, angiogenic inducer, 61                                                   |
| 0,95 | CCAR2              | cell cycle and apoptosis regulator 2                                                    |
| 0,95 | UGT2B4             | UDP glucuronosyltransferase 2 family, polypeptide B4                                    |
| 0,95 | DMRTC1B;<br>DMRTC1 | DMRT-like family C1B; DMRT-like family C1                                               |
| 0,95 | JPH4               | junctophilin 4                                                                          |
| 0,95 | DUSP19             | dual specificity phosphatase 19                                                         |
| 0,95 | QDPR               | quinoid dihydropteridine reductase                                                      |
| 0,95 | COX5B              | cytochrome c oxidase subunit Vb                                                         |
| 0,95 | GTF3C6             | general transcription factor IIIC subunit 6                                             |
| 0,95 | PBX1               | pre-B-cell leukemia homeobox 1                                                          |
| 0,95 | GAB1               | GRB2-associated binding protein 1                                                       |
| 0,95 | CCDC71             | coiled-coil domain containing 71                                                        |
| 0,95 | DKKL1              | dickkopf-like 1                                                                         |
| 0,95 | PRPF31             | pre-mRNA processing factor 31                                                           |
| 0,95 | POLL               | polymerase (DNA directed), lambda                                                       |
| 0,95 | AZU1               | azurocidin 1                                                                            |
| 0,95 | NAIF1              | nuclear apoptosis inducing factor 1                                                     |
| 0,95 | RPL41P2            | ribosomal protein L41 pseudogene 2                                                      |
| 0,95 | ABL1               | ABL proto-oncogene 1, non-receptor tyrosine kinase                                      |
| 0,95 | ULBP1              | UL16 binding protein 1                                                                  |
| 0,95 | GMEB1              | glucocorticoid modulatory element binding protein 1                                     |
| 0,95 | ANAPC16            | anaphase promoting complex subunit 16                                                   |
| 0,95 | PIKFYVE            | phosphoinositide kinase, FYVE finger containing                                         |
| 0,95 | RFC2               | replication factor C subunit 2                                                          |
| 0,95 | GTDC1              | glycosyltransferase like domain containing 1                                            |
| 0,95 | FLT3LG             | fms-related tyrosine kinase 3 ligand                                                    |
| 0,95 | KIF22              | kinesin family member 22                                                                |
| 0,95 | EIF6               | eukaryotic translation initiation factor 6                                              |
| 0,95 | MGST3              | microsomal glutathione S-transferase 3                                                  |
| 0,95 | FOXD1              | forkhead box D1                                                                         |
| 0,95 | MFNG               | MFNG O-fucosylpeptide 3-beta-N-acetylglucosaminyltransferase                            |
| 0,95 | TXK                | TXK tyrosine kinase                                                                     |
| 0,95 | TSPY10             | testis specific protein, Y-linked 10                                                    |
| 0,95 | DEPDC5             | DEP domain containing 5                                                                 |
| 0,95 | IKBKB              | inhibitor of kappa light polypeptide gene enhancer in B-cells, kinase beta              |
| 0,95 | RHOV               | ras homolog family member V                                                             |
| 0,95 | YEATS2             | YEATS domain containing 2                                                               |
| 0,95 | OSBPL2             | oxysterol binding protein-like 2                                                        |
| 0,95 | CYBRD1             | cytochrome b reductase 1                                                                |

|      |               |                                                                                                            |
|------|---------------|------------------------------------------------------------------------------------------------------------|
| 0,95 | ZNF19         | zinc finger protein 19                                                                                     |
| 0,95 | OR51A2        | olfactory receptor, family 51, subfamily A, member 2                                                       |
| 0,95 | MEX3C         | mex-3 RNA binding family member C                                                                          |
| 0,95 | SRRT          | serrate, RNA effector molecule                                                                             |
| 0,95 | CCDC67        | coiled-coil domain containing 67                                                                           |
| 0,95 | SEC14L5       | SEC14-like lipid binding 5                                                                                 |
| 0,95 | SLC12A9       | solute carrier family 12, member 9                                                                         |
| 0,95 | PRKRIR        | protein-kinase, interferon-inducible double stranded RNA dependent inhibitor, repressor of (P58 repressor) |
| 0,95 | EEF2; SNORD37 | eukaryotic translation elongation factor 2; small nucleolar RNA, C/D box 37                                |
| 0,95 | SAPCD2        | suppressor APC domain containing 2                                                                         |
| 0,95 | ANKS6         | ankyrin repeat and sterile alpha motif domain containing 6                                                 |
| 0,95 | KCND2         | potassium channel, voltage gated Shal related subfamily D, member 2                                        |
| 0,95 | C7orf25       | chromosome 7 open reading frame 25                                                                         |
| 0,95 | POLR3D        | polymerase (RNA) III (DNA directed) polypeptide D, 44kDa                                                   |
| 0,95 | PPCS; CCDC30  | phosphopantothencysteine synthetase; coiled-coil domain containing 30                                      |
| 0,95 | RAP1GDS1      | RAP1, GTP-GDP dissociation stimulator 1                                                                    |
| 0,95 | C8A           | complement component 8, alpha polypeptide                                                                  |
| 0,95 | ZNF439        | zinc finger protein 439                                                                                    |
| 0,95 | CDKL2         | cyclin-dependent kinase-like 2 (CDC2-related kinase)                                                       |
| 0,95 | CTSG          | cathepsin G                                                                                                |
| 0,95 | C4orf50       | chromosome 4 open reading frame 50                                                                         |
| 0,95 | MAT1A         | methionine adenosyltransferase I, alpha                                                                    |
| 0,95 | SURF4         | surfeit 4                                                                                                  |
| 0,95 | ATP10D        | ATPase, class V, type 10D                                                                                  |
| 0,95 | HEXDC         | hexosaminidase (glycosyl hydrolase family 20, catalytic domain) containing                                 |
| 0,95 | BBX           | Memczak2013 ANTISENSE, coding, INTERNAL, intronic best transcript NM_020235                                |
| 0,95 | TRIM63        | tripartite motif containing 63, E3 ubiquitin protein ligase                                                |
| 0,95 | NUDT13        | nudix hydrolase 13                                                                                         |
| 0,95 | E2F4          | E2F transcription factor 4, p107/p130-binding                                                              |
| 0,95 | CABS1         | calcium-binding protein, spermatid-specific 1                                                              |
| 0,95 | PITX1         | paired-like homeodomain 1                                                                                  |
| 0,95 | UBE2D3        | ubiquitin conjugating enzyme E2D 3                                                                         |
| 0,95 | SLC41A1       | solute carrier family 41 (magnesium transporter), member 1                                                 |
| 0,95 | PRPF40B       | PRP40 homolog, pre-mRNA processing factor B                                                                |
| 0,95 | RAB9A         | RAB9A, member RAS oncogene family                                                                          |
| 0,95 | SNX5          | Jeck2013 ALT_DONOR, coding, INTERNAL, intronic best transcript NM_152227                                   |
| 0,95 | CLU; MIR6843  | clusterin; microRNA 6843                                                                                   |
| 0,95 | ATXN7L2       | ataxin 7-like 2                                                                                            |

|      |           |                                                                                             |
|------|-----------|---------------------------------------------------------------------------------------------|
| 0,95 | STX18     | syntaxin 18                                                                                 |
| 0,95 | FAAP24    | Fanconi anemia core complex associated protein 24                                           |
| 0,95 | TRIM44    | tripartite motif containing 44                                                              |
| 0,95 | TMEM135   | transmembrane protein 135                                                                   |
| 0,95 | EXTL3     | exostosin-like glycosyltransferase 3                                                        |
| 0,95 | SLC2A3    | solute carrier family 2 (facilitated glucose transporter), member 3                         |
| 0,95 | PRPF18    | pre-mRNA processing factor 18                                                               |
| 0,95 | RWDD1     | RWD domain containing 1                                                                     |
| 0,95 | FBL       | fibrillarin                                                                                 |
| 0,95 | ZNF484    | zinc finger protein 484                                                                     |
| 0,95 | SLC25A5   | solute carrier family 25 (mitochondrial carrier; adenine nucleotide translocator), member 5 |
| 0,95 | ZNF649    | zinc finger protein 649                                                                     |
| 0,95 | NDUFA11   | NADH dehydrogenase (ubiquinone) 1 alpha subcomplex, 11, 14.7kDa                             |
| 0,95 | ZNF91     | zinc finger protein 91                                                                      |
| 0,95 | CRLS1     | cardiolipin synthase 1                                                                      |
| 0,95 | KDEL2     | KDEL (Lys-Asp-Glu-Leu) containing 2                                                         |
| 0,95 | MOV10L1   | Mov10 RISC complex RNA helicase like 1                                                      |
| 0,95 | KIAA1257  | KIAA1257                                                                                    |
| 0,95 | HTRA2     | HtrA serine peptidase 2                                                                     |
| 0,95 | FCHO2     | FCH domain only 2                                                                           |
| 0,95 | TXNDC15   | thioredoxin domain containing 15                                                            |
| 0,95 | FOXD4L1   | forkhead box D4-like 1                                                                      |
| 0,95 | GPD2      | glycerol-3-phosphate dehydrogenase 2                                                        |
| 0,95 | ALDH8A1   | aldehyde dehydrogenase 8 family, member A1                                                  |
| 0,95 | LINC00269 | long intergenic non-protein coding RNA 269                                                  |
| 0,95 | TMEM9     | transmembrane protein 9                                                                     |
| 0,95 | WNT8B     | wingless-type MMTV integration site family, member 8B                                       |
| 0,95 | FOXK2     | forkhead box K2                                                                             |
| 0,95 | KCTD5     | potassium channel tetramerization domain containing 5                                       |
| 0,95 | BAALC     | brain and acute leukemia, cytoplasmic                                                       |
| 0,95 | SOX11     | SRY box 11                                                                                  |
| 0,95 | MPHOSPH10 | M-phase phosphoprotein 10 (U3 small nucleolar ribonucleoprotein)                            |
| 0,95 | KPNA6     | karyopherin alpha 6 (importin alpha 7)                                                      |
| 0,95 | PHF21B    | PHD finger protein 21B                                                                      |
| 0,95 | ESYT1     | extended synaptotagmin-like protein 1                                                       |
| 0,95 | SSX3      | synovial sarcoma, X breakpoint 3                                                            |
| 0,95 | NDC80     | NDC80 kinetochore complex component                                                         |
| 0,95 | GGN       | gametogenetin                                                                               |
| 0,95 | PDLIM7    | PDZ and LIM domain 7 (enigma)                                                               |
| 0,95 | BRCA1     | breast cancer 1, early onset                                                                |
| 0,95 | THAP5     | THAP domain containing 5                                                                    |
| 0,95 | TCEB3C    | transcription elongation factor B polypeptide 3C (elongin A3)                               |
| 0,95 | ZNF20     | zinc finger protein 20                                                                      |

|      |            |                                                                             |
|------|------------|-----------------------------------------------------------------------------|
| 0,95 | MED19      | mediator complex subunit 19                                                 |
| 0,95 | RWDD4      | RWD domain containing 4                                                     |
| 0,95 | B4GALT7    | xylosylprotein beta 1,4-galactosyltransferase, polypeptide 7                |
| 0,95 | OR2M3      | olfactory receptor, family 2, subfamily M, member 3                         |
| 0,95 | SMYD2      | SET and MYND domain containing 2                                            |
| 0,95 | FMO1       | flavin containing monooxygenase 1                                           |
| 0,95 | CSNK1G2    | casein kinase 1, gamma 2                                                    |
| 0,95 | RPS6KA1    | ribosomal protein S6 kinase, 90kDa, polypeptide 1                           |
| 0,95 | RPTN       | repetin                                                                     |
| 0,95 | TRIM49C    | tripartite motif containing 49C                                             |
| 0,95 | OR5V1      | olfactory receptor, family 5, subfamily V, member 1                         |
| 0,95 | CLTA       | clathrin, light chain A                                                     |
| 0,95 | KANK2      | KN motif and ankyrin repeat domains 2                                       |
| 0,95 | KIFC3      | kinesin family member C3                                                    |
| 0,95 | ZWINT      | ZW10 interacting kinetochore protein                                        |
| 0,95 | POLR2K     | polymerase (RNA) II (DNA directed) polypeptide K, 7.0kDa                    |
| 0,95 | RIPK4      | receptor-interacting serine-threonine kinase 4                              |
| 0,95 | FAU        | Finkel-Biskis-Reilly murine sarcoma virus (FBR-MuSV) ubiquitously expressed |
| 0,95 | EDIL3      | EGF-like repeats and discoidin I-like domains 3                             |
| 0,95 | ITM2B      | integral membrane protein 2B                                                |
| 0,95 | CEACAM7    | carcinoembryonic antigen-related cell adhesion molecule 7                   |
| 0,95 | CLDND1     | claudin domain containing 1                                                 |
| 0,95 | PIGB       | phosphatidylinositol glycan anchor biosynthesis class B                     |
| 0,95 | RPL7A      | ribosomal protein L7a                                                       |
| 0,95 | C2orf82    | chromosome 2 open reading frame 82                                          |
| 0,95 | PSD        | pleckstrin and Sec7 domain containing                                       |
| 0,95 | THNSL1     | threonine synthase-like 1                                                   |
| 0,95 | CASP2      | caspase 2                                                                   |
| 0,95 | CENPO      | centromere protein O                                                        |
| 0,95 | LINC00518  | long intergenic non-protein coding RNA 518                                  |
| 0,95 | HS3ST5     | heparan sulfate (glucosamine) 3-O-sulfotransferase 5                        |
| 0,95 | MIEN1      | migration and invasion enhancer 1                                           |
| 0,95 | MRPL14     | mitochondrial ribosomal protein L14                                         |
| 0,95 | ZNF138     | zinc finger protein 138                                                     |
| 0,95 | AP3D1      | adaptor-related protein complex 3, delta 1 subunit                          |
| 0,95 | FOSL1      | FOS-like antigen 1                                                          |
| 0,95 | TMEM174    | transmembrane protein 174                                                   |
| 0,95 | RAP1A      | RAP1A, member of RAS oncogene family                                        |
| 0,95 | TYMP; SCO2 | thymidine phosphorylase; SCO2 cytochrome c oxidase assembly protein         |
| 0,95 | S100A1     | S100 calcium binding protein A1                                             |
| 0,95 | SAG        | S-antigen; retina and pineal gland (arrestin)                               |
| 0,95 | TADA2B     | Transcript Identified by AceView, Entrez Gene ID(s) 93624                   |

|      |                  |                                                                                        |
|------|------------------|----------------------------------------------------------------------------------------|
| 0,95 | PTPRG            | Jeck2013 ALT_ACCEPTOR, ALT_DONOR, coding, INTERNAL, intronic best transcript NM_002841 |
| 0,95 | ADTRP            | androgen-dependent TFPI-regulating protein                                             |
| 0,95 | EGLN3            | egl-9 family hypoxia-inducible factor 3                                                |
| 0,95 | EPAS1            | endothelial PAS domain protein 1                                                       |
| 0,95 | SENP2            | SUMO1/sentrin/SMT3 specific peptidase 2                                                |
| 0,95 | BPIFB1           | BPI fold containing family B, member 1                                                 |
| 0,95 | USP34            | Memczak2013 ANTISENSE, CDS, coding, INTERNAL best transcript NM_014709                 |
| 0,95 | USP31            | ubiquitin specific peptidase 31                                                        |
| 0,95 | PHF8             | PHD finger protein 8                                                                   |
| 0,95 | C1orf122         | chromosome 1 open reading frame 122                                                    |
| 0,95 | EFCAB3           | EF-hand calcium binding domain 3                                                       |
| 0,95 | ARL1             | ADP-ribosylation factor like GTPase 1                                                  |
| 0,95 | ADAMTS1          | ADAM metallopeptidase with thrombospondin type 1 motif 1                               |
| 0,95 | ADAMTS13         | ADAM metallopeptidase with thrombospondin type 1 motif 13                              |
| 0,95 | ZNF879           | zinc finger protein 879                                                                |
| 0,95 | CKLF; CKLF-CMTM1 | chemokine-like factor; CKLF-CMTM1 readthrough                                          |
| 0,95 | NIM1K            | NIM1 serine/threonine protein kinase                                                   |
| 0,95 | HCRTR2           | hypocretin (orexin) receptor 2                                                         |
| 0,95 | ARPC4-TTLL3      | ARPC4-TTLL3 readthrough                                                                |
| 0,95 | LY6K             | lymphocyte antigen 6 complex, locus K                                                  |
| 0,95 | ACTRT1           | actin-related protein T1                                                               |
| 0,95 | CLIC1            | chloride intracellular channel 1                                                       |
| 0,95 | SLC37A3          | solute carrier family 37, member 3                                                     |
| 0,95 | PARG             | poly (ADP-ribose) glycohydrolase                                                       |
| 0,95 | TDGF1            | teratocarcinoma-derived growth factor 1                                                |
| 0,95 | SLITRK4          | SLIT and NTRK-like family, member 4                                                    |
| 0,95 | SRI              | sorcin                                                                                 |
| 0,95 | SPATA5L1         | spermatogenesis associated 5-like 1                                                    |
| 0,95 | C14orf93         | chromosome 14 open reading frame 93                                                    |
| 0,95 | CSRNP1           | cysteine-serine-rich nuclear protein 1                                                 |
| 0,95 | LHX2             | LIM homeobox 2                                                                         |
| 0,95 | KIAA1143         | KIAA1143 [Source:HGNC Symbol;Acc:HGNC:29198]                                           |
| 0,95 | RPL41P5          | ribosomal protein L41 pseudogene 5                                                     |
| 0,95 | MTERF1           | mitochondrial transcription termination factor 1                                       |
| 0,95 | ZFP42            | ZFP42 zinc finger protein                                                              |
| 0,95 | ZC3HAV1          | zinc finger CCCH-type, antiviral 1                                                     |
| 0,95 | GMCL1            | germ cell-less, spermatogenesis associated 1                                           |
| 0,95 | CRP              | C-reactive protein, pentraxin-related                                                  |
| 0,95 | PIR              | pirin                                                                                  |
| 0,95 | COX19            | COX19 cytochrome c oxidase assembly factor                                             |
| 0,95 | CTAGE6           | CTAGE family, member 6                                                                 |
| 0,95 | PFKM             | phosphofructokinase, muscle                                                            |
| 0,95 | ZNF16            | zinc finger protein 16                                                                 |
| 0,95 | SAFB2            | scaffold attachment factor B2                                                          |

|      |                             |                                                                                                                                                                 |
|------|-----------------------------|-----------------------------------------------------------------------------------------------------------------------------------------------------------------|
| 0,95 | ARHGAP32                    | Rho GTPase activating protein 32                                                                                                                                |
| 0,95 | OR4M1                       | olfactory receptor, family 4, subfamily M, member 1                                                                                                             |
| 0,95 | R3HDM4                      | R3H domain containing 4                                                                                                                                         |
| 0,95 | HMCES                       | 5-hydroxymethylcytosine (hmC) binding, ES cell-specific                                                                                                         |
| 0,95 | SURF4                       | surfeit 4                                                                                                                                                       |
| 0,95 | CCL13                       | chemokine (C-C motif) ligand 13                                                                                                                                 |
| 0,95 | BCL2A1                      | BCL2-related protein A1                                                                                                                                         |
| 0,95 | SPATA2                      | spermatogenesis associated 2                                                                                                                                    |
| 0,95 | CCDC114                     | coiled-coil domain containing 114                                                                                                                               |
| 0,95 | FOXRED2                     | FAD-dependent oxidoreductase domain containing 2                                                                                                                |
| 0,95 | CHD2; MIR3175               | chromodomain helicase DNA binding protein 2; microRNA 3175                                                                                                      |
| 0,95 | ADCY6; MIR4701              | adenylate cyclase 6; microRNA 4701                                                                                                                              |
| 0,95 | PHTF2                       | putative homeodomain transcription factor 2                                                                                                                     |
| 0,95 | CKAP5                       | Transcript Identified by AceView, Entrez Gene ID(s) 9793                                                                                                        |
| 0,95 | STOML1                      | stomatin (EPB72)-like 1                                                                                                                                         |
| 0,95 | GBE1                        | glucan (1,4-alpha-), branching enzyme 1                                                                                                                         |
| 0,95 | CCRL2                       | chemokine (C-C motif) receptor-like 2                                                                                                                           |
| 0,95 | LOC100133669; RP11-273G15.2 | Homo sapiens uncharacterized LOC100133669 (LOC100133669), long non-coding RNA.; Transcript Identified by AceView, Entrez Gene ID(s) 100133669; novel transcript |
| 0,95 | AFP                         | alpha-fetoprotein                                                                                                                                               |
| 0,95 | NIPAL1                      | NIPA-like domain containing 1                                                                                                                                   |
| 0,95 | NAGLU                       | N-acetylglucosaminidase, alpha                                                                                                                                  |
| 0,95 | PPP1R3F                     | protein phosphatase 1, regulatory subunit 3F                                                                                                                    |
| 0,95 | MS4A14                      | membrane-spanning 4-domains, subfamily A, member 14                                                                                                             |
| 0,95 | FRG2B                       | FSHD region gene 2 family, member B                                                                                                                             |
| 0,95 | HTR1A                       | 5-hydroxytryptamine (serotonin) receptor 1A, G protein-coupled                                                                                                  |
| 0,95 | ADAMTSL3                    | ADAMTS like 3                                                                                                                                                   |
| 0,95 | SLAMF9                      | SLAM family member 9                                                                                                                                            |
| 0,95 | ZNF250                      | zinc finger protein 250                                                                                                                                         |
| 0,94 | LRRC37A2                    | leucine rich repeat containing 37, member A2                                                                                                                    |
| 0,94 | PLA2G12A                    | phospholipase A2, group XIIA                                                                                                                                    |
| 0,94 | PRRT2                       | proline-rich transmembrane protein 2                                                                                                                            |
| 0,94 | CHL1                        | cell adhesion molecule L1-like                                                                                                                                  |
| 0,94 | FHL1                        | four and a half LIM domains 1                                                                                                                                   |
| 0,94 | COL6A2                      | Jeck2013 ALT_ACCEPTOR, ALT_DONOR, coding, INTERNAL, intronic best transcript NM_058175                                                                          |
| 0,94 | DDX26B                      | DEAD/H (Asp-Glu-Ala-Asp/His) box polypeptide 26B                                                                                                                |
| 0,94 | ARL8A                       | ADP-ribosylation factor like GTPase 8A                                                                                                                          |
| 0,94 | GSG1L                       | GSG1-like                                                                                                                                                       |
| 0,94 | ZBTB7A                      | zinc finger and BTB domain containing 7A                                                                                                                        |
| 0,94 | ZC3H4                       | zinc finger CCCH-type containing 4                                                                                                                              |

|      |                   |                                                                                                                                  |
|------|-------------------|----------------------------------------------------------------------------------------------------------------------------------|
| 0,94 | ATP13A1           | ATPase type 13A1                                                                                                                 |
| 0,94 | CXorf21           | chromosome X open reading frame 21                                                                                               |
| 0,94 | C8orf58           | chromosome 8 open reading frame 58                                                                                               |
| 0,94 | MUC1              | mucin 1, cell surface associated                                                                                                 |
| 0,94 | GLOD4             | glyoxalase domain containing 4                                                                                                   |
| 0,94 | FGF3              | fibroblast growth factor 3                                                                                                       |
| 0,94 | MTRNR2L13         | MT-RNR2-like 13                                                                                                                  |
| 0,94 | VTN               | vitronectin                                                                                                                      |
| 0,94 | LGALS3BP          | lectin, galactoside-binding, soluble, 3 binding protein                                                                          |
| 0,94 | ZFR2              | zinc finger RNA binding protein 2                                                                                                |
| 0,94 | CCDC96            | coiled-coil domain containing 96                                                                                                 |
| 0,94 | FN3KRP            | fructosamine 3 kinase related protein                                                                                            |
| 0,94 | RNPC3             | RNA binding region (RNP1, RRM) containing 3                                                                                      |
| 0,94 | NAB1              | NGFI-A binding protein 1                                                                                                         |
| 0,94 | NUCKS1            | nuclear casein kinase and cyclin-dependent kinase substrate 1                                                                    |
| 0,94 | GSKIP             | GSK3B interacting protein                                                                                                        |
| 0,94 | TSPAN9            | tetraspanin 9                                                                                                                    |
| 0,94 | SLC27A4           | solute carrier family 27 (fatty acid transporter), member 4                                                                      |
| 0,94 | H2AFY             | H2A histone family, member Y                                                                                                     |
| 0,94 | HIPK2             | homeodomain interacting protein kinase 2                                                                                         |
| 0,94 | MIS12             | MIS12 kinetochore complex component                                                                                              |
| 0,94 | CARD8             | caspase recruitment domain family, member 8                                                                                      |
| 0,94 | DGKZ              | diacylglycerol kinase, zeta                                                                                                      |
| 0,94 | CREB3L1           | cAMP responsive element binding protein 3-like 1                                                                                 |
| 0,94 | HM13; MCTS2P      | histocompatibility (minor) 13; malignant T-cell amplified sequence 2, pseudogene                                                 |
| 0,94 | NPIP3             | nuclear pore complex interacting protein family, member B3                                                                       |
| 0,94 | NR6A1             | nuclear receptor subfamily 6, group A, member 1                                                                                  |
| 0,94 | PEX6              | peroxisomal biogenesis factor 6                                                                                                  |
| 0,94 | MYBPHL            | myosin binding protein H-like                                                                                                    |
| 0,94 | PIH1D1            | PIH1 domain containing 1                                                                                                         |
| 0,94 | BSX               | brain-specific homeobox                                                                                                          |
| 0,94 | RPL41             | Synthetic construct Homo sapiens clone IMAGE:100063377, MGC:190767 ribosomal protein L41 (RPL41) mRNA, encodes complete protein. |
| 0,94 | ESD               | esterase D                                                                                                                       |
| 0,94 | CCNDBP1           | cyclin D-type binding-protein 1                                                                                                  |
| 0,94 | BTBD9             | Memczak2013 ALT_ACCEPTOR, ALT_DONOR, coding, INTERNAL, intronic best transcript NM_001099272                                     |
| 0,94 | FREM2             | FRAS1 related extracellular matrix protein 2                                                                                     |
| 0,94 | COMMD6            | COMM domain containing 6                                                                                                         |
| 0,94 | USP17L15          | ubiquitin specific peptidase 17-like family member 15                                                                            |
| 0,94 | PHACTR2           | phosphatase and actin regulator 2                                                                                                |
| 0,94 | H3F3A;<br>H3F3AP4 | H3 histone, family 3A; H3 histone, family 3A, pseudogene 4                                                                       |

|      |                                    |                                                                                                                                                                           |
|------|------------------------------------|---------------------------------------------------------------------------------------------------------------------------------------------------------------------------|
| 0,94 | BCL10                              | B-cell CLL/lymphoma 10                                                                                                                                                    |
| 0,94 | NUDT14                             | nudix hydrolase 14                                                                                                                                                        |
| 0,94 | USP17L11;<br>USP17L18;<br>USP17L20 | ubiquitin specific peptidase 17-like family member 11;<br>ubiquitin specific peptidase 17-like family member 18;<br>ubiquitin specific peptidase 17-like family member 20 |
| 0,94 | TMEM201                            | transmembrane protein 201                                                                                                                                                 |
| 0,94 | ESRP1                              | epithelial splicing regulatory protein 1                                                                                                                                  |
| 0,94 | NKPD1                              | NTPase, KAP family P-loop domain containing 1                                                                                                                             |
| 0,94 | KIF2C                              | kinesin family member 2C                                                                                                                                                  |
| 0,94 | RPL35A                             | ribosomal protein L35a                                                                                                                                                    |
| 0,94 | PGLYRP2                            | peptidoglycan recognition protein 2                                                                                                                                       |
| 0,94 | C9orf69                            | chromosome 9 open reading frame 69                                                                                                                                        |
| 0,94 | KCTD15                             | potassium channel tetramerization domain containing 15                                                                                                                    |
| 0,94 | SNX14                              | sorting nexin 14                                                                                                                                                          |
| 0,94 | ERN2                               | endoplasmic reticulum to nucleus signaling 2                                                                                                                              |
| 0,94 | SLC37A2                            | solute carrier family 37 (glucose-6-phosphate transporter), member 2                                                                                                      |
| 0,94 | GTSE1                              | G-2 and S-phase expressed 1                                                                                                                                               |
| 0,94 | ANKRD44                            | Memczak2013 ANTISENSE, coding, INTERNAL, intronic best transcript NM_001195144                                                                                            |
| 0,94 | ZBTB4                              | zinc finger and BTB domain containing 4                                                                                                                                   |
| 0,94 | ATG4A                              | autophagy related 4A, cysteine peptidase                                                                                                                                  |
| 0,94 | CHRM4                              | cholinergic receptor, muscarinic 4                                                                                                                                        |
| 0,94 | IPO5                               | importin 5                                                                                                                                                                |
| 0,94 | CSNK1A1                            | casein kinase 1, alpha 1                                                                                                                                                  |
| 0,94 | SAAL1                              | serum amyloid A-like 1                                                                                                                                                    |
| 0,94 | GJB6                               | gap junction protein beta 6                                                                                                                                               |
| 0,94 | ATP6AP1L                           | ATPase, H <sup>+</sup> transporting, lysosomal accessory protein 1-like                                                                                                   |
| 0,94 | TMCO1                              | transmembrane and coiled-coil domains 1                                                                                                                                   |
| 0,94 | RAE1                               | ribonucleic acid export 1                                                                                                                                                 |
| 0,94 | ZNF311                             | zinc finger protein 311                                                                                                                                                   |
| 0,94 | OR5AS1                             | olfactory receptor, family 5, subfamily AS, member 1                                                                                                                      |
| 0,94 | AGT                                | angiotensinogen (serpin peptidase inhibitor, clade A, member 8)                                                                                                           |
| 0,94 | B4GALT2                            | UDP-Gal:betaGlcNAc beta 1,4- galactosyltransferase, polypeptide 2                                                                                                         |
| 0,94 | CRTAM                              | cytotoxic and regulatory T-cell molecule                                                                                                                                  |
| 0,94 | PRORY                              | proline rich, Y-linked                                                                                                                                                    |
| 0,94 | F13A1                              | coagulation factor XIII, A1 polypeptide                                                                                                                                   |
| 0,94 | CWF19L2                            | CWF19-like 2, cell cycle control (S. pombe)                                                                                                                               |
| 0,94 | SORBS3                             | sorbin and SH3 domain containing 3                                                                                                                                        |
| 0,94 | PPP1R14D                           | protein phosphatase 1, regulatory (inhibitor) subunit 14D                                                                                                                 |
| 0,94 | PLEKHA7                            | pleckstrin homology domain containing, family A member 7                                                                                                                  |
| 0,94 | CASP8                              | caspase 8, apoptosis-related cysteine peptidase                                                                                                                           |

|      |                      |                                                                              |
|------|----------------------|------------------------------------------------------------------------------|
| 0,94 | DHRS3;<br>MIR6730    | dehydrogenase/reductase (SDR family) member 3;<br>microRNA 6730              |
| 0,94 | AHSP                 | alpha hemoglobin stabilizing protein                                         |
| 0,94 | GREM1                | gremlin 1, DAN family BMP antagonist<br>[Source:HGNC Symbol;Acc:HGNC:2001]   |
| 0,94 | ZDHHC16              | zinc finger, DHHC-type containing 16                                         |
| 0,94 | METTL25              | methyltransferase like 25                                                    |
| 0,94 | RBM3                 | RNA binding motif (RNP1, RRM) protein 3                                      |
| 0,94 | ZBED9                | zinc finger, BED-type containing 9                                           |
| 0,94 | TGFB2; TGFB2-<br>OT1 | transforming growth factor beta 2; TGFB2 overlapping<br>transcript 1         |
| 0,94 | KMT5A                | lysine (K)-specific methyltransferase 5A                                     |
| 0,94 | ATP2A2               | ATPase, Ca++ transporting, cardiac muscle, slow<br>twitch 2                  |
| 0,94 | NAGA                 | N-acetylgalactosaminidase, alpha-                                            |
| 0,94 | NUP85                | nucleoporin 85kDa                                                            |
| 0,94 | RUVBL1               | RuvB-like AAA ATPase 1                                                       |
| 0,94 | LZTS1                | leucine zipper, putative tumor suppressor 1                                  |
| 0,94 | FEM1A                | fem-1 homolog a (C. elegans)                                                 |
| 0,94 | CTH                  | cystathionine gamma-lyase                                                    |
| 0,94 | EIF2S2               | eukaryotic translation initiation factor 2, subunit 2 beta,<br>38kDa         |
| 0,94 | MIB2                 | mindbomb E3 ubiquitin protein ligase 2                                       |
| 0,94 | MIF                  | macrophage migration inhibitory factor (glycosylation-<br>inhibiting factor) |
| 0,94 | HOXC12               | homeobox C12                                                                 |
| 0,94 | FLG2                 | filaggrin family member 2                                                    |
| 0,94 | PPIE                 | peptidylprolyl isomerase E (cyclophilin E)                                   |
| 0,94 | DPEP3                | dipeptidase 3                                                                |
| 0,94 | SWAP70               | SWAP switching B-cell complex 70kDa subunit                                  |
| 0,94 | NCBP1                | nuclear cap binding protein subunit 1                                        |
| 0,94 | TRIM67               | tripartite motif containing 67                                               |
| 0,94 | GATSL3               | GATS protein-like 3                                                          |
| 0,94 | KNG1                 | kininogen 1                                                                  |
| 0,94 | SERPINA10            | serpin peptidase inhibitor, clade A (alpha-1<br>antitrypsin), member 10      |
| 0,94 | KRR1                 | KRR1, small subunit (SSU) processome component,<br>homolog (yeast)           |
| 0,94 | RBM27                | RNA binding motif protein 27                                                 |
| 0,94 | PCOLCE-AS1           | PCOLCE antisense RNA 1                                                       |
| 0,94 | NPIP8                | nuclear pore complex interacting protein family,<br>member B8                |
| 0,94 | ATP6V0B              | ATPase, H+ transporting, lysosomal 21kDa, V0<br>subunit b                    |
| 0,94 | SBNO1;<br>MIR8072    | strawberry notch homolog 1 (Drosophila); microRNA<br>8072                    |
| 0,94 | C19orf38             | chromosome 19 open reading frame 38                                          |
| 0,94 | SLC15A4              | solute carrier family 15 (oligopeptide transporter),<br>member 4             |
| 0,94 | REXO1L2P             | REX1, RNA exonuclease 1 homolog-like 2,<br>pseudogene                        |

|      |                |                                                                                         |
|------|----------------|-----------------------------------------------------------------------------------------|
| 0,94 | REXO1L4P       | REX1, RNA exonuclease 1 homolog-like 4, pseudogene                                      |
| 0,94 | MPHOSPH9       | M-phase phosphoprotein 9                                                                |
| 0,94 | KIF12          | kinesin family member 12                                                                |
| 0,94 | HIST1H2BO      | histone cluster 1, H2bo                                                                 |
| 0,94 | TERT           | Zhang2013 ALT_ACCEPTOR, ALT_DONOR, coding, INTERNAL, intronic best transcript NM_198253 |
| 0,94 | NELFE; MIR1236 | negative elongation factor complex member E; microRNA 1236                              |
| 0,94 | MORC2          | MORC family CW-type zinc finger 2                                                       |
| 0,94 | HHLA2          | HERV-H LTR-associating 2                                                                |
| 0,94 | KLRF2          | killer cell lectin-like receptor subfamily F, member 2                                  |
| 0,94 | HLA-G          | major histocompatibility complex, class I, G                                            |
| 0,94 | IL4            | interleukin 4                                                                           |
| 0,94 | SLC25A37       | solute carrier family 25 (mitochondrial iron transporter), member 37                    |
| 0,94 | ZEB1           | zinc finger E-box binding homeobox 1                                                    |
| 0,94 | PPP4R1         | protein phosphatase 4, regulatory subunit 1                                             |
| 0,94 | MLST8          | MTOR associated protein, LST8 homolog                                                   |
| 0,94 | SLC25A40       | solute carrier family 25, member 40                                                     |
| 0,94 | HIST1H2BB      | histone cluster 1, H2bb                                                                 |
| 0,94 | ACE2           | angiotensin I converting enzyme 2                                                       |
| 0,94 | C11orf42       | chromosome 11 open reading frame 42                                                     |
| 0,94 | AADACL4        | arylacetamide deacetylase-like 4                                                        |
| 0,94 | MIER3          | mesoderm induction early response 1, family member 3                                    |
| 0,94 | PARK7          | parkinson protein 7                                                                     |
| 0,94 | CLCF1          | cardiotrophin-like cytokine factor 1                                                    |
| 0,94 | UVRAG          | UV radiation resistance associated                                                      |
| 0,94 | ZBTB37         | zinc finger and BTB domain containing 37                                                |
| 0,94 | E2F2           | E2F transcription factor 2                                                              |
| 0,94 | TOR2A          | torsin family 2, member A                                                               |
| 0,94 | SLC4A2         | solute carrier family 4 (anion exchanger), member 2                                     |
| 0,94 | KLHL15         | kelch-like family member 15                                                             |
| 0,94 | AMPD1          | adenosine monophosphate deaminase 1                                                     |
| 0,94 | MTX2           | metaxin 2                                                                               |
| 0,94 | OXCT1          | 3-oxoacid CoA-transferase 1                                                             |
| 0,94 | EPHX1          | epoxide hydrolase 1, microsomal (xenobiotic)                                            |
| 0,94 | VASN           | vasorin                                                                                 |
| 0,94 | DET1           | de-etiolated homolog 1 (Arabidopsis)                                                    |
| 0,94 | GSTA5          | glutathione S-transferase alpha 5                                                       |
| 0,94 | PIH1D2         | PIH1 domain containing 2                                                                |
| 0,94 | SLC25A26       | solute carrier family 25 (S-adenosylmethionine carrier), member 26                      |
| 0,94 | HLA-DRB5       | major histocompatibility complex, class II, DR beta 5                                   |
| 0,94 | RPS21          | ribosomal protein S21                                                                   |
| 0,94 | SKP2           | Transcript Identified by AceView, Entrez Gene ID(s) 6502                                |
| 0,94 | CATSPERB       | catsper channel auxiliary subunit beta                                                  |

|      |                               |                                                                                                                                           |
|------|-------------------------------|-------------------------------------------------------------------------------------------------------------------------------------------|
| 0,94 | FBXL5                         | F-box and leucine-rich repeat protein 5                                                                                                   |
| 0,94 | CT47A9;<br>CT47A4;<br>CT47A11 | cancer/testis antigen family 47, member A9;<br>cancer/testis antigen family 47, member A4;<br>cancer/testis antigen family 47, member A11 |
| 0,94 | CT47A3;<br>CT47A10            | cancer/testis antigen family 47, member A3;<br>cancer/testis antigen family 47, member A10                                                |
| 0,94 | CT47A10;<br>CT47A8;<br>CT47A9 | cancer/testis antigen family 47, member A10;<br>cancer/testis antigen family 47, member A8;<br>cancer/testis antigen family 47, member A9 |
| 0,94 | CT47A6;<br>CT47A4             | cancer/testis antigen family 47, member A6;<br>cancer/testis antigen family 47, member A4                                                 |
| 0,94 | CT47A3                        | cancer/testis antigen family 47, member A3                                                                                                |
| 0,94 | CT47A2                        | cancer/testis antigen family 47, member A2                                                                                                |
| 0,94 | CT47A12;<br>CT47A8            | cancer/testis antigen family 47, member A12;<br>cancer/testis antigen family 47, member A8                                                |
| 0,94 | OR5A1                         | olfactory receptor, family 5, subfamily A, member 1                                                                                       |
| 0,94 | HCFC1                         | host cell factor C1                                                                                                                       |
| 0,94 | GDF3                          | growth differentiation factor 3                                                                                                           |
| 0,94 | OR2A5                         | olfactory receptor, family 2, subfamily A, member 5                                                                                       |
| 0,94 | ALOX15                        | arachidonate 15-lipoxygenase                                                                                                              |
| 0,94 | GLYCK                         | glycerate kinase                                                                                                                          |
| 0,94 | C19orf67                      | chromosome 19 open reading frame 67                                                                                                       |
| 0,94 | FPR3                          | formyl peptide receptor 3                                                                                                                 |
| 0,94 | PSMD13                        | proteasome 26S subunit, non-ATPase 13                                                                                                     |
| 0,94 | RAB3D                         | RAB3D, member RAS oncogene family                                                                                                         |
| 0,94 | CACNG2                        | calcium channel, voltage-dependent, gamma subunit 2                                                                                       |
| 0,94 | TXNDC12;<br>KTI12             | thioredoxin domain containing 12 (endoplasmic reticulum); KTI12 chromatin associated homolog                                              |
| 0,94 | AURKC                         | aurora kinase C                                                                                                                           |
| 0,94 | VEZF1                         | vascular endothelial zinc finger 1                                                                                                        |
| 0,94 | FAM53B                        | family with sequence similarity 53, member B                                                                                              |
| 0,94 | ALPK3                         | alpha kinase 3                                                                                                                            |
| 0,94 | MTMR6                         | myotubularin related protein 6                                                                                                            |
| 0,94 | ZC3H3                         | Transcript Identified by AceView, Entrez Gene ID(s)<br>23144                                                                              |
| 0,94 | ULK3                          | unc-51 like kinase 3                                                                                                                      |
| 0,94 | SIAH3                         | siah E3 ubiquitin protein ligase family member 3                                                                                          |
| 0,94 | LINC00504                     | long intergenic non-protein coding RNA 504                                                                                                |
| 0,94 | ZNF304                        | zinc finger protein 304                                                                                                                   |
| 0,94 | LYSMD4                        | LysM, putative peptidoglycan-binding, domain<br>containing 4                                                                              |
| 0,94 | WARS                          | tryptophanyl-tRNA synthetase                                                                                                              |
| 0,94 | SLC5A1                        | solute carrier family 5 (sodium/glucose cotransporter),<br>member 1                                                                       |
| 0,94 | HNF4G                         | hepatocyte nuclear factor 4, gamma                                                                                                        |
| 0,94 | EXO5                          | exonuclease 5                                                                                                                             |
| 0,94 | MAP6D1                        | MAP6 domain containing 1                                                                                                                  |
| 0,94 | CRISP2                        | cysteine-rich secretory protein 2                                                                                                         |
| 0,94 | EIF2B4                        | eukaryotic translation initiation factor 2B, subunit 4<br>delta, 67kDa                                                                    |

|      |                                |                                                                                        |
|------|--------------------------------|----------------------------------------------------------------------------------------|
| 0,94 | ARHGAP21                       | Rho GTPase activating protein 21                                                       |
| 0,94 | GOLGA8F;<br>GOLGA8G            | golgin A8 family, member F; golgin A8 family,<br>member G                              |
| 0,94 | PF4                            | platelet factor 4                                                                      |
| 0,94 | ZNF799                         | zinc finger protein 799                                                                |
| 0,94 | HTR1E                          | 5-hydroxytryptamine (serotonin) receptor 1E, G protein-<br>coupled                     |
| 0,94 | C7orf61                        | chromosome 7 open reading frame 61                                                     |
| 0,94 | ZNF502                         | zinc finger protein 502                                                                |
| 0,94 | FAM13A                         | family with sequence similarity 13, member A                                           |
| 0,94 | ANAPC10                        | anaphase promoting complex subunit 10                                                  |
| 0,94 | LINC01547                      | long intergenic non-protein coding RNA 1547                                            |
| 0,94 | ZFP91-CNTF                     | ZFP91-CNTF readthrough (NMD candidate)                                                 |
| 0,94 | WDR6                           | Memczak2013 ANTISENSE, CDS, coding,<br>INTERNAL best transcript NM_018031              |
| 0,94 | POLE4                          | polymerase (DNA-directed), epsilon 4, accessory<br>subunit                             |
| 0,94 | TSTD2                          | thiosulfate sulfurtransferase (rhodanese)-like domain<br>containing 2                  |
| 0,94 | RHOQ                           | ras homolog family member Q                                                            |
| 0,94 | IFNE; MIR31HG                  | interferon, epsilon; MIR31 host gene                                                   |
| 0,94 | XXbac-<br>BPG154L12.4;<br>RNF5 | putative novel transcript; Transcript Identified by<br>AceView, Entrez Gene ID(s) 6048 |
| 0,94 | OR52B4                         | olfactory receptor, family 52, subfamily B, member 4<br>(gene/pseudogene)              |
| 0,94 | DHRS7C                         | dehydrogenase/reductase (SDR family) member 7C                                         |
| 0,94 | DICER1                         | dicer 1, ribonuclease type III                                                         |
| 0,94 | DEFB132                        | defensin, beta 132                                                                     |
| 0,94 | ZNF362                         | zinc finger protein 362                                                                |
| 0,94 | ABLIM2                         | actin binding LIM protein family, member 2                                             |
| 0,94 | RPL30                          | ribosomal protein L30                                                                  |
| 0,94 | DGKD                           | diacylglycerol kinase, delta 130kDa                                                    |
| 0,94 | FZD6                           | frizzled class receptor 6                                                              |
| 0,94 | MIPEP                          | mitochondrial intermediate peptidase                                                   |
| 0,94 | NR4A1                          | nuclear receptor subfamily 4, group A, member 1                                        |
| 0,94 | ARFIP2                         | ADP-ribosylation factor interacting protein 2                                          |
| 0,94 | C6orf229                       | chromosome 6 open reading frame 229                                                    |
| 0,94 | FSTL1; MIR198                  | folliculin like 1; microRNA 198                                                        |
| 0,94 | RBPM52                         | RNA binding protein with multiple splicing 2                                           |
| 0,94 | RETSAT                         | retinol saturase (all-trans-retinol 13,14-reductase)                                   |
| 0,94 | ARPC4                          | actin related protein 2/3 complex subunit 4                                            |
| 0,94 | CBS                            | cystathionine-beta-synthase                                                            |
| 0,94 | RP3-370M22.8;<br>GRAP2         | Transcript Identified by AceView, Entrez Gene ID(s)<br>9402; putative novel transcript |
| 0,94 | FAM83F                         | family with sequence similarity 83, member F                                           |
| 0,94 | HES7                           | hes family bHLH transcription factor 7                                                 |
| 0,94 | MTMR12                         | myotubularin related protein 12                                                        |
| 0,94 | FAM187B                        | family with sequence similarity 187, member B                                          |
| 0,94 | KRTAP12-2                      | keratin associated protein 12-2                                                        |

|      |                        |                                                                                                                     |
|------|------------------------|---------------------------------------------------------------------------------------------------------------------|
| 0,94 | CD300C                 | CD300c molecule                                                                                                     |
| 0,94 | PDE4D                  | phosphodiesterase 4D, cAMP-specific                                                                                 |
| 0,94 | GPT                    | glutamic-pyruvate transaminase (alanine aminotransferase)                                                           |
| 0,94 | PCM1                   | pericentriolar material 1                                                                                           |
| 0,94 | MSX1                   | msh homeobox 1                                                                                                      |
| 0,94 | LINC00934              | long intergenic non-protein coding RNA 934                                                                          |
| 0,94 | XRCC5                  | Transcript Identified by AceView, Entrez Gene ID(s) 7520                                                            |
| 0,94 | ASTN1                  | astrotactin 1                                                                                                       |
| 0,94 | CSNK1G2-AS1            | CSNK1G2 antisense RNA 1                                                                                             |
| 0,94 | NAPA                   | N-ethylmaleimide-sensitive factor attachment protein, alpha                                                         |
| 0,94 | CA13                   | carbonic anhydrase XIII                                                                                             |
| 0,94 | LSP1P3                 | lymphocyte-specific protein 1 pseudogene 3                                                                          |
| 0,94 | BRD4                   | bromodomain containing 4                                                                                            |
| 0,94 | IHH                    | indian hedgehog                                                                                                     |
| 0,94 | CEP89                  | centrosomal protein 89kDa                                                                                           |
| 0,94 | TMEM114                | transmembrane protein 114                                                                                           |
| 0,94 | SMARCA1                | SWI/SNF related, matrix associated, actin dependent regulator of chromatin, subfamily a, member 1                   |
| 0,94 | CHMP1B                 | charged multivesicular body protein 1B                                                                              |
| 0,94 | SACS                   | sacsin molecular chaperone                                                                                          |
| 0,94 | SSX9                   | synovial sarcoma, X breakpoint 9                                                                                    |
| 0,94 | TRAF4                  | TNF receptor-associated factor 4                                                                                    |
| 0,94 | MCM10                  | minichromosome maintenance 10 replication initiation factor                                                         |
| 0,94 | MED27                  | mediator complex subunit 27                                                                                         |
| 0,94 | PRR12                  | proline rich 12                                                                                                     |
| 0,94 | STAT6                  | signal transducer and activator of transcription 6, interleukin-4 induced                                           |
| 0,94 | CNOT6L                 | CCR4-NOT transcription complex subunit 6-like                                                                       |
| 0,94 | KRTAP19-2              | keratin associated protein 19-2                                                                                     |
| 0,94 | IRF2BPL                | interferon regulatory factor 2 binding protein-like                                                                 |
| 0,94 | LRMP                   | lymphoid-restricted membrane protein                                                                                |
| 0,94 | AUP1                   | ancient ubiquitous protein 1                                                                                        |
| 0,94 | FMN1                   | formin 1                                                                                                            |
| 0,94 | ORMDL2                 | ORMDL sphingolipid biosynthesis regulator 2                                                                         |
| 0,94 | GLRX5                  | glutaredoxin 5                                                                                                      |
| 0,94 | TNFAIP8L1              | tumor necrosis factor, alpha-induced protein 8-like 1                                                               |
| 0,94 | FLJ30679; RP11-463O9.8 | uncharacterized protein FLJ30679; uncharacterized protein FLJ30679 [Source:EntrezGene;Acc:146512]; novel transcript |
| 0,94 | TCFL5                  | transcription factor-like 5 (basic helix-loop-helix)                                                                |
| 0,94 | ATG14                  | autophagy related 14                                                                                                |
| 0,94 | DUSP16                 | dual specificity phosphatase 16                                                                                     |
| 0,94 | CALB1                  | calbindin 1                                                                                                         |
| 0,94 | MKRN2OS                | MKRN2 opposite strand                                                                                               |
| 0,94 | MAML1                  | mastermind-like transcriptional coactivator 1                                                                       |
| 0,94 | PRDM9                  | PR domain containing 9                                                                                              |

|      |                            |                                                                                                         |
|------|----------------------------|---------------------------------------------------------------------------------------------------------|
| 0,94 | KRT81                      | keratin 81, type II                                                                                     |
| 0,94 | ATP4B                      | ATPase, H+/K+ exchanging, beta polypeptide                                                              |
| 0,94 | GAPDHS                     | glyceraldehyde-3-phosphate dehydrogenase, spermatogenic                                                 |
| 0,94 | CAMP                       | cathelicidin antimicrobial peptide                                                                      |
| 0,94 | ODF3                       | outer dense fiber of sperm tails 3                                                                      |
| 0,94 | TMLHE                      | trimethyllysine hydroxylase, epsilon                                                                    |
| 0,94 | CCL24                      | chemokine (C-C motif) ligand 24                                                                         |
| 0,94 | LRRCC1                     | leucine rich repeat and coiled-coil centrosomal protein 1                                               |
| 0,94 | AMMECR1                    | Alport syndrome, mental retardation, midface hypoplasia and elliptocytosis chromosomal region gene 1    |
| 0,94 | OR10A6                     | olfactory receptor, family 10, subfamily A, member 6 (gene/pseudogene)                                  |
| 0,94 | OR10A6                     | olfactory receptor family 10 subfamily A member 6 (gene/pseudogene) [Source:HGNC Symbol;Acc:HGNC:15132] |
| 0,94 | MKL2; TVP23CP2             | MKL/myocardin-like 2; TVP23C pseudogene 2                                                               |
| 0,94 | PRC1                       | protein regulator of cytokinesis 1                                                                      |
| 0,94 | HDAC7                      | histone deacetylase 7                                                                                   |
| 0,94 | HARS                       | histidyl-tRNA synthetase                                                                                |
| 0,94 | RD3L                       | retinal degeneration 3-like                                                                             |
| 0,94 | NOL4                       | nucleolar protein 4                                                                                     |
| 0,94 | TIFAB                      | TRAF-interacting protein with forkhead-associated domain, family member B                               |
| 0,94 | DNAJC9                     | DnaJ (Hsp40) homolog, subfamily C, member 9                                                             |
| 0,94 | SDR39U1                    | short chain dehydrogenase/reductase family 39U, member 1                                                |
| 0,94 | KCNK18                     | potassium channel, two pore domain subfamily K, member 18                                               |
| 0,94 | TIMM10                     | translocase of inner mitochondrial membrane 10 homolog (yeast)                                          |
| 0,94 | DOCK1                      | dedicator of cytokinesis 1                                                                              |
| 0,94 | TRIM27                     | Transcript Identified by AceView, Entrez Gene ID(s) 5987                                                |
| 0,94 | PACRGL                     | PARK2 co-regulated like                                                                                 |
| 0,94 | TOP2A                      | topoisomerase (DNA) II alpha                                                                            |
| 0,94 | LILRB1                     | leukocyte immunoglobulin-like receptor, subfamily B (with TM and ITIM domains), member 1                |
| 0,94 | SCPEP1                     | serine carboxypeptidase 1                                                                               |
| 0,94 | HOXC11                     | homeobox C11                                                                                            |
| 0,94 | TNFRSF1B; MIR4632; MIR7846 | tumor necrosis factor receptor superfamily, member 1B; microRNA 4632; microRNA 7846                     |
| 0,94 | SPATA13; C1QTNF9           | spermatogenesis associated 13; C1q and tumor necrosis factor related protein 9                          |
| 0,94 | RNF185                     | Transcript Identified by AceView, Entrez Gene ID(s) 91445                                               |
| 0,94 | UBE3B                      | ubiquitin protein ligase E3B                                                                            |

|      |            |                                                                                                                                             |
|------|------------|---------------------------------------------------------------------------------------------------------------------------------------------|
| 0,94 | HTR6       | 5-hydroxytryptamine (serotonin) receptor 6, G protein-coupled                                                                               |
| 0,94 | MTUS1      | microtubule associated tumor suppressor 1                                                                                                   |
| 0,94 | CD63       | CD63 molecule                                                                                                                               |
| 0,94 | SEMA5B     | sema domain, seven thrombospondin repeats (type 1 and type 1-like), transmembrane domain (TM) and short cytoplasmic domain, (semaphorin) 5B |
| 0,94 | ASB17      | ankyrin repeat and SOCS box containing 17                                                                                                   |
| 0,94 | PHKB       | phosphorylase kinase, beta                                                                                                                  |
| 0,94 | ST6GALNAC5 | ST6 (alpha-N-acetyl-neuraminy-2,3-beta-galactosyl-1,3)-N-acetylgalactosaminide alpha-2,6-sialyltransferase 5                                |
| 0,94 | NMRAL1     | NmrA-like family domain containing 1                                                                                                        |
| 0,94 | SPAM1      | sperm adhesion molecule 1 (PH-20 hyaluronidase, zona pellucida binding)                                                                     |
| 0,94 | LRIT3      | leucine-rich repeat, immunoglobulin-like and transmembrane domains 3                                                                        |
| 0,94 | PTGDS      | prostaglandin D2 synthase 21kDa (brain)                                                                                                     |
| 0,94 | AANAT      | aralkylamine N-acetyltransferase                                                                                                            |
| 0,94 | RXFP3      | relaxin/insulin-like family peptide receptor 3                                                                                              |
| 0,94 | RFXAP      | regulatory factor X-associated protein                                                                                                      |
| 0,94 | RPS6KA1    | ribosomal protein S6 kinase, 90kDa, polypeptide 1                                                                                           |
| 0,94 | ELN        | elastin                                                                                                                                     |
| 0,94 | OR5C1      | olfactory receptor, family 5, subfamily C, member 1                                                                                         |
| 0,94 | RPP25L     | ribonuclease P/MRP 25kDa subunit-like                                                                                                       |
| 0,94 | SAT2       | spermidine/spermine N1-acetyltransferase family member 2                                                                                    |
| 0,94 | ZNF432     | zinc finger protein 432                                                                                                                     |
| 0,94 | IFIT1B     | interferon-induced protein with tetratricopeptide repeats 1B                                                                                |
| 0,94 | GTF3C3     | general transcription factor IIIC subunit 3                                                                                                 |
| 0,94 | INPP5F     | inositol polyphosphate-5-phosphatase F                                                                                                      |
| 0,94 | LINC01219  | long intergenic non-protein coding RNA 1219                                                                                                 |
| 0,94 | ZNF354A    | zinc finger protein 354A                                                                                                                    |
| 0,94 | FBXL13     | F-box and leucine-rich repeat protein 13                                                                                                    |
| 0,94 | CAMLG      | calcium modulating ligand                                                                                                                   |
| 0,94 | KCNS3      | potassium voltage-gated channel, modifier subfamily S, member 3                                                                             |
| 0,94 | NEMP1      | nuclear envelope integral membrane protein 1                                                                                                |
| 0,94 | MRPL24     | mitochondrial ribosomal protein L24                                                                                                         |
| 0,94 | LINC01387  | long intergenic non-protein coding RNA 1387                                                                                                 |
| 0,94 | IAH1       | isoamyl acetate-hydrolyzing esterase 1 homolog                                                                                              |
| 0,94 | ALDH2      | aldehyde dehydrogenase 2 family (mitochondrial)                                                                                             |
| 0,94 | MYL9       | myosin light chain 9                                                                                                                        |
| 0,94 | OTUD5      | OTU deubiquitinase 5                                                                                                                        |
| 0,94 | ASCL1      | achaete-scute family bHLH transcription factor 1                                                                                            |
| 0,94 | ZNF660     | zinc finger protein 660                                                                                                                     |
| 0,94 | IMPACT     | impact RWD domain protein                                                                                                                   |
| 0,94 | USP36      | ubiquitin specific peptidase 36                                                                                                             |

|      |                    |                                                                                        |
|------|--------------------|----------------------------------------------------------------------------------------|
| 0,94 | CHST15             | carbohydrate (N-acetylgalactosamine 4-sulfate 6-O) sulfotransferase 15                 |
| 0,94 | CYB5D2             | cytochrome b5 domain containing 2                                                      |
| 0,94 | IL21               | interleukin 21                                                                         |
| 0,94 | GORAB              | golgin, RAB6-interacting                                                               |
| 0,94 | ADAMTS2            | ADAM metalloproteinase with thrombospondin type 1 motif 2                              |
| 0,94 | TARBP1             | TAR (HIV-1) RNA binding protein 1                                                      |
| 0,94 | IFITM1             | interferon induced transmembrane protein 1                                             |
| 0,94 | OR8K1              | olfactory receptor, family 8, subfamily K, member 1                                    |
| 0,94 | TTF1               | transcription termination factor, RNA polymerase I                                     |
| 0,94 | ANKRD10            | ankyrin repeat domain 10                                                               |
| 0,94 | ADGRF5             | adhesion G protein-coupled receptor F5                                                 |
| 0,94 | CCDC171            | coiled-coil domain containing 171                                                      |
| 0,94 | ZNF32              | zinc finger protein 32                                                                 |
| 0,94 | KIF3A              | kinesin family member 3A                                                               |
| 0,94 | LRRC37A11P         | leucine rich repeat containing 37, member A11, pseudogene                              |
| 0,94 | CENPU              | centromere protein U                                                                   |
| 0,94 | G6PC3              | glucose 6 phosphatase, catalytic, 3                                                    |
| 0,94 | PCYT1A             | phosphate cytidyltransferase 1, choline, alpha                                         |
| 0,94 | ABHD14A            | abhydrolase domain containing 14A                                                      |
| 0,94 | GTF2A1             | general transcription factor IIA 1                                                     |
| 0,94 | RAB1A              | RAB1A, member RAS oncogene family                                                      |
| 0,94 | SLC11A1            | solute carrier family 11 (proton-coupled divalent metal ion transporter), member 1     |
| 0,94 | ABLIM3             | actin binding LIM protein family, member 3                                             |
| 0,94 | FBXO45             | F-box protein 45                                                                       |
| 0,94 | ZRSR2              | zinc finger (CCCH type), RNA binding motif and serine/arginine rich 2                  |
| 0,94 | ZNF716             | zinc finger protein 716                                                                |
| 0,94 | HIST1H4L           | histone cluster 1, H4l                                                                 |
| 0,94 | HMG20B             | high mobility group 20B                                                                |
| 0,94 | ZSCAN30            | zinc finger and SCAN domain containing 30                                              |
| 0,94 | CHRAC1             | Transcript Identified by AceView, Entrez Gene ID(s) 54108                              |
| 0,94 | MGAT4A             | mannosyl (alpha-1,3-)-glycoprotein beta-1,4-N-acetylglucosaminyltransferase, isozyme A |
| 0,94 | ZNF286B;<br>FOXO3B | zinc finger protein 286B; forkhead box O3B pseudogene                                  |
| 0,94 | CAPS               | calcyphosine                                                                           |
| 0,94 | HNF4A              | hepatocyte nuclear factor 4, alpha                                                     |
| 0,94 | COL4A2             | collagen, type IV, alpha 2                                                             |
| 0,94 | PIP4K2A            | phosphatidylinositol-5-phosphate 4-kinase, type II, alpha                              |
| 0,94 | TTC1               | tetratricopeptide repeat domain 1                                                      |
| 0,94 | CSTF3              | cleavage stimulation factor, 3 pre-RNA, subunit 3                                      |
| 0,94 | FAM166B            | family with sequence similarity 166, member B                                          |
| 0,94 | HOXB8              | homeobox B8                                                                            |
| 0,94 | MGST2              | microsomal glutathione S-transferase 2                                                 |

|      |                                                      |                                                                                                                                                                                                                                          |
|------|------------------------------------------------------|------------------------------------------------------------------------------------------------------------------------------------------------------------------------------------------------------------------------------------------|
| 0,94 | HAUS7; TREX2                                         | HAUS augmin like complex subunit 7; three prime repair exonuclease 2                                                                                                                                                                     |
| 0,94 | SLK                                                  | STE20-like kinase                                                                                                                                                                                                                        |
| 0,94 | KRTAP5-1                                             | keratin associated protein 5-1                                                                                                                                                                                                           |
| 0,94 | CT47A5;<br>CT47A2;<br>CT47A1;<br>CT47A11;<br>CT47A12 | cancer/testis antigen family 47, member A5;<br>cancer/testis antigen family 47, member A2;<br>cancer/testis antigen family 47, member A1;<br>cancer/testis antigen family 47, member A11;<br>cancer/testis antigen family 47, member A12 |
| 0,94 | SLC39A9                                              | solute carrier family 39, member 9                                                                                                                                                                                                       |
| 0,94 | MEX3B                                                | mex-3 RNA binding family member B                                                                                                                                                                                                        |
| 0,94 | CYP4X1                                               | cytochrome P450, family 4, subfamily X, polypeptide 1                                                                                                                                                                                    |
| 0,94 | FUT6                                                 | fucosyltransferase 6 (alpha (1,3) fucosyltransferase)                                                                                                                                                                                    |
| 0,94 | GRIP2                                                | glutamate receptor interacting protein 2                                                                                                                                                                                                 |
| 0,94 | KIF15                                                | kinesin family member 15                                                                                                                                                                                                                 |
| 0,94 | ELAVL4                                               | ELAV like neuron-specific RNA binding protein 4                                                                                                                                                                                          |
| 0,94 | KRTAP13-4                                            | keratin associated protein 13-4                                                                                                                                                                                                          |
| 0,94 | ZNF92                                                | zinc finger protein 92                                                                                                                                                                                                                   |
| 0,94 | FNIP2                                                | folliculin interacting protein 2                                                                                                                                                                                                         |
| 0,94 | CHRNA6                                               | cholinergic receptor, nicotinic alpha 6                                                                                                                                                                                                  |
| 0,94 | NDRG3                                                | NDRG family member 3                                                                                                                                                                                                                     |
| 0,94 | BRCA2                                                | breast cancer 2, early onset                                                                                                                                                                                                             |
| 0,94 | GEN1                                                 | GEN1 Holliday junction 5 flap endonuclease                                                                                                                                                                                               |
| 0,94 | SLC35A2                                              | solute carrier family 35 (UDP-galactose transporter), member A2                                                                                                                                                                          |
| 0,94 | KIAA0040                                             | KIAA0040                                                                                                                                                                                                                                 |
| 0,94 | LOC100129940;<br>flanu; RP11-366L20.2                | uncharacterized LOC100129940; Transcript Identified by AceView; novel transcript, antisense to HMGA2                                                                                                                                     |
| 0,94 | GPRC5B                                               | G protein-coupled receptor, class C, group 5, member B                                                                                                                                                                                   |
| 0,94 | IL3RA                                                | interleukin 3 receptor, alpha (low affinity)                                                                                                                                                                                             |
| 0,94 | MSH3                                                 | mutS homolog 3                                                                                                                                                                                                                           |
| 0,94 | STAB1                                                | stabilin 1                                                                                                                                                                                                                               |
| 0,94 | TRAPPC3L                                             | trafficking protein particle complex 3-like                                                                                                                                                                                              |
| 0,94 | ZNF37A                                               | zinc finger protein 37A                                                                                                                                                                                                                  |
| 0,94 | GRIA3                                                | glutamate receptor, ionotropic, AMPA 3                                                                                                                                                                                                   |
| 0,94 | ACTL7B                                               | actin-like 7B                                                                                                                                                                                                                            |
| 0,94 | SSR4                                                 | signal sequence receptor, delta                                                                                                                                                                                                          |
| 0,94 | PDCD2L                                               | programmed cell death 2-like                                                                                                                                                                                                             |
| 0,94 | ECE1                                                 | endothelin converting enzyme 1                                                                                                                                                                                                           |
| 0,94 | CRTAC1                                               | cartilage acidic protein 1                                                                                                                                                                                                               |
| 0,94 | AKR7A3                                               | aldo-keto reductase family 7, member A3 (aflatoxin aldehyde reductase)                                                                                                                                                                   |
| 0,94 | MMS19                                                | MMS19 homolog, cytosolic iron-sulfur assembly component                                                                                                                                                                                  |
| 0,94 | TMEM40                                               | transmembrane protein 40                                                                                                                                                                                                                 |
| 0,94 | ATE1                                                 | arginyltransferase 1                                                                                                                                                                                                                     |
| 0,94 | SIM1                                                 | single-minded family bHLH transcription factor 1                                                                                                                                                                                         |

|      |                          |                                                                                                        |
|------|--------------------------|--------------------------------------------------------------------------------------------------------|
| 0,94 | MNT                      | MAX network transcriptional repressor                                                                  |
| 0,94 | KLHL8                    | kelch-like family member 8                                                                             |
| 0,94 | FCGR2A                   | Fc fragment of IgG, low affinity IIa, receptor (CD32)                                                  |
| 0,94 | GPAM                     | glycerol-3-phosphate acyltransferase, mitochondrial                                                    |
| 0,94 | MTRF1L                   | mitochondrial translational release factor 1-like                                                      |
| 0,94 | ZNF780B                  | zinc finger protein 780B                                                                               |
| 0,94 | VAR2                     | valyl-tRNA synthetase 2, mitochondrial                                                                 |
| 0,94 | CUL1                     | cullin 1                                                                                               |
| 0,94 | PYY                      | peptide YY                                                                                             |
| 0,94 | KCNC3                    | potassium channel, voltage gated Shaw related subfamily C, member 3                                    |
| 0,94 | APC                      | adenomatous polyposis coli                                                                             |
| 0,94 | TBL3                     | transducin (beta)-like 3                                                                               |
| 0,94 | SH2B2                    | Memczak2013 ANTISENSE, CDS, coding, INTERNAL best transcript NM_020979                                 |
| 0,94 | SLC35E2                  | solute carrier family 35, member E2                                                                    |
| 0,94 | RPS25                    | ribosomal protein S25                                                                                  |
| 0,94 | PPP1R9A                  | protein phosphatase 1, regulatory subunit 9A                                                           |
| 0,94 | PDSS2                    | prenyl (decaprenyl) diphosphate synthase, subunit 2                                                    |
| 0,94 | MIA; RAB4B;<br>MIA-RAB4B | melanoma inhibitory activity; RAB4B, member RAS oncogene family; MIA-RAB4B readthrough (NMD candidate) |
| 0,94 | PRIM2                    | primase, DNA, polypeptide 2 (58kDa)                                                                    |
| 0,94 | CHRNA7                   | cholinergic receptor, nicotinic alpha 7                                                                |
| 0,94 | FCRL3                    | Fc receptor-like 3                                                                                     |
| 0,94 | DNAJB9                   | DnaJ (Hsp40) homolog, subfamily B, member 9                                                            |
| 0,94 | ETS1                     | v-ets avian erythroblastosis virus E26 oncogene homolog 1                                              |
| 0,94 | OCEL1                    | occludin/ELL domain containing 1                                                                       |
| 0,94 | CAMKK2                   | calcium/calmodulin-dependent protein kinase kinase 2, beta                                             |
| 0,94 | ANKRD17                  | ankyrin repeat domain 17                                                                               |
| 0,94 | ZNF12                    | zinc finger protein 12                                                                                 |
| 0,94 | GNB4                     | guanine nucleotide binding protein (G protein), beta polypeptide 4                                     |
| 0,94 | MRPS11                   | mitochondrial ribosomal protein S11                                                                    |
| 0,94 | MRPL45                   | mitochondrial ribosomal protein L45                                                                    |
| 0,94 | RPLP0                    | ribosomal protein, large, P0                                                                           |
| 0,94 | METTL4                   | methyltransferase like 4                                                                               |
| 0,94 | C6orf89                  | chromosome 6 open reading frame 89                                                                     |
| 0,94 | CD320                    | CD320 molecule                                                                                         |
| 0,94 | PRMT6                    | protein arginine methyltransferase 6                                                                   |
| 0,94 | ZCCHC10                  | zinc finger, CCHC domain containing 10                                                                 |
| 0,94 | CBLN4                    | cerebellin 4 precursor                                                                                 |
| 0,94 | PEX5                     | peroxisomal biogenesis factor 5                                                                        |
| 0,94 | MYO1C                    | myosin IC                                                                                              |
| 0,94 | NAMPT                    | nicotinamide phosphoribosyltransferase                                                                 |
| 0,94 | GLTP                     | glycolipid transfer protein                                                                            |
| 0,94 | PLK4                     | polo-like kinase 4                                                                                     |
| 0,94 | SEC11A                   | SEC11 homolog A, signal peptidase complex subunit                                                      |

|      |                            |                                                                                                                                                                                                                                                                                                                                                             |
|------|----------------------------|-------------------------------------------------------------------------------------------------------------------------------------------------------------------------------------------------------------------------------------------------------------------------------------------------------------------------------------------------------------|
| 0,94 | NPY4R; CH17-360D5.1; PPYR1 | Homo sapiens neuropeptide Y receptor Y4 (NPY4R), transcript variant 2, mRNA.; neuropeptide Y receptor type 4-like; Homo sapiens pancreatic polypeptide receptor 1, mRNA (cDNA clone MGC:116895 IMAGE:40005502), complete cds.; Homo sapiens pancreatic polypeptide receptor 1, mRNA (cDNA clone MGC:116897 IMAGE:40005506), complete cds.; novel transcript |
| 0,94 | SNRNP48                    | small nuclear ribonucleoprotein, U11/U12 48KDa subunit                                                                                                                                                                                                                                                                                                      |
| 0,94 | PDCL                       | phosducin like                                                                                                                                                                                                                                                                                                                                              |
| 0,94 | DBT                        | dihydrolipoamide branched chain transacylase E2                                                                                                                                                                                                                                                                                                             |
| 0,94 | CAST                       | calpastatin                                                                                                                                                                                                                                                                                                                                                 |
| 0,94 | EPHA2                      | EPH receptor A2                                                                                                                                                                                                                                                                                                                                             |
| 0,94 | CUL7                       | cullin 7                                                                                                                                                                                                                                                                                                                                                    |
| 0,94 | ARMC10                     | armadillo repeat containing 10                                                                                                                                                                                                                                                                                                                              |
| 0,94 | E2F1                       | E2F transcription factor 1                                                                                                                                                                                                                                                                                                                                  |
| 0,94 | APOBEC3D                   | apolipoprotein B mRNA editing enzyme, catalytic polypeptide-like 3D                                                                                                                                                                                                                                                                                         |
| 0,94 | SMG1                       | SMG1 phosphatidylinositol 3-kinase-related kinase                                                                                                                                                                                                                                                                                                           |
| 0,94 | PHF3                       | PHD finger protein 3                                                                                                                                                                                                                                                                                                                                        |
| 0,94 | KDEL3                      | KDEL (Lys-Asp-Glu-Leu) endoplasmic reticulum protein retention receptor 3                                                                                                                                                                                                                                                                                   |
| 0,94 | KIF11                      | kinesin family member 11                                                                                                                                                                                                                                                                                                                                    |
| 0,94 | ST6GALNAC3                 | ST6 (alpha-N-acetylneuraminyl-2,3-beta-galactosyl-1,3)-N-acetylgalactosaminide alpha-2,6-sialyltransferase 3                                                                                                                                                                                                                                                |
| 0,94 | AKIP1                      | A kinase (PRKA) interacting protein 1                                                                                                                                                                                                                                                                                                                       |
| 0,94 | XCR1                       | chemokine (C motif) receptor 1                                                                                                                                                                                                                                                                                                                              |
| 0,94 | HSF2                       | heat shock transcription factor 2                                                                                                                                                                                                                                                                                                                           |
| 0,94 | SENP8                      | SUMO/sentrin peptidase family member, NEDD8 specific                                                                                                                                                                                                                                                                                                        |
| 0,94 | DYRK3                      | dual specificity tyrosine-(Y)-phosphorylation regulated kinase 3                                                                                                                                                                                                                                                                                            |
| 0,94 | PLEKHG7                    | pleckstrin homology domain containing, family G (with RhoGef domain) member 7                                                                                                                                                                                                                                                                               |
| 0,94 | CYB5RL                     | cytochrome b5 reductase-like                                                                                                                                                                                                                                                                                                                                |
| 0,94 | S100A5                     | S100 calcium binding protein A5                                                                                                                                                                                                                                                                                                                             |
| 0,94 | LACRT                      | lacritin                                                                                                                                                                                                                                                                                                                                                    |
| 0,94 | RAB3IP                     | RAB3A interacting protein                                                                                                                                                                                                                                                                                                                                   |
| 0,94 | MSMB                       | microseminoprotein, beta-                                                                                                                                                                                                                                                                                                                                   |
| 0,94 | LIPA                       | Transcript Identified by AceView, Entrez Gene ID(s) 3988                                                                                                                                                                                                                                                                                                    |
| 0,94 | ACSL5                      | acyl-CoA synthetase long-chain family member 5                                                                                                                                                                                                                                                                                                              |
| 0,94 | RAB42                      | RAB42, member RAS oncogene family                                                                                                                                                                                                                                                                                                                           |
| 0,94 | SRRM1                      | serine/arginine repetitive matrix 1                                                                                                                                                                                                                                                                                                                         |
| 0,94 | LINC01219                  | long intergenic non-protein coding RNA 1219                                                                                                                                                                                                                                                                                                                 |
| 0,94 | CCDC28B                    | coiled-coil domain containing 28B                                                                                                                                                                                                                                                                                                                           |
| 0,94 | LEFTY1                     | left-right determination factor 1                                                                                                                                                                                                                                                                                                                           |
| 0,94 | KIAA1147                   | KIAA1147                                                                                                                                                                                                                                                                                                                                                    |
| 0,94 | PANX2                      | pannexin 2                                                                                                                                                                                                                                                                                                                                                  |

|      |                    |                                                                                                |
|------|--------------------|------------------------------------------------------------------------------------------------|
| 0,94 | PK4                | pyruvate dehydrogenase kinase, isozyme 4                                                       |
| 0,94 | JSRP1              | junctional sarcoplasmic reticulum protein 1                                                    |
| 0,94 | POLR2M             | polymerase (RNA) II (DNA directed) polypeptide M                                               |
| 0,94 | SLC30A9            | solute carrier family 30 (zinc transporter), member 9                                          |
| 0,94 | GLIPR2             | GLI pathogenesis-related 2                                                                     |
| 0,94 | ARPP21             | Transcript Identified by AceView, Entrez Gene ID(s)<br>10777                                   |
| 0,94 | CUL3               | cullin 3                                                                                       |
| 0,94 | CHTF8              | Jeck2013 ANTISENSE, coding, INTERNAL,<br>OVEXON, UTR3 best transcript NM_001039690             |
| 0,94 | MBD5               | methyl-CpG binding domain protein 5                                                            |
| 0,94 | ARL3               | ADP-ribosylation factor like GTPase 3                                                          |
| 0,94 | PDE10A             | phosphodiesterase 10A                                                                          |
| 0,94 | KIAA1429           | KIAA1429                                                                                       |
| 0,94 | BIN1               | bridging integrator 1                                                                          |
| 0,94 | CXorf58            | chromosome X open reading frame 58                                                             |
| 0,94 | PGM2               | phosphoglucomutase 2                                                                           |
| 0,94 | HDHD2              | haloacid dehalogenase-like hydrolase domain<br>containing 2                                    |
| 0,94 | HSD17B14           | hydroxysteroid (17-beta) dehydrogenase 14                                                      |
| 0,94 | SLC37A4            | solute carrier family 37 (glucose-6-phosphate<br>transporter), member 4                        |
| 0,94 | CMTM8              | CKLF-like MARVEL transmembrane domain<br>containing 8                                          |
| 0,94 | KCNJ10             | potassium channel, inwardly rectifying subfamily J,<br>member 10                               |
| 0,94 | SLN                | sarcolipin                                                                                     |
| 0,94 | PSG7               | pregnancy specific beta-1-glycoprotein 7<br>(gene/pseudogene)                                  |
| 0,94 | HNRNPCL2           | heterogeneous nuclear ribonucleoprotein C-like 2                                               |
| 0,94 | SLC25A4            | solute carrier family 25 (mitochondrial carrier; adenine<br>nucleotide translocator), member 4 |
| 0,94 | ARHGAP19-<br>SLIT1 | ARHGAP19-SLIT1 readthrough (NMD candidate)                                                     |
| 0,94 | MYL3               | myosin, light chain 3, alkali; ventricular, skeletal, slow                                     |
| 0,94 | RNF123             | ring finger protein 123                                                                        |
| 0,94 | CYP2D6             | cytochrome P450, family 2, subfamily D, polypeptide 6                                          |
| 0,94 | RPS11;<br>SNORD35B | ribosomal protein S11; small nucleolar RNA, C/D box<br>35B                                     |
| 0,94 | MED21              | mediator complex subunit 21                                                                    |
| 0,94 | SIL1               | SIL1 nucleotide exchange factor                                                                |
| 0,94 | FAM92A1            | family with sequence similarity 92, member A1                                                  |
| 0,94 | ZNF330             | zinc finger protein 330                                                                        |
| 0,94 | CBR1               | carbonyl reductase 1                                                                           |
| 0,94 | ZNF7               | zinc finger protein 7                                                                          |
| 0,94 | ANGPTL7            | angiopoietin like 7                                                                            |
| 0,94 | ERBB3              | erb-b2 receptor tyrosine kinase 3                                                              |
| 0,94 | ABCB10             | ATP binding cassette subfamily B member 10                                                     |

|      |                    |                                                                                                                                        |
|------|--------------------|----------------------------------------------------------------------------------------------------------------------------------------|
| 0,94 | CERKL              | ceramide kinase like                                                                                                                   |
| 0,94 | FAM71A             | family with sequence similarity 71, member A                                                                                           |
| 0,94 | TMTC2              | transmembrane and tetratricopeptide repeat containing 2                                                                                |
| 0,94 | CYP4Z1             | cytochrome P450, family 4, subfamily Z, polypeptide 1                                                                                  |
| 0,94 | NAV3               | neuron navigator 3                                                                                                                     |
| 0,94 | LIPT1              | lipoyltransferase 1                                                                                                                    |
| 0,94 | OR10A6             | olfactory receptor, family 10, subfamily A, member 6 (gene/pseudogene)                                                                 |
| 0,94 | GALNT8             | polypeptide N-acetylgalactosaminyltransferase 8                                                                                        |
| 0,94 | C3orf58            | chromosome 3 open reading frame 58                                                                                                     |
| 0,94 | RYK                | receptor-like tyrosine kinase                                                                                                          |
| 0,94 | GLYATL2            | glycine-N-acyltransferase-like 2                                                                                                       |
| 0,94 | FOXI2              | forkhead box I2                                                                                                                        |
| 0,94 | TRMT10A            | tRNA methyltransferase 10A                                                                                                             |
| 0,94 | UTS2B              | urotensin 2B                                                                                                                           |
| 0,94 | OR5AL1             | olfactory receptor, family 5, subfamily AL, member 1 (gene/pseudogene)                                                                 |
| 0,94 | PYCR1              | pyrroline-5-carboxylate reductase 1                                                                                                    |
| 0,94 | CMTR1              | cap methyltransferase 1                                                                                                                |
| 0,94 | IGF2-AS            | IGF2 antisense RNA                                                                                                                     |
| 0,94 | DCAF12L2           | DDB1 and CUL4 associated factor 12-like 2                                                                                              |
| 0,94 | DPYSL3             | dihydropyrimidinase-like 3                                                                                                             |
| 0,94 | SF3B1              | splicing factor 3b, subunit 1, 155kDa                                                                                                  |
| 0,94 | INO80B-WBP1        | INO80B-WBP1 readthrough (NMD candidate)                                                                                                |
| 0,94 | C16orf78           | chromosome 16 open reading frame 78                                                                                                    |
| 0,94 | STAM               | Memczak2013 ALT_ACCEPTOR, ALT_DONOR, INTERNAL, intronic, ncRNA best transcript NR_037774                                               |
| 0,94 | TREM2              | triggering receptor expressed on myeloid cells 2                                                                                       |
| 0,94 | TDRD1              | tudor domain containing 1                                                                                                              |
| 0,94 | RP4-728D4.2; PSMB2 | novel transcript; Transcript Identified by AceView, Entrez Gene ID(s) 5690                                                             |
| 0,94 | GPR144; ADGRD2     | Transcript Identified by AceView, Entrez Gene ID(s) 347088; adhesion G protein-coupled receptor D2 [Source:HGNC Symbol;Acc:HGNC:18651] |
| 0,94 | GNA11              | guanine nucleotide binding protein (G protein), alpha 11 (Gq class)                                                                    |
| 0,94 | NFIA               | nuclear factor I/A                                                                                                                     |
| 0,94 | PARL               | presenilin associated, rhomboid-like                                                                                                   |
| 0,94 | MAEA               | macrophage erythroblast attacher                                                                                                       |
| 0,94 | SUSD5              | sushi domain containing 5                                                                                                              |
| 0,94 | MDFI               | MyoD family inhibitor                                                                                                                  |
| 0,94 | NUBPL              | nucleotide binding protein-like                                                                                                        |
| 0,94 | NDST2              | N-deacetylase/N-sulfotransferase (heparan glucosaminyl) 2                                                                              |
| 0,94 | TBC1D16            | TBC1 domain family, member 16                                                                                                          |
| 0,94 | DCPS               | decapping enzyme, scavenger                                                                                                            |
| 0,94 | DENND1B            | DENN/MADD domain containing 1B                                                                                                         |

|      |                                         |                                                                                                                 |
|------|-----------------------------------------|-----------------------------------------------------------------------------------------------------------------|
| 0,94 | LYRM7                                   | LYR motif containing 7                                                                                          |
| 0,94 | NDUFAF5                                 | NADH dehydrogenase (ubiquinone) complex I, assembly factor 5                                                    |
| 0,94 | TENM4                                   | teneurin transmembrane protein 4                                                                                |
| 0,94 | SEL1L2                                  | sel-1 suppressor of lin-12-like 2 (C. elegans)                                                                  |
| 0,94 | ARPC3                                   | actin related protein 2/3 complex subunit 3                                                                     |
| 0,94 | TLE2                                    | transducin-like enhancer of split 2                                                                             |
| 0,94 | MAP3K4                                  | mitogen-activated protein kinase kinase kinase 4                                                                |
| 0,94 | HCAR1                                   | hydroxycarboxylic acid receptor 1                                                                               |
| 0,94 | SPATA4                                  | spermatogenesis associated 4                                                                                    |
| 0,94 | IKBIP                                   | IKBKB interacting protein                                                                                       |
| 0,94 | USP17L18;<br>USP17L11                   | ubiquitin specific peptidase 17-like family member 18;<br>ubiquitin specific peptidase 17-like family member 11 |
| 0,94 | RAB41                                   | RAB41, member RAS oncogene family                                                                               |
| 0,94 | SPAG16                                  | sperm associated antigen 16                                                                                     |
| 0,94 | GTF2A1L;<br>STON1-<br>GTF2A1L;<br>STON1 | general transcription factor IIA 1-like; STON1-<br>GTF2A1L readthrough; stonin 1                                |
| 0,94 | GPRC5C                                  | G protein-coupled receptor, class C, group 5, member C                                                          |
| 0,94 | LOC441155                               | zinc finger CCCH-type domain-containing-like                                                                    |
| 0,94 | MMP23B;<br>MMP23A                       | matrix metalloproteinase 23B; matrix metalloproteinase 23A (pseudogene)                                         |
| 0,94 | SMARCC2                                 | SWI/SNF related, matrix associated, actin dependent regulator of chromatin, subfamily c, member 2               |
| 0,94 | OR10Z1                                  | olfactory receptor, family 10, subfamily Z, member 1                                                            |
| 0,94 | PLOD2                                   | procollagen-lysine, 2-oxoglutarate 5-dioxygenase 2                                                              |
| 0,94 | ARMC2                                   | armadillo repeat containing 2                                                                                   |
| 0,94 | SHBG                                    | sex hormone-binding globulin                                                                                    |
| 0,94 | FADS1; MIR1908                          | fatty acid desaturase 1; microRNA 1908                                                                          |
| 0,94 | DEF6                                    | Memczak2013 ANTISENSE, CDS, coding, INTERNAL best transcript NM_022047                                          |
| 0,94 | ALG9                                    | ALG9, alpha-1,2-mannosyltransferase                                                                             |
| 0,94 | NPIPB15                                 | nuclear pore complex interacting protein family, member B15                                                     |
| 0,94 | WDR24                                   | WD repeat domain 24                                                                                             |
| 0,94 | SLC17A1                                 | solute carrier family 17 (organic anion transporter), member 1                                                  |
| 0,94 | CST4                                    | cystatin S                                                                                                      |
| 0,94 | KATNB1                                  | katanin p80 (WD repeat containing) subunit B 1                                                                  |
| 0,94 | APCDD1                                  | adenomatosis polyposis coli down-regulated 1                                                                    |
| 0,94 | ZBED6;<br>ZC3H11A                       | zinc finger, BED-type containing 6; zinc finger CCCH-type containing 11A                                        |
| 0,94 | VANGL2                                  | VANGL planar cell polarity protein 2                                                                            |
| 0,94 | POP5                                    | POP5 homolog, ribonuclease P/MRP subunit                                                                        |
| 0,94 | TRIM61                                  | tripartite motif containing 61                                                                                  |
| 0,94 | FGFR2                                   | fibroblast growth factor receptor 2                                                                             |

|      |                         |                                                                              |
|------|-------------------------|------------------------------------------------------------------------------|
| 0,94 | ATP6V1H                 | ATPase, H <sup>+</sup> transporting, lysosomal 50/57kDa, V1 subunit H        |
| 0,94 | CCDC12                  | coiled-coil domain containing 12                                             |
| 0,94 | OR10K2                  | olfactory receptor, family 10, subfamily K, member 2                         |
| 0,94 | NFYB                    | nuclear transcription factor Y subunit beta                                  |
| 0,94 | RPARP-AS1               | RPARP antisense RNA 1                                                        |
| 0,94 | OR52E4                  | olfactory receptor, family 52, subfamily E, member 4                         |
| 0,94 | TTC23                   | tetratricopeptide repeat domain 23                                           |
| 0,94 | ADAMTS13                | ADAM metalloproteinase with thrombospondin type 1 motif 13                   |
| 0,94 | ZNF234                  | zinc finger protein 234                                                      |
| 0,94 | GRIPAP1                 | GRIP1 associated protein 1                                                   |
| 0,94 | CPEB1                   | cytoplasmic polyadenylation element binding protein 1                        |
| 0,94 | EFNA4                   | ephrin-A4                                                                    |
| 0,94 | NYX                     | nyctalopin                                                                   |
| 0,94 | PTP4A1                  | protein tyrosine phosphatase type IVA, member 1                              |
| 0,94 | ZFP69                   | ZFP69 zinc finger protein                                                    |
| 0,94 | PPP1R37                 | protein phosphatase 1, regulatory subunit 37                                 |
| 0,94 | MYLPF                   | myosin light chain, phosphorylatable, fast skeletal muscle                   |
| 0,94 | XPNPEP2                 | X-prolyl aminopeptidase (aminopeptidase P) 2, membrane-bound                 |
| 0,94 | COX7B2                  | cytochrome c oxidase subunit VIIb2                                           |
| 0,94 | C10orf111               | chromosome 10 open reading frame 111                                         |
| 0,94 | AACSP1                  | acetoacetyl-CoA synthetase pseudogene 1                                      |
| 0,94 | NMNAT3                  | nicotinamide nucleotide adenyltransferase 3                                  |
| 0,94 | ITIH5                   | inter-alpha-trypsin inhibitor heavy chain family, member 5                   |
| 0,94 | TNNC1                   | troponin C type 1 (slow)                                                     |
| 0,94 | MAGED1                  | MAGE family member D1                                                        |
| 0,94 | SH3RF2                  | SH3 domain containing ring finger 2                                          |
| 0,94 | PRR33                   | proline rich 33                                                              |
| 0,94 | TLR7                    | toll-like receptor 7                                                         |
| 0,94 | SEC24B                  | SEC24 homolog B, COPII coat complex component                                |
| 0,94 | MSANTD4                 | Myb/SANT-like DNA-binding domain containing 4 with coiled-coils              |
| 0,94 | CEP120                  | centrosomal protein 120kDa                                                   |
| 0,94 | CENPK                   | centromere protein K                                                         |
| 0,94 | MIER1                   | mesoderm induction early response 1, transcriptional regulator               |
| 0,94 | PKD1L1                  | polycystic kidney disease 1 like 1                                           |
| 0,94 | ARHGEF9;<br>ARHGEF9-IT1 | Cdc42 guanine nucleotide exchange factor 9;<br>ARHGEF9 intronic transcript 1 |
| 0,94 | FBXO21                  | F-box protein 21                                                             |
| 0,94 | DCD                     | dermcidin                                                                    |
| 0,94 | PI4KAP1                 | phosphatidylinositol 4-kinase, catalytic, alpha pseudogene 1                 |
| 0,94 | LCA5                    | Leber congenital amaurosis 5                                                 |

|      |                                                          |                                                                                                                                                                                                      |
|------|----------------------------------------------------------|------------------------------------------------------------------------------------------------------------------------------------------------------------------------------------------------------|
| 0,94 | TMEM110-MUSTN1;<br>TMEM110                               | TMEM110-MUSTN1 readthrough; transmembrane protein 110                                                                                                                                                |
| 0,94 | RPL41                                                    | Synthetic construct Homo sapiens clone IMAGE:100063377, MGC:190767 ribosomal protein L41 (RPL41) mRNA, encodes complete protein.; 60S ribosomal protein L41 [Source:UniProtKB/Swiss-Prot;Acc:P62945] |
| 0,94 | SLC12A5                                                  | solute carrier family 12 (potassium/chloride transporter), member 5                                                                                                                                  |
| 0,94 | ZNF280D                                                  | zinc finger protein 280D                                                                                                                                                                             |
| 0,94 | HYOU1                                                    | hypoxia up-regulated 1                                                                                                                                                                               |
| 0,94 | PIP4K2C                                                  | phosphatidylinositol-5-phosphate 4-kinase, type II, gamma                                                                                                                                            |
| 0,94 | VPS11                                                    | VPS11, CORVET/HOPS core subunit [Source:HGNC Symbol;Acc:HGNC:14583]                                                                                                                                  |
| 0,94 | ZNF835                                                   | zinc finger protein 835                                                                                                                                                                              |
| 0,94 | KIAA1191                                                 | KIAA1191                                                                                                                                                                                             |
| 0,94 | WNT8A                                                    | wingless-type MMTV integration site family, member 8A                                                                                                                                                |
| 0,94 | OR5H2                                                    | olfactory receptor, family 5, subfamily H, member 2                                                                                                                                                  |
| 0,94 | IKZF3                                                    | IKAROS family zinc finger 3                                                                                                                                                                          |
| 0,94 | OR6B3                                                    | olfactory receptor, family 6, subfamily B, member 3                                                                                                                                                  |
| 0,94 | MOB3C                                                    | MOB kinase activator 3C                                                                                                                                                                              |
| 0,94 | ZSCAN16                                                  | zinc finger and SCAN domain containing 16                                                                                                                                                            |
| 0,94 | TLDC1                                                    | TBC/LysM-associated domain containing 1                                                                                                                                                              |
| 0,94 | RPL7A;<br>SNORD36C;<br>SNORD36B;<br>SNORD24;<br>SNORD36A | ribosomal protein L7a; small nucleolar RNA, C/D box 36C; small nucleolar RNA, C/D box 36B; small nucleolar RNA, C/D box 24; small nucleolar RNA, C/D box 36A                                         |
| 0,94 | DMTN                                                     | dematin actin binding protein                                                                                                                                                                        |
| 0,94 | SDF2                                                     | stromal cell-derived factor 2                                                                                                                                                                        |
| 0,94 | MYT1L                                                    | Transcript Identified by AceView, Entrez Gene ID(s) 23040                                                                                                                                            |
| 0,94 | SARNP                                                    | SAP domain containing ribonucleoprotein                                                                                                                                                              |
| 0,94 | NAT1                                                     | N-acetyltransferase 1 (arylamine N-acetyltransferase)                                                                                                                                                |
| 0,94 | RNASEH2A                                                 | ribonuclease H2, subunit A                                                                                                                                                                           |
| 0,94 | PLXDC2                                                   | plexin domain containing 2                                                                                                                                                                           |
| 0,94 | JOSD2                                                    | Josephin domain containing 2                                                                                                                                                                         |
| 0,94 | KIFC3                                                    | Jeck2013 ANTISENSE, coding, INTERNAL, intronic best transcript NM_001130100                                                                                                                          |
| 0,94 | CSNK2A2                                                  | casein kinase 2, alpha prime polypeptide                                                                                                                                                             |
| 0,94 | HTR5A                                                    | 5-hydroxytryptamine (serotonin) receptor 5A, G protein-coupled                                                                                                                                       |
| 0,94 | URB2                                                     | URB2 ribosome biogenesis 2 homolog (S. cerevisiae)                                                                                                                                                   |
| 0,94 | C3orf80                                                  | chromosome 3 open reading frame 80                                                                                                                                                                   |
| 0,94 | GOLGA1                                                   | golgin A1                                                                                                                                                                                            |
| 0,94 | ACTR1B                                                   | ARP1 actin-related protein 1 homolog B, centractin beta (yeast)                                                                                                                                      |
| 0,94 | FAM132A                                                  | family with sequence similarity 132, member A                                                                                                                                                        |

|      |                |                                                                                                                  |
|------|----------------|------------------------------------------------------------------------------------------------------------------|
| 0,94 | TUBG2          | tubulin, gamma 2                                                                                                 |
| 0,94 | SCRN3          | secernin 3                                                                                                       |
| 0,94 | ZFR            | zinc finger RNA binding protein                                                                                  |
| 0,94 | GTF3C4         | general transcription factor IIIC subunit 4                                                                      |
| 0,94 | LOXL4          | lysyl oxidase-like 4                                                                                             |
| 0,94 | CLIC4          | chloride intracellular channel 4                                                                                 |
| 0,94 | MISP           | mitotic spindle positioning                                                                                      |
| 0,94 | C7orf72        | chromosome 7 open reading frame 72                                                                               |
| 0,94 | LARP4B         | La ribonucleoprotein domain family, member 4B                                                                    |
| 0,94 | FTMT           | ferritin mitochondrial                                                                                           |
| 0,94 | CD1D           | CD1d molecule                                                                                                    |
| 0,94 | CXorf67        | chromosome X open reading frame 67                                                                               |
| 0,94 | MYOD1          | myogenic differentiation 1                                                                                       |
| 0,94 | HELZ           | helicase with zinc finger                                                                                        |
| 0,94 | ADIPOQ         | adiponectin, C1Q and collagen domain containing                                                                  |
| 0,94 | FAM160B2       | family with sequence similarity 160, member B2                                                                   |
| 0,94 | PFDN6; MIR6834 | prefoldin subunit 6; microRNA 6834                                                                               |
| 0,94 | SBF1           | SET binding factor 1                                                                                             |
| 0,94 | KCNK15         | potassium channel, two pore domain subfamily K, member 15                                                        |
| 0,94 | SUDS3          | SDS3 homolog, SIN3A corepressor complex component                                                                |
| 0,94 | ARHGEF4        | Rho guanine nucleotide exchange factor 4                                                                         |
| 0,94 | FAM78A         | family with sequence similarity 78, member A                                                                     |
| 0,94 | GJA10          | gap junction protein alpha 10                                                                                    |
| 0,94 | sep-01         | septin 1                                                                                                         |
| 0,94 | C2orf27B       | chromosome 2 open reading frame 27B                                                                              |
| 0,94 | ZNF236         | zinc finger protein 236                                                                                          |
| 0,94 | SERPINA6       | serpin peptidase inhibitor, clade A (alpha-1 antiproteinase, antitrypsin), member 6                              |
| 0,94 | PAFAH1B1       | platelet-activating factor acetylhydrolase 1b, regulatory subunit 1 (45kDa)                                      |
| 0,94 | TMEM229B       | transmembrane protein 229B                                                                                       |
| 0,94 | RECK           | reversion-inducing-cysteine-rich protein with kazal motifs                                                       |
| 0,94 | sep-14         | septin 14                                                                                                        |
| 0,94 | VPRBP          | Vpr (HIV-1) binding protein                                                                                      |
| 0,94 | MICA           | MHC class I polypeptide-related sequence A                                                                       |
| 0,94 | DNMT3A         | DNA (cytosine-5-)-methyltransferase 3 alpha                                                                      |
| 0,94 | ZNF211         | zinc finger protein 211                                                                                          |
| 0,94 | IRF9           | interferon regulatory factor 9                                                                                   |
| 0,94 | CA7            | carbonic anhydrase VII                                                                                           |
| 0,94 | LRRK1          | leucine-rich repeat kinase 1                                                                                     |
| 0,94 | LCE5A          | late cornified envelope 5A                                                                                       |
| 0,94 | SEMA4F         | sema domain, immunoglobulin domain (Ig), transmembrane domain (TM) and short cytoplasmic domain, (semaphorin) 4F |
| 0,94 | DNM1           | dynammin 1                                                                                                       |
| 0,94 | CDK13          | cyclin-dependent kinase 13                                                                                       |

|      |                          |                                                                                                                                      |
|------|--------------------------|--------------------------------------------------------------------------------------------------------------------------------------|
| 0,94 | GMEB2                    | glucocorticoid modulatory element binding protein 2                                                                                  |
| 0,94 | ATG101                   | autophagy related 101                                                                                                                |
| 0,94 | SMAD2                    | SMAD family member 2                                                                                                                 |
| 0,94 | MNX1                     | motor neuron and pancreas homeobox 1                                                                                                 |
| 0,94 | GOLGA8J                  | golgin A8 family, member J                                                                                                           |
| 0,94 | VSX1                     | visual system homeobox 1                                                                                                             |
| 0,94 | GAL3ST2                  | galactose-3-O-sulfotransferase 2                                                                                                     |
| 0,94 | CCDC84                   | coiled-coil domain containing 84                                                                                                     |
| 0,94 | PI4K2B                   | phosphatidylinositol 4-kinase type 2 beta                                                                                            |
| 0,94 | EXOG                     | endo/exonuclease (5-3), endonuclease G-like                                                                                          |
| 0,94 | NBPF26                   | neuroblastoma breakpoint family, member 26                                                                                           |
| 0,94 | OR5K4                    | olfactory receptor, family 5, subfamily K, member 4                                                                                  |
| 0,94 | BTG2                     | BTG family, member 2                                                                                                                 |
| 0,94 | BIVM                     | basic, immunoglobulin-like variable motif containing                                                                                 |
| 0,94 | LOC101929319;<br>TNFAIP6 | uncharacterized LOC101929319; Salzman2013<br>ANTISENSE, CDS, coding, INTERNAL, intronic,<br>OVCODE, OVEXON best transcript NM_007115 |
| 0,94 | MRPL55                   | mitochondrial ribosomal protein L55                                                                                                  |
| 0,94 | SH3GLB1                  | SH3-domain GRB2-like endophilin B1                                                                                                   |
| 0,93 | TRAF2                    | TNF receptor-associated factor 2                                                                                                     |
| 0,93 | DERL3                    | derlin 3                                                                                                                             |
| 0,93 | ZNF385D                  | zinc finger protein 385D                                                                                                             |
| 0,93 | P3H2                     | prolyl 3-hydroxylase 2                                                                                                               |
| 0,93 | ITGB6                    | integrin beta 6                                                                                                                      |
| 0,93 | LAMC1                    | laminin, gamma 1 (formerly LAMB2)                                                                                                    |
| 0,93 | HIST1H1B                 | histone cluster 1, H1b                                                                                                               |
| 0,93 | NDUFA4L2                 | NADH dehydrogenase (ubiquinone) 1 alpha<br>subcomplex, 4-like 2                                                                      |
| 0,93 | CLCNKA                   | chloride channel, voltage-sensitive Ka                                                                                               |
| 0,93 | C12orf49                 | chromosome 12 open reading frame 49                                                                                                  |
| 0,93 | ARHGAP17                 | Memczak2013 ALT_ACCEPTOR, ALT_DONOR,<br>coding, INTERNAL, intronic best transcript<br>NM_001006634                                   |
| 0,93 | CTAGE5                   | CTAGE family, member 5                                                                                                               |
| 0,93 | SIGLEC1                  | sialic acid binding Ig-like lectin 1, sialoadhesin                                                                                   |
| 0,93 | POGZ                     | pogo transposable element with ZNF domain                                                                                            |
| 0,93 | TCEAL2                   | transcription elongation factor A (SII)-like 2                                                                                       |
| 0,93 | B3GAT3                   | beta-1,3-glucuronyltransferase 3                                                                                                     |
| 0,93 | TAPT1                    | transmembrane anterior posterior transformation 1                                                                                    |
| 0,93 | TRIP12                   | Transcript Identified by AceView, Entrez Gene ID(s)<br>9320                                                                          |
| 0,93 | PCSK2                    | Transcript Identified by AceView, Entrez Gene ID(s)<br>5126                                                                          |
| 0,93 | CEP192                   | centrosomal protein 192kDa                                                                                                           |
| 0,93 | TTC7A                    | tetratricopeptide repeat domain 7A                                                                                                   |
| 0,93 | CYP2E1                   | cytochrome P450, family 2, subfamily E, polypeptide 1                                                                                |
| 0,93 | RBBP7                    | retinoblastoma binding protein 7                                                                                                     |
| 0,93 | ARL9                     | ADP-ribosylation factor like GTPase 9                                                                                                |
| 0,93 | FAIM                     | Fas apoptotic inhibitory molecule                                                                                                    |

|      |                      |                                                                                                 |
|------|----------------------|-------------------------------------------------------------------------------------------------|
| 0,93 | FAM103A1             | family with sequence similarity 103, member A1                                                  |
| 0,93 | CHD4                 | chromodomain helicase DNA binding protein 4                                                     |
| 0,93 | COQ10A               | coenzyme Q10A                                                                                   |
| 0,93 | TBX10                | T-box 10                                                                                        |
| 0,93 | ZNF511               | zinc finger protein 511                                                                         |
| 0,93 | OR4S1                | olfactory receptor, family 4, subfamily S, member 1                                             |
| 0,93 | DUSP6                | dual specificity phosphatase 6                                                                  |
| 0,93 | CLDN17               | claudin 17                                                                                      |
| 0,93 | POMK                 | protein-O-mannose kinase                                                                        |
| 0,93 | PPP2R2C              | protein phosphatase 2, regulatory subunit B, gamma                                              |
| 0,93 | GTF2IRD2B            | GTF2I repeat domain containing 2B                                                               |
| 0,93 | FAM134A              | family with sequence similarity 134, member A                                                   |
| 0,93 | AC010894.3;<br>SCRN3 | novel transcript; Transcript Identified by AceView,<br>Entrez Gene ID(s) 79634                  |
| 0,93 | RAET1E               | retinoic acid early transcript 1E                                                               |
| 0,93 | TRIM69               | tripartite motif containing 69                                                                  |
| 0,93 | ATP6AP1              | ATPase, H <sup>+</sup> transporting, lysosomal accessory protein<br>1                           |
| 0,93 | PODN                 | podocan                                                                                         |
| 0,93 | FAM193A              | family with sequence similarity 193, member A                                                   |
| 0,93 | PHGR1                | proline/histidine/glycine-rich 1                                                                |
| 0,93 | GSTO1                | glutathione S-transferase omega 1                                                               |
| 0,93 | ABCA3                | ATP binding cassette subfamily A member 3                                                       |
| 0,93 | MRO                  | maestro                                                                                         |
| 0,93 | ENOSF1               | enolase superfamily member 1                                                                    |
| 0,93 | FAM195B              | family with sequence similarity 195, member B                                                   |
| 0,93 | PCNA                 | proliferating cell nuclear antigen                                                              |
| 0,93 | SH2D2A               | SH2 domain containing 2A                                                                        |
| 0,93 | ABHD6                | abhydrolase domain containing 6                                                                 |
| 0,93 | NUDT16L1             | nudix hydrolase 16 like 1                                                                       |
| 0,93 | DHX34                | DEAH (Asp-Glu-Ala-His) box polypeptide 34                                                       |
| 0,93 | AQP3                 | aquaporin 3 (Gill blood group)                                                                  |
| 0,93 | TSHZ1                | teashirt zinc finger homeobox 1                                                                 |
| 0,93 | PLEKHA3              | pleckstrin homology domain containing, family A<br>(phosphoinositide binding specific) member 3 |
| 0,93 | ARFGEF1              | ADP-ribosylation factor guanine nucleotide-exchange<br>factor 1 (brefeldin A-inhibited)         |
| 0,93 | CDKN1B               | cyclin-dependent kinase inhibitor 1B (p27, Kip1)                                                |
| 0,93 | RAB38                | RAB38, member RAS oncogene family                                                               |
| 0,93 | HGSNAT               | Transcript Identified by AceView, Entrez Gene ID(s)<br>138050                                   |
| 0,93 | RUNDC3B              | RUN domain containing 3B                                                                        |
| 0,93 | HMGN3                | high mobility group nucleosomal binding domain 3                                                |
| 0,93 | SERTM1               | serine-rich and transmembrane domain containing 1                                               |
| 0,93 | FBL                  | fibrillarin                                                                                     |
| 0,93 | C5orf24              | chromosome 5 open reading frame 24                                                              |
| 0,93 | PRPSAP1              | phosphoribosyl pyrophosphate synthetase-associated<br>protein 1                                 |
| 0,93 | GLS2                 | glutaminase 2 (liver, mitochondrial)                                                            |

|      |                                           |                                                                                                                                                                                                                                                                                                                                                                     |
|------|-------------------------------------------|---------------------------------------------------------------------------------------------------------------------------------------------------------------------------------------------------------------------------------------------------------------------------------------------------------------------------------------------------------------------|
| 0,93 | CHCHD5                                    | coiled-coil-helix-coiled-coil-helix domain containing 5                                                                                                                                                                                                                                                                                                             |
| 0,93 | NCR3LG1                                   | natural killer cell cytotoxicity receptor 3 ligand 1                                                                                                                                                                                                                                                                                                                |
| 0,93 | ZNF653                                    | zinc finger protein 653                                                                                                                                                                                                                                                                                                                                             |
| 0,93 | CRMP1                                     | collapsin response mediator protein 1                                                                                                                                                                                                                                                                                                                               |
| 0,93 | CFHR4                                     | complement factor H-related 4                                                                                                                                                                                                                                                                                                                                       |
| 0,93 | HKDC1                                     | hexokinase domain containing 1                                                                                                                                                                                                                                                                                                                                      |
| 0,93 | TTC21A;<br>MIR6822                        | tetratricopeptide repeat domain 21A; microRNA 6822                                                                                                                                                                                                                                                                                                                  |
| 0,93 | KRT28                                     | keratin 28, type I                                                                                                                                                                                                                                                                                                                                                  |
| 0,93 | FAM104B                                   | family with sequence similarity 104, member B                                                                                                                                                                                                                                                                                                                       |
| 0,93 | IDI2                                      | isopentenyl-diphosphate delta isomerase 2                                                                                                                                                                                                                                                                                                                           |
| 0,93 | NCSTN                                     | nicastrin                                                                                                                                                                                                                                                                                                                                                           |
| 0,93 | PCED1A                                    | PC-esterase domain containing 1A                                                                                                                                                                                                                                                                                                                                    |
| 0,93 | NBPF14                                    | neuroblastoma breakpoint family, member 14                                                                                                                                                                                                                                                                                                                          |
| 0,93 | TEX29                                     | testis expressed 29                                                                                                                                                                                                                                                                                                                                                 |
| 0,93 | PSG9                                      | pregnancy specific beta-1-glycoprotein 9                                                                                                                                                                                                                                                                                                                            |
| 0,93 | C1orf123                                  | chromosome 1 open reading frame 123                                                                                                                                                                                                                                                                                                                                 |
| 0,93 | LRR1; RHOQP1                              | leucine rich repeat protein 1; ras homolog family member Q pseudogene 1                                                                                                                                                                                                                                                                                             |
| 0,93 | SERTAD1                                   | SERTA domain containing 1                                                                                                                                                                                                                                                                                                                                           |
| 0,93 | NRDE2                                     | NRDE-2, necessary for RNA interference, domain containing                                                                                                                                                                                                                                                                                                           |
| 0,93 | MZT2A;<br>MIR4784                         | mitotic spindle organizing protein 2A; microRNA 4784                                                                                                                                                                                                                                                                                                                |
| 0,93 | TRAPPC2L                                  | trafficking protein particle complex 2-like                                                                                                                                                                                                                                                                                                                         |
| 0,93 | TNRC6B                                    | trinucleotide repeat containing 6B                                                                                                                                                                                                                                                                                                                                  |
| 0,93 | TMEM52B                                   | transmembrane protein 52B                                                                                                                                                                                                                                                                                                                                           |
| 0,93 | KIF21B                                    | kinesin family member 21B                                                                                                                                                                                                                                                                                                                                           |
| 0,93 | MEF2A                                     | myocyte enhancer factor 2A                                                                                                                                                                                                                                                                                                                                          |
| 0,93 | TECTB                                     | tectorin beta                                                                                                                                                                                                                                                                                                                                                       |
| 0,93 | EIF2B3                                    | eukaryotic translation initiation factor 2B, subunit 3 gamma, 58kDa                                                                                                                                                                                                                                                                                                 |
| 0,93 | CREBZF                                    | CREB/ATF bZIP transcription factor                                                                                                                                                                                                                                                                                                                                  |
| 0,93 | FAM103A1                                  | Homo sapiens family with sequence similarity 103, member A1, mRNA (cDNA clone MGC:2560 IMAGE:2989772), complete cds.; Homo sapiens family with sequence similarity 103, member A1, mRNA (cDNA clone MGC:18029 IMAGE:3924570), complete cds.; Homo sapiens family with sequence similarity 103, member A1, mRNA (cDNA clone MGC:102778 IMAGE:5578103), complete cds. |
| 0,93 | RTEL1;<br>TNFRSF6B;<br>RTEL1-<br>TNFRSF6B | regulator of telomere elongation helicase 1; tumor necrosis factor receptor superfamily, member 6b, decoy; RTEL1-TNFRSF6B readthrough (NMD candidate)                                                                                                                                                                                                               |
| 0,93 | FAM101A                                   | family with sequence similarity 101, member A                                                                                                                                                                                                                                                                                                                       |
| 0,93 | MRPL33                                    | mitochondrial ribosomal protein L33                                                                                                                                                                                                                                                                                                                                 |
| 0,93 | GLRA3                                     | glycine receptor alpha 3                                                                                                                                                                                                                                                                                                                                            |
| 0,93 | BAZ1A                                     | bromodomain adjacent to zinc finger domain 1A                                                                                                                                                                                                                                                                                                                       |
| 0,93 | LINC00346                                 | long intergenic non-protein coding RNA 346                                                                                                                                                                                                                                                                                                                          |

|      |              |                                                                                          |
|------|--------------|------------------------------------------------------------------------------------------|
| 0,93 | ZNF22        | zinc finger protein 22                                                                   |
| 0,93 | DPY19L1      | dpy-19-like 1 (C. elegans)                                                               |
| 0,93 | SCCPDH       | saccharopine dehydrogenase (putative)                                                    |
| 0,93 | FBXO10       | F-box protein 10                                                                         |
| 0,93 | ZMYM2        | zinc finger, MYM-type 2                                                                  |
| 0,93 | ING1         | inhibitor of growth family member 1                                                      |
| 0,93 | TCIRG1       | T-cell, immune regulator 1, ATPase, H <sup>+</sup> transporting, lysosomal V0 subunit A3 |
| 0,93 | SYCN         | syncollin                                                                                |
| 0,93 | RARRES2      | retinoic acid receptor responder (tazarotene induced) 2                                  |
| 0,93 | CCDC13       | coiled-coil domain containing 13                                                         |
| 0,93 | FAM120A      | family with sequence similarity 120A                                                     |
| 0,93 | XIAP         | X-linked inhibitor of apoptosis, E3 ubiquitin protein ligase                             |
| 0,93 | DTWD2        | DTW domain containing 2                                                                  |
| 0,93 | OR1E3        | olfactory receptor, family 1, subfamily E, member 3 (gene/pseudogene)                    |
| 0,93 | DOLK         | dolichol kinase                                                                          |
| 0,93 | TRIM39-RPP21 | TRIM39-RPP21 readthrough                                                                 |
| 0,93 | HOXB-AS3     | HOXB cluster antisense RNA 3                                                             |
| 0,93 | KEAP1        | kelch-like ECH-associated protein 1                                                      |
| 0,93 | PRSS36       | protease, serine 36                                                                      |
| 0,93 | QRICH2       | Jeck2013 ALT_DONOR, coding, INTERNAL, intronic best transcript NM_032134                 |
| 0,93 | KIF27        | kinesin family member 27                                                                 |
| 0,93 | LRRC14       | leucine rich repeat containing 14                                                        |
| 0,93 | TAOK3        | TAO kinase 3                                                                             |
| 0,93 | CPXCR1       | CPX chromosome region, candidate 1                                                       |
| 0,93 | GLT8D2       | glycosyltransferase 8 domain containing 2                                                |
| 0,93 | CYB561D2     | cytochrome b561 family, member D2                                                        |
| 0,93 | MEGF10       | multiple EGF-like-domains 10                                                             |
| 0,93 | NAA35        | N(alpha)-acetyltransferase 35, NatC auxiliary subunit                                    |
| 0,93 | EPB41L4A     | erythrocyte membrane protein band 4.1 like 4A                                            |
| 0,93 | MLLT6        | myeloid/lymphoid or mixed-lineage leukemia; translocated to, 6                           |
| 0,93 | SLC17A7      | solute carrier family 17 (vesicular glutamate transporter), member 7                     |
| 0,93 | TRIM28       | tripartite motif containing 28                                                           |
| 0,93 | LSM5         | LSM5 homolog, U6 small nuclear RNA and mRNA degradation associated                       |
| 0,93 | DPP7         | dipeptidyl-peptidase 7                                                                   |
| 0,93 | P2RY1        | purinergic receptor P2Y, G-protein coupled, 1                                            |
| 0,93 | ACVR2B       | activin A receptor type IIB                                                              |
| 0,93 | EXOC3        | exocyst complex component 3                                                              |
| 0,93 | CNNM2        | cyclin and CBS domain divalent metal cation transport mediator 2                         |
| 0,93 | AK4          | adenylate kinase 4                                                                       |
| 0,93 | KCNK6        | potassium channel, two pore domain subfamily K, member 6                                 |

|      |                    |                                                                                                |
|------|--------------------|------------------------------------------------------------------------------------------------|
| 0,93 | ZNF341             | zinc finger protein 341                                                                        |
| 0,93 | MATK               | megakaryocyte-associated tyrosine kinase                                                       |
| 0,93 | ATP5C1             | ATP synthase, H <sup>+</sup> transporting, mitochondrial F1 complex, gamma polypeptide 1       |
| 0,93 | FBXO4              | F-box protein 4                                                                                |
| 0,93 | ZMYND19            | zinc finger, MYND-type containing 19                                                           |
| 0,93 | IFIT5              | interferon-induced protein with tetratricopeptide repeats 5                                    |
| 0,93 | LYPLAL1            | lysophospholipase-like 1                                                                       |
| 0,93 | MYNN               | myoneurin                                                                                      |
| 0,93 | ESCO1              | establishment of sister chromatid cohesion N-acetyltransferase 1                               |
| 0,93 | RRAGA              | Ras-related GTP binding A                                                                      |
| 0,93 | DCTN4              | dynactin 4 (p62)                                                                               |
| 0,93 | GNRHR              | gonadotropin releasing hormone receptor                                                        |
| 0,93 | FRMPD3-AS1         | FRMPD3 antisense RNA 1                                                                         |
| 0,93 | LSS                | lanosterol synthase (2,3-oxidosqualene-lanosterol cyclase)                                     |
| 0,93 | NUSAP1             | nucleolar and spindle associated protein 1                                                     |
| 0,93 | NTMT1              | N-terminal Xaa-Pro-Lys N-methyltransferase 1                                                   |
| 0,93 | ZNF222             | zinc finger protein 222                                                                        |
| 0,93 | MARC2              | mitochondrial amidoxime reducing component 2                                                   |
| 0,93 | TEX9               | testis expressed 9                                                                             |
| 0,93 | SPATS2             | spermatogenesis associated, serine-rich 2                                                      |
| 0,93 | KBTD6              | kelch repeat and BTB (POZ) domain containing 6                                                 |
| 0,93 | ZNF107;<br>MIR6839 | zinc finger protein 107; microRNA 6839                                                         |
| 0,93 | RFC5               | replication factor C subunit 5                                                                 |
| 0,93 | CIDEB              | cell death-inducing DFFA-like effector b                                                       |
| 0,93 | MMP17              | matrix metalloproteinase 17 (membrane-inserted)                                                |
| 0,93 | USH1G              | Usher syndrome 1G (autosomal recessive)                                                        |
| 0,93 | CSTA               | cystatin A (stefin A)                                                                          |
| 0,93 | GUSB               | glucuronidase, beta                                                                            |
| 0,93 | VSIG2              | V-set and immunoglobulin domain containing 2                                                   |
| 0,93 | OR1K1              | olfactory receptor, family 1, subfamily K, member 1                                            |
| 0,93 | EIF3G              | eukaryotic translation initiation factor 3, subunit G                                          |
| 0,93 | DDX23              | DEAD (Asp-Glu-Ala-Asp) box polypeptide 23                                                      |
| 0,93 | WBP1               | WW domain binding protein 1                                                                    |
| 0,93 | MOB3B              | MOB kinase activator 3B                                                                        |
| 0,93 | RDM1               | RAD52 motif containing 1                                                                       |
| 0,93 | C6orf136           | chromosome 6 open reading frame 136                                                            |
| 0,93 | TMEM204            | transmembrane protein 204                                                                      |
| 0,93 | HIST1H2BE          | Memczak2013 ANTISENSE, CDS, coding, upstream_start, UTR3, UTR5 best transcript NM_003523       |
| 0,93 | POLD1              | polymerase (DNA directed), delta 1, catalytic subunit                                          |
| 0,93 | NEDD4              | neural precursor cell expressed, developmentally down-regulated 4, E3 ubiquitin protein ligase |
| 0,93 | OR10Q1             | olfactory receptor, family 10, subfamily Q, member 1                                           |
| 0,93 | RBX1               | ring-box 1, E3 ubiquitin protein ligase                                                        |

|      |                          |                                                                                                                                                                                                                                                                                                                                                                               |
|------|--------------------------|-------------------------------------------------------------------------------------------------------------------------------------------------------------------------------------------------------------------------------------------------------------------------------------------------------------------------------------------------------------------------------|
| 0,93 | PAG1                     | phosphoprotein membrane anchor with glycosphingolipid microdomains 1                                                                                                                                                                                                                                                                                                          |
| 0,93 | DRC3                     | dynein regulatory complex subunit 3                                                                                                                                                                                                                                                                                                                                           |
| 0,93 | LCN12                    | lipocalin 12                                                                                                                                                                                                                                                                                                                                                                  |
| 0,93 | PHC2; MIR3605            | polyhomeotic homolog 2 (Drosophila); microRNA 3605                                                                                                                                                                                                                                                                                                                            |
| 0,93 | PTDSS1                   | Memczak2013 ANTISENSE, coding, INTERNAL, intronic best transcript NM_014754                                                                                                                                                                                                                                                                                                   |
| 0,93 | ASIC3                    | acid sensing ion channel 3                                                                                                                                                                                                                                                                                                                                                    |
| 0,93 | CTDSPL2                  | CTD small phosphatase like 2                                                                                                                                                                                                                                                                                                                                                  |
| 0,93 | CHI3L1                   | chitinase 3-like 1 (cartilage glycoprotein-39)                                                                                                                                                                                                                                                                                                                                |
| 0,93 | RAD54L2                  | RAD54-like 2 (S. cerevisiae)                                                                                                                                                                                                                                                                                                                                                  |
| 0,93 | INTS5                    | integrator complex subunit 5                                                                                                                                                                                                                                                                                                                                                  |
| 0,93 | NDUFB6                   | NADH dehydrogenase (ubiquinone) 1 beta subcomplex, 6, 17kDa                                                                                                                                                                                                                                                                                                                   |
| 0,93 | KRTAP2-2                 | keratin associated protein 2-2                                                                                                                                                                                                                                                                                                                                                |
| 0,93 | GAL3ST4                  | galactose-3-O-sulfotransferase 4                                                                                                                                                                                                                                                                                                                                              |
| 0,93 | ARMCX3                   | armadillo repeat containing, X-linked 3                                                                                                                                                                                                                                                                                                                                       |
| 0,93 | PDE4B                    | phosphodiesterase 4B, cAMP-specific                                                                                                                                                                                                                                                                                                                                           |
| 0,93 | C15orf54                 | chromosome 15 open reading frame 54                                                                                                                                                                                                                                                                                                                                           |
| 0,93 | PRLHR                    | prolactin releasing hormone receptor                                                                                                                                                                                                                                                                                                                                          |
| 0,93 | AGRP                     | agouti related neuropeptide                                                                                                                                                                                                                                                                                                                                                   |
| 0,93 | ANKS1A                   | ankyrin repeat and sterile alpha motif domain containing 1A                                                                                                                                                                                                                                                                                                                   |
| 0,93 | ACIN1                    | Transcript Identified by AceView, Entrez Gene ID(s) 22985                                                                                                                                                                                                                                                                                                                     |
| 0,93 | SERPINB3                 | serpin peptidase inhibitor, clade B (ovalbumin), member 3                                                                                                                                                                                                                                                                                                                     |
| 0,93 | PRB2                     | proline-rich protein BstNI subfamily 2                                                                                                                                                                                                                                                                                                                                        |
| 0,93 | MGAM2                    | maltase-glucoamylase 2 (putative)                                                                                                                                                                                                                                                                                                                                             |
| 0,93 | ZNRD1                    | zinc ribbon domain containing 1                                                                                                                                                                                                                                                                                                                                               |
| 0,93 | MAPK1                    | mitogen-activated protein kinase 1                                                                                                                                                                                                                                                                                                                                            |
| 0,93 | KLHL41                   | kelch-like family member 41                                                                                                                                                                                                                                                                                                                                                   |
| 0,93 | FAM57B                   | family with sequence similarity 57, member B                                                                                                                                                                                                                                                                                                                                  |
| 0,93 | DCHS2                    | dachsous cadherin-related 2                                                                                                                                                                                                                                                                                                                                                   |
| 0,93 | ZNF607                   | zinc finger protein 607                                                                                                                                                                                                                                                                                                                                                       |
| 0,93 | H3F3AP4;<br>H3F3A; H3F3B | Homo sapiens H3 histone, family 3A, pseudogene 4 (H3F3AP4), non-coding RNA.; Homo sapiens H3 histone, family 3A, mRNA (cDNA clone MGC:47761 IMAGE:6014954), complete cds.; Homo sapiens H3 histone, family 3B (H3.3B), mRNA (cDNA clone MGC:87782 IMAGE:3884607), complete cds.; Homo sapiens H3 histone, family 3A, mRNA (cDNA clone MGC:87783 IMAGE:5162817), complete cds. |
| 0,93 | RPL31                    | ribosomal protein L31                                                                                                                                                                                                                                                                                                                                                         |
| 0,93 | RPS6KA1                  | ribosomal protein S6 kinase, 90kDa, polypeptide 1                                                                                                                                                                                                                                                                                                                             |
| 0,93 | DUSP16                   | dual specificity phosphatase 16                                                                                                                                                                                                                                                                                                                                               |
| 0,93 | RNF40                    | ring finger protein 40, E3 ubiquitin protein ligase                                                                                                                                                                                                                                                                                                                           |
| 0,93 | DONSON;<br>CRYZL1        | downstream neighbor of SON; crystallin zeta like 1                                                                                                                                                                                                                                                                                                                            |

|      |                   |                                                                                                             |
|------|-------------------|-------------------------------------------------------------------------------------------------------------|
| 0,93 | SUPT6H            | SPT6 homolog, histone chaperone                                                                             |
| 0,93 | CCM2              | cerebral cavernous malformation 2                                                                           |
| 0,93 | OR10AC1           | olfactory receptor, family 10, subfamily AC, member 1 (gene/pseudogene) [Source:HGNC Symbol;Acc:HGNC:14758] |
| 0,93 | UBL4A             | ubiquitin-like 4A                                                                                           |
| 0,93 | MFSD8             | major facilitator superfamily domain containing 8                                                           |
| 0,93 | C4orf27           | chromosome 4 open reading frame 27                                                                          |
| 0,93 | XAGE1E;<br>XAGE1B | X antigen family, member 1E; X antigen family, member 1B                                                    |
| 0,93 | MS4A6A            | membrane-spanning 4-domains, subfamily A, member 6A                                                         |
| 0,93 | VRK1              | vaccinia related kinase 1                                                                                   |
| 0,93 | APBB3; MIR6831    | amyloid beta (A4) precursor protein-binding, family B, member 3; microRNA 6831                              |
| 0,93 | SMPD3             | sphingomyelin phosphodiesterase 3, neutral membrane (neutral sphingomyelinase II)                           |
| 0,93 | CDK18             | cyclin-dependent kinase 18                                                                                  |
| 0,93 | FUNDC1            | FUN14 domain containing 1                                                                                   |
| 0,93 | FIZ1              | FLT3-interacting zinc finger 1                                                                              |
| 0,93 | SERHL             | serine hydrolase-like (pseudogene)                                                                          |
| 0,93 | ARL15             | ADP-ribosylation factor like GTPase 15                                                                      |
| 0,93 | LIMK2             | LIM domain kinase 2                                                                                         |
| 0,93 | GNA14             | guanine nucleotide binding protein (G protein), alpha 14                                                    |
| 0,93 | STX5              | syntaxin 5                                                                                                  |
| 0,93 | GAA               | glucosidase, alpha; acid                                                                                    |
| 0,93 | TRIM49            | tripartite motif containing 49                                                                              |
| 0,93 | OR9G4             | olfactory receptor, family 9, subfamily G, member 4                                                         |
| 0,93 | CXCL5             | chemokine (C-X-C motif) ligand 5                                                                            |
| 0,93 | KDM5C             | lysine (K)-specific demethylase 5C                                                                          |
| 0,93 | EMB               | embigin                                                                                                     |
| 0,93 | TFEB              | transcription factor EB                                                                                     |
| 0,93 | PRTFDC1           | phosphoribosyl transferase domain containing 1                                                              |
| 0,93 | TST               | thiosulfate sulfurtransferase (rhodanese)                                                                   |
| 0,93 | ADIG              | adipogenin                                                                                                  |
| 0,93 | ARHGAP17          | Rho GTPase activating protein 17                                                                            |
| 0,93 | NDUFB5            | NADH dehydrogenase (ubiquinone) 1 beta subcomplex, 5, 16kDa                                                 |
| 0,93 | PGBD2             | piggyBac transposable element derived 2                                                                     |
| 0,93 | CD5               | CD5 molecule                                                                                                |
| 0,93 | ZNF622            | zinc finger protein 622                                                                                     |
| 0,93 | RBBP9             | retinoblastoma binding protein 9                                                                            |
| 0,93 | PCBP1             | poly(rC) binding protein 1                                                                                  |
| 0,93 | IFNL2             | interferon, lambda 2                                                                                        |
| 0,93 | FBXL14            | F-box and leucine-rich repeat protein 14                                                                    |
| 0,93 | TANK              | TRAF family member-associated NFkB activator                                                                |
| 0,93 | OTULIN            | OTU deubiquitinase with linear linkage specificity                                                          |
| 0,93 | ATG10             | autophagy related 10                                                                                        |
| 0,93 | C8orf34           | chromosome 8 open reading frame 34                                                                          |

|      |                              |                                                                                                                                          |
|------|------------------------------|------------------------------------------------------------------------------------------------------------------------------------------|
| 0,93 | FAM83E                       | family with sequence similarity 83, member E                                                                                             |
| 0,93 | SYMPK                        | symplekin                                                                                                                                |
| 0,93 | AP1S1                        | adaptor-related protein complex 1 sigma 1 subunit                                                                                        |
| 0,93 | TRAPPC4                      | trafficking protein particle complex 4                                                                                                   |
| 0,93 | CHD8                         | chromodomain helicase DNA binding protein 8                                                                                              |
| 0,93 | LENEP                        | lens epithelial protein                                                                                                                  |
| 0,93 | NCCRP1                       | non-specific cytotoxic cell receptor protein 1 homolog (zebrafish)                                                                       |
| 0,93 | NACC2                        | NACC family member 2, BEN and BTB (POZ) domain containing                                                                                |
| 0,93 | IFNW1                        | interferon, omega 1                                                                                                                      |
| 0,93 | MYCT1                        | myc target 1                                                                                                                             |
| 0,93 | RNF25                        | ring finger protein 25                                                                                                                   |
| 0,93 | IMPG2                        | interphotoreceptor matrix proteoglycan 2                                                                                                 |
| 0,93 | EIF3F                        | Eukaryotic translation initiation factor 3 subunit F [Source:UniProtKB/Swiss-Prot;Acc:O00303]                                            |
| 0,93 | MLLT4                        | myeloid/lymphoid or mixed-lineage leukemia; translocated to, 4                                                                           |
| 0,93 | KRT40                        | keratin 40, type I                                                                                                                       |
| 0,93 | CT47A7;<br>CT47A5;<br>CT47A6 | cancer/testis antigen family 47, member A7;<br>cancer/testis antigen family 47, member A5;<br>cancer/testis antigen family 47, member A6 |
| 0,93 | ENDOV                        | endonuclease V                                                                                                                           |
| 0,93 | IP6K3                        | inositol hexakisphosphate kinase 3                                                                                                       |
| 0,93 | HPS1; MIR4685                | Hermansky-Pudlak syndrome 1; microRNA 4685                                                                                               |
| 0,93 | KRTAP4-1                     | keratin associated protein 4-1                                                                                                           |
| 0,93 | LIN28A                       | lin-28 homolog A (C. elegans)                                                                                                            |
| 0,93 | RIF1                         | replication timing regulatory factor 1                                                                                                   |
| 0,93 | CLASRP                       | CLK4-associating serine/arginine rich protein                                                                                            |
| 0,93 | AR                           | androgen receptor                                                                                                                        |
| 0,93 | TNFAIP1                      | tumor necrosis factor, alpha-induced protein 1 (endothelial)                                                                             |
| 0,93 | GANAB                        | glucosidase, alpha; neutral AB                                                                                                           |
| 0,93 | NPPB                         | natriuretic peptide B                                                                                                                    |
| 0,93 | TMEM45A                      | transmembrane protein 45A                                                                                                                |
| 0,93 | ENPP5                        | ectonucleotide pyrophosphatase/phosphodiesterase 5 (putative)                                                                            |
| 0,93 | ARHGAP22                     | Rho GTPase activating protein 22                                                                                                         |
| 0,93 | FGF4                         | fibroblast growth factor 4                                                                                                               |
| 0,93 | FAM132B                      | family with sequence similarity 132, member B                                                                                            |
| 0,93 | ZGLP1                        | zinc finger, GATA-like protein 1                                                                                                         |
| 0,93 | CCNG2                        | cyclin G2                                                                                                                                |
| 0,93 | ADAMTS3                      | ADAM metalloproteinase with thrombospondin type 1 motif 3                                                                                |
| 0,93 | LYST                         | lysosomal trafficking regulator                                                                                                          |
| 0,93 | SV2B                         | synaptic vesicle glycoprotein 2B                                                                                                         |
| 0,93 | COPZ2                        | coatamer protein complex subunit zeta 2                                                                                                  |
| 0,93 | TDRD15                       | tudor domain containing 15                                                                                                               |
| 0,93 | HMG20A                       | high mobility group 20A                                                                                                                  |
| 0,93 | TACC1                        | transforming, acidic coiled-coil containing protein 1                                                                                    |

|      |                             |                                                                                            |
|------|-----------------------------|--------------------------------------------------------------------------------------------|
| 0,93 | PDZD8                       | PDZ domain containing 8                                                                    |
| 0,93 | AP4E1                       | adaptor-related protein complex 4, epsilon 1 subunit                                       |
| 0,93 | KIF6                        | kinesin family member 6                                                                    |
| 0,93 | MANSC4                      | MANSC domain containing 4                                                                  |
| 0,93 | GLRX                        | glutaredoxin                                                                               |
| 0,93 | UBC                         | ubiquitin C                                                                                |
| 0,93 | PHF20                       | PHD finger protein 20                                                                      |
| 0,93 | NSMCE2                      | NSE2/MMS21 homolog, SMC5-SMC6 complex SUMO ligase                                          |
| 0,93 | GRIK1-AS2;<br>BACH1         | GRIK1 antisense RNA 2; BTB and CNC homology 1, basic leucine zipper transcription factor 1 |
| 0,93 | KNDC1                       | kinase non-catalytic C-lobe domain (KIND) containing 1                                     |
| 0,93 | TRIM26                      | tripartite motif containing 26                                                             |
| 0,93 | PCDH12                      | protocadherin 12                                                                           |
| 0,93 | GNAT1                       | guanine nucleotide binding protein (G protein), alpha transducing activity polypeptide 1   |
| 0,93 | PDK1                        | pyruvate dehydrogenase kinase, isozyme 1                                                   |
| 0,93 | CFDP1                       | craniofacial development protein 1                                                         |
| 0,93 | METTL12;<br>SNORA57         | methyltransferase like 12; small nucleolar RNA, H/ACA box 57                               |
| 0,93 | TUSC3                       | tumor suppressor candidate 3                                                               |
| 0,93 | CBX4                        | chromobox homolog 4                                                                        |
| 0,93 | SEC22A                      | SEC22 homolog A, vesicle trafficking protein                                               |
| 0,93 | CMA1                        | chymase 1, mast cell                                                                       |
| 0,93 | IKZF4                       | IKAROS family zinc finger 4                                                                |
| 0,93 | SCAP                        | SREBF chaperone                                                                            |
| 0,93 | LOC728485;<br>CTD-2162K18.4 | uncharacterized LOC728485; novel transcript                                                |
| 0,93 | SLC22A25                    | solute carrier family 22, member 25                                                        |
| 0,93 | RNF26                       | ring finger protein 26                                                                     |
| 0,93 | C17orf80                    | chromosome 17 open reading frame 80                                                        |
| 0,93 | RBMS1                       | Jeck2013 ALT_ACCEPTOR, ALT_DONOR, coding, INTERNAL, intronic best transcript NM_016836     |
| 0,93 | LMTK2                       | lemur tyrosine kinase 2                                                                    |
| 0,93 | CHPT1                       | choline phosphotransferase 1                                                               |
| 0,93 | C12orf54                    | chromosome 12 open reading frame 54                                                        |
| 0,93 | STXBP1                      | syntaxin binding protein 1                                                                 |
| 0,93 | DEFB105A                    | defensin, beta 105A                                                                        |
| 0,93 | ARHGEF40                    | Rho guanine nucleotide exchange factor (GEF) 40                                            |
| 0,93 | NDUFA4                      | NDUFA4, mitochondrial complex associated                                                   |
| 0,93 | CLRN3                       | clarin 3                                                                                   |
| 0,93 | PPP1R1A                     | protein phosphatase 1, regulatory (inhibitor) subunit 1A                                   |
| 0,93 | CLTB                        | clathrin, light chain B                                                                    |
| 0,93 | TMEM80                      | transmembrane protein 80                                                                   |
| 0,93 | CKAP4                       | cytoskeleton-associated protein 4                                                          |
| 0,93 | ADCY1                       | adenylate cyclase 1 (brain)                                                                |
| 0,93 | SPCS2                       | signal peptidase complex subunit 2                                                         |
| 0,93 | OXCT2                       | 3-oxoacid CoA-transferase 2                                                                |

|      |                              |                                                                                               |
|------|------------------------------|-----------------------------------------------------------------------------------------------|
| 0,93 | SURF4                        | surfeit 4                                                                                     |
| 0,93 | PPP1R27                      | protein phosphatase 1, regulatory subunit 27                                                  |
| 0,93 | USP17L19                     | ubiquitin specific peptidase 17-like family member 19                                         |
| 0,93 | ZNF516                       | zinc finger protein 516                                                                       |
| 0,93 | MLXIP                        | MLX interacting protein                                                                       |
| 0,93 | KIF7                         | Memczak2013 ANTISENSE, CDS, coding, INTERNAL best transcript NM_198525                        |
| 0,93 | PSMB8                        | proteasome subunit beta 8                                                                     |
| 0,93 | EVX2                         | even-skipped homeobox 2                                                                       |
| 0,93 | CA6                          | carbonic anhydrase VI                                                                         |
| 0,93 | ATG9B                        | autophagy related 9B                                                                          |
| 0,93 | C9orf62                      | chromosome 9 open reading frame 62                                                            |
| 0,93 | ANAPC11                      | anaphase promoting complex subunit 11                                                         |
| 0,93 | NELL2                        | neural EGFL like 2                                                                            |
| 0,93 | DEFB104A;<br>DEFB104B        | defensin, beta 104A; defensin, beta 104B                                                      |
| 0,93 | UBAP1                        | ubiquitin associated protein 1                                                                |
| 0,93 | ZNF773                       | zinc finger protein 773                                                                       |
| 0,93 | SON; MIR6501                 | SON DNA binding protein; microRNA 6501                                                        |
| 0,93 | DGKD                         | diacylglycerol kinase, delta 130kDa                                                           |
| 0,93 | OR10H4                       | olfactory receptor, family 10, subfamily H, member 4                                          |
| 0,93 | INF2                         | inverted formin, FH2 and WH2 domain containing                                                |
| 0,93 | RFX7                         | regulatory factor X, 7                                                                        |
| 0,93 | DGKE                         | diacylglycerol kinase, epsilon 64kDa                                                          |
| 0,93 | TBCEL                        | tubulin folding cofactor E-like                                                               |
| 0,93 | HMGB2                        | high mobility group box 2                                                                     |
| 0,93 | CENPB                        | centromere protein B                                                                          |
| 0,93 | MAN1A2                       | mannosidase, alpha, class 1A, member 2                                                        |
| 0,93 | LLGL2                        | lethal giant larvae homolog 2 (Drosophila)                                                    |
| 0,93 | XKR3                         | X-linked Kx blood group related 3                                                             |
| 0,93 | LRRIQ3                       | leucine-rich repeats and IQ motif containing 3                                                |
| 0,93 | TSC22D1                      | TSC22 domain family, member 1                                                                 |
| 0,93 | GATAD2B                      | GATA zinc finger domain containing 2B                                                         |
| 0,93 | APITD1-CORT;<br>CORT; APITD1 | APITD1-CORT readthrough; cortistatin; apoptosis-inducing, TAF9-like domain 1                  |
| 0,93 | GYPC                         | Memczak2013 ANTISENSE, coding, INTERNAL, UTR3 best transcript NM_016815                       |
| 0,93 | LRGUK                        | leucine-rich repeats and guanylate kinase domain containing                                   |
| 0,93 | NKTR                         | natural killer cell triggering receptor                                                       |
| 0,93 | IGSF6                        | immunoglobulin superfamily, member 6                                                          |
| 0,93 | GRINA                        | glutamate receptor, ionotropic, N-methyl D-aspartate-associated protein 1 (glutamate binding) |
| 0,93 | ZBED4                        | zinc finger, BED-type containing 4                                                            |
| 0,93 | MAGEB18                      | MAGE family member B18                                                                        |
| 0,93 | HHAT                         | hedgehog acyltransferase                                                                      |
| 0,93 | C1orf167                     | chromosome 1 open reading frame 167                                                           |
| 0,93 | GREB1L                       | growth regulation by estrogen in breast cancer-like                                           |

|      |                                     |                                                                                                                                                                                                        |
|------|-------------------------------------|--------------------------------------------------------------------------------------------------------------------------------------------------------------------------------------------------------|
| 0,93 | NINL                                | Zhang2013 ALT_ACCEPTOR, ALT_DONOR, coding, INTERNAL, intronic best transcript NM_025176                                                                                                                |
| 0,93 | GTPBP2                              | GTP binding protein 2                                                                                                                                                                                  |
| 0,93 | PTCHD2                              | patched domain containing 2                                                                                                                                                                            |
| 0,93 | KIAA1549                            | KIAA1549                                                                                                                                                                                               |
| 0,93 | ST8SIA1                             | ST8 alpha-N-acetyl-neuraminide alpha-2,8-sialyltransferase 1                                                                                                                                           |
| 0,93 | TOR1AIP2                            | torsin A interacting protein 2                                                                                                                                                                         |
| 0,93 | SSC5D                               | scavenger receptor cysteine rich family, 5 domains                                                                                                                                                     |
| 0,93 | JCHAIN                              | joining chain of multimeric IgA and IgM                                                                                                                                                                |
| 0,93 | MROH6                               | maestro heat-like repeat family member 6                                                                                                                                                               |
| 0,93 | DCLK1                               | doublecortin-like kinase 1                                                                                                                                                                             |
| 0,93 | HOXB6                               | homeobox B6                                                                                                                                                                                            |
| 0,93 | ANKFY1                              | ankyrin repeat and FYVE domain containing 1                                                                                                                                                            |
| 0,93 | CELF5                               | CUGBP, Elav-like family member 5                                                                                                                                                                       |
| 0,93 | BEGAIN                              | brain-enriched guanylate kinase-associated                                                                                                                                                             |
| 0,93 | ZRANB3                              | zinc finger, RAN-binding domain containing 3                                                                                                                                                           |
| 0,93 | SOWAHA                              | soosondowah ankyrin repeat domain family member A                                                                                                                                                      |
| 0,93 | BRAF                                | B-Raf proto-oncogene, serine/threonine kinase                                                                                                                                                          |
| 0,93 | ARFRP1                              | ADP-ribosylation factor related protein 1                                                                                                                                                              |
| 0,93 | UPRT                                | uracil phosphoribosyltransferase (FUR1) homolog (S. cerevisiae)                                                                                                                                        |
| 0,93 | ZNF705A;<br>FAM66C                  | zinc finger protein 705A; family with sequence similarity 66, member C                                                                                                                                 |
| 0,93 | TAS1R1                              | taste receptor, type 1, member 1                                                                                                                                                                       |
| 0,93 | ADAMTS16                            | ADAM metalloproteinase with thrombospondin type 1 motif 16                                                                                                                                             |
| 0,93 | SDC1                                | syndecan 1                                                                                                                                                                                             |
| 0,93 | ERBB4                               | erb-b2 receptor tyrosine kinase 4                                                                                                                                                                      |
| 0,93 | COX7A2                              | cytochrome c oxidase subunit VIIa polypeptide 2 (liver)                                                                                                                                                |
| 0,93 | ATP13A2                             | ATPase type 13A2                                                                                                                                                                                       |
| 0,93 | TISP43;<br>LOC646743;<br>AC013269.5 | uncharacterized LOC150527; uncharacterized LOC646743; Transcript Identified by AceView, Entrez Gene ID(s) 646743, RefSeq ID(s) NR_033930; Uncharacterized protein [Source:UniProtKB/TrEMBL;Acc:B9A039] |
| 0,93 | USP17L23                            | ubiquitin specific peptidase 17-like family member 23 [Source:HGNC Symbol;Acc:HGNC:44451]                                                                                                              |
| 0,93 | FNIP1                               | folliculin interacting protein 1                                                                                                                                                                       |
| 0,93 | OR6C76                              | olfactory receptor, family 6, subfamily C, member 76                                                                                                                                                   |
| 0,93 | GPR63                               | G protein-coupled receptor 63                                                                                                                                                                          |
| 0,93 | UROD                                | uroporphyrinogen decarboxylase                                                                                                                                                                         |
| 0,93 | KCNE4                               | potassium channel, voltage gated subfamily E regulatory beta subunit 4                                                                                                                                 |
| 0,93 | HIST1H2BJ                           | histone cluster 1, H2bj                                                                                                                                                                                |
| 0,93 | PKP1                                | plakophilin 1                                                                                                                                                                                          |
| 0,93 | FFAR2                               | free fatty acid receptor 2                                                                                                                                                                             |
| 0,93 | GIPC1                               | GIPC PDZ domain containing family, member 1                                                                                                                                                            |

|      |                |                                                                                   |
|------|----------------|-----------------------------------------------------------------------------------|
| 0,93 | ZNF689         | zinc finger protein 689                                                           |
| 0,93 | CENPA          | centromere protein A                                                              |
| 0,93 | SNX12          | sorting nexin 12                                                                  |
| 0,93 | TERF2IP        | telomeric repeat binding factor 2, interacting protein                            |
| 0,93 | NOS1AP         | nitric oxide synthase 1 (neuronal) adaptor protein                                |
| 0,93 | MAP1LC3A       | microtubule-associated protein 1 light chain 3 alpha                              |
| 0,93 | SMPDL3A        | sphingomyelin phosphodiesterase, acid-like 3A                                     |
| 0,93 | ANKEF1         | ankyrin repeat and EF-hand domain containing 1                                    |
| 0,93 | ZNF8           | zinc finger protein 8                                                             |
| 0,93 | DLK2           | delta-like 2 homolog (Drosophila)                                                 |
| 0,93 | NDUFA10        | NADH dehydrogenase (ubiquinone) 1 alpha subcomplex, 10, 42kDa                     |
| 0,93 | SCML1          | sex comb on midleg-like 1 (Drosophila)                                            |
| 0,93 | RHPN2          | rhophilin, Rho GTPase binding protein 2                                           |
| 0,93 | CCDC53         | coiled-coil domain containing 53                                                  |
| 0,93 | C16orf46       | chromosome 16 open reading frame 46                                               |
| 0,93 | NPIP4          | nuclear pore complex interacting protein family, member B4                        |
| 0,93 | THEM4          | thioesterase superfamily member 4                                                 |
| 0,93 | GPALPP1        | GPALPP motifs containing 1                                                        |
| 0,93 | PIP5K1C        | phosphatidylinositol-4-phosphate 5-kinase, type I, gamma                          |
| 0,93 | NHEJ1          | nonhomologous end-joining factor 1                                                |
| 0,93 | PPP1R3C        | protein phosphatase 1, regulatory subunit 3C                                      |
| 0,93 | TEAD1          | TEA domain family member 1 (SV40 transcriptional enhancer factor)                 |
| 0,93 | C3orf62        | chromosome 3 open reading frame 62                                                |
| 0,93 | ACOT2          | acyl-CoA thioesterase 2                                                           |
| 0,93 | KRT12          | keratin 12, type I                                                                |
| 0,93 | F2RL3          | coagulation factor II (thrombin) receptor-like 3                                  |
| 0,93 | TUBB1          | tubulin, beta 1 class VI                                                          |
| 0,93 | EFCAB6         | EF-hand calcium binding domain 6                                                  |
| 0,93 | KIF2A          | kinesin heavy chain member 2A                                                     |
| 0,93 | TIAL1          | TIA1 cytotoxic granule-associated RNA binding protein-like 1                      |
| 0,93 | SURF1          | surfeit 1                                                                         |
| 0,93 | TMCC2          | transmembrane and coiled-coil domain family 2                                     |
| 0,93 | AVIL           | advillin                                                                          |
| 0,93 | SND1; SND1-IT1 | staphylococcal nuclease and tudor domain containing 1; SND1 intronic transcript 1 |
| 0,93 | ZSCAN12        | zinc finger and SCAN domain containing 12                                         |
| 0,93 | RPS5           | ribosomal protein S5                                                              |
| 0,93 | LGALS13        | lectin, galactoside-binding, soluble, 13                                          |
| 0,93 | TATDN2; GHRLOS | TatD DNase domain containing 2; ghrelin opposite strand/antisense RNA             |
| 0,93 | KPNB1          | karyopherin (importin) beta 1                                                     |
| 0,93 | RPS3; SNORD15A | ribosomal protein S3; small nucleolar RNA, C/D box 15A                            |
| 0,93 | ST13           | suppression of tumorigenicity 13 (colon carcinoma) (Hsp70 interacting protein)    |

|      |                                |                                                                                                        |
|------|--------------------------------|--------------------------------------------------------------------------------------------------------|
| 0,93 | SGK223                         | homolog of rat pragma of Rnd2; Tyrosine-protein kinase SgK223 [Source:UniProtKB/Swiss-Prot;Acc:Q86YV5] |
| 0,93 | E2F6                           | E2F transcription factor 6                                                                             |
| 0,93 | C19orf12                       | chromosome 19 open reading frame 12                                                                    |
| 0,93 | MPPE1                          | metallophosphoesterase 1                                                                               |
| 0,93 | NPPC                           | natriuretic peptide C                                                                                  |
| 0,93 | TAAR3                          | trace amine associated receptor 3 (gene/pseudogene)                                                    |
| 0,93 | ODF3L2                         | outer dense fiber of sperm tails 3-like 2                                                              |
| 0,93 | TTC39C                         | tetratricopeptide repeat domain 39C                                                                    |
| 0,93 | VPS13C                         | vacuolar protein sorting 13 homolog C (S. cerevisiae)                                                  |
| 0,93 | FAM126B                        | family with sequence similarity 126, member B                                                          |
| 0,93 | LCN2                           | lipocalin 2                                                                                            |
| 0,93 | PDPK1                          | 3-phosphoinositide dependent protein kinase 1                                                          |
| 0,93 | POLE                           | polymerase (DNA directed), epsilon, catalytic subunit                                                  |
| 0,93 | TBC1D13                        | TBC1 domain family, member 13                                                                          |
| 0,93 | PRKCE                          | protein kinase C, epsilon                                                                              |
| 0,93 | PADI6                          | peptidyl arginine deiminase, type VI                                                                   |
| 0,93 | RPAP2                          | RNA polymerase II associated protein 2                                                                 |
| 0,93 | SNN                            | stannin                                                                                                |
| 0,93 | GZMM                           | granzyme M                                                                                             |
| 0,93 | PLSCR1                         | phospholipid scramblase 1                                                                              |
| 0,93 | ARHGAP11B;<br>ARHGAP11A        | Rho GTPase activating protein 11B; Rho GTPase activating protein 11A                                   |
| 0,93 | HCN4                           | hyperpolarization activated cyclic nucleotide gated potassium channel 4                                |
| 0,93 | CTSF                           | cathepsin F                                                                                            |
| 0,93 | YLPM1                          | YLP motif containing 1                                                                                 |
| 0,93 | HSPA12A                        | heat shock 70kDa protein 12A                                                                           |
| 0,93 | POLA1                          | polymerase (DNA directed), alpha 1, catalytic subunit                                                  |
| 0,93 | TENM2                          | teneurin transmembrane protein 2                                                                       |
| 0,93 | SLC39A12                       | solute carrier family 39 (zinc transporter), member 12                                                 |
| 0,93 | WDFY1                          | WD repeat and FYVE domain containing 1                                                                 |
| 0,93 | MFAP1                          | microfibrillar associated protein 1                                                                    |
| 0,93 | IRAK4                          | interleukin 1 receptor associated kinase 4                                                             |
| 0,93 | ZNF501                         | zinc finger protein 501 [Source:HGNC Symbol;Acc:HGNC:23717]                                            |
| 0,93 | C1orf194                       | chromosome 1 open reading frame 194                                                                    |
| 0,93 | FBXO34                         | F-box protein 34                                                                                       |
| 0,93 | SLC16A1                        | solute carrier family 16 (monocarboxylate transporter), member 1                                       |
| 0,93 | UFSP1                          | UFM1-specific peptidase 1 (inactive)                                                                   |
| 0,93 | C6orf203                       | chromosome 6 open reading frame 203                                                                    |
| 0,93 | H2BFM                          | H2B histone family, member M                                                                           |
| 0,93 | LOC100134391;<br>CTD-2532D12.4 | uncharacterized LOC100134391; novel transcript                                                         |
| 0,93 | ADRBK1                         | adrenergic, beta, receptor kinase 1                                                                    |
| 0,93 | PF4V1                          | platelet factor 4 variant 1                                                                            |

|      |                     |                                                                   |
|------|---------------------|-------------------------------------------------------------------|
| 0,93 | TCERG1              | Transcript Identified by AceView, Entrez Gene ID(s)<br>10915      |
| 0,93 | DNLZ                | DNL-type zinc finger                                              |
| 0,93 | MTMR3               | myotubularin related protein 3                                    |
| 0,93 | METTL23             | methyltransferase like 23                                         |
| 0,93 | MAPKAPK2            | mitogen-activated protein kinase-activated protein<br>kinase 2    |
| 0,93 | POLH                | polymerase (DNA directed), eta                                    |
| 0,93 | TBATA               | thymus, brain and testes associated                               |
| 0,93 | INO80D              | INO80 complex subunit D                                           |
| 0,93 | LCE3A               | late cornified envelope 3A                                        |
| 0,93 | DENND4A             | DENN/MADD domain containing 4A                                    |
| 0,93 | ALOX5AP             | arachidonate 5-lipoxygenase-activating protein                    |
| 0,93 | C3orf70             | chromosome 3 open reading frame 70                                |
| 0,93 | GLO1                | glyoxalase I                                                      |
| 0,93 | INPP5D              | inositol polyphosphate-5-phosphatase D                            |
| 0,93 | NAT14               | N-acetyltransferase 14 (GCN5-related, putative)                   |
| 0,93 | SLC25A18            | solute carrier family 25 (glutamate carrier), member 18           |
| 0,93 | MPC1                | mitochondrial pyruvate carrier 1                                  |
| 0,93 | TTL                 | tubulin tyrosine ligase                                           |
| 0,93 | MSL2                | male-specific lethal 2 homolog (Drosophila)                       |
| 0,93 | C6orf106            | chromosome 6 open reading frame 106                               |
| 0,93 | FMOD                | fibromodulin                                                      |
| 0,93 | PLCG1;<br>RPL23AP81 | phospholipase C, gamma 1; ribosomal protein L23a<br>pseudogene 81 |
| 0,93 | POLQ                | polymerase (DNA directed), theta                                  |
| 0,93 | GPR68               | G protein-coupled receptor 68                                     |
| 0,93 | TYRO3               | TYRO3 protein tyrosine kinase                                     |
| 0,93 | FBXO6               | F-box protein 6                                                   |
| 0,93 | SETD5               | SET domain containing 5                                           |
| 0,93 | MAD1L1              | MAD1 mitotic arrest deficient-like 1 (yeast)                      |
| 0,93 | CHD9                | Transcript Identified by AceView, Entrez Gene ID(s)<br>80205      |
| 0,93 | YTHDC1              | YTH domain containing 1                                           |
| 0,93 | KLRAP1              | killer cell lectin-like receptor subfamily A pseudogene<br>1      |
| 0,93 | HSD17B10            | hydroxysteroid (17-beta) dehydrogenase 10                         |
| 0,93 | FLOT2               | flotillin 2                                                       |
| 0,93 | ITGB1BP2            | integrin beta 1 binding protein (melusin) 2                       |
| 0,93 | LLPH                | LLP homolog, long-term synaptic facilitation (Aplysia)            |
| 0,93 | TBL1Y               | transducin (beta)-like 1, Y-linked                                |
| 0,93 | SMIM4               | small integral membrane protein 4                                 |
| 0,93 | CDC37L1             | cell division cycle 37-like 1                                     |
| 0,93 | FKBP10              | FK506 binding protein 10                                          |
| 0,93 | AP3B1               | adaptor-related protein complex 3, beta 1 subunit                 |
| 0,93 | PHLPP1              | PH domain and leucine rich repeat protein phosphatase<br>1        |

|      |                                        |                                                                                                                         |
|------|----------------------------------------|-------------------------------------------------------------------------------------------------------------------------|
| 0,93 | SLC22A3                                | solute carrier family 22 (organic cation transporter), member 3                                                         |
| 0,93 | TYMS                                   | thymidylate synthetase                                                                                                  |
| 0,93 | CSNK1E                                 | casein kinase 1, epsilon                                                                                                |
| 0,93 | SORL1                                  | sortilin-related receptor, L(DLR class) A repeats containing                                                            |
| 0,93 | DDIT4                                  | DNA damage inducible transcript 4                                                                                       |
| 0,93 | NDUFA6                                 | NADH dehydrogenase (ubiquinone) 1 alpha subcomplex, 6, 14kDa                                                            |
| 0,93 | LOC729159;<br>RP11-457D20.2            | UPF0607 protein ENSP00000381418-like; Putative UPF0607 protein ENSP00000381418 [Source:UniProtKB/Swiss-Prot;Acc:A8MU76] |
| 0,93 | PRKAR2B                                | protein kinase, cAMP-dependent, regulatory, type II, beta                                                               |
| 0,93 | PIGC                                   | phosphatidylinositol glycan anchor biosynthesis class C                                                                 |
| 0,93 | LRRC17                                 | leucine rich repeat containing 17                                                                                       |
| 0,93 | RHOJ                                   | ras homolog family member J                                                                                             |
| 0,93 | TMEM237                                | transmembrane protein 237                                                                                               |
| 0,93 | FAM160A1                               | family with sequence similarity 160, member A1                                                                          |
| 0,93 | NDUFA12                                | NADH dehydrogenase (ubiquinone) 1 alpha subcomplex, 12                                                                  |
| 0,93 | NR5A2                                  | nuclear receptor subfamily 5, group A, member 2                                                                         |
| 0,93 | THOC6                                  | THO complex 6                                                                                                           |
| 0,93 | FAM153B                                | family with sequence similarity 153, member B                                                                           |
| 0,93 | FEM1B                                  | fem-1 homolog b (C. elegans)                                                                                            |
| 0,93 | BRI3                                   | brain protein I3                                                                                                        |
| 0,93 | MRI1                                   | methylthioribose-1-phosphate isomerase 1                                                                                |
| 0,93 | LOC643355;<br>RP11-88H9.2;<br>toyfawbu | uncharacterized LOC643355; putative novel transcript; Transcript Identified by AceView                                  |
| 0,93 | LCE1A                                  | late cornified envelope 1A                                                                                              |
| 0,93 | SLFN5                                  | schlafen family member 5                                                                                                |
| 0,93 | C1orf112                               | chromosome 1 open reading frame 112                                                                                     |
| 0,93 | PSAP                                   | prosaposin                                                                                                              |
| 0,93 | H2AFB3                                 | H2A histone family, member B3                                                                                           |
| 0,93 | AAMDC                                  | adipogenesis associated, Mth938 domain containing                                                                       |
| 0,93 | SLC24A3                                | solute carrier family 24 (sodium/potassium/calcium exchanger), member 3                                                 |
| 0,93 | OR1L1                                  | olfactory receptor, family 1, subfamily L, member 1                                                                     |
| 0,93 | GIPC3                                  | GIPC PDZ domain containing family, member 3                                                                             |
| 0,93 | MORC4                                  | MORC family CW-type zinc finger 4                                                                                       |
| 0,93 | PACRG                                  | PARK2 co-regulated                                                                                                      |
| 0,93 | GPR42                                  | G protein-coupled receptor 42 (gene/pseudogene)                                                                         |
| 0,93 | SSC4D                                  | scavenger receptor cysteine rich family, 4 domains                                                                      |
| 0,93 | SMCR8                                  | Smith-Magenis syndrome chromosome region, candidate 8                                                                   |
| 0,93 | ZNF200                                 | Transcript Identified by AceView, Entrez Gene ID(s) 7752                                                                |
| 0,93 | FEZF1                                  | FEZ family zinc finger 1                                                                                                |

|      |                      |                                                                                                                                                      |
|------|----------------------|------------------------------------------------------------------------------------------------------------------------------------------------------|
| 0,93 | SLC12A2              | solute carrier family 12 (sodium/potassium/chloride transporter), member 2                                                                           |
| 0,93 | EPB42                | erythrocyte membrane protein band 4.2                                                                                                                |
| 0,93 | EDEM3                | ER degradation enhancer, mannosidase alpha-like 3                                                                                                    |
| 0,93 | ITLN2                | intelectin 2                                                                                                                                         |
| 0,93 | FUT3                 | fucosyltransferase 3 (galactoside 3(4)-L-fucosyltransferase, Lewis blood group)                                                                      |
| 0,93 | HUS1B                | HUS1 checkpoint clamp component B                                                                                                                    |
| 0,93 | BCL2L10              | BCL2-like 10 (apoptosis facilitator)                                                                                                                 |
| 0,93 | SH2B1                | SH2B adaptor protein 1                                                                                                                               |
| 0,93 | VIPR2                | vasoactive intestinal peptide receptor 2                                                                                                             |
| 0,93 | CCDC183;<br>RABL6    | coiled-coil domain containing 183; RAB, member RAS oncogene family-like 6                                                                            |
| 0,93 | SMYD3                | SET and MYND domain containing 3                                                                                                                     |
| 0,93 | MCHR1                | melanin-concentrating hormone receptor 1                                                                                                             |
| 0,93 | KATNAL1              | katanin p60 subunit A-like 1                                                                                                                         |
| 0,93 | MON1B                | MON1 secretory trafficking family member B                                                                                                           |
| 0,93 | EML3                 | echinoderm microtubule associated protein like 3                                                                                                     |
| 0,93 | ST8SIA4              | ST8 alpha-N-acetyl-neuraminide alpha-2,8-sialyltransferase 4                                                                                         |
| 0,93 | SLC32A1              | solute carrier family 32 (GABA vesicular transporter), member 1                                                                                      |
| 0,93 | MYSM1                | Myb-like, SWIRM and MPN domains 1                                                                                                                    |
| 0,93 | PAK1                 | p21 protein (Cdc42/Rac)-activated kinase 1                                                                                                           |
| 0,93 | ESR2                 | estrogen receptor 2 (ER beta)                                                                                                                        |
| 0,93 | TRAK2                | Jeck2013 ALT_ACCEPTOR, ALT_DONOR, coding, INTERNAL, intronic best transcript NM_015049                                                               |
| 0,93 | MTR                  | 5-methyltetrahydrofolate-homocysteine methyltransferase                                                                                              |
| 0,93 | UBE2QL1              | ubiquitin conjugating enzyme E2Q family-like 1                                                                                                       |
| 0,93 | DYRK1B               | dual specificity tyrosine-(Y)-phosphorylation regulated kinase 1B                                                                                    |
| 0,93 | GSG2                 | germ cell associated 2 (haspin)                                                                                                                      |
| 0,93 | FAM73B               | family with sequence similarity 73, member B                                                                                                         |
| 0,93 | OSBPL3               | oxysterol binding protein-like 3                                                                                                                     |
| 0,93 | SELK                 | selenoprotein K; selenoprotein K<br>[Source:EntrezGene;Acc:58515]; Transcript Identified by AceView, Entrez Gene ID(s) 58515, RefSeq ID(s) NM_021237 |
| 0,93 | IL31                 | interleukin 31                                                                                                                                       |
| 0,93 | ZKSCAN1              | zinc finger with KRAB and SCAN domains 1                                                                                                             |
| 0,93 | CYP4F11              | cytochrome P450, family 4, subfamily F, polypeptide 11                                                                                               |
| 0,93 | TBL1XR1              | transducin (beta)-like 1 X-linked receptor 1                                                                                                         |
| 0,93 | RRAGC                | Memczak2013 ANTISENSE, coding, INTERNAL, intronic best transcript NM_022157                                                                          |
| 0,93 | CCNB2                | cyclin B2                                                                                                                                            |
| 0,93 | KIAA0430;<br>MIR6506 | KIAA0430; microRNA 6506                                                                                                                              |
| 0,93 | WBP4                 | WW domain binding protein 4                                                                                                                          |
| 0,93 | NEURL1               | neuralized E3 ubiquitin protein ligase 1                                                                                                             |

|      |                |                                                                                            |
|------|----------------|--------------------------------------------------------------------------------------------|
| 0,93 | HCAR2          | hydroxycarboxylic acid receptor 2                                                          |
| 0,93 | CCDC22         | coiled-coil domain containing 22                                                           |
| 0,93 | CDC37; MIR1181 | cell division cycle 37; microRNA 1181                                                      |
| 0,93 | IFIT2          | interferon-induced protein with tetratricopeptide repeats 2                                |
| 0,93 | CPD            | carboxypeptidase D                                                                         |
| 0,93 | RPS4Y2         | ribosomal protein S4, Y-linked 2                                                           |
| 0,93 | OR5H6          | olfactory receptor, family 5, subfamily H, member 6 (gene/pseudogene)                      |
| 0,93 | DSCAM          | Down syndrome cell adhesion molecule                                                       |
| 0,93 | WFDC13         | WAP four-disulfide core domain 13                                                          |
| 0,93 | YARS           | Transcript Identified by AceView, Entrez Gene ID(s) 8565                                   |
| 0,93 | EHMT1          | euchromatic histone-lysine N-methyltransferase 1                                           |
| 0,93 | PRR15L         | proline rich 15-like                                                                       |
| 0,93 | UNC45A         | unc-45 myosin chaperone A                                                                  |
| 0,93 | FOXK1          | forkhead box K1                                                                            |
| 0,93 | MMP25          | matrix metalloproteinase 25                                                                |
| 0,93 | RNF103         | ring finger protein 103                                                                    |
| 0,93 | ATP5G3         | ATP synthase, H <sup>+</sup> transporting, mitochondrial Fo complex subunit C3 (subunit 9) |
| 0,93 | FANCD2         | Fanconi anemia complementation group D2                                                    |
| 0,93 | PRTG           | protogenin                                                                                 |
| 0,93 | TBC1D22B       | TBC1 domain family, member 22B                                                             |
| 0,93 | SPDYC          | speedy/RINGO cell cycle regulator family member C                                          |
| 0,93 | EFS            | embryonal Fyn-associated substrate                                                         |
| 0,93 | NYNRIN         | NYN domain and retroviral integrase containing                                             |
| 0,93 | RBM42          | RNA binding motif protein 42                                                               |
| 0,93 | MAPK15         | mitogen-activated protein kinase 15                                                        |
| 0,93 | DLEC1          | deleted in lung and esophageal cancer 1                                                    |
| 0,93 | ACOT13         | acyl-CoA thioesterase 13                                                                   |
| 0,93 | CCDC112        | coiled-coil domain containing 112                                                          |
| 0,93 | KDM6B          | lysine (K)-specific demethylase 6B                                                         |
| 0,93 | PRSS41         | protease, serine 41                                                                        |
| 0,93 | ZNF574         | zinc finger protein 574                                                                    |
| 0,93 | RNASE7         | ribonuclease, RNase A family, 7                                                            |
| 0,93 | PAAF1          | proteasomal ATPase-associated factor 1                                                     |
| 0,93 | TMA7           | translation machinery associated 7 homolog                                                 |
| 0,93 | SDF4           | stromal cell derived factor 4                                                              |
| 0,93 | EAPP           | E2F-associated phosphoprotein                                                              |
| 0,93 | OR7C1          | olfactory receptor, family 7, subfamily C, member 1                                        |
| 0,93 | GAPVD1         | GTPase activating protein and VPS9 domains 1                                               |
| 0,93 | TMEM2          | Transcript Identified by AceView, Entrez Gene ID(s) 23670                                  |
| 0,93 | SNF8           | SNF8, ESCRT-II complex subunit                                                             |
| 0,93 | MRPL27         | mitochondrial ribosomal protein L27                                                        |
| 0,93 | ARRB1          | arrestin, beta 1                                                                           |
| 0,92 | KRT19          | keratin 19, type I                                                                         |
| 0,92 | NCAPG2         | non-SMC condensin II complex subunit G2                                                    |

|      |                        |                                                                                           |
|------|------------------------|-------------------------------------------------------------------------------------------|
| 0,92 | TTC3                   | tetratricopeptide repeat domain 3                                                         |
| 0,92 | NEFL                   | neurofilament, light polypeptide                                                          |
| 0,92 | NDUFA10                | NADH dehydrogenase (ubiquinone) 1 alpha subcomplex, 10, 42kDa                             |
| 0,92 | SELPLG                 | selectin P ligand                                                                         |
| 0,92 | ITPR2                  | inositol 1,4,5-trisphosphate receptor, type 2                                             |
| 0,92 | PMEPA1                 | prostate transmembrane protein, androgen induced 1                                        |
| 0,92 | NDUFA13                | NADH dehydrogenase (ubiquinone) 1 alpha subcomplex, 13                                    |
| 0,92 | ARHGAP5                | Rho GTPase activating protein 5                                                           |
| 0,92 | RC3H2                  | ring finger and CCCH-type domains 2                                                       |
| 0,92 | ECSIT                  | ECSIT signalling integrator                                                               |
| 0,92 | P4HTM                  | prolyl 4-hydroxylase, transmembrane (endoplasmic reticulum)                               |
| 0,92 | RALGAPB                | Ral GTPase activating protein, beta subunit (non-catalytic)                               |
| 0,92 | RPL10A                 | ribosomal protein L10a                                                                    |
| 0,92 | ATP6V1E1               | ATPase, H+ transporting, lysosomal 31kDa, V1 subunit E1                                   |
| 0,92 | RB1                    | retinoblastoma 1                                                                          |
| 0,92 | IL13RA1                | interleukin 13 receptor, alpha 1                                                          |
| 0,92 | FAM13C                 | family with sequence similarity 13, member C                                              |
| 0,92 | FAM117A                | family with sequence similarity 117, member A                                             |
| 0,92 | HDDC3                  | HD domain containing 3                                                                    |
| 0,92 | ZNF266                 | zinc finger protein 266                                                                   |
| 0,92 | LOC55338; CTC-242N15.1 | uncharacterized LOC55338; novel transcript                                                |
| 0,92 | UPP2                   | uridine phosphorylase 2                                                                   |
| 0,92 | SPACA1                 | sperm acrosome associated 1                                                               |
| 0,92 | MSI2                   | Memczak2013 ALT_ACCEPTOR, ALT_DONOR, coding, INTERNAL, intronic best transcript NM_170721 |
| 0,92 | TDRD7                  | tudor domain containing 7                                                                 |
| 0,92 | RGSL1                  | regulator of G-protein signaling like 1                                                   |
| 0,92 | CTLA4                  | cytotoxic T-lymphocyte-associated protein 4                                               |
| 0,92 | UBE2C                  | ubiquitin-conjugating enzyme E2C                                                          |
| 0,92 | LAT                    | linker for activation of T-cells                                                          |
| 0,92 | UNC50                  | unc-50 homolog (C. elegans)                                                               |
| 0,92 | TNKS1BP1               | tankyrase 1 binding protein 1                                                             |
| 0,92 | CD3D                   | CD3d molecule, delta (CD3-TCR complex)                                                    |
| 0,92 | ALG1L2                 | ALG1, chitobiosyldiphosphodolichol beta-mannosyltransferase-like 2                        |
| 0,92 | TRIM64C                | tripartite motif containing 64C                                                           |
| 0,92 | SNX25                  | sorting nexin 25                                                                          |
| 0,92 | PEX11A                 | peroxisomal biogenesis factor 11 alpha                                                    |
| 0,92 | UBXN6                  | UBX domain protein 6                                                                      |
| 0,92 | SMIM20                 | small integral membrane protein 20                                                        |
| 0,92 | NEU1                   | sialidase 1 (lysosomal sialidase)                                                         |
| 0,92 | ADCY4                  | adenylate cyclase 4                                                                       |
| 0,92 | LINC00598              | long intergenic non-protein coding RNA 598                                                |

|      |                                                                         |                                                                                                                                   |
|------|-------------------------------------------------------------------------|-----------------------------------------------------------------------------------------------------------------------------------|
| 0,92 | SLC39A7                                                                 | solute carrier family 39 (zinc transporter), member 7                                                                             |
| 0,92 | PAK4                                                                    | p21 protein (Cdc42/Rac)-activated kinase 4                                                                                        |
| 0,92 | CCDC166                                                                 | coiled-coil domain containing 166                                                                                                 |
| 0,92 | SUGCT                                                                   | succinyl-CoA:glutarate-CoA transferase                                                                                            |
| 0,92 | WIF1                                                                    | WNT inhibitory factor 1                                                                                                           |
| 0,92 | STX19                                                                   | syntaxin 19                                                                                                                       |
| 0,92 | SPDYE1                                                                  | speedy/RINGO cell cycle regulator family member E1                                                                                |
| 0,92 | ALDH16A1                                                                | aldehyde dehydrogenase 16 family, member A1                                                                                       |
| 0,92 | ATRAID                                                                  | all-trans retinoic acid-induced differentiation factor                                                                            |
| 0,92 | GABPA                                                                   | GA binding protein transcription factor alpha subunit                                                                             |
| 0,92 | SOD2                                                                    | superoxide dismutase 2, mitochondrial                                                                                             |
| 0,92 | RNF144A                                                                 | ring finger protein 144A                                                                                                          |
| 0,92 | ZFYVE27                                                                 | zinc finger, FYVE domain containing 27                                                                                            |
| 0,92 | DNAJC21                                                                 | DnaJ (Hsp40) homolog, subfamily C, member 21                                                                                      |
| 0,92 | RAPGEF2                                                                 | Rap guanine nucleotide exchange factor 2                                                                                          |
| 0,92 | WDR59                                                                   | WD repeat domain 59                                                                                                               |
| 0,92 | METTL21A                                                                | methyltransferase like 21A                                                                                                        |
| 0,92 | IFT122                                                                  | intraflagellar transport 122                                                                                                      |
| 0,92 | AP1M1                                                                   | adaptor-related protein complex 1, mu 1 subunit                                                                                   |
| 0,92 | CKAP5;<br>SNORD67                                                       | cytoskeleton associated protein 5; small nucleolar RNA, C/D box 67                                                                |
| 0,92 | ZNF521                                                                  | zinc finger protein 521                                                                                                           |
| 0,92 | AMMECR1L                                                                | AMMECR1 like                                                                                                                      |
| 0,92 | BRPF3                                                                   | bromodomain and PHD finger containing 3                                                                                           |
| 0,92 | GJB3                                                                    | gap junction protein beta 3                                                                                                       |
| 0,92 | SH3BP4                                                                  | SH3-domain binding protein 4                                                                                                      |
| 0,92 | HSPB11                                                                  | heat shock protein family B (small), member 11                                                                                    |
| 0,92 | NUDC                                                                    | nudC nuclear distribution protein                                                                                                 |
| 0,92 | ZNF714;<br>VN1R81P                                                      | zinc finger protein 714; vomeronasal 1 receptor 81 pseudogene                                                                     |
| 0,92 | PCDHB11                                                                 | protocadherin beta 11                                                                                                             |
| 0,92 | PCGF1                                                                   | polycomb group ring finger 1                                                                                                      |
| 0,92 | C11orf57                                                                | chromosome 11 open reading frame 57                                                                                               |
| 0,92 | WIPI2                                                                   | WD repeat domain, phosphoinositide interacting 2                                                                                  |
| 0,92 | ATL3                                                                    | atlastin GTPase 3                                                                                                                 |
| 0,92 | DENND6A                                                                 | DENN/MADD domain containing 6A                                                                                                    |
| 0,92 | FAM219A                                                                 | family with sequence similarity 219, member A                                                                                     |
| 0,92 | ZYG11B                                                                  | zyg-11 family member B, cell cycle regulator                                                                                      |
| 0,92 | TM7SF3                                                                  | transmembrane 7 superfamily member 3                                                                                              |
| 0,92 | DNAJC5;<br>MIR941-1;<br>MIR941-2;<br>MIR941-3;<br>MIR941-4;<br>MIR941-5 | DnaJ (Hsp40) homolog, subfamily C, member 5;<br>microRNA 941-1; microRNA 941-2; microRNA 941-3;<br>microRNA 941-4; microRNA 941-5 |
| 0,92 | ELANE                                                                   | elastase, neutrophil expressed                                                                                                    |
| 0,92 | TKT                                                                     | transketolase                                                                                                                     |
| 0,92 | LINC00552                                                               | long intergenic non-protein coding RNA 552                                                                                        |
| 0,92 | ERICH1                                                                  | glutamate rich 1                                                                                                                  |

|      |                                                    |                                                                                                        |
|------|----------------------------------------------------|--------------------------------------------------------------------------------------------------------|
| 0,92 | CCNJ                                               | cyclin J                                                                                               |
| 0,92 | SRGAP2                                             | SLIT-ROBO Rho GTPase activating protein 2                                                              |
| 0,92 | CCDC187                                            | coiled-coil domain containing 187                                                                      |
| 0,92 | NKX3-2                                             | NK3 homeobox 2                                                                                         |
| 0,92 | CMIP                                               | c-Maf inducing protein                                                                                 |
| 0,92 | LAPTM4A                                            | Memczak2013 ALT_ACCEPTOR, ALT_DONOR, coding, INTERNAL, intronic best transcript NM_014713              |
| 0,92 | PDCD11                                             | programmed cell death 11                                                                               |
| 0,92 | NEIL1                                              | nei-like DNA glycosylase 1                                                                             |
| 0,92 | HYOU1                                              | hypoxia up-regulated 1                                                                                 |
| 0,92 | RALBP1                                             | ralA binding protein 1                                                                                 |
| 0,92 | WRAP73                                             | WD repeat containing, antisense to TP73                                                                |
| 0,92 | PLEKHO1                                            | pleckstrin homology domain containing, family O member 1                                               |
| 0,92 | SPSB1                                              | splA/ryanodine receptor domain and SOCS box containing 1                                               |
| 0,92 | LOC101928436; RP11-153F1.1; RP11-347K2.2; teyfawbu | uncharacterized LOC101928436; novel transcript; Transcript Identified by AceView                       |
| 0,92 | ZNF444                                             | zinc finger protein 444                                                                                |
| 0,92 | SLC1A4                                             | solute carrier family 1 (glutamate/neutral amino acid transporter), member 4                           |
| 0,92 | LRP5L                                              | LDL receptor related protein 5 like                                                                    |
| 0,92 | SERGEF                                             | secretion regulating guanine nucleotide exchange factor                                                |
| 0,92 | NBEAL1                                             | neurobeachin like 1                                                                                    |
| 0,92 | KCNA2                                              | potassium channel, voltage gated shaker related subfamily A, member 2                                  |
| 0,92 | TOPBP1                                             | topoisomerase (DNA) II binding protein 1                                                               |
| 0,92 | LMOD2                                              | leiomodins 2 (cardiac)                                                                                 |
| 0,92 | COMMD4                                             | COMM domain containing 4                                                                               |
| 0,92 | AKR1A1                                             | aldo-keto reductase family 1, member A1 (aldehyde reductase)                                           |
| 0,92 | QKI                                                | QKI, KH domain containing, RNA binding                                                                 |
| 0,92 | ZSCAN4                                             | zinc finger and SCAN domain containing 4                                                               |
| 0,92 | RABGGTB                                            | Zhang2013 ALT_ACCEPTOR, ALT_DONOR, coding, INTERNAL, intronic best transcript NM_004582                |
| 0,92 | OR11H12                                            | olfactory receptor, family 11, subfamily H, member 12                                                  |
| 0,92 | SAC3D1                                             | SAC3 domain containing 1                                                                               |
| 0,92 | RMDN3                                              | regulator of microtubule dynamics 3                                                                    |
| 0,92 | RNF167                                             | ring finger protein 167                                                                                |
| 0,92 | PWP2                                               | PWP2 periodic tryptophan protein homolog (yeast)                                                       |
| 0,92 | ADCYAP1R1                                          | adenylate cyclase activating polypeptide 1 (pituitary) receptor type I                                 |
| 0,92 | SERPINF1                                           | serpin peptidase inhibitor, clade F (alpha-2 antiplasmin, pigment epithelium derived factor), member 1 |

|      |          |                                                                                                                                                                                                                                                                                                                                                |
|------|----------|------------------------------------------------------------------------------------------------------------------------------------------------------------------------------------------------------------------------------------------------------------------------------------------------------------------------------------------------|
| 0,92 | GPR171   | G protein-coupled receptor 171                                                                                                                                                                                                                                                                                                                 |
| 0,92 | FNTA     | farnesyltransferase, CAAX box, alpha                                                                                                                                                                                                                                                                                                           |
| 0,92 | RPLP1    | ribosomal protein, large, P1                                                                                                                                                                                                                                                                                                                   |
| 0,92 | MRGPRF   | MAS-related GPR, member F                                                                                                                                                                                                                                                                                                                      |
| 0,92 | GGA1     | golgi-associated, gamma adaptin ear containing, ARF binding protein 1                                                                                                                                                                                                                                                                          |
| 0,92 | AFF1     | AF4/FMR2 family, member 1                                                                                                                                                                                                                                                                                                                      |
| 0,92 | TMEM9B   | TMEM9 domain family, member B                                                                                                                                                                                                                                                                                                                  |
| 0,92 | ABR      | active BCR-related                                                                                                                                                                                                                                                                                                                             |
| 0,92 | C1RL     | complement component 1, r subcomponent-like                                                                                                                                                                                                                                                                                                    |
| 0,92 | SERF2    | small EDRK-rich factor 2                                                                                                                                                                                                                                                                                                                       |
| 0,92 | SNAP47   | synaptosome associated protein 47kDa                                                                                                                                                                                                                                                                                                           |
| 0,92 | C9orf152 | chromosome 9 open reading frame 152                                                                                                                                                                                                                                                                                                            |
| 0,92 | LAG3     | lymphocyte-activation gene 3                                                                                                                                                                                                                                                                                                                   |
| 0,92 | EFCAB14  | EF-hand calcium binding domain 14                                                                                                                                                                                                                                                                                                              |
| 0,92 | ACVRL1   | activin A receptor type II                                                                                                                                                                                                                                                                                                                     |
| 0,92 | SLC36A4  | solute carrier family 36 (proton/amino acid symporter), member 4                                                                                                                                                                                                                                                                               |
| 0,92 | MROH2B   | maestro heat-like repeat family member 2B                                                                                                                                                                                                                                                                                                      |
| 0,92 | SPEG     | SPEG complex locus                                                                                                                                                                                                                                                                                                                             |
| 0,92 | LCN9     | lipocalin 9                                                                                                                                                                                                                                                                                                                                    |
| 0,92 | KPNB1    | Memczak2013 ANTISENSE, CDS, coding, INTERNAL best transcript NM_002265                                                                                                                                                                                                                                                                         |
| 0,92 | AIMP2    | aminoacyl tRNA synthetase complex-interacting multifunctional protein 2                                                                                                                                                                                                                                                                        |
| 0,92 | CCDC91   | coiled-coil domain containing 91                                                                                                                                                                                                                                                                                                               |
| 0,92 | MTNR1A   | melatonin receptor 1A                                                                                                                                                                                                                                                                                                                          |
| 0,92 | GTPBP6   | Homo sapiens GTP binding protein 6 (putative) (GTPBP6), mRNA.; GTP binding protein 6 (putative) [Source:HGNC Symbol;Acc:HGNC:30189]; Homo sapiens GTP binding protein 6 (putative), mRNA (cDNA clone MGC:1170 IMAGE:3528598), complete cds.; Salzman2013 ANNOTATED, CDS, coding, INTERNAL, OVCODE, OVERLAPTX, OVEXON best transcript NM_012227 |
| 0,92 | SHOC2    | SHOC2 leucine-rich repeat scaffold protein                                                                                                                                                                                                                                                                                                     |
| 0,92 | CHRNA1   | cholinergic receptor, nicotinic alpha 1                                                                                                                                                                                                                                                                                                        |
| 0,92 | FANCB    | Fanconi anemia complementation group B                                                                                                                                                                                                                                                                                                         |
| 0,92 | MICAL1   | Jeck2013 ANTISENSE, coding, INTERNAL, intronic best transcript NM_022765                                                                                                                                                                                                                                                                       |
| 0,92 | HYOU1    | hypoxia up-regulated 1                                                                                                                                                                                                                                                                                                                         |
| 0,92 | R3HDM2   | R3H domain containing 2                                                                                                                                                                                                                                                                                                                        |
| 0,92 | PHACTR1  | phosphatase and actin regulator 1                                                                                                                                                                                                                                                                                                              |
| 0,92 | SRXN1    | sulfiredoxin 1                                                                                                                                                                                                                                                                                                                                 |
| 0,92 | ATMIN    | ATM interactor                                                                                                                                                                                                                                                                                                                                 |
| 0,92 | HLA-F    | major histocompatibility complex, class I, F                                                                                                                                                                                                                                                                                                   |
| 0,92 | ZNF488   | zinc finger protein 488                                                                                                                                                                                                                                                                                                                        |
| 0,92 | TMUB2    | transmembrane and ubiquitin-like domain containing 2                                                                                                                                                                                                                                                                                           |
| 0,92 | LRP6     | LDL receptor related protein 6                                                                                                                                                                                                                                                                                                                 |

|      |               |                                                                                         |
|------|---------------|-----------------------------------------------------------------------------------------|
| 0,92 | CENPE         | centromere protein E                                                                    |
| 0,92 | BAZ1B         | bromodomain adjacent to zinc finger domain 1B                                           |
| 0,92 | TRAIP         | TRAF interacting protein                                                                |
| 0,92 | CENPW         | centromere protein W                                                                    |
| 0,92 | CHMP2A        | charged multivesicular body protein 2A                                                  |
| 0,92 | C12orf65      | chromosome 12 open reading frame 65                                                     |
| 0,92 | KRTAP5-6      | keratin associated protein 5-6                                                          |
| 0,92 | TTC25         | tetratricopeptide repeat domain 25                                                      |
| 0,92 | CPT1A         | carnitine palmitoyltransferase 1A (liver)                                               |
| 0,92 | ATXN3         | ataxin 3                                                                                |
| 0,92 | DHX32         | DEAH (Asp-Glu-Ala-His) box polypeptide 32                                               |
| 0,92 | CENPV         | centromere protein V                                                                    |
| 0,92 | AHCY          | adenosylhomocysteinase                                                                  |
| 0,92 | FGD6          | FYVE, RhoGEF and PH domain containing 6                                                 |
| 0,92 | C22orf23      | chromosome 22 open reading frame 23                                                     |
| 0,92 | COL11A2       | collagen, type XI, alpha 2                                                              |
| 0,92 | RPS18         | ribosomal protein S18                                                                   |
| 0,92 | FAM96B        | family with sequence similarity 96, member B                                            |
| 0,92 | CRX           | cone-rod homeobox                                                                       |
| 0,92 | KCNC4         | potassium channel, voltage gated Shaw related subfamily C, member 4                     |
| 0,92 | PLD3          | phospholipase D family, member 3                                                        |
| 0,92 | TAS2R9        | taste receptor, type 2, member 9                                                        |
| 0,92 | DDR1; MIR4640 | discoidin domain receptor tyrosine kinase 1; microRNA 4640                              |
| 0,92 | OR5AU1        | olfactory receptor, family 5, subfamily AU, member 1                                    |
| 0,92 | TBC1D8        | TBC1 domain family, member 8 (with GRAM domain)                                         |
| 0,92 | RPL9P7        | ribosomal protein L9 pseudogene 7                                                       |
| 0,92 | KRTAP8-1      | keratin associated protein 8-1                                                          |
| 0,92 | STARD9        | StAR-related lipid transfer domain containing 9                                         |
| 0,92 | FAM110B       | family with sequence similarity 110, member B                                           |
| 0,92 | ARSD          | arylsulfatase D                                                                         |
| 0,92 | LRRC66        | leucine rich repeat containing 66                                                       |
| 0,92 | GMPR          | Zhang2013 ALT_ACCEPTOR, ALT_DONOR, coding, INTERNAL, intronic best transcript NM_006877 |
| 0,92 | SNRNP200      | small nuclear ribonucleoprotein, U5 200kDa subunit                                      |
| 0,92 | R3HCC1L       | R3H domain and coiled-coil containing 1-like                                            |
| 0,92 | GOLGA5        | golgin A5                                                                               |
| 0,92 | SRGN          | serglycin                                                                               |
| 0,92 | RBFOX2        | RNA binding protein, fox-1 homolog (C. elegans) 2                                       |
| 0,92 | EIF2B5        | eukaryotic translation initiation factor 2B, subunit 5 epsilon, 82kDa                   |
| 0,92 | FZD1          | frizzled class receptor 1                                                               |
| 0,92 | HYOU1         | hypoxia up-regulated 1                                                                  |
| 0,92 | UBXN8         | UBX domain protein 8                                                                    |
| 0,92 | PRKAR1A       | protein kinase, cAMP-dependent, regulatory, type I, alpha                               |
| 0,92 | ADD1          | adducin 1 (alpha)                                                                       |

|      |                  |                                                                                                                                                                                                                                                                                    |
|------|------------------|------------------------------------------------------------------------------------------------------------------------------------------------------------------------------------------------------------------------------------------------------------------------------------|
| 0,92 | PAX2             | paired box 2                                                                                                                                                                                                                                                                       |
| 0,92 | PLXNC1           | plexin C1                                                                                                                                                                                                                                                                          |
| 0,92 | C11orf16         | chromosome 11 open reading frame 16                                                                                                                                                                                                                                                |
| 0,92 | TUSC2            | tumor suppressor candidate 2                                                                                                                                                                                                                                                       |
| 0,92 | ZP3              | zona pellucida glycoprotein 3 (sperm receptor)                                                                                                                                                                                                                                     |
| 0,92 | EYA3             | EYA transcriptional coactivator and phosphatase 3                                                                                                                                                                                                                                  |
| 0,92 | GAS2             | growth arrest-specific 2                                                                                                                                                                                                                                                           |
| 0,92 | SYNJ2            | synaptojanin 2                                                                                                                                                                                                                                                                     |
| 0,92 | TMEM116          | transmembrane protein 116                                                                                                                                                                                                                                                          |
| 0,92 | CRNDE            | colorectal neoplasia differentially expressed (non-protein coding)                                                                                                                                                                                                                 |
| 0,92 | AKR7L            | aldo-keto reductase family 7-like (gene/pseudogene)                                                                                                                                                                                                                                |
| 0,92 | MCAM;<br>MIR6756 | melanoma cell adhesion molecule; microRNA 6756                                                                                                                                                                                                                                     |
| 0,92 | CCS              | copper chaperone for superoxide dismutase                                                                                                                                                                                                                                          |
| 0,92 | PADI4            | peptidyl arginine deiminase, type IV                                                                                                                                                                                                                                               |
| 0,92 | CDKN1C           | cyclin-dependent kinase inhibitor 1C (p57, Kip2)                                                                                                                                                                                                                                   |
| 0,92 | PUM2             | pumilio RNA binding family member 2                                                                                                                                                                                                                                                |
| 0,92 | ALLC             | allantoicase                                                                                                                                                                                                                                                                       |
| 0,92 | FOXP1            | forkhead box P1                                                                                                                                                                                                                                                                    |
| 0,92 | ZSCAN5B          | zinc finger and SCAN domain containing 5B                                                                                                                                                                                                                                          |
| 0,92 | NBPF19           | neuroblastoma breakpoint family, member 19                                                                                                                                                                                                                                         |
| 0,92 | P2RY8            | purinergic receptor P2Y, G-protein coupled, 8                                                                                                                                                                                                                                      |
| 0,92 | P2RY8            | Homo sapiens purinergic receptor P2Y, G-protein coupled, 8 (P2RY8), mRNA.; purinergic receptor P2Y, G-protein coupled, 8 [Source:HGNC Symbol;Acc:HGNC:15524]; Homo sapiens purinergic receptor P2Y, G-protein coupled, 8, mRNA (cDNA clone MGC:50878 IMAGE:5787268), complete cds. |
| 0,92 | HYOU1            | hypoxia up-regulated 1                                                                                                                                                                                                                                                             |
| 0,92 | COL6A2           | collagen, type VI, alpha 2                                                                                                                                                                                                                                                         |
| 0,92 | CRB2             | crumbs family member 2                                                                                                                                                                                                                                                             |
| 0,92 | AARS             | alanyl-tRNA synthetase                                                                                                                                                                                                                                                             |
| 0,92 | EPB41L2          | erythrocyte membrane protein band 4.1-like 2                                                                                                                                                                                                                                       |
| 0,92 | MFGE8            | milk fat globule-EGF factor 8 protein                                                                                                                                                                                                                                              |
| 0,92 | ABTB2            | ankyrin repeat and BTB (POZ) domain containing 2                                                                                                                                                                                                                                   |
| 0,92 | MOB2             | MOB kinase activator 2                                                                                                                                                                                                                                                             |
| 0,92 | OXSM             | 3-oxoacyl-ACP synthase, mitochondrial                                                                                                                                                                                                                                              |
| 0,92 | ENO3             | enolase 3 (beta, muscle)                                                                                                                                                                                                                                                           |
| 0,92 | CD177            | CD177 molecule                                                                                                                                                                                                                                                                     |
| 0,92 | PDHX             | pyruvate dehydrogenase complex, component X                                                                                                                                                                                                                                        |
| 0,92 | RNF32            | ring finger protein 32                                                                                                                                                                                                                                                             |
| 0,92 | MAD2L1BP         | MAD2L1 binding protein                                                                                                                                                                                                                                                             |
| 0,92 | ITM2C            | integral membrane protein 2C                                                                                                                                                                                                                                                       |
| 0,92 | MAGED2           | MAGE family member D2                                                                                                                                                                                                                                                              |
| 0,92 | HMGCS1           | 3-hydroxy-3-methylglutaryl-CoA synthase 1 (soluble)                                                                                                                                                                                                                                |
| 0,92 | LSMEM1           | leucine-rich single-pass membrane protein 1                                                                                                                                                                                                                                        |
| 0,92 | BTBD16           | BTB (POZ) domain containing 16                                                                                                                                                                                                                                                     |
| 0,92 | DVL3             | dishevelled segment polarity protein 3                                                                                                                                                                                                                                             |

|      |                |                                                                                                           |
|------|----------------|-----------------------------------------------------------------------------------------------------------|
| 0,92 | DAB2           | Dab, mitogen-responsive phosphoprotein, homolog 2 (Drosophila)                                            |
| 0,92 | EREG           | epiregulin                                                                                                |
| 0,92 | TOP2B; MIR4442 | topoisomerase (DNA) II beta; microRNA 4442                                                                |
| 0,92 | SCN3B          | sodium channel, voltage gated, type III beta subunit                                                      |
| 0,92 | PLOD3          | procollagen-lysine, 2-oxoglutarate 5-dioxygenase 3                                                        |
| 0,92 | CCDC158        | coiled-coil domain containing 158                                                                         |
| 0,92 | CNTNAP2        | contactin associated protein-like 2                                                                       |
| 0,92 | CARD19         | caspase recruitment domain family, member 19                                                              |
| 0,92 | SLC25A28       | solute carrier family 25 (mitochondrial iron transporter), member 28                                      |
| 0,92 | DDX12P; DDX11  | DEAD/H (Asp-Glu-Ala-Asp/His) box polypeptide 12, pseudogene; DEAD/H (Asp-Glu-Ala-Asp/His) box helicase 11 |
| 0,92 | TTC13          | tetratricopeptide repeat domain 13                                                                        |
| 0,92 | ANKRD13D       | ankyrin repeat domain 13 family, member D                                                                 |
| 0,92 | ASRGL1         | asparaginase like 1                                                                                       |
| 0,92 | VPS13A         | vacuolar protein sorting 13 homolog A (S. cerevisiae)                                                     |
| 0,92 | IFNA8          | interferon, alpha 8                                                                                       |
| 0,92 | ZNF576         | zinc finger protein 576                                                                                   |
| 0,92 | HNMT           | histamine N-methyltransferase                                                                             |
| 0,92 | RAD21-AS1      | RAD21 antisense RNA 1                                                                                     |
| 0,92 | CITED4         | Cbp/p300-interacting transactivator, with Glu/Asp rich carboxy-terminal domain, 4                         |
| 0,92 | TET3           | tet methylcytosine dioxygenase 3                                                                          |
| 0,92 | OR52M1         | olfactory receptor, family 52, subfamily M, member 1                                                      |
| 0,92 | HYAL3          | hyaluronoglucosaminidase 3                                                                                |
| 0,92 | UBTFL1         | upstream binding transcription factor, RNA polymerase I-like 1                                            |
| 0,92 | SERPINF2       | serpin peptidase inhibitor, clade F (alpha-2 antiplasmin, pigment epithelium derived factor), member 2    |
| 0,92 | F7             | coagulation factor VII (serum prothrombin conversion accelerator)                                         |
| 0,92 | DSCR4          | Down syndrome critical region 4                                                                           |
| 0,92 | CENPC          | centromere protein C                                                                                      |
| 0,92 | GBP2           | guanylate binding protein 2, interferon-inducible                                                         |
| 0,92 | PICALM         | phosphatidylinositol binding clathrin assembly protein                                                    |
| 0,92 | ENOX1          | ecto-NOX disulfide-thiol exchanger 1                                                                      |
| 0,92 | FLI1           | Fli-1 proto-oncogene, ETS transcription factor                                                            |
| 0,92 | ZBED1          | zinc finger, BED-type containing 1                                                                        |
| 0,92 | SLC25A1        | solute carrier family 25 (mitochondrial carrier; citrate transporter), member 1                           |
| 0,92 | DEFB109P1B     | defensin, beta 109, pseudogene 1B                                                                         |
| 0,92 | ZNF260         | zinc finger protein 260                                                                                   |
| 0,92 | UBR1           | ubiquitin protein ligase E3 component n-recognin 1                                                        |
| 0,92 | OR4C45         | olfactory receptor, family 4, subfamily C, member 45                                                      |
| 0,92 | EFNA1          | ephrin-A1                                                                                                 |

|      |                     |                                                                                        |
|------|---------------------|----------------------------------------------------------------------------------------|
| 0,92 | SEMA3D              | sema domain, immunoglobulin domain (Ig), short basic domain, secreted, (semaphorin) 3D |
| 0,92 | BECN1               | beclin 1, autophagy related                                                            |
| 0,92 | MPP6                | membrane protein, palmitoylated 6                                                      |
| 0,92 | MYBBP1A             | MYB binding protein (P160) 1a                                                          |
| 0,92 | NDUFB8              | NADH dehydrogenase (ubiquinone) 1 beta subcomplex, 8, 19kDa                            |
| 0,92 | PER2                | period circadian clock 2                                                               |
| 0,92 | CETN1               | centrin 1                                                                              |
| 0,92 | VSIG10              | V-set and immunoglobulin domain containing 10                                          |
| 0,92 | PITPNM1             | phosphatidylinositol transfer protein, membrane-associated 1                           |
| 0,92 | SUMF1               | sulfatase modifying factor 1                                                           |
| 0,92 | PRR23D2;<br>PRR23D1 | proline rich 23 domain containing 2; proline rich 23 domain containing 1               |
| 0,92 | S100A3              | S100 calcium binding protein A3                                                        |
| 0,92 | KMT5C               | lysine (K)-specific methyltransferase 5C                                               |
| 0,92 | RHOB                | ras homolog family member B                                                            |
| 0,92 | SEL1L               | sel-1 suppressor of lin-12-like (C. elegans)                                           |
| 0,92 | RBBP4               | retinoblastoma binding protein 4                                                       |
| 0,92 | HMX3                | H6 family homeobox 3                                                                   |
| 0,92 | TMEM121             | Memczak2013 ANTISENSE, CDS, coding, INTERNAL best transcript NM_025268                 |
| 0,92 | LMX1B               | LIM homeobox transcription factor 1, beta                                              |
| 0,92 | MARVELD2            | MARVEL domain containing 2                                                             |
| 0,92 | CEP19               | centrosomal protein 19kDa                                                              |
| 0,92 | TCN2                | transcobalamin II                                                                      |
| 0,92 | CYFIP1              | cytoplasmic FMR1 interacting protein 1                                                 |
| 0,92 | SIDT2               | SID1 transmembrane family, member 2                                                    |
| 0,92 | GOLGA7              | golgin A7                                                                              |
| 0,92 | ZNF302              | zinc finger protein 302                                                                |
| 0,92 | STKLD1              | serine/threonine kinase-like domain containing 1 [Source:HGNC Symbol;Acc:HGNC:28669]   |
| 0,92 | ERVH48-1            | endogenous retrovirus group 48, member 1                                               |
| 0,92 | HLA-E               | major histocompatibility complex, class I, E                                           |
| 0,92 | KIF15               | kinesin family member 15                                                               |
| 0,92 | DNTTIP1             | deoxynucleotidyltransferase, terminal, interacting protein 1                           |
| 0,92 | TRMT61B             | tRNA methyltransferase 61B                                                             |
| 0,92 | PTPRM               | protein tyrosine phosphatase, receptor type, M                                         |
| 0,92 | OIP5                | Opa interacting protein 5                                                              |
| 0,92 | FLNC                | filamin C, gamma                                                                       |
| 0,92 | COL5A1              | collagen, type V, alpha 1                                                              |
| 0,92 | TRABD2A             | TraB domain containing 2A                                                              |
| 0,92 | MED28               | mediator complex subunit 28                                                            |
| 0,92 | PRSS48              | protease, serine, 48                                                                   |
| 0,92 | OAF                 | out at first homolog                                                                   |
| 0,92 | ANXA8L1;<br>ANXA8   | annexin A8-like 1; annexin A8                                                          |
| 0,92 | AAED1               | AhpC/TSA antioxidant enzyme domain containing 1                                        |

|      |          |                                                                                        |
|------|----------|----------------------------------------------------------------------------------------|
| 0,92 | METTL20  | methyltransferase like 20                                                              |
| 0,92 | DLGAP5   | discs, large (Drosophila) homolog-associated protein 5                                 |
| 0,92 | PDE1A    | phosphodiesterase 1A, calmodulin-dependent                                             |
| 0,92 | NDST4    | N-deacetylase/N-sulfotransferase (heparan glucosaminyl) 4                              |
| 0,92 | WDR38    | WD repeat domain 38                                                                    |
| 0,92 | RAB31    | RAB31, member RAS oncogene family                                                      |
| 0,92 | MGA      | MGA, MAX dimerization protein                                                          |
| 0,92 | NGFRAP1  | nerve growth factor receptor (TNFRSF16) associated protein 1                           |
| 0,92 | COA5     | cytochrome c oxidase assembly factor 5                                                 |
| 0,92 | MYO1F    | myosin IF                                                                              |
| 0,92 | FRYL     | FRY like transcription coactivator                                                     |
| 0,92 | OPN1MW   | opsin 1 (cone pigments), medium-wave-sensitive                                         |
| 0,92 | MGEA5    | meningioma expressed antigen 5 (hyaluronidase)                                         |
| 0,92 | NDUFA10  | NADH dehydrogenase (ubiquinone) 1 alpha subcomplex, 10, 42kDa                          |
| 0,92 | MAP2K1   | mitogen-activated protein kinase kinase 1                                              |
| 0,92 | NHS      | Nance-Horan syndrome (congenital cataracts and dental anomalies)                       |
| 0,92 | FBXW10   | F-box and WD repeat domain containing 10                                               |
| 0,92 | SLC39A13 | solute carrier family 39 (zinc transporter), member 13                                 |
| 0,92 | OR4D1    | olfactory receptor, family 4, subfamily D, member 1                                    |
| 0,92 | C4orf26  | chromosome 4 open reading frame 26                                                     |
| 0,92 | HDAC4    | Transcript Identified by AceView, Entrez Gene ID(s) 9759                               |
| 0,92 | MGP      | matrix Gla protein                                                                     |
| 0,92 | NAP1L2   | Transcript Identified by AceView, Entrez Gene ID(s) 4674                               |
| 0,92 | FFAR4    | free fatty acid receptor 4                                                             |
| 0,92 | GPR37L1  | G protein-coupled receptor 37 like 1                                                   |
| 0,92 | KLHL42   | kelch-like family member 42                                                            |
| 0,92 | CEP295   | centrosomal protein 295kDa                                                             |
| 0,92 | AP1G2    | adaptor-related protein complex 1, gamma 2 subunit                                     |
| 0,92 | MPRIIP   | myosin phosphatase Rho interacting protein                                             |
| 0,92 | UBAC2    | UBA domain containing 2                                                                |
| 0,92 | KRT82    | keratin 82, type II                                                                    |
| 0,92 | SEMA3G   | sema domain, immunoglobulin domain (Ig), short basic domain, secreted, (semaphorin) 3G |
| 0,92 | SMG5     | SMG5 nonsense mediated mRNA decay factor                                               |
| 0,92 | EPHB4    | EPH receptor B4                                                                        |
| 0,92 | MFSD4    | major facilitator superfamily domain containing 4                                      |
| 0,92 | ZSCAN29  | zinc finger and SCAN domain containing 29                                              |
| 0,92 | RASSF2   | Ras association (RalGDS/AF-6) domain family member 2                                   |
| 0,92 | ST8SIA5  | ST8 alpha-N-acetyl-neuraminide alpha-2,8-sialyltransferase 5                           |
| 0,92 | CISD3    | CDGSH iron sulfur domain 3                                                             |

|      |                          |                                                                                     |
|------|--------------------------|-------------------------------------------------------------------------------------|
| 0,92 | LOC403312;<br>AP000708.1 | putative uncharacterized protein MGC39545; novel transcript, antisense to FEZ1      |
| 0,92 | SRGAP1                   | SLIT-ROBO Rho GTPase activating protein 1                                           |
| 0,92 | SERPINA4                 | serpin peptidase inhibitor, clade A (alpha-1 antiproteinase, antitrypsin), member 4 |
| 0,92 | WDR70                    | WD repeat domain 70                                                                 |
| 0,92 | GPR158                   | G protein-coupled receptor 158                                                      |
| 0,92 | ERGIC3                   | ERGIC and golgi 3                                                                   |
| 0,92 | CLASP2                   | cytoplasmic linker associated protein 2                                             |
| 0,92 | TMEM265;<br>SRCAP        | transmembrane protein 265; Snf2-related CREBBP activator protein                    |
| 0,92 | LRRC10B                  | leucine rich repeat containing 10B                                                  |
| 0,92 | ULBP3                    | UL16 binding protein 3                                                              |
| 0,92 | FMN1                     | formin 1                                                                            |
| 0,92 | PNCK                     | pregnancy up-regulated nonubiquitous CaM kinase                                     |
| 0,92 | ARHGEF4                  | Rho guanine nucleotide exchange factor 4                                            |
| 0,92 | CEBPZ                    | CCAAT/enhancer binding protein (C/EBP), zeta                                        |
| 0,92 | ITGAL                    | integrin alpha L                                                                    |
| 0,92 | C7orf66                  | chromosome 7 open reading frame 66                                                  |
| 0,92 | PTPN20                   | protein tyrosine phosphatase, non-receptor type 20                                  |
| 0,92 | CSF2                     | colony stimulating factor 2 (granulocyte-macrophage)                                |
| 0,92 | TTYH2                    | tweety family member 2                                                              |
| 0,92 | FOXJ1                    | forkhead box J1                                                                     |
| 0,92 | FMN1                     | formin 1                                                                            |
| 0,92 | NDUFB10                  | NADH dehydrogenase (ubiquinone) 1 beta subcomplex, 10, 22kDa                        |
| 0,92 | OR6P1                    | olfactory receptor, family 6, subfamily P, member 1                                 |
| 0,92 | PALB2                    | partner and localizer of BRCA2                                                      |
| 0,92 | PIGK                     | phosphatidylinositol glycan anchor biosynthesis class K                             |
| 0,92 | QRSL1                    | Transcript Identified by AceView, Entrez Gene ID(s) 55278                           |
| 0,92 | DSTYK                    | dual serine/threonine and tyrosine protein kinase                                   |
| 0,92 | SVIL                     | supervillin                                                                         |
| 0,92 | RASA2                    | RAS p21 protein activator 2                                                         |
| 0,92 | PTH2                     | parathyroid hormone 2                                                               |
| 0,92 | SEC13                    | SEC13 homolog, nuclear pore and COPII coat complex component                        |
| 0,92 | HHAT                     | hedgehog acyltransferase                                                            |
| 0,92 | LETM1                    | leucine zipper-EF-hand containing transmembrane protein 1                           |
| 0,92 | PIM1                     | Pim-1 proto-oncogene, serine/threonine kinase                                       |
| 0,92 | OR5L2                    | olfactory receptor, family 5, subfamily L, member 2                                 |
| 0,92 | LDHAL6A                  | lactate dehydrogenase A-like 6A                                                     |
| 0,92 | TGFBR1                   | transforming growth factor, beta receptor 1                                         |
| 0,92 | OR52R1                   | olfactory receptor, family 52, subfamily R, member 1 (gene/pseudogene)              |
| 0,92 | CC2D2B                   | coiled-coil and C2 domain containing 2B                                             |
| 0,92 | ACSS1                    | acyl-CoA synthetase short-chain family member 1                                     |
| 0,92 | CEP57                    | centrosomal protein 57kDa                                                           |

|      |                         |                                                                                                                       |
|------|-------------------------|-----------------------------------------------------------------------------------------------------------------------|
| 0,92 | CSAG3                   | CSAG family, member 3                                                                                                 |
| 0,92 | YY1; MIR6764            | YY1 transcription factor; microRNA 6764                                                                               |
| 0,92 | CYSTM1                  | cysteine-rich transmembrane module containing 1                                                                       |
| 0,92 | MST1                    | macrophage stimulating 1                                                                                              |
| 0,92 | C9orf64                 | chromosome 9 open reading frame 64                                                                                    |
| 0,92 | DEFB127                 | defensin, beta 127                                                                                                    |
| 0,92 | TMEM5                   | transmembrane protein 5                                                                                               |
| 0,92 | BCL2L14                 | BCL2-like 14 (apoptosis facilitator)                                                                                  |
| 0,92 | FBXW12                  | F-box and WD repeat domain containing 12                                                                              |
| 0,92 | KLF13                   | Kruppel-like factor 13                                                                                                |
| 0,92 | NCAM2                   | Salzman2013 ALT_ACCEPTOR, ALT_DONOR, coding, INTERNAL, intronic best transcript NM_004540                             |
| 0,92 | MN1                     | meningioma (disrupted in balanced translocation) 1                                                                    |
| 0,92 | ITGB3BP                 | integrin beta 3 binding protein (beta3-endonexin)                                                                     |
| 0,92 | ABL2                    | ABL proto-oncogene 2, non-receptor tyrosine kinase                                                                    |
| 0,92 | CRELD2                  | cysteine rich with EGF-like domains 2                                                                                 |
| 0,92 | GOLGA8M                 | golgin A8 family, member M                                                                                            |
| 0,92 | SMIM17                  | small integral membrane protein 17                                                                                    |
| 0,92 | DOCK7                   | dedicator of cytokinesis 7                                                                                            |
| 0,92 | FAM110A                 | family with sequence similarity 110, member A                                                                         |
| 0,92 | TET2                    | tet methylcytosine dioxygenase 2                                                                                      |
| 0,92 | MYEF2                   | Transcript Identified by AceView, Entrez Gene ID(s) 50804                                                             |
| 0,92 | ARPC1B                  | actin related protein 2/3 complex subunit 1B                                                                          |
| 0,92 | ATP6V1D                 | ATPase, H <sup>+</sup> transporting, lysosomal 34kDa, V1 subunit D                                                    |
| 0,92 | CYBA                    | cytochrome b-245, alpha polypeptide                                                                                   |
| 0,92 | NDN                     | necdin, MAGE family member                                                                                            |
| 0,92 | FBLN7                   | fibulin 7                                                                                                             |
| 0,92 | BICC1                   | BicC family RNA binding protein 1                                                                                     |
| 0,92 | NPVF                    | neuropeptide VF precursor                                                                                             |
| 0,92 | CACNB4                  | calcium channel, voltage-dependent, beta 4 subunit                                                                    |
| 0,92 | OR4K13                  | olfactory receptor, family 4, subfamily K, member 13                                                                  |
| 0,92 | SMOC2                   | SPARC related modular calcium binding 2                                                                               |
| 0,92 | PDF; COG8; TMED6        | peptide deformylase (mitochondrial); component of oligomeric golgi complex 8; transmembrane p24 trafficking protein 6 |
| 0,92 | MGAT4EP                 | MGAT4 family, member E, pseudogene                                                                                    |
| 0,92 | FRK                     | fyn-related Src family tyrosine kinase                                                                                |
| 0,92 | MYEOV2                  | myeloma overexpressed 2                                                                                               |
| 0,92 | THAP2                   | THAP domain containing, apoptosis associated protein 2                                                                |
| 0,92 | DGCR8; MIR1306; MIR3618 | DGCR8 microprocessor complex subunit; microRNA 1306; microRNA 3618                                                    |
| 0,92 | AQP4                    | aquaporin 4                                                                                                           |
| 0,92 | ROR1                    | receptor tyrosine kinase-like orphan receptor 1                                                                       |
| 0,92 | HOXA5                   | homeobox A5                                                                                                           |
| 0,92 | NBPF11                  | neuroblastoma breakpoint family, member 11                                                                            |

|      |                                        |                                                                                         |
|------|----------------------------------------|-----------------------------------------------------------------------------------------|
| 0,92 | FUT11                                  | fucosyltransferase 11 (alpha (1,3) fucosyltransferase)                                  |
| 0,92 | PYGB                                   | phosphorylase, glycogen; brain                                                          |
| 0,92 | CAST                                   | calpastatin                                                                             |
| 0,92 | PHF5A                                  | PHD finger protein 5A                                                                   |
| 0,92 | ANKRD35                                | ankyrin repeat domain 35                                                                |
| 0,92 | HGFAC                                  | HGF activator                                                                           |
| 0,92 | RPL27                                  | ribosomal protein L27                                                                   |
| 0,92 | GFRA2                                  | GDNF family receptor alpha 2                                                            |
| 0,92 | ITGAE                                  | integrin alpha E                                                                        |
| 0,92 | PECAM1                                 | platelet/endothelial cell adhesion molecule 1                                           |
| 0,92 | CBFA2T3                                | core-binding factor, runt domain, alpha subunit 2; translocated to, 3                   |
| 0,92 | RNF113A                                | ring finger protein 113A                                                                |
| 0,92 | ARHGAP23                               | Rho GTPase activating protein 23                                                        |
| 0,92 | ARID5A                                 | AT rich interactive domain 5A (MRF1-like)                                               |
| 0,92 | NOXRED1                                | NADP-dependent oxidoreductase domain containing 1                                       |
| 0,92 | LRRC45                                 | leucine rich repeat containing 45                                                       |
| 0,92 | GPRC5B                                 | G protein-coupled receptor, class C, group 5, member B                                  |
| 0,92 | RNF187                                 | ring finger protein 187                                                                 |
| 0,92 | KLHDC4                                 | Transcript Identified by AceView, Entrez Gene ID(s) 54758; 100129637                    |
| 0,92 | NR1D2                                  | nuclear receptor subfamily 1, group D, member 2                                         |
| 0,92 | PLXNB1                                 | plexin B1                                                                               |
| 0,92 | C2CD2                                  | C2 calcium-dependent domain containing 2                                                |
| 0,92 | BORCS8;<br>MEF2B;<br>MEF2BNB-<br>MEF2B | BLOC-1 related complex subunit 8; myocyte enhancer factor 2B; MEF2BNB-MEF2B readthrough |
| 0,92 | ARID4A                                 | AT rich interactive domain 4A (RBP1-like)                                               |
| 0,92 | INA                                    | internexin neuronal intermediate filament protein, alpha                                |
| 0,92 | HYOU1                                  | hypoxia up-regulated 1                                                                  |
| 0,92 | MAN2A1                                 | mannosidase, alpha, class 2A, member 1                                                  |
| 0,92 | PSD2                                   | pleckstrin and Sec7 domain containing 2                                                 |
| 0,92 | DPPA2                                  | developmental pluripotency associated 2                                                 |
| 0,92 | C11orf70                               | chromosome 11 open reading frame 70                                                     |
| 0,92 | DOK4                                   | docking protein 4                                                                       |
| 0,92 | CYTH2                                  | cytohesin 2                                                                             |
| 0,92 | VASP                                   | vasodilator-stimulated phosphoprotein                                                   |
| 0,92 | ANKRD50                                | ankyrin repeat domain 50                                                                |
| 0,92 | WDR49                                  | WD repeat domain 49                                                                     |
| 0,92 | FBXL16                                 | F-box and leucine-rich repeat protein 16                                                |
| 0,92 | ZNF346                                 | zinc finger protein 346                                                                 |
| 0,92 | RELB                                   | v-rel avian reticuloendotheliosis viral oncogene homolog B                              |
| 0,92 | NTN3                                   | netrin 3                                                                                |
| 0,92 | ZNF284                                 | zinc finger protein 284                                                                 |
| 0,92 | CROT                                   | carnitine O-octanoyltransferase                                                         |

|      |                                 |                                                                                                       |
|------|---------------------------------|-------------------------------------------------------------------------------------------------------|
| 0,92 | MROH8                           | maestro heat-like repeat family member 8                                                              |
| 0,92 | JADE1                           | jade family PHD finger 1                                                                              |
| 0,92 | LYZL4                           | lysozyme-like 4                                                                                       |
| 0,92 | FRMD7                           | FERM domain containing 7                                                                              |
| 0,92 | PTCHD1                          | patched domain containing 1                                                                           |
| 0,92 | ZNF396                          | zinc finger protein 396                                                                               |
| 0,92 | TKTL2                           | transketolase-like 2                                                                                  |
| 0,92 | TPD52L3                         | tumor protein D52-like 3                                                                              |
| 0,92 | MMRN2                           | multimerin 2                                                                                          |
| 0,92 | RAB43                           | Memczak2013 ALT_ACCEPTOR, ALT_DONOR, coding, INTERNAL, intronic best transcript NM_001204883          |
| 0,92 | CD82                            | CD82 molecule                                                                                         |
| 0,92 | HID1                            | HID1 domain containing                                                                                |
| 0,92 | EML4                            | echinoderm microtubule associated protein like 4                                                      |
| 0,92 | SOCS7                           | suppressor of cytokine signaling 7                                                                    |
| 0,92 | C1orf158                        | Transcript Identified by AceView, Entrez Gene ID(s) 93190                                             |
| 0,92 | C5AR1                           | complement component 5a receptor 1                                                                    |
| 0,92 | PC                              | pyruvate carboxylase                                                                                  |
| 0,92 | OR5J2                           | olfactory receptor, family 5, subfamily J, member 2                                                   |
| 0,92 | NOP14                           | NOP14 nucleolar protein                                                                               |
| 0,92 | TM2D3                           | TM2 domain containing 3                                                                               |
| 0,92 | MIR99AHG                        | mir-99a-let-7c cluster host gene                                                                      |
| 0,92 | MEGF8                           | multiple EGF-like-domains 8                                                                           |
| 0,92 | HEATR3                          | HEAT repeat containing 3                                                                              |
| 0,92 | FMN1                            | formin 1                                                                                              |
| 0,92 | GYG2                            | glycogenin 2                                                                                          |
| 0,92 | FAM161A                         | family with sequence similarity 161, member A                                                         |
| 0,92 | OR8K5                           | olfactory receptor, family 8, subfamily K, member 5                                                   |
| 0,92 | ANKIB1                          | ankyrin repeat and IBR domain containing 1                                                            |
| 0,92 | PLEKHA6                         | pleckstrin homology domain containing, family A member 6                                              |
| 0,92 | INTS7                           | integrator complex subunit 7                                                                          |
| 0,92 | FOXN3                           | forkhead box N3                                                                                       |
| 0,92 | DDX50                           | DEAD (Asp-Glu-Ala-Asp) box polypeptide 50                                                             |
| 0,92 | PDE8A                           | phosphodiesterase 8A                                                                                  |
| 0,92 | CXCL11                          | chemokine (C-X-C motif) ligand 11                                                                     |
| 0,92 | LGALS1                          | lectin, galactoside-binding, soluble, 1                                                               |
| 0,92 | DEFB125                         | defensin, beta 125                                                                                    |
| 0,92 | LOC283710; RP11-16E12.2; rukama | uncharacterized LOC283710; novel transcript; Transcript Identified by AceView                         |
| 0,92 | BIRC7                           | baculoviral IAP repeat containing 7                                                                   |
| 0,92 | TAAR2                           | trace amine associated receptor 2                                                                     |
| 0,92 | IL23A                           | interleukin 23, alpha subunit p19                                                                     |
| 0,92 | CDC42EP5                        | CDC42 effector protein (Rho GTPase binding) 5                                                         |
| 0,92 | MGC45922; CTD-2568A17.5         | uncharacterized LOC284365; uncharacterized LOC284365 [Source:EntrezGene;Acc:284365]; novel transcript |

|      |                                            |                                                                                                                                                                          |
|------|--------------------------------------------|--------------------------------------------------------------------------------------------------------------------------------------------------------------------------|
| 0,92 | OR51V1                                     | olfactory receptor, family 51, subfamily V, member 1                                                                                                                     |
| 0,92 | CNKSR2                                     | connector enhancer of kinase suppressor of Ras 2                                                                                                                         |
| 0,92 | PPP3R2                                     | protein phosphatase 3, regulatory subunit B, beta                                                                                                                        |
| 0,92 | HDAC9                                      | histone deacetylase 9                                                                                                                                                    |
| 0,92 | KRT36                                      | keratin 36, type I                                                                                                                                                       |
| 0,92 | SELE                                       | selectin E                                                                                                                                                               |
| 0,92 | EZH2                                       | Transcript Identified by AceView, Entrez Gene ID(s)<br>2146                                                                                                              |
| 0,92 | MTERF2                                     | mitochondrial transcription termination factor 2                                                                                                                         |
| 0,92 | LRTM1                                      | leucine-rich repeats and transmembrane domains 1                                                                                                                         |
| 0,92 | LOC101928877;<br>RP11-386B13.3;<br>SLC25A4 | uncharacterized LOC101928877; novel transcript;<br>Transcript Identified by AceView, Entrez Gene ID(s)<br>291                                                            |
| 0,92 | HDAC3                                      | histone deacetylase 3                                                                                                                                                    |
| 0,92 | ADAM12                                     | ADAM metalloproteinase domain 12                                                                                                                                         |
| 0,92 | CLN8                                       | ceroid-lipofuscinosis, neuronal 8                                                                                                                                        |
| 0,92 | BEND4                                      | BEN domain containing 4                                                                                                                                                  |
| 0,92 | CCDC27                                     | coiled-coil domain containing 27                                                                                                                                         |
| 0,92 | STAT5B                                     | Transcript Identified by AceView, Entrez Gene ID(s)<br>6777                                                                                                              |
| 0,92 | WDR66                                      | WD repeat domain 66                                                                                                                                                      |
| 0,92 | CDK15                                      | cyclin-dependent kinase 15                                                                                                                                               |
| 0,92 | SCAF8; TIAM2                               | SR-related CTD-associated factor 8; T-cell lymphoma<br>invasion and metastasis 2                                                                                         |
| 0,92 | PRAMEF19                                   | PRAME family member 19                                                                                                                                                   |
| 0,92 | TBPL1                                      | TBP-like 1                                                                                                                                                               |
| 0,92 | TAS2R1                                     | taste receptor, type 2, member 1                                                                                                                                         |
| 0,92 | DNAJC4                                     | DnaJ (Hsp40) homolog, subfamily C, member 4                                                                                                                              |
| 0,92 | SNRPN; SNURF;<br>SNORD107;<br>PWARN        | small nuclear ribonucleoprotein polypeptide N;<br>SNRPN upstream reading frame; small nucleolar RNA,<br>C/D box 107; Prader Willi/Angelman region RNA,<br>SNRPN neighbor |
| 0,92 | FUCA1                                      | fucosidase, alpha-L- 1, tissue                                                                                                                                           |
| 0,92 | CYSLTR2                                    | cysteinyl leukotriene receptor 2                                                                                                                                         |
| 0,92 | MSH5; MSH5-<br>SAPCD1;<br>SAPCD1           | mutS homolog 5; MSH5-SAPCD1 readthrough (NMD<br>candidate); suppressor APC domain containing 1                                                                           |
| 0,92 | FOXD2                                      | forkhead box D2                                                                                                                                                          |
| 0,92 | MPP2                                       | membrane protein, palmitoylated 2                                                                                                                                        |
| 0,92 | EIF3D                                      | eukaryotic translation initiation factor 3, subunit D                                                                                                                    |
| 0,92 | GULP1                                      | GULP, engulfment adaptor PTB domain containing 1                                                                                                                         |
| 0,92 | OR5M10                                     | olfactory receptor, family 5, subfamily M, member 10                                                                                                                     |
| 0,92 | MEIS1                                      | Meis homeobox 1                                                                                                                                                          |
| 0,92 | MEX3D                                      | mex-3 RNA binding family member D                                                                                                                                        |
| 0,92 | EDN2                                       | endothelin 2                                                                                                                                                             |
| 0,92 | RHPN1                                      | rhophilin, Rho GTPase binding protein 1                                                                                                                                  |
| 0,92 | OR10V1                                     | olfactory receptor, family 10, subfamily V, member 1                                                                                                                     |
| 0,92 | HMBS                                       | hydroxymethylbilane synthase                                                                                                                                             |
| 0,92 | AHSG                                       | alpha-2-HS-glycoprotein                                                                                                                                                  |
| 0,92 | SGCB                                       | sarcoglycan beta                                                                                                                                                         |

|      |                           |                                                                                                         |
|------|---------------------------|---------------------------------------------------------------------------------------------------------|
| 0,92 | DENND5B                   | DENN/MADD domain containing 5B                                                                          |
| 0,92 | PHPT1                     | phosphohistidine phosphatase 1                                                                          |
| 0,92 | TNS4                      | tensin 4                                                                                                |
| 0,92 | PEX16                     | peroxisomal biogenesis factor 16                                                                        |
| 0,92 | MS4A5                     | membrane-spanning 4-domains, subfamily A, member 5                                                      |
| 0,92 | GAB2                      | GRB2-associated binding protein 2                                                                       |
| 0,92 | ENDOG                     | endonuclease G                                                                                          |
| 0,92 | PPAN-P2RY11; P2RY11; PPAN | PPAN-P2RY11 readthrough; purinergic receptor P2Y, G-protein coupled, 11; peter pan homolog (Drosophila) |
| 0,92 | MAPKBP1                   | mitogen-activated protein kinase binding protein 1                                                      |
| 0,92 | GALNT10                   | polypeptide N-acetylgalactosaminyltransferase 10                                                        |
| 0,92 | C1QL1                     | complement component 1, q subcomponent-like 1                                                           |
| 0,92 | JMJD6                     | jumonji domain containing 6                                                                             |
| 0,92 | MAPK7                     | mitogen-activated protein kinase 7                                                                      |
| 0,92 | OR10H3                    | olfactory receptor, family 10, subfamily H, member 3                                                    |
| 0,92 | DSEL                      | dermatan sulfate epimerase-like                                                                         |
| 0,92 | OR2D2                     | olfactory receptor, family 2, subfamily D, member 2                                                     |
| 0,92 | GP2                       | glycoprotein 2 (zymogen granule membrane)                                                               |
| 0,92 | LMBR1                     | Transcript Identified by AceView, Entrez Gene ID(s) 64327                                               |
| 0,92 | N4BP2                     | NEDD4 binding protein 2                                                                                 |
| 0,92 | GTPBP6                    | GTP binding protein 6 (putative)                                                                        |
| 0,92 | TNRC18                    | trinucleotide repeat containing 18                                                                      |
| 0,92 | BCL2L14                   | BCL2-like 14 (apoptosis facilitator)                                                                    |
| 0,92 | VWC2L                     | von Willebrand factor C domain containing protein 2-like                                                |
| 0,92 | GPR78                     | G protein-coupled receptor 78                                                                           |
| 0,92 | PBLD                      | phenazine biosynthesis-like protein domain containing                                                   |
| 0,92 | ZNF501                    | zinc finger protein 501                                                                                 |
| 0,92 | LOC389199; AC097381.1     | uncharacterized LOC389199; Transcript Identified by AceView, Entrez Gene ID(s) 389199; novel transcript |
| 0,92 | ZSCAN26                   | zinc finger and SCAN domain containing 26                                                               |
| 0,92 | FOXP4; MIR4641            | forkhead box P4; microRNA 4641                                                                          |
| 0,92 | SIRPB1                    | signal-regulatory protein beta 1                                                                        |
| 0,92 | ZNF276                    | zinc finger protein 276                                                                                 |
| 0,92 | SERPINB6                  | serpin peptidase inhibitor, clade B (ovalbumin), member 6                                               |
| 0,92 | NLRP6                     | NLR family, pyrin domain containing 6                                                                   |
| 0,92 | TSPAN7                    | tetraspanin 7                                                                                           |
| 0,92 | RTP3                      | receptor (chemosensory) transporter protein 3                                                           |
| 0,92 | BNIP3                     | BCL2/adenovirus E1B 19kDa interacting protein 3                                                         |
| 0,92 | ANKRD36                   | Transcript Identified by AceView, Entrez Gene ID(s) 375248                                              |
| 0,92 | KIFC1                     | kinesin family member C1                                                                                |
| 0,92 | GABPB2                    | GA binding protein transcription factor, beta subunit 2                                                 |
| 0,92 | TDGF1                     | teratocarcinoma-derived growth factor 1                                                                 |

|      |                    |                                                                          |
|------|--------------------|--------------------------------------------------------------------------|
| 0,92 | SF3B3              | splicing factor 3b subunit 3                                             |
| 0,92 | C2orf70            | chromosome 2 open reading frame 70                                       |
| 0,92 | ZNF79              | zinc finger protein 79                                                   |
| 0,92 | WDR81              | WD repeat domain 81                                                      |
| 0,92 | PEX5L              | Transcript Identified by AceView, Entrez Gene ID(s)<br>51555             |
| 0,92 | MON1A              | MON1 secretory trafficking family member A                               |
| 0,92 | SLC37A1            | solute carrier family 37 (glucose-6-phosphate transporter), member 1     |
| 0,92 | SPECC1L            | sperm antigen with calponin homology and coiled-coil domains 1-like      |
| 0,92 | RC3H1              | ring finger and CCCH-type domains 1                                      |
| 0,92 | KANSL2;<br>SNORA2B | KAT8 regulatory NSL complex subunit 2; small nucleolar RNA, H/ACA box 2B |
| 0,92 | IQGAP1             | IQ motif containing GTPase activating protein 1                          |
| 0,92 | ZNF487             | zinc finger protein 487                                                  |
| 0,92 | PCDHB8             | protocadherin beta 8                                                     |
| 0,92 | BTBD9              | BTB (POZ) domain containing 9                                            |
| 0,92 | DGKD               | diacylglycerol kinase, delta 130kDa                                      |
| 0,92 | NMBR               | neuromedin B receptor                                                    |
| 0,92 | ZNF175             | zinc finger protein 175                                                  |
| 0,92 | SHOX2              | short stature homeobox 2                                                 |
| 0,92 | IRF5               | interferon regulatory factor 5                                           |
| 0,92 | OR4K14             | olfactory receptor, family 4, subfamily K, member 14                     |
| 0,92 | GNPDA1             | glucosamine-6-phosphate deaminase 1                                      |
| 0,92 | CPVL               | carboxypeptidase, vitellogenic-like                                      |
| 0,92 | KCNJ12             | potassium channel, inwardly rectifying subfamily J, member 12            |
| 0,91 | KIAA1755           | KIAA1755                                                                 |
| 0,91 | GCA                | grancalcin, EF-hand calcium binding protein                              |
| 0,91 | ITGB2              | integrin, beta 2 (complement component 3 receptor 3 and 4 subunit)       |
| 0,91 | DRD2               | dopamine receptor D2                                                     |
| 0,91 | STARD5             | StAR-related lipid transfer domain containing 5                          |
| 0,91 | MARCH8             | Transcript Identified by AceView, Entrez Gene ID(s)<br>220972            |
| 0,91 | SERPINB1           | serpin peptidase inhibitor, clade B (ovalbumin), member 1                |
| 0,91 | KLHL21             | kelch-like family member 21                                              |
| 0,91 | PTPN14             | protein tyrosine phosphatase, non-receptor type 14                       |
| 0,91 | PDE4DIP            | Transcript Identified by AceView, Entrez Gene ID(s)<br>9659              |
| 0,91 | C17orf67           | chromosome 17 open reading frame 67                                      |
| 0,91 | AOC1               | amine oxidase, copper containing 1                                       |
| 0,91 | FCGR3B             | Fc fragment of IgG, low affinity IIIb, receptor (CD16b)                  |
| 0,91 | UBAP1L             | ubiquitin associated protein 1 like                                      |
| 0,91 | PPIAL4E            | peptidylprolyl isomerase A (cyclophilin A)-like 4E                       |
| 0,91 | GPAT4              | glycerol-3-phosphate acyltransferase 4                                   |

|      |             |                                                                                        |
|------|-------------|----------------------------------------------------------------------------------------|
| 0,91 | ADAMTS20    | ADAM metallopeptidase with thrombospondin type 1 motif 20                              |
| 0,91 | CIB1        | calcium and integrin binding 1 (calmyrin)                                              |
| 0,91 | ROPN1       | rhophilin associated tail protein 1                                                    |
| 0,91 | CCDC125     | coiled-coil domain containing 125                                                      |
| 0,91 | PLIN1       | perilipin 1                                                                            |
| 0,91 | DNM2        | dynamamin 2                                                                            |
| 0,91 | ISG20       | interferon stimulated exonuclease gene 20kDa                                           |
| 0,91 | TAS2R40     | taste receptor, type 2, member 40                                                      |
| 0,91 | ZNF660      | zinc finger protein 660                                                                |
| 0,91 | ACTA2       | actin, alpha 2, smooth muscle, aorta                                                   |
| 0,91 | SLC25A41    | solute carrier family 25, member 41                                                    |
| 0,91 | MATN1       | matrilin 1, cartilage matrix protein                                                   |
| 0,91 | GCNT6       | glucosaminyl (N-acetyl) transferase 6 [Source:HGNC Symbol;Acc:HGNC:21623]              |
| 0,91 | TPI1        | triosephosphate isomerase 1                                                            |
| 0,91 | ARGFX       | arginine-fifty homeobox                                                                |
| 0,91 | PFAS        | phosphoribosylformylglycinamidase synthase                                             |
| 0,91 | SEC62       | SEC62 homolog, preprotein translocation factor                                         |
| 0,91 | DCP2        | decapping mRNA 2                                                                       |
| 0,91 | MCL1        | myeloid cell leukemia 1                                                                |
| 0,91 | PRAMEF18    | PRAME family member 18                                                                 |
| 0,91 | BRMS1       | breast cancer metastasis suppressor 1                                                  |
| 0,91 | PHOX2A      | paired-like homeobox 2a                                                                |
| 0,91 | LRRIQ1      | leucine-rich repeats and IQ motif containing 1                                         |
| 0,91 | BMP2        | bone morphogenetic protein 2                                                           |
| 0,91 | DNAH7       | dynein, axonemal, heavy chain 7                                                        |
| 0,91 | HMBS        | hydroxymethylbilane synthase                                                           |
| 0,91 | SLA2        | Src-like-adaptor 2                                                                     |
| 0,91 | PAM         | peptidylglycine alpha-amidating monooxygenase                                          |
| 0,91 | COA1        | cytochrome c oxidase assembly factor 1 homolog                                         |
| 0,91 | IFT140      | intraflagellar transport 140                                                           |
| 0,91 | PDCD6       | programmed cell death 6                                                                |
| 0,91 | SIGLEC11    | sialic acid binding Ig-like lectin 11                                                  |
| 0,91 | TCF12       | transcription factor 12                                                                |
| 0,91 | APBB2       | Jeck2013 ALT_ACCEPTOR, ALT_DONOR, coding, INTERNAL, intronic best transcript NM_004307 |
| 0,91 | NEUROD1     | neuronal differentiation 1                                                             |
| 0,91 | SLC10A5     | solute carrier family 10, member 5                                                     |
| 0,91 | FAM157A     | family with sequence similarity 157, member A                                          |
| 0,91 | BCAS4       | breast carcinoma amplified sequence 4                                                  |
| 0,91 | FKBP2       | FK506 binding protein 2                                                                |
| 0,91 | SLC22A5     | solute carrier family 22 (organic cation/carnitine transporter), member 5              |
| 0,91 | KIF1B       | kinesin family member 1B                                                               |
| 0,91 | CMC4; MTCPI | C-x(9)-C motif containing 4; mature T-cell proliferation 1                             |
| 0,91 | LHX1        | LIM homeobox 1                                                                         |
| 0,91 | TACR2       | tachykinin receptor 2                                                                  |

|      |                         |                                                                                                                                               |
|------|-------------------------|-----------------------------------------------------------------------------------------------------------------------------------------------|
| 0,91 | LOC101928034;<br>S100A3 | uncharacterized LOC101928034; Salzman2013<br>ANTISENSE, CDS, coding, INTERNAL, intronic,<br>OVCODE, OVEXON, UTR5 best transcript<br>NM_002960 |
| 0,91 | ARL14EPL                | ADP-ribosylation factor like GTPase 14 effector<br>protein like                                                                               |
| 0,91 | ODF2L                   | outer dense fiber of sperm tails 2-like                                                                                                       |
| 0,91 | FAM109A                 | family with sequence similarity 109, member A                                                                                                 |
| 0,91 | DKK4                    | dickkopf WNT signaling pathway inhibitor 4                                                                                                    |
| 0,91 | COL9A3                  | collagen, type IX, alpha 3                                                                                                                    |
| 0,91 | KDM5A                   | lysine (K)-specific demethylase 5A                                                                                                            |
| 0,91 | PM20D2                  | peptidase M20 domain containing 2                                                                                                             |
| 0,91 | TMEM257                 | transmembrane protein 257                                                                                                                     |
| 0,91 | TMEM106C                | transmembrane protein 106C                                                                                                                    |
| 0,91 | RGMB                    | repulsive guidance molecule family member b                                                                                                   |
| 0,91 | OSGIN1                  | oxidative stress induced growth inhibitor 1                                                                                                   |
| 0,91 | BLOC1S1                 | biogenesis of lysosomal organelles complex-1, subunit<br>1                                                                                    |
| 0,91 | FCRLA                   | Fc receptor-like A                                                                                                                            |
| 0,91 | HNRNPLL                 | heterogeneous nuclear ribonucleoprotein L-like                                                                                                |
| 0,91 | PSMB4                   | proteasome subunit beta 4                                                                                                                     |
| 0,91 | IFNA14                  | interferon, alpha 14                                                                                                                          |
| 0,91 | SYTL5                   | synaptotagmin-like 5                                                                                                                          |
| 0,91 | REST                    | RE1-silencing transcription factor                                                                                                            |
| 0,91 | WDR83                   | WD repeat domain 83                                                                                                                           |
| 0,91 | ANOS1                   | anosmin 1                                                                                                                                     |
| 0,91 | TRMT61A                 | tRNA methyltransferase 61A                                                                                                                    |
| 0,91 | MAP3K1                  | mitogen-activated protein kinase kinase kinase 1, E3<br>ubiquitin protein ligase                                                              |
| 0,91 | NDUFA10                 | NADH dehydrogenase (ubiquinone) 1 alpha<br>subcomplex, 10, 42kDa                                                                              |
| 0,91 | KRT10                   | keratin 10, type I                                                                                                                            |
| 0,91 | COL6A2                  | Jeck2013 ANTISENSE, CDS, coding, INTERNAL,<br>intronic, OVCODE, OVEXON best transcript<br>NM_058175                                           |
| 0,91 | CES3; CES2              | carboxylesterase 3; carboxylesterase 2                                                                                                        |
| 0,91 | KIAA0232                | KIAA0232                                                                                                                                      |
| 0,91 | CHTOP                   | chromatin target of PRMT1                                                                                                                     |
| 0,91 | NRBP2; MIR6845          | nuclear receptor binding protein 2; microRNA 6845                                                                                             |
| 0,91 | DCUN1D3                 | DCN1, defective in cullin neddylation 1, domain<br>containing 3                                                                               |
| 0,91 | NUP133                  | nucleoporin 133kDa                                                                                                                            |
| 0,91 | SLC22A31                | solute carrier family 22, member 31                                                                                                           |
| 0,91 | CASKIN1                 | CASK interacting protein 1                                                                                                                    |
| 0,91 | TRAPPC4                 | trafficking protein particle complex 4                                                                                                        |
| 0,91 | CCL18                   | chemokine (C-C motif) ligand 18                                                                                                               |
| 0,91 | PDX1                    | pancreatic and duodenal homeobox 1                                                                                                            |
| 0,91 | GTF2IRD2;<br>GTF2IRD2B  | GTF2I repeat domain containing 2; GTF2I repeat<br>domain containing 2B                                                                        |

|      |           |                                                                       |
|------|-----------|-----------------------------------------------------------------------|
| 0,91 | TRIM36    | tripartite motif containing 36                                        |
| 0,91 | ATXN1     | ataxin 1                                                              |
| 0,91 | GNB2      | guanine nucleotide binding protein (G protein), beta polypeptide 2    |
| 0,91 | CXCL9     | chemokine (C-X-C motif) ligand 9                                      |
| 0,91 | BPIFB4    | BPI fold containing family B, member 4                                |
| 0,91 | SLC25A14  | solute carrier family 25 (mitochondrial carrier, brain), member 14    |
| 0,91 | NIT1      | nitrilase 1                                                           |
| 0,91 | YIPF1     | Yip1 domain family member 1                                           |
| 0,91 | FAM149B1  | family with sequence similarity 149, member B1                        |
| 0,91 | PALLD     | palladin, cytoskeletal associated protein                             |
| 0,91 | SERPIND1  | serpin peptidase inhibitor, clade D (heparin cofactor), member 1      |
| 0,91 | NUPR1     | nuclear protein 1, transcriptional regulator                          |
| 0,91 | ACSM2B    | acyl-CoA synthetase medium-chain family member 2B                     |
| 0,91 | GUCA2A    | guanylate cyclase activator 2A (guanylin)                             |
| 0,91 | DSE       | dermatan sulfate epimerase                                            |
| 0,91 | DUPD1     | dual specificity phosphatase and pro isomerase domain containing 1    |
| 0,91 | CABLES1   | Cdk5 and Abl enzyme substrate 1                                       |
| 0,91 | FAR2      | fatty acyl-CoA reductase 2                                            |
| 0,91 | ZFYVE26   | zinc finger, FYVE domain containing 26                                |
| 0,91 | LONP1     | lon peptidase 1, mitochondrial                                        |
| 0,91 | PRKAR1B   | protein kinase, cAMP-dependent, regulatory, type I, beta              |
| 0,91 | MPI       | mannose phosphate isomerase                                           |
| 0,91 | ACOX2     | acyl-CoA oxidase 2, branched chain                                    |
| 0,91 | TTLL11    | tubulin tyrosine ligase-like family member 11                         |
| 0,91 | ATG5      | autophagy related 5                                                   |
| 0,91 | SFPQ      | splicing factor proline/glutamine-rich                                |
| 0,91 | PPM1B     | protein phosphatase, Mg <sup>2+</sup> /Mn <sup>2+</sup> dependent, 1B |
| 0,91 | DNAJC13   | DnaJ (Hsp40) homolog, subfamily C, member 13                          |
| 0,91 | TMEM52    | transmembrane protein 52                                              |
| 0,91 | KRTAP10-1 | keratin associated protein 10-1                                       |
| 0,91 | IGF1      | insulin-like growth factor 1 (somatomedin C)                          |
| 0,91 | FADS2     | fatty acid desaturase 2                                               |
| 0,91 | DMXL1     | Dmx-like 1                                                            |
| 0,91 | C2orf66   | chromosome 2 open reading frame 66                                    |
| 0,91 | RET       | ret proto-oncogene                                                    |
| 0,91 | ALDH3B2   | aldehyde dehydrogenase 3 family, member B2                            |
| 0,91 | CDC42SE2  | CDC42 small effector 2                                                |
| 0,91 | COG5      | component of oligomeric golgi complex 5                               |
| 0,91 | ZNF292    | zinc finger protein 292                                               |
| 0,91 | C11orf96  | chromosome 11 open reading frame 96                                   |
| 0,91 | OR2T29    | olfactory receptor, family 2, subfamily T, member 29                  |
| 0,91 | CFH       | complement factor H                                                   |
| 0,91 | OR51H1    | olfactory receptor, family 51, subfamily H, member 1                  |
| 0,91 | ZBTB46    | zinc finger and BTB domain containing 46                              |

|      |                                     |                                                                                                       |
|------|-------------------------------------|-------------------------------------------------------------------------------------------------------|
| 0,91 | THSD4                               | thrombospondin type 1 domain containing 4                                                             |
| 0,91 | SERPINA2                            | serpin peptidase inhibitor, clade A (alpha-1 antiproteinase, antitrypsin), member 2 (gene/pseudogene) |
| 0,91 | IGDCC4                              | immunoglobulin superfamily, DCC subclass, member 4                                                    |
| 0,91 | OMP                                 | olfactory marker protein                                                                              |
| 0,91 | SPIN4                               | spindlin family, member 4                                                                             |
| 0,91 | JMJD7;<br>PLA2G4B;<br>JMJD7-PLA2G4B | jumonji domain containing 7; phospholipase A2, group IVB (cytosolic); JMJD7-PLA2G4B readthrough       |
| 0,91 | BACE1                               | beta-site APP-cleaving enzyme 1                                                                       |
| 0,91 | C19orf84                            | chromosome 19 open reading frame 84                                                                   |
| 0,91 | ZNF700                              | zinc finger protein 700                                                                               |
| 0,91 | SLC36A2                             | solute carrier family 36 (proton/amino acid symporter), member 2                                      |
| 0,91 | SPATA45                             | spermatogenesis associated 45                                                                         |
| 0,91 | MTA3                                | metastasis associated 1 family member 3                                                               |
| 0,91 | MAGI2                               | membrane associated guanylate kinase, WW and PDZ domain containing 2                                  |
| 0,91 | PIFO                                | primary cilia formation                                                                               |
| 0,91 | PPM1L                               | protein phosphatase, Mg <sup>2+</sup> /Mn <sup>2+</sup> dependent, 1L                                 |
| 0,91 | OXT                                 | oxytocin/neurophysin I prepropeptide                                                                  |
| 0,91 | GNPTAB                              | N-acetylglucosamine-1-phosphate transferase, alpha and beta subunits                                  |
| 0,91 | PCDH9                               | Memczak2013 ALT_ACCEPTOR, ALT_DONOR, coding, INTERNAL, intronic best transcript NM_203487             |
| 0,91 | GRB10                               | growth factor receptor bound protein 10                                                               |
| 0,91 | ATP6V1E2                            | ATPase, H <sup>+</sup> transporting, lysosomal 31kDa, V1 subunit E2                                   |
| 0,91 | CHRM3                               | cholinergic receptor, muscarinic 3                                                                    |
| 0,91 | FAM169B                             | family with sequence similarity 169, member B                                                         |
| 0,91 | B4GALT5                             | UDP-Gal:betaGlcNAc beta 1,4- galactosyltransferase, polypeptide 5                                     |
| 0,91 | SORCS3                              | sortilin-related VPS10 domain containing receptor 3                                                   |
| 0,91 | ARID3B                              | AT rich interactive domain 3B (BRIGHT-like)                                                           |
| 0,91 | RAB32                               | RAB32, member RAS oncogene family                                                                     |
| 0,91 | MS4A7                               | membrane-spanning 4-domains, subfamily A, member 7                                                    |
| 0,91 | SIRT5                               | sirtuin 5                                                                                             |
| 0,91 | ZFP37                               | ZFP37 zinc finger protein                                                                             |
| 0,91 | SDCCAG3                             | serologically defined colon cancer antigen 3                                                          |
| 0,91 | CEBPB                               | CCAAT/enhancer binding protein (C/EBP), beta                                                          |
| 0,91 | LGI3                                | leucine-rich repeat LGI family, member 3                                                              |
| 0,91 | REV1                                | REV1, DNA directed polymerase                                                                         |
| 0,91 | CHCHD6                              | coiled-coil-helix-coiled-coil-helix domain containing 6                                               |
| 0,91 | INPP4A                              | inositol polyphosphate-4-phosphatase type I A                                                         |
| 0,91 | E2F3                                | E2F transcription factor 3                                                                            |

|      |                       |                                                                                 |
|------|-----------------------|---------------------------------------------------------------------------------|
| 0,91 | PRLH                  | prolactin releasing hormone                                                     |
| 0,91 | CFI                   | complement factor I                                                             |
| 0,91 | SNTB2                 | syntrophin, beta 2 (dystrophin-associated protein A1, 59kDa, basic component 2) |
| 0,91 | TRIP12                | thyroid hormone receptor interactor 12                                          |
| 0,91 | EXOC3-AS1             | EXOC3 antisense RNA 1                                                           |
| 0,91 | ZNF596                | zinc finger protein 596                                                         |
| 0,91 | PRPF6                 | pre-mRNA processing factor 6                                                    |
| 0,91 | COL10A1               | collagen, type X, alpha 1                                                       |
| 0,91 | AFF2                  | AF4/FMR2 family, member 2                                                       |
| 0,91 | WAS                   | Wiskott-Aldrich syndrome                                                        |
| 0,91 | SPAG5                 | sperm associated antigen 5                                                      |
| 0,91 | UBXN11                | UBX domain protein 11                                                           |
| 0,91 | KCNK9                 | potassium channel, two pore domain subfamily K, member 9                        |
| 0,91 | RHBDL1                | rhomboid, veinlet-like 1 (Drosophila)                                           |
| 0,91 | GCNT4                 | glucosaminyl (N-acetyl) transferase 4, core 2                                   |
| 0,91 | HYOU1                 | hypoxia up-regulated 1                                                          |
| 0,91 | SH3GL3                | SH3-domain GRB2-like 3                                                          |
| 0,91 | DBNL; MIR6837         | drebrin-like; microRNA 6837                                                     |
| 0,91 | CDKN1A                | cyclin-dependent kinase inhibitor 1A (p21, Cip1)                                |
| 0,91 | TXLNA                 | taxilin alpha                                                                   |
| 0,91 | GCK                   | glucokinase (hexokinase 4)                                                      |
| 0,91 | RHOC                  | ras homolog family member C                                                     |
| 0,91 | GALK1                 | galactokinase 1                                                                 |
| 0,91 | ITPKC                 | inositol-trisphosphate 3-kinase C                                               |
| 0,91 | GPC1                  | glypican 1                                                                      |
| 0,91 | IFNA21                | interferon, alpha 21                                                            |
| 0,91 | TRIM43B               | tripartite motif containing 43B                                                 |
| 0,91 | ERMN                  | ermin                                                                           |
| 0,91 | OR4A47                | olfactory receptor, family 4, subfamily A, member 47                            |
| 0,91 | ARMCX6                | armadillo repeat containing, X-linked 6                                         |
| 0,91 | DEFB107B;<br>DEFB107A | defensin, beta 107B; defensin, beta 107A                                        |
| 0,91 | HIST1H1A              | histone cluster 1, H1a                                                          |
| 0,91 | OPTC                  | opticin                                                                         |
| 0,91 | LZTFL1                | leucine zipper transcription factor like 1                                      |
| 0,91 | OR6X1                 | olfactory receptor, family 6, subfamily X, member 1                             |
| 0,91 | TACO1                 | translational activator of mitochondrially encoded cytochrome c oxidase I       |
| 0,91 | ZNF573                | Transcript Identified by AceView, Entrez Gene ID(s) 126231                      |
| 0,91 | BCL9L                 | B-cell CLL/lymphoma 9-like                                                      |
| 0,91 | KSR1                  | kinase suppressor of ras 1                                                      |
| 0,91 | EMP2                  | epithelial membrane protein 2                                                   |
| 0,91 | DIAPH2                | diaphanous-related formin 2                                                     |
| 0,91 | TMEM214               | transmembrane protein 214                                                       |
| 0,91 | GNAZ                  | guanine nucleotide binding protein (G protein), alpha z polypeptide             |
| 0,91 | ADCY7                 | adenylate cyclase 7                                                             |

|      |                       |                                                                                        |
|------|-----------------------|----------------------------------------------------------------------------------------|
| 0,91 | ZNF141                | zinc finger protein 141                                                                |
| 0,91 | RIMKLA                | ribosomal modification protein rimK-like family member A                               |
| 0,91 | RSRC2                 | arginine/serine-rich coiled-coil 2                                                     |
| 0,91 | GPCPD1                | glycerophosphocholine phosphodiesterase 1                                              |
| 0,91 | LIMS2                 | LIM and senescent cell antigen-like domains 2                                          |
| 0,91 | IQUB                  | IQ motif and ubiquitin domain containing                                               |
| 0,91 | PLXND1                | plexin D1                                                                              |
| 0,91 | CXXC4                 | CXXC finger protein 4                                                                  |
| 0,91 | CNTN1                 | contactin 1                                                                            |
| 0,91 | DUS4L                 | dihydrouridine synthase 4-like                                                         |
| 0,91 | ATP6V1B1              | ATPase, H <sup>+</sup> transporting, lysosomal 56/58kDa, V1 subunit B1                 |
| 0,91 | OR52E8                | olfactory receptor, family 52, subfamily E, member 8                                   |
| 0,91 | CPSF4L                | cleavage and polyadenylation specific factor 4-like                                    |
| 0,91 | ARMC9                 | armadillo repeat containing 9                                                          |
| 0,91 | KMT2A                 | lysine (K)-specific methyltransferase 2A                                               |
| 0,91 | PRR23C                | proline rich 23C                                                                       |
| 0,91 | TCF20                 | transcription factor 20 (AR1)                                                          |
| 0,91 | TCF20                 | transcription factor 20 (AR1)                                                          |
| 0,91 | CXorf51A;<br>CXorf51B | chromosome X open reading frame 51A; chromosome X open reading frame 51B               |
| 0,91 | TSC22D4               | TSC22 domain family, member 4                                                          |
| 0,91 | TRPC1                 | transient receptor potential cation channel, subfamily C, member 1                     |
| 0,91 | C9orf135-AS1          | C9orf135 antisense RNA 1 (head to head)                                                |
| 0,91 | CCSAP                 | centriole, cilia and spindle-associated protein                                        |
| 0,91 | CRYAB                 | crystallin alpha B                                                                     |
| 0,91 | LCE1C                 | late cornified envelope 1C                                                             |
| 0,91 | PTAFR                 | platelet-activating factor receptor                                                    |
| 0,91 | C7orf76; SHFM1        | chromosome 7 open reading frame 76; split hand/foot malformation (ectrodactyly) type 1 |
| 0,91 | BUD31                 | BUD31 homolog                                                                          |
| 0,91 | C2orf73               | chromosome 2 open reading frame 73                                                     |
| 0,91 | SPATA25               | spermatogenesis associated 25                                                          |
| 0,91 | ZNF524                | zinc finger protein 524                                                                |
| 0,91 | HDX                   | highly divergent homeobox                                                              |
| 0,91 | MC3R                  | melanocortin 3 receptor                                                                |
| 0,91 | ACSL1                 | acyl-CoA synthetase long-chain family member 1                                         |
| 0,91 | CCNY                  | cyclin Y                                                                               |
| 0,91 | TPR                   | translocated promoter region, nuclear basket protein                                   |
| 0,91 | FBXO2                 | F-box protein 2                                                                        |
| 0,91 | MALSU1                | mitochondrial assembly of ribosomal large subunit 1                                    |
| 0,91 | TCTE1                 | t-complex-associated-testis-expressed 1                                                |
| 0,91 | CHIA                  | chitinase, acidic                                                                      |
| 0,91 | TCEB3B                | transcription elongation factor B polypeptide 3B (elongin A2)                          |
| 0,91 | CCDC74A               | coiled-coil domain containing 74A                                                      |
| 0,91 | OBSCN                 | obscurin, cytoskeletal calmodulin and titin-interacting RhoGEF                         |

|      |                     |                                                                                                    |
|------|---------------------|----------------------------------------------------------------------------------------------------|
| 0,91 | DENND2D             | DENN/MADD domain containing 2D                                                                     |
| 0,91 | MUM1                | melanoma associated antigen (mutated) 1                                                            |
| 0,91 | RNF7                | ring finger protein 7                                                                              |
| 0,91 | SMC5                | structural maintenance of chromosomes 5                                                            |
| 0,91 | LXN                 | latexin                                                                                            |
| 0,91 | RSPO3               | R-spondin 3                                                                                        |
| 0,91 | EPHA1               | EPH receptor A1                                                                                    |
| 0,91 | MBD3                | methyl-CpG binding domain protein 3                                                                |
| 0,91 | ABCD2               | Transcript Identified by AceView, Entrez Gene ID(s)<br>225                                         |
| 0,91 | CDON                | cell adhesion associated, oncogene regulated                                                       |
| 0,91 | SDC3                | syndecan 3                                                                                         |
| 0,91 | PANX3               | pannexin 3                                                                                         |
| 0,91 | UBE2S               | ubiquitin-conjugating enzyme E2S                                                                   |
| 0,91 | PAN2; CNPY2         | PAN2 poly(A) specific ribonuclease subunit; canopy<br>FGF signaling regulator 2                    |
| 0,91 | TMEM191B            | transmembrane protein 191B                                                                         |
| 0,91 | SMAD7               | Memczak2013 ALT_ACCEPTOR, ALT_DONOR,<br>coding, INTERNAL, intronic best transcript<br>NM_001190821 |
| 0,91 | MRPL52              | mitochondrial ribosomal protein L52                                                                |
| 0,91 | MACF1;<br>KIAA0754  | microtubule-actin crosslinking factor 1; KIAA0754                                                  |
| 0,91 | SHARPIN             | SHANK-associated RH domain interactor                                                              |
| 0,91 | ZBTB1               | zinc finger and BTB domain containing 1                                                            |
| 0,91 | EED; MIR6755        | embryonic ectoderm development; microRNA 6755                                                      |
| 0,91 | FCRLB               | Fc receptor-like B                                                                                 |
| 0,91 | UBE3D               | ubiquitin protein ligase E3D                                                                       |
| 0,91 | FBRSL1              | fibrosin-like 1                                                                                    |
| 0,91 | EFCAB13             | EF-hand calcium binding domain 13                                                                  |
| 0,91 | CCDC186;<br>MIR2110 | coiled-coil domain containing 186; microRNA 2110                                                   |
| 0,91 | POLR3GL             | polymerase (RNA) III (DNA directed) polypeptide G<br>(32kD)-like                                   |
| 0,91 | NTF3                | neurotrophin 3                                                                                     |
| 0,91 | PARP2               | poly(ADP-ribose) polymerase 2                                                                      |
| 0,91 | TAS2R5              | taste receptor, type 2, member 5                                                                   |
| 0,91 | EGLN1               | egl-9 family hypoxia-inducible factor 1                                                            |
| 0,91 | PPIAL4A             | peptidylprolyl isomerase A (cyclophilin A)-like 4A                                                 |
| 0,91 | ZNF710              | zinc finger protein 710                                                                            |
| 0,91 | OR5M8               | olfactory receptor, family 5, subfamily M, member 8                                                |
| 0,91 | CBFA2T2             | core-binding factor, runt domain, alpha subunit 2;<br>translocated to, 2                           |
| 0,91 | RRP7A               | ribosomal RNA processing 7 homolog A                                                               |
| 0,91 | PFDN4               | prefoldin subunit 4                                                                                |
| 0,91 | SEC16A              | SEC16 homolog A, endoplasmic reticulum export<br>factor                                            |
| 0,91 | SPINT2              | serine peptidase inhibitor, Kunitz type, 2                                                         |
| 0,91 | BPI                 | bactericidal/permeability-increasing protein                                                       |

|      |                        |                                                                                                        |
|------|------------------------|--------------------------------------------------------------------------------------------------------|
| 0,91 | RP5-1091N2.9;<br>IL2RG | Transcript Identified by AceView, Entrez Gene ID(s)<br>3561; putative novel transcript                 |
| 0,91 | FAM170A                | family with sequence similarity 170, member A                                                          |
| 0,91 | PKIA                   | protein kinase (cAMP-dependent, catalytic) inhibitor<br>alpha                                          |
| 0,91 | FAM46A                 | family with sequence similarity 46, member A                                                           |
| 0,91 | SYNE1                  | Memczak2013 ALT_ACCEPTOR, ALT_DONOR,<br>coding, INTERNAL, intronic best transcript<br>NM_033071        |
| 0,91 | OR10J5                 | olfactory receptor, family 10, subfamily J, member 5                                                   |
| 0,91 | CRIP2                  | cysteine-rich protein 2                                                                                |
| 0,91 | PRG2                   | proteoglycan 2, bone marrow (natural killer cell<br>activator, eosinophil granule major basic protein) |
| 0,91 | GGH                    | gamma-glutamyl hydrolase (conjugase,<br>folylpolygammaglutamyl hydrolase)                              |
| 0,91 | ANGPTL1                | angiopoietin like 1                                                                                    |
| 0,91 | KCNK4                  | potassium channel, two pore domain subfamily K,<br>member 4                                            |
| 0,91 | CD58                   | CD58 molecule                                                                                          |
| 0,91 | ACTL8                  | actin-like 8                                                                                           |
| 0,91 | PYCR2; MIR6741         | pyrroline-5-carboxylate reductase family, member 2;<br>microRNA 6741                                   |
| 0,91 | LACE1                  | lactation elevated 1                                                                                   |
| 0,91 | MFSD7                  | major facilitator superfamily domain containing 7                                                      |
| 0,91 | COL4A1                 | collagen, type IV, alpha 1                                                                             |
| 0,91 | STK35                  | serine/threonine kinase 35                                                                             |
| 0,91 | PNPLA1                 | patatin-like phospholipase domain containing 1                                                         |
| 0,91 | RANBP1                 | Zhang2013 ALT_ACCEPTOR, ALT_DONOR, coding,<br>INTERNAL, intronic best transcript NM_002882             |
| 0,91 | PRR22                  | proline rich 22                                                                                        |
| 0,91 | FOXN1                  | forkhead box N1                                                                                        |
| 0,91 | OTUD6B                 | OTU domain containing 6B                                                                               |
| 0,91 | ZSWIM5                 | zinc finger, SWIM-type containing 5                                                                    |
| 0,91 | CLPSL2                 | colipase-like 2                                                                                        |
| 0,91 | GRID1                  | glutamate receptor, ionotropic, delta 1                                                                |
| 0,91 | PCTP                   | phosphatidylcholine transfer protein                                                                   |
| 0,91 | TMEM79                 | transmembrane protein 79                                                                               |
| 0,91 | FAM73A                 | family with sequence similarity 73, member A                                                           |
| 0,91 | IL17RC                 | interleukin 17 receptor C                                                                              |
| 0,91 | ZC3H12D                | zinc finger CCCH-type containing 12D                                                                   |
| 0,91 | HYOU1                  | hypoxia up-regulated 1                                                                                 |
| 0,91 | PIN1                   | peptidylprolyl cis/trans isomerase, NIMA-interacting 1                                                 |
| 0,91 | ZNF282                 | zinc finger protein 282                                                                                |
| 0,91 | DCAF8L1                | DDB1 and CUL4 associated factor 8-like 1                                                               |
| 0,91 | AHNAK2                 | AHNAK nucleoprotein 2                                                                                  |
| 0,91 | RORA                   | RAR-related orphan receptor A                                                                          |
| 0,91 | IL1R2                  | interleukin 1 receptor, type II                                                                        |
| 0,91 | AP3S1                  | adaptor-related protein complex 3, sigma 1 subunit                                                     |

|      |                |                                                                                                                |
|------|----------------|----------------------------------------------------------------------------------------------------------------|
| 0,91 | HYOU1          | hypoxia up-regulated 1                                                                                         |
| 0,91 | C16orf86       | chromosome 16 open reading frame 86                                                                            |
| 0,91 | CXXC5          | CXXC finger protein 5                                                                                          |
| 0,91 | FAM179B        | family with sequence similarity 179, member B                                                                  |
| 0,91 | CCDC177        | coiled-coil domain containing 177                                                                              |
| 0,91 | BHLHE22        | basic helix-loop-helix family, member e22                                                                      |
| 0,91 | PRR21          | proline rich 21                                                                                                |
| 0,91 | ASAP3          | ArfGAP with SH3 domain, ankyrin repeat and PH domain 3                                                         |
| 0,91 | RCAN1          | regulator of calcineurin 1                                                                                     |
| 0,91 | SLC22A20       | solute carrier family 22, member 20                                                                            |
| 0,91 | AJAP1          | adherens junctions associated protein 1                                                                        |
| 0,91 | MS4A1          | membrane-spanning 4-domains, subfamily A, member 1                                                             |
| 0,91 | SLC10A4        | solute carrier family 10, member 4                                                                             |
| 0,91 | C12orf60       | chromosome 12 open reading frame 60                                                                            |
| 0,91 | UNC79          | unc-79 homolog (C. elegans)                                                                                    |
| 0,91 | HOXB2          | homeobox B2                                                                                                    |
| 0,91 | HIPK1          | Memczak2013 ALT_DONOR, coding, INTERNAL, intronic best transcript NM_198268                                    |
| 0,91 | goyborbu; MCM2 | Transcript Identified by AceView; Memczak2013 ANTISENSE, CDS, coding, INTERNAL, UTR3 best transcript NM_004526 |
| 0,91 | SNRK           | SNF related kinase                                                                                             |
| 0,91 | DDX5           | Memczak2013 ANTISENSE, CDS, coding, INTERNAL best transcript NM_004396                                         |
| 0,91 | AKR1E2         | aldo-keto reductase family 1, member E2                                                                        |
| 0,91 | GPSM2          | G-protein signaling modulator 2                                                                                |
| 0,91 | OR4C3          | olfactory receptor, family 4, subfamily C, member 3                                                            |
| 0,91 | ASPM           | abnormal spindle microtubule assembly                                                                          |
| 0,91 | SMKR1          | small lysine-rich protein 1                                                                                    |
| 0,91 | PHF10          | PHD finger protein 10                                                                                          |
| 0,91 | ZNF771         | zinc finger protein 771                                                                                        |
| 0,91 | ADH4           | alcohol dehydrogenase 4 (class II), pi polypeptide                                                             |
| 0,91 | PLCG2          | phospholipase C, gamma 2 (phosphatidylinositol-specific)                                                       |
| 0,91 | PLSCR2         | phospholipid scramblase 2                                                                                      |
| 0,91 | OR2AP1         | olfactory receptor, family 2, subfamily AP, member 1                                                           |
| 0,91 | QSOX2          | quiescin Q6 sulfhydryl oxidase 2                                                                               |
| 0,91 | SRA1           | steroid receptor RNA activator 1                                                                               |
| 0,91 | SIRT2          | sirtuin 2                                                                                                      |
| 0,91 | ECM2           | extracellular matrix protein 2, female organ and adipocyte specific                                            |
| 0,91 | MEIS3          | Meis homeobox 3                                                                                                |
| 0,91 | RBKS; BRE-AS1  | ribokinase; BRE antisense RNA 1                                                                                |
| 0,91 | ZFP91          | ZFP91 zinc finger protein                                                                                      |
| 0,91 | ARHGEF2        | Rho/Rac guanine nucleotide exchange factor 2                                                                   |
| 0,91 | RNF182         | ring finger protein 182                                                                                        |
| 0,91 | LARGE          | like-glycosyltransferase                                                                                       |
| 0,91 | SIK1           | salt-inducible kinase 1                                                                                        |

|      |            |                                                                                                   |
|------|------------|---------------------------------------------------------------------------------------------------|
| 0,91 | HSF5       | heat shock transcription factor family member 5                                                   |
| 0,91 | SESN3      | sestrin 3                                                                                         |
| 0,91 | AP4M1      | adaptor-related protein complex 4, mu 1 subunit                                                   |
| 0,91 | TEDDM1     | transmembrane epididymal protein 1                                                                |
| 0,91 | CDKN2C     | cyclin-dependent kinase inhibitor 2C (p18, inhibits CDK4)                                         |
| 0,91 | ITGB6      | integrin beta 6                                                                                   |
| 0,91 | PNMA2      | paraneoplastic Ma antigen 2                                                                       |
| 0,91 | SNAPIN     | SNAP-associated protein                                                                           |
| 0,91 | WBSCR16    | Williams-Beuren syndrome chromosome region 16                                                     |
| 0,91 | RPS6KA1    | ribosomal protein S6 kinase, 90kDa, polypeptide 1                                                 |
| 0,91 | VASH1      | vasohibin 1                                                                                       |
| 0,91 | C1orf53    | chromosome 1 open reading frame 53                                                                |
| 0,91 | NAT8L      | N-acetyltransferase 8-like (GCN5-related, putative)                                               |
| 0,91 | LITAF      | lipopolysaccharide-induced TNF factor                                                             |
| 0,91 | SLC6A20    | solute carrier family 6 (proline IMINO transporter), member 20                                    |
| 0,91 | DEFB135    | defensin, beta 135                                                                                |
| 0,91 | COBLL1     | cordon-bleu WH2 repeat protein like 1                                                             |
| 0,91 | C2orf71    | chromosome 2 open reading frame 71                                                                |
| 0,91 | TPD52      | tumor protein D52                                                                                 |
| 0,91 | STAT3      | signal transducer and activator of transcription 3 (acute-phase response factor)                  |
| 0,91 | HLA-DOB    | major histocompatibility complex, class II, DO beta                                               |
| 0,91 | CAPN12     | calpain 12                                                                                        |
| 0,91 | HBP1       | HMG-box transcription factor 1                                                                    |
| 0,91 | ANTXR1     | anthrax toxin receptor 1                                                                          |
| 0,91 | SLC25A42   | solute carrier family 25, member 42                                                               |
| 0,91 | APOA1      | apolipoprotein A-I                                                                                |
| 0,91 | FAM102B    | family with sequence similarity 102, member B                                                     |
| 0,91 | RNF181     | ring finger protein 181                                                                           |
| 0,91 | CNTRL      | centriolin                                                                                        |
| 0,91 | MPG        | N-methylpurine DNA glycosylase                                                                    |
| 0,91 | HSPA13     | heat shock protein 70kDa family, member 13                                                        |
| 0,91 | DAZ4; DAZ1 | deleted in azoospermia 4; deleted in azoospermia 1                                                |
| 0,91 | SAG        | S-antigen; retina and pineal gland (arrestin)                                                     |
| 0,91 | HS3ST1     | heparan sulfate (glucosamine) 3-O-sulfotransferase 1                                              |
| 0,91 | SMARCA5    | SWI/SNF related, matrix associated, actin dependent regulator of chromatin, subfamily a, member 5 |
| 0,91 | OPTN       | optineurin                                                                                        |
| 0,91 | CD1E       | CD1e molecule                                                                                     |
| 0,91 | LILRA6     | leukocyte immunoglobulin-like receptor, subfamily A (with TM domain), member 6                    |
| 0,91 | TMEM150A   | transmembrane protein 150A                                                                        |
| 0,91 | MYH10      | myosin, heavy chain 10, non-muscle                                                                |
| 0,91 | OR1L8      | olfactory receptor, family 1, subfamily L, member 8                                               |
| 0,91 | MYRIP      | myosin VIIA and Rab interacting protein                                                           |
| 0,91 | LONRF2     | LON peptidase N-terminal domain and ring finger 2                                                 |
| 0,91 | SLC10A6    | solute carrier family 10 (sodium/bile acid cotransporter), member 6                               |

|      |                         |                                                                                                  |
|------|-------------------------|--------------------------------------------------------------------------------------------------|
| 0,91 | NIPSNAP3A;<br>NIPSNAP3B | nipsnap homolog 3A (C. elegans); nipsnap homolog 3B (C. elegans)                                 |
| 0,91 | SERPINA13P              | serpin peptidase inhibitor, clade A (alpha-1 antiproteinase, antitrypsin), member 13, pseudogene |
| 0,91 | APOPT1                  | apoptogenic 1, mitochondrial                                                                     |
| 0,91 | TMEM133                 | transmembrane protein 133                                                                        |
| 0,91 | MVK                     | mevalonate kinase                                                                                |
| 0,91 | NAV2                    | neuron navigator 2                                                                               |
| 0,91 | SUPT3H                  | SPT3 homolog, SAGA and STAGA complex component                                                   |
| 0,91 | APAF1                   | apoptotic peptidase activating factor 1                                                          |
| 0,91 | DZIP3                   | DAZ interacting zinc finger protein 3                                                            |
| 0,91 | GGT7                    | gamma-glutamyltransferase 7                                                                      |
| 0,91 | MBTPS1                  | membrane bound transcription factor peptidase, site 1                                            |
| 0,91 | CATSPER4                | cation channel, sperm associated 4                                                               |
| 0,91 | SEMA3F                  | sema domain, immunoglobulin domain (Ig), short basic domain, secreted, (semaphorin) 3F           |
| 0,91 | TRIB3                   | tribbles pseudokinase 3                                                                          |
| 0,91 | OR5AN1                  | olfactory receptor, family 5, subfamily AN, member 1                                             |
| 0,91 | SLC8B1                  | solute carrier family 8 (sodium/lithium/calcium exchanger), member B1                            |
| 0,91 | FAM3B                   | family with sequence similarity 3, member B                                                      |
| 0,91 | TEAD2                   | TEA domain family member 2                                                                       |
| 0,91 | PPIC                    | peptidylprolyl isomerase C (cyclophilin C)                                                       |
| 0,91 | IL24                    | interleukin 24                                                                                   |
| 0,91 | GBX1                    | gastrulation brain homeobox 1                                                                    |
| 0,91 | RABGAP1L                | RAB GTPase activating protein 1-like                                                             |
| 0,91 | PFKL                    | phosphofructokinase, liver                                                                       |
| 0,91 | HGF                     | hepatocyte growth factor (hepapoietin A; scatter factor)                                         |
| 0,91 | MSLN                    | mesothelin                                                                                       |
| 0,91 | SLX4IP                  | SLX4 interacting protein                                                                         |
| 0,91 | SDPR                    | serum deprivation response                                                                       |
| 0,91 | GOLGA6L22               | golgin A6 family-like 22                                                                         |
| 0,91 | BTBD17                  | BTB (POZ) domain containing 17                                                                   |
| 0,91 | LRRTM1                  | leucine rich repeat transmembrane neuronal 1                                                     |
| 0,91 | FABP6                   | fatty acid binding protein 6, ileal                                                              |
| 0,91 | CGB1                    | chorionic gonadotropin, beta polypeptide 1                                                       |
| 0,91 | EFNB3                   | ephrin-B3                                                                                        |
| 0,91 | SGCZ                    | sarcoglycan zeta                                                                                 |
| 0,91 | NUMA1                   | nuclear mitotic apparatus protein 1                                                              |
| 0,91 | AADAC                   | arylacetamide deacetylase                                                                        |
| 0,91 | CSN3                    | casein kappa                                                                                     |
| 0,91 | UGT2A3                  | UDP glucuronosyltransferase 2 family, polypeptide A3                                             |
| 0,91 | GPR84                   | G protein-coupled receptor 84                                                                    |
| 0,91 | RPS6KA1                 | ribosomal protein S6 kinase, 90kDa, polypeptide 1                                                |
| 0,91 | TCAP                    | titin-cap                                                                                        |
| 0,91 | ADAT1                   | adenosine deaminase, tRNA-specific 1                                                             |

|      |                             |                                                                                                                                                                                                              |
|------|-----------------------------|--------------------------------------------------------------------------------------------------------------------------------------------------------------------------------------------------------------|
| 0,91 | IRF7                        | interferon regulatory factor 7                                                                                                                                                                               |
| 0,91 | MON2                        | MON2 homolog, regulator of endosome-to-Golgi trafficking                                                                                                                                                     |
| 0,91 | KRTAP3-2                    | keratin associated protein 3-2                                                                                                                                                                               |
| 0,91 | CHIT1                       | chitinase 1 (chitotriosidase)                                                                                                                                                                                |
| 0,91 | FGB                         | fibrinogen beta chain                                                                                                                                                                                        |
| 0,91 | PGM1                        | phosphoglucomutase 1                                                                                                                                                                                         |
| 0,91 | SAP30                       | Sin3A associated protein 30kDa                                                                                                                                                                               |
| 0,91 | HP09025; CTD-2116F7.1       | uncharacterized LOC100652929; novel transcript; uncharacterized LOC100652929 [Source:EntrezGene;Acc:100652929]                                                                                               |
| 0,91 | GPR137C                     | G protein-coupled receptor 137C                                                                                                                                                                              |
| 0,91 | OR4M2; AC171558.2           | Homo sapiens olfactory receptor, family 4, subfamily M, member 2 (OR4M2), mRNA.; Homo sapiens olfactory receptor, family 4, subfamily M, member 2, mRNA (cDNA clone MGC:168600 IMAGE:9020977), complete cds. |
| 0,91 | MALRD1                      | MAM and LDL receptor class A domain containing 1                                                                                                                                                             |
| 0,91 | KIAA0141                    | KIAA0141                                                                                                                                                                                                     |
| 0,91 | PIGX                        | phosphatidylinositol glycan anchor biosynthesis class X                                                                                                                                                      |
| 0,91 | ACTR3C                      | ARP3 actin-related protein 3 homolog C (yeast)                                                                                                                                                               |
| 0,91 | KRT72                       | keratin 72, type II                                                                                                                                                                                          |
| 0,91 | ZNF592                      | zinc finger protein 592                                                                                                                                                                                      |
| 0,91 | NBPF20                      | neuroblastoma breakpoint family, member 20                                                                                                                                                                   |
| 0,91 | RHCE                        | Rh blood group, CcEe antigens                                                                                                                                                                                |
| 0,91 | OR4F5                       | olfactory receptor, family 4, subfamily F, member 5                                                                                                                                                          |
| 0,91 | FAM47E; FAM47E-STBD1; STBD1 | family with sequence similarity 47, member E; FAM47E-STBD1 readthrough; starch binding domain 1                                                                                                              |
| 0,91 | BNIP1                       | BCL2/adenovirus E1B 19kDa interacting protein 1                                                                                                                                                              |
| 0,91 | FBXL20                      | F-box and leucine-rich repeat protein 20                                                                                                                                                                     |
| 0,91 | MTSS1                       | metastasis suppressor 1                                                                                                                                                                                      |
| 0,91 | TTC7B                       | tetratricopeptide repeat domain 7B                                                                                                                                                                           |
| 0,91 | SLC7A7                      | solute carrier family 7 (amino acid transporter light chain, y+L system), member 7                                                                                                                           |
| 0,91 | OR51B2                      | olfactory receptor, family 51, subfamily B, member 2 (gene/pseudogene)                                                                                                                                       |
| 0,91 | EGR3                        | early growth response 3                                                                                                                                                                                      |
| 0,91 | SPACA3                      | sperm acrosome associated 3                                                                                                                                                                                  |
| 0,91 | KRTAP25-1                   | keratin associated protein 25-1                                                                                                                                                                              |
| 0,91 | JADE3                       | jade family PHD finger 3                                                                                                                                                                                     |
| 0,91 | AGPAT4                      | Transcript Identified by AceView, Entrez Gene ID(s) 56895                                                                                                                                                    |
| 0,91 | BIRC5                       | baculoviral IAP repeat containing 5                                                                                                                                                                          |
| 0,91 | TIAF1; MYO18A               | TGFB1-induced anti-apoptotic factor 1; myosin XVIII A                                                                                                                                                        |
| 0,91 | LRRC75A                     | leucine rich repeat containing 75A                                                                                                                                                                           |
| 0,91 | FIGLA                       | folliculogenesis specific bHLH transcription factor                                                                                                                                                          |
| 0,91 | EXOC3L4                     | exocyst complex component 3-like 4                                                                                                                                                                           |
| 0,91 | FBLIM1                      | filamin binding LIM protein 1                                                                                                                                                                                |

|      |                                |                                                                                |
|------|--------------------------------|--------------------------------------------------------------------------------|
| 0,91 | PEX26                          | peroxisomal biogenesis factor 26                                               |
| 0,91 | CNIH2                          | cornichon family AMPA receptor auxiliary protein 2                             |
| 0,91 | GAN; MIR4720                   | gigaxonin; microRNA 4720                                                       |
| 0,91 | KCNA10                         | potassium channel, voltage gated shaker related subfamily A, member 10         |
| 0,91 | CASP7                          | caspase 7                                                                      |
| 0,91 | RAB8B                          | RAB8B, member RAS oncogene family                                              |
| 0,91 | LOC730159;<br>RP11-360D2.1     | uncharacterized LOC730159; putative novel transcript                           |
| 0,91 | FER                            | fer (fps/fes related) tyrosine kinase                                          |
| 0,91 | CLGN                           | calmegin                                                                       |
| 0,91 | CCL4L2;<br>CCL4L1              | chemokine (C-C motif) ligand 4-like 2; chemokine (C-C motif) ligand 4-like 1   |
| 0,91 | POLR2F;<br>MIR4534;<br>MIR6820 | polymerase (RNA) II (DNA directed) polypeptide F; microRNA 4534; microRNA 6820 |
| 0,91 | B3GNT8                         | UDP-GlcNAc:betaGal beta-1,3-N-acetylglucosaminyltransferase 8                  |
| 0,91 | RRBP1                          | ribosome binding protein 1                                                     |
| 0,91 | MAN2B2                         | mannosidase, alpha, class 2B, member 2                                         |
| 0,91 | MTCL1                          | microtubule crosslinking factor 1                                              |
| 0,90 | EMC7                           | ER membrane protein complex subunit 7                                          |
| 0,90 | PLA2G3                         | phospholipase A2, group III                                                    |
| 0,90 | CARNS1                         | carnosine synthase 1                                                           |
| 0,90 | S100A2                         | S100 calcium binding protein A2                                                |
| 0,90 | PPIP5K1                        | diphosphoinositol pentakisphosphate kinase 1                                   |
| 0,90 | PSMG4                          | proteasome (prosome, macropain) assembly chaperone 4                           |
| 0,90 | ARFGAP2                        | ADP-ribosylation factor GTPase activating protein 2                            |
| 0,90 | FMN1                           | formin 1                                                                       |
| 0,90 | TCF20                          | transcription factor 20 (AR1)                                                  |
| 0,90 | TCF20                          | transcription factor 20 (AR1)                                                  |
| 0,90 | CEP350                         | centrosomal protein 350kDa                                                     |
| 0,90 | PKDCC                          | protein kinase domain containing, cytoplasmic                                  |
| 0,90 | LILRA5                         | Memczak2013 ANTISENSE, coding, INTERNAL, intronic best transcript NM_181985    |
| 0,90 | KIAA1671                       | KIAA1671                                                                       |
| 0,90 | MUS81                          | MUS81 structure-specific endonuclease subunit                                  |
| 0,90 | PRTN3                          | proteinase 3                                                                   |
| 0,90 | COG4                           | component of oligomeric golgi complex 4                                        |
| 0,90 | MRPL17                         | mitochondrial ribosomal protein L17                                            |
| 0,90 | C22orf42                       | chromosome 22 open reading frame 42                                            |
| 0,90 | LMNA                           | lamin A/C                                                                      |
| 0,90 | MTERF4                         | mitochondrial transcription termination factor 4                               |
| 0,90 | SFXN4                          | sideroflexin 4                                                                 |
| 0,90 | TRIM40                         | tripartite motif containing 40                                                 |
| 0,90 | DCTN3                          | dynactin 3 (p22)                                                               |
| 0,90 | FAM162A                        | family with sequence similarity 162, member A                                  |
| 0,90 | MAP3K12                        | mitogen-activated protein kinase kinase kinase 12                              |
| 0,90 | ARPC5L                         | actin related protein 2/3 complex subunit 5-like                               |

|      |                 |                                                                                         |
|------|-----------------|-----------------------------------------------------------------------------------------|
| 0,90 | RPL7A           | ribosomal protein L7a                                                                   |
| 0,90 | KRTAP4-4        | keratin associated protein 4-4                                                          |
| 0,90 | ANKRD36         | ankyrin repeat domain 36                                                                |
| 0,90 | AGPAT4-IT1      | AGPAT4 intronic transcript 1                                                            |
| 0,90 | INSIG2          | insulin induced gene 2                                                                  |
| 0,90 | CXADR           | coxsackie virus and adenovirus receptor                                                 |
| 0,90 | CHSY1           | chondroitin sulfate synthase 1                                                          |
| 0,90 | VKORC1          | vitamin K epoxide reductase complex subunit 1                                           |
| 0,90 | ZHX1-C8orf76    | ZHX1-C8orf76 readthrough                                                                |
| 0,90 | DNMBP           | dynamin binding protein                                                                 |
| 0,90 | ZNF385C         | zinc finger protein 385C                                                                |
| 0,90 | HMOX1           | heme oxygenase 1                                                                        |
| 0,90 | URB1            | URB1 ribosome biogenesis 1 homolog (S. cerevisiae)                                      |
| 0,90 | TPCN2           | two pore segment channel 2                                                              |
| 0,90 | OR5T3           | olfactory receptor, family 5, subfamily T, member 3                                     |
| 0,90 | AQP12B          | aquaporin 12B                                                                           |
| 0,90 | ADAP2           | ArfGAP with dual PH domains 2                                                           |
| 0,90 | PNLDC1          | poly(A)-specific ribonuclease (PARN)-like domain containing 1                           |
| 0,90 | ZNF239          | zinc finger protein 239                                                                 |
| 0,90 | GNG11           | guanine nucleotide binding protein (G protein), gamma 11                                |
| 0,90 | OOEP            | oocyte expressed protein                                                                |
| 0,90 | SCRIB           | Memczak2013 ANTISENSE, CDS, coding, INTERNAL best transcript NM_015356                  |
| 0,90 | HAUS1           | HAUS augmin like complex subunit 1                                                      |
| 0,90 | CBX5; MIR3198-2 | chromobox homolog 5; microRNA 3198-2                                                    |
| 0,90 | MKNK2           | MAP kinase interacting serine/threonine kinase 2                                        |
| 0,90 | MUC7            | mucin 7, secreted                                                                       |
| 0,90 | RRH             | retinal pigment epithelium-derived rhodopsin homolog                                    |
| 0,90 | CEBPA           | CCAAT/enhancer binding protein (C/EBP), alpha                                           |
| 0,90 | SPTLC1          | Transcript Identified by AceView, Entrez Gene ID(s) 10558                               |
| 0,90 | EPHA8           | EPH receptor A8                                                                         |
| 0,90 | COPG1           | coatomer protein complex subunit gamma 1                                                |
| 0,90 | VWA5B1          | von Willebrand factor A domain containing 5B1                                           |
| 0,90 | MSL1            | male-specific lethal 1 homolog (Drosophila)                                             |
| 0,90 | PIK3R1          | phosphoinositide-3-kinase, regulatory subunit 1 (alpha)                                 |
| 0,90 | COQ2            | coenzyme Q2 4-hydroxybenzoate polyprenyltransferase                                     |
| 0,90 | FDXR            | Zhang2013 ALT_ACCEPTOR, ALT_DONOR, coding, INTERNAL, intronic best transcript NM_004110 |
| 0,90 | KRT34           | keratin 34, type I                                                                      |
| 0,90 | NBR1            | neighbor of BRCA1 gene 1                                                                |
| 0,90 | GRIK1           | glutamate receptor, ionotropic, kainate 1                                               |
| 0,90 | LPA             | lipoprotein, Lp(a)                                                                      |
| 0,90 | CERK            | ceramide kinase                                                                         |

|      |                   |                                                                     |
|------|-------------------|---------------------------------------------------------------------|
| 0,90 | SMC1A             | structural maintenance of chromosomes 1A                            |
| 0,90 | DUX4              | double homeobox 4                                                   |
| 0,90 | ADPRHL1           | ADP-ribosylhydrolase like 1                                         |
| 0,90 | CACHD1            | cache domain containing 1                                           |
| 0,90 | PPIH              | peptidylprolyl isomerase H (cyclophilin H)                          |
| 0,90 | RLIM              | ring finger protein, LIM domain interacting                         |
| 0,90 | SH3PXD2A          | SH3 and PX domains 2A                                               |
| 0,90 | GAS2L1            | growth arrest-specific 2 like 1                                     |
| 0,90 | CLEC14A           | C-type lectin domain family 14, member A                            |
| 0,90 | SH3BGRL           | SH3 domain binding glutamate-rich protein like                      |
| 0,90 | TBL2              | transducin (beta)-like 2                                            |
| 0,90 | CHD6              | chromodomain helicase DNA binding protein 6                         |
| 0,90 | THY1              | Thy-1 cell surface antigen                                          |
| 0,90 | TAOK1;<br>MIR4523 | TAO kinase 1; microRNA 4523                                         |
| 0,90 | GBF1              | golgi brefeldin A resistant guanine nucleotide exchange factor 1    |
| 0,90 | PPP2R5B           | protein phosphatase 2, regulatory subunit B, beta                   |
| 0,90 | NLRP7             | NLR family, pyrin domain containing 7                               |
| 0,90 | NUDCD3            | NudC domain containing 3                                            |
| 0,90 | RALGAPA1          | Ral GTPase activating protein, alpha subunit 1 (catalytic)          |
| 0,90 | APOBEC3G          | apolipoprotein B mRNA editing enzyme, catalytic polypeptide-like 3G |
| 0,90 | HADH              | hydroxyacyl-CoA dehydrogenase                                       |
| 0,90 | TLR2              | toll-like receptor 2                                                |
| 0,90 | C1orf174          | chromosome 1 open reading frame 174                                 |
| 0,90 | NIPBL             | Nipped-B homolog (Drosophila)                                       |
| 0,90 | BCL2L14           | BCL2-like 14 (apoptosis facilitator)                                |
| 0,90 | MYO5C             | myosin VC                                                           |
| 0,90 | AKR1D1            | aldo-keto reductase family 1, member D1                             |
| 0,90 | ABHD16A           | abhydrolase domain containing 16A                                   |
| 0,90 | TMEM106A          | transmembrane protein 106A                                          |
| 0,90 | KIF17             | kinesin family member 17                                            |
| 0,90 | MEI1              | meiotic double-stranded break formation protein 1                   |
| 0,90 | AKAP3             | A kinase (PRKA) anchor protein 3                                    |
| 0,90 | FAT2              | FAT atypical cadherin 2                                             |
| 0,90 | OVOL2             | ovo-like zinc finger 2                                              |
| 0,90 | TCF20             | transcription factor 20 (AR1)                                       |
| 0,90 | TCF20             | transcription factor 20 (AR1)                                       |
| 0,90 | RD3               | retinal degeneration 3                                              |
| 0,90 | HRAS              | Harvey rat sarcoma viral oncogene homolog                           |
| 0,90 | C5orf67           | chromosome 5 open reading frame 67                                  |
| 0,90 | NFRKB             | Transcript Identified by AceView, Entrez Gene ID(s) 4798            |
| 0,90 | FCAR              | Fc fragment of IgA receptor                                         |
| 0,90 | PRRC2B            | proline-rich coiled-coil 2B                                         |
| 0,90 | C16orf89          | chromosome 16 open reading frame 89                                 |
| 0,90 | KRTAP9-7          | keratin associated protein 9-7                                      |
| 0,90 | SLC16A11          | solute carrier family 16, member 11                                 |

|      |                        |                                                                                                                                                                                                                                                              |
|------|------------------------|--------------------------------------------------------------------------------------------------------------------------------------------------------------------------------------------------------------------------------------------------------------|
| 0,90 | C11orf86               | chromosome 11 open reading frame 86                                                                                                                                                                                                                          |
| 0,90 | OLFML2A                | olfactomedin like 2A                                                                                                                                                                                                                                         |
| 0,90 | GDPD1                  | glycerophosphodiester phosphodiesterase domain containing 1                                                                                                                                                                                                  |
| 0,90 | POMZP3                 | POM121 and ZP3 fusion                                                                                                                                                                                                                                        |
| 0,90 | SETD2                  | SET domain containing 2                                                                                                                                                                                                                                      |
| 0,90 | H2AFJ                  | H2A histone family, member J                                                                                                                                                                                                                                 |
| 0,90 | TCAF1                  | TRPM8 channel-associated factor 1                                                                                                                                                                                                                            |
| 0,90 | DGCR6;<br>LOC102724770 | Homo sapiens DiGeorge syndrome critical region gene 6 (DGCR6), mRNA.; protein DGCR6; Homo sapiens DiGeorge syndrome critical region gene 6, mRNA (cDNA clone MGC:54086 IMAGE:5229172), complete cds.; Protein DGCR6 [Source:UniProtKB/Swiss-Prot;Acc:Q14129] |
| 0,90 | C12orf57; RNU7-1       | chromosome 12 open reading frame 57; RNA, U7 small nuclear 1                                                                                                                                                                                                 |
| 0,90 | NEK6                   | NIMA-related kinase 6                                                                                                                                                                                                                                        |
| 0,90 | FNDC4                  | fibronectin type III domain containing 4                                                                                                                                                                                                                     |
| 0,90 | KRT8                   | keratin 8, type II                                                                                                                                                                                                                                           |
| 0,90 | DCT                    | dopachrome tautomerase                                                                                                                                                                                                                                       |
| 0,90 | CCDC88A                | coiled-coil domain containing 88A                                                                                                                                                                                                                            |
| 0,90 | BARHL1                 | BarH-like homeobox 1                                                                                                                                                                                                                                         |
| 0,90 | TMEM262                | transmembrane protein 262                                                                                                                                                                                                                                    |
| 0,90 | FOXJ2                  | forkhead box J2                                                                                                                                                                                                                                              |
| 0,90 | CLEC11A                | C-type lectin domain family 11, member A                                                                                                                                                                                                                     |
| 0,90 | OR52N4                 | olfactory receptor, family 52, subfamily N, member 4 (gene/pseudogene)                                                                                                                                                                                       |
| 0,90 | LRP4                   | LDL receptor related protein 4                                                                                                                                                                                                                               |
| 0,90 | PRKY                   | protein kinase, Y-linked, pseudogene                                                                                                                                                                                                                         |
| 0,90 | ZNF546                 | zinc finger protein 546                                                                                                                                                                                                                                      |
| 0,90 | ZNF474                 | zinc finger protein 474                                                                                                                                                                                                                                      |
| 0,90 | DOCK4                  | dedicator of cytokinesis 4                                                                                                                                                                                                                                   |
| 0,90 | MGST3                  | microsomal glutathione S-transferase 3                                                                                                                                                                                                                       |
| 0,90 | CHRNA4                 | cholinergic receptor, nicotinic beta 4                                                                                                                                                                                                                       |
| 0,90 | C6orf120               | chromosome 6 open reading frame 120                                                                                                                                                                                                                          |
| 0,90 | HTR3B                  | 5-hydroxytryptamine (serotonin) receptor 3B, ionotropic                                                                                                                                                                                                      |
| 0,90 | RPL26L1                | ribosomal protein L26-like 1                                                                                                                                                                                                                                 |
| 0,90 | C1orf101               | chromosome 1 open reading frame 101                                                                                                                                                                                                                          |
| 0,90 | MIB1                   | mindbomb E3 ubiquitin protein ligase 1                                                                                                                                                                                                                       |
| 0,90 | ZUFSP                  | zinc finger with UFM1-specific peptidase domain                                                                                                                                                                                                              |
| 0,90 | TSSK2                  | testis-specific serine kinase 2                                                                                                                                                                                                                              |
| 0,90 | CACTIN-AS1             | CACTIN antisense RNA 1                                                                                                                                                                                                                                       |
| 0,90 | GPR155                 | G protein-coupled receptor 155                                                                                                                                                                                                                               |
| 0,90 | KIAA1328               | KIAA1328                                                                                                                                                                                                                                                     |
| 0,90 | COA3                   | cytochrome c oxidase assembly factor 3                                                                                                                                                                                                                       |
| 0,90 | SAMHD1                 | SAM domain and HD domain 1                                                                                                                                                                                                                                   |
| 0,90 | PNPLA8                 | patatin-like phospholipase domain containing 8                                                                                                                                                                                                               |
| 0,90 | C11orf1                | chromosome 11 open reading frame 1                                                                                                                                                                                                                           |
| 0,90 | FAM122A                | family with sequence similarity 122A                                                                                                                                                                                                                         |

|      |           |                                                                                         |
|------|-----------|-----------------------------------------------------------------------------------------|
| 0,90 | MOV10     | Mov10 RISC complex RNA helicase                                                         |
| 0,90 | KRTAP5-10 | keratin associated protein 5-10                                                         |
| 0,90 | LPXN      | leupaxin                                                                                |
| 0,90 | GYPC      | glycophorin C (Gerbich blood group)                                                     |
| 0,90 | ZNF655    | zinc finger protein 655                                                                 |
| 0,90 | METTL22   | methyltransferase like 22                                                               |
| 0,90 | MYCBPAP   | MYCBP associated protein                                                                |
| 0,90 | BAZ2B     | bromodomain adjacent to zinc finger domain 2B                                           |
| 0,90 | RPS6KA1   | ribosomal protein S6 kinase, 90kDa, polypeptide 1                                       |
| 0,90 | HMBS      | hydroxymethylbilane synthase                                                            |
| 0,90 | GRM6      | glutamate receptor, metabotropic 6                                                      |
| 0,90 | PGLYRP1   | peptidoglycan recognition protein 1                                                     |
| 0,90 | OR4N4     | olfactory receptor, family 4, subfamily N, member 4                                     |
| 0,90 | PTDSS2    | phosphatidylserine synthase 2                                                           |
| 0,90 | TPBGL     | trophoblast glycoprotein-like                                                           |
| 0,90 | TMED9     | transmembrane p24 trafficking protein 9                                                 |
| 0,90 | TAF6L     | TAF6-like RNA polymerase II, p300/CBP-associated factor (PCAF)-associated factor, 65kDa |
| 0,90 | ZNF441    | zinc finger protein 441                                                                 |
| 0,90 | GNLY      | granulysin                                                                              |
| 0,90 | ITPKB     | Transcript Identified by AceView, Entrez Gene ID(s)<br>3707                             |
| 0,90 | C5orf42   | chromosome 5 open reading frame 42                                                      |
| 0,90 | TULP4     | tubby like protein 4                                                                    |
| 0,90 | BLOC1S5   | biogenesis of lysosomal organelles complex-1, subunit<br>5, muted                       |
| 0,90 | ZNF334    | zinc finger protein 334                                                                 |
| 0,90 | NCF4      | neutrophil cytosolic factor 4                                                           |
| 0,90 | NPIA1     | nuclear pore complex interacting protein family,<br>member A1                           |
| 0,90 | IL20RB    | interleukin 20 receptor beta                                                            |
| 0,90 | KRT37     | keratin 37, type I                                                                      |
| 0,90 | PRDM6     | PR domain containing 6                                                                  |
| 0,90 | SF3B5     | splicing factor 3b subunit 5                                                            |
| 0,90 | RNF150    | ring finger protein 150                                                                 |
| 0,90 | CEP170    | centrosomal protein 170kDa                                                              |
| 0,90 | TCTEX1D2  | Tctex1 domain containing 2                                                              |
| 0,90 | DSPP      | dentin sialophosphoprotein                                                              |
| 0,90 | NLRC5     | NLR family, CARD domain containing 5                                                    |
| 0,90 | VRK2      | vaccinia related kinase 2                                                               |
| 0,90 | MAMSTR    | MEF2 activating motif and SAP domain containing<br>transcriptional regulator            |
| 0,90 | HEBP2     | heme binding protein 2                                                                  |
| 0,90 | KMT2E     | lysine (K)-specific methyltransferase 2E                                                |
| 0,90 | HOMER2    | homer scaffolding protein 2                                                             |
| 0,90 | HCRTR1    | hypocretin (orexin) receptor 1                                                          |
| 0,90 | COQ5      | coenzyme Q5, methyltransferase                                                          |
| 0,90 | JMJD4     | jumonji domain containing 4                                                             |
| 0,90 | CD27      | CD27 molecule                                                                           |
| 0,90 | ENKD1     | enkurin domain containing 1                                                             |

|      |                                             |                                                                                                                                                                                                                                                                           |
|------|---------------------------------------------|---------------------------------------------------------------------------------------------------------------------------------------------------------------------------------------------------------------------------------------------------------------------------|
| 0,90 | KLHL22                                      | kelch-like family member 22                                                                                                                                                                                                                                               |
| 0,90 | LOC102724238;<br>LOC554249;<br>RP11-111F5.4 | Homo sapiens uncharacterized LOC102724238 (LOC102724238), long non-coding RNA.; Homo sapiens uncharacterized LOC554249 (LOC554249), long non-coding RNA.; Homo sapiens hypothetical LOC554249, mRNA (cDNA clone MGC:99799 IMAGE:6378300), complete cds.; novel transcript |
| 0,90 | OR10A7                                      | olfactory receptor, family 10, subfamily A, member 7                                                                                                                                                                                                                      |
| 0,90 | PCBP3                                       | poly(rC) binding protein 3                                                                                                                                                                                                                                                |
| 0,90 | F12                                         | coagulation factor XII (Hageman factor)                                                                                                                                                                                                                                   |
| 0,90 | C9orf66                                     | chromosome 9 open reading frame 66                                                                                                                                                                                                                                        |
| 0,90 | C8orf44                                     | chromosome 8 open reading frame 44                                                                                                                                                                                                                                        |
| 0,90 | CBWD6;<br>CBWD5;<br>CBWD7                   | COBW domain containing 6; COBW domain containing 5; COBW domain containing 7                                                                                                                                                                                              |
| 0,90 | SHROOM3                                     | shroom family member 3                                                                                                                                                                                                                                                    |
| 0,90 | USP54                                       | ubiquitin specific peptidase 54                                                                                                                                                                                                                                           |
| 0,90 | GLYATL1                                     | glycine-N-acyltransferase-like 1                                                                                                                                                                                                                                          |
| 0,90 | GZMK                                        | granzyme K                                                                                                                                                                                                                                                                |
| 0,90 | SP5                                         | Sp5 transcription factor                                                                                                                                                                                                                                                  |
| 0,90 | LCP2                                        | lymphocyte cytosolic protein 2                                                                                                                                                                                                                                            |
| 0,90 | OR10T2                                      | olfactory receptor, family 10, subfamily T, member 2                                                                                                                                                                                                                      |
| 0,90 | LINC01561                                   | long intergenic non-protein coding RNA 1561                                                                                                                                                                                                                               |
| 0,90 | MASTL                                       | microtubule associated serine/threonine kinase-like                                                                                                                                                                                                                       |
| 0,90 | ADCY8                                       | adenylate cyclase 8 (brain)                                                                                                                                                                                                                                               |
| 0,90 | MTHFD1L                                     | methylenetetrahydrofolate dehydrogenase (NADP+ dependent) 1-like                                                                                                                                                                                                          |
| 0,90 | PGP                                         | phosphoglycolate phosphatase                                                                                                                                                                                                                                              |
| 0,90 | PRDX5                                       | peroxiredoxin 5                                                                                                                                                                                                                                                           |
| 0,90 | PARD6A                                      | par-6 family cell polarity regulator alpha                                                                                                                                                                                                                                |
| 0,90 | KRTAP5-2                                    | keratin associated protein 5-2                                                                                                                                                                                                                                            |
| 0,90 | FCGBP                                       | Fc fragment of IgG binding protein                                                                                                                                                                                                                                        |
| 0,90 | PRDM8                                       | PR domain containing 8                                                                                                                                                                                                                                                    |
| 0,90 | KRT26                                       | keratin 26, type I                                                                                                                                                                                                                                                        |
| 0,90 | CCDC81                                      | coiled-coil domain containing 81                                                                                                                                                                                                                                          |
| 0,90 | FKTN                                        | fukutin                                                                                                                                                                                                                                                                   |
| 0,90 | NFIX                                        | nuclear factor I/X (CCAAT-binding transcription factor)                                                                                                                                                                                                                   |
| 0,90 | GPN3                                        | GPN-loop GTPase 3                                                                                                                                                                                                                                                         |
| 0,90 | ICOS                                        | inducible T-cell co-stimulator                                                                                                                                                                                                                                            |
| 0,90 | GATA5                                       | GATA binding protein 5                                                                                                                                                                                                                                                    |
| 0,90 | PTGER3                                      | prostaglandin E receptor 3 (subtype EP3)                                                                                                                                                                                                                                  |
| 0,90 | ZNF582                                      | zinc finger protein 582                                                                                                                                                                                                                                                   |
| 0,90 | AMN1                                        | antagonist of mitotic exit network 1 homolog                                                                                                                                                                                                                              |
| 0,90 | CNTNAP3P2;<br>CNTNAP3                       | contactin associated protein-like 3 pseudogene 2;<br>contactin associated protein-like 3                                                                                                                                                                                  |
| 0,90 | STK32B                                      | serine/threonine kinase 32B                                                                                                                                                                                                                                               |
| 0,90 | ZNF619                                      | zinc finger protein 619                                                                                                                                                                                                                                                   |
| 0,90 | HOXB5                                       | homeobox B5                                                                                                                                                                                                                                                               |

|      |                                                                                                 |                                                                                                                                                                                                                                                                                                                                                                                                                                                                                                                |
|------|-------------------------------------------------------------------------------------------------|----------------------------------------------------------------------------------------------------------------------------------------------------------------------------------------------------------------------------------------------------------------------------------------------------------------------------------------------------------------------------------------------------------------------------------------------------------------------------------------------------------------|
| 0,90 | UGT1A1;<br>UGT1A6;<br>UGT1A4;<br>UGT1A10;<br>UGT1A8;<br>UGT1A7;<br>UGT1A5;<br>UGT1A3;<br>UGT1A9 | UDP glucuronosyltransferase 1 family, polypeptide A1;<br>UDP glucuronosyltransferase 1 family, polypeptide A6;<br>UDP glucuronosyltransferase 1 family, polypeptide A4;<br>UDP glucuronosyltransferase 1 family, polypeptide A10; UDP glucuronosyltransferase 1 family, polypeptide A8; UDP glucuronosyltransferase 1 family, polypeptide A7; UDP glucuronosyltransferase 1 family, polypeptide A5; UDP glucuronosyltransferase 1 family, polypeptide A3; UDP glucuronosyltransferase 1 family, polypeptide A9 |
| 0,90 | STON2                                                                                           | stonin 2                                                                                                                                                                                                                                                                                                                                                                                                                                                                                                       |
| 0,90 | EXT1                                                                                            | exostosin glycosyltransferase 1                                                                                                                                                                                                                                                                                                                                                                                                                                                                                |
| 0,90 | CENPJ                                                                                           | centromere protein J                                                                                                                                                                                                                                                                                                                                                                                                                                                                                           |
| 0,90 | PMVK                                                                                            | phosphomevalonate kinase                                                                                                                                                                                                                                                                                                                                                                                                                                                                                       |
| 0,90 | NFXL1                                                                                           | nuclear transcription factor, X-box binding-like 1                                                                                                                                                                                                                                                                                                                                                                                                                                                             |
| 0,90 | ERLIN2                                                                                          | ER lipid raft associated 2                                                                                                                                                                                                                                                                                                                                                                                                                                                                                     |
| 0,90 | RNASE13                                                                                         | ribonuclease, RNase A family, 13 (non-active)                                                                                                                                                                                                                                                                                                                                                                                                                                                                  |
| 0,90 | AFF4                                                                                            | AF4/FMR2 family, member 4                                                                                                                                                                                                                                                                                                                                                                                                                                                                                      |
| 0,90 | KRTAP5-4                                                                                        | keratin associated protein 5-4                                                                                                                                                                                                                                                                                                                                                                                                                                                                                 |
| 0,90 | ENTPD8                                                                                          | ectonucleoside triphosphate diphosphohydrolase 8                                                                                                                                                                                                                                                                                                                                                                                                                                                               |
| 0,90 | SMCHD1                                                                                          | structural maintenance of chromosomes flexible hinge domain containing 1                                                                                                                                                                                                                                                                                                                                                                                                                                       |
| 0,90 | TPRG1                                                                                           | tumor protein p63 regulated 1                                                                                                                                                                                                                                                                                                                                                                                                                                                                                  |
| 0,90 | PTH                                                                                             | parathyroid hormone                                                                                                                                                                                                                                                                                                                                                                                                                                                                                            |
| 0,90 | APBB1IP                                                                                         | amyloid beta (A4) precursor protein-binding, family B, member 1 interacting protein                                                                                                                                                                                                                                                                                                                                                                                                                            |
| 0,90 | PER3                                                                                            | period circadian clock 3                                                                                                                                                                                                                                                                                                                                                                                                                                                                                       |
| 0,90 | TDRD9                                                                                           | tudor domain containing 9                                                                                                                                                                                                                                                                                                                                                                                                                                                                                      |
| 0,90 | VPS4A                                                                                           | vacuolar protein sorting 4 homolog A ( <i>S. cerevisiae</i> )                                                                                                                                                                                                                                                                                                                                                                                                                                                  |
| 0,90 | KIF14                                                                                           | kinesin family member 14                                                                                                                                                                                                                                                                                                                                                                                                                                                                                       |
| 0,90 | ARG2                                                                                            | arginase 2                                                                                                                                                                                                                                                                                                                                                                                                                                                                                                     |
| 0,90 | TLN2                                                                                            | talin 2                                                                                                                                                                                                                                                                                                                                                                                                                                                                                                        |
| 0,90 | SLC25A47                                                                                        | solute carrier family 25, member 47                                                                                                                                                                                                                                                                                                                                                                                                                                                                            |
| 0,90 | NDST1                                                                                           | N-deacetylase/N-sulfotransferase (heparan glucosaminyl) 1                                                                                                                                                                                                                                                                                                                                                                                                                                                      |
| 0,90 | SLC17A4                                                                                         | solute carrier family 17, member 4                                                                                                                                                                                                                                                                                                                                                                                                                                                                             |
| 0,90 | ROBO1                                                                                           | roundabout guidance receptor 1                                                                                                                                                                                                                                                                                                                                                                                                                                                                                 |
| 0,90 | DEFB114                                                                                         | defensin, beta 114                                                                                                                                                                                                                                                                                                                                                                                                                                                                                             |
| 0,90 | MFSD6                                                                                           | major facilitator superfamily domain containing 6                                                                                                                                                                                                                                                                                                                                                                                                                                                              |
| 0,90 | PTPN21                                                                                          | protein tyrosine phosphatase, non-receptor type 21                                                                                                                                                                                                                                                                                                                                                                                                                                                             |
| 0,90 | SLC25A35                                                                                        | solute carrier family 25, member 35                                                                                                                                                                                                                                                                                                                                                                                                                                                                            |
| 0,90 | THYN1                                                                                           | thymocyte nuclear protein 1                                                                                                                                                                                                                                                                                                                                                                                                                                                                                    |
| 0,90 | HIST1H3A                                                                                        | histone cluster 1, H3a                                                                                                                                                                                                                                                                                                                                                                                                                                                                                         |
| 0,90 | SLC2A13                                                                                         | solute carrier family 2 (facilitated glucose transporter), member 13                                                                                                                                                                                                                                                                                                                                                                                                                                           |
| 0,90 | ZFPL1                                                                                           | zinc finger protein-like 1                                                                                                                                                                                                                                                                                                                                                                                                                                                                                     |
| 0,90 | SGOL1                                                                                           | shugoshin-like 1 ( <i>S. pombe</i> )                                                                                                                                                                                                                                                                                                                                                                                                                                                                           |
| 0,90 | PARPBP                                                                                          | PARP1 binding protein                                                                                                                                                                                                                                                                                                                                                                                                                                                                                          |
| 0,90 | CNP                                                                                             | 2,3-cyclic nucleotide 3 phosphodiesterase                                                                                                                                                                                                                                                                                                                                                                                                                                                                      |

|      |               |                                                                                                |
|------|---------------|------------------------------------------------------------------------------------------------|
| 0,90 | RNF151        | ring finger protein 151                                                                        |
| 0,90 | ZGPAT; LIME1  | zinc finger, CCH-type with G-patch domain; Lck interacting transmembrane adaptor 1             |
| 0,90 | FASN          | fatty acid synthase                                                                            |
| 0,90 | VWA3B         | von Willebrand factor A domain containing 3B                                                   |
| 0,90 | KIF1C         | kinesin family member 1C                                                                       |
| 0,90 | NDUFA10       | NADH dehydrogenase (ubiquinone) 1 alpha subcomplex, 10, 42kDa                                  |
| 0,90 | MICAL3        | microtubule associated monooxygenase, calponin and LIM domain containing 3                     |
| 0,90 | FLOT1         | Transcript Identified by AceView, Entrez Gene ID(s) 10211                                      |
| 0,90 | ATRNL1        | attractin-like 1                                                                               |
| 0,90 | ZNF274        | zinc finger protein 274                                                                        |
| 0,90 | STPG2         | sperm-tail PG-rich repeat containing 2                                                         |
| 0,90 | IGIP          | IgA-inducing protein                                                                           |
| 0,90 | SEPHS1        | selenophosphate synthetase 1                                                                   |
| 0,90 | TPD52L1       | tumor protein D52-like 1                                                                       |
| 0,90 | TRAPPC13      | trafficking protein particle complex 13                                                        |
| 0,90 | CDCA5         | cell division cycle associated 5                                                               |
| 0,90 | GFAP          | glial fibrillary acidic protein                                                                |
| 0,90 | ABCD1         | ATP binding cassette subfamily D member 1                                                      |
| 0,90 | DYRK1B        | dual specificity tyrosine-(Y)-phosphorylation regulated kinase 1B                              |
| 0,90 | ITPRIP        | inositol 1,4,5-trisphosphate receptor interacting protein                                      |
| 0,90 | RFPL3         | ret finger protein-like 3                                                                      |
| 0,90 | KLHL4         | kelch-like family member 4                                                                     |
| 0,90 | VIMP          | VCP-interacting membrane selenoprotein                                                         |
| 0,90 | LINC01276     | long intergenic non-protein coding RNA 1276                                                    |
| 0,90 | MEFV          | Mediterranean fever                                                                            |
| 0,90 | VPS26B        | VPS26 retromer complex component B                                                             |
| 0,90 | CCDC82        | coiled-coil domain containing 82                                                               |
| 0,90 | ZW10          | zw10 kinetochore protein                                                                       |
| 0,90 | HAND1         | heart and neural crest derivatives expressed 1                                                 |
| 0,90 | FGF20         | fibroblast growth factor 20                                                                    |
| 0,90 | BMP8B         | bone morphogenetic protein 8b                                                                  |
| 0,90 | PIK3R2; IFI30 | phosphoinositide-3-kinase, regulatory subunit 2 (beta); interferon, gamma-inducible protein 30 |
| 0,90 | SHCBP1L       | SHC SH2-domain binding protein 1-like                                                          |
| 0,90 | ACADVL        | acyl-CoA dehydrogenase, very long chain                                                        |
| 0,90 | SKI           | SKI proto-oncogene                                                                             |
| 0,90 | P3H1          | prolyl 3-hydroxylase 1                                                                         |
| 0,90 | GHSR          | growth hormone secretagogue receptor                                                           |
| 0,90 | MAP2K2        | mitogen-activated protein kinase kinase 2                                                      |
| 0,90 | MARC1         | mitochondrial amidoxime reducing component 1                                                   |
| 0,90 | CPT1B         | carnitine palmitoyltransferase 1B (muscle)                                                     |
| 0,90 | HEBP1         | heme binding protein 1                                                                         |
| 0,90 | HCK           | HCK proto-oncogene, Src family tyrosine kinase                                                 |
| 0,90 | ANKRD18B      | ankyrin repeat domain 18B                                                                      |

|      |                           |                                                                                                         |
|------|---------------------------|---------------------------------------------------------------------------------------------------------|
| 0,90 | TRIM6-TRIM34              | TRIM6-TRIM34 readthrough                                                                                |
| 0,90 | KDF1                      | keratinocyte differentiation factor 1                                                                   |
| 0,90 | KRTAP2-1                  | keratin associated protein 2-1                                                                          |
| 0,90 | CUBN                      | cubilin (intrinsic factor-cobalamin receptor)                                                           |
| 0,90 | SLC6A18                   | solute carrier family 6 (neutral amino acid transporter), member 18                                     |
| 0,90 | UHRF1BP1                  | UHRF1 binding protein 1                                                                                 |
| 0,90 | APOBEC3B                  | apolipoprotein B mRNA editing enzyme, catalytic polypeptide-like 3B                                     |
| 0,90 | TLR9                      | toll-like receptor 9                                                                                    |
| 0,90 | NOD1                      | nucleotide-binding oligomerization domain containing 1                                                  |
| 0,90 | ROCK2                     | Rho-associated, coiled-coil containing protein kinase 2                                                 |
| 0,90 | DENND5A                   | DENN/MADD domain containing 5A                                                                          |
| 0,90 | RPS3A                     | Zhang2013 ALT_DONOR, coding, INTERNAL, intronic best transcript NM_001006                               |
| 0,90 | NBN                       | Transcript Identified by AceView, Entrez Gene ID(s) 4683                                                |
| 0,90 | FAM208A                   | family with sequence similarity 208, member A                                                           |
| 0,90 | PARVB                     | parvin, beta                                                                                            |
| 0,90 | TMEM220                   | transmembrane protein 220                                                                               |
| 0,90 | RERG                      | RAS-like, estrogen-regulated, growth inhibitor                                                          |
| 0,90 | ZCCHC14                   | zinc finger, CCHC domain containing 14                                                                  |
| 0,90 | RIN2                      | Transcript Identified by AceView, Entrez Gene ID(s) 54453                                               |
| 0,90 | HLA-L                     | major histocompatibility complex, class I, L (pseudogene)                                               |
| 0,90 | PLCD3                     | phospholipase C, delta 3                                                                                |
| 0,90 | DNAI2                     | dynein, axonemal, intermediate chain 2                                                                  |
| 0,90 | FAM200A                   | family with sequence similarity 200, member A                                                           |
| 0,90 | AGL                       | amylo-alpha-1, 6-glucosidase, 4-alpha-glucanotransferase                                                |
| 0,90 | WNT3                      | wingless-type MMTV integration site family, member 3                                                    |
| 0,90 | CUL4A                     | Memczak2013 ALT_ACCEPTOR, ALT_DONOR, coding, INTERNAL, intronic best transcript NM_001008895            |
| 0,90 | CORO7; PAM16; CORO7-PAM16 | coronin 7; presequence translocase-associated motor 16 homolog (S. cerevisiae); CORO7-PAM16 readthrough |
| 0,90 | MZT2B                     | mitotic spindle organizing protein 2B                                                                   |
| 0,90 | NDUFA10                   | NADH dehydrogenase (ubiquinone) 1 alpha subcomplex, 10, 42kDa                                           |
| 0,90 | HMBS                      | hydroxymethylbilane synthase                                                                            |
| 0,90 | HR                        | hair growth associated                                                                                  |
| 0,90 | CMC1                      | C-x(9)-C motif containing 1                                                                             |
| 0,90 | ARHGEF33                  | Rho guanine nucleotide exchange factor 33                                                               |
| 0,90 | HPSE2                     | heparanase 2 (inactive)                                                                                 |
| 0,90 | WWC3                      | WWC family member 3                                                                                     |
| 0,90 | SMC2                      | structural maintenance of chromosomes 2                                                                 |

|      |                                           |                                                                                                                                                                             |
|------|-------------------------------------------|-----------------------------------------------------------------------------------------------------------------------------------------------------------------------------|
| 0,90 | MNS1                                      | meiosis-specific nuclear structural 1                                                                                                                                       |
| 0,90 | TUBGCP2                                   | tubulin, gamma complex associated protein 2                                                                                                                                 |
| 0,90 | ZSWIM7                                    | zinc finger, SWIM-type containing 7                                                                                                                                         |
| 0,90 | TCEB3CL2;<br>TCEB3CL                      | transcription elongation factor B polypeptide 3C-like 2;<br>transcription elongation factor B polypeptide 3C-like                                                           |
| 0,90 | PRKAR1A;<br>ARSG                          | protein kinase, cAMP-dependent, regulatory, type I,<br>alpha; arylsulfatase G                                                                                               |
| 0,90 | ZBP1                                      | Z-DNA binding protein 1                                                                                                                                                     |
| 0,90 | TICAM1                                    | toll-like receptor adaptor molecule 1                                                                                                                                       |
| 0,90 | MUC20;<br>SDHAP2;<br>MIR570;<br>LINC00969 | mucin 20, cell surface associated; succinate<br>dehydrogenase complex subunit A, flavoprotein<br>pseudogene 2; microRNA 570; long intergenic non-<br>protein coding RNA 969 |
| 0,90 | FBXL19                                    | F-box and leucine-rich repeat protein 19                                                                                                                                    |
| 0,90 | OR2T5                                     | olfactory receptor, family 2, subfamily T, member 5                                                                                                                         |
| 0,90 | WFDC9                                     | WAP four-disulfide core domain 9                                                                                                                                            |
| 0,90 | SAMD1                                     | sterile alpha motif domain containing 1                                                                                                                                     |
| 0,90 | VGLL4                                     | vestigial-like family member 4                                                                                                                                              |
| 0,90 | ABHD17C                                   | abhydrolase domain containing 17C                                                                                                                                           |
| 0,90 | NOTCH2NL                                  | notch 2 N-terminal like                                                                                                                                                     |
| 0,90 | TP73                                      | tumor protein p73                                                                                                                                                           |
| 0,90 | PLEKHA1                                   | pleckstrin homology domain containing, family A<br>(phosphoinositide binding specific) member 1                                                                             |
| 0,90 | OR1E2                                     | olfactory receptor, family 1, subfamily E, member 2                                                                                                                         |
| 0,90 | HLA-A                                     | major histocompatibility complex, class I, A                                                                                                                                |
| 0,90 | DDIAS                                     | DNA damage-induced apoptosis suppressor                                                                                                                                     |
| 0,90 | WDR87                                     | WD repeat domain 87                                                                                                                                                         |
| 0,90 | PSMC4                                     | proteasome 26S subunit, ATPase 4 [Source:HGNC<br>Symbol;Acc:HGNC:9551]                                                                                                      |
| 0,90 | COL1A2                                    | collagen, type I, alpha 2                                                                                                                                                   |
| 0,90 | TRAF7                                     | TNF receptor-associated factor 7, E3 ubiquitin protein<br>ligase                                                                                                            |
| 0,90 | SH3D19                                    | SH3 domain containing 19                                                                                                                                                    |
| 0,90 | CASC4                                     | cancer susceptibility candidate 4                                                                                                                                           |
| 0,90 | CLDN8                                     | claudin 8                                                                                                                                                                   |
| 0,90 | CFHR2                                     | complement factor H-related 2                                                                                                                                               |
| 0,90 | TIMM9                                     | translocase of inner mitochondrial membrane 9<br>homolog (yeast)                                                                                                            |
| 0,90 | ST8SIA6                                   | ST8 alpha-N-acetyl-neuraminide alpha-2,8-<br>sialyltransferase 6                                                                                                            |
| 0,90 | GPR32                                     | G protein-coupled receptor 32                                                                                                                                               |
| 0,90 | HOXD8                                     | homeobox D8                                                                                                                                                                 |
| 0,90 | NEMP2                                     | nuclear envelope integral membrane protein 2                                                                                                                                |
| 0,90 | NEIL2                                     | nei-like DNA glycosylase 2                                                                                                                                                  |
| 0,90 | LOXL3                                     | lysyl oxidase-like 3                                                                                                                                                        |
| 0,90 | UBE2J2                                    | ubiquitin-conjugating enzyme E2, J2                                                                                                                                         |
| 0,90 | CLDN18                                    | claudin 18                                                                                                                                                                  |
| 0,90 | FANCG                                     | Fanconi anemia complementation group G                                                                                                                                      |
| 0,90 | ICAM5                                     | intercellular adhesion molecule 5                                                                                                                                           |

|      |                                                                         |                                                                                                                          |
|------|-------------------------------------------------------------------------|--------------------------------------------------------------------------------------------------------------------------|
| 0,90 | IFT43                                                                   | intraflagellar transport 43                                                                                              |
| 0,90 | EPHX3                                                                   | epoxide hydrolase 3                                                                                                      |
| 0,90 | MIR17HG;<br>MIR17; MIR18A;<br>MIR19A;<br>MIR19B1;<br>MIR20A;<br>MIR92A1 | miR-17-92 cluster host gene; microRNA 17;<br>microRNA 18a; microRNA 19a; microRNA 19b-1;<br>microRNA 20a; microRNA 92a-1 |
| 0,90 | TSHZ3                                                                   | teashirt zinc finger homeobox 3                                                                                          |
| 0,90 | MMAB                                                                    | methylmalonic aciduria (cobalamin deficiency) cblB<br>type                                                               |
| 0,90 | BCL2L14                                                                 | BCL2-like 14 (apoptosis facilitator)                                                                                     |
| 0,90 | C2orf68                                                                 | chromosome 2 open reading frame 68                                                                                       |
| 0,90 | NOL4L                                                                   | nucleolar protein 4-like                                                                                                 |
| 0,90 | GOLGA8B                                                                 | golgin A8 family, member B                                                                                               |
| 0,90 | WASF2                                                                   | Memczak2013 ANTISENSE, coding, INTERNAL,<br>intronic best transcript NM_006990                                           |
| 0,90 | BLOC1S1-RDH5;<br>RP11-644F5.10                                          | BLOC1S1-RDH5 readthrough; Uncharacterized protein<br>[Source:UniProtKB/TrEMBL;Acc:F8VNQ1]                                |
| 0,90 | MYOCD                                                                   | myocardin                                                                                                                |
| 0,90 | OR10G7                                                                  | olfactory receptor, family 10, subfamily G, member 7                                                                     |
| 0,90 | FBXL17                                                                  | F-box and leucine-rich repeat protein 17                                                                                 |
| 0,90 | CCDC24                                                                  | coiled-coil domain containing 24                                                                                         |
| 0,90 | SYT12                                                                   | synaptotagmin XII                                                                                                        |
| 0,90 | CYP2C9                                                                  | cytochrome P450, family 2, subfamily C, polypeptide 9                                                                    |
| 0,90 | CAMK1D                                                                  | calcium/calmodulin-dependent protein kinase ID                                                                           |
| 0,90 | PSME2;<br>MIR7703                                                       | proteasome activator subunit 2; microRNA 7703                                                                            |
| 0,90 | NHLRC4; PIGQ                                                            | NHL repeat containing 4; phosphatidylinositol glycan<br>anchor biosynthesis class Q                                      |
| 0,90 | THNSL2                                                                  | threonine synthase-like 2                                                                                                |
| 0,90 | TBC1D2                                                                  | TBC1 domain family, member 2                                                                                             |
| 0,90 | HIST1H1D                                                                | histone cluster 1, H1d                                                                                                   |
| 0,90 | PTPN22                                                                  | protein tyrosine phosphatase, non-receptor type 22<br>(lymphoid)                                                         |
| 0,90 | VPS39                                                                   | vacuolar protein sorting 39 homolog (S. cerevisiae)                                                                      |
| 0,90 | ETFB                                                                    | electron-transfer-flavoprotein, beta polypeptide                                                                         |
| 0,90 | MYH15                                                                   | myosin, heavy chain 15                                                                                                   |
| 0,90 | OR8G2                                                                   | olfactory receptor, family 8, subfamily G, member 2                                                                      |
| 0,90 | UBXN2A                                                                  | UBX domain protein 2A                                                                                                    |
| 0,90 | LOC100129520                                                            | testis expressed sequence 13-like                                                                                        |

|      |                     |                                                                                                                                                                                                                                                                                                                                                                                                                                                                                                                                                                                                                                                                                                                                                                                                                                                                         |
|------|---------------------|-------------------------------------------------------------------------------------------------------------------------------------------------------------------------------------------------------------------------------------------------------------------------------------------------------------------------------------------------------------------------------------------------------------------------------------------------------------------------------------------------------------------------------------------------------------------------------------------------------------------------------------------------------------------------------------------------------------------------------------------------------------------------------------------------------------------------------------------------------------------------|
| 0,90 | CD99                | Homo sapiens CD99 molecule (CD99), transcript variant 2, mRNA.; Homo sapiens CD99 molecule (CD99), transcript variant 3, mRNA.; Homo sapiens CD99 molecule (CD99), transcript variant 1, mRNA.; CD99 molecule [Source:HGNC Symbol;Acc:HGNC:7082]; Homo sapiens CD99 molecule, mRNA (cDNA clone MGC:2282 IMAGE:3161673), complete cds.; Homo sapiens CD99 molecule, mRNA (cDNA clone MGC:3938 IMAGE:2906143), complete cds.; Homo sapiens CD99 molecule, mRNA (cDNA clone MGC:19734 IMAGE:3606974), complete cds.; Homo sapiens CD99 molecule, mRNA (cDNA clone MGC:4214 IMAGE:2957883), complete cds.; Homo sapiens CD99 molecule, mRNA (cDNA clone MGC:14521 IMAGE:4094268), complete cds.; Salzman2013 ANNOTATED, CDS, coding, INTERNAL, OVCODE, OVEXON best transcript NM_002414; Salzman2013 ANNOTATED, CDS, coding, OVCODE, OVEXON, UTR3 best transcript NM_002414 |
| 0,90 | NFAT5               | nuclear factor of activated T-cells 5, tonicity-responsive                                                                                                                                                                                                                                                                                                                                                                                                                                                                                                                                                                                                                                                                                                                                                                                                              |
| 0,90 | LOXL1               | lysyl oxidase-like 1                                                                                                                                                                                                                                                                                                                                                                                                                                                                                                                                                                                                                                                                                                                                                                                                                                                    |
| 0,90 | NTSR1               | neurotensin receptor 1 (high affinity)                                                                                                                                                                                                                                                                                                                                                                                                                                                                                                                                                                                                                                                                                                                                                                                                                                  |
| 0,90 | LOC100652768; PCSK7 | uncharacterized LOC100652768; Salzman2013 ANNOTATED, ncRNA, OVCODE, OVERLAPTX, OVEXON best transcript NR_045215; Transcript Identified by AceView, Entrez Gene ID(s) 9159                                                                                                                                                                                                                                                                                                                                                                                                                                                                                                                                                                                                                                                                                               |
| 0,90 | TMEM132D            | transmembrane protein 132D                                                                                                                                                                                                                                                                                                                                                                                                                                                                                                                                                                                                                                                                                                                                                                                                                                              |
| 0,90 | ABHD17A             | abhydrolase domain containing 17A                                                                                                                                                                                                                                                                                                                                                                                                                                                                                                                                                                                                                                                                                                                                                                                                                                       |
| 0,90 | LRP2                | LDL receptor related protein 2                                                                                                                                                                                                                                                                                                                                                                                                                                                                                                                                                                                                                                                                                                                                                                                                                                          |
| 0,90 | NPIP6               | nuclear pore complex interacting protein family, member B6                                                                                                                                                                                                                                                                                                                                                                                                                                                                                                                                                                                                                                                                                                                                                                                                              |
| 0,90 | NRG3                | neuregulin 3                                                                                                                                                                                                                                                                                                                                                                                                                                                                                                                                                                                                                                                                                                                                                                                                                                                            |
| 0,90 | CEACAM4             | carcinoembryonic antigen-related cell adhesion molecule 4                                                                                                                                                                                                                                                                                                                                                                                                                                                                                                                                                                                                                                                                                                                                                                                                               |
| 0,90 | TMEM245             | transmembrane protein 245                                                                                                                                                                                                                                                                                                                                                                                                                                                                                                                                                                                                                                                                                                                                                                                                                                               |
| 0,90 | GALNT11             | polypeptide N-acetylgalactosaminyltransferase 11                                                                                                                                                                                                                                                                                                                                                                                                                                                                                                                                                                                                                                                                                                                                                                                                                        |
| 0,90 | MUC19               | mucin 19, oligomeric                                                                                                                                                                                                                                                                                                                                                                                                                                                                                                                                                                                                                                                                                                                                                                                                                                                    |
| 0,90 | PPP1R16A            | protein phosphatase 1, regulatory subunit 16A                                                                                                                                                                                                                                                                                                                                                                                                                                                                                                                                                                                                                                                                                                                                                                                                                           |
| 0,90 | DUT                 | deoxyuridine triphosphatase                                                                                                                                                                                                                                                                                                                                                                                                                                                                                                                                                                                                                                                                                                                                                                                                                                             |
| 0,90 | ABHD4               | abhydrolase domain containing 4                                                                                                                                                                                                                                                                                                                                                                                                                                                                                                                                                                                                                                                                                                                                                                                                                                         |
| 0,90 | FARP1; MIR3170      | FERM, ARH/RhoGEF and pleckstrin domain protein 1; microRNA 3170                                                                                                                                                                                                                                                                                                                                                                                                                                                                                                                                                                                                                                                                                                                                                                                                         |
| 0,90 | PLEKHM2             | pleckstrin homology domain containing, family M (with RUN domain) member 2                                                                                                                                                                                                                                                                                                                                                                                                                                                                                                                                                                                                                                                                                                                                                                                              |
| 0,90 | NKAPL               | NFKB activating protein-like                                                                                                                                                                                                                                                                                                                                                                                                                                                                                                                                                                                                                                                                                                                                                                                                                                            |
| 0,90 | RBMS1; MIR4785      | RNA binding motif, single stranded interacting protein 1; microRNA 4785                                                                                                                                                                                                                                                                                                                                                                                                                                                                                                                                                                                                                                                                                                                                                                                                 |
| 0,90 | TMEM203             | transmembrane protein 203                                                                                                                                                                                                                                                                                                                                                                                                                                                                                                                                                                                                                                                                                                                                                                                                                                               |

|      |                      |                                                                                           |
|------|----------------------|-------------------------------------------------------------------------------------------|
| 0,90 | TMEM107;<br>SNORD118 | transmembrane protein 107; small nucleolar RNA, C/D box 118                               |
| 0,90 | MED12                | mediator complex subunit 12                                                               |
| 0,90 | OR4X1                | olfactory receptor, family 4, subfamily X, member 1 (gene/pseudogene)                     |
| 0,90 | CNN1                 | calponin 1, basic, smooth muscle                                                          |
| 0,90 | RAB26                | RAB26, member RAS oncogene family                                                         |
| 0,90 | KHDRBS3              | KH domain containing, RNA binding, signal transduction associated 3                       |
| 0,90 | PDZK1                | PDZ domain containing 1                                                                   |
| 0,90 | TTC39A               | tetratricopeptide repeat domain 39A                                                       |
| 0,90 | PDCD5                | programmed cell death 5                                                                   |
| 0,90 | AASS                 | aminoadipate-semialdehyde synthase                                                        |
| 0,90 | WISP2                | WNT1 inducible signaling pathway protein 2                                                |
| 0,90 | LZTR1                | leucine-zipper-like transcription regulator 1                                             |
| 0,90 | SLPI                 | secretory leukocyte peptidase inhibitor                                                   |
| 0,90 | NT5DC4               | 5-nucleotidase domain containing 4                                                        |
| 0,90 | LMO1                 | LIM domain only 1 (rhombotin 1)                                                           |
| 0,90 | ZNF2                 | zinc finger protein 2                                                                     |
| 0,90 | ago-02               | argonaute RISC catalytic component 2                                                      |
| 0,90 | TSC2                 | tuberous sclerosis 2                                                                      |
| 0,90 | PRR14L               | proline rich 14-like                                                                      |
| 0,90 | CADM4                | cell adhesion molecule 4                                                                  |
| 0,90 | MYO1H                | myosin IH                                                                                 |
| 0,90 | LRRC8B               | leucine rich repeat containing 8 family, member B                                         |
| 0,90 | SAMD14               | sterile alpha motif domain containing 14                                                  |
| 0,90 | HIST1H3C             | histone cluster 1, H3c                                                                    |
| 0,90 | SLITRK1              | SLIT and NTRK-like family, member 1                                                       |
| 0,90 | TRHDE-AS1            | TRHDE antisense RNA 1                                                                     |
| 0,90 | SH3BP5               | SH3-domain binding protein 5 (BTK-associated)                                             |
| 0,90 | AKAP7                | A kinase (PRKA) anchor protein 7                                                          |
| 0,90 | CD72                 | CD72 molecule                                                                             |
| 0,90 | MROH9                | maestro heat-like repeat family member 9                                                  |
| 0,90 | NEK2                 | NIMA-related kinase 2                                                                     |
| 0,90 | KIF15                | kinesin family member 15                                                                  |
| 0,90 | KLHDC3               | kelch domain containing 3                                                                 |
| 0,90 | DNAJC6               | DnaJ (Hsp40) homolog, subfamily C, member 6                                               |
| 0,90 | PAIP2B               | poly(A) binding protein interacting protein 2B                                            |
| 0,90 | PALM2                | paralemmin 2                                                                              |
| 0,90 | RELL1                | RELT-like 1                                                                               |
| 0,90 | DCAF7                | DDB1 and CUL4 associated factor 7                                                         |
| 0,90 | NECAB2               | N-terminal EF-hand calcium binding protein 2                                              |
| 0,90 | C22orf15             | chromosome 22 open reading frame 15                                                       |
| 0,90 | ASNA1                | arsA arsenite transporter, ATP-binding, homolog 1 (bacterial)                             |
| 0,90 | AXIN1                | Memczak2013 ALT_ACCEPTOR, ALT_DONOR, coding, INTERNAL, intronic best transcript NM_003502 |
| 0,90 | PGA3; PGA4           | pepsinogen 3, group I (pepsinogen A); pepsinogen 4, group I (pepsinogen A)                |

|      |                    |                                                                                                                            |
|------|--------------------|----------------------------------------------------------------------------------------------------------------------------|
| 0,90 | CLUH               | clustered mitochondria (cluA/CLU1) homolog                                                                                 |
| 0,90 | ADGRF1             | adhesion G protein-coupled receptor F1                                                                                     |
| 0,90 | PIGR               | polymeric immunoglobulin receptor                                                                                          |
| 0,90 | CACNB1             | calcium channel, voltage-dependent, beta 1 subunit                                                                         |
| 0,90 | BRWD3              | bromodomain and WD repeat domain containing 3                                                                              |
| 0,90 | SPRR2F             | small proline-rich protein 2F                                                                                              |
| 0,90 | SHTN1              | shootin 1                                                                                                                  |
| 0,90 | TRIM15             | tripartite motif containing 15                                                                                             |
| 0,90 | KLHDC10            | kelch domain containing 10                                                                                                 |
| 0,90 | OR5T1              | olfactory receptor, family 5, subfamily T, member 1                                                                        |
| 0,90 | THAP11             | THAP domain containing 11                                                                                                  |
| 0,90 | DNM3               | dynammin 3                                                                                                                 |
| 0,89 | RBM7               | RNA binding motif protein 7                                                                                                |
| 0,89 | FAM180A            | family with sequence similarity 180, member A                                                                              |
| 0,89 | LY6H               | lymphocyte antigen 6 complex, locus H                                                                                      |
| 0,89 | ITCH               | itchy E3 ubiquitin protein ligase                                                                                          |
| 0,89 | DSC2               | desmocollin 2                                                                                                              |
| 0,89 | OR6C1              | olfactory receptor, family 6, subfamily C, member 1                                                                        |
| 0,89 | TRIM42             | tripartite motif containing 42                                                                                             |
| 0,89 | TMIE               | transmembrane inner ear                                                                                                    |
| 0,89 | CNST               | consortin, connexin sorting protein                                                                                        |
| 0,89 | FAM217A            | family with sequence similarity 217, member A                                                                              |
| 0,89 | RILP               | Rab interacting lysosomal protein                                                                                          |
| 0,89 | MOAP1              | modulator of apoptosis 1                                                                                                   |
| 0,89 | PCDH15             | protocadherin-related 15                                                                                                   |
| 0,89 | STMN3              | stathmin-like 3                                                                                                            |
| 0,89 | DCSTAMP            | dendrocyte expressed seven transmembrane protein                                                                           |
| 0,89 | TCEB3CL;<br>TCEB3C | transcription elongation factor B polypeptide 3C-like;<br>transcription elongation factor B polypeptide 3C<br>(elongin A3) |
| 0,89 | HACE1              | HECT domain and ankyrin repeat containing E3<br>ubiquitin protein ligase 1                                                 |
| 0,89 | KIAA0586           | KIAA0586                                                                                                                   |
| 0,89 | SNTA1              | syntrophin, alpha 1                                                                                                        |
| 0,89 | NELFCD             | negative elongation factor complex member C/D                                                                              |
| 0,89 | VPS11              | VPS11, CORVET/HOPS core subunit [Source:HGNC<br>Symbol;Acc:HGNC:14583]                                                     |
| 0,89 | ZNF500             | zinc finger protein 500                                                                                                    |
| 0,89 | DES                | desmin                                                                                                                     |
| 0,89 | NEFM               | neurofilament, medium polypeptide                                                                                          |
| 0,89 | PLA2G7             | phospholipase A2, group VII (platelet-activating factor<br>acetylhydrolase, plasma)                                        |
| 0,89 | C1orf21            | chromosome 1 open reading frame 21                                                                                         |
| 0,89 | USH1C              | Usher syndrome 1C                                                                                                          |
| 0,89 | OR51D1             | olfactory receptor, family 51, subfamily D, member 1                                                                       |
| 0,89 | ZFYVE19            | zinc finger, FYVE domain containing 19                                                                                     |
| 0,89 | SPACA7             | sperm acrosome associated 7                                                                                                |
| 0,89 | UNC5B              | unc-5 netrin receptor B                                                                                                    |
| 0,89 | VEGFA              | vascular endothelial growth factor A                                                                                       |
| 0,89 | TMEM18             | transmembrane protein 18                                                                                                   |

|      |            |                                                                                                               |
|------|------------|---------------------------------------------------------------------------------------------------------------|
| 0,89 | APCS       | amyloid P component, serum                                                                                    |
| 0,89 | PDE1C      | phosphodiesterase 1C, calmodulin-dependent 70kDa                                                              |
| 0,89 | SLBP       | stem-loop binding protein                                                                                     |
| 0,89 | FICD       | FIC domain containing                                                                                         |
| 0,89 | SPATA24    | spermatogenesis associated 24                                                                                 |
| 0,89 | FDXR       | ferredoxin reductase                                                                                          |
| 0,89 | CPLX4      | complexin 4                                                                                                   |
| 0,89 | MAP4K4     | mitogen-activated protein kinase kinase kinase kinase 4                                                       |
| 0,89 | TBC1D10B   | TBC1 domain family, member 10B                                                                                |
| 0,89 | SLC37A4    | solute carrier family 37 (glucose-6-phosphate transporter), member 4 [Source:HGNC Symbol;Acc:HGNC:4061]       |
| 0,89 | ZSCAN1     | zinc finger and SCAN domain containing 1                                                                      |
| 0,89 | LRRC4      | leucine rich repeat containing 4                                                                              |
| 0,89 | UGT3A1     | UDP glycosyltransferase 3 family, polypeptide A1                                                              |
| 0,89 | TNFRSF4    | tumor necrosis factor receptor superfamily, member 4                                                          |
| 0,89 | CHMP4C     | charged multivesicular body protein 4C                                                                        |
| 0,89 | RHBDD3     | rhomboid domain containing 3                                                                                  |
| 0,89 | SIK1       | salt-inducible kinase 1                                                                                       |
| 0,89 | ST6GALNAC1 | ST6 (alpha-N-acetyl-neuraminy1-2,3-beta-galactosyl-1,3)-N-acetylgalactosaminide alpha-2,6-sialyltransferase 1 |
| 0,89 | GIGYF1     | GRB10 interacting GYF protein 1                                                                               |
| 0,89 | FAM111A    | family with sequence similarity 111, member A                                                                 |
| 0,89 | CCDC54     | coiled-coil domain containing 54                                                                              |
| 0,89 | RPS9       | ribosomal protein S9                                                                                          |
| 0,89 | TTC33      | tetratricopeptide repeat domain 33                                                                            |
| 0,89 | FUT4       | fucosyltransferase 4 (alpha (1,3) fucosyltransferase, myeloid-specific)                                       |
| 0,89 | ITK        | IL2-inducible T-cell kinase                                                                                   |
| 0,89 | ADAMTS4    | ADAM metalloproteinase with thrombospondin type 1 motif 4                                                     |
| 0,89 | TRIM5      | tripartite motif containing 5                                                                                 |
| 0,89 | PLEKHO2    | pleckstrin homology domain containing, family O member 2                                                      |
| 0,89 | CCND3      | cyclin D3                                                                                                     |
| 0,89 | NOP9       | NOP9 nucleolar protein                                                                                        |
| 0,89 | IRGM       | immunity-related GTPase family, M                                                                             |
| 0,89 | ZC3H12C    | zinc finger CCCH-type containing 12C                                                                          |
| 0,89 | ACER1      | alkaline ceramidase 1                                                                                         |
| 0,89 | ZNF506     | Transcript Identified by AceView, Entrez Gene ID(s) 284440; 440515                                            |
| 0,89 | CRY2       | Memczak2013 ANTISENSE, CDS, coding, INTERNAL, UTR3 best transcript NM_001127457                               |
| 0,89 | ANKRD24    | ankyrin repeat domain 24                                                                                      |
| 0,89 | GALNT2     | polypeptide N-acetylgalactosaminyltransferase 2                                                               |
| 0,89 | CINP       | cyclin-dependent kinase 2 interacting protein                                                                 |
| 0,89 | ACAP1      | ArfGAP with coiled-coil, ankyrin repeat and PH domains 1                                                      |

|      |                   |                                                                                                 |
|------|-------------------|-------------------------------------------------------------------------------------------------|
| 0,89 | ZIC4              | Zic family member 4                                                                             |
| 0,89 | MS4A18            | membrane-spanning 4-domains, subfamily A, member 18                                             |
| 0,89 | IL1R1             | interleukin 1 receptor, type I                                                                  |
| 0,89 | RIPPLY1           | rippy transcriptional repressor 1                                                               |
| 0,89 | USP20             | ubiquitin specific peptidase 20                                                                 |
| 0,89 | DLG5              | discs, large homolog 5 (Drosophila)                                                             |
| 0,89 | STMN1;<br>MIR3917 | stathmin 1; microRNA 3917                                                                       |
| 0,89 | ZNF780A           | zinc finger protein 780A                                                                        |
| 0,89 | ITFG1             | integrin alpha FG-GAP repeat containing 1                                                       |
| 0,89 | CDK12             | cyclin-dependent kinase 12                                                                      |
| 0,89 | XPO4              | exportin 4                                                                                      |
| 0,89 | DPH7              | diphthamide biosynthesis 7                                                                      |
| 0,89 | PPP2R5B           | protein phosphatase 2, regulatory subunit B, beta                                               |
| 0,89 | DEFA4             | defensin, alpha 4, corticostatin                                                                |
| 0,89 | NPL               | N-acetylneuraminate pyruvate lyase<br>(dihydrodipicolinate synthase)                            |
| 0,89 | C8orf76           | chromosome 8 open reading frame 76                                                              |
| 0,89 | CLEC12B           | C-type lectin domain family 12, member B                                                        |
| 0,89 | PGAP1             | post-GPI attachment to proteins 1                                                               |
| 0,89 | FRMD4B            | FERM domain containing 4B                                                                       |
| 0,89 | PBX3              | pre-B-cell leukemia homeobox 3                                                                  |
| 0,89 | HEY2              | hes-related family bHLH transcription factor with<br>YRPW motif 2                               |
| 0,89 | TMOD1             | tropomodulin 1                                                                                  |
| 0,89 | HTR3E             | 5-hydroxytryptamine (serotonin) receptor 3E,<br>ionotropic                                      |
| 0,89 | KIAA1161          | KIAA1161                                                                                        |
| 0,89 | RPS6KA1           | ribosomal protein S6 kinase, 90kDa, polypeptide 1                                               |
| 0,89 | DFFB              | DNA fragmentation factor, 40kDa, beta polypeptide<br>(caspase-activated DNase)                  |
| 0,89 | APOL5             | apolipoprotein L, 5                                                                             |
| 0,89 | TBCC              | tubulin folding cofactor C                                                                      |
| 0,89 | SCUBE1            | signal peptide, CUB domain, EGF-like 1                                                          |
| 0,89 | WBSCR17           | Memczak2013 ALT_ACCEPTOR, ALT_DONOR,<br>coding, INTERNAL, intronic best transcript<br>NM_022479 |
| 0,89 | LY96              | lymphocyte antigen 96                                                                           |
| 0,89 | PAX6              | paired box 6                                                                                    |
| 0,89 | ZSCAN20           | zinc finger and SCAN domain containing 20                                                       |
| 0,89 | MRPL57            | mitochondrial ribosomal protein L57                                                             |
| 0,89 | LDOC1L            | leucine zipper, down-regulated in cancer 1-like                                                 |
| 0,89 | MAGEB2            | MAGE family member B2                                                                           |
| 0,89 | SOBP              | sine oculis binding protein homolog                                                             |
| 0,89 | FNDC3A            | fibronectin type III domain containing 3A                                                       |
| 0,89 | BLID;<br>MIR100HG | BH3-like motif containing, cell death inducer; mir-100-<br>let-7a-2 cluster host gene           |
| 0,89 | OXLD1             | oxidoreductase-like domain containing 1                                                         |
| 0,89 | NLRP1             | NLR family, pyrin domain containing 1                                                           |

|      |          |                                                                                                                                              |
|------|----------|----------------------------------------------------------------------------------------------------------------------------------------------|
| 0,89 | ETV2     | ets variant 2                                                                                                                                |
| 0,89 | HHAT     | hedgehog acyltransferase                                                                                                                     |
| 0,89 | GCNT1    | glucosaminyl (N-acetyl) transferase 1, core 2                                                                                                |
| 0,89 | ITGB8    | integrin beta 8                                                                                                                              |
| 0,89 | AUTS2    | autism susceptibility candidate 2                                                                                                            |
| 0,89 | MTRR     | 5-methyltetrahydrofolate-homocysteine methyltransferase reductase                                                                            |
| 0,89 | GOLGA8R  | golgin A8 family, member R                                                                                                                   |
| 0,89 | DNASE1L1 | deoxyribonuclease I-like 1                                                                                                                   |
| 0,89 | HRH2     | histamine receptor H2                                                                                                                        |
| 0,89 | LTBP3    | latent transforming growth factor beta binding protein 3                                                                                     |
| 0,89 | KLHDC9   | kelch domain containing 9                                                                                                                    |
| 0,89 | DNAJC17  | DnaJ (Hsp40) homolog, subfamily C, member 17                                                                                                 |
| 0,89 | TRPM8    | transient receptor potential cation channel, subfamily M, member 8                                                                           |
| 0,89 | HSD17B1  | hydroxysteroid (17-beta) dehydrogenase 1                                                                                                     |
| 0,89 | EVI5     | ecotropic viral integration site 5                                                                                                           |
| 0,89 | DOCK11   | dedicator of cytokinesis 11                                                                                                                  |
| 0,89 | PXDN     | peroxidasin                                                                                                                                  |
| 0,89 | GOLGA6L4 | Homo sapiens golgin A6 family-like 4 (GOLGA6L4), mRNA.; golgin A6 family-like 4; golgin A6 family-like 4 [Source:HGNC Symbol;Acc:HGNC:27256] |
| 0,89 | SLC29A3  | Transcript Identified by AceView, Entrez Gene ID(s) 55315                                                                                    |
| 0,89 | ZNF443   | zinc finger protein 443                                                                                                                      |
| 0,89 | RNF128   | ring finger protein 128, E3 ubiquitin protein ligase                                                                                         |
| 0,89 | EFCAB8   | EF-hand calcium binding domain 8                                                                                                             |
| 0,89 | DDX59    | DEAD (Asp-Glu-Ala-Asp) box polypeptide 59                                                                                                    |
| 0,89 | UBN1     | ubinuclein 1                                                                                                                                 |
| 0,89 | THSD7B   | thrombospondin type 1 domain containing 7B                                                                                                   |
| 0,89 | IQCA1L   | IQ motif containing with AAA domain 1 like                                                                                                   |
| 0,89 | HECA     | hdc homolog, cell cycle regulator                                                                                                            |
| 0,89 | FAM63A   | family with sequence similarity 63, member A                                                                                                 |
| 0,89 | MYH8     | myosin, heavy chain 8, skeletal muscle, perinatal                                                                                            |
| 0,89 | NCR3     | natural cytotoxicity triggering receptor 3                                                                                                   |
| 0,89 | PITPNM2  | phosphatidylinositol transfer protein, membrane-associated 2                                                                                 |
| 0,89 | HUNK     | hormonally up-regulated Neu-associated kinase                                                                                                |
| 0,89 | LRRC36   | leucine rich repeat containing 36                                                                                                            |
| 0,89 | PDE3B    | phosphodiesterase 3B, cGMP-inhibited                                                                                                         |
| 0,89 | SUSD4    | sushi domain containing 4                                                                                                                    |
| 0,89 | ZNF688   | zinc finger protein 688                                                                                                                      |
| 0,89 | FGF1     | fibroblast growth factor 1 (acidic)                                                                                                          |
| 0,89 | LARS2    | leucyl-tRNA synthetase 2, mitochondrial                                                                                                      |
| 0,89 | RIT1     | Ras-like without CAAX 1                                                                                                                      |
| 0,89 | LRFN1    | leucine rich repeat and fibronectin type III domain containing 1                                                                             |
| 0,89 | YBEY     | ybeY metalloproteinase (putative)                                                                                                            |
| 0,89 | ZHX1     | zinc fingers and homeoboxes 1                                                                                                                |

|      |                                             |                                                                                                                                                                                                                                                                                           |
|------|---------------------------------------------|-------------------------------------------------------------------------------------------------------------------------------------------------------------------------------------------------------------------------------------------------------------------------------------------|
| 0,89 | ZNF181                                      | zinc finger protein 181                                                                                                                                                                                                                                                                   |
| 0,89 | RGS2                                        | regulator of G-protein signaling 2                                                                                                                                                                                                                                                        |
| 0,89 | LPAR1                                       | Jeck2013 ALT_ACCEPTOR, ALT_DONOR, coding, INTERNAL, intronic best transcript NM_057159; Salzman2013 ALT_ACCEPTOR, ALT_DONOR, coding, INTERNAL, intronic best transcript NM_057159                                                                                                         |
| 0,89 | ARMC6                                       | armadillo repeat containing 6                                                                                                                                                                                                                                                             |
| 0,89 | TP53TG3D; LOC102723655; TP53TG3; AC136612.1 | Homo sapiens TP53 target 3D (TP53TG3D), transcript variant 2, non-coding RNA.; TP53-target gene 3 protein; Homo sapiens TP53 target 3, mRNA (cDNA clone MGC:119889 IMAGE:40015196), complete cds.; Homo sapiens TP53 target 3, mRNA (cDNA clone MGC:119888 IMAGE:40015195), complete cds. |
| 0,89 | TPSD1                                       | tryptase delta 1                                                                                                                                                                                                                                                                          |
| 0,89 | KCNJ16                                      | potassium channel, inwardly rectifying subfamily J, member 16                                                                                                                                                                                                                             |
| 0,89 | CORO2B                                      | coronin, actin binding protein, 2B                                                                                                                                                                                                                                                        |
| 0,89 | OR2Y1                                       | olfactory receptor, family 2, subfamily Y, member 1                                                                                                                                                                                                                                       |
| 0,89 | SOGA3; KIAA0408                             | SOGA family member 3; KIAA0408                                                                                                                                                                                                                                                            |
| 0,89 | TTPA                                        | tocopherol (alpha) transfer protein                                                                                                                                                                                                                                                       |
| 0,89 | CABP7                                       | calcium binding protein 7                                                                                                                                                                                                                                                                 |
| 0,89 | SLC5A8                                      | solute carrier family 5 (sodium/monocarboxylate cotransporter), member 8                                                                                                                                                                                                                  |
| 0,89 | IRF3                                        | interferon regulatory factor 3                                                                                                                                                                                                                                                            |
| 0,89 | GLTSCR2; SNORD23                            | glioma tumor suppressor candidate region gene 2; small nucleolar RNA, C/D box 23                                                                                                                                                                                                          |
| 0,89 | TARS2; MIR6878                              | threonyl-tRNA synthetase 2, mitochondrial (putative); microRNA 6878                                                                                                                                                                                                                       |
| 0,89 | YBX1                                        | Zhang2013 ALT_ACCEPTOR, ALT_DONOR, coding, INTERNAL, intronic best transcript NM_004559                                                                                                                                                                                                   |
| 0,89 | TRABD2B                                     | TraB domain containing 2B                                                                                                                                                                                                                                                                 |
| 0,89 | TCF20                                       | transcription factor 20 (AR1)                                                                                                                                                                                                                                                             |
| 0,89 | TCF20                                       | transcription factor 20 (AR1)                                                                                                                                                                                                                                                             |
| 0,89 | C9orf47; S1PR3                              | chromosome 9 open reading frame 47; sphingosine-1-phosphate receptor 3                                                                                                                                                                                                                    |
| 0,89 | ITGA5                                       | integrin alpha 5                                                                                                                                                                                                                                                                          |
| 0,89 | LRIG2                                       | leucine-rich repeats and immunoglobulin-like domains 2                                                                                                                                                                                                                                    |
| 0,89 | ZNF461                                      | zinc finger protein 461                                                                                                                                                                                                                                                                   |
| 0,89 | PENK                                        | proenkephalin                                                                                                                                                                                                                                                                             |
| 0,89 | COL6A5                                      | collagen, type VI, alpha 5                                                                                                                                                                                                                                                                |
| 0,89 | UIMC1                                       | ubiquitin interaction motif containing 1                                                                                                                                                                                                                                                  |
| 0,89 | JDP2                                        | Jun dimerization protein 2                                                                                                                                                                                                                                                                |
| 0,89 | PRC1-AS1                                    | PRC1 antisense RNA 1                                                                                                                                                                                                                                                                      |
| 0,89 | C3orf30                                     | chromosome 3 open reading frame 30                                                                                                                                                                                                                                                        |
| 0,89 | FANCL                                       | Fanconi anemia complementation group L                                                                                                                                                                                                                                                    |
| 0,89 | ESR1                                        | estrogen receptor 1                                                                                                                                                                                                                                                                       |

|      |                            |                                                                                                               |
|------|----------------------------|---------------------------------------------------------------------------------------------------------------|
| 0,89 | ADRBK2                     | adrenergic, beta, receptor kinase 2                                                                           |
| 0,89 | SPAG4                      | sperm associated antigen 4                                                                                    |
| 0,89 | CHKB-CPT1B                 | CHKB-CPT1B readthrough (NMD candidate)                                                                        |
| 0,89 | ARFGEF2                    | ADP-ribosylation factor guanine nucleotide-exchange factor 2 (brefeldin A-inhibited)                          |
| 0,89 | ZC3H12A;<br>MIR6732        | zinc finger CCCH-type containing 12A; microRNA 6732                                                           |
| 0,89 | SHISA8                     | shisa family member 8                                                                                         |
| 0,89 | RGS1                       | regulator of G-protein signaling 1                                                                            |
| 0,89 | GCOM1;<br>MYZAP;<br>POLR2M | GRINL1A complex locus 1; myocardial zonula adherens protein; polymerase (RNA) II (DNA directed) polypeptide M |
| 0,89 | STK36                      | serine/threonine kinase 36                                                                                    |
| 0,89 | LRRC72                     | leucine rich repeat containing 72                                                                             |
| 0,89 | THAP7-AS1                  | THAP7 antisense RNA 1                                                                                         |
| 0,89 | SGTB                       | small glutamine-rich tetratricopeptide repeat (TPR)-containing, beta                                          |
| 0,89 | IFT46                      | intraflagellar transport 46                                                                                   |
| 0,89 | ZNF821                     | zinc finger protein 821                                                                                       |
| 0,89 | SEMA6A                     | sema domain, transmembrane domain (TM), and cytoplasmic domain, (semaphorin) 6A                               |
| 0,89 | ASIC4                      | acid sensing ion channel family member 4                                                                      |
| 0,89 | UCN                        | urocortin                                                                                                     |
| 0,89 | ZNF852                     | zinc finger protein 852                                                                                       |
| 0,89 | KLK8                       | kallikrein related peptidase 8                                                                                |
| 0,89 | SLC16A6                    | solute carrier family 16, member 6                                                                            |
| 0,89 | LYG2                       | lysozyme G-like 2                                                                                             |
| 0,89 | STRN4                      | striatin, calmodulin binding protein 4                                                                        |
| 0,89 | SLC35E3                    | solute carrier family 35, member E3                                                                           |
| 0,89 | TWF2                       | twinfilin actin binding protein 2                                                                             |
| 0,89 | CLCN6                      | chloride channel, voltage-sensitive 6                                                                         |
| 0,89 | PRAMEF27                   | PRAME family member 27                                                                                        |
| 0,89 | SLC34A2                    | solute carrier family 34 (type II sodium/phosphate cotransporter), member 2                                   |
| 0,89 | MARCH8                     | membrane associated ring finger 8                                                                             |
| 0,89 | OPA3                       | optic atrophy 3 (autosomal recessive, with chorea and spastic paraplegia)                                     |
| 0,89 | PLXNA3                     | plexin A3                                                                                                     |
| 0,89 | NES                        | nestin                                                                                                        |
| 0,89 | KRTAP1-5                   | keratin associated protein 1-5                                                                                |
| 0,89 | TLE6                       | transducin-like enhancer of split 6                                                                           |
| 0,89 | RRP9                       | ribosomal RNA processing 9, small subunit (SSU) processome component, homolog (yeast)                         |
| 0,89 | WDR73                      | WD repeat domain 73                                                                                           |
| 0,89 | ASF1B                      | anti-silencing function 1B histone chaperone                                                                  |
| 0,89 | INSL4                      | insulin-like 4 (placenta)                                                                                     |
| 0,89 | GPR52                      | G protein-coupled receptor 52                                                                                 |
| 0,89 | PIGN                       | phosphatidylinositol glycan anchor biosynthesis class N                                                       |
| 0,89 | EEF2K                      | eukaryotic elongation factor 2 kinase                                                                         |

|      |                       |                                                                                                                                                      |
|------|-----------------------|------------------------------------------------------------------------------------------------------------------------------------------------------|
| 0,89 | ATP7A                 | ATPase, Cu++ transporting, alpha polypeptide                                                                                                         |
| 0,89 | VSTM2A;<br>VSTM2A-OT1 | V-set and transmembrane domain containing 2A;<br>VSTM2A overlapping transcript 1                                                                     |
| 0,89 | NAPB                  | N-ethylmaleimide-sensitive factor attachment protein,<br>beta                                                                                        |
| 0,89 | CD99                  | CD99 molecule                                                                                                                                        |
| 0,89 | KLHDC4                | kelch domain containing 4                                                                                                                            |
| 0,89 | CFAP44                | cilia and flagella associated protein 44                                                                                                             |
| 0,89 | OSBPL7                | oxysterol binding protein-like 7                                                                                                                     |
| 0,89 | TXNDC16               | thioredoxin domain containing 16                                                                                                                     |
| 0,89 | ADAM22                | ADAM metallopeptidase domain 22                                                                                                                      |
| 0,89 | UBE2J1                | ubiquitin-conjugating enzyme E2, J1                                                                                                                  |
| 0,89 | TSTD1                 | thiosulfate sulfurtransferase (rhodanese)-like domain<br>containing 1                                                                                |
| 0,89 | ARHGAP30              | Rho GTPase activating protein 30                                                                                                                     |
| 0,89 | GVQW2                 | GVQW motif containing 2                                                                                                                              |
| 0,89 | EIF2AK4               | eukaryotic translation initiation factor 2 alpha kinase 4                                                                                            |
| 0,89 | CRNKL1                | crooked neck pre-mRNA splicing factor 1                                                                                                              |
| 0,89 | SYNE3                 | spectrin repeat containing, nuclear envelope family<br>member 3                                                                                      |
| 0,89 | E4F1                  | E4F transcription factor 1                                                                                                                           |
| 0,89 | SDHAF3                | succinate dehydrogenase complex assembly factor 3                                                                                                    |
| 0,89 | ADAMTS6               | ADAM metallopeptidase with thrombospondin type 1<br>motif 6                                                                                          |
| 0,89 | ZNF544                | zinc finger protein 544                                                                                                                              |
| 0,89 | DGKG                  | diacylglycerol kinase gamma                                                                                                                          |
| 0,89 | ANKRD60               | ankyrin repeat domain 60                                                                                                                             |
| 0,89 | MFAP3                 | microfibrillar associated protein 3                                                                                                                  |
| 0,89 | CBY1                  | chibby homolog 1 (Drosophila)                                                                                                                        |
| 0,89 | ZBED1; DHRSX          | zinc finger, BED-type containing 1;<br>dehydrogenase/reductase (SDR family) X-linked<br>mechanistic target of rapamycin (serine/threonine<br>kinase) |
| 0,89 | MTOR                  |                                                                                                                                                      |
| 0,89 | SAMD7                 | sterile alpha motif domain containing 7                                                                                                              |
| 0,89 | DUSP28                | dual specificity phosphatase 28                                                                                                                      |
| 0,89 | ERGIC1                | Memczak2013 ALT_ACCEPTOR, ALT_DONOR,<br>coding, INTERNAL, intronic best transcript<br>NM_001031711                                                   |
| 0,89 | ANXA6                 | annexin A6                                                                                                                                           |
| 0,89 | PTPN5                 | protein tyrosine phosphatase, non-receptor type 5<br>(striatum-enriched)                                                                             |
| 0,89 | UBE2T                 | ubiquitin conjugating enzyme E2T                                                                                                                     |
| 0,89 | SUMF2                 | sulfatase modifying factor 2                                                                                                                         |
| 0,89 | GSAP                  | gamma-secretase activating protein                                                                                                                   |
| 0,89 | ELF1                  | Memczak2013 ALT_ACCEPTOR, ALT_DONOR,<br>coding, INTERNAL, intronic best transcript<br>NM_172373                                                      |
| 0,89 | ARHGEF2               | Rho/Rac guanine nucleotide exchange factor 2                                                                                                         |
| 0,89 | GOLGA2P5              | golgin A2 pseudogene 5                                                                                                                               |
| 0,89 | DNAH12                | dynein, axonemal, heavy chain 12                                                                                                                     |

|      |           |                                                                                  |
|------|-----------|----------------------------------------------------------------------------------|
| 0,89 | HEY1      | hes-related family bHLH transcription factor with YRPW motif 1                   |
| 0,89 | CKAP2L    | cytoskeleton associated protein 2-like                                           |
| 0,89 | IL12RB2   | interleukin 12 receptor, beta 2                                                  |
| 0,89 | KLC4      | kinesin light chain 4                                                            |
| 0,89 | NOL6      | Memczak2013 ANTISENSE, CDS, coding, INTERNAL, intronic best transcript NM_139235 |
| 0,89 | RWDD2A    | RWD domain containing 2A                                                         |
| 0,89 | TMEM155   | transmembrane protein 155                                                        |
| 0,89 | KIAA0319  | KIAA0319                                                                         |
| 0,89 | NCOA5     | nuclear receptor coactivator 5                                                   |
| 0,89 | TPRN      | taperin                                                                          |
| 0,89 | C11orf85  | chromosome 11 open reading frame 85                                              |
| 0,89 | PADI4     | peptidyl arginine deiminase, type IV                                             |
| 0,89 | MFS12     | major facilitator superfamily domain containing 12                               |
| 0,89 | CR1       | complement component (3b/4b) receptor 1 (Knops blood group)                      |
| 0,89 | ZBTB18    | zinc finger and BTB domain containing 18                                         |
| 0,89 | PAK2      | p21 protein (Cdc42/Rac)-activated kinase 2                                       |
| 0,89 | PSMB8-AS1 | PSMB8 antisense RNA 1 (head to head)                                             |
| 0,89 | LINS1     | lines homolog 1                                                                  |
| 0,89 | NPHP4     | nephronophthisis 4                                                               |
| 0,89 | PEX11G    | peroxisomal biogenesis factor 11 gamma                                           |
| 0,89 | C11orf53  | chromosome 11 open reading frame 53                                              |
| 0,89 | F10       | coagulation factor X                                                             |
| 0,89 | TESPA1    | thymocyte expressed, positive selection associated 1                             |
| 0,89 | FOXO3     | forkhead box O3                                                                  |
| 0,89 | APEX2     | APEX nuclease (apurinic/apyrimidinic endonuclease) 2                             |
| 0,89 | SMYD1     | SET and MYND domain containing 1                                                 |
| 0,89 | OBSL1     | obscurin-like 1                                                                  |
| 0,89 | IDH3B     | isocitrate dehydrogenase 3 (NAD+) beta                                           |
| 0,89 | CYP3A43   | cytochrome P450, family 3, subfamily A, polypeptide 43                           |
| 0,89 | L1CAM     | L1 cell adhesion molecule                                                        |
| 0,89 | SIRT1     | sirtuin 1                                                                        |
| 0,89 | CXCR2     | chemokine (C-X-C motif) receptor 2                                               |
| 0,89 | CCDC144A  | coiled-coil domain containing 144A                                               |
| 0,89 | SPT2D1    | SPT2 chromatin protein domain containing 1                                       |
| 0,89 | VN1R10P   | vomeroneural 1 receptor 10 pseudogene                                            |
| 0,89 | ADCK3     | aarF domain containing kinase 3                                                  |
| 0,89 | ARSA      | arylsulfatase A                                                                  |
| 0,89 | HAPLN3    | hyaluronan and proteoglycan link protein 3                                       |
| 0,89 | DGKI      | diacylglycerol kinase, iota                                                      |
| 0,89 | GRASP     | GRP1 (general receptor for phosphoinositides 1)-associated scaffold protein      |
| 0,89 | SLC26A3   | solute carrier family 26 (anion exchanger), member 3                             |
| 0,89 | ANKRD53   | ankyrin repeat domain 53                                                         |
| 0,89 | TYK2      | tyrosine kinase 2                                                                |
| 0,89 | MAP1A     | microtubule associated protein 1A                                                |

|      |                    |                                                                                   |
|------|--------------------|-----------------------------------------------------------------------------------|
| 0,89 | DCDC2              | doublecortin domain containing 2                                                  |
| 0,89 | SLC35E2B           | solute carrier family 35, member E2B                                              |
| 0,89 | RGS6               | regulator of G-protein signaling 6                                                |
| 0,89 | CALCOCO2           | calcium binding and coiled-coil domain 2                                          |
| 0,89 | SMG8               | SMG8 nonsense mediated mRNA decay factor                                          |
| 0,89 | TAF3               | TATA box binding protein associated factor 3                                      |
| 0,89 | CNIH4              | cornichon family AMPA receptor auxiliary protein 4                                |
| 0,89 | CEP295NL;<br>TIMP2 | CEP295 N-terminal like; TIMP metallopeptidase inhibitor 2                         |
| 0,89 | MST1R              | macrophage stimulating 1 receptor                                                 |
| 0,89 | MEDAG              | mesenteric estrogen-dependent adipogenesis                                        |
| 0,89 | CITED1             | Cbp/p300-interacting transactivator, with Glu/Asp rich carboxy-terminal domain, 1 |
| 0,89 | TAF4B              | TAF4b RNA polymerase II, TATA box binding protein (TBP)-associated factor, 105kDa |
| 0,89 | WNT9A              | wingless-type MMTV integration site family, member 9A                             |
| 0,89 | E2F7               | E2F transcription factor 7                                                        |
| 0,89 | DOCK5              | dedicator of cytokinesis 5                                                        |
| 0,89 | SYNC               | syncoilin, intermediate filament protein                                          |
| 0,89 | RNASE2             | ribonuclease, RNase A family, 2 (liver, eosinophil-derived neurotoxin)            |
| 0,89 | CHRNA9             | cholinergic receptor, nicotinic alpha 9                                           |
| 0,89 | UXT-AS1            | UXT antisense RNA 1                                                               |
| 0,89 | APOBEC3F           | apolipoprotein B mRNA editing enzyme, catalytic polypeptide-like 3F               |
| 0,89 | FRAS1              | Fraser extracellular matrix complex subunit 1                                     |
| 0,89 | GKN2               | gastrokine 2                                                                      |
| 0,89 | SURF1              | surfeit 1                                                                         |
| 0,89 | PEX12              | peroxisomal biogenesis factor 12                                                  |
| 0,89 | SUSD2              | sushi domain containing 2                                                         |
| 0,89 | CCKBR              | cholecystokinin B receptor                                                        |
| 0,89 | ZNF783             | zinc finger family member 783                                                     |
| 0,89 | MNAT1              | MNAT CDK-activating kinase assembly factor 1                                      |
| 0,89 | CYLC1              | cylicin, basic protein of sperm head cytoskeleton 1                               |
| 0,89 | VN1R4              | vomeroneural 1 receptor 4                                                         |
| 0,89 | PSMB10             | proteasome subunit beta 10                                                        |
| 0,89 | SLC24A5            | solute carrier family 24 (sodium/potassium/calcium exchanger), member 5           |
| 0,89 | CFHR3              | complement factor H-related 3                                                     |
| 0,89 | STK17A             | serine/threonine kinase 17a                                                       |
| 0,89 | NMU                | neuromedin U                                                                      |
| 0,89 | FUNDC2             | FUN14 domain containing 2                                                         |
| 0,89 | ZDBF2              | zinc finger, DBF-type containing 2                                                |
| 0,89 | CARD18             | caspase recruitment domain family, member 18                                      |
| 0,89 | ADAD1              | adenosine deaminase domain containing 1                                           |
| 0,89 | PCYOX1L            | prenylcysteine oxidase 1 like                                                     |
| 0,89 | PDZD11             | PDZ domain containing 11                                                          |
| 0,89 | GPR179             | G protein-coupled receptor 179                                                    |
| 0,89 | ACOT11             | acyl-CoA thioesterase 11                                                          |

|      |                                      |                                                                                                                               |
|------|--------------------------------------|-------------------------------------------------------------------------------------------------------------------------------|
| 0,89 | USP9X                                | ubiquitin specific peptidase 9, X-linked                                                                                      |
| 0,89 | ARHGAP27                             | Rho GTPase activating protein 27                                                                                              |
| 0,89 | HNRNPA1P33;<br>LINC00842;<br>ANXA8L1 | heterogeneous nuclear ribonucleoprotein A1<br>pseudogene 33; long intergenic non-protein coding<br>RNA 842; annexin A8-like 1 |
| 0,89 | ZNF512B                              | zinc finger protein 512B                                                                                                      |
| 0,89 | KLHL13                               | kelch-like family member 13                                                                                                   |
| 0,89 | NAA20                                | N(alpha)-acetyltransferase 20, NatB catalytic subunit                                                                         |
| 0,89 | SH3TC2                               | SH3 domain and tetratricopeptide repeats 2                                                                                    |
| 0,89 | TSSK4                                | testis-specific serine kinase 4                                                                                               |
| 0,89 | CEP72                                | centrosomal protein 72kDa                                                                                                     |
| 0,89 | PLPPR5                               | phospholipid phosphatase related 5                                                                                            |
| 0,89 | MRGPRX3                              | MAS-related GPR, member X3                                                                                                    |
| 0,89 | CTSZ                                 | cathepsin Z                                                                                                                   |
| 0,89 | RINL                                 | Ras and Rab interactor like                                                                                                   |
| 0,89 | PEG3; ZIM2                           | paternally expressed 3; zinc finger, imprinted 2                                                                              |
| 0,89 | IL17RD                               | interleukin 17 receptor D                                                                                                     |
| 0,89 | FRAT1                                | frequently rearranged in advanced T-cell lymphomas 1                                                                          |
| 0,89 | HYOU1                                | hypoxia up-regulated 1                                                                                                        |
| 0,89 | CNTFR                                | ciliary neurotrophic factor receptor                                                                                          |
| 0,89 | HECW2                                | HECT, C2 and WW domain containing E3 ubiquitin<br>protein ligase 2                                                            |
| 0,89 | STAT4                                | signal transducer and activator of transcription 4                                                                            |
| 0,89 | BTAF1                                | BTAF1 RNA polymerase II, B-TFIID transcription<br>factor-associated, 170kDa                                                   |
| 0,89 | CHST14                               | carbohydrate (N-acetylgalactosamine 4-0)<br>sulfotransferase 14                                                               |
| 0,89 | WRNIP1                               | Werner helicase interacting protein 1                                                                                         |
| 0,89 | FLNB                                 | filamin B, beta                                                                                                               |
| 0,89 | SDR42E2                              | short chain dehydrogenase/reductase family 42E,<br>member 2                                                                   |
| 0,89 | SREBF2                               | sterol regulatory element binding transcription factor 2                                                                      |
| 0,89 | NEDD9                                | neural precursor cell expressed, developmentally down-<br>regulated 9                                                         |
| 0,89 | PKMYT1                               | protein kinase, membrane associated tyrosine/threonine<br>1                                                                   |
| 0,89 | ORM1                                 | orosomucoid 1                                                                                                                 |
| 0,89 | NAALADL2                             | N-acetylated alpha-linked acidic dipeptidase-like 2                                                                           |
| 0,89 | SOCS2                                | suppressor of cytokine signaling 2                                                                                            |
| 0,89 | CADPS2                               | Ca <sup>++</sup> -dependent secretion activator 2                                                                             |
| 0,89 | ARPIN                                | actin-related protein 2/3 complex inhibitor                                                                                   |
| 0,89 | KCNK17                               | potassium channel, two pore domain subfamily K,<br>member 17                                                                  |
| 0,89 | IGFBP7                               | insulin like growth factor binding protein 7                                                                                  |
| 0,89 | CNOT1;<br>SNORA50A                   | CCR4-NOT transcription complex subunit 1; small<br>nucleolar RNA, H/ACA box 50A                                               |
| 0,89 | KIF15                                | kinesin family member 15                                                                                                      |
| 0,89 | ACSBG1                               | acyl-CoA synthetase bubblegum family member 1                                                                                 |

|      |                                        |                                                                                                   |
|------|----------------------------------------|---------------------------------------------------------------------------------------------------|
| 0,89 | ZNF883                                 | zinc finger protein 883                                                                           |
| 0,89 | ATRN                                   | attractin                                                                                         |
| 0,89 | UPP1                                   | uridine phosphorylase 1                                                                           |
| 0,89 | SSUH2                                  | ssu-2 homolog (C. elegans)                                                                        |
| 0,89 | RERGL                                  | RERG/RAS-like                                                                                     |
| 0,89 | SSBP3                                  | single stranded DNA binding protein 3                                                             |
| 0,89 | IL17D                                  | interleukin 17D                                                                                   |
| 0,89 | FABP12                                 | fatty acid binding protein 12                                                                     |
| 0,89 | H1F0                                   | H1 histone family, member 0                                                                       |
| 0,89 | ANKRD39                                | ankyrin repeat domain 39                                                                          |
| 0,89 | MAMLD1                                 | mastermind-like domain containing 1                                                               |
| 0,89 | ZNF84                                  | zinc finger protein 84                                                                            |
| 0,89 | FAM221A                                | family with sequence similarity 221, member A                                                     |
| 0,89 | SNAP47                                 | synaptosome associated protein 47kDa                                                              |
| 0,89 | CASC5                                  | cancer susceptibility candidate 5                                                                 |
| 0,89 | LOC730183;<br>RP11-146F11.1;<br>hitema | uncharacterized LOC730183; Transcript Identified by AceView; novel transcript, antisense to SRCAP |
| 0,89 | RAPGEF6                                | Rap guanine nucleotide exchange factor 6                                                          |
| 0,89 | CSRP2                                  | cysteine and glycine-rich protein 2                                                               |
| 0,89 | GPR20                                  | G protein-coupled receptor 20                                                                     |
| 0,89 | RAET1G                                 | retinoic acid early transcript 1G                                                                 |
| 0,89 | AIFM3                                  | apoptosis-inducing factor, mitochondrion-associated, 3                                            |
| 0,89 | ANXA4                                  | Salzman2013 ANTISENSE, coding, INTERNAL, intronic best transcript NM_001153                       |
| 0,89 | HSD17B3                                | hydroxysteroid (17-beta) dehydrogenase 3                                                          |
| 0,89 | CCDC83                                 | coiled-coil domain containing 83                                                                  |
| 0,89 | AFAP1L1                                | actin filament associated protein 1-like 1                                                        |
| 0,89 | CCDC191                                | coiled-coil domain containing 191                                                                 |
| 0,89 | SLC10A2                                | solute carrier family 10 (sodium/bile acid cotransporter), member 2                               |
| 0,89 | WNT5B                                  | wingless-type MMTV integration site family, member 5B                                             |
| 0,89 | TESK2                                  | testis-specific kinase 2                                                                          |
| 0,89 | DGKD                                   | diacylglycerol kinase, delta 130kDa                                                               |
| 0,89 | LOC283731;<br>RP11-247C2.2             | uncharacterized LOC283731; novel transcript                                                       |
| 0,89 | F5                                     | coagulation factor V (proaccelerin, labile factor)                                                |
| 0,89 | XPC                                    | xeroderma pigmentosum, complementation group C                                                    |
| 0,89 | KBTBD11                                | kelch repeat and BTB (POZ) domain containing 11                                                   |
| 0,89 | KLK6                                   | kallikrein related peptidase 6                                                                    |
| 0,89 | FGF22                                  | fibroblast growth factor 22                                                                       |
| 0,89 | GALNT13                                | polypeptide N-acetylgalactosaminyltransferase 13                                                  |
| 0,89 | INSIG1                                 | insulin induced gene 1                                                                            |
| 0,89 | CLEC4D                                 | C-type lectin domain family 4, member D                                                           |
| 0,89 | LRRC63                                 | leucine rich repeat containing 63                                                                 |
| 0,89 | PET117;<br>CSRP2BP                     | PET117 homolog; CSRP2 binding protein                                                             |
| 0,89 | TRPS1                                  | trichorhinophalangeal syndrome I                                                                  |

|      |                       |                                                                                              |
|------|-----------------------|----------------------------------------------------------------------------------------------|
| 0,89 | BCLAF1                | Memczak2013 ALT_DONOR, coding, INTERNAL, intronic best transcript NM_014739                  |
| 0,89 | STK17B                | serine/threonine kinase 17b                                                                  |
| 0,88 | BTBD2                 | BTB (POZ) domain containing 2                                                                |
| 0,88 | PHC1                  | polyhomeotic homolog 1 (Drosophila)                                                          |
| 0,88 | CLSTN1                | calsyntenin 1                                                                                |
| 0,88 | ATG16L1               | autophagy related 16-like 1                                                                  |
| 0,88 | GUSBP2                | glucuronidase, beta pseudogene 2                                                             |
| 0,88 | MMP25-AS1             | MMP25 antisense RNA 1                                                                        |
| 0,88 | TRIM49D1;<br>TRIM49D2 | tripartite motif containing 49D1; tripartite motif containing 49D2                           |
| 0,88 | SEC61B                | Sec61 translocon beta subunit                                                                |
| 0,88 | FAM83H                | family with sequence similarity 83, member H                                                 |
| 0,88 | TRIM43                | tripartite motif containing 43                                                               |
| 0,88 | ZFHX4                 | zinc finger homeobox 4                                                                       |
| 0,88 | SMAP1                 | small ArfGAP 1                                                                               |
| 0,88 | SIX4                  | SIX homeobox 4                                                                               |
| 0,88 | IDH2                  | isocitrate dehydrogenase 2 (NADP+), mitochondrial                                            |
| 0,88 | CREM                  | cAMP responsive element modulator                                                            |
| 0,88 | ADCK2                 | aarF domain containing kinase 2                                                              |
| 0,88 | MARK4                 | MAP/microtubule affinity-regulating kinase 4                                                 |
| 0,88 | IRAK2                 | interleukin 1 receptor associated kinase 2                                                   |
| 0,88 | WSCD2                 | WSC domain containing 2                                                                      |
| 0,88 | GLB1L                 | galactosidase beta 1 like                                                                    |
| 0,88 | PPEF1                 | protein phosphatase, EF-hand calcium binding domain 1                                        |
| 0,88 | KIF18B                | Memczak2013 ALT_ACCEPTOR, coding, INTERNAL, intronic best transcript NM_001080443            |
| 0,88 | SPTLC2                | serine palmitoyltransferase, long chain base subunit 2                                       |
| 0,88 | PLXNA4                | plexin A4                                                                                    |
| 0,88 | SIGLEC9               | sialic acid binding Ig-like lectin 9                                                         |
| 0,88 | IL13RA2               | interleukin 13 receptor, alpha 2                                                             |
| 0,88 | ZNF48                 | zinc finger protein 48                                                                       |
| 0,88 | ACSF3                 | acyl-CoA synthetase family member 3                                                          |
| 0,88 | CXorf36               | chromosome X open reading frame 36                                                           |
| 0,88 | LILRA5                | leukocyte immunoglobulin-like receptor, subfamily A (with TM domain), member 5               |
| 0,88 | PURB; MIR4657         | purine-rich element binding protein B; microRNA 4657                                         |
| 0,88 | GP1BA                 | glycoprotein Ib (platelet), alpha polypeptide                                                |
| 0,88 | PLEKHA4               | pleckstrin homology domain containing, family A (phosphoinositide binding specific) member 4 |
| 0,88 | ANO6                  | Transcript Identified by AceView, Entrez Gene ID(s) 196527                                   |
| 0,88 | MAGEC2                | MAGE family member C2                                                                        |
| 0,88 | TMEM263               | transmembrane protein 263                                                                    |
| 0,88 | PDE4A                 | phosphodiesterase 4A, cAMP-specific                                                          |
| 0,88 | GH1                   | growth hormone 1                                                                             |
| 0,88 | CREBBP                | CREB binding protein                                                                         |
| 0,88 | CD84                  | CD84 molecule                                                                                |

|      |                   |                                                                                                 |
|------|-------------------|-------------------------------------------------------------------------------------------------|
| 0,88 | NOS2              | nitric oxide synthase 2, inducible                                                              |
| 0,88 | ZC2HC1A           | zinc finger, C2HC-type containing 1A                                                            |
| 0,88 | DTNB              | dystrobrevin beta                                                                               |
| 0,88 | LLGL1             | lethal giant larvae homolog 1 (Drosophila)                                                      |
| 0,88 | RAB39B            | Transcript Identified by AceView, Entrez Gene ID(s)<br>116442                                   |
| 0,88 | MTRNR2L7          | MT-RNR2-like 7                                                                                  |
| 0,88 | ALKBH5            | alkB homolog 5, RNA demethylase                                                                 |
| 0,88 | MYO15A            | myosin XVA                                                                                      |
| 0,88 | BICD2             | bicaudal D homolog 2 (Drosophila)                                                               |
| 0,88 | OR4C11            | olfactory receptor, family 4, subfamily C, member 11                                            |
| 0,88 | EFCAB2            | EF-hand calcium binding domain 2                                                                |
| 0,88 | SPTBN1            | spectrin, beta, non-erythrocytic 1                                                              |
| 0,88 | PTPN7             | protein tyrosine phosphatase, non-receptor type 7                                               |
| 0,88 | HAPLN4            | hyaluronan and proteoglycan link protein 4                                                      |
| 0,88 | SAP30L            | SAP30-like                                                                                      |
| 0,88 | RDH8              | retinol dehydrogenase 8 (all-trans)                                                             |
| 0,88 | PRM1              | protamine 1                                                                                     |
| 0,88 | CD8B              | CD8b molecule                                                                                   |
| 0,88 | BCL2L14           | BCL2-like 14 (apoptosis facilitator)                                                            |
| 0,88 | RCN1              | reticulocalbin 1, EF-hand calcium binding domain                                                |
| 0,88 | KIAA1958          | KIAA1958                                                                                        |
| 0,88 | ZBTB20; MIR568    | zinc finger and BTB domain containing 20; microRNA<br>568                                       |
| 0,88 | SCAI; GOLGA1      | suppressor of cancer cell invasion; golgin A1                                                   |
| 0,88 | ZNF827            | zinc finger protein 827                                                                         |
| 0,88 | NDRG4             | NDRG family member 4                                                                            |
| 0,88 | EMILIN3           | elastin microfibril interfacer 3                                                                |
| 0,88 | GRAMD1B           | GRAM domain containing 1B                                                                       |
| 0,88 | ACR               | acrosin                                                                                         |
| 0,88 | CTSB              | cathepsin B                                                                                     |
| 0,88 | RPS9              | Jeck2013 ANTISENSE, CDS, coding, INTERNAL,<br>OVCODE, OVEXON, UTR3 best transcript<br>NM_001013 |
| 0,88 | GRAMD2            | GRAM domain containing 2                                                                        |
| 0,88 | CAD               | carbamoyl-phosphate synthetase 2, aspartate<br>transcarbamylase, and dihydroorotase             |
| 0,88 | C2CD3             | C2 calcium-dependent domain containing 3                                                        |
| 0,88 | LAMA5;<br>MIR4758 | laminin, alpha 5; microRNA 4758                                                                 |
| 0,88 | C14orf79          | chromosome 14 open reading frame 79                                                             |
| 0,88 | HIPK1             | homeodomain interacting protein kinase 1                                                        |
| 0,88 | FAAP100           | Fanconi anemia core complex associated protein 100                                              |
| 0,88 | CNNM3             | cyclin and CBS domain divalent metal cation transport<br>mediator 3                             |
| 0,88 | MAP3K3            | mitogen-activated protein kinase kinase kinase 3                                                |
| 0,88 | RAP1GAP           | RAP1 GTPase activating protein                                                                  |
| 0,88 | MAP3K13           | mitogen-activated protein kinase kinase kinase 13                                               |
| 0,88 | RGR               | retinal G protein coupled receptor                                                              |
| 0,88 | C19orf44          | chromosome 19 open reading frame 44                                                             |

|      |                 |                                                                                        |
|------|-----------------|----------------------------------------------------------------------------------------|
| 0,88 | DIAPH1          | diaphanous-related formin 1                                                            |
| 0,88 | KRT17           | keratin 17, type I                                                                     |
| 0,88 | DCLRE1B         | DNA cross-link repair 1B                                                               |
| 0,88 | ZP4             | zona pellucida glycoprotein 4                                                          |
| 0,88 | CCDC103         | coiled-coil domain containing 103                                                      |
| 0,88 | SYCE1L          | synaptonemal complex central element protein 1-like                                    |
| 0,88 | PCDHB4          | protocadherin beta 4                                                                   |
| 0,88 | ARRDC4          | arrestin domain containing 4                                                           |
| 0,88 | ZNF564          | zinc finger protein 564                                                                |
| 0,88 | MARK3           | MAP/microtubule affinity-regulating kinase 3                                           |
| 0,88 | HEXIM1          | hexamethylene bis-acetamide inducible 1                                                |
| 0,88 | RNF111          | ring finger protein 111                                                                |
| 0,88 | PITPNM3         | PITPNM family member 3                                                                 |
| 0,88 | ITGB4           | integrin beta 4                                                                        |
| 0,88 | RASSF3          | Ras association (RalGDS/AF-6) domain family member 3                                   |
| 0,88 | PKD2            | polycystic kidney disease 2 (autosomal dominant)                                       |
| 0,88 | ZNF843          | zinc finger protein 843                                                                |
| 0,88 | DHRS7           | dehydrogenase/reductase (SDR family) member 7                                          |
| 0,88 | RAB28           | Jeck2013 ALT_ACCEPTOR, ALT_DONOR, coding, INTERNAL, intronic best transcript NM_004249 |
| 0,88 | CD99L2          | CD99 molecule-like 2                                                                   |
| 0,88 | REL             | v-rel avian reticuloendotheliosis viral oncogene homolog                               |
| 0,88 | C1orf168        | chromosome 1 open reading frame 168                                                    |
| 0,88 | CILP2           | cartilage intermediate layer protein 2                                                 |
| 0,88 | TOP3B           | topoisomerase (DNA) III beta                                                           |
| 0,88 | EVI2A; EVI2B    | ecotropic viral integration site 2A; ecotropic viral integration site 2B               |
| 0,88 | FAM174B         | family with sequence similarity 174, member B                                          |
| 0,88 | TRIM46          | tripartite motif containing 46                                                         |
| 0,88 | STK25           | serine/threonine kinase 25                                                             |
| 0,88 | CCDC142; MRPL53 | coiled-coil domain containing 142; mitochondrial ribosomal protein L53                 |
| 0,88 | MAPT            | microtubule associated protein tau                                                     |
| 0,88 | CDKN3           | cyclin-dependent kinase inhibitor 3                                                    |
| 0,88 | UQCRI1          | ubiquinol-cytochrome c reductase, complex III subunit XI                               |
| 0,88 | KLHDC1          | kelch domain containing 1                                                              |
| 0,88 | RAB34           | RAB34, member RAS oncogene family                                                      |
| 0,88 | BIRC3           | Memczak2013 ANTISENSE, CDS, coding, INTERNAL best transcript NM_182962                 |
| 0,88 | PIK3C2A         | phosphatidylinositol-4-phosphate 3-kinase, catalytic subunit type 2 alpha              |
| 0,88 | DDRGK1          | DDRGK domain containing 1                                                              |
| 0,88 | MAFB            | v-maf avian musculoaponeurotic fibrosarcoma oncogene homolog B                         |
| 0,88 | ZNF551          | zinc finger protein 551                                                                |
| 0,88 | CXCL12          | chemokine (C-X-C motif) ligand 12                                                      |
| 0,88 | PLAUR           | plasminogen activator, urokinase receptor                                              |

|      |                           |                                                                                                                                                                                       |
|------|---------------------------|---------------------------------------------------------------------------------------------------------------------------------------------------------------------------------------|
| 0,88 | CCDC126                   | coiled-coil domain containing 126                                                                                                                                                     |
| 0,88 | POU2AF1                   | POU class 2 associating factor 1                                                                                                                                                      |
| 0,88 | APOA4                     | apolipoprotein A-IV                                                                                                                                                                   |
| 0,88 | SERPINB7                  | serpin peptidase inhibitor, clade B (ovalbumin), member 7                                                                                                                             |
| 0,88 | SLC22A23                  | solute carrier family 22, member 23                                                                                                                                                   |
| 0,88 | FMNL2                     | formin like 2                                                                                                                                                                         |
| 0,88 | SLC35G2                   | solute carrier family 35, member G2                                                                                                                                                   |
| 0,88 | TRIP4                     | thyroid hormone receptor interactor 4                                                                                                                                                 |
| 0,88 | FAM133A                   | family with sequence similarity 133, member A                                                                                                                                         |
| 0,88 | C1orf74                   | chromosome 1 open reading frame 74                                                                                                                                                    |
| 0,88 | METRN                     | meteorin, glial cell differentiation regulator                                                                                                                                        |
| 0,88 | ITGA3                     | integrin alpha 3                                                                                                                                                                      |
| 0,88 | NPIPA7;<br>NPIPA8; PKD1P1 | nuclear pore complex interacting protein family, member A7; nuclear pore complex interacting protein family, member A8; polycystic kidney disease 1 (autosomal dominant) pseudogene 1 |
| 0,88 | KRTAP13-1                 | keratin associated protein 13-1                                                                                                                                                       |
| 0,88 | DCAF8                     | DDB1 and CUL4 associated factor 8                                                                                                                                                     |
| 0,88 | ATP5S                     | ATP synthase, H <sup>+</sup> transporting, mitochondrial Fo complex subunit s (factor B)                                                                                              |
| 0,88 | CPEB3                     | Transcript Identified by AceView, Entrez Gene ID(s) 22849                                                                                                                             |
| 0,88 | C9orf24                   | chromosome 9 open reading frame 24                                                                                                                                                    |
| 0,88 | PAPPA                     | pregnancy-associated plasma protein A, pappalysin 1                                                                                                                                   |
| 0,88 | SSMEM1                    | serine-rich single-pass membrane protein 1                                                                                                                                            |
| 0,88 | ERO1B                     | endoplasmic reticulum oxidoreductase beta                                                                                                                                             |
| 0,88 | BTN2A2                    | butyrophilin, subfamily 2, member A2                                                                                                                                                  |
| 0,88 | PCMTD2                    | protein-L-isoaspartate (D-aspartate) O-methyltransferase domain containing 2                                                                                                          |
| 0,88 | SLC28A3                   | solute carrier family 28 (concentrative nucleoside transporter), member 3                                                                                                             |
| 0,88 | GPR82                     | G protein-coupled receptor 82                                                                                                                                                         |
| 0,88 | SLC26A9                   | solute carrier family 26 (anion exchanger), member 9                                                                                                                                  |
| 0,88 | TACC3                     | transforming, acidic coiled-coil containing protein 3                                                                                                                                 |
| 0,88 | A4GNT                     | alpha-1,4-N-acetylglucosaminyltransferase                                                                                                                                             |
| 0,88 | CEMP1                     | cementum protein 1                                                                                                                                                                    |
| 0,88 | NACAD                     | NAC alpha domain containing                                                                                                                                                           |
| 0,88 | SSH2                      | slingshot protein phosphatase 2                                                                                                                                                       |
| 0,88 | PRR7                      | proline rich 7 (synaptic)                                                                                                                                                             |
| 0,88 | IL15                      | interleukin 15                                                                                                                                                                        |
| 0,88 | DMXL2                     | Dmx-like 2                                                                                                                                                                            |
| 0,88 | RASAL2                    | RAS protein activator like 2                                                                                                                                                          |
| 0,88 | GPR139                    | G protein-coupled receptor 139                                                                                                                                                        |
| 0,88 | LRRC37A4P                 | leucine rich repeat containing 37, member A4, pseudogene                                                                                                                              |
| 0,88 | TRPM4                     | transient receptor potential cation channel, subfamily M, member 4                                                                                                                    |

|      |                   |                                                                                                                                                                                                                         |
|------|-------------------|-------------------------------------------------------------------------------------------------------------------------------------------------------------------------------------------------------------------------|
| 0,88 | KIAA1804;<br>MLK4 | mixed lineage kinase 4; Mitogen-activated protein kinase kinase kinase MLK4 [Source:UniProtKB/Swiss-Prot;Acc:Q5TCX8]; Salzman2013 ANNOTATED, CDS, coding, INTERNAL, OVCODE, OVEXON best transcript NM_032435            |
| 0,88 | SLC25A25          | solute carrier family 25 (mitochondrial carrier; phosphate carrier), member 25                                                                                                                                          |
| 0,88 | HCST              | hematopoietic cell signal transducer                                                                                                                                                                                    |
| 0,88 | NPB               | neuropeptide B                                                                                                                                                                                                          |
| 0,88 | SPTSSA            | serine palmitoyltransferase, small subunit A                                                                                                                                                                            |
| 0,88 | GP1BB; SEPT5      | glycoprotein Ib (platelet), beta polypeptide; septin 5                                                                                                                                                                  |
| 0,88 | BICD1             | bicaudal D homolog 1 (Drosophila)                                                                                                                                                                                       |
| 0,88 | ALG12             | ALG12, alpha-1,6-mannosyltransferase                                                                                                                                                                                    |
| 0,88 | PHC1              | Homo sapiens polyhomeotic homolog 1 (Drosophila), mRNA (cDNA clone MGC:87926 IMAGE:5788132), complete cds.; Homo sapiens polyhomeotic homolog 1 (Drosophila), mRNA (cDNA clone MGC:189745 IMAGE:9057069), complete cds. |
| 0,88 | SLC2A12           | solute carrier family 2 (facilitated glucose transporter), member 12                                                                                                                                                    |
| 0,88 | CACFD1            | calcium channel flower domain containing 1                                                                                                                                                                              |
| 0,88 | CAMSAP1           | calmodulin regulated spectrin-associated protein 1                                                                                                                                                                      |
| 0,88 | KLK2              | kallikrein related peptidase 2                                                                                                                                                                                          |
| 0,88 | C17orf105         | chromosome 17 open reading frame 105                                                                                                                                                                                    |
| 0,88 | ISCA2             | iron-sulfur cluster assembly 2                                                                                                                                                                                          |
| 0,88 | LPCAT1            | lysophosphatidylcholine acyltransferase 1                                                                                                                                                                               |
| 0,88 | DSC3              | desmocollin 3                                                                                                                                                                                                           |
| 0,88 | CDT1              | chromatin licensing and DNA replication factor 1                                                                                                                                                                        |
| 0,88 | GSTA2             | glutathione S-transferase alpha 2                                                                                                                                                                                       |
| 0,88 | GIMAP2            | GTPase, IMAP family member 2                                                                                                                                                                                            |
| 0,88 | CYP8B1            | cytochrome P450, family 8, subfamily B, polypeptide 1                                                                                                                                                                   |
| 0,88 | MC4R              | melanocortin 4 receptor                                                                                                                                                                                                 |
| 0,88 | CSF2RA            | colony stimulating factor 2 receptor, alpha, low-affinity (granulocyte-macrophage)                                                                                                                                      |
| 0,88 | OR10C1            | olfactory receptor, family 10, subfamily C, member 1 (gene/pseudogene)                                                                                                                                                  |
| 0,88 | CMTM4             | CKLF-like MARVEL transmembrane domain containing 4                                                                                                                                                                      |
| 0,88 | SERTAD3           | SERTA domain containing 3                                                                                                                                                                                               |
| 0,88 | GOLGA4            | golgin A4                                                                                                                                                                                                               |
| 0,88 | MRGPRG            | MAS-related GPR, member G                                                                                                                                                                                               |
| 0,88 | HYOU1             | hypoxia up-regulated 1                                                                                                                                                                                                  |
| 0,88 | SMOC1             | SPARC related modular calcium binding 1                                                                                                                                                                                 |
| 0,88 | SEMA4D            | Memczak2013 ANTISENSE, coding, INTERNAL, UTR3 best transcript NM_006378                                                                                                                                                 |
| 0,88 | MUSK              | muscle, skeletal, receptor tyrosine kinase                                                                                                                                                                              |
| 0,88 | GDF5              | growth differentiation factor 5                                                                                                                                                                                         |
| 0,88 | TANC1             | tetratricopeptide repeat, ankyrin repeat and coiled-coil containing 1                                                                                                                                                   |

|      |                        |                                                                                                                                 |
|------|------------------------|---------------------------------------------------------------------------------------------------------------------------------|
| 0,88 | ARTN                   | artemin                                                                                                                         |
| 0,88 | NBPF19                 | neuroblastoma breakpoint family, member 19                                                                                      |
| 0,88 | PPM1J                  | protein phosphatase, Mg <sup>2+</sup> /Mn <sup>2+</sup> dependent, 1J                                                           |
| 0,88 | FAM24A                 | family with sequence similarity 24, member A                                                                                    |
| 0,88 | MTFP1                  | mitochondrial fission process 1                                                                                                 |
| 0,88 | CGB; CGB5              | chorionic gonadotropin, beta polypeptide; chorionic gonadotropin, beta polypeptide 5                                            |
| 0,88 | CNN3                   | calponin 3, acidic                                                                                                              |
| 0,88 | GTF2E2                 | general transcription factor IIE subunit 2                                                                                      |
| 0,88 | CHRNA4                 | cholinergic receptor, nicotinic delta                                                                                           |
| 0,88 | MIR6809; TNS1          | microRNA 6809; tensin 1                                                                                                         |
| 0,88 | MYL6                   | myosin light chain 6                                                                                                            |
| 0,88 | DGKD                   | diacylglycerol kinase, delta 130kDa                                                                                             |
| 0,88 | SHPRH                  | SNF2 histone linker PHD RING helicase, E3 ubiquitin protein ligase                                                              |
| 0,88 | PCDH19                 | protocadherin 19                                                                                                                |
| 0,88 | PDE3A                  | phosphodiesterase 3A, cGMP-inhibited                                                                                            |
| 0,88 | UTP20                  | UTP20 small subunit (SSU) processome component                                                                                  |
| 0,88 | ARSJ                   | arylsulfatase family, member J                                                                                                  |
| 0,88 | DHX33                  | DEAH (Asp-Glu-Ala-His) box polypeptide 33                                                                                       |
| 0,88 | RAB13                  | RAB13, member RAS oncogene family                                                                                               |
| 0,88 | SPAG7                  | sperm associated antigen 7                                                                                                      |
| 0,88 | ANKRD36C               | ankyrin repeat domain 36C                                                                                                       |
| 0,88 | GPX1                   | glutathione peroxidase 1                                                                                                        |
| 0,88 | MLXIP                  | MLX interacting protein                                                                                                         |
| 0,88 | DUSP23                 | dual specificity phosphatase 23                                                                                                 |
| 0,88 | CHST8                  | carbohydrate (N-acetylgalactosamine 4-0) sulfotransferase 8                                                                     |
| 0,88 | LRP6                   | LDL receptor related protein 6                                                                                                  |
| 0,88 | GRIK3                  | glutamate receptor, ionotropic, kainate 3                                                                                       |
| 0,88 | TRIM33                 | tripartite motif containing 33                                                                                                  |
| 0,88 | PRICKLE2               | prickle homolog 2                                                                                                               |
| 0,88 | OGFOD3                 | 2-oxoglutarate and iron-dependent oxygenase domain containing 3                                                                 |
| 0,88 | FAM135A                | family with sequence similarity 135, member A                                                                                   |
| 0,88 | PAOX                   | polyamine oxidase (exo-N4-amino)                                                                                                |
| 0,88 | WDR63                  | WD repeat domain 63                                                                                                             |
| 0,88 | FAHD1                  | fumarylacetoacetate hydrolase domain containing 1                                                                               |
| 0,88 | OR13H1                 | olfactory receptor, family 13, subfamily H, member 1                                                                            |
| 0,88 | SCN10A                 | sodium channel, voltage gated, type X alpha subunit                                                                             |
| 0,88 | GSN                    | gelsolin                                                                                                                        |
| 0,88 | ESPN                   | espin                                                                                                                           |
| 0,88 | PAH                    | phenylalanine hydroxylase                                                                                                       |
| 0,88 | BAZ2A                  | bromodomain adjacent to zinc finger domain 2A                                                                                   |
| 0,88 | ZNF556                 | zinc finger protein 556                                                                                                         |
| 0,88 | ATAD2                  | ATPase family, AAA domain containing 2                                                                                          |
| 0,88 | LOC340074; CTC321K16.4 | uncharacterized LOC340074; Transcript Identified by AceView, Entrez Gene ID(s) 340074, RefSeq ID(s) NR_027127; novel transcript |
| 0,88 | ARHGAP19               | Rho GTPase activating protein 19                                                                                                |

|      |                                        |                                                                                                                           |
|------|----------------------------------------|---------------------------------------------------------------------------------------------------------------------------|
| 0,88 | SLC38A7                                | solute carrier family 38, member 7                                                                                        |
| 0,88 | RASA4                                  | RAS p21 protein activator 4                                                                                               |
| 0,88 | GJC1                                   | gap junction protein gamma 1                                                                                              |
| 0,88 | OR4S2                                  | olfactory receptor, family 4, subfamily S, member 2                                                                       |
| 0,88 | LRRC37A3                               | leucine rich repeat containing 37, member A3                                                                              |
| 0,88 | UNC5C                                  | unc-5 netrin receptor C                                                                                                   |
| 0,88 | CD200R1L                               | CD200 receptor 1 like                                                                                                     |
| 0,88 | STX16-NPEPL1                           | STX16-NPEPL1 readthrough (NMD candidate)                                                                                  |
| 0,88 | ZBED8                                  | zinc finger, BED-type containing 8                                                                                        |
| 0,88 | HMCN2                                  | hemicentin 2                                                                                                              |
| 0,88 | PARD6G                                 | par-6 family cell polarity regulator gamma                                                                                |
| 0,88 | BEST3                                  | bestrophin 3                                                                                                              |
| 0,88 | PCDHB13                                | protocadherin beta 13                                                                                                     |
| 0,88 | TMF1                                   | TATA element modulatory factor 1                                                                                          |
| 0,88 | CXCR3                                  | chemokine (C-X-C motif) receptor 3                                                                                        |
| 0,88 | HDDC2                                  | HD domain containing 2                                                                                                    |
| 0,88 | CWF19L1;<br>SNORA12                    | CWF19-like 1, cell cycle control (S. pombe); small nucleolar RNA, H/ACA box 12                                            |
| 0,88 | SMARCA4                                | SWI/SNF related, matrix associated, actin dependent regulator of chromatin, subfamily a, member 4                         |
| 0,88 | ZNF507                                 | zinc finger protein 507                                                                                                   |
| 0,88 | DLEU1                                  | deleted in lymphocytic leukemia 1 (non-protein coding)                                                                    |
| 0,88 | C1orf186                               | chromosome 1 open reading frame 186                                                                                       |
| 0,88 | HMBS                                   | hydroxymethylbilane synthase                                                                                              |
| 0,88 | C11orf87                               | chromosome 11 open reading frame 87                                                                                       |
| 0,88 | CORO2B                                 | Memczak2013 ALT_ACCEPTOR, ALT_DONOR, coding, INTERNAL, intronic best transcript NM_001190457                              |
| 0,88 | HSPB2;<br>C11orf52; HSPB2-<br>C11orf52 | heat shock 27kDa protein 2; chromosome 11 open reading frame 52; HSPB2-C11orf52 readthrough (NMD candidate)               |
| 0,88 | SLC25A26                               | solute carrier family 25 (S-adenosylmethionine carrier), member 26                                                        |
| 0,88 | ECHS1                                  | enoyl-CoA hydratase, short chain, 1, mitochondrial                                                                        |
| 0,88 | OR52D1                                 | olfactory receptor, family 52, subfamily D, member 1                                                                      |
| 0,88 | PPARGC1A                               | peroxisome proliferator-activated receptor gamma, coactivator 1 alpha                                                     |
| 0,88 | GUCY2F                                 | guanylate cyclase 2F, retinal                                                                                             |
| 0,88 | HELLS                                  | helicase, lymphoid-specific                                                                                               |
| 0,88 | C9orf163                               | chromosome 9 open reading frame 163                                                                                       |
| 0,88 | LOC650293                              | seven transmembrane helix receptor; Transcript Identified by AceView, Entrez Gene ID(s) 650293, RefSeq ID(s) NM_001040071 |
| 0,88 | FXYP4                                  | FXYP domain containing ion transport regulator 4                                                                          |
| 0,88 | NCKAP5                                 | NCK-associated protein 5                                                                                                  |
| 0,88 | KCNJ14                                 | potassium channel, inwardly rectifying subfamily J, member 14                                                             |
| 0,88 | KIF1A                                  | kinesin family member 1A                                                                                                  |
| 0,88 | MRPS12                                 | mitochondrial ribosomal protein S12                                                                                       |

|      |                               |                                                                              |
|------|-------------------------------|------------------------------------------------------------------------------|
| 0,88 | GLRA2                         | glycine receptor alpha 2                                                     |
| 0,88 | SCAPER                        | S-phase cyclin A-associated protein in the ER                                |
| 0,88 | EPHB1                         | EPH receptor B1                                                              |
| 0,88 | KRT76                         | keratin 76, type II                                                          |
| 0,88 | TMEM254                       | transmembrane protein 254                                                    |
| 0,88 | ZNF224                        | zinc finger protein 224                                                      |
| 0,88 | PLCXD3                        | phosphatidylinositol-specific phospholipase C, X domain containing 3         |
| 0,88 | STK32C                        | serine/threonine kinase 32C                                                  |
| 0,88 | ANGPTL3                       | angiopoietin like 3                                                          |
| 0,88 | HSD11B1L;<br>RPL36            | hydroxysteroid (11-beta) dehydrogenase 1-like;<br>ribosomal protein L36      |
| 0,88 | ALKBH4                        | alkB homolog 4, lysine demethylase                                           |
| 0,88 | KBTD7                         | kelch repeat and BTB (POZ) domain containing 7                               |
| 0,88 | TNFRSF19                      | tumor necrosis factor receptor superfamily, member 19                        |
| 0,88 | CNFN                          | cornifelin                                                                   |
| 0,88 | TTC9                          | tetratricopeptide repeat domain 9                                            |
| 0,88 | RORC                          | RAR-related orphan receptor C                                                |
| 0,88 | C3orf20                       | chromosome 3 open reading frame 20                                           |
| 0,88 | RFX3                          | regulatory factor X, 3 (influences HLA class II expression)                  |
| 0,88 | NPTN                          | neuroplastin                                                                 |
| 0,88 | SSFA2                         | sperm specific antigen 2                                                     |
| 0,88 | LINC00336                     | long intergenic non-protein coding RNA 336                                   |
| 0,88 | UBR5                          | ubiquitin protein ligase E3 component n-recogin 5                            |
| 0,88 | CARS2                         | cysteinyl-tRNA synthetase 2, mitochondrial (putative)                        |
| 0,88 | VPS8                          | Transcript Identified by AceView, Entrez Gene ID(s)<br>23355                 |
| 0,88 | STRBP;<br>MIR600HG;<br>MIR600 | spermatid perinuclear RNA binding protein; MIR600<br>host gene; microRNA 600 |
| 0,88 | KRTAP12-1                     | keratin associated protein 12-1                                              |
| 0,88 | FAM210B                       | family with sequence similarity 210, member B                                |
| 0,88 | RAB20                         | RAB20, member RAS oncogene family                                            |
| 0,88 | NEUROG1                       | neurogenin 1                                                                 |
| 0,88 | LRRC19                        | leucine rich repeat containing 19                                            |
| 0,88 | PICK1                         | protein interacting with PRKCA 1                                             |
| 0,88 | FBLN1                         | fibulin 1                                                                    |
| 0,88 | SPATA41                       | spermatogenesis associated 41 (non-protein coding)                           |
| 0,88 | FBXW11                        | F-box and WD repeat domain containing 11                                     |
| 0,88 | GSTO2                         | glutathione S-transferase omega 2                                            |
| 0,88 | PGAM5                         | PGAM family member 5, serine/threonine protein<br>phosphatase, mitochondrial |
| 0,88 | C3orf38                       | chromosome 3 open reading frame 38                                           |
| 0,88 | BACE2                         | beta-site APP-cleaving enzyme 2                                              |
| 0,88 | CERCAM                        | cerebral endothelial cell adhesion molecule                                  |
| 0,88 | SUN1                          | Sad1 and UNC84 domain containing 1                                           |
| 0,88 | ZBTB25                        | zinc finger and BTB domain containing 25                                     |
| 0,88 | RXFP4                         | relaxin/insulin-like family peptide receptor 4                               |

|      |                                  |                                                                                                                                              |
|------|----------------------------------|----------------------------------------------------------------------------------------------------------------------------------------------|
| 0,88 | SRF                              | serum response factor                                                                                                                        |
| 0,88 | PRAMEF8                          | PRAME family member 8                                                                                                                        |
| 0,88 | PELI2                            | pellino E3 ubiquitin protein ligase family member 2                                                                                          |
| 0,88 | ZNF746                           | zinc finger protein 746                                                                                                                      |
| 0,88 | C15orf62                         | chromosome 15 open reading frame 62                                                                                                          |
| 0,88 | GALR2                            | galanin receptor 2                                                                                                                           |
| 0,88 | MTCH1                            | mitochondrial carrier 1                                                                                                                      |
| 0,88 | HOXD13                           | homeobox D13                                                                                                                                 |
| 0,88 | ALDH1L1-AS1                      | ALDH1L1 antisense RNA 1                                                                                                                      |
| 0,87 | PIK3R3                           | phosphoinositide-3-kinase, regulatory subunit 3 (gamma)                                                                                      |
| 0,87 | ONECUT1                          | one cut homeobox 1                                                                                                                           |
| 0,87 | APCDD1L                          | adenomatosis polyposis coli down-regulated 1-like                                                                                            |
| 0,87 | FAM131B                          | family with sequence similarity 131, member B                                                                                                |
| 0,87 | ZNF184                           | zinc finger protein 184                                                                                                                      |
| 0,87 | LOC101927322;<br>RP11-126O1.5    | uncharacterized LOC101927322; novel transcript, antisense to MALT1                                                                           |
| 0,87 | ZNF638                           | Transcript Identified by AceView, Entrez Gene ID(s) 27332                                                                                    |
| 0,87 | DECR1                            | 2,4-dienoyl-CoA reductase 1, mitochondrial                                                                                                   |
| 0,87 | CACFD1                           | calcium channel flower domain containing 1                                                                                                   |
| 0,87 | LHFPL1                           | lipoma HMGIC fusion partner-like 1                                                                                                           |
| 0,87 | KCNMB2                           | potassium channel subfamily M regulatory beta subunit 2                                                                                      |
| 0,87 | C1orf226                         | chromosome 1 open reading frame 226                                                                                                          |
| 0,87 | ATP8B4                           | ATPase, class I, type 8B, member 4                                                                                                           |
| 0,87 | NELFB                            | negative elongation factor complex member B                                                                                                  |
| 0,87 | CASR                             | calcium-sensing receptor                                                                                                                     |
| 0,87 | NOTCH2NL                         | notch 2 N-terminal like                                                                                                                      |
| 0,87 | USP32P2;<br>FAM106A;<br>CCDC144B | ubiquitin specific peptidase 32 pseudogene 2; family with sequence similarity 106, member A; coiled-coil domain containing 144B (pseudogene) |
| 0,87 | TRMU                             | tRNA 5-methylaminomethyl-2-thiouridylate methyltransferase                                                                                   |
| 0,87 | RFWD2                            | ring finger and WD repeat domain 2, E3 ubiquitin protein ligase                                                                              |
| 0,87 | SH3RF1                           | SH3 domain containing ring finger 1                                                                                                          |
| 0,87 | KAT2B                            | K(lysine) acetyltransferase 2B                                                                                                               |
| 0,87 | NUP210                           | nucleoporin 210kDa                                                                                                                           |
| 0,87 | RPP25                            | ribonuclease P/MRP 25kDa subunit                                                                                                             |
| 0,87 | ZNF846                           | zinc finger protein 846                                                                                                                      |
| 0,87 | HAVCR1                           | hepatitis A virus cellular receptor 1                                                                                                        |
| 0,87 | P3H4                             | prolyl 3-hydroxylase family member 4 (non-enzymatic)                                                                                         |
| 0,87 | ago-03                           | argonaute RISC catalytic component 3                                                                                                         |
| 0,87 | SVBP                             | small vasohibin binding protein                                                                                                              |
| 0,87 | HESX1                            | HESX homeobox 1                                                                                                                              |
| 0,87 | NRIP1                            | nuclear receptor interacting protein 1                                                                                                       |
| 0,87 | SUCO                             | SUN domain containing ossification factor                                                                                                    |

|      |                    |                                                                                                   |
|------|--------------------|---------------------------------------------------------------------------------------------------|
| 0,87 | ZMYM6NB;<br>ZMYM6  | ZMYM6 neighbor; zinc finger, MYM-type 6                                                           |
| 0,87 | C2orf16            | chromosome 2 open reading frame 16                                                                |
| 0,87 | DEFB103A           | defensin, beta 103A                                                                               |
| 0,87 | PIANP              | PILR alpha associated neural protein                                                              |
| 0,87 | GJC3               | gap junction protein gamma 3                                                                      |
| 0,87 | ZNF609             | zinc finger protein 609                                                                           |
| 0,87 | COX18              | COX18 cytochrome c oxidase assembly factor                                                        |
| 0,87 | MCC                | mutated in colorectal cancers                                                                     |
| 0,87 | NFU1               | NFU1 iron-sulfur cluster scaffold                                                                 |
| 0,87 | RPS29              | ribosomal protein S29                                                                             |
| 0,87 | SSUH2              | ssu-2 homolog (C. elegans)                                                                        |
| 0,87 | PANK2              | pantothenate kinase 2                                                                             |
| 0,87 | IFT52              | intraflagellar transport 52                                                                       |
| 0,87 | DUPD1              | dual specificity phosphatase and pro isomerase domain containing 1                                |
| 0,87 | TRIM45             | tripartite motif containing 45                                                                    |
| 0,87 | NINL               | ninein-like                                                                                       |
| 0,87 | NLK                | nemo-like kinase                                                                                  |
| 0,87 | RPL7A              | ribosomal protein L7a                                                                             |
| 0,87 | TBKBP1             | TBK1 binding protein 1                                                                            |
| 0,87 | ZNF853             | zinc finger protein 853                                                                           |
| 0,87 | RBP2               | retinol binding protein 2, cellular                                                               |
| 0,87 | CPB1               | carboxypeptidase B1 (tissue)                                                                      |
| 0,87 | PRIMA1             | proline rich membrane anchor 1                                                                    |
| 0,87 | SMARCD2            | SWI/SNF related, matrix associated, actin dependent regulator of chromatin, subfamily d, member 2 |
| 0,87 | ART1               | ADP-ribosyltransferase 1                                                                          |
| 0,87 | SPINT3             | serine peptidase inhibitor, Kunitz type, 3                                                        |
| 0,87 | ELFN1              | extracellular leucine-rich repeat and fibronectin type III domain containing 1                    |
| 0,87 | MIR659;<br>ANKRD54 | microRNA 659; ankyrin repeat domain 54                                                            |
| 0,87 | FAM175A            | family with sequence similarity 175, member A                                                     |
| 0,87 | KIAA1522           | KIAA1522                                                                                          |
| 0,87 | GSTM2              | glutathione S-transferase mu 2 (muscle)                                                           |
| 0,87 | NR0B2              | nuclear receptor subfamily 0, group B, member 2                                                   |
| 0,87 | P2RY12             | purinergic receptor P2Y, G-protein coupled, 12                                                    |
| 0,87 | GPR148             | G protein-coupled receptor 148                                                                    |
| 0,87 | SMR3B              | submaxillary gland androgen regulated protein 3B                                                  |
| 0,87 | CEP70              | centrosomal protein 70kDa                                                                         |
| 0,87 | SREBF1             | sterol regulatory element binding transcription factor 1                                          |
| 0,87 | TCEA3              | transcription elongation factor A (SII), 3                                                        |
| 0,87 | IGFBP4             | insulin like growth factor binding protein 4                                                      |
| 0,87 | NAPRT              | nicotinate phosphoribosyltransferase                                                              |
| 0,87 | PPM1E              | Transcript Identified by AceView, Entrez Gene ID(s)<br>22843                                      |
| 0,87 | SERP1              | stress-associated endoplasmic reticulum protein 1                                                 |
| 0,87 | MRGPRX1            | MAS-related GPR, member X1                                                                        |

|      |                           |                                                                                                      |
|------|---------------------------|------------------------------------------------------------------------------------------------------|
| 0,87 | ZKSCAN7                   | zinc finger with KRAB and SCAN domains 7                                                             |
| 0,87 | HLA-B                     | major histocompatibility complex, class I, B                                                         |
| 0,87 | SWI5                      | SWI5 homologous recombination repair protein                                                         |
| 0,87 | CCDC113                   | coiled-coil domain containing 113                                                                    |
| 0,87 | CENPH                     | centromere protein H                                                                                 |
| 0,87 | SIPA1L1                   | signal-induced proliferation-associated 1 like 1                                                     |
| 0,87 | ATXN3                     | ataxin 3                                                                                             |
| 0,87 | DNAJC7                    | DnaJ (Hsp40) homolog, subfamily C, member 7                                                          |
| 0,87 | TMSB15A                   | thymosin beta 15a                                                                                    |
| 0,87 | TRPC3                     | transient receptor potential cation channel, subfamily C, member 3                                   |
| 0,87 | MPPED1                    | metallophosphoesterase domain containing 1                                                           |
| 0,87 | RAB23                     | RAB23, member RAS oncogene family                                                                    |
| 0,87 | HECTD2                    | HECT domain containing E3 ubiquitin protein ligase 2                                                 |
| 0,87 | SLC14A1                   | solute carrier family 14 (urea transporter), member 1 (Kidd blood group)                             |
| 0,87 | SQSTM1                    | Transcript Identified by AceView, Entrez Gene ID(s) 8878                                             |
| 0,87 | GHR                       | growth hormone receptor                                                                              |
| 0,87 | ESX1                      | ESX homeobox 1                                                                                       |
| 0,87 | LIF                       | leukemia inhibitory factor                                                                           |
| 0,87 | DPYSL4                    | dihydropyrimidinase-like 4                                                                           |
| 0,87 | RNF214                    | ring finger protein 214                                                                              |
| 0,87 | CCDC65                    | coiled-coil domain containing 65                                                                     |
| 0,87 | TSHZ2                     | teashirt zinc finger homeobox 2                                                                      |
| 0,87 | ARHGAP42                  | Rho GTPase activating protein 42                                                                     |
| 0,87 | PKD3                      | pyruvate dehydrogenase kinase, isozyme 3                                                             |
| 0,87 | CNPY4                     | canopy FGF signaling regulator 4                                                                     |
| 0,87 | RP11-499E18.1;<br>SLC39A8 | novel transcript; Transcript Identified by AceView, Entrez Gene ID(s) 64116                          |
| 0,87 | KLHL40                    | kelch-like family member 40                                                                          |
| 0,87 | NFKBIL1                   | nuclear factor of kappa light polypeptide gene enhancer in B-cells inhibitor-like 1                  |
| 0,87 | RBM26                     | Transcript Identified by AceView, Entrez Gene ID(s) 64062                                            |
| 0,87 | SPACA6                    | sperm acrosome associated 6                                                                          |
| 0,87 | ANKK1                     | ankyrin repeat and kinase domain containing 1                                                        |
| 0,87 | C2orf91                   | chromosome 2 open reading frame 91                                                                   |
| 0,87 | POLR2G                    | polymerase (RNA) II (DNA directed) polypeptide G                                                     |
| 0,87 | GCN1; MIR4498             | GCN1 eIF2 alpha kinase activator homolog; microRNA 4498                                              |
| 0,87 | KRT222                    | keratin 222, type II                                                                                 |
| 0,87 | TBCD                      | tubulin folding cofactor D                                                                           |
| 0,87 | ZNF135                    | zinc finger protein 135                                                                              |
| 0,87 | LCN6                      | lipocalin 6                                                                                          |
| 0,87 | SRD5A2                    | steroid-5-alpha-reductase, alpha polypeptide 2 (3-oxo-5 alpha-steroid delta 4-dehydrogenase alpha 2) |
| 0,87 | PCNXL3                    | pecanex-like 3 (Drosophila)                                                                          |
| 0,87 | NSUN6                     | NOP2/Sun domain family, member 6                                                                     |

|      |                    |                                                                                      |
|------|--------------------|--------------------------------------------------------------------------------------|
| 0,87 | CDH20              | cadherin 20, type 2                                                                  |
| 0,87 | MAP1LC3B           | microtubule-associated protein 1 light chain 3 beta                                  |
| 0,87 | FIBIN              | fin bud initiation factor homolog (zebrafish)                                        |
| 0,87 | PGLYRP4            | peptidoglycan recognition protein 4                                                  |
| 0,87 | HAUS4;<br>MIR4707  | HAUS augmin like complex subunit 4; microRNA 4707                                    |
| 0,87 | GPR153             | G protein-coupled receptor 153                                                       |
| 0,87 | ZHX3               | zinc fingers and homeoboxes 3                                                        |
| 0,87 | TAS2R31            | taste receptor, type 2, member 31                                                    |
| 0,87 | ATP11A             | ATPase, class VI, type 11A                                                           |
| 0,87 | AC171558.1         | Olfactory receptor 4N4 [Source:UniProtKB/Swiss-Prot;Acc:Q8N0Y3]                      |
| 0,87 | GPR88              | G protein-coupled receptor 88                                                        |
| 0,87 | CARD11             | caspase recruitment domain family, member 11                                         |
| 0,87 | LIN54              | lin-54 DREAM MuvB core complex component                                             |
| 0,87 | DHRS12             | dehydrogenase/reductase (SDR family) member 12                                       |
| 0,87 | CLTCL1             | clathrin, heavy chain-like 1                                                         |
| 0,87 | MYO1G              | myosin IG                                                                            |
| 0,87 | IGSF3              | immunoglobulin superfamily, member 3                                                 |
| 0,87 | CYLD               | cylindromatosis (turban tumor syndrome)                                              |
| 0,87 | CHST3              | carbohydrate (chondroitin 6) sulfotransferase 3                                      |
| 0,87 | WDR33              | WD repeat domain 33                                                                  |
| 0,87 | NUDT16             | nudix hydrolase 16                                                                   |
| 0,87 | LYL1               | lymphoblastic leukemia associated hematopoiesis regulator 1                          |
| 0,87 | BAHD1              | bromo adjacent homology domain containing 1                                          |
| 0,87 | HECTD1             | HECT domain containing E3 ubiquitin protein ligase 1                                 |
| 0,87 | CAPSL              | calcyphosine-like                                                                    |
| 0,87 | OR13G1             | olfactory receptor, family 13, subfamily G, member 1                                 |
| 0,87 | PTGER1             | prostaglandin E receptor 1                                                           |
| 0,87 | MFI2               | antigen p97 (melanoma associated) identified by monoclonal antibodies 133.2 and 96.5 |
| 0,87 | SAG                | S-antigen; retina and pineal gland (arrestin)                                        |
| 0,87 | MECP2              | methyl-CpG binding protein 2                                                         |
| 0,87 | DEFB124            | defensin, beta 124                                                                   |
| 0,87 | LINC01620          | long intergenic non-protein coding RNA 1620                                          |
| 0,87 | DNMT1              | DNA (cytosine-5-)-methyltransferase 1                                                |
| 0,87 | LACC1              | laccase (multicopper oxidoreductase) domain containing 1                             |
| 0,87 | DGKD               | diacylglycerol kinase, delta 130kDa                                                  |
| 0,87 | AKAP13;<br>MIR7706 | A kinase (PRKA) anchor protein 13; microRNA 7706                                     |
| 0,87 | FAM212B            | family with sequence similarity 212, member B                                        |
| 0,87 | FAM64A             | family with sequence similarity 64, member A                                         |
| 0,87 | ATXN7L3            | ataxin 7-like 3                                                                      |
| 0,87 | UCN2               | urocortin 2                                                                          |
| 0,87 | PAN3; RNU6-82P     | PAN3 poly(A) specific ribonuclease subunit; RNA, U6 small nuclear 82, pseudogene     |
| 0,87 | LAMB1              | laminin, beta 1                                                                      |

|      |                       |                                                                                                           |
|------|-----------------------|-----------------------------------------------------------------------------------------------------------|
| 0,87 | FAM209A               | family with sequence similarity 209, member A                                                             |
| 0,87 | FOXP1; RP11-298C2.1   | Transcript Identified by AceView, Entrez Gene ID(s) 27086; novel transcript, sense intronic to FOXP1      |
| 0,87 | KPNA6                 | Jeck2013 ALT_ACCEPTOR, ALT_DONOR, coding, INTERNAL, intronic best transcript NM_012316                    |
| 0,87 | GM2A                  | GM2 ganglioside activator                                                                                 |
| 0,87 | RRP36                 | ribosomal RNA processing 36                                                                               |
| 0,87 | RAD51AP2              | Transcript Identified by AceView, Entrez Gene ID(s) 729475                                                |
| 0,87 | CD300E                | CD300e molecule                                                                                           |
| 0,87 | DCHS1                 | dachsous cadherin-related 1                                                                               |
| 0,87 | ZNF526                | zinc finger protein 526                                                                                   |
| 0,87 | C1QTNF6               | C1q and tumor necrosis factor related protein 6                                                           |
| 0,87 | MS4A15                | membrane-spanning 4-domains, subfamily A, member 15                                                       |
| 0,87 | BBS7                  | Bardet-Biedl syndrome 7                                                                                   |
| 0,87 | PLEKHM3               | pleckstrin homology domain containing, family M, member 3                                                 |
| 0,87 | GOLGA6L5P; GOLGA6L17P | golgin A6 family-like 5, pseudogene; golgin A6 family-like 17, pseudogene                                 |
| 0,87 | MAEL                  | maelstrom spermatogenic transposon silencer                                                               |
| 0,87 | KCTD4                 | potassium channel tetramerization domain containing 4                                                     |
| 0,87 | PLEC                  | plectin                                                                                                   |
| 0,87 | PPFIA2                | protein tyrosine phosphatase, receptor type, f polypeptide (PTPRF), interacting protein (liprin), alpha 2 |
| 0,87 | C1S                   | complement component 1, s subcomponent                                                                    |
| 0,87 | OTUB2                 | OTU deubiquitinase, ubiquitin aldehyde binding 2                                                          |
| 0,87 | ZNF740                | zinc finger protein 740                                                                                   |
| 0,87 | ELF2                  | E74-like factor 2 (ets domain transcription factor)                                                       |
| 0,87 | WDFY2                 | WD repeat and FYVE domain containing 2                                                                    |
| 0,87 | EP400; SNORA49        | E1A binding protein p400; small nucleolar RNA, H/ACA box 49                                               |
| 0,87 | MROH2A                | maestro heat-like repeat family member 2A                                                                 |
| 0,87 | ADCY2                 | Transcript Identified by AceView, Entrez Gene ID(s) 108                                                   |
| 0,87 | ZNFX1                 | zinc finger, NFX1-type containing 1                                                                       |
| 0,87 | ENPP2                 | ectonucleotide pyrophosphatase/phosphodiesterase 2                                                        |
| 0,87 | ONECUT3               | one cut homeobox 3                                                                                        |
| 0,87 | PC                    | Memczak2013 ALT_ACCEPTOR, ALT_DONOR, coding, INTERNAL, intronic best transcript NM_022172                 |
| 0,87 | UBA1; tydee           | Memczak2013 ANTISENSE, CDS, coding, INTERNAL best transcript NM_153280; Transcript Identified by AceView  |
| 0,87 | CSAG1                 | chondrosarcoma associated gene 1                                                                          |
| 0,87 | SRGN                  | Memczak2013 ANTISENSE, coding, INTERNAL, UTR3 best transcript NM_002727                                   |
| 0,87 | LILRB4                | leukocyte immunoglobulin-like receptor, subfamily B (with TM and ITIM domains), member 4                  |

|      |                      |                                                                                         |
|------|----------------------|-----------------------------------------------------------------------------------------|
| 0,87 | GAREM1               | GRB2 associated regulator of MAPK1 1                                                    |
| 0,87 | TSC22D3              | TSC22 domain family, member 3                                                           |
| 0,87 | UGGT1                | UDP-glucose glycoprotein glucosyltransferase 1                                          |
| 0,87 | RABL2A               | RAB, member of RAS oncogene family-like 2A                                              |
| 0,87 | GPR142               | G protein-coupled receptor 142                                                          |
| 0,87 | KNTC1                | kinetochore associated 1                                                                |
| 0,87 | HIST1H4F             | histone cluster 1, H4f                                                                  |
| 0,87 | DUXA                 | double homeobox A                                                                       |
| 0,87 | CCBL1                | cysteine conjugate-beta lyase, cytoplasmic                                              |
| 0,87 | SLC5A12              | solute carrier family 5 (sodium/monocarboxylate cotransporter), member 12               |
| 0,87 | PTK2                 | protein tyrosine kinase 2                                                               |
| 0,87 | INO80C               | INO80 complex subunit C                                                                 |
| 0,87 | SPINK14              | serine peptidase inhibitor, Kazal type 14 (putative)                                    |
| 0,87 | EMD                  | emerin                                                                                  |
| 0,87 | CHD9                 | chromodomain helicase DNA binding protein 9                                             |
| 0,87 | ZSWIM4               | zinc finger, SWIM-type containing 4                                                     |
| 0,87 | CCNG2                | cyclin G2                                                                               |
| 0,87 | C2CD4B               | C2 calcium-dependent domain containing 4B                                               |
| 0,87 | PSME4                | proteasome activator subunit 4                                                          |
| 0,87 | ERC1                 | ELKS/RAB6-interacting/CAST family member 1                                              |
| 0,87 | MFHAS1               | malignant fibrous histiocytoma amplified sequence 1                                     |
| 0,87 | SPECC1               | sperm antigen with calponin homology and coiled-coil domains 1                          |
| 0,87 | TLL1                 | tolloid like 1                                                                          |
| 0,87 | VRTN                 | vertebrae development associated                                                        |
| 0,87 | SCRIB                | Zhang2013 ALT_ACCEPTOR, ALT_DONOR, coding, INTERNAL, intronic best transcript NM_182706 |
| 0,87 | ZXDA                 | zinc finger, X-linked, duplicated A                                                     |
| 0,87 | SUPT20HL2            | SPT20 homolog, SAGA complex component-like 2                                            |
| 0,87 | S100A7               | S100 calcium binding protein A7                                                         |
| 0,87 | ARID2                | AT rich interactive domain 2 (ARID, RFX-like)                                           |
| 0,87 | ALKBH3;<br>SEC14L1P1 | alkB homolog 3, alpha-ketoglutarate-dependent dioxygenase; SEC14-like 1 pseudogene 1    |
| 0,87 | SPRR2G               | small proline-rich protein 2G                                                           |
| 0,87 | WEE2                 | WEE1 homolog 2 (S. pombe)                                                               |
| 0,87 | MAP2K5               | mitogen-activated protein kinase kinase 5                                               |
| 0,87 | DPCD                 | deleted in primary ciliary dyskinesia homolog (mouse)                                   |
| 0,87 | SETX                 | senataxin                                                                               |
| 0,87 | KLHDC7B              | kelch domain containing 7B                                                              |
| 0,87 | CCL20                | chemokine (C-C motif) ligand 20                                                         |
| 0,87 | COL12A1              | collagen, type XII, alpha 1                                                             |
| 0,87 | NGDN                 | neuroguidin, EIF4E binding protein                                                      |
| 0,87 | PLEKHG3              | pleckstrin homology domain containing, family G (with RhoGef domain) member 3           |
| 0,87 | EFNA3                | ephrin-A3                                                                               |
| 0,87 | KIAA1324             | KIAA1324                                                                                |

|      |           |                                                                                              |
|------|-----------|----------------------------------------------------------------------------------------------|
| 0,87 | PAMR1     | peptidase domain containing associated with muscle regeneration 1                            |
| 0,87 | CDKN2D    | cyclin-dependent kinase inhibitor 2D (p19, inhibits CDK4)                                    |
| 0,87 | EFHB      | EF-hand domain family, member B                                                              |
| 0,87 | FGD1      | FYVE, RhoGEF and PH domain containing 1                                                      |
| 0,87 | OSCAR     | osteoclast associated, immunoglobulin-like receptor                                          |
| 0,87 | ST5       | Transcript Identified by AceView, Entrez Gene ID(s) 6764                                     |
| 0,87 | TRIP12    | Transcript Identified by AceView, Entrez Gene ID(s) 9320                                     |
| 0,87 | CELF2     | Transcript Identified by AceView, Entrez Gene ID(s) 10659                                    |
| 0,87 | KRTAP13-2 | keratin associated protein 13-2                                                              |
| 0,87 | AKT1      | v-akt murine thymoma viral oncogene homolog 1                                                |
| 0,87 | PLET1     | placenta expressed transcript 1                                                              |
| 0,87 | ERC2      | ELKS/RAB6-interacting/CAST family member 2                                                   |
| 0,87 | OR4D2     | olfactory receptor, family 4, subfamily D, member 2                                          |
| 0,87 | DLGAP3    | discs, large (Drosophila) homolog-associated protein 3                                       |
| 0,87 | C16orf59  | chromosome 16 open reading frame 59                                                          |
| 0,87 | DHX16     | DEAH (Asp-Glu-Ala-His) box polypeptide 16                                                    |
| 0,87 | SPATA22   | spermatogenesis associated 22                                                                |
| 0,87 | ASB12     | ankyrin repeat and SOCS box containing 12                                                    |
| 0,87 | ADGRG7    | adhesion G protein-coupled receptor G7                                                       |
| 0,87 | PTPRG     | protein tyrosine phosphatase, receptor type, G                                               |
| 0,87 | KLHL29    | kelch-like family member 29                                                                  |
| 0,87 | HIGD1C    | HIG1 hypoxia inducible domain family, member 1C                                              |
| 0,87 | APOC4     | apolipoprotein C-IV                                                                          |
| 0,87 | MAGEB17   | MAGE family member B17                                                                       |
| 0,87 | AFAP1     | actin filament associated protein 1                                                          |
| 0,87 | LINC00473 | long intergenic non-protein coding RNA 473                                                   |
| 0,87 | KHDC3L    | KH domain containing 3-like, subcortical maternal complex member                             |
| 0,87 | UBE2Q2    | ubiquitin-conjugating enzyme E2Q family member 2                                             |
| 0,87 | C16orf97  | chromosome 16 open reading frame 97                                                          |
| 0,87 | MB21D2    | Mab-21 domain containing 2                                                                   |
| 0,87 | MAP3K19   | mitogen-activated protein kinase kinase kinase 19                                            |
| 0,87 | AXIN2     | axin 2                                                                                       |
| 0,87 | PLEKHG6   | pleckstrin homology domain containing, family G (with RhoGef domain) member 6                |
| 0,87 | CD53      | Memczak2013 ALT_ACCEPTOR, ALT_DONOR, coding, INTERNAL, intronic best transcript NM_001040033 |
| 0,87 | VPS13B    | vacuolar protein sorting 13 homolog B (yeast)                                                |
| 0,87 | PARP14    | poly(ADP-ribose) polymerase family member 14                                                 |
| 0,87 | ZNF503    | zinc finger protein 503                                                                      |
| 0,87 | TMEM150C  | transmembrane protein 150C                                                                   |
| 0,87 | AMFR      | autocrine motility factor receptor, E3 ubiquitin protein ligase                              |

|      |                      |                                                                                         |
|------|----------------------|-----------------------------------------------------------------------------------------|
| 0,87 | NRBP1                | nuclear receptor binding protein 1                                                      |
| 0,87 | TEC                  | tec protein tyrosine kinase                                                             |
| 0,87 | COL1A1               | collagen, type I, alpha 1                                                               |
| 0,87 | FAM171B              | family with sequence similarity 171, member B                                           |
| 0,87 | OTP                  | orthopedia homeobox                                                                     |
| 0,87 | RNF180               | ring finger protein 180                                                                 |
| 0,87 | DIP2A                | disco-interacting protein 2 homolog A                                                   |
| 0,87 | GTSCR1               | Gilles de la Tourette syndrome chromosome region, candidate 1 (non-protein coding)      |
| 0,87 | ATP1B4               | ATPase, Na <sup>+</sup> /K <sup>+</sup> transporting, beta 4 polypeptide                |
| 0,87 | MAP2K7               | mitogen-activated protein kinase kinase 7                                               |
| 0,87 | FLOT2                | Memczak2013 ANTISENSE, coding, INTERNAL, UTR3 best transcript NM_004475                 |
| 0,87 | TENM3                | teneurin transmembrane protein 3                                                        |
| 0,87 | CDK11A               | cyclin-dependent kinase 11A                                                             |
| 0,87 | VCAN                 | versican                                                                                |
| 0,87 | NDP                  | Norrie disease (pseudoglioma)                                                           |
| 0,87 | RNF145               | ring finger protein 145                                                                 |
| 0,87 | IQCE                 | IQ motif containing E                                                                   |
| 0,87 | TP53I3               | tumor protein p53 inducible protein 3                                                   |
| 0,86 | PABPC1L2A            | poly(A) binding protein, cytoplasmic 1-like 2A                                          |
| 0,86 | PMCH                 | pro-melanin-concentrating hormone                                                       |
| 0,86 | KIAA1109             | KIAA1109                                                                                |
| 0,86 | LINC01126            | long intergenic non-protein coding RNA 1126                                             |
| 0,86 | PRPF8                | pre-mRNA processing factor 8                                                            |
| 0,86 | NUDT9                | nudix hydrolase 9                                                                       |
| 0,86 | MYO7A                | myosin VIIA                                                                             |
| 0,86 | RBPMS                | RNA binding protein with multiple splicing                                              |
| 0,86 | CUL9                 | cullin 9                                                                                |
| 0,86 | ZNF143               | zinc finger protein 143                                                                 |
| 0,86 | KRTAP20-4            | keratin associated protein 20-4                                                         |
| 0,86 | C8orf37              | chromosome 8 open reading frame 37                                                      |
| 0,86 | APPL1                | adaptor protein, phosphotyrosine interaction, PH domain and leucine zipper containing 1 |
| 0,86 | INPP4B               | inositol polyphosphate-4-phosphatase type II B                                          |
| 0,86 | RP5-1198O20.4; KLF17 | Transcript Identified by AceView, Entrez Gene ID(s) 128209; novel transcript            |
| 0,86 | CDC42BPA             | CDC42 binding protein kinase alpha (DMPK-like)                                          |
| 0,86 | ZFP30                | ZFP30 zinc finger protein                                                               |
| 0,86 | LAMB2                | laminin, beta 2 (laminin S)                                                             |
| 0,86 | DPH3P1               | diphthamide biosynthesis 3 pseudogene 1                                                 |
| 0,86 | USP4                 | ubiquitin specific peptidase 4 (proto-oncogene)                                         |
| 0,86 | CFAP54               | cilia and flagella associated 54                                                        |
| 0,86 | GOLGA8A; GOLGA8B     | golgin A8 family, member A; golgin A8 family, member B                                  |
| 0,86 | HNRNPUL2             | heterogeneous nuclear ribonucleoprotein U-like 2                                        |
| 0,86 | AZIN2                | antizyme inhibitor 2                                                                    |
| 0,86 | MSANTD1              | Myb/SANT-like DNA-binding domain containing 1                                           |
| 0,86 | ZCCHC18              | zinc finger, CCHC domain containing 18                                                  |
| 0,86 | SURF1                | surfeit 1                                                                               |

|      |                                     |                                                                                                                                                                                        |
|------|-------------------------------------|----------------------------------------------------------------------------------------------------------------------------------------------------------------------------------------|
| 0,86 | ST7-AS1                             | ST7 antisense RNA 1                                                                                                                                                                    |
| 0,86 | LHFPL3                              | lipoma HMGIC fusion partner-like 3                                                                                                                                                     |
| 0,86 | CHST1                               | carbohydrate (keratan sulfate Gal-6) sulfotransferase 1                                                                                                                                |
| 0,86 | CSRNP2                              | cysteine-serine-rich nuclear protein 2                                                                                                                                                 |
| 0,86 | ZNF18                               | zinc finger protein 18                                                                                                                                                                 |
| 0,86 | FBXL7                               | F-box and leucine-rich repeat protein 7                                                                                                                                                |
| 0,86 | GCH1                                | GTP cyclohydrolase 1                                                                                                                                                                   |
| 0,86 | ADAM11                              | ADAM metalloproteinase domain 11                                                                                                                                                       |
| 0,86 | TP53INP2                            | tumor protein p53 inducible nuclear protein 2                                                                                                                                          |
| 0,86 | C10orf120                           | chromosome 10 open reading frame 120                                                                                                                                                   |
| 0,86 | BAD                                 | BCL2-associated agonist of cell death                                                                                                                                                  |
| 0,86 | XIRP2                               | xin actin binding repeat containing 2                                                                                                                                                  |
| 0,86 | OR4D9                               | olfactory receptor, family 4, subfamily D, member 9                                                                                                                                    |
| 0,86 | SPATA21                             | spermatogenesis associated 21                                                                                                                                                          |
| 0,86 | FZR1                                | fizzy/cell division cycle 20 related 1                                                                                                                                                 |
| 0,86 | CYP4F12                             | cytochrome P450, family 4, subfamily F, polypeptide 12                                                                                                                                 |
| 0,86 | MAP6                                | microtubule associated protein 6                                                                                                                                                       |
| 0,86 | LOC654841;<br>AC097662.2;<br>COL4A3 | uncharacterized LOC654841; Salzman2013<br>ANTISENSE, CDS, coding, INTERNAL, intronic,<br>OVCODE, OVERLAPTX, OVEXON best transcript<br>NM_000091; novel transcript, antisense to COL4A3 |
| 0,86 | TBC1D7                              | TBC1 domain family, member 7                                                                                                                                                           |
| 0,86 | AACS                                | acetoacetyl-CoA synthetase                                                                                                                                                             |
| 0,86 | C17orf64                            | chromosome 17 open reading frame 64                                                                                                                                                    |
| 0,86 | FTHL17                              | ferritin, heavy polypeptide-like 17                                                                                                                                                    |
| 0,86 | THBS2                               | thrombospondin 2                                                                                                                                                                       |
| 0,86 | WWC2-AS2                            | WWC2 antisense RNA 2                                                                                                                                                                   |
| 0,86 | ODF3L1                              | outer dense fiber of sperm tails 3-like 1                                                                                                                                              |
| 0,86 | EPX                                 | eosinophil peroxidase                                                                                                                                                                  |
| 0,86 | PDZK1IP1                            | PDZK1 interacting protein 1                                                                                                                                                            |
| 0,86 | LMO4                                | LIM domain only 4                                                                                                                                                                      |
| 0,86 | TNKS2                               | tankyrase, TRF1-interacting ankyrin-related ADP-<br>ribose polymerase 2                                                                                                                |
| 0,86 | SIX1                                | SIX homeobox 1                                                                                                                                                                         |
| 0,86 | JPH3                                | junctophilin 3                                                                                                                                                                         |
| 0,86 | AMZ1                                | archaelysin family metalloproteinase 1                                                                                                                                                 |
| 0,86 | USP34                               | ubiquitin specific peptidase 34                                                                                                                                                        |
| 0,86 | NSD1                                | nuclear receptor binding SET domain protein 1                                                                                                                                          |
| 0,86 | ZNF419                              | zinc finger protein 419                                                                                                                                                                |
| 0,86 | MFSD2B                              | major facilitator superfamily domain containing 2B                                                                                                                                     |
| 0,86 | MAGEB10                             | MAGE family member B10                                                                                                                                                                 |
| 0,86 | ACBD6                               | acyl-CoA binding domain containing 6                                                                                                                                                   |
| 0,86 | PLD1                                | phospholipase D1, phosphatidylcholine-specific                                                                                                                                         |
| 0,86 | EIF3F                               | Eukaryotic translation initiation factor 3 subunit F<br>[Source:UniProtKB/Swiss-Prot;Acc:O00303]                                                                                       |
| 0,86 | GPR19                               | G protein-coupled receptor 19                                                                                                                                                          |
| 0,86 | BCORL1                              | BCL6 corepressor-like 1                                                                                                                                                                |
| 0,86 | ZFPM2                               | zinc finger protein, FOG family member 2                                                                                                                                               |

|      |                    |                                                                                                       |
|------|--------------------|-------------------------------------------------------------------------------------------------------|
| 0,86 | OR51M1             | olfactory receptor, family 51, subfamily M, member 1                                                  |
| 0,86 | DDR2               | discoidin domain receptor tyrosine kinase 2                                                           |
| 0,86 | SMG6               | SMG6 nonsense mediated mRNA decay factor                                                              |
| 0,86 | SEMA3B;<br>MIR6872 | sema domain, immunoglobulin domain (Ig), short basic domain, secreted, (semaphorin) 3B; microRNA 6872 |
| 0,86 | ALDH4A1            | aldehyde dehydrogenase 4 family, member A1                                                            |
| 0,86 | GFER               | growth factor, augments liver regeneration                                                            |
| 0,86 | CREB3L3            | cAMP responsive element binding protein 3-like 3                                                      |
| 0,86 | ZNF383             | zinc finger protein 383                                                                               |
| 0,86 | ARHGAP31           | Rho GTPase activating protein 31                                                                      |
| 0,86 | POGZ               | Transcript Identified by AceView, Entrez Gene ID(s) 23126                                             |
| 0,86 | THADA              | Transcript Identified by AceView, Entrez Gene ID(s) 63892                                             |
| 0,86 | LILRB3             | leukocyte immunoglobulin-like receptor, subfamily B (with TM and ITIM domains), member 3              |
| 0,86 | SYT6               | synaptotagmin VI                                                                                      |
| 0,86 | ARVCF              | Zhang2013 ALT_ACCEPTOR, ALT_DONOR, coding, INTERNAL, intronic best transcript NM_001670               |
| 0,86 | ADGRL2             | adhesion G protein-coupled receptor L2                                                                |
| 0,86 | DLGAP2             | discs, large (Drosophila) homolog-associated protein 2                                                |
| 0,86 | REXO4              | REX4 homolog, 3'-5' exonuclease [Source:HGNC Symbol;Acc:HGNC:12820]                                   |
| 0,86 | SPINK6             | serine peptidase inhibitor, Kazal type 6                                                              |
| 0,86 | ZNF154             | zinc finger protein 154                                                                               |
| 0,86 | POTEA              | POTE ankyrin domain family, member A                                                                  |
| 0,86 | PRRG2              | proline rich Gla (G-carboxyglutamic acid) 2                                                           |
| 0,86 | HLA-DOA            | major histocompatibility complex, class II, DO alpha                                                  |
| 0,86 | RUSC1-AS1          | RUSC1 antisense RNA 1                                                                                 |
| 0,86 | LNK1               | ligand of numb-protein X 1, E3 ubiquitin protein ligase                                               |
| 0,86 | MAL                | mal, T-cell differentiation protein                                                                   |
| 0,86 | PPIL6              | peptidylprolyl isomerase (cyclophilin)-like 6                                                         |
| 0,86 | OR56A5             | olfactory receptor, family 56, subfamily A, member 5                                                  |
| 0,86 | DRICH1             | aspartate-rich 1                                                                                      |
| 0,86 | CYP7B1             | cytochrome P450, family 7, subfamily B, polypeptide 1                                                 |
| 0,86 | PPM1M              | protein phosphatase, Mg <sup>2+</sup> /Mn <sup>2+</sup> dependent, 1M                                 |
| 0,86 | ZNF76              | zinc finger protein 76                                                                                |
| 0,86 | CCNE2              | cyclin E2                                                                                             |
| 0,86 | DGKD               | diacylglycerol kinase, delta 130kDa                                                                   |
| 0,86 | CHRNA1             | cholinergic receptor, nicotinic beta 1                                                                |
| 0,86 | CENPF              | centromere protein F                                                                                  |
| 0,86 | NME3               | NME/NM23 nucleoside diphosphate kinase 3                                                              |
| 0,86 | THRSP              | thyroid hormone responsive                                                                            |
| 0,86 | TMCO2              | transmembrane and coiled-coil domains 2                                                               |
| 0,86 | DOC2A              | double C2-like domains, alpha                                                                         |

|      |                 |                                                                                  |
|------|-----------------|----------------------------------------------------------------------------------|
| 0,86 | INSC            | inscuteable homolog (Drosophila)                                                 |
| 0,86 | C5orf58         | chromosome 5 open reading frame 58                                               |
| 0,86 | PLCL2; MIR3714  | phospholipase C-like 2; microRNA 3714                                            |
| 0,86 | INHBE           | inhibin beta E                                                                   |
| 0,86 | INPP5D          | inositol polyphosphate-5-phosphatase D                                           |
| 0,86 | CX3CR1          | chemokine (C-X3-C motif) receptor 1                                              |
| 0,86 | SLC25A2         | solute carrier family 25 (mitochondrial carrier; ornithine transporter) member 2 |
| 0,86 | KRTAP24-1       | keratin associated protein 24-1                                                  |
| 0,86 | MKI67           | marker of proliferation Ki-67                                                    |
| 0,86 | FPR2            | formyl peptide receptor 2                                                        |
| 0,86 | VN1R2           | vomeroneural 1 receptor 2                                                        |
| 0,86 | CC2D1B          | coiled-coil and C2 domain containing 1B                                          |
| 0,86 | ZNF529          | zinc finger protein 529                                                          |
| 0,86 | MAB21L3         | mab-21-like 3 (C. elegans)                                                       |
| 0,86 | PI4KA           | phosphatidylinositol 4-kinase, catalytic, alpha                                  |
| 0,86 | MYOT            | myotilin                                                                         |
| 0,86 | FKBP6           | FK506 binding protein 6                                                          |
| 0,86 | NAP1L5          | nucleosome assembly protein 1-like 5                                             |
| 0,86 | WDFY4           | WDFY family member 4                                                             |
| 0,86 | HINT2           | histidine triad nucleotide binding protein 2                                     |
| 0,86 | MATN3           | matrilin 3                                                                       |
| 0,86 | CMKLR1          | chemerin chemokine-like receptor 1                                               |
| 0,86 | SNX10           | sorting nexin 10                                                                 |
| 0,86 | TNFRSF14        | tumor necrosis factor receptor superfamily, member 14                            |
| 0,86 | ARL5C           | ADP-ribosylation factor like GTPase 5C                                           |
| 0,86 | SERPINI1        | serpin peptidase inhibitor, clade I (neuroserpin), member 1                      |
| 0,86 | DUSP16          | dual specificity phosphatase 16                                                  |
| 0,86 | GANC            | glucosidase, alpha; neutral C                                                    |
| 0,86 | SGSH            | N-sulfoglucosamine sulfohydrolase                                                |
| 0,86 | YPEL4           | yippee like 4                                                                    |
| 0,86 | SIPA1L2         | signal-induced proliferation-associated 1 like 2                                 |
| 0,86 | TRAPPC4         | trafficking protein particle complex 4                                           |
| 0,86 | NEB             | nebulin                                                                          |
| 0,86 | WFDC8           | WAP four-disulfide core domain 8                                                 |
| 0,86 | MMD             | monocyte to macrophage differentiation-associated                                |
| 0,86 | APOD            | apolipoprotein D                                                                 |
| 0,86 | TMEM94; MIR6785 | transmembrane protein 94; microRNA 6785                                          |
| 0,86 | NOTCH2          | notch 2                                                                          |
| 0,86 | GPR37           | G protein-coupled receptor 37 (endothelin receptor type B-like)                  |
| 0,86 | FKRP            | fukutin related protein                                                          |
| 0,86 | SIRPD           | signal-regulatory protein delta                                                  |
| 0,86 | DYNLL2          | Memczak2013 ANTISENSE, coding, INTERNAL, UTR3 best transcript NM_080677          |
| 0,86 | HLA-DRA         | major histocompatibility complex, class II, DR alpha                             |
| 0,86 | PTCHD3          | patched domain containing 3                                                      |

|      |           |                                                                                                  |
|------|-----------|--------------------------------------------------------------------------------------------------|
| 0,86 | HMCN1     | hemicentin 1                                                                                     |
| 0,86 | ZIC1      | Zic family member 1                                                                              |
| 0,86 | OR2F2     | olfactory receptor, family 2, subfamily F, member 2                                              |
| 0,86 | MCEMP1    | mast cell-expressed membrane protein 1                                                           |
| 0,86 | ETV7      | ets variant 7                                                                                    |
| 0,86 | SLFN12L   | schlafen family member 12-like                                                                   |
| 0,86 | DDIT4L    | DNA-damage-inducible transcript 4-like                                                           |
| 0,86 | DYDC2     | DPY30 domain containing 2                                                                        |
| 0,86 | MICAL1    | microtubule associated monooxygenase, calponin and LIM domain containing 1                       |
| 0,86 | HLA-DMA   | major histocompatibility complex, class II, DM alpha                                             |
| 0,86 | TRPM5     | transient receptor potential cation channel, subfamily M, member 5                               |
| 0,86 | SERAC1    | serine active site containing 1                                                                  |
| 0,86 | ACVR1C    | activin A receptor type IC                                                                       |
| 0,86 | ILVBL     | ilvB (bacterial acetolactate synthase)-like                                                      |
| 0,86 | PMAIP1    | phorbol-12-myristate-13-acetate-induced protein 1                                                |
| 0,86 | SPATA18   | spermatogenesis associated 18                                                                    |
| 0,86 | ASCL2     | achaete-scute family bHLH transcription factor 2                                                 |
| 0,86 | FAM3A     | family with sequence similarity 3, member A                                                      |
| 0,86 | GTPBP3    | Memczak2013 ANTISENSE, CDS, coding, INTERNAL best transcript NM_001195422                        |
| 0,86 | C6orf99   | chromosome 6 open reading frame 99                                                               |
| 0,86 | RFX4      | Transcript Identified by AceView, Entrez Gene ID(s) 5992                                         |
| 0,86 | DYRK2     | dual specificity tyrosine-(Y)-phosphorylation regulated kinase 2                                 |
| 0,86 | MAP2      | microtubule associated protein 2                                                                 |
| 0,86 | CCDC34    | coiled-coil domain containing 34                                                                 |
| 0,86 | PLBD1     | phospholipase B domain containing 1                                                              |
| 0,86 | CDCP2     | CUB domain containing protein 2                                                                  |
| 0,86 | ZNF691    | zinc finger protein 691                                                                          |
| 0,86 | BCOR      | BCL6 corepressor                                                                                 |
| 0,86 | DUX1      | double homeobox 1                                                                                |
| 0,86 | PACRG-AS3 | PACRG antisense RNA 3                                                                            |
| 0,86 | MESP1     | mesoderm posterior bHLH transcription factor 1                                                   |
| 0,86 | KLHL2     | kelch-like family member 2                                                                       |
| 0,86 | KPTN      | kaptin (actin binding protein)                                                                   |
| 0,86 | COL4A6    | collagen, type IV, alpha 6                                                                       |
| 0,86 | ANKRD26   | ankyrin repeat domain 26                                                                         |
| 0,86 | DSP       | desmoplakin                                                                                      |
| 0,86 | STRIP1    | striatin interacting protein 1                                                                   |
| 0,86 | TPRG1     | tumor protein p63 regulated 1                                                                    |
| 0,86 | DTX3L     | deltex 3 like, E3 ubiquitin ligase                                                               |
| 0,86 | MAST2     | microtubule associated serine/threonine kinase 2                                                 |
| 0,86 | IKBKAP    | inhibitor of kappa light polypeptide gene enhancer in B-cells, kinase complex-associated protein |
| 0,86 | P4HA2     | prolyl 4-hydroxylase, alpha polypeptide II                                                       |
| 0,86 | CRIPAK    | cysteine-rich PAK1 inhibitor                                                                     |
| 0,86 | OVOL1     | ovo-like zinc finger 1                                                                           |

|      |          |                                                                                           |
|------|----------|-------------------------------------------------------------------------------------------|
| 0,86 | CACNA1C  | calcium channel, voltage-dependent, L type, alpha 1C subunit                              |
| 0,86 | QTRT1    | queuine tRNA-ribosyltransferase 1                                                         |
| 0,86 | RAB3C    | RAB3C, member RAS oncogene family                                                         |
| 0,86 | MAP1B    | microtubule associated protein 1B                                                         |
| 0,86 | TMEM150B | transmembrane protein 150B                                                                |
| 0,86 | MRC2     | mannose receptor, C type 2                                                                |
| 0,86 | TTLL7    | tubulin tyrosine ligase-like family member 7                                              |
| 0,86 | CCDC121  | coiled-coil domain containing 121                                                         |
| 0,86 | LAIR1    | leukocyte-associated immunoglobulin-like receptor 1                                       |
| 0,86 | SLC6A17  | solute carrier family 6 (neutral amino acid transporter), member 17                       |
| 0,86 | SYNPO2L  | synaptopodin 2-like                                                                       |
| 0,86 | LIPJ     | lipase, family member J                                                                   |
| 0,86 | NLGN2    | neuroligin 2                                                                              |
| 0,86 | OR9I1    | olfactory receptor, family 9, subfamily I, member 1                                       |
| 0,86 | INPP5D   | inositol polyphosphate-5-phosphatase D                                                    |
| 0,86 | SYNM     | synemin, intermediate filament protein                                                    |
| 0,86 | BRMS1L   | breast cancer metastasis-suppressor 1-like                                                |
| 0,86 | HACD4    | 3-hydroxyacyl-CoA dehydratase 4                                                           |
| 0,86 | LRP11    | LDL receptor related protein 11                                                           |
| 0,86 | SCGN     | secretagoin, EF-hand calcium binding protein                                              |
| 0,86 | HMX2     | H6 family homeobox 2                                                                      |
| 0,86 | TNKS     | tankyrase, TRF1-interacting ankyrin-related ADP-ribose polymerase                         |
| 0,86 | HMBS     | hydroxymethylbilane synthase                                                              |
| 0,86 | MCUR1    | mitochondrial calcium uniporter regulator 1                                               |
| 0,86 | TM6SF2   | transmembrane 6 superfamily member 2                                                      |
| 0,86 | BCR      | breakpoint cluster region                                                                 |
| 0,86 | ZNF106   | zinc finger protein 106                                                                   |
| 0,86 | PAFAH2   | platelet-activating factor acetylhydrolase 2                                              |
| 0,86 | OGFR     | opioid growth factor receptor                                                             |
| 0,86 | TMEM171  | transmembrane protein 171                                                                 |
| 0,86 | DNAJB13  | DnaJ (Hsp40) homolog, subfamily B, member 13                                              |
| 0,86 | SEMA6C   | sema domain, transmembrane domain (TM), and cytoplasmic domain, (semaphorin) 6C           |
| 0,86 | SETD4    | SET domain containing 4                                                                   |
| 0,85 | CST1     | cystatin SN                                                                               |
| 0,85 | CDC42BPB | CDC42 binding protein kinase beta (DMPK-like)                                             |
| 0,85 | SLC38A8  | Transcript Identified by AceView, Entrez Gene ID(s) 146167                                |
| 0,85 | KL       | klotho                                                                                    |
| 0,85 | ADAM20   | ADAM metallopeptidase domain 20                                                           |
| 0,85 | CACFD1   | calcium channel flower domain containing 1                                                |
| 0,85 | OMG      | oligodendrocyte myelin glycoprotein                                                       |
| 0,85 | SDHAF2   | Memczak2013 ALT_ACCEPTOR, ALT_DONOR, coding, INTERNAL, intronic best transcript NM_017841 |
| 0,85 | OSGEPL1  | O-sialoglycoprotein endopeptidase-like 1                                                  |
| 0,85 | ATP11B   | ATPase, class VI, type 11B                                                                |

|      |            |                                                                                   |
|------|------------|-----------------------------------------------------------------------------------|
| 0,85 | PIGF       | phosphatidylinositol glycan anchor biosynthesis class F                           |
| 0,85 | PRSS55     | protease, serine, 55                                                              |
| 0,85 | MYLK3      | myosin light chain kinase 3                                                       |
| 0,85 | ZNF414     | zinc finger protein 414                                                           |
| 0,85 | WDR7       | WD repeat domain 7                                                                |
| 0,85 | ISG15      | ISG15 ubiquitin-like modifier                                                     |
| 0,85 | TMEM88B    | transmembrane protein 88B                                                         |
| 0,85 | PCDH9      | protocadherin 9                                                                   |
| 0,85 | PTK2       | Transcript Identified by AceView, Entrez Gene ID(s)<br>5747                       |
| 0,85 | ERICH6B    | glutamate rich 6B                                                                 |
| 0,85 | GDF9       | growth differentiation factor 9                                                   |
| 0,85 | CTSH       | cathepsin H                                                                       |
| 0,85 | OR52E1     | olfactory receptor, family 52, subfamily E, member 1<br>(gene/pseudogene)         |
| 0,85 | TRAF1      | TNF receptor-associated factor 1                                                  |
| 0,85 | SRRM3      | serine/arginine repetitive matrix 3                                               |
| 0,85 | CSGALNACT2 | chondroitin sulfate N-acetylgalactosaminyltransferase 2                           |
| 0,85 | ZNF398     | zinc finger protein 398                                                           |
| 0,85 | FRZB       | frizzled-related protein                                                          |
| 0,85 | RNF24      | ring finger protein 24                                                            |
| 0,85 | EPCAM      | epithelial cell adhesion molecule                                                 |
| 0,85 | STK38L     | serine/threonine kinase 38 like                                                   |
| 0,85 | CTNND2     | catenin (cadherin-associated protein), delta 2                                    |
| 0,85 | ADAL       | adenosine deaminase-like                                                          |
| 0,85 | PTGER4     | prostaglandin E receptor 4 (subtype EP4)                                          |
| 0,85 | IMMP2L     | inner mitochondrial membrane peptidase subunit 2                                  |
| 0,85 | C9orf57    | chromosome 9 open reading frame 57                                                |
| 0,85 | NUBP2      | nucleotide binding protein 2                                                      |
| 0,85 | ZNF709     | zinc finger protein 709                                                           |
| 0,85 | LPAR5      | lysophosphatidic acid receptor 5                                                  |
| 0,85 | CDH4       | cadherin 4, type 1, R-cadherin (retinal)                                          |
| 0,85 | CCL19      | chemokine (C-C motif) ligand 19                                                   |
| 0,85 | PDE4C      | phosphodiesterase 4C, cAMP-specific                                               |
| 0,85 | PKLR       | pyruvate kinase, liver and RBC                                                    |
| 0,85 | TBC1D9B    | TBC1 domain family, member 9B (with GRAM<br>domain)                               |
| 0,85 | KIF15      | kinesin family member 15                                                          |
| 0,85 | ACKR3      | atypical chemokine receptor 3                                                     |
| 0,85 | SERP1      | stress-associated endoplasmic reticulum protein 1                                 |
| 0,85 | SLC7A2     | solute carrier family 7 (cationic amino acid transporter,<br>y+ system), member 2 |
| 0,85 | AK9        | adenylate kinase 9                                                                |
| 0,85 | RRP8       | Transcript Identified by AceView, Entrez Gene ID(s)<br>23378                      |
| 0,85 | EVA1C      | eva-1 homolog C (C. elegans)                                                      |
| 0,85 | PPP1R13B   | protein phosphatase 1, regulatory subunit 13B                                     |
| 0,85 | TCEA2      | transcription elongation factor A (SII), 2                                        |

|      |                     |                                                                                   |
|------|---------------------|-----------------------------------------------------------------------------------|
| 0,85 | NFATC2              | nuclear factor of activated T-cells, cytoplasmic, calcineurin-dependent 2         |
| 0,85 | OLFML2B             | olfactomedin like 2B                                                              |
| 0,85 | ST3GAL3;<br>MIR6079 | ST3 beta-galactoside alpha-2,3-sialyltransferase 3;<br>microRNA 6079              |
| 0,85 | ATP2A3              | Memczak2013 ANTISENSE, CDS, coding,<br>INTERNAL best transcript NM_174956         |
| 0,85 | PCOLCE              | procollagen C-endopeptidase enhancer                                              |
| 0,85 | LRCH1               | leucine-rich repeats and calponin homology (CH)<br>domain containing 1            |
| 0,85 | KCNT1               | potassium channel, sodium activated subfamily T,<br>member 1                      |
| 0,85 | GPM6B               | glycoprotein M6B                                                                  |
| 0,85 | BAG1                | BCL2-associated athanogene                                                        |
| 0,85 | SLC2A10             | solute carrier family 2 (facilitated glucose transporter),<br>member 10           |
| 0,85 | NHLH1               | nescient helix-loop-helix 1                                                       |
| 0,85 | TMEM74              | transmembrane protein 74                                                          |
| 0,85 | NEO1                | neogenin 1                                                                        |
| 0,85 | KATNAL2             | katanin p60 subunit A-like 2                                                      |
| 0,85 | KCNQ2               | potassium channel, voltage gated KQT-like subfamily<br>Q, member 2                |
| 0,85 | KRT33A              | keratin 33A, type I                                                               |
| 0,85 | ARMS2               | age-related maculopathy susceptibility 2                                          |
| 0,85 | KBTD2               | kelch repeat and BTB (POZ) domain containing 2                                    |
| 0,85 | KRTAP2-3            | keratin associated protein 2-3                                                    |
| 0,85 | LDLRAD4             | low density lipoprotein receptor class A domain<br>containing 4                   |
| 0,85 | B3GALT1             | UDP-Gal:betaGlcNAc beta 1,3-galactosyltransferase 1                               |
| 0,85 | MYH9                | myosin, heavy chain 9, non-muscle                                                 |
| 0,85 | NCBP2-AS2           | NCBP2 antisense RNA 2 (head to head)                                              |
| 0,85 | SLC6A2              | solute carrier family 6 (neurotransmitter transporter),<br>member 2               |
| 0,85 | MANF                | mesencephalic astrocyte-derived neurotrophic factor                               |
| 0,85 | ATP9B               | ATPase, class II, type 9B                                                         |
| 0,85 | CHPF2; MIR671       | chondroitin polymerizing factor 2; microRNA 671                                   |
| 0,85 | SERF2               | small EDRK-rich factor 2                                                          |
| 0,85 | TET1                | tet methylcytosine dioxygenase 1                                                  |
| 0,85 | IFNA16              | interferon, alpha 16                                                              |
| 0,85 | ADGRD1              | adhesion G protein-coupled receptor D1                                            |
| 0,85 | KDM4C               | Memczak2013 ANTISENSE, coding, INTERNAL,<br>intronic best transcript NM_001146694 |
| 0,85 | GUCY1B3             | guanylate cyclase 1, soluble, beta 3                                              |
| 0,85 | MATN2               | matrilin 2                                                                        |
| 0,85 | CHRD1               | chordin-like 1                                                                    |
| 0,85 | FOXA2               | forkhead box A2                                                                   |
| 0,85 | SMC1B               | structural maintenance of chromosomes 1B                                          |
| 0,85 | RYR3                | ryanodine receptor 3                                                              |
| 0,85 | FMO6P               | flavin containing monooxygenase 6 pseudogene                                      |

|      |                                  |                                                                                                                                                                                                   |
|------|----------------------------------|---------------------------------------------------------------------------------------------------------------------------------------------------------------------------------------------------|
| 0,85 | ABCA1                            | ATP binding cassette subfamily A member 1                                                                                                                                                         |
| 0,85 | PDPR                             | pyruvate dehydrogenase phosphatase regulatory subunit                                                                                                                                             |
| 0,85 | CACNA2D3                         | calcium channel, voltage-dependent, alpha 2/delta subunit 3                                                                                                                                       |
| 0,85 | SUGP2                            | SURP and G-patch domain containing 2                                                                                                                                                              |
| 0,85 | SLC38A9                          | Transcript Identified by AceView, Entrez Gene ID(s) 153129                                                                                                                                        |
| 0,85 | FAM63B                           | family with sequence similarity 63, member B                                                                                                                                                      |
| 0,85 | AMOTL1                           | angiomotin like 1                                                                                                                                                                                 |
| 0,85 | PHYKPL                           | 5-phosphohydroxy-L-lysine phospho-lyase                                                                                                                                                           |
| 0,85 | COL14A1                          | collagen, type XIV, alpha 1                                                                                                                                                                       |
| 0,85 | SPX                              | spexin hormone                                                                                                                                                                                    |
| 0,85 | POLM; MIR6838                    | polymerase (DNA directed), mu; microRNA 6838                                                                                                                                                      |
| 0,85 | PKD2L2                           | polycystic kidney disease 2-like 2                                                                                                                                                                |
| 0,85 | SP9                              | Sp9 transcription factor                                                                                                                                                                          |
| 0,85 | CGN                              | cingulin                                                                                                                                                                                          |
| 0,85 | ACYP2                            | acylphosphatase 2, muscle type                                                                                                                                                                    |
| 0,85 | LTBP2                            | latent transforming growth factor beta binding protein 2                                                                                                                                          |
| 0,85 | ZNF469                           | zinc finger protein 469                                                                                                                                                                           |
| 0,85 | ZNF285                           | zinc finger protein 285                                                                                                                                                                           |
| 0,85 | TMEM159                          | transmembrane protein 159                                                                                                                                                                         |
| 0,85 | CPNE5                            | copine V                                                                                                                                                                                          |
| 0,85 | ANG; RNASE4                      | angiogenin, ribonuclease, RNase A family, 5; ribonuclease, RNase A family, 4                                                                                                                      |
| 0,85 | DIRC3                            | disrupted in renal carcinoma 3                                                                                                                                                                    |
| 0,85 | FEM1C                            | Jeck2013 ALT_ACCEPTOR, ALT_DONOR, coding, INTERNAL, intronic best transcript NM_020177                                                                                                            |
| 0,85 | HNRNPCL3                         | heterogeneous nuclear ribonucleoprotein C-like 3 [Source:HGNC Symbol;Acc:HGNC:51235]                                                                                                              |
| 0,85 | CHD7                             | chromodomain helicase DNA binding protein 7                                                                                                                                                       |
| 0,85 | POTEF                            | POTE ankyrin domain family, member F                                                                                                                                                              |
| 0,85 | ZNF543                           | zinc finger protein 543                                                                                                                                                                           |
| 0,85 | NUTM2G                           | NUT family member 2G                                                                                                                                                                              |
| 0,85 | ALG6                             | ALG6, alpha-1,3-glucosyltransferase                                                                                                                                                               |
| 0,85 | BMP6                             | bone morphogenetic protein 6                                                                                                                                                                      |
| 0,85 | BORCS5                           | BLOC-1 related complex subunit 5                                                                                                                                                                  |
| 0,85 | PIDD1                            | p53-induced death domain protein 1                                                                                                                                                                |
| 0,85 | PRKCH                            | protein kinase C, eta                                                                                                                                                                             |
| 0,85 | ACACA                            | acetyl-CoA carboxylase alpha                                                                                                                                                                      |
| 0,85 | TGDS                             | TDP-glucose 4,6-dehydratase                                                                                                                                                                       |
| 0,85 | DST                              | dystonin                                                                                                                                                                                          |
| 0,85 | MYB-AS1; MYB; RP1-32B1.3; rawjer | MYB antisense RNA 1 [Source:HGNC Symbol;Acc:HGNC:37457]; Memczak2013 ANTISENSE, coding, INTERNAL, intronic best transcript NM_005375; putative novel transcript; Transcript Identified by AceView |
| 0,85 | TFPT                             | TCF3 (E2A) fusion partner (in childhood Leukemia)                                                                                                                                                 |

|      |            |                                                                                   |
|------|------------|-----------------------------------------------------------------------------------|
| 0,85 | VTI1A      | vesicle transport through interaction with t-SNAREs 1A                            |
| 0,85 | ZBTB41     | zinc finger and BTB domain containing 41                                          |
| 0,85 | IL9        | interleukin 9                                                                     |
| 0,85 | ACSL6      | acyl-CoA synthetase long-chain family member 6                                    |
| 0,85 | ATP6V0D2   | ATPase, H <sup>+</sup> transporting, lysosomal 38kDa, V0 subunit d2               |
| 0,85 | AHCYL2     | adenosylhomocysteinase-like 2                                                     |
| 0,85 | PTPRF      | protein tyrosine phosphatase, receptor type, F                                    |
| 0,85 | DHDH       | dihydrodiol dehydrogenase (dimeric)                                               |
| 0,85 | COMMD10    | COMM domain containing 10                                                         |
| 0,85 | TRIM68     | tripartite motif containing 68                                                    |
| 0,85 | RPS6KA1    | ribosomal protein S6 kinase, 90kDa, polypeptide 1                                 |
| 0,85 | FCGR1A     | Fc fragment of IgG, high affinity Ia, receptor (CD64)                             |
| 0,85 | UCP2       | uncoupling protein 2 (mitochondrial, proton carrier)                              |
| 0,85 | TRIM23     | tripartite motif containing 23                                                    |
| 0,85 | OR1B1      | olfactory receptor, family 1, subfamily B, member 1 (gene/pseudogene)             |
| 0,85 | ATP2C2     | ATPase, Ca <sup>++</sup> transporting, type 2C, member 2                          |
| 0,85 | TINF2      | TERF1 (TRF1)-interacting nuclear factor 2                                         |
| 0,85 | MORC1      | MORC family CW-type zinc finger 1                                                 |
| 0,85 | SYT11      | synaptotagmin XI                                                                  |
| 0,85 | STARD7-AS1 | STARD7 antisense RNA 1                                                            |
| 0,85 | NOX4       | NADPH oxidase 4                                                                   |
| 0,85 | RASGEF1B   | RasGEF domain family member 1B                                                    |
| 0,85 | C12orf40   | chromosome 12 open reading frame 40                                               |
| 0,85 | RNASE3     | ribonuclease, RNase A family, 3                                                   |
| 0,85 | FURIN      | furin (paired basic amino acid cleaving enzyme)                                   |
| 0,85 | C9orf72    | chromosome 9 open reading frame 72                                                |
| 0,85 | NDUFS7     | NADH dehydrogenase (ubiquinone) Fe-S protein 7, 20kDa (NADH-coenzyme Q reductase) |
| 0,85 | PTX4       | pentraxin 4, long                                                                 |
| 0,85 | ARID1A     | AT rich interactive domain 1A (SWI-like)                                          |
| 0,85 | ZNF594     | zinc finger protein 594                                                           |
| 0,85 | C1orf105   | chromosome 1 open reading frame 105                                               |
| 0,85 | MUM1L1     | melanoma associated antigen (mutated) 1-like 1                                    |
| 0,85 | ATAD5      | ATPase family, AAA domain containing 5                                            |
| 0,85 | OR2Z1      | olfactory receptor, family 2, subfamily Z, member 1                               |
| 0,85 | GOLGA6L10  | golgin A6 family-like 10                                                          |
| 0,85 | KCNMB1     | potassium channel subfamily M regulatory beta subunit 1                           |
| 0,85 | WWP1       | Transcript Identified by AceView, Entrez Gene ID(s) 11059                         |
| 0,85 | RPS6KL1    | ribosomal protein S6 kinase-like 1                                                |
| 0,85 | NEUROD4    | neuronal differentiation 4                                                        |
| 0,85 | AKAP2      | A kinase (PRKA) anchor protein 2                                                  |
| 0,85 | SAG        | S-antigen; retina and pineal gland (arrestin)                                     |
| 0,85 | TTC12      | tetratricopeptide repeat domain 12                                                |
| 0,85 | GRM1       | glutamate receptor, metabotropic 1                                                |
| 0,85 | SPATA2L    | spermatogenesis associated 2-like                                                 |

|      |                    |                                                                        |
|------|--------------------|------------------------------------------------------------------------|
| 0,85 | SLC16A1            | solute carrier family 16 (monocarboxylate transporter), member 1       |
| 0,85 | HECTD4;<br>MIR6861 | HECT domain containing E3 ubiquitin protein ligase 4;<br>microRNA 6861 |
| 0,85 | C10orf71           | chromosome 10 open reading frame 71                                    |
| 0,85 | MRAS               | muscle RAS oncogene homolog                                            |
| 0,85 | VIM-AS1            | VIM antisense RNA 1                                                    |
| 0,85 | ZNF565             | zinc finger protein 565                                                |
| 0,85 | TRPM3              | transient receptor potential cation channel, subfamily M, member 3     |
| 0,85 | PPARGC1B           | peroxisome proliferator-activated receptor gamma, coactivator 1 beta   |
| 0,85 | ESYT2              | extended synaptotagmin-like protein 2                                  |
| 0,85 | DLX3               | distal-less homeobox 3                                                 |
| 0,85 | PHIP               | pleckstrin homology domain interacting protein                         |
| 0,85 | CALCA              | calcitonin-related polypeptide alpha                                   |
| 0,85 | H2BFWT             | H2B histone family, member W, testis-specific                          |
| 0,85 | KCNH5              | potassium channel, voltage gated eag related subfamily H, member 5     |
| 0,85 | ZNF704             | zinc finger protein 704                                                |
| 0,85 | FRMD1              | FERM domain containing 1                                               |
| 0,85 | MLYCD              | malonyl-CoA decarboxylase                                              |
| 0,85 | MAN1C1             | mannosidase, alpha, class 1C, member 1                                 |
| 0,85 | POM121L12          | POM121 transmembrane nucleoporin-like 12                               |
| 0,85 | FBN1               | fibrillin 1                                                            |
| 0,85 | ST6GAL2            | ST6 beta-galactosamide alpha-2,6-sialyltransferase 2                   |
| 0,85 | MSRB2              | methionine sulfoxide reductase B2                                      |
| 0,85 | OSTCP1             | oligosaccharyltransferase complex subunit pseudogene 1                 |
| 0,85 | BUD13              | BUD13 homolog                                                          |
| 0,85 | NNMT               | nicotinamide N-methyltransferase                                       |
| 0,85 | TSPAN18            | tetraspanin 18                                                         |
| 0,85 | KRTAP26-1          | keratin associated protein 26-1                                        |
| 0,85 | ADAMTSL4-AS1       | ADAMTSL4 antisense RNA 1                                               |
| 0,85 | AIFM2              | apoptosis-inducing factor, mitochondrion-associated, 2                 |
| 0,85 | NF1                | neurofibromin 1                                                        |
| 0,85 | ENDOD1             | endonuclease domain containing 1                                       |
| 0,85 | DUSP13             | dual specificity phosphatase 13                                        |
| 0,85 | STK32C             | serine/threonine kinase 32C                                            |
| 0,85 | ISL1               | Transcript Identified by AceView, Entrez Gene ID(s) 3670               |
| 0,85 | TTC28              | tetratricopeptide repeat domain 28                                     |
| 0,85 | DIRC2              | disrupted in renal carcinoma 2                                         |
| 0,85 | HRASLS2            | HRAS-like suppressor 2                                                 |
| 0,85 | CDRT1              | CMT1A duplicated region transcript 1                                   |
| 0,85 | KLLN               | killin, p53-regulated DNA replication inhibitor                        |
| 0,85 | ZNF391             | zinc finger protein 391                                                |
| 0,85 | CHODL              | chondrolectin                                                          |

|      |                               |                                                                                          |
|------|-------------------------------|------------------------------------------------------------------------------------------|
| 0,85 | SENP5                         | Transcript Identified by AceView, Entrez Gene ID(s)<br>205564                            |
| 0,84 | GREM1                         | gremlin 1, DAN family BMP antagonist<br>[Source:HGNC Symbol;Acc:HGNC:2001]               |
| 0,84 | SLC30A10                      | solute carrier family 30, member 10                                                      |
| 0,84 | NFKBIE                        | nuclear factor of kappa light polypeptide gene enhancer<br>in B-cells inhibitor, epsilon |
| 0,84 | TRPV5                         | transient receptor potential cation channel, subfamily<br>V, member 5                    |
| 0,84 | LUZP2                         | leucine zipper protein 2                                                                 |
| 0,84 | BARD1                         | BRCA1 associated RING domain 1                                                           |
| 0,84 | FAM228B                       | family with sequence similarity 228, member B                                            |
| 0,84 | IFI6                          | interferon, alpha-inducible protein 6                                                    |
| 0,84 | OR51L1                        | olfactory receptor, family 51, subfamily L, member 1                                     |
| 0,84 | HAL                           | histidine ammonia-lyase                                                                  |
| 0,84 | SCIN                          | scinderin                                                                                |
| 0,84 | TMEM128                       | transmembrane protein 128                                                                |
| 0,84 | MYCBP2                        | MYC binding protein 2, E3 ubiquitin protein ligase                                       |
| 0,84 | FAM26F                        | family with sequence similarity 26, member F                                             |
| 0,84 | NR1H4                         | nuclear receptor subfamily 1, group H, member 4                                          |
| 0,84 | ARHGEF10                      | Rho guanine nucleotide exchange factor 10                                                |
| 0,84 | CACNG5                        | calcium channel, voltage-dependent, gamma subunit 5                                      |
| 0,84 | DGKH                          | diacylglycerol kinase, eta                                                               |
| 0,84 | MAP3K8                        | mitogen-activated protein kinase kinase kinase 8                                         |
| 0,84 | LOC100288748;<br>RP11-22C11.2 | uncharacterized LOC100288748; novel transcript,<br>antisense to ESRP1                    |
| 0,84 | MYO1E                         | Transcript Identified by AceView, Entrez Gene ID(s)<br>4643                              |
| 0,84 | CFAP221                       | cilia and flagella associated protein 221                                                |
| 0,84 | FAM149A                       | family with sequence similarity 149, member A                                            |
| 0,84 | TIRAP                         | toll-interleukin 1 receptor (TIR) domain containing<br>adaptor protein                   |
| 0,84 | BACH2                         | BTB and CNC homology 1, basic leucine zipper<br>transcription factor 2                   |
| 0,84 | LRRC39                        | leucine rich repeat containing 39                                                        |
| 0,84 | BCL2L14                       | BCL2-like 14 (apoptosis facilitator)                                                     |
| 0,84 | ADAMTS8                       | ADAM metalloproteinase with thrombospondin type 1<br>motif 8                             |
| 0,84 | RAB6B                         | RAB6B, member RAS oncogene family                                                        |
| 0,84 | AMER2                         | APC membrane recruitment protein 2                                                       |
| 0,84 | CD274                         | CD274 molecule                                                                           |
| 0,84 | SLC23A2                       | solute carrier family 23 (ascorbic acid transporter),<br>member 2                        |
| 0,84 | TFRC                          | Transcript Identified by AceView, Entrez Gene ID(s)<br>7037                              |
| 0,84 | SNX22                         | sorting nexin 22                                                                         |
| 0,84 | CYP3A4                        | cytochrome P450, family 3, subfamily A, polypeptide 4                                    |
| 0,84 | TMEM151A                      | transmembrane protein 151A                                                               |
| 0,84 | HDAC5                         | histone deacetylase 5                                                                    |

|      |                                        |                                                                                                                                                                                                                             |
|------|----------------------------------------|-----------------------------------------------------------------------------------------------------------------------------------------------------------------------------------------------------------------------------|
| 0,84 | TMEM8B                                 | transmembrane protein 8B                                                                                                                                                                                                    |
| 0,84 | TRIM22                                 | tripartite motif containing 22                                                                                                                                                                                              |
| 0,84 | RAB36                                  | RAB36, member RAS oncogene family                                                                                                                                                                                           |
| 0,84 | TNIP3                                  | TNFAIP3 interacting protein 3                                                                                                                                                                                               |
| 0,84 | GABRR3                                 | gamma-aminobutyric acid (GABA) A receptor, rho 3 (gene/pseudogene)                                                                                                                                                          |
| 0,84 | GPR143                                 | G protein-coupled receptor 143                                                                                                                                                                                              |
| 0,84 | CNTNAP1                                | contactin associated protein 1                                                                                                                                                                                              |
| 0,84 | OCRL                                   | oculocerebrorenal syndrome of Lowe                                                                                                                                                                                          |
| 0,84 | FAM216A                                | family with sequence similarity 216, member A                                                                                                                                                                               |
| 0,84 | REPIN1                                 | replication initiator 1                                                                                                                                                                                                     |
| 0,84 | PELI1                                  | pellino E3 ubiquitin protein ligase 1                                                                                                                                                                                       |
| 0,84 | GBP1                                   | guanylate binding protein 1, interferon-inducible                                                                                                                                                                           |
| 0,84 | PCSK1                                  | proprotein convertase subtilisin/kexin type 1                                                                                                                                                                               |
| 0,84 | KCTD7                                  | potassium channel tetramerization domain containing 7                                                                                                                                                                       |
| 0,84 | RAD21                                  | Transcript Identified by AceView, Entrez Gene ID(s) 5885                                                                                                                                                                    |
| 0,84 | GPX6                                   | glutathione peroxidase 6                                                                                                                                                                                                    |
| 0,84 | LGSN                                   | lengsin, lens protein with glutamine synthetase domain                                                                                                                                                                      |
| 0,84 | LRRC8E                                 | leucine rich repeat containing 8 family, member E                                                                                                                                                                           |
| 0,84 | PSTPIP2                                | proline-serine-threonine phosphatase interacting protein 2                                                                                                                                                                  |
| 0,84 | FYCO1                                  | FYVE and coiled-coil domain containing 1                                                                                                                                                                                    |
| 0,84 | CCDC15                                 | coiled-coil domain containing 15                                                                                                                                                                                            |
| 0,84 | GPR161                                 | G protein-coupled receptor 161                                                                                                                                                                                              |
| 0,84 | CEBPD                                  | CCAAT/enhancer binding protein (C/EBP), delta                                                                                                                                                                               |
| 0,84 | TTC23L                                 | tetratricopeptide repeat domain 23-like                                                                                                                                                                                     |
| 0,84 | SAP25                                  | Sin3A associated protein 25kDa                                                                                                                                                                                              |
| 0,84 | C8orf86                                | chromosome 8 open reading frame 86                                                                                                                                                                                          |
| 0,84 | TPO                                    | thyroid peroxidase                                                                                                                                                                                                          |
| 0,84 | COX4I1                                 | cytochrome c oxidase subunit IV isoform 1                                                                                                                                                                                   |
| 0,84 | WDPCP                                  | WD repeat containing planar cell polarity effector                                                                                                                                                                          |
| 0,84 | RASL11B                                | RAS-like, family 11, member B                                                                                                                                                                                               |
| 0,84 | TMEM82                                 | transmembrane protein 82                                                                                                                                                                                                    |
| 0,84 | C3orf67                                | chromosome 3 open reading frame 67                                                                                                                                                                                          |
| 0,84 | PDS5B                                  | Memczak2013 ALT_ACCEPTOR, ALT_DONOR, coding, INTERNAL, intronic best transcript NM_015032                                                                                                                                   |
| 0,84 | ZDHHC3                                 | zinc finger, DHHC-type containing 3                                                                                                                                                                                         |
| 0,84 | BACH2                                  | Memczak2013 ANTISENSE, coding, INTERNAL, intronic best transcript NM_001170794                                                                                                                                              |
| 0,84 | MRPL23;<br>LOC102724828;<br>AC004556.1 | Homo sapiens mitochondrial ribosomal protein L23 (MRPL23), mRNA.; 39S ribosomal protein L23, mitochondrial-like; Homo sapiens mitochondrial ribosomal protein L23, mRNA (cDNA clone MGC:12795 IMAGE:4298000), complete cds. |
| 0,84 | NOTCH3                                 | notch 3                                                                                                                                                                                                                     |
| 0,84 | ADPRHL2                                | ADP-ribosylhydrolase like 2                                                                                                                                                                                                 |

|      |                                                                                                                                                                                    |                                                                                                                                                                                                                                                                                                                                                                                                                          |
|------|------------------------------------------------------------------------------------------------------------------------------------------------------------------------------------|--------------------------------------------------------------------------------------------------------------------------------------------------------------------------------------------------------------------------------------------------------------------------------------------------------------------------------------------------------------------------------------------------------------------------|
| 0,84 | CSPG4                                                                                                                                                                              | chondroitin sulfate proteoglycan 4                                                                                                                                                                                                                                                                                                                                                                                       |
| 0,84 | CRABP2                                                                                                                                                                             | cellular retinoic acid binding protein 2                                                                                                                                                                                                                                                                                                                                                                                 |
| 0,84 | NEURL1B                                                                                                                                                                            | neuralized E3 ubiquitin protein ligase 1B                                                                                                                                                                                                                                                                                                                                                                                |
| 0,84 | HGD                                                                                                                                                                                | homogentisate 1,2-dioxygenase                                                                                                                                                                                                                                                                                                                                                                                            |
| 0,84 | FAHD2A                                                                                                                                                                             | fumarylacetoacetate hydrolase domain containing 2A                                                                                                                                                                                                                                                                                                                                                                       |
| 0,84 | NR2F1                                                                                                                                                                              | nuclear receptor subfamily 2, group F, member 1                                                                                                                                                                                                                                                                                                                                                                          |
| 0,84 | TGS1                                                                                                                                                                               | trimethylguanosine synthase 1                                                                                                                                                                                                                                                                                                                                                                                            |
| 0,84 | PCDHA9;<br>PCDHAC1;<br>PCDHAC2;<br>PCDHA1;<br>PCDHA10;<br>PCDHA11;<br>PCDHA12;<br>PCDHA13;<br>PCDHA2;<br>PCDHA3;<br>PCDHA4;<br>PCDHA5;<br>PCDHA6;<br>PCDHA7;<br>PCDHA8;<br>PCDHA14 | protocadherin alpha 9; protocadherin alpha subfamily C, 1; protocadherin alpha subfamily C, 2; protocadherin alpha 1; protocadherin alpha 10; protocadherin alpha 11; protocadherin alpha 12; protocadherin alpha 13; protocadherin alpha 2; protocadherin alpha 3; protocadherin alpha 4; protocadherin alpha 5; protocadherin alpha 6; protocadherin alpha 7; protocadherin alpha 8; protocadherin alpha 14 pseudogene |
| 0,84 | GRIN2A                                                                                                                                                                             | Transcript Identified by AceView, Entrez Gene ID(s) 2903                                                                                                                                                                                                                                                                                                                                                                 |
| 0,84 | AS3MT                                                                                                                                                                              | arsenite methyltransferase                                                                                                                                                                                                                                                                                                                                                                                               |
| 0,84 | EXT1; hunera                                                                                                                                                                       | Jeck2013 ALT_ACCEPTOR, ALT_DONOR, coding, INTERNAL, intronic best transcript NM_000127; Transcript Identified by AceView                                                                                                                                                                                                                                                                                                 |
| 0,84 | MLXIP                                                                                                                                                                              | Memczak2013 ALT_ACCEPTOR, ALT_DONOR, coding, INTERNAL, intronic best transcript NM_014938                                                                                                                                                                                                                                                                                                                                |
| 0,84 | ETNK2                                                                                                                                                                              | ethanolamine kinase 2                                                                                                                                                                                                                                                                                                                                                                                                    |
| 0,84 | MYLK2                                                                                                                                                                              | myosin light chain kinase 2                                                                                                                                                                                                                                                                                                                                                                                              |
| 0,84 | OSBP                                                                                                                                                                               | oxysterol binding protein                                                                                                                                                                                                                                                                                                                                                                                                |
| 0,84 | CRYBG3                                                                                                                                                                             | crystallin beta-gamma domain containing 3                                                                                                                                                                                                                                                                                                                                                                                |
| 0,84 | MBOAT4                                                                                                                                                                             | membrane bound O-acyltransferase domain containing 4                                                                                                                                                                                                                                                                                                                                                                     |
| 0,84 | CNGA1                                                                                                                                                                              | cyclic nucleotide gated channel alpha 1                                                                                                                                                                                                                                                                                                                                                                                  |
| 0,84 | H1FX                                                                                                                                                                               | H1 histone family, member X                                                                                                                                                                                                                                                                                                                                                                                              |
| 0,84 | DSG4                                                                                                                                                                               | desmoglein 4                                                                                                                                                                                                                                                                                                                                                                                                             |
| 0,84 | HDAC10                                                                                                                                                                             | histone deacetylase 10                                                                                                                                                                                                                                                                                                                                                                                                   |
| 0,84 | GGACT                                                                                                                                                                              | gamma-glutamylamine cyclotransferase                                                                                                                                                                                                                                                                                                                                                                                     |
| 0,84 | PADI3                                                                                                                                                                              | peptidyl arginine deiminase, type III                                                                                                                                                                                                                                                                                                                                                                                    |
| 0,84 | HEATR5A                                                                                                                                                                            | HEAT repeat containing 5A                                                                                                                                                                                                                                                                                                                                                                                                |
| 0,84 | HDAC11                                                                                                                                                                             | histone deacetylase 11                                                                                                                                                                                                                                                                                                                                                                                                   |
| 0,84 | DNAJC12                                                                                                                                                                            | DnaJ (Hsp40) homolog, subfamily C, member 12                                                                                                                                                                                                                                                                                                                                                                             |
| 0,84 | SERPINB4                                                                                                                                                                           | serpin peptidase inhibitor, clade B (ovalbumin), member 4                                                                                                                                                                                                                                                                                                                                                                |
| 0,84 | ZNF711                                                                                                                                                                             | zinc finger protein 711                                                                                                                                                                                                                                                                                                                                                                                                  |
| 0,84 | KIFC2                                                                                                                                                                              | kinesin family member C2                                                                                                                                                                                                                                                                                                                                                                                                 |

|      |            |                                                                                                               |
|------|------------|---------------------------------------------------------------------------------------------------------------|
| 0,84 | SNX30      | sorting nexin family member 30                                                                                |
| 0,84 | CD14       | CD14 molecule                                                                                                 |
| 0,84 | NMRK1      | nicotinamide riboside kinase 1                                                                                |
| 0,84 | CD300A     | CD300a molecule                                                                                               |
| 0,84 | SNX5       | Zhang2013 ALT_ACCEPTOR, ALT_DONOR, coding, INTERNAL, intronic best transcript NM_152227                       |
| 0,84 | ZNF627     | Memczak2013 ANTISENSE, CDS, coding, INTERNAL best transcript NM_145295                                        |
| 0,84 | BRINP1     | bone morphogenetic protein/retinoic acid inducible neural-specific 1                                          |
| 0,84 | PPP1R21    | protein phosphatase 1, regulatory subunit 21                                                                  |
| 0,84 | FLNA       | Jeck2013 ANTISENSE, CDS, coding, INTERNAL, OVCODE, OVEXON best transcript NM_001110556                        |
| 0,84 | FAM166A    | family with sequence similarity 166, member A                                                                 |
| 0,84 | OR4C16     | olfactory receptor, family 4, subfamily C, member 16 (gene/pseudogene)                                        |
| 0,84 | CFLAR      | CASP8 and FADD like apoptosis regulator                                                                       |
| 0,84 | MTL5       | metallothionein-like 5, testis-specific (tesmin)                                                              |
| 0,84 | RAPGEFL1   | Rap guanine nucleotide exchange factor like 1                                                                 |
| 0,84 | SUCLG2     | succinate-CoA ligase, GDP-forming, beta subunit                                                               |
| 0,84 | PSMB9      | proteasome subunit beta 9                                                                                     |
| 0,84 | SLC35E4    | solute carrier family 35, member E4                                                                           |
| 0,84 | GALE       | UDP-galactose-4-epimerase                                                                                     |
| 0,84 | ABCC11     | ATP binding cassette subfamily C member 11                                                                    |
| 0,84 | FAM229A    | family with sequence similarity 229, member A                                                                 |
| 0,84 | ATP8B1     | ATPase, aminophospholipid transporter, class I, type 8B, member 1                                             |
| 0,84 | TMEM51     | transmembrane protein 51                                                                                      |
| 0,84 | WDR64      | WD repeat domain 64                                                                                           |
| 0,84 | PPP1R9B    | protein phosphatase 1, regulatory subunit 9B                                                                  |
| 0,84 | PTPRB      | protein tyrosine phosphatase, receptor type, B                                                                |
| 0,84 | TESC       | tescalcin                                                                                                     |
| 0,84 | MTRNR2L10  | MT-RNR2-like 10                                                                                               |
| 0,84 | TSPEAR     | thrombospondin-type laminin G domain and EAR repeats                                                          |
| 0,84 | PFKFB2     | 6-phosphofructo-2-kinase/fructose-2,6-biphosphatase 2                                                         |
| 0,84 | ZNF841     | zinc finger protein 841                                                                                       |
| 0,84 | MINK1      | misshapen-like kinase 1                                                                                       |
| 0,84 | OR14C36    | olfactory receptor, family 14, subfamily C, member 36                                                         |
| 0,84 | ZNF546     | zinc finger protein 546                                                                                       |
| 0,84 | CDY1       | chromodomain protein, Y-linked, 1                                                                             |
| 0,84 | MVB12B     | multivesicular body subunit 12B                                                                               |
| 0,84 | OR6J1      | olfactory receptor, family 6, subfamily J, member 1 (gene/pseudogene)                                         |
| 0,84 | ST6GALNAC2 | ST6 (alpha-N-acetyl-neuraminy1-2,3-beta-galactosyl-1,3)-N-acetylgalactosaminide alpha-2,6-sialyltransferase 2 |
| 0,84 | C1orf68    | chromosome 1 open reading frame 68                                                                            |

|      |                               |                                                                                                                                                                                                                                                                                                                                                                                                                      |
|------|-------------------------------|----------------------------------------------------------------------------------------------------------------------------------------------------------------------------------------------------------------------------------------------------------------------------------------------------------------------------------------------------------------------------------------------------------------------|
| 0,84 | ACYP1                         | acylphosphatase 1, erythrocyte (common) type                                                                                                                                                                                                                                                                                                                                                                         |
| 0,84 | POGZ                          | Transcript Identified by AceView, Entrez Gene ID(s) 23126                                                                                                                                                                                                                                                                                                                                                            |
| 0,84 | TMEM184A                      | transmembrane protein 184A                                                                                                                                                                                                                                                                                                                                                                                           |
| 0,84 | C15orf59                      | chromosome 15 open reading frame 59                                                                                                                                                                                                                                                                                                                                                                                  |
| 0,84 | SOWAHB                        | so sondowah ankyrin repeat domain family member B                                                                                                                                                                                                                                                                                                                                                                    |
| 0,84 | SPRR3                         | small proline-rich protein 3                                                                                                                                                                                                                                                                                                                                                                                         |
| 0,84 | EBLN2                         | endogenous Bornavirus-like nucleoprotein 2                                                                                                                                                                                                                                                                                                                                                                           |
| 0,84 | ZNF707                        | zinc finger protein 707                                                                                                                                                                                                                                                                                                                                                                                              |
| 0,84 | ACSS3                         | acyl-CoA synthetase short-chain family member 3                                                                                                                                                                                                                                                                                                                                                                      |
| 0,84 | SUN3                          | Sad1 and UNC84 domain containing 3                                                                                                                                                                                                                                                                                                                                                                                   |
| 0,84 | RPS6KA1                       | ribosomal protein S6 kinase, 90kDa, polypeptide 1                                                                                                                                                                                                                                                                                                                                                                    |
| 0,84 | LOC100133315;<br>RP11-849H4.2 | transient receptor potential cation channel, subfamily C, member 2-like; Salzman2013 ANNOTATED, INTERNAL, ncRNA, OVEXON best transcript NR_029192; Transcript Identified by AceView, Entrez Gene ID(s) 100133315, RefSeq ID(s) NR_029192; Transcript Identified by AceView, Entrez Gene ID(s) 100133315; Putative short transient receptor potential channel 2-like protein [Source:UniProtKB/Swiss-Prot;Acc:Q6ZNB5] |
| 0,84 | P3H3                          | prolyl 3-hydroxylase 3                                                                                                                                                                                                                                                                                                                                                                                               |
| 0,84 | LRFN3                         | leucine rich repeat and fibronectin type III domain containing 3                                                                                                                                                                                                                                                                                                                                                     |
| 0,84 | AGRN                          | agrin                                                                                                                                                                                                                                                                                                                                                                                                                |
| 0,84 | ELMSAN1                       | ELM2 and Myb/SANT-like domain containing 1                                                                                                                                                                                                                                                                                                                                                                           |
| 0,84 | GJC2                          | gap junction protein gamma 2                                                                                                                                                                                                                                                                                                                                                                                         |
| 0,84 | SCGB2A2                       | secretoglobin, family 2A, member 2                                                                                                                                                                                                                                                                                                                                                                                   |
| 0,84 | ARHGEF15                      | Rho guanine nucleotide exchange factor 15                                                                                                                                                                                                                                                                                                                                                                            |
| 0,84 | NOS3                          | nitric oxide synthase 3 (endothelial cell)                                                                                                                                                                                                                                                                                                                                                                           |
| 0,84 | LRBA                          | LPS-responsive vesicle trafficking, beach and anchor containing                                                                                                                                                                                                                                                                                                                                                      |
| 0,84 | MMD2                          | monocyte to macrophage differentiation-associated 2                                                                                                                                                                                                                                                                                                                                                                  |
| 0,84 | DNMT3B                        | DNA (cytosine-5-)-methyltransferase 3 beta                                                                                                                                                                                                                                                                                                                                                                           |
| 0,84 | CHGA                          | chromogranin A                                                                                                                                                                                                                                                                                                                                                                                                       |
| 0,84 | LRRC30                        | leucine rich repeat containing 30                                                                                                                                                                                                                                                                                                                                                                                    |
| 0,84 | CDC34                         | cell division cycle 34                                                                                                                                                                                                                                                                                                                                                                                               |
| 0,84 | MAN2A2                        | mannosidase, alpha, class 2A, member 2                                                                                                                                                                                                                                                                                                                                                                               |
| 0,84 | SERPINC1                      | serpin peptidase inhibitor, clade C (antithrombin), member 1                                                                                                                                                                                                                                                                                                                                                         |
| 0,84 | C1R                           | complement component 1, r subcomponent                                                                                                                                                                                                                                                                                                                                                                               |
| 0,84 | LINC00525                     | long intergenic non-protein coding RNA 525                                                                                                                                                                                                                                                                                                                                                                           |
| 0,84 | MS4A6E                        | membrane-spanning 4-domains, subfamily A, member 6E                                                                                                                                                                                                                                                                                                                                                                  |
| 0,84 | TRAPPC4                       | trafficking protein particle complex 4                                                                                                                                                                                                                                                                                                                                                                               |
| 0,84 | MAGI1                         | membrane associated guanylate kinase, WW and PDZ domain containing 1                                                                                                                                                                                                                                                                                                                                                 |
| 0,84 | DGKD                          | diacylglycerol kinase, delta 130kDa                                                                                                                                                                                                                                                                                                                                                                                  |
| 0,83 | KIAA1683                      | KIAA1683                                                                                                                                                                                                                                                                                                                                                                                                             |
| 0,83 | TRIO                          | trio Rho guanine nucleotide exchange factor                                                                                                                                                                                                                                                                                                                                                                          |
| 0,83 | TMEM63B                       | transmembrane protein 63B                                                                                                                                                                                                                                                                                                                                                                                            |

|      |         |                                                                         |
|------|---------|-------------------------------------------------------------------------|
| 0,83 | HFE2    | hemochromatosis type 2 (juvenile)                                       |
| 0,83 | XCL2    | chemokine (C motif) ligand 2                                            |
| 0,83 | PRR25   | proline rich 25                                                         |
| 0,83 | FSHB    | follicle stimulating hormone, beta polypeptide                          |
| 0,83 | NTHL1   | nth-like DNA glycosylase 1                                              |
| 0,83 | WFDC1   | WAP four-disulfide core domain 1                                        |
| 0,83 | GMPR    | guanosine monophosphate reductase                                       |
| 0,83 | GXYLT1  | glucoside xylosyltransferase 1                                          |
| 0,83 | C2orf80 | chromosome 2 open reading frame 80                                      |
| 0,83 | MUSTN1  | musculoskeletal, embryonic nuclear protein 1                            |
| 0,83 | HYOU1   | hypoxia up-regulated 1                                                  |
| 0,83 | EXPH5   | exophilin 5                                                             |
| 0,83 | TEX264  | testis expressed 264                                                    |
| 0,83 | ITGA10  | integrin alpha 10                                                       |
| 0,83 | FRRS1   | ferric-chelate reductase 1                                              |
| 0,83 | KDM8    | lysine (K)-specific demethylase 8                                       |
| 0,83 | TPPP3   | tubulin polymerization-promoting protein family member 3                |
| 0,83 | FBN2    | fibrillin 2                                                             |
| 0,83 | RPL39L  | ribosomal protein L39-like                                              |
| 0,83 | OR11H7  | olfactory receptor, family 11, subfamily H, member 7 (gene/pseudogene)  |
| 0,83 | ZSWIM2  | zinc finger, SWIM-type containing 2                                     |
| 0,83 | LCAT    | lecithin-cholesterol acyltransferase                                    |
| 0,83 | NPR1    | natriuretic peptide receptor 1                                          |
| 0,83 | VSTM2B  | V-set and transmembrane domain containing 2B                            |
| 0,83 | AP2A1   | adaptor-related protein complex 2, alpha 1 subunit                      |
| 0,83 | LRRTM3  | leucine rich repeat transmembrane neuronal 3                            |
| 0,83 | BCAM    | basal cell adhesion molecule (Lutheran blood group)                     |
| 0,83 | SYT17   | synaptotagmin XVII                                                      |
| 0,83 | ZBTB12  | zinc finger and BTB domain containing 12                                |
| 0,83 | MAST4   | microtubule associated serine/threonine kinase family member 4          |
| 0,83 | STS     | steroid sulfatase (microsomal), isozyme S                               |
| 0,83 | CCDC130 | coiled-coil domain containing 130                                       |
| 0,83 | NATD1   | N-acetyltransferase domain containing 1                                 |
| 0,83 | GSTZ1   | glutathione S-transferase zeta 1                                        |
| 0,83 | IFT172  | intraflagellar transport 172                                            |
| 0,83 | TSPAN11 | tetraspanin 11                                                          |
| 0,83 | GPHA2   | glycoprotein hormone alpha 2                                            |
| 0,83 | MID2    | midline 2                                                               |
| 0,83 | VPS8    | Transcript Identified by AceView, Entrez Gene ID(s) 23355               |
| 0,83 | SHROOM1 | shroom family member 1                                                  |
| 0,83 | EML1    | echinoderm microtubule associated protein like 1                        |
| 0,83 | KDM3A   | lysine (K)-specific demethylase 3A                                      |
| 0,83 | KLK12   | kallikrein related peptidase 12                                         |
| 0,83 | CA9     | carbonic anhydrase IX                                                   |
| 0,83 | BRF2    | BRF2, RNA polymerase III transcription initiation factor 50 kDa subunit |

|      |          |                                                                |
|------|----------|----------------------------------------------------------------|
| 0,83 | SNAP25   | synaptosome associated protein 25kDa                           |
| 0,83 | PRSS22   | protease, serine, 22                                           |
| 0,83 | SSTR3    | somatostatin receptor 3                                        |
| 0,83 | C10orf11 | chromosome 10 open reading frame 11                            |
| 0,83 | DNAJB8   | DnaJ (Hsp40) homolog, subfamily B, member 8                    |
| 0,83 | HIVEP2   | human immunodeficiency virus type I enhancer binding protein 2 |
| 0,83 | SNX20    | sorting nexin 20                                               |
| 0,83 | FAM120B  | family with sequence similarity 120B                           |
| 0,83 | GABRA1   | gamma-aminobutyric acid (GABA) A receptor, alpha 1             |
| 0,83 | C19orf68 | chromosome 19 open reading frame 68                            |
| 0,83 | LYG1     | lysozyme G-like 1                                              |
| 0,83 | CPN2     | carboxypeptidase N, polypeptide 2                              |
| 0,83 | ZNF517   | zinc finger protein 517                                        |
| 0,83 | ASCC1    | Transcript Identified by AceView, Entrez Gene ID(s) 51008      |
| 0,83 | DOPEY1   | dopey family member 1                                          |
| 0,83 | TTBK2    | tau tubulin kinase 2                                           |
| 0,83 | RAMP3    | receptor (G protein-coupled) activity modifying protein 3      |
| 0,83 | ARHGAP39 | Rho GTPase activating protein 39                               |
| 0,83 | PLXNB3   | plexin B3                                                      |
| 0,83 | UBE3B    | Transcript Identified by AceView, Entrez Gene ID(s) 89910      |
| 0,83 | OBFC1    | oligonucleotide/oligosaccharide-binding fold containing 1      |
| 0,83 | GPR162   | G protein-coupled receptor 162                                 |
| 0,83 | LBH      | limb bud and heart development                                 |
| 0,83 | CYP17A1  | cytochrome P450, family 17, subfamily A, polypeptide 1         |
| 0,83 | ALDOC    | aldolase C, fructose-bisphosphate                              |
| 0,83 | FABP1    | fatty acid binding protein 1, liver                            |
| 0,83 | TRAPPC10 | trafficking protein particle complex 10                        |
| 0,83 | IMMP1L   | inner mitochondrial membrane peptidase subunit 1               |
| 0,83 | LRRC55   | leucine rich repeat containing 55                              |
| 0,83 | CBR3     | carbonyl reductase 3                                           |
| 0,83 | PRDM16   | PR domain containing 16                                        |
| 0,83 | SH2D4A   | SH2 domain containing 4A                                       |
| 0,83 | OR4K17   | olfactory receptor, family 4, subfamily K, member 17           |
| 0,83 | ZNF804A  | zinc finger protein 804A                                       |
| 0,83 | CNR2     | cannabinoid receptor 2                                         |
| 0,83 | CR2      | complement component (3d/Epstein Barr virus) receptor 2        |
| 0,83 | CACFD1   | calcium channel flower domain containing 1                     |
| 0,83 | MARK1    | MAP/microtubule affinity-regulating kinase 1                   |
| 0,83 | KCNU1    | potassium channel, subfamily U, member 1                       |
| 0,83 | EFHB     | EF-hand domain family, member B                                |
| 0,83 | SLC25A30 | solute carrier family 25, member 30                            |
| 0,83 | DCAF4L2  | DDB1 and CUL4 associated factor 4-like 2                       |

|      |                     |                                                                                                                                |
|------|---------------------|--------------------------------------------------------------------------------------------------------------------------------|
| 0,83 | PLPPR4              | phospholipid phosphatase related 4                                                                                             |
| 0,83 | PRSS16              | protease, serine, 16 (thymus)                                                                                                  |
| 0,83 | SDCBP2              | syndecan binding protein (syntenin) 2                                                                                          |
| 0,83 | ZSCAN31             | zinc finger and SCAN domain containing 31                                                                                      |
| 0,83 | OR2A7;<br>ARHGEF34P | olfactory receptor, family 2, subfamily A, member 7;<br>Rho guanine nucleotide exchange factor 34,<br>pseudogene               |
| 0,83 | IFNK                | interferon, kappa                                                                                                              |
| 0,83 | TSSK3               | testis-specific serine kinase 3                                                                                                |
| 0,83 | TBR1                | T-box, brain, 1                                                                                                                |
| 0,83 | WBSCR27             | Williams Beuren syndrome chromosome region 27                                                                                  |
| 0,83 | MRPL54              | mitochondrial ribosomal protein L54                                                                                            |
| 0,83 | HSP90B1             | Transcript Identified by AceView, Entrez Gene ID(s)<br>7184                                                                    |
| 0,83 | BAIAP2L2            | BAI1-associated protein 2-like 2                                                                                               |
| 0,83 | OFD1                | oral-facial-digital syndrome 1                                                                                                 |
| 0,83 | PAPLN               | papilin, proteoglycan-like sulfated glycoprotein                                                                               |
| 0,83 | LRP6                | LDL receptor related protein 6                                                                                                 |
| 0,83 | ST14                | suppression of tumorigenicity 14 (colon carcinoma)                                                                             |
| 0,83 | COL2A1              | collagen, type II, alpha 1                                                                                                     |
| 0,83 | TOR4A               | torsin family 4, member A                                                                                                      |
| 0,83 | CD44                | Memczak2013 ALT_ACCEPTOR, ALT_DONOR,<br>coding, INTERNAL, intronic best transcript<br>NM_001202557                             |
| 0,83 | PREX2               | phosphatidylinositol-3,4,5-trisphosphate-dependent<br>Rac exchange factor 2                                                    |
| 0,83 | MUC6                | mucin 6, oligomeric mucus/gel-forming                                                                                          |
| 0,83 | ESYT3               | extended synaptotagmin-like protein 3                                                                                          |
| 0,83 | SH2D3C              | SH2 domain containing 3C                                                                                                       |
| 0,83 | SPAG11B             | sperm associated antigen 11B                                                                                                   |
| 0,83 | MAN2B1              | mannosidase, alpha, class 2B, member 1                                                                                         |
| 0,83 | C16orf96            | chromosome 16 open reading frame 96                                                                                            |
| 0,83 | ZNF605              | zinc finger protein 605                                                                                                        |
| 0,83 | ECEL1               | endothelin converting enzyme-like 1                                                                                            |
| 0,83 | MYH1                | myosin, heavy chain 1, skeletal muscle, adult                                                                                  |
| 0,83 | KCTD12              | potassium channel tetramerization domain containing<br>12                                                                      |
| 0,83 | ZZZ3                | Transcript Identified by AceView, Entrez Gene ID(s)<br>26009                                                                   |
| 0,83 | PARD3B              | par-3 family cell polarity regulator beta                                                                                      |
| 0,83 | KCNIP3              | Kv channel interacting protein 3, calsenilin                                                                                   |
| 0,83 | IL37                | interleukin 37                                                                                                                 |
| 0,83 | HMGXB3              | HMG box domain containing 3                                                                                                    |
| 0,83 | FAR2P1              | fatty acyl-CoA reductase 2 pseudogene 1                                                                                        |
| 0,83 | ZNF275              | zinc finger protein 275                                                                                                        |
| 0,83 | ADAM2               | ADAM metallopeptidase domain 2                                                                                                 |
| 0,83 | ATM                 | ATM serine/threonine kinase                                                                                                    |
| 0,83 | EXT1; spawla        | Jeck2013 ALT_ACCEPTOR, ALT_DONOR, coding,<br>INTERNAL, intronic best transcript NM_000127;<br>Transcript Identified by AceView |

|      |                                |                                                                                                                                                                                                                                                                                                      |
|------|--------------------------------|------------------------------------------------------------------------------------------------------------------------------------------------------------------------------------------------------------------------------------------------------------------------------------------------------|
| 0,83 | PLD1                           | phospholipase D1, phosphatidylcholine-specific                                                                                                                                                                                                                                                       |
| 0,83 | DRD1                           | dopamine receptor D1                                                                                                                                                                                                                                                                                 |
| 0,83 | ZNF324                         | zinc finger protein 324                                                                                                                                                                                                                                                                              |
| 0,83 | GFY                            | golgi-associated, olfactory signaling regulator                                                                                                                                                                                                                                                      |
| 0,83 | HMBS                           | hydroxymethylbilane synthase                                                                                                                                                                                                                                                                         |
| 0,83 | ITPR1                          | inositol 1,4,5-trisphosphate receptor, type 1                                                                                                                                                                                                                                                        |
| 0,83 | CYP2U1                         | cytochrome P450, family 2, subfamily U, polypeptide 1                                                                                                                                                                                                                                                |
| 0,83 | LGI4                           | leucine-rich repeat LGI family, member 4                                                                                                                                                                                                                                                             |
| 0,83 | TRIM39                         | tripartite motif containing 39                                                                                                                                                                                                                                                                       |
| 0,83 | MTMR7                          | myotubularin related protein 7                                                                                                                                                                                                                                                                       |
| 0,83 | RDH16                          | retinol dehydrogenase 16 (all-trans)                                                                                                                                                                                                                                                                 |
| 0,83 | FBXO8                          | F-box protein 8                                                                                                                                                                                                                                                                                      |
| 0,83 | LCOR                           | ligand dependent nuclear receptor corepressor                                                                                                                                                                                                                                                        |
| 0,83 | LRP1B                          | LDL receptor related protein 1B                                                                                                                                                                                                                                                                      |
| 0,83 | SLC35F4                        | solute carrier family 35, member F4                                                                                                                                                                                                                                                                  |
| 0,83 | PSD3                           | pleckstrin and Sec7 domain containing 3                                                                                                                                                                                                                                                              |
| 0,83 | CHST6                          | carbohydrate (N-acetylglucosamine 6-O) sulfotransferase 6                                                                                                                                                                                                                                            |
| 0,83 | EPB42                          | erythrocyte membrane protein band 4.2                                                                                                                                                                                                                                                                |
| 0,83 | SLC7A10                        | solute carrier family 7 (neutral amino acid transporter light chain, asc system), member 10                                                                                                                                                                                                          |
| 0,83 | MIR7162;<br>GOLGA2P6;<br>MTPAP | microRNA 7162; golgin A2 pseudogene 6; mitochondrial poly(A) polymerase                                                                                                                                                                                                                              |
| 0,83 | CYP26B1                        | cytochrome P450, family 26, subfamily B, polypeptide 1                                                                                                                                                                                                                                               |
| 0,83 | CACNG4                         | calcium channel, voltage-dependent, gamma subunit 4                                                                                                                                                                                                                                                  |
| 0,83 | CACNA1E                        | calcium channel, voltage-dependent, R type, alpha 1E subunit                                                                                                                                                                                                                                         |
| 0,83 | SYNPR                          | synaptoporin                                                                                                                                                                                                                                                                                         |
| 0,83 | IGFBP5                         | insulin like growth factor binding protein 5                                                                                                                                                                                                                                                         |
| 0,83 | DRD4                           | dopamine receptor D4                                                                                                                                                                                                                                                                                 |
| 0,83 | GLI2                           | Jeck2013 ALT_ACCEPTOR, ALT_DONOR, coding, INTERNAL, intronic best transcript NM_005270                                                                                                                                                                                                               |
| 0,83 | PIEZO2                         | piezo-type mechanosensitive ion channel component 2                                                                                                                                                                                                                                                  |
| 0,83 | IZUMO4                         | IZUMO family member 4                                                                                                                                                                                                                                                                                |
| 0,83 | PTK7                           | protein tyrosine kinase 7 (inactive)                                                                                                                                                                                                                                                                 |
| 0,83 | TXNRD3                         | thioredoxin reductase 3                                                                                                                                                                                                                                                                              |
| 0,83 | TM4SF4                         | transmembrane 4 L six family member 4                                                                                                                                                                                                                                                                |
| 0,83 | C10orf131                      | chromosome 10 open reading frame 131                                                                                                                                                                                                                                                                 |
| 0,83 | PHF24                          | PHD finger protein 24                                                                                                                                                                                                                                                                                |
| 0,83 | CYFIP2                         | cytoplasmic FMR1 interacting protein 2                                                                                                                                                                                                                                                               |
| 0,83 | C9orf147; HSDL2                | Transcript Identified by AceView, Entrez Gene ID(s) 100133204; Salzman2013 ANTISENSE, CDS, coding, downstream_end, intronic, OVCODE, OVERLAPTX, OVEXON, UTR3 best transcript NM_032303; chromosome 9 open reading frame 147; chromosome 9 open reading frame 147 [Source:HGNC Symbol;Acc:HGNC:31438] |

|      |          |                                                                         |
|------|----------|-------------------------------------------------------------------------|
| 0,83 | SLC22A9  | solute carrier family 22 (organic anion transporter), member 9          |
| 0,83 | PLEKHA5  | pleckstrin homology domain containing, family A member 5                |
| 0,83 | PRB1     | proline-rich protein BstNI subfamily 1                                  |
| 0,83 | AGA      | aspartylglucosaminidase                                                 |
| 0,83 | FAM215A  | family with sequence similarity 215, member A (non-protein coding)      |
| 0,83 | KCNG3    | potassium channel, voltage gated modifier subfamily G, member 3         |
| 0,83 | RTN1     | reticulon 1                                                             |
| 0,83 | QRICH1   | Transcript Identified by AceView, Entrez Gene ID(s) 54870               |
| 0,83 | ITPKA    | inositol-trisphosphate 3-kinase A                                       |
| 0,83 | IPP      | intracisternal A particle-promoted polypeptide                          |
| 0,82 | OR5M1    | olfactory receptor, family 5, subfamily M, member 1                     |
| 0,82 | CPS1     | carbamoyl-phosphate synthase 1                                          |
| 0,82 | PADI4    | peptidyl arginine deiminase, type IV                                    |
| 0,82 | DENND4C  | DENN/MADD domain containing 4C                                          |
| 0,82 | PRAMEF19 | PRAME family member 19<br>[Source:EntrezGene;Acc:645414]                |
| 0,82 | PKP2     | plakophilin 2                                                           |
| 0,82 | DOT1L    | DOT1-like histone H3K79 methyltransferase                               |
| 0,82 | HCN2     | hyperpolarization activated cyclic nucleotide gated potassium channel 2 |
| 0,82 | CYB561D2 | cytochrome b561 family, member D2                                       |
| 0,82 | MYBPC2   | myosin binding protein C, fast type                                     |
| 0,82 | NDUFA10  | NADH dehydrogenase (ubiquinone) 1 alpha subcomplex, 10, 42kDa           |
| 0,82 | EFCAB9   | EF-hand calcium binding domain 9                                        |
| 0,82 | BMP10    | bone morphogenetic protein 10                                           |
| 0,82 | PDE3B    | phosphodiesterase 3B, cGMP-inhibited                                    |
| 0,82 | TMEM200C | transmembrane protein 200C                                              |
| 0,82 | POLR2A   | polymerase (RNA) II (DNA directed) polypeptide A, 220kDa                |
| 0,82 | LRCOL1   | leucine rich colipase-like 1                                            |
| 0,82 | AKAP11   | A kinase (PRKA) anchor protein 11                                       |
| 0,82 | ZNF682   | zinc finger protein 682                                                 |
| 0,82 | ZDHHC19  | zinc finger, DHHC-type containing 19                                    |
| 0,82 | PALMD    | palmdelphin                                                             |
| 0,82 | PROM1    | prominin 1                                                              |
| 0,82 | ADRA2A   | adrenoceptor alpha 2A                                                   |
| 0,82 | SAG      | S-antigen; retina and pineal gland (arrestin)                           |
| 0,82 | ZCCHC11  | zinc finger, CCHC domain containing 11                                  |
| 0,82 | EPPK1    | epiplakin 1                                                             |
| 0,82 | PNPLA7   | Transcript Identified by AceView, Entrez Gene ID(s) 375775              |
| 0,82 | RGS17    | regulator of G-protein signaling 17                                     |
| 0,82 | MOXD1    | monooxygenase, DBH-like 1                                               |
| 0,82 | MMP11    | matrix metalloproteinase 11                                             |

|      |          |                                                                                               |
|------|----------|-----------------------------------------------------------------------------------------------|
| 0,82 | ADAM23   | ADAM metallopeptidase domain 23                                                               |
| 0,82 | GINS1    | GINS complex subunit 1 (Psf1 homolog)                                                         |
| 0,82 | NUP88    | nucleoporin 88kDa                                                                             |
| 0,82 | MGC27345 | uncharacterized protein MGC27345                                                              |
| 0,82 | OR4F15   | olfactory receptor, family 4, subfamily F, member 15                                          |
| 0,82 | GCC2     | Jeck2013 ANTISENSE, CDS, coding, INTERNAL, intronic, OVCODE, OVEXON best transcript NM_181453 |
| 0,82 | BDP1     | B double prime 1, subunit of RNA polymerase III transcription initiation factor IIIB          |
| 0,82 | KAT6B    | K(lysine) acetyltransferase 6B                                                                |
| 0,82 | CETN3    | centrin 3                                                                                     |
| 0,82 | NTF4     | neurotrophin 4                                                                                |
| 0,82 | ZCCHC24  | zinc finger, CCHC domain containing 24                                                        |
| 0,82 | DCAF10   | DDB1 and CUL4 associated factor 10                                                            |
| 0,82 | LGALS16  | lectin, galactoside-binding, soluble, 16                                                      |
| 0,82 | OR52A1   | olfactory receptor, family 52, subfamily A, member 1                                          |
| 0,82 | ZNF446   | zinc finger protein 446                                                                       |
| 0,82 | ZNF846   | zinc finger protein 846                                                                       |
| 0,82 | CCDC157  | coiled-coil domain containing 157                                                             |
| 0,82 | SLC22A6  | solute carrier family 22 (organic anion transporter), member 6                                |
| 0,82 | KIF16B   | kinesin family member 16B                                                                     |
| 0,82 | FES      | FES proto-oncogene, tyrosine kinase                                                           |
| 0,82 | GOLGB1   | golgin B1                                                                                     |
| 0,82 | OR5AR1   | olfactory receptor, family 5, subfamily AR, member 1 (gene/pseudogene)                        |
| 0,82 | OOSP2    | oocyte secreted protein 2                                                                     |
| 0,82 | PCNT     | pericentrin                                                                                   |
| 0,82 | SGSM3    | small G protein signaling modulator 3                                                         |
| 0,82 | CDKL5    | cyclin-dependent kinase-like 5                                                                |
| 0,82 | TRRAP    | transformation/transcription domain-associated protein                                        |
| 0,82 | ANKRD52  | ankyrin repeat domain 52                                                                      |
| 0,82 | MSC      | musculin                                                                                      |
| 0,82 | TCF20    | transcription factor 20 (AR1)                                                                 |
| 0,82 | SLCO1C1  | solute carrier organic anion transporter family, member 1C1                                   |
| 0,82 | FAM151B  | Memczak2013 ANTISENSE, coding, INTERNAL, intronic best transcript NM_205548                   |
| 0,82 | RFTN2    | raftlin family member 2                                                                       |
| 0,82 | PKIB     | protein kinase (cAMP-dependent, catalytic) inhibitor beta                                     |
| 0,82 | FAHD2B   | fumarylacetoacetate hydrolase domain containing 2B                                            |
| 0,82 | CHGB     | chromogranin B                                                                                |
| 0,82 | C4orf22  | chromosome 4 open reading frame 22                                                            |
| 0,82 | SURF1    | surfeit 1                                                                                     |
| 0,82 | AKAP12   | A kinase (PRKA) anchor protein 12                                                             |
| 0,82 | ACSS2    | acyl-CoA synthetase short-chain family member 2                                               |

|      |                                 |                                                                                               |
|------|---------------------------------|-----------------------------------------------------------------------------------------------|
| 0,82 | PREX1                           | phosphatidylinositol-3,4,5-trisphosphate-dependent Rac exchange factor 1                      |
| 0,82 | IFNA1                           | interferon, alpha 1                                                                           |
| 0,82 | DKK1                            | Jeck2013 ANTISENSE, CDS, coding, INTERNAL, intronic, OVCODE, OVEXON best transcript NM_012242 |
| 0,82 | TMEM210                         | transmembrane protein 210                                                                     |
| 0,82 | COL8A1                          | collagen, type VIII, alpha 1                                                                  |
| 0,82 | IKBKG                           | inhibitor of kappa light polypeptide gene enhancer in B-cells, kinase gamma                   |
| 0,82 | GNMT                            | glycine N-methyltransferase                                                                   |
| 0,82 | PROKR1                          | prokineticin receptor 1                                                                       |
| 0,82 | NR4A3                           | nuclear receptor subfamily 4, group A, member 3                                               |
| 0,82 | LCE6A                           | late cornified envelope 6A                                                                    |
| 0,82 | CFTR                            | cystic fibrosis transmembrane conductance regulator                                           |
| 0,82 | LARGE                           | Transcript Identified by AceView, Entrez Gene ID(s) 9215                                      |
| 0,82 | KRT77                           | keratin 77, type II                                                                           |
| 0,82 | CPED1                           | cadherin-like and PC-esterase domain containing 1                                             |
| 0,82 | GATM                            | glycine amidinotransferase (L-arginine:glycine amidinotransferase)                            |
| 0,82 | NCOR2                           | nuclear receptor corepressor 2                                                                |
| 0,82 | CUEDC2                          | CUE domain containing 2                                                                       |
| 0,82 | GH2                             | growth hormone 2                                                                              |
| 0,82 | PBX4                            | pre-B-cell leukemia homeobox 4                                                                |
| 0,82 | OPCML                           | opioid binding protein/cell adhesion molecule-like                                            |
| 0,82 | PADI3                           | peptidyl arginine deiminase, type III                                                         |
| 0,82 | ABCC8                           | ATP binding cassette subfamily C member 8                                                     |
| 0,82 | SUSD6                           | sushi domain containing 6                                                                     |
| 0,82 | CHD3                            | chromodomain helicase DNA binding protein 3                                                   |
| 0,82 | AIM1L                           | absent in melanoma 1-like                                                                     |
| 0,82 | BBS2                            | Bardet-Biedl syndrome 2                                                                       |
| 0,82 | SLX4                            | SLX4 structure-specific endonuclease subunit                                                  |
| 0,82 | GLI3                            | GLI family zinc finger 3                                                                      |
| 0,82 | ICAM2                           | intercellular adhesion molecule 2                                                             |
| 0,82 | FAM167A                         | family with sequence similarity 167, member A                                                 |
| 0,82 | PCDHB15                         | protocadherin beta 15                                                                         |
| 0,82 | HBQ1                            | hemoglobin, theta 1                                                                           |
| 0,82 | C9orf92                         | chromosome 9 open reading frame 92                                                            |
| 0,82 | INPP5D                          | inositol polyphosphate-5-phosphatase D                                                        |
| 0,82 | MAGED4B;<br>MAGED4;<br>SNORA11D | melanoma antigen family D4B; melanoma antigen family D4; small nucleolar RNA, H/ACA box 11D   |
| 0,82 | HOXD4                           | homeobox D4                                                                                   |
| 0,82 | TSPAN5                          | tetraspanin 5                                                                                 |
| 0,82 | ZNF483                          | zinc finger protein 483                                                                       |
| 0,82 | OCLN                            | occludin                                                                                      |
| 0,82 | GUCY1A3                         | guanylate cyclase 1, soluble, alpha 3                                                         |
| 0,82 | SETBP1                          | SET binding protein 1                                                                         |
| 0,82 | GPX7                            | glutathione peroxidase 7                                                                      |

|      |                    |                                                                                                                                 |
|------|--------------------|---------------------------------------------------------------------------------------------------------------------------------|
| 0,82 | HIST1H4A           | histone cluster 1, H4a                                                                                                          |
| 0,82 | BET1L              | Bet1 golgi vesicular membrane trafficking protein-like                                                                          |
| 0,82 | BAZ2B              | bromodomain adjacent to zinc finger domain 2B                                                                                   |
| 0,82 | CST5               | cystatin D                                                                                                                      |
| 0,82 | SPP1               | secreted phosphoprotein 1                                                                                                       |
| 0,82 | RAG1               | recombination activating gene 1                                                                                                 |
| 0,82 | SPNS2              | spinster homolog 2 (Drosophila)                                                                                                 |
| 0,81 | GOLGA8K;<br>ULK4P1 | golgin A8 family, member K; ULK4 pseudogene 1                                                                                   |
| 0,81 | SP4                | Sp4 transcription factor                                                                                                        |
| 0,81 | RGS12              | regulator of G-protein signaling 12                                                                                             |
| 0,81 | TMEM72             | transmembrane protein 72                                                                                                        |
| 0,81 | CHST7              | carbohydrate (N-acetylglucosamine 6-O)<br>sulfotransferase 7                                                                    |
| 0,81 | KRT33B             | keratin 33B, type I                                                                                                             |
| 0,81 | FBN3; mumari       | Zhang2013 ALT_ACCEPTOR, ALT_DONOR, coding,<br>INTERNAL, intronic best transcript NM_032447;<br>Transcript Identified by AceView |
| 0,81 | WDR25              | WD repeat domain 25                                                                                                             |
| 0,81 | FBXW9              | F-box and WD repeat domain containing 9                                                                                         |
| 0,81 | PGM2L1             | phosphoglucomutase 2-like 1                                                                                                     |
| 0,81 | ALMS1              | Alstrom syndrome protein 1                                                                                                      |
| 0,81 | AKAP9              | A kinase (PRKA) anchor protein 9                                                                                                |
| 0,81 | CUX1               | cut-like homeobox 1                                                                                                             |
| 0,81 | GXYLT2             | glucoside xylosyltransferase 2                                                                                                  |
| 0,81 | MAGEE1             | MAGE family member E1                                                                                                           |
| 0,81 | ALPI               | alkaline phosphatase, intestinal                                                                                                |
| 0,81 | SPANXN4            | SPANX family, member N4                                                                                                         |
| 0,81 | TMEM2              | transmembrane protein 2                                                                                                         |
| 0,81 | AHNAK              | AHNAK nucleoprotein                                                                                                             |
| 0,81 | SDR9C7             | short chain dehydrogenase/reductase family 9C,<br>member 7                                                                      |
| 0,81 | PLXNB2             | plexin B2                                                                                                                       |
| 0,81 | CREB3L4            | cAMP responsive element binding protein 3-like 4                                                                                |
| 0,81 | PROL1              | proline rich, lacrimal 1                                                                                                        |
| 0,81 | LRP1               | LDL receptor related protein 1                                                                                                  |
| 0,81 | ZNF780A            | zinc finger protein 780A                                                                                                        |
| 0,81 | CD19               | CD19 molecule                                                                                                                   |
| 0,81 | GBX2               | gastrulation brain homeobox 2                                                                                                   |
| 0,81 | FLNA               | filamin A, alpha                                                                                                                |
| 0,81 | PDIA5; MIR7110     | protein disulfide isomerase family A, member 5;<br>microRNA 7110                                                                |
| 0,81 | OLFM1              | olfactomedin 1                                                                                                                  |
| 0,81 | TDRD12             | tudor domain containing 12                                                                                                      |
| 0,81 | UBA7; MIR5193      | ubiquitin-like modifier activating enzyme 7; microRNA<br>5193                                                                   |
| 0,81 | RNF19A             | ring finger protein 19A, RBR E3 ubiquitin protein<br>ligase                                                                     |
| 0,81 | FRRS1L             | ferric-chelate reductase 1-like                                                                                                 |

|      |                              |                                                                                                                  |
|------|------------------------------|------------------------------------------------------------------------------------------------------------------|
| 0,81 | ARIH2OS                      | ariadne homolog 2 opposite strand                                                                                |
| 0,81 | NDUFA10                      | NADH dehydrogenase (ubiquinone) 1 alpha subcomplex, 10, 42kDa                                                    |
| 0,81 | ERVV-2                       | endogenous retrovirus group V, member 2                                                                          |
| 0,81 | JAK1                         | Janus kinase 1                                                                                                   |
| 0,81 | DNA2                         | DNA replication helicase/nuclease 2                                                                              |
| 0,81 | CCL14; CCL15;<br>CCL15-CCL14 | chemokine (C-C motif) ligand 14; chemokine (C-C motif) ligand 15; CCL15-CCL14 readthrough (NMD candidate)        |
| 0,81 | C10orf12                     | chromosome 10 open reading frame 12                                                                              |
| 0,81 | SEMA4A                       | sema domain, immunoglobulin domain (Ig), transmembrane domain (TM) and short cytoplasmic domain, (semaphorin) 4A |
| 0,81 | PLAC4                        | placenta specific 4                                                                                              |
| 0,81 | NDEL1                        | nudE neurodevelopment protein 1-like 1                                                                           |
| 0,81 | PHLPP2                       | PH domain and leucine rich repeat protein phosphatase 2                                                          |
| 0,81 | CCDC84                       | coiled-coil domain containing 84                                                                                 |
| 0,81 | TAF11                        | TAF11 RNA polymerase II, TATA box binding protein (TBP)-associated factor, 28kDa                                 |
| 0,81 | SAT1                         | spermidine/spermine N1-acetyltransferase 1                                                                       |
| 0,81 | GNAO1                        | guanine nucleotide binding protein (G protein), alpha activating activity polypeptide O                          |
| 0,81 | PRKDC                        | protein kinase, DNA-activated, catalytic polypeptide                                                             |
| 0,81 | ZFYVE1                       | zinc finger, FYVE domain containing 1                                                                            |
| 0,81 | CLEC5A                       | C-type lectin domain family 5, member A                                                                          |
| 0,81 | SPAG1                        | sperm associated antigen 1                                                                                       |
| 0,81 | ZNF165                       | zinc finger protein 165                                                                                          |
| 0,81 | HYKK                         | hydroxylysine kinase                                                                                             |
| 0,81 | BIRC6                        | baculoviral IAP repeat containing 6                                                                              |
| 0,81 | GRIN2D                       | glutamate receptor, ionotropic, N-methyl D-aspartate 2D                                                          |
| 0,81 | ZC3H12B                      | zinc finger CCCH-type containing 12B                                                                             |
| 0,81 | PMEL                         | premelanosome protein                                                                                            |
| 0,81 | SLC18A2                      | solute carrier family 18 (vesicular monoamine transporter), member 2                                             |
| 0,81 | ZNF354C                      | zinc finger protein 354C                                                                                         |
| 0,81 | NBAS                         | neuroblastoma amplified sequence                                                                                 |
| 0,81 | ROBO2                        | roundabout guidance receptor 2                                                                                   |
| 0,81 | ZKSCAN7                      | zinc finger with KRAB and SCAN domains 7                                                                         |
| 0,81 | DACH1                        | Memczak2013 ANTISENSE, coding, INTERNAL, intronic best transcript NM_080760                                      |
| 0,81 | DNAJC5B                      | DnaJ (Hsp40) homolog, subfamily C, member 5 beta                                                                 |
| 0,81 | PTPDC1                       | protein tyrosine phosphatase domain containing 1                                                                 |
| 0,81 | HSD3B2                       | hydroxy-delta-5-steroid dehydrogenase, 3 beta- and steroid delta-isomerase 2                                     |
| 0,81 | TSPAN17                      | tetraspanin 17                                                                                                   |
| 0,81 | PRKAR1B                      | protein kinase, cAMP-dependent, regulatory, type I, beta                                                         |
| 0,81 | DPY19L3                      | dpy-19-like 3 (C. elegans)                                                                                       |
| 0,81 | CBLC                         | Cbl proto-oncogene C, E3 ubiquitin protein ligase                                                                |

|      |          |                                                                                                    |
|------|----------|----------------------------------------------------------------------------------------------------|
| 0,81 | SPRR2A   | small proline-rich protein 2A                                                                      |
| 0,81 | CD83     | CD83 molecule                                                                                      |
| 0,81 | MIER2    | Zhang2013 ALT_ACCEPTOR, ALT_DONOR, coding, INTERNAL, intronic, OVERLAPTX best transcript NM_017550 |
| 0,81 | INPP5A   | Transcript Identified by AceView, Entrez Gene ID(s) 3632                                           |
| 0,81 | OGFOD2   | 2-oxoglutarate and iron-dependent oxygenase domain containing 2                                    |
| 0,81 | OGFRL1   | opioid growth factor receptor-like 1                                                               |
| 0,81 | EDEM1    | Transcript Identified by AceView, Entrez Gene ID(s) 9695                                           |
| 0,81 | SLC9A4   | solute carrier family 9, subfamily A (NHE4, cation proton antiporter 4), member 4                  |
| 0,81 | KCNS2    | potassium voltage-gated channel, modifier subfamily S, member 2                                    |
| 0,81 | SLC6A14  | solute carrier family 6 (amino acid transporter), member 14                                        |
| 0,81 | ALOX5    | Transcript Identified by AceView, Entrez Gene ID(s) 240                                            |
| 0,81 | AIP      | aryl hydrocarbon receptor interacting protein                                                      |
| 0,81 | ACADS    | acyl-CoA dehydrogenase, C-2 to C-3 short chain                                                     |
| 0,81 | LRP6     | LDL receptor related protein 6                                                                     |
| 0,81 | STEAP2   | STEAP family member 2, metalloredutase                                                             |
| 0,81 | HIPK3    | homeodomain interacting protein kinase 3                                                           |
| 0,81 | MAD2L2   | MAD2 mitotic arrest deficient-like 2 (yeast)                                                       |
| 0,81 | MAP2K1   | Transcript Identified by AceView, Entrez Gene ID(s) 5604                                           |
| 0,81 | C20orf85 | chromosome 20 open reading frame 85                                                                |
| 0,81 | B3GALT4  | UDP-Gal:betaGlcNAc beta 1,3-galactosyltransferase 4                                                |
| 0,81 | KCNV2    | potassium channel, voltage gated modifier subfamily V, member 2                                    |
| 0,81 | DLG2     | discs, large homolog 2 (Drosophila)                                                                |
| 0,81 | SLC12A7  | solute carrier family 12 (potassium/chloride transporter), member 7                                |
| 0,81 | KIAA1644 | KIAA1644                                                                                           |
| 0,81 | PLVAP    | plasmalemma vesicle associated protein                                                             |
| 0,81 | REV3L    | REV3 like, DNA directed polymerase zeta catalytic subunit                                          |
| 0,81 | OTUD7B   | OTU deubiquitinase 7B                                                                              |
| 0,81 | KAT6A    | K(lysine) acetyltransferase 6A                                                                     |
| 0,81 | ERBB4    | Transcript Identified by AceView, Entrez Gene ID(s) 2066                                           |
| 0,81 | ELOVL4   | ELOVL fatty acid elongase 4                                                                        |
| 0,81 | CD33     | CD33 molecule                                                                                      |
| 0,81 | AQP1     | aquaporin 1 (Colton blood group)                                                                   |
| 0,81 | RASAL1   | RAS protein activator like 1 (GAP1 like)                                                           |
| 0,81 | RMDN2    | regulator of microtubule dynamics 2                                                                |
| 0,81 | TMEM71   | transmembrane protein 71                                                                           |
| 0,81 | TAAR5    | trace amine associated receptor 5                                                                  |

|      |                                            |                                                                                                       |
|------|--------------------------------------------|-------------------------------------------------------------------------------------------------------|
| 0,81 | NAIP                                       | NLR family, apoptosis inhibitory protein                                                              |
| 0,81 | NCOA2                                      | nuclear receptor coactivator 2                                                                        |
| 0,81 | KMT2D                                      | lysine (K)-specific methyltransferase 2D                                                              |
| 0,81 | MED13L                                     | mediator complex subunit 13-like                                                                      |
| 0,81 | LOC100506388;<br>RP11-1260E13.4;<br>hosaru | uncharacterized LOC100506388; Transcript Identified by AceView; novel transcript, antisense to RPH3AL |
| 0,81 | IQGAP2                                     | IQ motif containing GTPase activating protein 2                                                       |
| 0,81 | ZNF546                                     | zinc finger protein 546                                                                               |
| 0,81 | HTRA1                                      | HtrA serine peptidase 1                                                                               |
| 0,81 | TIAL1                                      | Transcript Identified by AceView, Entrez Gene ID(s) 7073                                              |
| 0,81 | HERC2                                      | HECT and RLD domain containing E3 ubiquitin protein ligase 2                                          |
| 0,81 | PPL                                        | periplakin                                                                                            |
| 0,81 | PDE9A                                      | phosphodiesterase 9A                                                                                  |
| 0,81 | ILF2                                       | Jeck2013 ALT_DONOR, coding, INTERNAL, intronic best transcript NM_004515                              |
| 0,81 | METTL16                                    | methyltransferase like 16                                                                             |
| 0,81 | CRHR1                                      | corticotropin releasing hormone receptor 1                                                            |
| 0,81 | PRRT4                                      | proline-rich transmembrane protein 4                                                                  |
| 0,81 | KRTAP9-1                                   | keratin associated protein 9-1                                                                        |
| 0,81 | EFCAB8                                     | EF-hand calcium binding domain 8                                                                      |
| 0,81 | KLF12                                      | Kruppel-like factor 12                                                                                |
| 0,80 | HUWE1                                      | HECT, UBA and WWE domain containing 1, E3 ubiquitin protein ligase                                    |
| 0,80 | C7orf60                                    | chromosome 7 open reading frame 60                                                                    |
| 0,80 | REG3A                                      | regenerating islet-derived 3 alpha                                                                    |
| 0,80 | XPNPEP1                                    | Transcript Identified by AceView, Entrez Gene ID(s) 7511                                              |
| 0,80 | PLEKHG2                                    | pleckstrin homology domain containing, family G (with RhoGef domain) member 2                         |
| 0,80 | MGMT                                       | O-6-methylguanine-DNA methyltransferase                                                               |
| 0,80 | ACBD4                                      | acyl-CoA binding domain containing 4                                                                  |
| 0,80 | PNMA6A                                     | paraneoplastic Ma antigen family member 6A                                                            |
| 0,80 | CTPS2                                      | Transcript Identified by AceView, Entrez Gene ID(s) 56474                                             |
| 0,80 | PPFIBP2                                    | PTPRF interacting protein, binding protein 2 (liprin beta 2)                                          |
| 0,80 | TNMD                                       | tenomodulin                                                                                           |
| 0,80 | DENND3                                     | DENN/MADD domain containing 3                                                                         |
| 0,80 | ASB16                                      | ankyrin repeat and SOCS box containing 16                                                             |
| 0,80 | TREML1                                     | triggering receptor expressed on myeloid cells-like 1                                                 |
| 0,80 | UNC45B                                     | unc-45 myosin chaperone B                                                                             |
| 0,80 | SPEN                                       | spen family transcriptional repressor                                                                 |
| 0,80 | CHIC2                                      | cysteine rich hydrophobic domain 2                                                                    |
| 0,80 | SOCS3                                      | suppressor of cytokine signaling 3                                                                    |
| 0,80 | LOC730668;<br>CITF22-92A6.2                | dynein heavy chain -like pseudogene; TEC                                                              |
| 0,80 | FAN1                                       | FANCD2/FANCI-associated nuclease 1                                                                    |

|      |                       |                                                                                                        |
|------|-----------------------|--------------------------------------------------------------------------------------------------------|
| 0,80 | DAB1                  | Dab, reelin signal transducer, homolog 1 (Drosophila)                                                  |
| 0,80 | ADCY10                | adenylate cyclase 10 (soluble)                                                                         |
| 0,80 | RSPH6A                | radial spoke head 6 homolog A (Chlamydomonas)                                                          |
| 0,80 | TMEM26                | transmembrane protein 26                                                                               |
| 0,80 | SLC25A27              | solute carrier family 25, member 27                                                                    |
| 0,80 | PALD1                 | phosphatase domain containing, paladin 1                                                               |
| 0,80 | INAFM1                | InaF-motif containing 1                                                                                |
| 0,80 | REXO1L1P;<br>REXO1L3P | REX1, RNA exonuclease 1 homolog-like 1, pseudogene; REX1, RNA exonuclease 1 homolog-like 3, pseudogene |
| 0,80 | SASH1                 | SAM and SH3 domain containing 1                                                                        |
| 0,80 | MDN1                  | midasin AAA ATPase 1                                                                                   |
| 0,80 | DAPK2                 | death-associated protein kinase 2                                                                      |
| 0,80 | IFFO2                 | intermediate filament family orphan 2                                                                  |
| 0,80 | SNAPC4                | Zhang2013 ALT_ACCEPTOR, ALT_DONOR, coding, INTERNAL, intronic best transcript NM_003086                |
| 0,80 | DIP2C                 | disco-interacting protein 2 homolog C                                                                  |
| 0,80 | P4HA3                 | prolyl 4-hydroxylase, alpha polypeptide III                                                            |
| 0,80 | FAM84A                | family with sequence similarity 84, member A                                                           |
| 0,80 | COL4A4                | collagen, type IV, alpha 4                                                                             |
| 0,80 | GALR3                 | galanin receptor 3                                                                                     |
| 0,80 | RAB27A                | RAB27A, member RAS oncogene family                                                                     |
| 0,80 | FAM83B                | family with sequence similarity 83, member B                                                           |
| 0,80 | KRTAP10-10            | keratin associated protein 10-10                                                                       |
| 0,80 | CCDC120               | coiled-coil domain containing 120                                                                      |
| 0,80 | NHSL1                 | NHS-like 1                                                                                             |
| 0,80 | NEURL4                | neuralized E3 ubiquitin protein ligase 4                                                               |
| 0,80 | GRK5                  | Memczak2013 ANTISENSE, coding, INTERNAL, intronic best transcript NM_005308                            |
| 0,80 | KMT2C                 | lysine (K)-specific methyltransferase 2C                                                               |
| 0,80 | MCOLN3                | mucolipin 3                                                                                            |
| 0,80 | SLC6A16               | solute carrier family 6, member 16                                                                     |
| 0,80 | NPY4R                 | neuropeptide Y receptor Y4                                                                             |
| 0,80 | CYP21A2               | cytochrome P450, family 21, subfamily A, polypeptide 2                                                 |
| 0,80 | KNDC1                 | Transcript Identified by AceView, Entrez Gene ID(s) 85442                                              |
| 0,80 | RBP1                  | retinol binding protein 1, cellular                                                                    |
| 0,80 | KIF24                 | kinesin family member 24                                                                               |
| 0,80 | SBSPO1                | somatomedin B and thrombospondin type 1 domain containing                                              |
| 0,80 | MYO9A                 | myosin IXA                                                                                             |
| 0,80 | ZKSCAN7               | zinc finger with KRAB and SCAN domains 7                                                               |
| 0,80 | GLYAT                 | glycine-N-acyltransferase                                                                              |
| 0,80 | APPL2                 | adaptor protein, phosphotyrosine interaction, PH domain and leucine zipper containing 2                |
| 0,80 | WNK1                  | WNK lysine deficient protein kinase 1                                                                  |
| 0,80 | KRTAP15-1             | keratin associated protein 15-1                                                                        |

|      |                     |                                                                                                                          |
|------|---------------------|--------------------------------------------------------------------------------------------------------------------------|
| 0,80 | RPS4X               | Zhang2013 ALT_ACCEPTOR, ALT_DONOR, coding, INTERNAL, intronic best transcript NM_001007                                  |
| 0,80 | KRTAP10-9           | keratin associated protein 10-9                                                                                          |
| 0,80 | MAP7                | microtubule-associated protein 7                                                                                         |
| 0,80 | SVOPL               | SVOP-like                                                                                                                |
| 0,80 | KLF9                | Kruppel-like factor 9                                                                                                    |
| 0,80 | TPH2                | tryptophan hydroxylase 2                                                                                                 |
| 0,80 | CPEB2               | cytoplasmic polyadenylation element binding protein 2                                                                    |
| 0,80 | flawmawbo;<br>GBP3  | Transcript Identified by AceView; Memczak2013 ANTISENSE, CDS, coding, INTERNAL, intronic, UTR5 best transcript NM_018284 |
| 0,80 | KCND1               | potassium channel, voltage gated Shal related subfamily D, member 1                                                      |
| 0,80 | TBC1D30             | TBC1 domain family, member 30                                                                                            |
| 0,80 | KCNK1               | Transcript Identified by AceView, Entrez Gene ID(s) 3775                                                                 |
| 0,80 | FAP                 | fibroblast activation protein alpha                                                                                      |
| 0,80 | ADCY2               | adenylate cyclase 2 (brain)                                                                                              |
| 0,80 | MCTP2               | multiple C2 domains, transmembrane 2                                                                                     |
| 0,80 | HERC2P3             | hect domain and RLD 2 pseudogene 3                                                                                       |
| 0,80 | PRSS38              | protease, serine 38                                                                                                      |
| 0,80 | DIRC1               | disrupted in renal carcinoma 1                                                                                           |
| 0,80 | CWH43               | cell wall biogenesis 43 C-terminal homolog                                                                               |
| 0,80 | UBL4B               | ubiquitin-like 4B                                                                                                        |
| 0,80 | PLA1A               | phospholipase A1 member A                                                                                                |
| 0,80 | RRBP1               | Zhang2013 ALT_ACCEPTOR, ALT_DONOR, coding, INTERNAL, intronic best transcript NM_001042576                               |
| 0,80 | MOCS1               | molybdenum cofactor synthesis 1                                                                                          |
| 0,80 | ELAVL2              | ELAV like neuron-specific RNA binding protein 2                                                                          |
| 0,80 | FAM173B             | Transcript Identified by AceView, Entrez Gene ID(s) 134145                                                               |
| 0,80 | SLC16A2             | solute carrier family 16, member 2 (thyroid hormone transporter)                                                         |
| 0,80 | ZNF660              | zinc finger protein 660                                                                                                  |
| 0,80 | KLHDC8B             | kelch domain containing 8B                                                                                               |
| 0,80 | BNC2                | basonuclin 2                                                                                                             |
| 0,80 | POU1F1              | POU class 1 homeobox 1                                                                                                   |
| 0,80 | ITPRIPL1            | inositol 1,4,5-trisphosphate receptor interacting protein-like 1                                                         |
| 0,80 | LRRC37A             | leucine rich repeat containing 37A                                                                                       |
| 0,80 | SPAG11A;<br>SPAG11B | sperm associated antigen 11A; sperm associated antigen 11B                                                               |
| 0,80 | PRLR                | prolactin receptor                                                                                                       |
| 0,80 | SLC8A3              | solute carrier family 8 (sodium/calcium exchanger), member 3                                                             |
| 0,80 | SIGLEC15            | sialic acid binding Ig-like lectin 15                                                                                    |
| 0,80 | CTXN3               | cortexin 3                                                                                                               |
| 0,80 | SCNN1G              | sodium channel, non voltage gated 1 gamma subunit                                                                        |

|      |                             |                                                                                  |
|------|-----------------------------|----------------------------------------------------------------------------------|
| 0,80 | KIAA0825                    | KIAA0825                                                                         |
| 0,80 | PHF20L1                     | Transcript Identified by AceView, Entrez Gene ID(s)<br>51105                     |
| 0,80 | CLMN                        | calmin (calponin-like, transmembrane)                                            |
| 0,80 | KCTD19                      | potassium channel tetramerization domain containing<br>19                        |
| 0,80 | YEATS4                      | Transcript Identified by AceView, Entrez Gene ID(s)<br>8089                      |
| 0,80 | PON3                        | paraoxonase 3                                                                    |
| 0,80 | SH3BP5L                     | SH3-binding domain protein 5-like                                                |
| 0,80 | KLHL34                      | kelch-like family member 34                                                      |
| 0,80 | PDZD2                       | PDZ domain containing 2                                                          |
| 0,80 | S1PR2                       | sphingosine-1-phosphate receptor 2                                               |
| 0,80 | KIRREL3-AS3                 | KIRREL3 antisense RNA 3                                                          |
| 0,80 | CCDC159                     | coiled-coil domain containing 159                                                |
| 0,80 | DOCK3                       | dedicator of cytokinesis 3                                                       |
| 0,80 | CBY3                        | chibby homolog 3 (Drosophila)                                                    |
| 0,80 | TAAR9                       | trace amine associated receptor 9 (gene/pseudogene)                              |
| 0,80 | PTGFRN                      | prostaglandin F2 receptor inhibitor                                              |
| 0,80 | MAPK8IP1                    | mitogen-activated protein kinase 8 interacting protein 1                         |
| 0,80 | XAGE3                       | X antigen family, member 3                                                       |
| 0,80 | DNASE2B                     | deoxyribonuclease II beta                                                        |
| 0,80 | SNX33                       | sorting nexin 33                                                                 |
| 0,80 | FAM118A                     | family with sequence similarity 118, member A                                    |
| 0,79 | TAS2R20                     | taste receptor, type 2, member 20                                                |
| 0,79 | LOC100129216                | beta-defensin 131-like                                                           |
| 0,79 | AMDHD1                      | amidohydrolase domain containing 1                                               |
| 0,79 | ARHGEF10L                   | Rho guanine nucleotide exchange factor 10 like                                   |
| 0,79 | PBXIP1                      | pre-B-cell leukemia homeobox interacting protein 1                               |
| 0,79 | VEPH1                       | ventricular zone expressed PH domain containing 1                                |
| 0,79 | KIAA1549L                   | KIAA1549-like                                                                    |
| 0,79 | HCP5                        | HLA complex P5 (non-protein coding)                                              |
| 0,79 | FAM198B                     | family with sequence similarity 198, member B                                    |
| 0,79 | RALGAPA2                    | Ral GTPase activating protein, alpha subunit 2<br>(catalytic)                    |
| 0,79 | LGI2                        | leucine-rich repeat LGI family, member 2                                         |
| 0,79 | CHFR                        | checkpoint with forkhead and ring finger domains, E3<br>ubiquitin protein ligase |
| 0,79 | HK2                         | hexokinase 2                                                                     |
| 0,79 | GLT6D1                      | glycosyltransferase 6 domain containing 1                                        |
| 0,79 | LOC339059; RP5-<br>1142A6.8 | uncharacterized LOC339059; novel transcript,<br>antisense to FAM38A              |
| 0,79 | COL4A5                      | collagen, type IV, alpha 5                                                       |
| 0,79 | BPIFB3                      | BPI fold containing family B, member 3                                           |
| 0,79 | MEIS1                       | Transcript Identified by AceView, Entrez Gene ID(s)<br>4211                      |
| 0,79 | BPIFB6                      | BPI fold containing family B, member 6                                           |
| 0,79 | TTC30B                      | tetratricopeptide repeat domain 30B                                              |

|      |                                  |                                                                                        |
|------|----------------------------------|----------------------------------------------------------------------------------------|
| 0,79 | APBB3                            | amyloid beta (A4) precursor protein-binding, family B, member 3                        |
| 0,79 | PRR30                            | proline rich 30                                                                        |
| 0,79 | NPTX1                            | neuronal pentraxin I                                                                   |
| 0,79 | EPHA5                            | EPH receptor A5                                                                        |
| 0,79 | KRBA2                            | KRAB-A domain containing 2                                                             |
| 0,79 | UBR4                             | ubiquitin protein ligase E3 component n-recognin 4                                     |
| 0,79 | GRIN2A                           | glutamate receptor, ionotropic, N-methyl D-aspartate 2A                                |
| 0,79 | MFAP5                            | microfibrillar associated protein 5                                                    |
| 0,79 | LDHAL6B                          | lactate dehydrogenase A-like 6B                                                        |
| 0,79 | PCSK6                            | proprotein convertase subtilisin/kexin type 6                                          |
| 0,79 | SYBU                             | syntabulin (syntaxin-interacting)                                                      |
| 0,79 | ADSSL1                           | adenylosuccinate synthase like 1                                                       |
| 0,79 | FAM107B                          | family with sequence similarity 107, member B                                          |
| 0,79 | SSPN                             | sarcospan                                                                              |
| 0,79 | CCDC149                          | coiled-coil domain containing 149                                                      |
| 0,79 | ATP9A                            | ATPase, class II, type 9A                                                              |
| 0,79 | ARHGEF12                         | Rho guanine nucleotide exchange factor (GEF) 12                                        |
| 0,79 | TMEM218                          | transmembrane protein 218                                                              |
| 0,79 | INTS1                            | integrator complex subunit 1                                                           |
| 0,79 | ATP10A                           | ATPase, class V, type 10A                                                              |
| 0,79 | SPTAN1                           | spectrin, alpha, non-erythrocytic 1                                                    |
| 0,79 | OCM2                             | oncomodulin 2                                                                          |
| 0,79 | ASH1L; MIR555                    | ash1 (absent, small, or homeotic)-like (Drosophila); microRNA 555                      |
| 0,79 | LOC100144595; AC009227.2; tikure | uncharacterized LOC100144595; novel transcript; Transcript Identified by AceView       |
| 0,79 | ABHD1                            | abhydrolase domain containing 1                                                        |
| 0,79 | DEFA5                            | defensin, alpha 5, Paneth cell-specific                                                |
| 0,79 | CGREF1                           | cell growth regulator with EF-hand domain 1                                            |
| 0,79 | PIWIL4                           | piwi-like RNA-mediated gene silencing 4                                                |
| 0,79 | SPATA3                           | spermatogenesis associated 3                                                           |
| 0,79 | PITPNC1                          | phosphatidylinositol transfer protein, cytoplasmic 1                                   |
| 0,79 | LCA5L                            | Leber congenital amaurosis 5-like                                                      |
| 0,79 | COQ6                             | coenzyme Q6 monooxygenase                                                              |
| 0,79 | CCDC34                           | Transcript Identified by AceView, Entrez Gene ID(s) 91057                              |
| 0,79 | CLRN2                            | clarin 2                                                                               |
| 0,79 | TMX4                             | thioredoxin-related transmembrane protein 4                                            |
| 0,79 | UCK2                             | Jeck2013 ALT_ACCEPTOR, ALT_DONOR, coding, INTERNAL, intronic best transcript NM_012474 |
| 0,79 | FAM129A                          | family with sequence similarity 129, member A                                          |
| 0,79 | TTLL8                            | tubulin tyrosine ligase-like family member 8                                           |
| 0,79 | ANKRD34B                         | ankyrin repeat domain 34B                                                              |
| 0,79 | POLD4                            | polymerase (DNA-directed), delta 4, accessory subunit                                  |
| 0,79 | COCH                             | cochlin                                                                                |
| 0,79 | STXBP5L                          | syntaxin binding protein 5-like                                                        |

|      |                |                                                                                              |
|------|----------------|----------------------------------------------------------------------------------------------|
| 0,79 | CNTN3          | contactin 3 (plasmacytoma associated)                                                        |
| 0,79 | NAV1           | neuron navigator 1                                                                           |
| 0,79 | PLCE1          | phospholipase C, epsilon 1                                                                   |
| 0,79 | BACH2          | Memczak2013 ALT_ACCEPTOR, ALT_DONOR, coding, INTERNAL, intronic best transcript NM_001170794 |
| 0,79 | C20orf196      | chromosome 20 open reading frame 196                                                         |
| 0,79 | SAMD4A         | Jeck2013 ALT_ACCEPTOR, ALT_DONOR, coding, INTERNAL, intronic best transcript NM_015589       |
| 0,79 | ZNF77          | zinc finger protein 77                                                                       |
| 0,79 | TMEM71         | transmembrane protein 71                                                                     |
| 0,79 | PLCB4          | phospholipase C, beta 4                                                                      |
| 0,79 | DTHD1          | death domain containing 1                                                                    |
| 0,79 | HNF1B          | HNF1 homeobox B                                                                              |
| 0,79 | EFCAB12        | EF-hand calcium binding domain 12                                                            |
| 0,79 | SYT1           | synaptotagmin I                                                                              |
| 0,79 | CCL3           | chemokine (C-C motif) ligand 3                                                               |
| 0,79 | LINC00656      | long intergenic non-protein coding RNA 656                                                   |
| 0,79 | HTR2C          | 5-hydroxytryptamine (serotonin) receptor 2C, G protein-coupled                               |
| 0,79 | KATNA1         | katanin p60 (ATPase containing) subunit A 1                                                  |
| 0,79 | MMP10          | matrix metalloproteinase 10                                                                  |
| 0,79 | ABCD3          | Transcript Identified by AceView, Entrez Gene ID(s) 5825                                     |
| 0,79 | FOXR2          | forkhead box R2                                                                              |
| 0,79 | ZFYVE21        | zinc finger, FYVE domain containing 21                                                       |
| 0,79 | SPC25          | SPC25, NDC80 kinetochore complex component                                                   |
| 0,79 | KRTAP9-6       | keratin associated protein 9-6                                                               |
| 0,79 | SLC44A5        | solute carrier family 44, member 5                                                           |
| 0,79 | RGN            | regucalcin                                                                                   |
| 0,79 | RIPPLY3        | rippy transcriptional repressor 3                                                            |
| 0,79 | CHST12         | carbohydrate (chondroitin 4) sulfotransferase 12                                             |
| 0,79 | STAU2-AS1      | STAU2 antisense RNA 1                                                                        |
| 0,79 | TTLL1          | tubulin tyrosine ligase-like family member 1                                                 |
| 0,79 | ATP2B4         | ATPase, Ca++ transporting, plasma membrane 4                                                 |
| 0,79 | RNF217         | ring finger protein 217                                                                      |
| 0,79 | KHDC1          | KH homology domain containing 1                                                              |
| 0,79 | RIMS1          | regulating synaptic membrane exocytosis 1                                                    |
| 0,78 | TMEM207        | transmembrane protein 207                                                                    |
| 0,78 | SERPINB13      | serpin peptidase inhibitor, clade B (ovalbumin), member 13                                   |
| 0,78 | ARHGAP15       | Rho GTPase activating protein 15                                                             |
| 0,78 | PLA2R1         | phospholipase A2 receptor 1                                                                  |
| 0,78 | ALKBH7         | alkB homolog 7                                                                               |
| 0,78 | NBEA           | neurobeachin                                                                                 |
| 0,78 | HFE            | hemochromatosis                                                                              |
| 0,78 | EP300; MIR1281 | E1A binding protein p300; microRNA 1281                                                      |
| 0,78 | FOXO1          | forkhead box O1                                                                              |
| 0,78 | STAC2          | SH3 and cysteine rich domain 2                                                               |
| 0,78 | KLF15          | Kruppel-like factor 15                                                                       |

|      |                       |                                                                                                                           |
|------|-----------------------|---------------------------------------------------------------------------------------------------------------------------|
| 0,78 | SLF1                  | SMC5-SMC6 complex localization factor 1                                                                                   |
| 0,78 | DIXDC1                | DIX domain containing 1                                                                                                   |
| 0,78 | CST9L                 | cystatin 9-like                                                                                                           |
| 0,78 | CIT; MIR1178          | citron rho-interacting serine/threonine kinase;<br>microRNA 1178                                                          |
| 0,78 | COL15A1               | collagen, type XV, alpha 1                                                                                                |
| 0,78 | CYP2J2                | cytochrome P450, family 2, subfamily J, polypeptide 2                                                                     |
| 0,78 | BSND                  | barttin CLCNK-type chloride channel accessory beta subunit                                                                |
| 0,78 | TBXAS1                | thromboxane A synthase 1 (platelet)                                                                                       |
| 0,78 | EPM2A                 | epilepsy, progressive myoclonus type 2A, Lafora disease (laforin)                                                         |
| 0,78 | SBK2                  | SH3 domain binding kinase family, member 2                                                                                |
| 0,78 | LSAMP                 | limbic system-associated membrane protein                                                                                 |
| 0,78 | RGCC                  | regulator of cell cycle                                                                                                   |
| 0,78 | TTC30A                | tetratricopeptide repeat domain 30A                                                                                       |
| 0,78 | DEFB107A;<br>DEFB107B | defensin, beta 107A; defensin, beta 107B                                                                                  |
| 0,78 | APBB1                 | amyloid beta (A4) precursor protein-binding, family B, member 1 (Fe65)                                                    |
| 0,78 | DOCK10                | Transcript Identified by AceView, Entrez Gene ID(s) 55619                                                                 |
| 0,78 | MYO7B                 | myosin VIIb                                                                                                               |
| 0,78 | MIOX                  | myo-inositol oxygenase                                                                                                    |
| 0,78 | PDE4D                 | Memczak2013 ANTISENSE, coding, INTERNAL, intronic best transcript NM_001165899                                            |
| 0,78 | LAMB3;<br>MIR4260     | laminin, beta 3; microRNA 4260                                                                                            |
| 0,78 | TAGLN                 | transgelin                                                                                                                |
| 0,78 | CCDC84                | coiled-coil domain containing 84                                                                                          |
| 0,78 | FGF12                 | fibroblast growth factor 12                                                                                               |
| 0,78 | PHLDB2;<br>PLCXD2     | pleckstrin homology-like domain, family B, member 2; phosphatidylinositol-specific phospholipase C, X domain containing 2 |
| 0,78 | PTPRR                 | protein tyrosine phosphatase, receptor type, R splA/ryanodine receptor domain and SOCS box containing 2                   |
| 0,78 | SPSB2                 |                                                                                                                           |
| 0,78 | TM4SF20               | transmembrane 4 L six family member 20                                                                                    |
| 0,78 | ELF1                  | Transcript Identified by AceView, Entrez Gene ID(s) 1997; 100128628                                                       |
| 0,78 | CPE                   | carboxypeptidase E                                                                                                        |
| 0,78 | RAPH1                 | Ras association (RalGDS/AF-6) and pleckstrin homology domains 1                                                           |
| 0,78 | SLC9A1                | solute carrier family 9, subfamily A (NHE1, cation proton antiporter 1), member 1                                         |
| 0,78 | TMEM25                | transmembrane protein 25                                                                                                  |
| 0,78 | LRP12                 | LDL receptor related protein 12                                                                                           |
| 0,78 | ITGAM                 | integrin, alpha M (complement component 3 receptor 3 subunit)                                                             |
| 0,78 | C19orf57              | chromosome 19 open reading frame 57                                                                                       |

|      |                      |                                                                                               |
|------|----------------------|-----------------------------------------------------------------------------------------------|
| 0,78 | GPC2                 | glypican 2                                                                                    |
| 0,78 | TP53I13              | tumor protein p53 inducible protein 13                                                        |
| 0,78 | FAM134B              | family with sequence similarity 134, member B                                                 |
| 0,78 | FOXS1                | forkhead box S1                                                                               |
| 0,78 | SYPL2                | synaptophysin-like 2                                                                          |
| 0,78 | FANK1                | fibronectin type III and ankyrin repeat domains 1                                             |
| 0,78 | FGF10                | fibroblast growth factor 10                                                                   |
| 0,78 | VLDLR                | very low density lipoprotein receptor                                                         |
| 0,78 | CCDC60               | coiled-coil domain containing 60                                                              |
| 0,78 | RNF44                | ring finger protein 44                                                                        |
| 0,78 | ABCC1                | ATP binding cassette subfamily C member 1                                                     |
| 0,78 | CARD9                | caspase recruitment domain family, member 9                                                   |
| 0,78 | ADPRH                | ADP-ribosylarginine hydrolase                                                                 |
| 0,78 | APTX                 | aprataxin                                                                                     |
| 0,77 | CGA                  | glycoprotein hormones, alpha polypeptide                                                      |
| 0,77 | C3orf22              | chromosome 3 open reading frame 22                                                            |
| 0,77 | AVL9                 | AVL9 homolog (S. cerevisiae)                                                                  |
| 0,77 | TRPV4                | transient receptor potential cation channel, subfamily V, member 4                            |
| 0,77 | WRN                  | Werner syndrome, RecQ helicase-like                                                           |
| 0,77 | SMIM19               | small integral membrane protein 19                                                            |
| 0,77 | SKIDA1               | SKI/DACH domain containing 1                                                                  |
| 0,77 | CCDC80;<br>LINC01279 | coiled-coil domain containing 80; long intergenic non-protein coding RNA 1279                 |
| 0,77 | SLC44A3              | solute carrier family 44, member 3                                                            |
| 0,77 | C5AR2                | complement component 5a receptor 2                                                            |
| 0,77 | INADL                | InaD-like (Drosophila)                                                                        |
| 0,77 | ADAM32               | ADAM metallopeptidase domain 32                                                               |
| 0,77 | PARP9                | poly(ADP-ribose) polymerase family member 9                                                   |
| 0,77 | SLC26A4              | solute carrier family 26 (anion exchanger), member 4                                          |
| 0,77 | CXCL10               | chemokine (C-X-C motif) ligand 10                                                             |
| 0,77 | LAMP3                | lysosomal-associated membrane protein 3                                                       |
| 0,77 | VMAC                 | vimentin-type intermediate filament associated coiled-coil protein                            |
| 0,77 | TRIM38               | tripartite motif containing 38                                                                |
| 0,77 | B3GNTL1              | UDP-GlcNAc:betaGal beta-1,3-N-acetylglucosaminyltransferase-like 1                            |
| 0,77 | MAP2K6               | mitogen-activated protein kinase kinase 6                                                     |
| 0,77 | WDR1                 | Jeck2013 ANTISENSE, CDS, coding, INTERNAL, intronic, OVCODE, OVEXON best transcript NM_017491 |
| 0,77 | FANCM                | Fanconi anemia complementation group M                                                        |
| 0,77 | AP5Z1                | adaptor-related protein complex 5, zeta 1 subunit                                             |
| 0,77 | WDR27                | WD repeat domain 27                                                                           |
| 0,77 | ZNF462               | zinc finger protein 462                                                                       |
| 0,77 | DNAJB5               | DnaJ (Hsp40) homolog, subfamily B, member 5                                                   |
| 0,77 | CKMT1B;<br>CKMT1A    | creatine kinase, mitochondrial 1B; creatine kinase, mitochondrial 1A                          |
| 0,77 | SYT10                | synaptotagmin X                                                                               |

|      |             |                                                                                              |
|------|-------------|----------------------------------------------------------------------------------------------|
| 0,77 | BICD2       | Memczak2013 ALT_ACCEPTOR, ALT_DONOR, coding, INTERNAL, intronic best transcript NM_001003800 |
| 0,77 | GOLGA6C     | golgin A6 family, member C                                                                   |
| 0,77 | PODN        | Transcript Identified by AceView, Entrez Gene ID(s) 127435                                   |
| 0,77 | JARID2      | jumonji, AT rich interactive domain 2                                                        |
| 0,77 | TRIP11      | thyroid hormone receptor interactor 11                                                       |
| 0,77 | TLCD2       | TLC domain containing 2                                                                      |
| 0,77 | OTOP3       | otopetrin 3                                                                                  |
| 0,77 | IGF2R       | insulin-like growth factor 2 receptor                                                        |
| 0,77 | ARHGEF11    | Rho guanine nucleotide exchange factor 11                                                    |
| 0,77 | CRLF1       | cytokine receptor-like factor 1                                                              |
| 0,77 | TC2N        | tandem C2 domains, nuclear                                                                   |
| 0,77 | PDGFRB      | platelet-derived growth factor receptor, beta polypeptide                                    |
| 0,77 | SORT1       | sortilin 1                                                                                   |
| 0,77 | PALM2-AKAP2 | PALM2-AKAP2 readthrough                                                                      |
| 0,77 | SERPINA5    | serpin peptidase inhibitor, clade A (alpha-1 antiproteinase, antitrypsin), member 5          |
| 0,77 | MYBPH       | myosin binding protein H                                                                     |
| 0,77 | GPR85       | G protein-coupled receptor 85                                                                |
| 0,77 | FTH1P18     | ferritin, heavy polypeptide 1 pseudogene 18                                                  |
| 0,77 | LRRTM2      | leucine rich repeat transmembrane neuronal 2                                                 |
| 0,77 | SCRT2       | scratch family zinc finger 2                                                                 |
| 0,77 | DNASE1L2    | deoxyribonuclease I-like 2                                                                   |
| 0,77 | ITGB3       | integrin beta 3                                                                              |
| 0,77 | PAGE5       | P antigen family, member 5 (prostate associated)                                             |
| 0,76 | DDO         | D-aspartate oxidase                                                                          |
| 0,76 | LRP6        | LDL receptor related protein 6                                                               |
| 0,76 | KCNK5       | potassium channel, two pore domain subfamily K, member 5                                     |
| 0,76 | EIF2AK3     | eukaryotic translation initiation factor 2-alpha kinase 3                                    |
| 0,76 | SULT2A1     | sulfotransferase family 2A member 1                                                          |
| 0,76 | ASB4        | ankyrin repeat and SOCS box containing 4                                                     |
| 0,76 | CFAP52      | cilia and flagella associated protein 52                                                     |
| 0,76 | CLEC3B      | C-type lectin domain family 3, member B                                                      |
| 0,76 | ZNF713      | zinc finger protein 713                                                                      |
| 0,76 | KCNG4       | potassium channel, voltage gated modifier subfamily G, member 4                              |
| 0,76 | FRAT2       | frequently rearranged in advanced T-cell lymphomas 2                                         |
| 0,76 | CNTNAP5     | contactin associated protein-like 5                                                          |
| 0,76 | TRIM55      | tripartite motif containing 55                                                               |
| 0,76 | C5orf46     | chromosome 5 open reading frame 46                                                           |
| 0,76 | GABRQ       | gamma-aminobutyric acid (GABA) A receptor, theta                                             |
| 0,76 | SCUBE3      | signal peptide, CUB domain, EGF-like 3                                                       |
| 0,76 | STXBP5      | syntaxin binding protein 5 (tomosyn)                                                         |
| 0,76 | TAS2R14     | taste receptor, type 2, member 14                                                            |

|      |            |                                                                                               |
|------|------------|-----------------------------------------------------------------------------------------------|
| 0,76 | TTC32      | tetratricopeptide repeat domain 32                                                            |
| 0,76 | C2orf54    | chromosome 2 open reading frame 54                                                            |
| 0,76 | LYSMD4     | LysM, putative peptidoglycan-binding, domain containing 4                                     |
| 0,76 | SLAMF7     | SLAM family member 7                                                                          |
| 0,76 | MRPL23     | mitochondrial ribosomal protein L23                                                           |
| 0,76 | DYNC1H1    | dynein, cytoplasmic 1, heavy chain 1                                                          |
| 0,76 | FAM20C     | family with sequence similarity 20, member C                                                  |
| 0,76 | TMEM205    | transmembrane protein 205                                                                     |
| 0,76 | GCC1       | GRIP and coiled-coil domain containing 1                                                      |
| 0,76 | MMP12      | matrix metalloproteinase 12                                                                   |
| 0,76 | POM121L2   | POM121 transmembrane nucleoporin-like 2                                                       |
| 0,76 | GRAMD4     | GRAM domain containing 4                                                                      |
| 0,76 | NANOS1     | nanos homolog 1 (Drosophila)                                                                  |
| 0,76 | RNF213     | ring finger protein 213                                                                       |
| 0,76 | ETV5       | ets variant 5                                                                                 |
| 0,76 | POGZ       | Transcript Identified by AceView, Entrez Gene ID(s) 23126                                     |
| 0,76 | NAIP       | NLR family, apoptosis inhibitory protein                                                      |
| 0,76 | BOD1L1     | bioorientation of chromosomes in cell division 1-like 1                                       |
| 0,76 | ANKRD6     | ankyrin repeat domain 6                                                                       |
| 0,76 | NID1       | nidogen 1                                                                                     |
| 0,76 | OR52E2     | olfactory receptor, family 52, subfamily E, member 2                                          |
| 0,75 | PPBP       | pro-platelet basic protein                                                                    |
| 0,75 | PPM1K      | protein phosphatase, Mg <sup>2+</sup> /Mn <sup>2+</sup> dependent, 1K                         |
| 0,75 | CNTF       | ciliary neurotrophic factor                                                                   |
| 0,75 | GPR183     | G protein-coupled receptor 183                                                                |
| 0,75 | KDM5D      | lysine (K)-specific demethylase 5D                                                            |
| 0,75 | PYGO1      | pygopus family PHD finger 1                                                                   |
| 0,75 | THBS3      | thrombospondin 3                                                                              |
| 0,75 | HGF        | Transcript Identified by AceView, Entrez Gene ID(s) 3082                                      |
| 0,75 | WNT1       | wingless-type MMTV integration site family, member 1                                          |
| 0,75 | STAMBPL1   | STAM binding protein-like 1                                                                   |
| 0,75 | XRCC6BP1   | XRCC6 binding protein 1                                                                       |
| 0,75 | CELSR1     | cadherin, EGF LAG seven-pass G-type receptor 1                                                |
| 0,75 | EDC4       | enhancer of mRNA decapping 4                                                                  |
| 0,75 | GTF3C1     | general transcription factor IIIC subunit 1                                                   |
| 0,75 | ZNF503-AS2 | ZNF503 antisense RNA 2                                                                        |
| 0,75 | HSPB3      | heat shock 27kDa protein 3                                                                    |
| 0,75 | FAT1       | FAT atypical cadherin 1                                                                       |
| 0,75 | SERPINE3   | serpin peptidase inhibitor, clade E (nexin, plasminogen activator inhibitor type 1), member 3 |
| 0,75 | POLB       | polymerase (DNA directed), beta                                                               |
| 0,75 | C14orf178  | chromosome 14 open reading frame 178                                                          |
| 0,75 | CDKL3      | cyclin-dependent kinase-like 3                                                                |
| 0,75 | MYL6       | Memczak2013 ANTISENSE, coding, INTERNAL, intronic best transcript NM_079423                   |

|      |               |                                                                                                 |
|------|---------------|-------------------------------------------------------------------------------------------------|
| 0,75 | ESD           | Transcript Identified by AceView, Entrez Gene ID(s)<br>2098                                     |
| 0,75 | LRRC1         | leucine rich repeat containing 1                                                                |
| 0,75 | CNNM1         | cyclin and CBS domain divalent metal cation transport<br>mediator 1                             |
| 0,75 | PCDHB16       | protocadherin beta 16                                                                           |
| 0,75 | NANOS2        | nanos homolog 2 (Drosophila)                                                                    |
| 0,75 | GRIK2         | glutamate receptor, ionotropic, kainate 2                                                       |
| 0,75 | NPNT          | nephronectin                                                                                    |
| 0,75 | LTBP1         | latent transforming growth factor beta binding protein 1                                        |
| 0,75 | NLGN1         | neuroligin 1                                                                                    |
| 0,75 | PARP16        | poly(ADP-ribose) polymerase family member 16                                                    |
| 0,75 | NAP1L1        | Memczak2013 ALT_ACCEPTOR, ALT_DONOR,<br>coding, INTERNAL, intronic best transcript<br>NM_139207 |
| 0,75 | NPBWR1        | neuropeptides B/W receptor 1                                                                    |
| 0,75 | ABCG1         | ATP binding cassette subfamily G member 1                                                       |
| 0,75 | RNF215        | ring finger protein 215                                                                         |
| 0,75 | MLXIP         | MLX interacting protein                                                                         |
| 0,75 | MYLK          | myosin light chain kinase                                                                       |
| 0,75 | ZFHX3         | zinc finger homeobox 3                                                                          |
| 0,75 | ZBTB10        | zinc finger and BTB domain containing 10                                                        |
| 0,75 | C4orf36       | chromosome 4 open reading frame 36                                                              |
| 0,74 | ZNF554        | zinc finger protein 554                                                                         |
| 0,74 | TLN1; MIR6852 | talin 1; microRNA 6852                                                                          |
| 0,74 | TCF23         | transcription factor 23                                                                         |
| 0,74 | IGSF11        | immunoglobulin superfamily, member 11                                                           |
| 0,74 | CLUL1         | clusterin-like 1 (retinal)                                                                      |
| 0,74 | TANC2         | tetratricopeptide repeat, ankyrin repeat and coiled-coil<br>containing 2                        |
| 0,74 | C1QTNF9B-AS1  | C1QTNF9B antisense RNA 1                                                                        |
| 0,74 | GOLGA6L9      | golgin A6 family-like 9                                                                         |
| 0,74 | ZFYVE9        | zinc finger, FYVE domain containing 9                                                           |
| 0,74 | FAM150B       | family with sequence similarity 150, member B                                                   |
| 0,74 | CRELD1        | cysteine rich with EGF-like domains 1                                                           |
| 0,74 | MAML2         | mastermind-like transcriptional coactivator 2                                                   |
| 0,74 | FBXO32        | F-box protein 32                                                                                |
| 0,74 | THAP9         | THAP domain containing 9                                                                        |
| 0,74 | CLCN5         | chloride channel, voltage-sensitive 5                                                           |
| 0,74 | NR3C2         | nuclear receptor subfamily 3, group C, member 2                                                 |
| 0,74 | TSPAN15       | tetraspanin 15                                                                                  |
| 0,74 | LCK           | LCK proto-oncogene, Src family tyrosine kinase                                                  |
| 0,74 | TEX35         | testis expressed 35                                                                             |
| 0,74 | ADAMTS13      | ADAM metallopeptidase with thrombospondin type 1<br>motif 13                                    |
| 0,74 | CTRC          | chymotrypsin C (caldecrin)                                                                      |
| 0,74 | TFAP2D        | transcription factor AP-2 delta (activating enhancer<br>binding protein 2 delta)                |

|      |                    |                                                                                                    |
|------|--------------------|----------------------------------------------------------------------------------------------------|
| 0,74 | GNG7               | Transcript Identified by AceView, Entrez Gene ID(s)<br>2788                                        |
| 0,74 | ANKRD44            | ankyrin repeat domain 44                                                                           |
| 0,73 | DZIP1L             | DAZ interacting zinc finger protein 1-like                                                         |
| 0,73 | NLRP4              | NLR family, pyrin domain containing 4                                                              |
| 0,73 | HPD                | 4-hydroxyphenylpyruvate dioxygenase                                                                |
| 0,73 | RNF222             | ring finger protein 222                                                                            |
| 0,73 | SFRP5              | secreted frizzled-related protein 5                                                                |
| 0,73 | FAM213B            | Memczak2013 ANTISENSE, coding, INTERNAL,<br>UTR3 best transcript NM_001195737                      |
| 0,73 | SULT1B1            | sulfotransferase family 1B member 1                                                                |
| 0,73 | POTE1              | POTE ankyrin domain family, member I                                                               |
| 0,73 | DGKD               | diacylglycerol kinase, delta 130kDa                                                                |
| 0,73 | CSMD3              | CUB and Sushi multiple domains 3                                                                   |
| 0,73 | TSNAX              | Memczak2013 ANTISENSE, CDS, coding,<br>INTERNAL, UTR3 best transcript NM_005999                    |
| 0,73 | FAT4               | FAT atypical cadherin 4                                                                            |
| 0,73 | ITPR3              | inositol 1,4,5-trisphosphate receptor, type 3                                                      |
| 0,73 | IL13               | interleukin 13                                                                                     |
| 0,73 | ZNF518A            | zinc finger protein 518A                                                                           |
| 0,73 | TRIM66             | tripartite motif containing 66                                                                     |
| 0,73 | LAMA3              | laminin, alpha 3                                                                                   |
| 0,73 | ANKRD29            | ankyrin repeat domain 29                                                                           |
| 0,73 | SERINC5            | Memczak2013 ALT_ACCEPTOR, ALT_DONOR,<br>coding, INTERNAL, intronic best transcript<br>NM_001174072 |
| 0,73 | UTRN               | utrophin                                                                                           |
| 0,73 | ANKFN1             | ankyrin-repeat and fibronectin type III domain<br>containing 1                                     |
| 0,73 | CFB                | complement factor B                                                                                |
| 0,73 | FGL2               | fibrinogen-like 2                                                                                  |
| 0,73 | TRIM6              | tripartite motif containing 6                                                                      |
| 0,73 | OCRL               | Transcript Identified by AceView, Entrez Gene ID(s)<br>4952                                        |
| 0,73 | LAMA1              | laminin, alpha 1                                                                                   |
| 0,73 | HBE1               | hemoglobin, epsilon 1                                                                              |
| 0,73 | SCAMP5             | secretory carrier membrane protein 5                                                               |
| 0,73 | TTC28              | Jeck2013 ALT_ACCEPTOR, ALT_DONOR, coding,<br>INTERNAL, intronic best transcript NM_001145418       |
| 0,72 | HSPG2              | heparan sulfate proteoglycan 2                                                                     |
| 0,72 | ZNF318             | zinc finger protein 318                                                                            |
| 0,72 | SMCR5              | Smith-Magenis syndrome chromosome region,<br>candidate 5 (non-protein coding)                      |
| 0,72 | COL3A1;<br>MIR3606 | collagen, type III, alpha 1; microRNA 3606                                                         |
| 0,72 | IGSF10             | immunoglobulin superfamily, member 10                                                              |
| 0,72 | NASP               | Zhang2013 ALT_ACCEPTOR, ALT_DONOR, coding,<br>INTERNAL, intronic best transcript NM_002482         |
| 0,72 | SYNE2              | spectrin repeat containing, nuclear envelope 2                                                     |

|      |                              |                                                                                                                                                                                                                                    |
|------|------------------------------|------------------------------------------------------------------------------------------------------------------------------------------------------------------------------------------------------------------------------------|
| 0,72 | PAK3                         | p21 protein (Cdc42/Rac)-activated kinase 3                                                                                                                                                                                         |
| 0,72 | BTBD19                       | BTB (POZ) domain containing 19                                                                                                                                                                                                     |
| 0,72 | FN1                          | fibronectin 1                                                                                                                                                                                                                      |
| 0,72 | DGKD                         | diacylglycerol kinase, delta 130kDa                                                                                                                                                                                                |
| 0,72 | LINC00494                    | long intergenic non-protein coding RNA 494                                                                                                                                                                                         |
| 0,72 | CKMT1A                       | creatine kinase, mitochondrial 1A                                                                                                                                                                                                  |
| 0,72 | FBLN5                        | fibulin 5                                                                                                                                                                                                                          |
| 0,72 | VN1R1                        | vomeroneural 1 receptor 1                                                                                                                                                                                                          |
| 0,72 | ABCA7                        | ATP binding cassette subfamily A member 7                                                                                                                                                                                          |
| 0,72 | MLIP                         | muscular LMNA-interacting protein                                                                                                                                                                                                  |
| 0,72 | KCNH1                        | potassium channel, voltage gated eag related subfamily H, member 1                                                                                                                                                                 |
| 0,72 | LINC00092                    | long intergenic non-protein coding RNA 92                                                                                                                                                                                          |
| 0,72 | KMT2B                        | lysine (K)-specific methyltransferase 2B                                                                                                                                                                                           |
| 0,72 | HFM1                         | HFM1, ATP-dependent DNA helicase homolog                                                                                                                                                                                           |
| 0,72 | TRAPPC4                      | trafficking protein particle complex 4                                                                                                                                                                                             |
| 0,71 | RCBTB2                       | regulator of chromosome condensation (RCC1) and BTB (POZ) domain containing protein 2                                                                                                                                              |
| 0,71 | DGKD                         | diacylglycerol kinase, delta 130kDa                                                                                                                                                                                                |
| 0,71 | OXCT1                        | Transcript Identified by AceView, Entrez Gene ID(s) 5019                                                                                                                                                                           |
| 0,71 | RSPH3                        | radial spoke 3 homolog (Chlamydomonas)                                                                                                                                                                                             |
| 0,71 | C10orf62                     | chromosome 10 open reading frame 62                                                                                                                                                                                                |
| 0,71 | ACAP2; ACAP2-IT1; AC090018.3 | Transcript Identified by AceView, Entrez Gene ID(s) 23527; ACAP2 intronic transcript 1 (non-protein coding) [Source:HGNC Symbol;Acc:HGNC:41426]; novel transcript; ACAP2 intronic transcript 1 [Source:HGNC Symbol;Acc:HGNC:41426] |
| 0,71 | SORBS1                       | Transcript Identified by AceView, Entrez Gene ID(s) 10580                                                                                                                                                                          |
| 0,71 | C2CD4A                       | C2 calcium-dependent domain containing 4A                                                                                                                                                                                          |
| 0,71 | HDLBP                        | Transcript Identified by AceView, Entrez Gene ID(s) 3069                                                                                                                                                                           |
| 0,71 | ZNF660                       | zinc finger protein 660                                                                                                                                                                                                            |
| 0,71 | QPCT                         | glutaminyl-peptide cyclotransferase                                                                                                                                                                                                |
| 0,71 | LYSMD2                       | LysM, putative peptidoglycan-binding, domain containing 2                                                                                                                                                                          |
| 0,71 | PRAMEF16; PRAMEF17           | PRAME family member 16; PRAME family member 17                                                                                                                                                                                     |
| 0,71 | FBXO43                       | F-box protein 43                                                                                                                                                                                                                   |
| 0,70 | TMX4                         | Memczak2013 ALT_ACCEPTOR, ALT_DONOR, coding, INTERNAL, intronic best transcript NM_021156                                                                                                                                          |
| 0,70 | IFT88                        | intraflagellar transport 88                                                                                                                                                                                                        |
| 0,70 | MAGIX                        | MAGI family member, X-linked                                                                                                                                                                                                       |
| 0,70 | ACSM6                        | acyl-CoA synthetase medium-chain family member 6                                                                                                                                                                                   |
| 0,70 | AMOT; MIR4329                | angiomin; microRNA 4329                                                                                                                                                                                                            |
| 0,70 | ZZEF1                        | zinc finger, ZZ-type with EF-hand domain 1                                                                                                                                                                                         |
| 0,69 | BBOF1                        | basal body orientation factor 1                                                                                                                                                                                                    |
| 0,69 | LOC389834; AL354822.1        | ankyrin repeat domain 57 pseudogene                                                                                                                                                                                                |

|      |                  |                                                                                           |
|------|------------------|-------------------------------------------------------------------------------------------|
| 0,69 | KLF13            | Memczak2013 ANTISENSE, coding, INTERNAL, intronic best transcript NM_015995               |
| 0,69 | LRRC3            | leucine rich repeat containing 3                                                          |
| 0,69 | DLX4             | distal-less homeobox 4                                                                    |
| 0,69 | TBC1D2B          | TBC1 domain family, member 2B                                                             |
| 0,69 | DGCR8            | Zhang2013 ALT_ACCEPTOR, ALT_DONOR, coding, INTERNAL, intronic best transcript NM_022720   |
| 0,68 | SGCA             | sarcoglycan alpha                                                                         |
| 0,68 | POU3F1           | POU class 3 homeobox 1                                                                    |
| 0,68 | C20orf195        | chromosome 20 open reading frame 195                                                      |
| 0,67 | TNC              | tenascin C                                                                                |
| 0,67 | CYP24A1          | cytochrome P450, family 24, subfamily A, polypeptide 1                                    |
| 0,67 | CHRNA4           | cholinergic receptor, nicotinic beta 4                                                    |
| 0,67 | PRKAR1A          | Memczak2013 ALT_ACCEPTOR, ALT_DONOR, coding, INTERNAL, intronic best transcript NM_212471 |
| 0,67 | RCOR2            | REST corepressor 2                                                                        |
| 0,67 | RADIL            | Ras association and DIL domains                                                           |
| 0,67 | PCDHB3           | protocadherin beta 3                                                                      |
| 0,66 | TM4SF19-TCTEX1D2 | TM4SF19-TCTEX1D2 readthrough (NMD candidate)                                              |
| 0,66 | ITGA11           | integrin alpha 11                                                                         |
| 0,66 | MARCH9           | membrane associated ring finger 9                                                         |
| 0,65 | PDE5A            | phosphodiesterase 5A, cGMP-specific                                                       |
| 0,65 | DUSP16           | dual specificity phosphatase 16                                                           |
| 0,65 | PTBP2            | Transcript Identified by AceView, Entrez Gene ID(s) 58155                                 |
| 0,65 | MUC16            | mucin 16, cell surface associated                                                         |
| 0,65 | VPS13D           | vacuolar protein sorting 13 homolog D (S. cerevisiae)                                     |
| 0,64 | LRRC58           | Memczak2013 ANTISENSE, CDS, coding, INTERNAL, intronic, UTR3 best transcript NM_001099678 |
| 0,64 | FITM1            | fat storage-inducing transmembrane protein 1                                              |
| 0,62 | TAC3             | tachykinin 3                                                                              |
| 0,61 | BGN              | biglycan                                                                                  |
| 0,61 | ZNF658B          | zinc finger protein 658B, pseudogene                                                      |
| 0,60 | BUD31            | Transcript Identified by AceView, Entrez Gene ID(s) 8896                                  |
| 0,59 | PPP1R3B          | protein phosphatase 1, regulatory subunit 3B                                              |
| 0,57 | GPR141           | G protein-coupled receptor 141                                                            |
